# Supplementary material for: Proteomic Profiling of Black Coral (Antipatharia) Skeleton Reveals Hundreds of Skeleton-Associated Proteins Across Two Taxa
Source: Frontiers journal article supplement (doi:10.3389/fmars.2022.904835), 2022-06-30
Supplement: Data_Sheet_2.DOCX [file Data_Sheet_2.DOCX]

2x Clean Only

>TRINITY_DN100611_c0_g1_i1.p1

MAPVLAYWKIRGLAQPIRLLLHYTETEFEDKTYEVGDGPDYSRECWVKEKDTLGLDFPNL

PYFIDGDIKLTQSNAILCHIGRKHNLSGKTEAEKARVDMALSQLMDFRNGFVGLCYGSNF

ETKKPVYIDKVKGVLKKFADFLGERKFIIGDEVTIVDFVLYELLDQHRIFEASLLDDHAN

LKAFLDRIEALPAIAKYMKSDKFLARPINNKTASFF*

>TRINITY_DN10136_c0_g2_i1.p1

ESLIRLVDEKLANLSSMLVDLGPMAHMASENARQLRGQADVLDRLLTDTTHLAGKAINAS

RRYADIAATLNDTLQIAIEAEKIACDAKNKSQDVSQEAEMSRLVSQQLDGNVTA

>TRINITY_DN10229_c0_g2_i2.p1

RITPKSSSHHNMAVKQICILVAFVVLAADALSWKNCDSGSPVQIKEVNISPDPSRLKPGV

KFSLSAKFQVRGDAGLKYKIHLKVQRKAWFWITLPCISGVGSCTITDPKLTCDNMKVLIG

EQVCPLPGKVYEIKHQGVIPKISVPSWLASGNYRVKADLRDFSSGRRIACVEAVTKLNF*

>TRINITY_DN10314_c0_g1_i4.p1

MSWDSYIDNLVAQTKDPSGTAHADRACIIGLDGGAPWTSAGHGSALKLQGQEGVNIARAF

KSKDFTSFMSGGIHAEGTKYQFLREEDKKLVLAKKKGEGALSLQASKTAIVIAHCPEGCQ

QGNTNKGVAVIAEYLESLGM*

>TRINITY_DN10319_c0_g1_i1.p1

WTKKEGASLVAYCRMAPNIQPAEGTAPKVTGYIVFEQPDHGGDTYITVSLYNLGKPYSEY

GIHIHQSGDIFSRGCQSAEGHYNPFNRNHGGRYSPIRHVGDFGNMRTDASGHAFDAFYGR

QVSLQGPNSVVGRSVVVHAKRDDLGLGAGESLENGNSGARLGCCEIYTLQHSW*

>TRINITY_DN10423_c0_g1_i6.p1

MTGRARGRSRGRGRASSAQQEPARRPGETQESMAPSGQVGRGRSRGPPPQAASAPPPARP

QEPSQAMAPSAAPPTKQMSQMAVGGPPRGERPQRGGRYTEPVTRPAGLANKTGTSGGAIQ

ILTNHFKLKQQPNFAIYQYNVSFSPEVEMKKARFGLIGAQRGLLGEVQAFDGMILYLPKK

LPDQVTKIQTTRRRRGTGERPIEEPLEITITLTNQLPADSPMILQVFNVIMKRLLKHIEM

VQVGRNFYHVSRAVQIPQHKLELWPGYTTSIMPYEEDVLLCADVSHKILRTDTVLEWMYE

FQSKLRGNQNFYEEAAKRLIGEIILTRYNNKTYRIDGIEWDGRPHHKFETRNGAITYVDY

YAKQYDKQVTDMDQPLLMSKPRRIPGRPQREDPIFLLPEFCYMTGLSDDTRADFQVMKDL

GVHTRVAPQDRNASLQNFIKDLNDNPSAARELTGWNMGFERGAEIANGRVLPGEAISQRD

KKYNYDRRSAEWTKEMRGNALQSTVNLSNWIMLHTQRDSGIAKDFSQTLQRVCGPMGIRC

SEPTDVALRDDRTDSYLNEIKSKLNDATQMVVTIVPTNRKDRYDAIKKLCCLERPVPSQV

IVSRTLSKKQMLMSVCTKIGIQLNCKLGGEAWALEIPLKNLMVIGVDTYHDSATKGQSVG

GFCATLNNTLTRYYSRVTFQHTGMELVDQLKVCMTAALRAYQNQNQVLPDRIILYRDGVG

DGQLPAVVEHEVPQFLETFKTLNSGEPYNPKFAVVVVKKRINTRLYHKDGNNRLNNPPPG

TVVDTKVTRKEWFDFFLVSQSVRQGTVTPTHYNIIHDNTGLKPDHFQRLTYKLTHLYYNW

PGTIRVPAPCQYAHKLAFLVGQSLHKAPHLNLADKLFFL*

>TRINITY_DN10485_c0_g1_i1.p1

QGNRWKDTYVSIGRRNGPFTLEFEARRGSSWSGDIAIDKVNMMSCAKPKQCPGSTPAGSF

RCGNGACITNNLKCDFTDDCGDGSDEAQCSSYLGRCNFEKDLCAWKQLKSPEDEIDWRRQ

KGPTASGGTGPARDHTLGTVAGTYLYMEAS

>TRINITY_DN106204_c0_g1_i1.p1

MVALLFVVTNHSKMGKLDKKTGWYLPEVAHPYHVFKAAGYEMLFVSPKGGHAPMDPGSAE

AFKDDPICKEFLANKDVMNKLDNTTAIGSVDASKYDVVFCAGGHGPMFDLPNCEALQRAT

TVVYEKGGIVAAVCHGPAGLVNVKLSNGEYLVKGKTVTCFTDEEEAAVQLVEQMPFLVET

KLKENGANFKSAPLFQACVQACDRVVTGQNPASATPMAEKIVELLKK*

>TRINITY_DN106333_c0_g1_i1.p1

PCGVMAGKTPCQKDRIRALGMMGSPAPGRFVPECDAKGEYKRTQCHHSTGHCWCVDRHGQ

EIPGTRSKGSMNCDDKGPLSDCELQRFKLQMSSIRDAYIPQCDENAD

>TRINITY_DN10934_c0_g1_i1.p1

MSGSRWVGRSTKYVPTSTYVLLLEHLVPQQQFVKIRKGGKQSGQTEMNHKLLLGVFVITV

GVVSAYDGAGKPDDDLKDIDKRDGARIIKGSKLKVQTLNNLLDEIGDYSRKCAIGLDNES

GNKWHRASRYFFSGTSDEVLPEELKHKHAVLFPARKKTGLLAGAVGVMCWCDVNSAYTVC

LMFSVPYDYNLYKNWWNVKLYDGCESASFNIYNELYYRADPFVGDGTWKERDLGNGLSVR

GSMSSSGAATLEVHVEKE*

>TRINITY_DN1101_c0_g1_i5.p1

MANGGVEEKSWGKRPFWGVSFDYDPQWLLDDEQKKIQQQLIELCRTTLRHNAVVSDDTYE

YPRKNMNALASIGLLGLIVPKDMGGLGQSHMFAALVTETIARYGCPSTAMVYVMHTGAVA

CLLFRYHNNPKLRELLQRIDKDCMIGTLAYSDPATGGHFWYPLSSRAKVQNGCVQLLKYG

SWATSAGFADFYVVQTTSPDFKGDYSNLSCFLLFKDEVRANTEEWISLGMHGNQSGPLVC

EGMFTEDRYIGPFGDGALSNDECVDPYFLLCSSACWNGISLGCIDLAKKHVTTKQHADVG

LRVADYPTIQDYFGEAVCDTNSCRMFTFGVAQAMDKATKTNDWSIHSDLTVAPRAELLHW

GWQLKFSAAKNVTHVADKMMHACGGTGFKKELGLERLLRDGKASWVMGPSNEVLRQYVGK

STLFGLPSVDFWAQQGNPRLLNSELKKLTDEEKVALAEKLMRDVSMNDPNNKSKNHPYQD

SEFDNPFNTKPPAVREPYTSPDGVVHKAALGPDQFVALKLVSVKDMGERQAEYQFSLPNP

TDHTGCLSGQYVQAEVTSSDGNPCRRYFSPVSGTSEYGKLTLVMKYETQGQISKQFKRLQ

PGDSVKFKGPCGGFEYGPKTIKHLSLLASGGGVTPCVQLVRDIMADPSDQTSVRMIYYAD

KESEFLYRSELDAYAAKDAKRFGLLYTMKDGLEFDEWRGGDGYIDGEKMASMLPPPGSAE

SHKVLVCGGPSMIITVLQYLFEMGYPSEDIFVYGQFGVEQLRSIFGRNAKLSAHRVESEV

C*

>TRINITY_DN11122_c0_g1_i2.p1

MLGLVTRSACVLGRAPRSSFSLTASQCLTLRARRNYTAMSTGETLKTPDDFMSSVAQRNP

NEPEFQQAVHEVVHSLWDYVHERPELVRANILERLVEPERVVMFRVPWRDDAGLVHVNRG

YRVEFNSSIGPYKGGLRFHPSVNLSVLKFLGFEQVLKNSLTTLPLGGGKGGSDFDPKGKS

DNEVMSFCQSFMCELQRHIGANTDVPAGDIGVGGREIGYLFGQYKRIANEFTGVLTGKSY

SWGGSLLRPEATGYGLVYFTAEMLATRGESFKGKRVAVSGSGNVAQYAAEKVLSLGGRVV

TFSDSTGTVYDPDGFDEEKLAFVMQLKNVDRGRISEYADKFSAAEFHAGKRPWFVNCDVA

LPCATQNELNKQEVELLVQNGCLAVAEGANMPTEPDAIDVLQQNGVLYAPGKASNAGGVA

VSGLEMSQNSLRSSWTREGVDERLRDIMENIHHQCARQGSAKGTDVVDYVKGANVAGFIK

VAQAMLEQGVV*

>TRINITY_DN111_c0_g1_i4.p1

YGRRVKEEILKDIAGEHGHHLLYANIVEFLKQVDVIVSEVCVIPVDGQWTEWTEWGECSV

TCGGGTRTRSRTCTDPEPEHGGKDCEGNPEETEECRTDPCEPPCDGAIDVGIIADISKSV

KRVNLPRLKDALKTIVDKLEVSEAGTHVGLITFAQDAEMRFSFADTQYQNTDAAKANINR

INKLFLQTRTDKPLIMANDELFTAAGGDRPDKPNTLIVFTDGKPTPTTPQSGYQPFSITV

PPLEDKGVIITAVGIGKGIDEDVLKEISGEKGNVVLVKDFKKLDAELERIKELACAGSK*

>TRINITY_DN11376_c0_g1_i1.p1

MASDLQEPILHIKASTIDGESMGADVFGQRFMMMMLLKDLEFKYNTVDVRYVHKQLPSLE

FGDTVIDDVAKIETFLEKGLDPKLASQIAEVNKLVNLGAGSGVFHKFCQLLKNADQTGDE

ALRRGLLEELRQLNGFLISDKMPGRFLFGDSLGIPDCILLPKLLHIKVVAKEFRGFEIPE

ELTGIHKYLEEAGKSEVFTTTSPPEDVIVDSWARNLSVPNPRAKGKPPKKA*

>TRINITY_DN1157_c0_g1_i1.p1

LTMVSVANAGVKLSHDDDLYRGGTYSVVCTVTGERFDGWYGPKGKITTDKAKSIHVETID

ASKKRLVIATPDGSDGGVYTCKGSKASANYTLSLLVVSTPYGNAQELQRRQTGVIQIDAG

GYPTPSFVWKKDGQKIDVKGRYSVRADGSLVIKNVQASDQGNYTCSSSIYGGRVTETKKF

DVKVYETAKITKHPKKDRYATEGYNITFVCEATGYPTVTYTWKNPINIVIKTFGRYHVDK

GILTIENVQPSDKGRYTCEVTSGDGKIQTAVSEIVNILVKPQISVYPDCREIEVAPRKEL

RLECKVIAGSPTVHVRWTREGKEYEMQQNLMEVMVEFIHAREAVGSDTTVIDIDPIRALD

SGLYVCEAYNGAQDANGEMIIVKKSIQVHVISKPVPNTILSPSAVYSFVGNELVTNIRCS

FYGYPA

>TRINITY_DN11763_c0_g1_i1.p1

MSAVATKPAKPKAAKKPASHPKYEEMITSAIQALKERTGSSRQAIVKHIKANYKVGDNVE

VQVKLNLKRLVVSGKLKQVKGVGASGSFRVNKDVVAAKPKPKKPAAKKTAKSPAKKPAAK

KPAKKPAAKKAATKAKKSPAKTAKAKKPAAKKPAKPTKKPAKAAAKKSAKAKPAKPAAKK

AGKKAGKAKK*

>TRINITY_DN11770_c0_g2_i6.p1

LRRPADIIDLSEIKMAPRYKLIYFDARGRMEAIRLALEYAGIPYEDQRIQKADWPAVKAN

GRFPFNQMPILEVDGNVLLAQSVSILRYVSKEAGLYPTDPLEAAKVDMIIDGLQDVRPHL

RNIFFENDPAKKEELRKKAYEEVLPDQLALFEKLLKSNNGGDGYFVGDKLTCADLHFFAM

LNNWLSYGKIEVPEPIQAFPLLAGLFGRVMNEPKIMAWLKRRPQTTL*

>TRINITY_DN1203_c0_g1_i1.p1

DESNCAGHPARCNFEHGLCLYSNSRDDKFDWTVATDGTYSYGTGPATDHTTGSKKGHYLY

IETSWPRKPGDFARLNSPVIDAGSTQCVMRFFYHMKGRDIGSLLVKQRTSYYANGLSKPL

FNVTGAQGDFWYKAEVNVPVSNMDYQLVIEGTRGASYQGDIAIDDVSLSPGCKLCSGTCN

IPGEPSPTPFGFHSRPTGSSCGVNQYVCKNLNCIDKAQICNFQNDCGDNSDELPCGTTCD

FEGDCAKGWRQATGADSFNWRRQQGKTASVGTGPSKDHNPGTATGYYMYIETSFASPGDK

AILKSYRYVASNANCRMKLWYHMYGSGVGSLEVKLKLSDGSYRTLKQLYGDQGNQWKQMS

LSISSQRDFEIMIQATRGASWQGDVAIDDITFENCFADIARNCTANEVKCRTNGHCVLEQ

HVCDFKKDCGDQDDSDESTAVCKARTANCNFETNWCNWFNWWNDDFDWKRQHNTGGVGTG

PSGDATTGSGFFVYIDSSLPNRPYDRARLANSVNFPASRGLCVIRFYYNMFGSKQMGVLR

LFVLRRNRGSWVWNWNEVWRTRGDPSNNNWVRQEVKLDSWSTFRVGFEATVGGDDKTDIS

LDDISFSAGCYQGGTPPPPTGSARCRATEFYCSADDQCINKHWRCDGTRDCSDGEDEVGC

PSFSTIPTPSPGPPTPADCNFTNSMCLWKSAYFADMTFTRNRGRTPSYQTGPDGDHTTGT

GYYVYAEATGRYPGHFGELLGPNMKGSQTCKVYFCYHMYGRSMGTLSVYKRITSDPKPDS

TQKVLWSTSGDHGNKWFCNMVDIKEAKDFSIVFEAMRGNGYQSDIAIDDIKFSDCGGLGP

TAAPTPTPKPSIVDETFEKCTSCWTNEKSGHDQFDWIIGRGETASQNTGPSYDHTLKTIY

GRYLYIDVSSAANVSGWAHADLESRVITKVQRRCFLTLWYHMYGAGVGALRIVAYVYPKS

GNENDKKEVNLLSLWGNQGNKWQQAKVSLYNPQTKDQDVRIAIGGQRGWDLTGDIAIDDL

QLHNCDLRDSVSPCSHKFAKCNDKPFTRPTLGALGGDCDFEHNGLCHWNNSGVADMPWYL

RKGSTGSSTTGPSVDHTQGTGQGYYIHVEASWYARGSIAVMESPYIMPTDSCTMTFWYHM

FGGDCGSLLVFLNSGDDLSLKFNETGDHGDKWFQGTVKLSSAYGFRVHLVASRGNSYKGD

IALDDISFKGDCKFTVDSSLKYGGKALTSGCSDGGREGFFNNPKVAGCRGLWWGRRNLRD

SPSSPDPLCGDDVGRWGRTCVKPADLCAKGWHICGTYGNISEIVNRTTGPDCKRAAYGRF

SAAINHCTDKQADDGCARPAVQKTYGCSMYHAPCSEPLCCGYDCSGPDPNNCDSGIFKNG

LTRYTTSVGQMQGCAFISMPSAGGVMCCKDDANTPTPAPTGPPTVGSCNFEKDLCSWTVD

KKDGASFYRYRGETPGRNTGPRYDHTRQDASGYYVFMYAAGAKPAAIARIRSPMLPSTPS

SCRVNFYYHMYGLGIGSLRMNLIVDGKSTKVWEKNGDQGDGWIRGTKDFQSQINSNKRFQ

IEFEAVRGPTAAGDIALDDISFTDCNNQQGKCHRDQFKCKTSGQCVSSNFVCDGVADCND

HSDEDGCGSCNLKQVYCKAEDKCLNRTLQCNGKKDCQDWSDESFCRCTDGYCLHGRCQLD

GDGRPDCFCQDGWNGTRCQNRMNFSCPAEQIVCKVGDWFCGNKTAVCNKEVSCNLSPSDF

KKYCPGSPPVNPAARTSDKKSTSTYIAIGVAGAVFLILLVLGVAYFVMKGRRRKLQLFSV

FYDPTKDDPSAIKGAKGKGVEMAEGVGNPVYDSLNDGQQLQEFQMSDLDTNMFVSDEAFG

MPSEKGGASSMANPLYQDPYVEEDLEKY*

>TRINITY_DN12185_c0_g1_i15.p1

MDPAVKQYFQKDHEDLNGSTPDEHIKKLYDNLAETYEKVNFGGGYRAHADCTEIFDKTLE

KLHGESRKNLKILDAGAGTGIIGSHLKDIGYTHVDAVDISPKMLNLAREKNVYKKVICAA

LCADPIAEIPTGTYDATVCVAAITTGHIKPAALDEMVRHIKPGGIICFTIRRNVYETEAD

FGYQTKMQQLEQEGKWELVSKELIDYYTNVDEVRLKCYAFVYKVTSH*

>TRINITY_DN12800_c0_g1_i4.p1

IFKTRFSYQFLHKTMQEFLAALCLHEQLLSGNFNCLTYLAQTAQRTIISSTFKYKQVALF

VAGLLSQHEAGRQRLVDLVSSLTRSPSVKGCSSFDYVCAVLRECAECEQLQLQEAAAREF

GWEGLVLGHMRLDENSAEYRVVCGALKKENCPLERLYLNNNNIH

>TRINITY_DN13319_c0_g1_i2.p1

DSRREVRRSISSEDSRKKMKCAVVFLALFVAAAICADDPYREKRWLIRKCSTQSDCGKER

CCLLGKFCSPKLPKYSTCYLSSLTKCGCHDGLACRVTKEITILGQKIPLRQCVEPTRSIN

VESLSDEAEVTAPNREKRFLIDKCSTESDCGENRCCLFNNICSKKLPELSTCFFVDSVHK

CGCANGLECKVTTTIKVPVIGTEIPIRQCVKKGE*

>TRINITY_DN1347_c2_g1_i9.p1

VKIGIKMADHHNVPQPFWENGPSPGCYYNFPAKQTSHSTAFQAGPSKRTLNPITTGTSVL

AVKFDGGILMAADTLGSYGSLARFRSISRLMRVNENTVIGGSGDIADFNYVKSVLQQKVI

DDACLDDGHCYTPKSIYSWLTRVMYNRRSQFDPLWNNIIVGGFYNGESFLGCVDKIGVAF

EGPTLATGFGAHIAQPLLRDAFEKNPNLSEQQARELLTTCLRVLFYRDARSLNKYEVAIV

TKDGSTVEPAASLHTNWDIAPMVQGYE*

>TRINITY_DN1399_c0_g1_i13.p1

GNGGTKQAGWKVAKSLKTSSQVHFRGLFKNMKIFLFLLLVLYALVTVDCACAGTKQGICT

KLEACQKKEDKLSDEVDKLDEQVKDLSNKKKELESDLSACDNKVEKLKKEIEGKKPGARN

CKDLLAAGKTTSGVYSVNPDGQGAFDVYCDQTTQGGGYALIQRRKDGSVDFYRDWDDYVN

GFGDFSGEFWLGLEKIHRLTNLAFGNELRVSLMDWAGNSVQAVYEGFRVAGEKDLFRMDY

DKFASGTAGDSMLVHKGMVFSTRDRDHDKWALNCAVTYKGAWWYNACHQSNLNGQYKEGG

NHVSFADGINWVTWKGYHYSAKSSAMRIRPT*

>TRINITY_DN14383_c0_g1_i12.p1

MKLFLLLLACFLLGVSQATTACGHGADIAIVVDKSMSIGEDNFKIVRRFLAKFVDNFQVS

RDGDHIALLTFNEWVRVIFPLTKYVTKGSMKGAIWSIPTKLDWETRTDRALKKVEKSIFT

EEGGDRPDRPNYVILFTDGKPHAEDMSDLDDVGEITSRLEKNGVTVIVVGYGKKIDTTTL

KKLAGANGRHFLMEDVSELEKSIIPVMASFCDGGYTDWSAWGECSVACGSGVKTRSRTCT

NPPPAHGGKNCDELGPTSEEEACNEEPCAVDGGYTDWSAWGECSVACGSGVKTRSRTCTN

PPPAHGGKNCDELGPTSEEEACNEEPCAVDGGYTDWSAWGECSVTCGGGVKTRSRTCTNP

PPAHGGKNCDELGPTSEEEACNEEACAVDGGYTDWSAWGECSVTCGGGVKTRSRTCTNTP

PAHGGKNCDELGPTSEEEACNEEPCAPPCKTAIDLGIITDVSKSVGKKNLPTLKQALKML

VDKFEPSVEGTHLGLITFAQDAELHFTFADSQYQNPDAAEVKIEQISHLHHQTRTDKALI

MANGELFTEAGGDRPEKPNVLLVFTDGKPTPKPGYKGFDVTVPPLVAKGVRIIAVGIGTG

INQEVLREISGENGSVFMVENFDKLAENLEDIKNMSCSS*

>TRINITY_DN14_c0_g1_i1.p1

MEKEWAKNHSKNVRETVEEYLVTYVGEGINQLIRYLEDEHINHCVPSNVSSGLASLPLQY

VYVNGTKTAEKTNPKLPNGDPIDGKKSYEKIMAHFTTNSMSPQEVHDLGNKQLRILYPQV

EAIATEMTGINDSARAIEVFRKKLNSSESYFNDEPIPKNESDKNAHEKCSTPAGAEKYCP

TRWKALMRWFKESRRVMSMLSPKTVDMFYFTGEKQTTPNCPLEMRPDLNPSSGAQSYKQS

DPLCTTPSYYNIPFFLENLGPTFSEWSVNAHEARPGHHTQAQGTMEHFHDVCGGATTWLD

QQTDYTPAYAEGWALYAESPLIAKDTDTYDNEPMQRFGMLKWQLWRAIRLIVDTGLHYKG

WSRDKALQYFNDYAWDDTDLARKEVTRYQSLPGQATAYMIGQLDIIKARETASNALKDKF

SLKEFHYQVLAQGSSPLDYLADHVNKYIECVQKSHGDGCDLILRPVKKSKPNVAKKAPKV

GKKNHGQSFVQPCITMFESF*

>TRINITY_DN15098_c1_g1_i3.p1

MAVGMMHESIWFDQAKFEEAEGHYQRVLAGTLGASSPQKESSGSVKEIANARRKIQQTLQ

TASTGGSAVGDGKRAAHLEQENEKLRKEVDELKAALRKLEARVAKLETGTGAPQPTPVKE

EKEVEKDDDDDEDDDDIDLFGSGDEDEEAEAEKVKQERLAQYAAKKAKKPAVIAKSSIVL

DIKPWDDETDLKEMERLVRSVETDGLIWGSSKILPIAYGIKKLQISCVVEDEKVGSDFLE

ESITAFEDLVQSVDIVAFNKI*

>TRINITY_DN1513_c0_g1_i7.p1

LNRTEITVTPGDVFTSEGKKFDLRCEAKTDQSLKVKYEWYKDGAVLSLKSRVMWNERENT

LTVVDAQTEDAGQYECLAYTPDPAARSEDKKAATVIVRGPPNPPTGLHITRCYNLSTELT

WIPGDPNHASIIYYIVEREDASNRNVFIFHSNVTQPNATRTTLSLTPWANLRFRMRAVNR

LGTSRPSEPTSQSCVTKEQAPDKFPENLRGLPGKAGELFIAWKPLSRLEQNGRGCKYSLW

YRKATDDEWTSTLLERASDGRFSVPNAGYYELWNFQIRAMNNFGSGPISPRVSSYSGQDA

PKNQPTSVELGFVTARSVELSWDRVAVERGSVEGYRVYYWSDSQVPRRKRRAIGANANFT

DVGNTGQGPRQQATLVGLKPFTDYKLAIVAVNSGGEGPQSNEVAFNTLEAAPGPPDNVKV

YPFGKYILITWSPPEEKNGIITGYEVGAVKYQNIQDVKTIPRDPKASNANRNLFRNLEFK

TKYAVEVVAKTKIGAGPGVRKFTNTIEESVPAKPRAPTVEADSIDSVVVTFLFGLEKGGY

PLEFNVHYREKLDSETWKKTGWVDHLDTQSVKIDGLNNVLYEFKTVARNDVGESEESDTT

DSRPLPGIVAGARADEPIHKAPWFIVLLVVIALLLLVLLILVLLSRRGRSRYPVGKRERG

RATILDDEPEEEDGIVFPRTEDIPPNYQSQGSLHKSNLSDSDRDSLDDYGEGPEFQEDGS

FTREYGDDKDGIKSPDQKDQSAFATFV*

>TRINITY_DN15325_c0_g1_i2.p1

MSVLFFNTMRYKVSDPRDASSDRFILSKGHAAPILYAAWAEAGLFPVSNLLNLRKVDSEL

EGHPIPHLSFVDVATGSLGQGLSCGCGMAYTGKYIDKASYRVYCVIGDGESAEGSIWEAM

HFAGYYKLDNLVAIFDVNRLGQSEATSLAHDCEVYKKRAEAFGFNAVIVDGHDVEALCRA

FFDASVSKGRPTCIVAKTFKGKRIPGVEDLENFHGKPMTKEKAKEATDFIKSLISNQGPH

GLLPQSVVNDAPAINTEGIKLSMPPNYTLGDKIATRKAYGTALAKIGKSCDRVIALDGDT

KNSTFSLDFKKEHPDRYVECYIAEQNLVGVAIGAATRGRTIPFASTFACFLTRAFDQLRM

GAISRTAANFCGSHVGCSIGADGPSQMGLEDIAMFRTIPDCVVFYPSDAVACERAIELAA

NTKSMTFTRTSRPALPVIYKNDEEFQIGKAKVVRQSPKDKCLVIGACVTLFEALKAADEL

EKDGVHIRVLDPFTIKPIDQACIIENAKAVGGKIITVEDHYFEGGIGEAVCGAVSEQPNI

TVRRLAVPRVPRSGPPDVLIDMFGISARHIIEAVKNF*

>TRINITY_DN1535_c0_g1_i10.p1

LCQPLRHPTSKWKIDVVCSWTSFWLGTQQNNPELHGILKRQKQSVNTYHVNTQGLCVSSN

EVKKASAGTEKAWQNAGKKVGLQIWRIVKFKVTDWPRQDYGKFYNGDSYILLNTYKEEDE

IKYDVHFWIGSESTQDEYGTAAYKTVELDTFLDDKPIQHREVANHESSLFKSYFKAISLM

KGGADTGFKRVEPKAYTPRLLRFKGTTMKNIEVKEMEYVRENITPEDVFIVDMGLDVYQI

SGTQCDKDEKFKAVQYVQELKSERGGKVKVHSTDYDGSTLRNPLDKLPSGARDEEEPESN

AKPALLKLSDASGHLETEEIPRIAKSSLKSDDVFIYDTGKHCFVWTGRHASVDERRKALQ

HAHNHLIRTDHPFVPVTCCCEGKEPKAFHDAF*

>TRINITY_DN15409_c0_g1_i2.p1

MLLCMSVVLVLAVPVLSEDVLELNDENFHSEVKDLDIALVEFFAPWCGHCKRLAPEYEQA

ATSLKAADPPVSLIKVDCTEAGKTTCGEFGVSGYPTLKVFRNGKVSQDYDGPRDSAGIVS

YMTKQAGPSSKEIKSIEEMKKFLEGGYSSVVAFIKDDEDLKKEFLKTAGEMRDKFRFAHS

SSEEIRKEYNFENELVLFRPPHLHNKFEPNHITFKGTETSFYMKRFIKEYIHGMVGHMTN

DNEDQFREPVAVVFFKVDYALNPKGTNYIRNRVLKVATEFKDRAMTFAIANIGDFPKKPS

EFGVDSSSLGSDPIVTIKTDDGSKFAMHEKFSVDTFKQFMADYFADKLTPYIKSEPVPES

NDGPVKIVVGNTFNDVVNDPSKDVLIEFYAPWCGHCKSLEPKYTELGEKFKDVENIVIAK

MDATANDVPVPFDVRGFPTIYWSSRKDKKKPTKYAGGREVSDFISFIKREATDPFILPVD

AKEDKTKKGKKSKKASPADTKESKKEKKSKKAKAPKDEL*

>TRINITY_DN15419_c0_g1_i1.p1

IQDASADDMGRYKCEASNGLRGPGGELLMDTVNIGITITEVPKIVSRPSGNVSLKAGDSY

VLNCTATGLPAPMVVWTKDGEEIPQSISEGNSVVTIQDASAGDIGTYKCTAKNGVTGPDG

KVIVDSAAVEISVTEGPKIVSPAIGNVSLSVGESYVLNCSASGIPVAQVVWTKDGDEVPQ

TSSEGNSVLTIQDASADDMGRYKCEASNGLRGPGGELLMDTVNIGITITDPPIISDIFNV

QVLQGKDAEIICVATGLPKPTVEWRREGTFVPQEQEPGESTLLINGAAEEDAG

>TRINITY_DN1542_c0_g1_i1.p1

MALYLLLSCLPFLSLWESSTGTPSPLGSYIKNYEPLYYDAASVHKVHRRSVERKQTTEFA

FTAFGKSHKLHLRPDNRIFTQDVKFENGHGKEIPFDRDAVVHGKVVGDPRSTVVGALDDG

GFHGKISTADGDYYIDPSYLHFDKPQDFPSVIYKSEDVEYEYNYPDITKRFPDEARKRRS

ILNEEEVEHNKDHWRVRRLALSELERNTCPLALYADHYFAELYGSPEKAIRQLAVQLRAV

QLIYEKEFNATYPSYGLTFRVSKIVVYDKDDNRAIAADNLGVDTLLDIFSQQNYDDFCEA

FLFTNRNFEGGILGLAYIGSTSTAGGICSEHKYYKEKKGKRSYNTGLVTMKLYKRFTPPK

VSEITFAHELGHGFGSRHDPNNKECAPGGAGGNFIMYDKATSGDKPNNDIFSSCSKRSIE

KNVNNKRKKYEKCFIKFTDKLCGDQIRQKDEKCDCGYEETCGNNSCCIPAGLKNECKLKT

GSGYMCDPSQGPCCTKQCKFAGNGTICKSETGCTELSKCVGNSSACPSPVSKPNGTSCDK

GRKICHAGQCSTSVCVKYGLQKCDCTEEKDMCHLCCQKDDTCKRADDWSELSEKLNDTKL

VPGTPCDKLQGYCDAFSVCRHVDMEGPLLRLMNTYLTKEGIKELVAKYWWAILLGCIGLV

IIIALLIKLCAVYTPSHNPDKRPARKLPGRKTQPQRQHQPVEMQ*

>TRINITY_DN1553_c0_g1_i5.p1

GTPSGTLHATTSEAAPSASPVIDKTKSKADDAHTISVVWSEIPERDRNGIIRGYRVMYRP

QSEVATNVLNVGHVNTRATIQGLKTYTFYCIKVVVYTSVGDSPSGDCSWIRTGEEGPSAP

RNVSVQVQSSTSVLLRWIEPEQANGLIRGYEIIYKIVKDGQIISHRVTGQTYETTITGLR

PFTEYSFAVRGETTHKGVLSIAVEVTTLEDAPSAPVDLLADKSTDTTVLLKWKKPLEPNG

RIRGYNVRTFDTNTGAQLGQVLGVRVSCSLGTCSYTVSGLTPYRNVTLMVQAVTIKPGDS

SNCTAHTLEGAPSAPANVQASLLGDTIKVTWGEPAVHNGIIRTYTVYYSGSRTYHSSFKD

ANKTTVDVPQQEVVIKTLHPGTKYSIRVAAATKRKEGVKSEEKIVTTPTKEPVAPEEPKS

VETTSTTVTIRLSPCDPTNGELVAHQLIVEKLSGRLTRASGSNLPDNIFGFKEAKEDGSR

FYIAAKFEKSKVPEQFTVGDEKTYNGYYNAPLEPDTKYKVYFRGVSQGPEGLLYGEASSK

SLPATAKNDVKPNEDDSRVGMYAGIIGVLVLIIIVVIVFILYKRSTRLPTANVDVENQRA

KKRRRRELELKRLIGKKRSLSKPNDVTDDPEHPPISADHFAKHVAKLHKSDDRGFMIEYN

KLADGSDYATDAGLLMENKPKNRYMNILPYDHSRVLLSPIEDVEGSDYINASLVDGHNKP

NAYIATQGPVPPTFPDFWRMVWEQQSSTIVMLTNLQERHRLKCHKYWPDQFEEYGDITVT

LMKAEQYADYVIRTFNVKRECEKEEREVKQLHFTVWPDHGVPEYPTALLAYRRRVRAYNP

PDAGPIIVHCSAGVGRSGTFIVVDSMLDRLSSEGTLDIYNYVAYLRTRRSFMVQTEEQYT

FCHDAILEAHQSGNTQILAHDLRINLSRMNDVDENSKCTRFEAQFKTLNKVSPVLPKACF

IVGSYPENKGKNRFPDVLASDYTRVMLTAIDDNEITTYINAVHIAGYKQQHAFMVTQYPL

ASTVADFWRMICEQESCCVVLFRSSEDEDLPVFWPETGTESFEDMITVECLTNSSSSVDN

LKNSYDQSLIRESHFKMTDLRTPEKQLRAKFFYFGGWEDEKNPPACSTMISLIAKVEQWQ

QRSGNGPITVMCRDGLGRSGTFCALYSVLERVKVEQVVDVFQAIKAMRISRPGLVKTEEE

YRFIHFAVQEYLTAFDDYANFK*

>TRINITY_DN1572_c4_g1_i4.p1

MSAEIQGNAASSPPRGKSLRNRISCNVQCLDGTELTVDIQKNAKGLDLMHRVIEKLNLQE

KEYFGFLWKDKKGELFWLDNTKEIRQQLKGANPVFTFSVKFYEPYPSQLKTDYTRYLLCL

QIRSDIISGRLPCSFTNQAVLGSYTVQSELGDYEPQEHGPNYLEGIPFAPDQSPELLDKI

RELHISHRGLSPEESDMQFLRNASKLTMYGVDAHPAWDDKGQEVMLGVSHMGIMVFKERR

IDLKIPWAKMKDISKKKTKFQVRHSPGEMESFRTTNDYKLPSEKANKRLYKSCIEHHTFF

RLTFPDPPPSGVTLLKMGSKFRYSDRTLHQLRKEGFNVKEQPAFTRVSSKNWSQRYNFQP

ITEHRVTVDDAKKPKHEAPVKPPRRPVVLAEEESVATMTKEERELYLKNMKDKYGPAYQA

EFSRKPGEEPEAMELKALPVEAGVAETTAYGVAAGKPAIDARVTSLSDEERERRQKEKFE

REKELREQERLDWERREREKHKPETAGVTYRSGELPSASVSLVSTPRPKEEPQFVSVGVA

TPVSGETVKKAETLVAETDSYKGHVLRMSQPDMNRQPGSNPDINRTHTWGPRSRPDTEPH

ARQYTTLPARGRMDPPRWPDEDRRRSADDLDEPRQKPGGVALVSREELVRSYSPGGAHLA

FTTPHGQGQSEIRRSLREDVNLAHEPGERGFVRENIRRNEDSIKRQSGGLELEANPSEVH

TKTMTITSEVNPTIIRQTGAPEVETSVMTISGPGGRREVTESFAPSRAANQESAMDGRWG

RGGPDWRSDYRRQVPSVPTRTVVYDPNLRPASPSSRGTHDGVVSTQVITMDGTHPHTRET

IRHTVGPTEIITKEIIIQGDGEHLTAEELKDIIAKHGGTSQDVVTTTYTTKTQTIEREVV

TEAMRVVDDDGNIIKTGDPDTDAAIEEAVRRAREENPGAKITEIVITRTDDESSA*

>TRINITY_DN1631_c1_g2_i1.p1

MAEVSAAKPTDKSPNAAPPPTQDAAKKPAKGKEMALVNFLLKYIKFVGIALAVWMMGWLG

FSYIWVVSGLFVYVLWRMNQDEKKKRREAFKETADHEIEAVEARMEDLPSWVFFPDVERA

EWLNKMLVQLWPFINDMVVKILKETVEPEIQKNVPGFLSSIHFEEITLGQQPPRIGGIKV

YTRNVDRNEIIMDVDLIYAGDSDFKLSVKGVSVGIEDVQLRGTLRVIMKPLIPAAPLVGG

ISVFFLDRPDIDFDLTNLLNVLDIPGLSDIIRGVIDDVVASFVVLPNRISIPLTDIDPYK

LKYPMPDGILRIEVLEAKDLVKKDIGVFSKGSSDPYAILRVGAKTFRTKTKDSTLNPVWN

EVFEVIVDNAQGQKIKIKLFDEDKASDDESLGSVEADISTIVQQGGADLWLPLENVASGQ

INLRCTWYTFTADPSDLIPPAKAVHGDEMLATAALFVKLDSAKNLPITNPARGTASAFCK

LTMGNVTLQSKTIQDSTSPVWEEPFRFLVHDPKMQELGIEVVDSVKEKSIGKLDFPLAQL

LSDDNMTFEQPFPLQNSGHNSSLTCTFMLKSLVTRDDDTSDEEDGEDDAPAMIGAEDSQP

KDIPKKDGGEESTVRKRKTEAAKIKRSVNGDLKLTTRYSPNGSKFEVIVHEARNLLAVDS

DGRSSDPYARAYLLPDKSKSGRRRTEVKKNQLNPVFDETFEWFVPEDKIKERTLDITLKD

DASFFSKDKSLGQVLLDLGKLDLSKAVTDWYMLRDEKDKD*

>TRINITY_DN16636_c0_g2_i5.p1

MAGKFVRASKYRHVFGQAPKKDLFYENIKITRNSWDSPYCAVNPKFIAVVTESSGGGSFL

VLPLEKVGRLPQDNPIVAGHKGIVMDIAWNPFNDNMIASGSEDTTVMIWEIPDGGLVTNL

TEPLAKLEHHQRKVGHVVWHPTAENILLSASHDNLICIWKLETGEIAVEIDCHPDLIYSV

SWNTNGSKIVTTCKDKKIRIIDARKGEVLCENNGHAGAKPQRAVFCGNMDMIFTAGFSKM

SSRELGVWRADNLEKLDVEEIDNANGVNFIQYDPDSKMIYLCGKGDSTIRYYELVKEEPY

WHWLANFSSTNSQRGVCFMPKRGVNVNTCEVMKAYRLVSPSGKPGYIEPLPFTVPRKSEL

FQNDIFPDCVSDEPALTADEWLEGKDAEPKVMSMKEKFASKGKSSGSGKKTASKIGIARK

AKAAVQEEEIDLLAMQAAIKKLQETVAAQDERIKALEAK*

>TRINITY_DN1664_c0_g1_i2.p1

TVRQGSLRGAWSARYNDPGQWIEADLGKVVKVTGIATQGRADANQWVTTYTLSYSADGGY

FQPYRNKEMFQANRDRNTIESRLLETPIVARYVRVHPRTWYGHISMRLELYGCTEGISVP

PPSVCESALGPSSQFSASSEWNSNHGAGNARLHHQSGGGKTGAWSSKHNSPDQWLQINFG

KVATVNRVATQGRMDANQWVTTYRLAYSLDGIFFCHYEKTFVGNSDRYHVVSHAIKPPII

ARVVRIQPMTWHGHMSMRAELYGCASDFVPKVECRAPFRLKSPQLSASSQWDANHGPGRA

PLNTVRQGSLRGAWSARYNDPGQWIEADLGKVVKVTGIATQGRADANQWVTTYTLSYSAD

GGYFHSYRNKEMFQANRDRNTIESRLLETPIVARYVRVHPRTWYGHISMRLELYGCTEGF

EVPSSSCTEELDKPVLSASTEWAANHGAANGQLHHQSGQGKTGAWSARYNNLEQWLQFRF

EKMTKVSRVGTQGRMDANQWVKSYKLSYSLDGIFFQFYKEHGVVKVFSGNSDRYTLVSHV

IHNPIIALAIRIHPLTWYGHISMRAGFFGCTSGFESPHIPCKSPLGMKNRKILDNQLTAS

SQWDAFHGPERSRLHTHRVGSYRGAWSARANNKAQWLQVDLGHVTFVNGIATQGRQDANQ

WVKSYYLTYGNDGQHFNAYTAIKVFHGNWERNIVVGNAINPPITARFIRVHPVSWYGHIS

LRMELYGCKDVDGGWSEWGAWSKCSEDCGYGLKSRRRTCTNPPPQNGGKHCFDSGGFAVE

YQTCEAPCREH*

>TRINITY_DN1796_c0_g1_i6.p1

MAAPQTPLVLLVAVFSVLIHARISAAVDQAEENKALDFLRKYNNETRARKWERTQVSWVH

ATNLTEHNARLKTSASLAFSRYLTKKREEAAKFDTSKLSEDTARQIRFIKATATAKDPAV

QKQLTDLEGELDNLYSSAKVKDKDGKLLALNPDLYGILRESRDYDRLKFVWQGWRDASGR

KMRSLYKEFVKQSNQGARDNNWKDTGAWWRSWYEVDNLPEIVEGLYQSLKPLYQELHAYV

RFKLRDTYPQISEDGPIPAHLFGNMWAQTWANIYDLVEPYKNKSSLDVTKTMVKKNMTVY

DMFALAESFFTSIGLEPLPKQFYNKSMLEKPADGRDVICHASAWDFSVVKDGERDVRVKQ

CTGINHDFLVTTHHELGHIQYYLQYWDLPVEYRTGANPGFHEAMGDTLSLSVDTPQHLKK

IGLLESYESDDEADVNALMKMALRKVAFLPFGFLIDQWRWRVFSGDITSENYNAKWWELR

TKYQGIVPPVERSEKDFDPGAKYHIPGNTPYIRYFCSYVLQFQFHKAACEAANFKGPLHQ

CSIYQSKEAGKKIGDMLKLGKSKPWPEALEKLTGSTKMDVGPLKEYFDPLYKWMKKQREE

KGYPLGWGEKTTKRPQTSGVCMVVPALLSILGTLLVCFACVYSSKVIV*

>TRINITY_DN19465_c0_g1_i2.p1

MAPKGNNMIPNAHFHKHWQNYVRTWFDQPGRKKRRRVARQKKALKIAPRPVAGALRPRVR

CPTFKYNTKIRAGRGFTLEELKAAGISRKVAPTIGIAVDHRRRNRSTESLQANVQRLKEY

KSKLIVFPKKAGKPKQGDSEEAELTNAVQLQGPILPIQQPRLPIKARKVTDQEKKTSVFK

TMRIARANARLVGIREKRAKEKAEADALKKK*

>TRINITY_DN19489_c0_g3_i1.p1

PGGAHKMADDQNPFFDEETSDSKEPEAATNGIDDTTEISLDGEDDAGAEKPEETVDLGGD

DDDDERKPEPTPESGAAASVDVTNISEPSEFSSKPVEVPPEEVEEKTKAEEEEEEDAFDI

DIKITNPEKVGDGMNAYMVYKITTNTSMPAFKNPESVVKRRFSDFLGLHERLNSKYLHLG

RIVPPAPEKSVIGMGKVKFGKDESGNPAEFINRRRASLERYLNRLATHQILCQDPEFREF

LEADELPRAKDTAALSGGGLKRLVKSVGDTMFNLTSKMTESDQWFEEKQQQIETLDQQLK

KLHQCLEMLVTQRKELGVSTAAFAKSTAMLSNSEEHSSLSRALSQLAEVEEKIEELHTHQ

ADTDFYVFSELLKDYICLIQAVKASFQERVKTYSTWQHAQQTLTKKREAQVRLELANKTE

KLPAAQEEVKEWEQKVEKGQEDFEKISEMIRKEMKRFERNRVKDFKEAVVKYLEALMENQ

QQLVKHWEGFLPEAKAIA*

>TRINITY_DN195_c0_g1_i2.p1

GEIGKCSECVEVLDRRSVLCNYTKKFSDAKVTSGIASFMGNCLAKKSPGKEIADGDASKT

FTDLRDQKPNRYVAEPKTHSAHPALPEVPPPSPGWPLYVALYEYDARTHEDLSFKRGEIL

EVKPEDLSNDWWLARLRGTTREGYIPSNYVAPAETLEAEPWYFGNIKRPEAENFLKAPHN

GNGSFLVRDSSKGQFALSVKDGDIVKHYRILKTDEGDYFIARTLTFATLNKLVEHYSVSS

DGLCSVLKAACLKEKPQTVGLSYNTADQWEVSRDSLKLQQLLGSGNFGEVWQGMWNDTTK

VAIKTLKPGTMNPQAFLNEAELMKKLIYPKLVQLYAVCSRDEPIYIVTELMPKGSLLDYL

RGDEGRSQNITTLVDMAAQIADGMAFLEKHGYVHRDLAARNILVGENNNVKVADFGLSRL

LEEDIYEPQEGAKFPIKWTAPEACLKHQFSIKSDVWSFGILLTELVTYGRIPYPGMNNRQ

VVEEVERGFRMPKPHSCPDLLYDIMLSCWKKEPHDRPTFETLHWQLDEYFQTDPSQYKEL

EQ*

>TRINITY_DN2075_c0_g1_i1.p1

KDVAAELDLEGETISNIQQSSSYPDQSDKAFRMLEVLREAGTCTYKQLAEALQRLNKGAH

AKQVLPPQASASGDMHEASREGGGSFSDEELEEKELKALSKCITSVYEDLGSELDLTLDD

VDRFTNDFTLKSPETKALKMLRFWFGETKSTNKRETLAKALEKVARLDLARKVRN

>TRINITY_DN21208_c0_g1_i1.p1

MRDIVINSKKINAADVPVSDRPKVVLDKCAIHDFCHPNPCLNHGTCEQDGVTFTCKCDVD

SGYKGTICQFPVYPLNCAELKRKYKNTQNGNHTIDVDGPGPLKPFKAYCYMDDKKWEDCV

TKIWSLELNQQVVKYPPATGEPKLSFVRNVKYAPSLEAAKALARNSDNCTQFIEYGCKRS

PLLNGGDFYGRWVSADGVHKSYWGGADSKSTACGCYPNCLDRSKTCNCDSLKGTWESDKG

NLTETSALPVSQVWFGGVNSDRNKEGNFTVGDLLCRGEINNTATFINQDGMLKIKPWMPP

SHGVLSLFFRTPYPTGVLFSNGDLEKEYVQLQIVNSTTMVLNFDVGSGTKSVFVTVSGEL

NDREWHEVVIYRNPKEFTMRVDDVQGKVILDLSSQRDLNVEGDMYLGSDPKALNGFVGCM

RGLTVNGEVIDIQTAANEADPGSSVAGGCGAACHNNKQCRNGGECLDNYDVYECNCTLTP

FYGYFCNLDHGAFFDQKSYMKYTYPTIESFSGVDMTVGFKTDKCQGDILRITSKDTDQFI

LLGFQEKELKLVFNSGVATYETISSSACDGKRHSFAMTRRNMRVAFRFDEGDWKWIDKHN

LNKPFASMYQLIVGSTDETFEGCITGVKVQQHPLDKKRAAIQPIDASLYYDSASSEVKAQ

KARVSVSGLTSISRMKCGPEPVDLPPIPTPRIPRPGTPAPRRATTAPREDDGEGSNTAVI

VIVVLILILVIVAVLVAIYWYWARHKGVYHTHEDDENIKSTDPYIDLVPTSKQADDTEKK

KEWYI*

>TRINITY_DN21440_c0_g1_i2.p1

QPLADRPRSHVAYYKFKDLLMESKGILCLLIVALVGESTVHAADWTYQNNRAAKWPEQYP

ACNGSKQSPINIVPCKAVKKDMASFSFVNYNKVPANLTLAMNNTGHSLTVFLLDMDATIS

GGGLTGTYKAFNVHFHWGKSTTSGSEHEIDGKQYAGELHIVHYNTKYADISTALSKEDGL

AVLGVLLKSGATNTNLEKFMKYAGNITEPKSTINIDAFQLDTLLPTDRSFFRYSGSLTIP

MCQQSVTWTVFNKMLEISTAQLNQLRGMKETGNHPLEMNWRPVQPLNGRVVHSSFKVEGC

PTPSPLPTSKAAHPTQAFAALLTVIFGALTLVFAR*

>TRINITY_DN2177_c0_g1_i1.p1

SYDSNYHRPYHDDEDTRDAGYGYSTHGYNHYRPPSNSLKGKVEKKYWHTKQTMIQKLGKG

QDLYVVAGDAEVDARLEAFRHIQKTCMDLLKAIEIYQNRIFALSQDENEMGRFLREQGSS

DKSKAGKMMIAVGKAQSYSAQQRLSLRTPLVRLYQEVETFRFRAVSDTLQTVTRMETFRT

DYRAALLWMSDISKELDPEEFRRLEKYREVQSQVKRSKKQFDRLKVDVMQKVDLLSASRC

NLLSSTLAAYQQAMLKFWENTSRTMRQVYEQFKGHPTYQFQMLKSLNPTPDEPEEEKIKE

VKLDQKTRVDENNAGKKNKEGETAKEATEEDDDDDQLISLDHSPAKDGQPAGEESTPGES

LIETDLLGEELSSGAQDNAPSAFIDLLGGDDLPAPKQGTDDFLSAFEGPAPLAKNGIQGT

PAPPSYEEAKGLQPFPEMLSNPSLGTGDLLSSQQAPSADRSGMTADDLLFGSPLHDKSAE

PANTVDLLNQILSGDSGAATNEPDNSFSQKWREMFGNETMASGTTAEPTDQSGFMPSDLL

DSMGRFDPFGGADMPSNSGPLPAGRTAMAKGSNNSGKMPSMSGLLTSSKQTLTSAKSVSD

KEKAKKAAGDLSAWFNLFSDLDPLANPDAVDKKNSKSEEERQC*

>TRINITY_DN21906_c1_g1_i1.p1

RVEVYAKCSLSKKPSKKFVLEGSWVIDGRQVPFEITKKKTTYELKELDEDFKAGTTISCQ

IRGRKKKGKNNPWSAYVKSDEIYTGITITPDTMTVREDEPGKPIVASMAFPIDGSGTDFT

VNKDLALNVIKGGASPDDIVISKDVITIVEKAVKSDELIVTAVRDFVDDGTKKSEVSFTL

VDDQPGESKFWEGYVPEVKKTVGKRSLDKRTSSNSVDVNTGSTGSSICITTCDPHITSYD

KKYYSQLRDPGDYILTSNRQRNFEVHARIHRCWSVVCNCGVAIRENNDVIKVDKCGGSP

>TRINITY_DN2233_c0_g1_i4.p1

MTHFDAQNAIRRAGQVLQLRLQRGPKVEGGKTVTITETIHSAKVDHKYNAVPKPFGQSAP

PPAPKTFEVPVSNMARKVPQAQAPPTVRTGSPSMNPAPPPPAPPMHQAPVARPMNSTPHR

DTYDGHARADRNQNINDEDLVNRFKFNISDDGEVDHQEWGHPPDPNVQSKSFKNLMKHLD

HEGTEDFPPPPPEAFDQPEEDDHKQVQSRTFKYLQDTVSSGEAAPSVFSRATEDRSKPSS

TPLPPMYRPKPPVIKPATQIHPVGPSPVMARPGQPKPVALPGMVEMAPAEPSHVPTPPRA

RGPSPIRVPSSPPQAAPSSGKAPTSPTGQQEFKRTPMKPGGSQPVPEGTRTPYCAACQQE

IFGPFASAIGKTWHPEHFVCDSCGVSLQYQGFMEEGGKVYCEADYNKFFAPHCATCEKPI

VGQCLKAIDKNYHPECFVCTNCKKPIGSEGFNVDRGRPYCEGCYKRLFCVKCSACSLPIG

GGERWVEALDKPWHAACFKCEVCHKCLEGSQFYTYGGKPYCVLHGAP*

>TRINITY_DN22734_c0_g1_i4.p1

IYVLESQLYFRVSLSGEDPGNNLKIKYAVRTKTGDTTNKLFRCPRNILFGDWNKVVLRFQ

DEKNLTEIYVDDILVGAEVFKGGIATFPSDAQLRLAQSYEIFQEAQPSIEKRFRGELQDV

KLERGPECKGAPRPCKCLPSGQKSCVMDATVYQEDQRWNRDKCTSCRCTDGQIICVYTCT

PCKDGDNVYISGDTYKSGCDDCVCGDDGKAVCSPPKCPQLDCSGKSGDTMTLPGQCCPIC

KEDQCKGTGKVYKTCGSTCPKTCQNFQTKLSCPCSEGCFCADNQVLRNGVCTSPSRCTCT

HNGKTVQPGSIVSSRCEFCICVMGTIHCSRFCR*

>TRINITY_DN22857_c0_g3_i2.p2

CAALSVGEALKCYTCTSTDSWEKCDEIKKEDNCGSGFDRCGKAEQAYKAGGHSVKSFAKG

CSTEAICDNVKQWLKACEAAKDAGVDATCKADCCTGDLCNAGAAPVVSAILIMACAVLAL

FL*

>TRINITY_DN2314_c1_g1_i2.p1

MVIVGIVAFQEGDPDRLLLPTDSQGKVCGKDYKDRKYLMFFDITTCVTKGGDLTQYVSIP

SCPTPQVCVKECPKKTDTGISPAAKDMVCKPGITPTDVTADKLDLVKQGKCAPYYLESSP

VLYRCIPSAVGDLLNQHISKANGENVTKDEVEGGISGLQFLLNARNFGMKVFEDVKSVWY

WILIGFLLTMLLALVYIVIIRWLAAPLIWFTIIAVFGLLIYGIYVCYTKYKFLEESGTST

DFELKFTFNLDSYTKSKDTWLGVGIFLTILLVILLLIVLVLCSRIRIATAMIAESSKAVS

SMVSALFFPIIPWLLQLVLFAWFLGVAVYLVTNGIPKYKVIDVPDSGDPYNLTNGADCDP

MTFEKDYNGTNGSCVLAGYTENVHLFRMQVYHFFGWLWIMNFIIALGQCALAGAFASWYF

AFHKPDDVPSLPVLSSFWRTLRYHTGSLAFGAAIIAIVQFIRAVLEYIHQKLKESGQDNK

IVTFIMCCCKCCFWCLE

>TRINITY_DN2336_c0_g1_i15.p2

NIRVRNCGGFFVYELQRTPTCYLRYCGNAEGPTQAPPTTPPAQPKECIDYKVLNGSDRAQ

GNTDQNNVRCDQRDLATPGWYRFRGDAGDRMPENQCVPMRRCGTHAPGWLNGSHPTVDEG

AVQRKVCYHWSSNCCRWSNNIRVRNCGGFFVYELQRTPTCYLRYCGNAEGPTQAPPTTPP

AQPKECIDYKVLNGSDRAQGNTDQNNVRCDQRDLATPGWYRFQGDAGDKMPGRCVPVRRC

GTHAPGWLKGRHPRVAEGVVERRVCYHWGKRCCRWSNNIRVRNCGGFFVYELQPTPTCAL

RYCGNAQAPTPRPPTTPPVPFGKGFVLLCLPRGIQVRVPRDVMRDWGRVHLNDPRCDVQD

ESDTHVVLKTPLDGCGTVRRSIHGRTVYTNNVIAHPQNDDDDEGGPPMNFPFMCNAQTFE

LPTERADEPMRDATEESQETELLTTA*

>TRINITY_DN2342_c0_g1_i3.p1

MSDYKLTYFPIRAKAEAVRLALSCAEVKFEDIRVSQEQWQPIKASGKTPFGKLPILEFDN

GKVLSQSKAILRFVGRRHGLVPNKHSDDFEFLIGQVDMLVDQMNDMEGNMGKFYYGDDEA

TKAVLKKQFYEETLPQLCVHLEKILNGNPKGKSFFVGDKITYADIAVFAFFNGYIGGGKE

QVPEEISGYSVLSDWYKGVMNVPNILKWIRARPANSMNYPY*

>TRINITY_DN2418_c0_g1_i2.p1

MEHEGQQELVHWGDELPKMGLLMVILSIIFMSDNVISETLLWHTLKKLGIEPKSEHEVFG

DPEKLITQEFVRQAYLERRKIVGGEETQYEYHWGARAQKELTKRKVLEFVAEMYGNEVDS

WTAQMKEVMAEEGQGSDTAER*

>TRINITY_DN2463_c0_g1_i2.p1

FTMAEEGEQAGKAGKSDEIVFSSTHDYIICGAGSAGCVLANRLSANPDNKVLLLEAGPPD

KSWKIHMPGAMVINLMDGSYNWGYQTEPQEHLGNRQFMWPMGRVLGGSSCMHFMAYIRGH

AFDYDRWEKEGAEGWSYADCLPYFRKSQTHELGENDYRGGDGPLHISRGKSKNPLIKAFV

DAGQEAGYPFTEDINGFQQEGFGFLDMNIHQGSRDSSATAYLKPAMERQNLTVETDAVVT

KILFDGKKAIGVEYRQNDITFNAKASKEVLLCAGAVGSPQLLMLSGIGNAEDLQKLGIPV

VANLPGVGQNLQNHLQVCVHQECTQSVSMAGSHKWWRALPTTAMWSMFKSGSGTTTNIEA

VGFVRKNETSSQPDIQFFILPMSDHHLDQHAFQIFAGPLRPTSVGHLQLKSTNPQDAPVI

QPNYLSTEQDCQEMRDSIQLARKLIAQKAFDPFRGKELLPGENVQSDEDIDAYIKAETIT

GYHVSCTCKMGSENDPTAVVNSKTCVIGVENLRVVDASIMPSIVSGNLNGPTVMLAEKAA

DIILGNDPLPKSAAPVFKGAN*

>TRINITY_DN2524_c0_g1_i11.p1

MWHHKLLCVWIIVIPLAISPSRGQKCSSEGTCADCIARAQCAWCSGEKFDQPRCNTYDQL

ITDGCLASNISNPGSSANDVKAESLGPTIQVKPQVVRLKLRPGDAARVDLTVRPAEDFPV

DLYYLMDMSFSMEDDLQKLKELATKIAASMRNITKNFRLGFGSFVDKTVSPYVRTELKLP

CKEGSVCIPSYGYKHILSLVKDEKRFQEEVDKQIISGNLDEPEGGFDALMQVAVCVDKIG

WGKPETHRRLVIFVSDAPFHLAGDGKLGGIVSRNDGKCHLENGVYVKSNYLDYPSIAHLK

AELLKSQIQPIFAVTSDVIKVFKDLSLSWAELGSVAGELKEDSSNIVDLIEESYAKIVST

VKLSYKAPDGIKVQHVADCGNFVSEDGGCNGVGLGQSVTFSIDVTLEQCNPEVQKEKSIT

IRVPGFGSVLLNLEYVCECQCEAPGFREDNSTKCTEGNGTYACGQCACNKGRYGDFCECS

SAFDNLQDQSKCRVNNSSKGPACSGNGQCICGKCVCNRDSRGRIYGDKCQCSDFSCDEFE

EKICGGPERGTCDCGECLCKGVYTGPNCGEVKCDEVQSRCKKDQDPICGGPSKGTCNCGK

CLCKNPYSGTYCEECHTCEGGTCSRVHDCVKCATFDGN

>TRINITY_DN25259_c0_g1_i3.p1

MAVGIYARISAKDYASLTGDTGFQTAANIMIAAGALVMIIGFIGCCGAIKENKWLLLMYA

FLLFLIFVLEIASGILAYSRRDEVISKIEETVKKAIEEEYGQPDKENLKKAVDNAQQKLQ

CCGVESPSDWKNSTFNKVPDSCCKKTGCNTAITENIYTEGCSEALQDFVKGKMKTLGGIG

VGIAIIQILGIIFAICLFRSIGYEKI*

>TRINITY_DN2533_c0_g1_i4.p1

MALPLLPGNSFDRKIGKTKFHKSQLFDYRNEVPAYVGQEKAGIGGGPLPGEKPKARHSHY

PKGVGPEAPAWVAFDRQVLCFDAYFQEAVHEKREEQYRIRKCKIYFFLEDDSIQVNEPKV

ENSGIPQGTLIRRHRVPLPAPNDDQFYTVKDFNVGKEIMLYSKTFKITGSDEFTHNFLRK

LGVRVNNPENIPRDPYTQHRKEMGESMQALRPYEKEDTLKQFLQHDRNVLRFYCLWDDGD

SMFGDAREMELHYFLADDTVEVVERTPSNSGRDAVPMFLRRARLPKEPTPLHQPGKITGR

TVLNVFGPMGHGGRWILDSLKTGAVHTDYYHDSDLTIGSVINVWGRKFLICNCDEFTKEY

YRSKYGLEDFPPIGYKAAPTSLPSREIPPYNGFGSEEDSLCSCLSLIPKPPKRDFIKFME

KDRHGLDSNVLRFVARLDTTRPIDVDRRFIISYFLSDDTILVFEPPQRNSGILGGKFLER

GQIKKPNGVQSYVAQVGCENSTII*

>TRINITY_DN2536_c1_g1_i2.p1

MASVFADVPLVPTDHVFSVNQAYNEDTSPDKVNLGIGAFRDADGKPWVLPVVKAVEMHLA

QEISNGTLNHEYLGIDGLRAFSDSACKLLLGNDNPAIVANRVTGAQAISGTGSIRLGMDF

LKKFYPSPTVYLSSPTWGNHAKILKAAGYTDIRQYRYYNSATKALDYEGLIEDLENAPEN

SIVLLHACAHNPTGYDPTQEQWTGIANTVKKRKMFPFFDTAYQGFASGDPDVDAWVVRHF

VSEGIELFAAQSFAKNFGLYNERAGNLCVVTVDSDTADRIRSQLKAIIRPTWSNPPNHGA

RIVTTALNNPALYSQWRSNLKVMTDRMIEMRQLLHDKLKEVGAPGKWDHLIEQKGMFGYT

GLDAKHVKFLADKHIYLLNSGRINICGINPGNVEYVARAIHEALTTVSLSAL*

>TRINITY_DN25572_c0_g2_i1.p1

MAPKNDMPMAVGLKKGHKVTKNVSKPKPSRRKGASNKRVKFIRDLVREVVGFSPYEKRCM

ELLRIGKDKRALKFVKKRVCICISLPCAKCNTLCMDVLAGLALRYNATL*

>TRINITY_DN27090_c0_g1_i1.p1

VFQNVQGTADALIGVCYDLSIDNDVVAVVNEKDEVKRRWDAHVASLLSVDKEMENSNKTL

AQVREVMEPMQQVMSEAEDILSTEPAKGFNLGEAKQELVRVTKIIDVLENTEVKLVRFSK

QVTNNEYIITIIKENRVMQIRLKERKVKLEKYIRTVEMFQGTGQEIETKIMGIMSFVSVE

IVVTDLESVKDEL

>TRINITY_DN2716_c0_g1_i10.p1

LSGLFQYLPQLSELTLSLELGRIIILTTVEIRIETVVCLQHWNRFPTMSYPPPYGGGYPP

ASQGYPPPAGGGYPPAPGGYPPPAGGYPPPQPGYPPAGGYPPMGTPAGYPPVGGPAAPGY

PPPTGYPPAPTGYPMASGYPPPPSQPPAPGGYPPASTYPTGTWAPPPTGGYPAPGVPPPG

QYPHQQPSQQQYQQPPQQNYGYQQGNFQSSAPPQVHASQAPAQAHPKPKQPSGAPEASAP

VGAAVAQMASMSLKQKYGHPVIVPISPFDAEAICEQLRKAMRGAGTDEQALIDLLVKCSN

SQRVEVRKRYKTMFGKDLMNDLKSELSGNLEECLLAMMEPTALYDAKCLRRAMRGAGTDE

ESLIDILCTRTNQEIAAIKQAYKDYYQRDLEKDCVSETSGHFKRLLVSMCQGNRDESDTV

DMEKAKKEATDLFQAGEKKWGTDESRFNVVLASRSFNQLRATFDEYIKISQRDILNSIDR

EMSGDLKAGFKCIVQCARNPSVYFADRLWKSMKGAGTDDATLIRVVVSRSEVDLVEIKQS

FLQKYHKTLYKMIQGDCSGDYKKLLQAIVGMN*

>TRINITY_DN2790_c0_g4_i1.p1

MSGKEVHELAIVPITCFAFNKARNQLAFSPNNNTVHIYKKAGAKWQPDIVLTEHGQRVTD

MDWGQESNRLVTCGADRNAYVWTFQDGKWKPTLVILRINRAATCVRWSPKEDKFAVGSGA

RLISVCYFEKEHDWWVSKHMKKPIRSTVLSIDWHPNNLLLASGSSDFKARVFSAFVKDVD

GKTNTDTAWGKKSSFGTCLAEFSNGGGGWVHSVSFSASGNKLAWVGHDSSISVVDAQKEK

QLVSIRTDFLPLRSCLWVTENSIVAAGHDYMPILFNHDDNGQLTFIQKLDVPVKKEDTGT

MSAMAKFRTLDKKGQGSDQPDGKASVQTTHKNAINQVQVYSGTRNAATKFVTSGVDGRVV

VWDVKSLESSIAGLKIA*

>TRINITY_DN28338_c0_g1_i1.p1

MGDSEFVPMKSAEAGGEPASKEKKAFVVSTAHAIAILILVIFVVILVGVLSGVLSAKQAA

KKAREEAFADMARRNSDSSTKGSPTDVAPTEPTGPEPWYQVRLPDDIKPIHYEVYLRPYL

SKNTFEGKVDVLFEVTKKRDKYANYILIHINEMSITKSSVSKQKEGIS

>TRINITY_DN2929_c0_g1_i2.p1

TIECSGLLTGDEWDELYKESERLLGKSESDLFPISIRNTVVTEALQKAFPKLSPRKMPYA

ASQTDKDSEFITWAGSDTILGDRLIKMIQEGDQRMTLKATWQCVKLQIAKSGDQIELAIV

KDLKTGKLYHIRAKLFILAAGAILTPQILFNSGIRPQALGRYLCDQPVASCQVVLLKSIV

DAIPSDPRWKALVERHRKEHPEDPVPIPLEDPVPQCWIPVSENRPWHSQATVDVLYGPTR

QNVDKRLIVDLMWFGRVQPRFENCVTFSEKVRDMFGMPQPTFHYTMASEDQAKAEEMMSD

MCTAAKALGSYLPGSEPRMAAAGQALHITGTCRMGRTPDDSVVDTNSRVWQFTNLYLGSC

GVIPTGTACNPTNTAVAIAVRACNEILQELKAGRFQ*

>TRINITY_DN292_c0_g1_i16.p1

MGVWTNVAHLHNQSLVVVILVFMSTTYLASGRGVRNVNRFPEADPHGDGFAPGREDARSS

LEIGTLHKRENKLDNRYLENQDGKYISVTASGAVIGKDRCDSRDLFTYEVRTDKSSYLLN

KATGRYLAIDSSGKLYTSFNGQSADADLALEIPLVSV

>TRINITY_DN31103_c0_g1_i2.p1

MVNLGDVFPDFKAETSQGEIKSFHEWIGDSWAILFSHPADYTPVCTTELGRVVEKTEEFC

KRGVKLIALSCDDVQSHLGWIEDIKEYIGVSGDFPYPIIADPKRELAVKLGMLDPDEKDK

AGLPLTCRAVFIIGSDKKLKLSVLYPATTGRNFDEILRVIDSLQLTAHKKVATPVDWKSG

QNCMVLPSISPEDAKTMFPKGVETKKMRSGKPYMRFTPQPE*

>TRINITY_DN31246_c0_g1_i4.p1

EGMPDLGAITTCIWMRSTHQLVGRNEAPLFSYATSRSNNEFMFFMGGGYLRVLCQAKSAT

VDYKVNEKVNDGQWHHLCSTWENSAGSMNIYKDGERLGGAVGYSKGQKIAAGGLLVLGQD

QDTVGGGFDPNQSFTGDLSGANVWNHVLTAQQISELSKSCLAGE

>TRINITY_DN312_c0_g1_i10.p1

MLAVLALFVMLSHRLHATDLPGMRLSLSQKGLDFIDQVAAGILTKKIQTLSLPDVSGDAD

TPVGHISYDLKNIITKSVSLGSSSLKTDPGIGLKLQVSGASVSLKGDWHYREDHWPHISD

SGSFDLSTSGITISVAVKLGADPKGHPTISSASCSSSIGSVDIDLHGGASWLYNLFDDQI

DDAIKSSLQGQLCSEVNDAIDEQAAKALASFPVQKAIDQCALIDYSLVSDPNFTANYLDV

FLKGEFKSISDPSEAPFSPSPLPPDSTSSQMAYACITDYVINTAGLVYEKCGRLNKTVTS

SDLPPNFSYPLNTKTFKLIIPKLYELYPDLPMQLQVYATEAPVLLSDVSGANVTIVGQLK

SFVVLKNASLAYTFTLGLKICGTAKVAVNAGNITFHTNFVSVHADLVQSAIGDIKPDIQL

LQLLLDAFVDKVIINEINKYGDTGFPLPVIDGVEMINTHVSSGKHFTMVATDIQYDPSSH

ILARKKQENNFGRKLITIN*

>TRINITY_DN314_c0_g1_i12.p1

QAHVLSSFLLTSATGSSASKNFKGMGLQYLWGCGLVLLVGALASHAELLGYPHEGCYSDW

RIQRDIEKDYSVISMRSKEAIETCFNWAKRKHFKMFAISDEKCHSGSNIHMRYQDYKRTD

ACSKDGTGGENAYDFYFVISGESCQDLPKGAYQDRFLCNRYVNCTGDKTIIGFCSKGLLF

NPASEKCEKGVPCKDGQPCLYVPKDGKYEHPSSCRKYLYCKNKEATEVPCSGDLWFNTKT

GKCDVPKNVDCPHDPCVDTNCRNGGTCEASSQSENKYKCVCTEEYTGSHCEKKVPHPCKS

GPCKNGASCTELGGEEFKCTCKAGFAGKLCQKDLCKSQPCRNGGTCYGFLHDQRGYRCSC

RADYTGDHCEKEIPHPCRARPCKNGAVCTELGGERFRCTCKPGYSGRLCEIDRCDPNPCL

NKGTCSHAYRGYTCKCTADYTGSHCEKEIPRPCRDEPCQNGATCTELGGEEFRCKCTEGY

TGKLCDKKKPKDTTIRAHSVILENEEGASNALMKFLGPVEDAGKSWKRCYRGSEFDFSSM

AFHAHCDKKGPTVVLVEAAGFVFGGYTDKDWTGWKSSYSYSKKSFMFSLKNPLGQPAKME

AYRYFDRAIYMNYRYGPCFGAGPDLKIANQCNKNAYSSSRLGFTYREPKGYHIKSADQVR

TILPVGRVSVSSYQFRVDEYEVFYQE*

>TRINITY_DN32375_c1_g1_i10.p1

NARLNFQAGGGKTGAWSAKTNDVNQWLQVDFGKKMKVTAILTQGRQENDQWVKTYTVSYS

DDGTSFMEHTENGQKKEFTGNTDRNSVASQDVAPPIVARYIRIHPTTWNRHISMRVEFLG

CEAAPTTTAPTLGPSTRAPAVHQLDRAAVLLQAPRIPVHQLGVQLLQQRHRR*

>TRINITY_DN323_c0_g1_i5.p1

MLRSACDLLKLVCLVVACGQLETATVDLLQWSSRCCVKGERKVMGNPSTPAICESDDLDR

RTMDRLTRLICRHAERGCCVRELMKSAAAKNCELGKYHAYQGRSCAQVDGHTSQLCCSCC

NLGIKARSLGVTRDWLIQSEPCDSAFKDCLQGDVTGAPPVATVEATTAPPTTVTALTTCD

EASCQHVCQFSDVTGAVCFCRTGYMIHSDGRSCTDVNECAYPNTCAANHVCHNTPGSYVC

RPTSATCEVGRERVNGNCQDIDECSRRSAVCGSLQTCSNTDGSYKCNCISGYEPIPGSSK

GCRDIDECSSGRASCGSLQSCVNTRGSYQCRCNRGFEAVPGSTRSCRDIDECARFSNLCS

AGLVCKNDAGSYQCVPAVTCGVGRENRNGRCIDIDECSTGKATCGSQQECTNTDGSYACR

CKTGYEPVPGSTRDCRVISGNVCNANTCPRGTTCRELGNRQHRCEDIDECQENPSRCSTN

EQCRNTIGSYSCECLAGYARNPTTRTCEVPSPCTRVRCRAGFKCVAVSQRQYRCEDIDEC

SQTPSLCKPEEECVNYAGYYYCRCPTGYEKKGGRCVDRDECRANVCQHTCTNTEGSFVCS

CRSGFRKAGRSCIDIDECKNSICDHRCSNSYGSYRCYCNRGYTLASDEHTCTDNNECDRK

GVCMYQCQNTPGSYRCTCPPGYRTFRYACQDIDECATPGTCSDNKTYCFNIYGGSRCLPK

VICSEFYEKTYGNKCQKRCPDERNERCEAIVEKSYAQYAYNLRSETKPFVLFSYQIFIAG

DSNSYLVRYTFSSGNEEGAFEIRNLANYKAEVLQTHPIVGPKSYRLSFDGEVIDNGKVIS

RYVNHLYVFVSAHTI*

>TRINITY_DN32608_c0_g1_i3.p1

VLVFIECSGRVVVLYRFAHCRLHLHASIKMSDDQLKTVFSSFCAFGAGSKDAKPLMDNAK

FGKLFRDLKIYDKKFTSTDTDIIFSRTEVKPKTERKINFEQFKVALALCAEKKYGSKDKV

GQMIEKICAGKGPGTSGATKAVKAGGVDRLTDTSQYTGSHKERFDESGKGKGLEGRKDYD

AKAAEGYVGGYKGKDTYDKSLLIRK*

>TRINITY_DN32740_c0_g1_i1.p1

ATLPVKGKVANGFQTSYDSQLDESEIETIFPVRLDAGRTRRDVSTATEDGHVDETSFFVK

TKNKDLILDVKRNANLLSPSFVVKSFGADDFEVIHQDQPDNCYYHGHVRGLPDSDVVLST

CSGLTGVIDDGENTYNIEPHLEHKEPGAHKLYLARDEDSHAGHDKCGNGDEFSFRKRDAA

SGNRRFRRNIANVDEIYREYFTTSETRYNEVIFAVDFEMYEGHNNDTKLITDRLIAVANA

VDRAYQRINIRIVVKAIDIWSNGDKVARPPDNKGGPDLGNFRTYRNKVYFEKYGPHDNAH

LFRSRGWADCAGMAWVFGMCGGNSEAVNAWSYSSILGPYVVLGHEMGHNFGFPHDSG

>TRINITY_DN329_c0_g1_i19.p1

MEFKLLSLCAVMVIFGITSSDAELIAYPHVGCYKGWKIRRYFNQDLGFWRGDDAIMQCYQ

AARKEGYKIFGITEGKCLSGHGAEKHYTSFDKSNNCNDKGTGGRNLYDIYLVAGGKQSCE

GLADGEYQDTTFCNRFYTCTKGSANVQLCPEGLLFNPANRECRDAAPCPRGAPCNYAPDG

EYIHPTSCRKYVVCHKGYAFEASCPAHLWFNTETKECENPANVNCRHDPCMESPCLNGGE

CKTSSQEQRGYTCDCKEGFSGTRCEKEEPKPCSANPCKNGGTCKDLGGNKYECSCKAGYG

GKDCNEHSVLAGSKILQGHSDYSKKLEDYLRPVEMKGKTWKLCFRASENHFLSASFHAHC

NHKGPTVTLVRVGQYVFGGYTDRDWISSSTYTHSVKAFLFSLKNHLNQPFKSDTYRNHGN

AIYSRNDYGPTFGGGHDLHLANHCHVNTNSYTNLGHTYRPPFGYGYTSSQAKNVFAGSYY

FRCNEYEVFYQA*

>TRINITY_DN33260_c0_g1_i1.p1

MMDAARDLTEERSSFLAEEARNFCLCNGIAMKLKVNGMEPSTQHAPFLLLPSQFPRGLFE

EVKAAQRDFNELVHKISHDHEFLEHSLRSTIAVDSFTAKVFEIYQKTRNEGLAQSISLGI

LRADYMLDRGDNGELGIKQVEINTIASSFSSLSSRMAGLYRYILKLEGRSDLTGSKMLPE

SPSAEGIAEGLIKAWELYSSESAVILVIVSDVSNVFDQKIIEHIIVERNSAVRVLRAKFQ

ELSDIAELKEDKSLFVGGQEVAVAYFRAGYVPDDYPSEKEWSTRLMIERSRAIKCPSAAL

HLAGTKKVQQVLAGKGVLERFVPDQETAQRLRSMFTGLYTLDEGPEGDKNMVMAMENPEK

FVLKPQLEGGGNNIYGEDIRTTLENEAGQRSKFILMDLIRPPVFQNYIVRAENQKPELAD

VISELGIFGVLISSPDKVLCNEEVGHLLRTKSVLHRDGGVASGRANLDNPLLTT*

>TRINITY_DN334_c0_g1_i9.p1

MSALLLSFFVVLSARSGTEGAMCPVTLPQDTPATSPCGIARQKDLAQNQAIYNLVSAEPL

HPFATLNMTQQQLGEIIKKDSFMREYAMSYIGMAKTTQAILTNYLQEFGQKPMTGFEDYA

KIKVSFKVALQLALGDKVRVPSDNEPFQGDFTQWFDDEFYAQQALAGVNPMSLQRVSIHG

DRRCRVKTVKGEWCRFPFEYRGQLYYSCTKRDHDRPWCSTRAQYGKRFWGDCAEEIDEEK

DEDHDCTVKTTEGEWCHFPFEYRGQVYTSCTTRDYYRPWCATTAKYKRGFWGKCADDDGK

KDETADVGLDFKKLSENLNPDFDWKDAVQRALNNKDISLKKAVRDAYVYALRYPICDNIP

TQRPDITDFDPNRTMRDFRSPIVLFVSDPGFIGGLKPVAIQTDHTPDSPVYTPDDGDSWI

FAKLEAQITDLGYSQMVEHLVKVHFVMEAVCVVLKRQIPSQHPLHQILKFHCREITVPNT

FGTPSLVNENAFNHLLFAYGNTGAVQFIRDSYDSTTWDVTDFRRNIKKRGLHDKGRIPYF

PYRDDGEVILKAIENMVSDYIDLYYKQDESVEGDKELQEFANEISADGQGQNGGKGQIKG

FPVKITSKKELKETVSRIIWQLSAQHASINYELVDYATYIPNIPTKIYNDTRVEAGKFSY

LNLPNRLTTAIDQRFISSLSTYRYDRLFDYGYELDDKKAREVLYSHFSRLMLKVQEMLEG

RNLERQKQGLLTYPYLLPRWLPNGVQA*

>TRINITY_DN33596_c0_g1_i4.p1

MAETPLQNVNSAAPGQSSAASSPDVGLSSVSLSGLPDVEVKRNPSQTPSAAVRGVKDMSP

EEIQAMNEKIRRESARKYFALRPDAYKNAVEECKGFLEESDGNFLSSWLLTEIDHWDHER

ERVVLLTEKMLILVQYNFIGLKCDTVFKIPLIKCDKVQSGRFIYPKNTMMMITNYAENSP

RMKQSGIRIHHAHTEPGFFQNWNPFSHEMPHVTLMDHPSAKLADSPPDYMKIDLFLKAVI

DAITDARAAEPAMQSVPRLEVAEEEIAIWMYVGLSALIFNQSKLGFCKDRGNIFY*

>TRINITY_DN3421_c0_g1_i1.p1

MAEALVGIELHTKTGKVSAAEALAGKKVVAVYFSAHWCPPCRQFTPMLKEFYDEVLEKHG

QDSLAIVFVSSDKSAADQQSYFQDAHGDWFALPHGNAAGAKLEKDCNVSGIPKLVIVDSK

GQPLKEDASSDVRDGSPSAAYQKWLELK*

>TRINITY_DN34749_c0_g1_i1.p1

TSCKTCPGSKATYGKGASSVSQCIDLNFCSSAPCNNGGTCSNAADGYLCKCPAGFHGKNC

ENEDDECANTPCAKGATCVDKVNGYKCLCPPGYSGTNCEVSGSDCQVGSCKNNGKCVELP

GGFECVCQDGYAGKFCERQVHECASSPCQNGGTCSDKVGGYTCACRTGFSGDRCERNENS

CNPDSCENGASCSDTKYGHECTCPAGYGGLRCQVNINECASSPCQNNGMCVDQTNGYKCL

CKPSFTGTHCEQEVSSDFDLSFARSNGRGTSIVEMRQELRAFTVAFWMKVSNSELDPGTP

ISYAATLSGGSVDDNALVIHDYNGFNIWVNSKKASTNVAA

>TRINITY_DN3569_c0_g1_i1.p1

MYSSRDVRGSATQPWAALGAWFLGPKGENGDLFQNLVRSAVHSHLKFREKYFPCDPIYVT

DEVKAASSYKETVDYMKKQLHSMSEELERSVPFFTSRYKGHVLWDTVMPANLGYITALLY

NQNNCAQEASVMTTNYEVEVGKQLCTMLGFDPDNSMGHLVTGGSVANQEAIWVARNMKYY

PLAIQEAVKDKNNPRLNPAQNYLVHIPVLNKEVPLVKVTQWQLLNLDIETIINMPEGVAN

MADMDGSELKTIMNNYTYECIGAHEFIKRHKLTTAPVVVAGSTCHVSLLKGANITGIGKE

QLITVAVDEHARCKVDELKRILETKLHAKIPVVAVVSIMGTTEESAVDPLEDILTLRAEM

RVKGLNFAIHGDGAWGGYFASMLRDVPSDFYLAGKDADPSGFVPELMLSTYVHRQISAFG

RCDTITIDPHKSGFCPYPAGATCYRDWKMNNFLNVTGDVTYYHGKVNLGDLGIEGSKPGA

AAAGVLLAHRVIGLHKHGYGRILAECTFTAKILYCAWATMAKPHDNYIVVLTQGFPPGDP

QEYMKFIEERILNKSNEELLQDKEAMAFLREVGPDTLIPCFAVNLKGNTDVETCNRINDF

LFKHLVHTDADMTAQRTPLIVTSSTMSHHRHSNALNHFKQRLGLDTSDTSVGVKYIITTC

LDPWTTSMDFIDDMVVIMRNAIRCAIGKKLEGETFHDFVSTGTVDNAGRVIVSYNGCFQP

NHEYFTMAKLRFIEDGATRDFRAKIQKVKKIDQPIVFRNKYPDKLHDILLFDPEEGEEER

SQRLEVFDVFVGFPPSGTKVMTAKMKVVDVPRFIHFDPTITNYPQFSTYFMYGQHNRAYI

SHVPVKYPDFEQLVQLVEAPAGVSPMILQHGIRVELPDVPGKPTVDGSGKVTNPLTASQY

RIKFIGENGVEMVSTMTLGQTIWFNGVMKPRSG*

>TRINITY_DN3569_c0_g1_i20.p1

MYSSRDVRGSATQPWAALGAWFLGPKGENGDLFQNLVRSAVHSHLKFREKYFPCDPIYVT

DEVKAASSYKETVDYMKKQLHSMSEELERSVPFFTSRYKGHVLWDTVMPANLGYITALLY

NQNNCAQEASVMTTNYEVEVGKQLCTMLGFDPDNSMGHLVTGGSVANQEAIWVARNMKYY

PLAIQEAVKDKNNPRLNPAQNYLVHIPVLNKEVPLVKVTQWQLLNLDIETIINMPEGVAN

MADMDGSELKTIMNNYTYECIGAHEFIKRHKLTTAPVVVAGSTCHVSLLKGANITGIGKE

QLITVAVDEHARCKVDELKRILETKLHAKIPVVAVVSIMGTTEESAVDPLEDILTLRAEM

RVKGLNFAIHGDGAWGGYFASMLRDVPSDFYLAGKDADPSGFVPELMLSTYVHRQISAFG

RCDTITIDPHKAGFCPYPSGAICYRDARMNNFLNITGSVLYYHGDVNLGDMGLEGSKPGA

AAAGTMLAHRIVGLHKNGYGRILAECMFTAKILYCTWATVAQPEDRFVTVPLQPLPPDET

TDHIRIMRERIIGKTNEELAKDEEAMKFLEKIGPDTCVPCFSVNLKDNKEDVDLCNAINT

AIFKDLCHATYLISPRRTPLLVTSSTLEDNTHNKTLEHFKKKLGLDPSDKTGVKYIITSC

MDPWATSNSFAEELGAVMRNTILCSIGTATDDRDIHYFVTNSVLDDDKVVVTYAGNFQQI

QRQYFTVAKLQFCSHEAAEQVRAKTTPGAAPLVFRNSEEDRAHDVLIFDPEEDKIHGRHQ

RTDKFDIYQGMPGEDDEAFMTKVVMKVLDVPRFDHFDPLATDYPEFSTYFMYGTAKRAYI

SHIPTKQPDFAQLVELQEIPDDMTPLLPMNGVE

>TRINITY_DN3642_c0_g1_i15.p1

MPAYHSSLSAPVSICKMALLPVNTKFKGPAPPGDGQMDIIDEALYFFKANVFFKNYEIKT

DADRVLIYLTLYVSECLKKLQRCTSGNAAKEMQTLAITNFNLPGEPGFPLNAMYQKPSNK

AESDNLRSYLTQLRQELGMRLIGKVFPDPQSANPSKVR*

>TRINITY_DN3644_c1_g1_i6.p1

MILMILLVHSLTASSDAASETLLRMPAPGPEWAWHSEGGGWTGTLGTLDQRTCTTQFPDS

PNNWLTSSVINVTETKAVFISINFTMKKCPEGESLCRENVTLYAYQGSEDSKICPERKRG

GYEYFATITAKHLWTNKGNRTRNTGTWRLTIKPNITYTCIAAHDQGACVTLLSFVVSYNV

CPPFTVPTSLVRFPRTVAPGHNSVNIRGSCPANALHRNISSIYGYCDSSGEWNTSLHYEK

CQCKQGFGLDDFNCQACRAGTYKSQQGNSKCVPCPANSASEEQATYCNCTENKYRAPGED

IAHKCTGPPSQVEKLTPVFVNETAATIKWTAPEETGGRTDLLYDVNCSATCQTKICDTRC

DSVFFSNGRADLATTHVRLESLNRRVTYTIRLLAKNGVSKLAGSLGDWSEKLVIRAVPGR

PNVTVAKKTESTVAVTWSAQNHPKDIKQWVVSCKTAGAGCRRNRTLGGSDTAHTFRDLLP

NTRYTFQVQGKNSRGLGPVAEISAFTRPSRHGRGGERASEAKKQRTLIVAVSVAVSSFVL

IICLALLLISQRRASTSALLENMALNGSEMTTKGKYIDPSNYDNPLDLLKDFTSEISRNS

VKLEDVIGKGEFADVHRGTLKTSEGNIVVAIKILKQGSALKNKDDFLFEASIMGQFHHPN

VIRLEGIITKTRPMMIITEFMEQGSLLDFLTAHKKLLTPLQLIGMARGVAAGMKYLSGMN

FIHRDLAARNVLVGENMICKVADFGLSRELSNDSESAEYMTQGGKIAVRWTAPEALRHRT

FYPASDVWSYGVVLWEIMGFGERPYWDWNNMQVIQRILGGYRLPSPPDCPQVIHDIMIDC

WDPDKNKRPTFGDIVSSLDVLIRSPEQMKRSKRRSLKQVFRKDIVDFGQVTTVEEWLESI

KMAPYLPNFQNAGYAELHDVARLEQDDLCRIGIRLIGHRNKIFKSIKRMHLHFTNLAYEA

C*

>TRINITY_DN3673_c0_g1_i1.p1

MAVAMECVIFEFLVTVLLGIFSGRGLATGEVVYAVNCGGPAHTDLHGVHYQADRLTVGTA

SEYGKTLHISRVSPPDQVLYQTERYHFSNFGYTIPIRESGDYVLVLKFSEVYFQGSRLKV

FDVAVNQHTVIHSLDIYDKVGRGTAHDEYIPFKVDGNRLLIDDDAFPFSNTLYVEFLKGH

YDNPKINAIVVMKGSVEDIPKLDPIPGIPDEDDELEDEKETKEDKPAKERKTSGPKVANP

YANDDSSMLFPIFIAIGVFLPTLFCLCRL*

>TRINITY_DN3719_c2_g1_i2.p1

YNGDCQQLCVNTPGGHKCDCRPGYALDRDNTTCRVTKDECATGEHECAQLCRNSAVGYYC

ECHNGYRIGDDRRSCEDVNECKRPQSFHHCSDICVNTPGSYYCRCKEGYVLSANGRICRD

VDECILGGPKCEQLCVNTPGGFHCACYSGYRPTPQIPHKCVDIDECSEGAPDCHVCTNTQ

GSFHCECDEGYQPNSNSTACLDMNECTVNNGNCSQLCVNTPGGFHCECEKGFQASDEASR

FCTDIDECTHNSGRGYCDHACVNTRGSFVCSCRPGYVLGEDKLSCIDINECEIRNGGCGQ

KCTNTPGNFSCDCFDGFENLGRKGTDVICSDIDECATGVHQCEEGATCVNTPGNYSCQCP

AGYYDDWNKCVDIDECEPPEVNGCHQVCTNTPGSFYCQCKSGYSLNDDNKTCHDIDECKL

DLCEHECANSKGSYQCFCPAGYQLAADKHSCEDIDECATNNGGCDHECINVNGSHSCACK

EGFELLRNGATCRDIDECSGNTSCCNQNCVNTEGGYNCTCWQGYVQTSRCQCTDIDECQS

RNGGCQQTCSNAAGSYRCSCAEGFVVDGGDPTKCNDIDECRVNNGGCQHDCTNTQGTYQC

TCKPTFKLQADGHSCGHCPTCEDFETLIQTVDLLRKQVASLEAWRKTLGNGCIEDFVFYP

HNSSWKKGRCTICACHGSEIQCEPILGCSEPLITVRGMDTTVSPNTSGAPTTDDEDEVSS

TTDGPTSEEPTDLFTINRKRRMH*

>TRINITY_DN38269_c0_g1_i1.p1

CWELVQKALSNERGRKEKMSETKILNPPVKWAQRKDKLFLTIGVEDCQNPDIKLDTGKLV

FSAKAGHEQNLYKFELEFFKEVIPEESKQHVTLREITFNIKKKDQNESYWPRLQKATKKP

HNLKTDFAKWKDEDDSDDDNGAYDESSFEDMMSQMGGSGAGKPMEPEPDSDDSDDEGLPD

LE*

>TRINITY_DN382_c0_g1_i1.p1

MGYCKRDISIEVSGETAVRLDFDEAKNQPLAFFEPSDGYRRPIVSIYQSKKMKIEFMGSH

NIFVHATQAGFTLQWTGASAFLTVGTELEGKTQGLCGLYNHDQSDDYHLPNGEEATSIDD

FTKNWLYQPDKQLKTCFEPSSGLVDSCSFYSSNAKWAEEHCNVLYEDEFKLCREEVDVSH

FYKKCRLDGCRCTSCLCDVVAAYAKACTDLGFDIAEWRKKAAPCDEQRHCKDDQELRQCN

RRNGELTCPQTCADLNEDSSTCKNRGCVEACYCKDPNMVLHENKCVLKSKCPCFLDGVPY

PQGTVLPLPDGCNQRTCMAAGQWEKSSKDCTAECAKMGMIFAQYGLTCDNQGFTEEYRQR

NAEPGCYCPSGKVRQEFSDNVYKCIQPDECGCKKGDKIFPKGAISPAHCSKKCDGKGKWI

DIQGVEPYPEYECSAFGQDQYRTFDGRMVNFHDPYCDMILMQGYDVRVVIRNVECQDSLE

LQMCKKVVISLLDIGKEITLFQKNFEFSGKIYKPGDYPEPCQSIANGVEVFKVGLFLIVR

LYDRNDRSNVKFEMRFDQGNRFYIKPNVDYKNQDKLKGLCGNFNGNSDDDRRKKNNLPLS

SDAPDTAFAKEWKEGDCPDPFAVDACTKYSDRARWATKGCNEILHNGNFSECRLAIDATP

YIDACMHEACLCNKGGDCACFCSAVAAYARACNRIGIAVLWRREGFCELPCCEGCKGGGG

YDPDIPVPSTCEEEGKVCDKDDDRCCKNPSVEGCACPPGEYSNGKSCAVEIGKCSRPCSS

STVSSTSSSTVSSSSSSSSISTTSSSVSTSSSVSTSSSVTSSSVSTSSSVSTSRAPAPVC

LPAAQSAPARVCRPAVRSAPVLSQHQLQCVNSDQH*

>TRINITY_DN385_c0_g1_i12.p1

MWVILLLCFVSVEARWISPEENLNAPRHIADNLIEGDMIIEGGVRGSIKKNLWPNGVLVY

DMHSSISQSSQARRAIQDAMNDWSKYTCIRFKRRTTEAAYVWMYRGGGCSSYVGRTGRRQ

EMSLATGCWHKGVVIHEIGHALGFLHEQSRPDRDNYVTIVWSNIRQGSEHNFRKGTNVDS

LGTPYDYGSIMHYGEKYFSKNNRPTIVVKTPGATIGNRNGLSNTDKLQMNRLYKCGGGPT

PPPPKPPPSGNLNCDFNSNDCGFKQSSNDNFDWIRRKGRTPSGKTGPSDDNGGGGFYMYT

EASRPRRSGDKAIMETDVVLNGRSCLSLYYHMYGSQMGTLRISVDNQPVFSKSGDQGNKW

IHAKDIALPGNGNKKLQFEGIRGSGFRSDLAVDDISISDCNQGPGPGPSPAPPPSPGACG

KRPQDARVVGGQNAQPHSWPWQISLRINGRHICGGSLIAKQYVLTAAHCVNSNPSPSRYT

VVVGAHRRTGTTSVQETLRVIELHIHNGFSMQTLRHDVALLKLDRPVKLSDKVMPVCLSS

TRPSPGTRCYITGEFRH*

>TRINITY_DN3994_c0_g1_i1.p1

MKIFVAFSATALLILSLGFRVKALKECQEGQRDKLGACGYFARRGYCHKSSSAYDYVTRN

CPASCTPCKPAPTPPPKPPKVDPSACLQAHNAKRAKHKGTSGLEWDYTLAAQAQEWAEYL

MNDAGKLEHSTFEGRHGAGENIFGGEADWVYTCPDAVESWYKEIAYYNFDNPPYDIDGGI

GGEDIGHFTQVVWKGTD

>TRINITY_DN4115_c0_g1_i19.p1

MADQFQGEASVEAYIRCLRMGCRCLELDCWDGPEEFPIITHGHTLVSKIKFVDVLRAIKE

NAFVASDFPLILSLENHCSIPQQKNMSQAFKEIFGSYLLTQPVDFNEKEMPSPMDLKHKI

ILKHKKLPKDPTQEQELQLLQQQQQQTSEGETKTEDDLSQSAKNGYLLLEDEIDHGWKRH

FFCLTRNTLSWTEEQTKPDDEDEDDSMLDGFGIGESSKDELHFGEKWFHGKLPDGRKAAE

QLLNQYNRGDGSFLVRESATFVGDFSLSFWRKGKVQHCRIKSRQENGQTKYYLVDQVTFD

SLYSLINHYQAHPLRSMNFELTLSEAIPQPNAHLDKDWYHDNLTRDKAEDMLKRVRKDGA

FLVRRKDTDEKTGEDSCAISFRADGKIKHCRIKRDGRLYTIGTAQFESLVELVEFYMRHS

LYKGMRLKYPINEVVLSKVGQSPDEEAIYGTGTVYHEPTAFVTKPACRALWDYEAQNPDE

MSFCRGAFITNVVREDGGWWVGDYGGQVQKYFPANYCEEINCVTEESVVEEEDESQEKDM

RPLGDLQKGSIDIEGCTIEMPPSRGPQKHLLRILKHGQLLLEACAESQEDLNDWLQELQE

VSNRAEEREARIRQIVRQTNLSQELSDLVVYFQPVPFSLDSLSGRHHEMSSFPETKVENF

IKRRTNKQFIKYHQKQISRVYPKGSRIDSSNYDPSLMWNCGVQLCALNYQTPDRAMQLNH

GKYLDNGRCGYVLQPECLRQDGFDVHDRDMAGVEPWTLTLTVLSARHLVKSGRGIASPFV

EVEIVGAPYDSNKFKTETKVDNGLNPVWGVPFEVDIINPTLAYLRFVVYDEDMFGEPNFI

AHAIFPVCSLKEGYRSVPLKNAYSEEFELSALLVKVELCSAKGGDESLYASIQGLRDRVQ

EISSQMQSEEIKAREAMSQMNYSTEVERYRDDHQHNMESLGRQLRQQQDELRKRQQERAA

KSQPVSDFRGPRSSFA*

>TRINITY_DN414_c0_g1_i2.p1

MKTILASQTVTIPDNVTVKVKSRTVTVTGPRGTLVRTFKHLRLELTMLSKKTLRVDVWFA

NRKELACVKTICSHIENMFKGVQYGYKYKMRAVYAHFPINIVISEAGTLVEIRNFLGEKF

VRRVRMREGVVCSQSGVKDEIVVEGNDIELVSNSGKDMCTFCIIHKKNVQCMCTSNVHCL

SWVSQA*

>TRINITY_DN44334_c0_g1_i1.p1

MISLQLVLSALFLVTIGITLSADVDRDVGVPASQEADSVEYPRPADPLPTSLEDEDAIVK

TVSDVPGLTEDMVAEALLESRREVLDEERKVKRDPMRKTRGYTHQSMHYRNRYHPALEPT

RKRALITERTMKKVADSLGLKTSREKRSLYGVSSPGLSRMSCFGKPRPMCNPSSPFRTAD

GTCNNLLRPNFGSANTPHTRLRDVGTDYADGISAPRVSVTGAPLPNAR

>TRINITY_DN4448_c0_g1_i20.p1

MGSGCRPSSIMKNCERCHADNDIVCDRCVRHFVKWKIYSSVQCKKNCPYGTRKVFNPPAQ

EYQCKRILPPACHVRNCERCVRGKTDECKVCKFNFAKTSVQHCVKICPPGTQKTYDEAAQ

ELRCKVYPVSVNCSVPNCKTCSEDMVCAECERFYAKISDAECSDTCPPGTRMVYEPIRRE

YKCEKLPSPGNMMVMITRMVMTLVIMTTTMVIMTVVMMSRI*

>TRINITY_DN4469_c0_g1_i1.p1

GRLNKFKMAVRLRGFSRTLLLRSVSCRLHKNYFCTAQSGHLLINNEKYAWLKELGLKAEN

DGVFNGTWGGRGEVVTSFCPANAQPIAHVRQGSVEDYNETVKLAKEAWKVWAKAPAPKRG

EVVRQIGLALRENLDNLGKLVALEVGKIYPEGVGEVQEYIDLVDYAVGLSRMFSGKIIPS

ERPGHVLLEQWNPIGLTGIITAFNFPVAVFGWNSAISMVCGNVQLWKGAPSTPLVSVAIT

KILSEVLEKNSFPGAVCSMVCGGAQIGQAMAEDERVDLLSFTGSTPVGQKVGTTVQQRFG

RKILELGGNNAIIVMDDADLEMVVRSVLFASVGTAGQRCTTTRRLILHEKVHDEVVERLK

KAYAQVPVGDPLDEGVLYGPLHSQQGIDIYKKAVEEAVKQGGKIECGGKVMDRPGFYVEP

TIVTGLQHDAQIVHHESFVPVLYVLKCKSFEEAVSWNNEVKQGLTSSVFTQDMGRVFEWM

GPFGSDCGIVNVNIPTSGAEIGGAFGGEKHTGGGRETGSDAWKGYMRRSTCTLNYSKDLP

LAQGIKFG*

>TRINITY_DN45290_c1_g1_i1.p1

LELVIVIFAFATCAGFIGNFEFMETCPVKGNGTTTSHKVQAKFYYPFDTMDIYHDKPLCT

NEKSVVHQSLDSVFQSSSQFFVFTGVVAMLFVFVAVVFYVFFEDQDKDAVATDIGICSFP

VVDFGFSIVLALFWFCGSIAWASALAGLKDKTNVETYTKGNCLGSCSVSKHATYGAANVS

VVFGFLNFFVWAGNLWFLFKETPWHSPRAGGARPPGEGGIPQEPPRQETPPASI*

>TRINITY_DN4559_c0_g1_i3.p1

PFSYFSIDCGDSTYNPSSIHFHRRMNCLFLRVVALAAFLVASSVLGKSSVNPKLTLTKVS

RKIDLATQVAKVSSSVTLKNEGDSSEGSFIVAIEPSLSDKLAYISVSTKASDDEETTLAS

KETQVESHSETKFFEVQLSQRVQKGASVELNIEEVYSHAMSPFPTKISQSEKQFVLFAGN

HYLYTPYKVISQTTTVSLSSSSVESYSKLKPSSISDSTITYGPYGDAAPFKSHPMRIHFE

NNSPFLAVVEMTRVIEVSHWGNIAVEESFHVKHVGAELKGSFSRYDYQRTPAPASIKSFK

SVLPAAATDVYYRDEIGNISTSNLFSHDEAVDLELRPRFPLFGGWQTRFYIGYNVPSYEY

LYNMGNHYLLKMRVVDHVYDEFVVDQLTVRIILPEGSMNIKMKSPYDVAEGKRGLHFTYL

DTVGRPVITLHKEKLVEHHIQDFELHYMFNKLLLLQEPLLVVGAFYLLFMLVIIYVRMDF

SISKDEASEARMRAAGLIEEVQRLLDRRSGLYTVYFDAISKFKSGKDATAFANARKKLDG

DYRSISNQVGQIQSALSKDQPESAEKIGELQRKEQDRKLLLEQAIVMAEKVVNNRLSKQA

YVDGENLNKTKREKLSVEIEAIASSL*

>TRINITY_DN4577_c0_g1_i15.p1

VETLSSRWPAFGELGRRQRKRKRRRRRRRRRRETSSGMNTKTIIALILMLASAFCAERQA

CEQMTTDGQCCVFPFTYFGEQYTSCTTVDSEVPWCATTDDYDWDGEWGECQEQEVVKPTP

EAEKQEVVKPTPEAETSPSVKCGTPWNEGRRKRRHVFIEEDKRIVGGSVVASVKNWPWQV

GLRESADYMIECGGALLNERWVVTAAHCINKAVGRPTGCVTRGTDKVQVILGEFDQENIE

GHEVVKEVAHICMHPKYDKETEDYDIALLEFKVPLKKFNAHMSPVCLPTSSSHFPTGTKC

VVTGFGKTAEKGEVSNELRKVQMPLVSKEDCQEKLYGHSITDRMLCAGAVPGKDSCPGDS

GGPLVCKDEQSGRYILWGVVSWGLGTEHIKCGLHTPGVYADVKHFLPWIAETMESVR*

>TRINITY_DN4577_c0_g1_i2.p1

MDVHRIFLFFVLAFSQFSGKALSMTIHERGECDDESDWCDEWAGDGDCEDDEQFMRQYCK

KSCGWCGVNPTEEPGSPTEGECDDESDWCDEWAGDGDCEDDEQFMRQYCKKSCGWCGDAG

ENEDPCNSYKFLPDAESRLTSAPGAEKCDDDIEKAWYRLSENNPDAKMPERCVKTERCGT

HATGWLKGKHPSAKQGIVSRTVCFNWEKRGCCDWKVKIQVKNCGAFYVYKLKKAPECNLR

YCIAEPGEPTEEPAVKPTEEPGSSKCGVRWDEEDKRIVGGTVAASNQDWPWQAGLKETRH

GEIFCGGSLINDEWVLTAAHCIHDLVKPGDGCVTARADEVKVVLGEFDQKNVDGHEVDKE

VSHLCIHSKYDRVTLDYDVALLRFKTPLKKFNATMSPVCLPSSSTGFPEGTKCTVTGFGR

TVEGGDLSNKLRQVEMPLRTLDYCTKKYEGHTVTDRMLCAGDANGKDSCQGDSGGPLVCQ

DEQSDRFILWGVVSWGIGCAQEGNPGVYADVKYFLPWIEATMKSIR*

>TRINITY_DN4698_c0_g1_i4.p1

MENREYEIVVFGASGFTGQFVVREVAKNSKGKFKWAVAGRNREKLEKVLRETAQEIGRDL

SREAHITIADVNDEASLNHMCLSARIILNCVGPYRFFGEPVVKAAVLNGCHHLDVSGEPE

FLESMQLKYHEQAVAAGVHVVGTCGFDSIPADMGIIFTQEQFPGNLCHVESYFTNHFGPK

GFVGHYGTYQSIIHGVASHSQGNLKNLRKQLFPQPLAKYGPKLERRGAMFFSKAMQKWCI

PFMGSDASVVRRTQRHNVEVRHKKPIQYGAYMTMPSLLSILMLFFMGFFFVLLCQFKKGR

QLLEKYPKVFSLGFFSHEGPTREQMDQSSFSFMFYGSGYSKKALESETLPPAPNGQIVTK

VTGPEAGYVATPIFMVQAAMVILEDTLPNSGGVHTPAAAFAGTSLIDRLQENGVKFSVQS

TNIAE*

>TRINITY_DN4856_c0_g1_i4.p1

MSIGVPIKILHEAEGHVVTLETLTGEVYRGRLVEAEDNMNCQMASITCTSRDGRVSQLEQ

VYIRGSKIRFLILPDMLKNAPMFKKMTQKSTGAGGSGAAGRGKSAILRAQAAARGRGGRG

GRGGNVFQRRR*

>TRINITY_DN4944_c0_g2_i2.p1

QKAAVNEMAKNFLESSDESRVGVIVYSDQPELSIDFGEYRTKEDLYRRVNGLAHKMSHTR

TDLALKFASRTLFAGSRVSVPKIAIVFTDGIQTPGNGVESLDKAVQPLLQKGVRVFAVSV

GTTVDMDELYAMVENPEDVFQVASFSELVEKASEFSEATCKAPTRVGTAEAAPRTVPSTT

AAPKPIVTATAAVLPRPQCNRILDVVFLLDSSRSINLNDYSKEKNFVKELAAIFSVGSGS

RASVIIYSDDPELKIRFDDFSNLRDFSDAVDRLPFIMRRTRIDKALIMASEVLKDARPRI

PKVVIVMTDGIQSRDGDAMSLNRAADYVHEQGARILVIGIGPKIVREELNLMVKSPAHLF

TVESFDSLIRVVRNVAVRTCATPVLKPSNNASGRCPEPAIPEVCSSTADKCSTDQSCFGA

KKCCFDGCLYQCTDPILPTEVAPVVKPGVCPGRTRSSCESVFDLCRNDQSCSGPDKCCFD

GCRFSCTDPQDSSGGHTESTIQHGQGLECSGTFDLAFVVDTSSAVGEAGFKMEKEFVKNL

AGKFSIGEVQLGLILFSDAPLLFVRFGGATSTSLDDFNQAVDRLPYLSGQPRIDRALQSA

NVHLFPGGRANVPKTLLLITRGTQARGSDSLTKVAKELRDRNVKVFVLGVGRSLDRRGFS

VLVDNTVTDLFLASSFGNLQALDGRVETALCSAFGKRIRKKLKRRS*

>TRINITY_DN49660_c1_g1_i4.p1

MKKRGQTKSEASKKKRPKLETADDEDVLRQTQRGLFFDKPRYGIFMTLTYKRGVKPDAVK

DEILAAVKNVLQFALSLEKNEDEASRTRAIAAFNPDQWKAWFPNEAHLSELEGRPSGPDK

GLLIPTSDKFIDTGGDIFFLLKSNGANQCDKVCEKVRSELKDYCDELDVTKSEPPSERII

QNSFRDGLANPCDTASLMNAVVNSDADSKDGFPGSTFLLTQKFRFNWLALGALDQTQKED

MIGRRMTSDAFGGFTHSRAHMKRAHVLPESMPVDLMQQHSRVFRVSMPYGADGSAAGREQ

GVMYMHLCNTTEVFKRILTNIAGSKSKSAPGEVTVDALLSNVQAQLGTWWYVPSAAELSL

PTYVERRFDLLDHWNVRSTNDYMFYNQKEYMHRMTTDAYTPGDPPSSRVMSLVDYMFCHW

NDQWFQERVWPPMPHLFEYLKTKKNKKAVGKVMTLSVALRKGWAIKRTLGGLLTTNKPEK

LEDDNFYGRKAGTFSLHPDDILAGRMPATFSLGLSQLAMPYLHDKEVMPAFVKGLSEAGN

FGHIIPHYQTLLDKGIQKLIDELKAASTKDGAEKDFVFSCILALQGIQKYHKNYAFLANY

MASNSSFNYSEAQRANLREVAQRMDKLRTQKPDTFVEAVQLIFSFHCCLHLTGEPTSIGR

LDQMLEPYYKDITKEKAQEIIDCFWLKLGEPVMLNNRLLNDQGAWGACAVPYSSTGVFAN

GDTINQWVQQVTVGGYKETNDVTPEDACNEITLMCLKAARRLPLNAPCLSLRMHKQMPQE

VLAEAAKCLLSGGAHPVLLHDDRLIPGFEREKPPGVALDLKTRRGYACDGCYEPIFPGLT

EFTLVYVPFLSVLEMTINHGSTFSMCGPAYLEGTPQSLPTAHAKDIKTFDQLKEIYAKHF

RVRVEYTIWLLLLNYGNLHTVCPSPLLSTLILDCVAARRDLTNGGARYPMIGVQFISFAN

AVDSLYTIKKLCFDHNTSILPLADMVKCLKCDWGNRMQEPWHDELAGPTHGQRLSDFYKD

VREKSLRLPKFGTDEAADNKDIQEISGWLADLATNTIQTVARGQDGQPLNDLIKSLQQKY

SVPGYPWDIMLPPGSGSFEGYVGWGLGLAASADGRRAGAPIASDISASPTPQDKPAVAKK

NDIYKALRCWNKQSINEHFANGTEIDVKIEETFTELDLVGFLKAYADQTAEVGGNLMSIT

CADEKTLSQAVTNPEQYDLVRVRTGGWGEFFISFFSAHQQHQQRRQYYHVTH*

>TRINITY_DN509_c0_g1_i6.p1

WADSCGFLRTISRLKDIKMLFAVLGTVLLLASEVPIKARAAKCTGDYVPLSGSSGSFQTT

NYPNKTELDETCRWNITVASGHIVKLSFADFDLGDRDPSSCASANVLKVSNTPNARAGLA

ELCGNKIPDPLFSFSNEMTMEFVSANQVALVPKGFNATYEAIPKDSVCPSAASLSSPSGR

IVSPYHPRVYPGGVTCNWTITAPSKPYLQLNFTAFNVDFGCNPDDCSCGYVELYDGNSTS

APRLGKYCGETLAYKRAPSVPLYSSQKSLTVVFHAISRQVFGNYNGFEAIWEESDFTPQV

CDPKKVVQLGKGPGTFNSPRYQDGTYVHSQTCRWLITAPSGSRIKLTFPVFELQQTELCE

KDKVLVYEGNAEKEKPDWRLCNRFREAPIVSRGRYLLVKFVSDNIVSYRGFTAKYEVTTD

PPSLTSTVAPTTPNDAAGYTSSTSALFLSLLVLFVGFLA*

>TRINITY_DN51623_c0_g1_i4.p1

GIEIWRIENFAPVKVDQSQHGTFYRGDCYIILATAGSRQGKVGKRDIFFLLGPECSQDEK

GACAIKAVELDDSFGGTCIQHREIGGHESDAFRSLFRDGIRSKAGGVKSAFKHVGAQKFE

KHLYHLKGKRRAIALEVPVSAKSLNNGDSFILDCGLKIYVFNGTFVGLQEKRKAIQMATK

IRDDERDGSAVIQVIEAKIRQQIRTSVQLEQDEETLKFFEELGCNKVHEIKSADEGGDDS

AAEKTEVRLYRTREEDGKVTMKEEGEKPLKRRMLNSDDVYILEAANQVFVWMGRHSSQSE

KEEALKKAEGFISAKNLPAHTPISVFKEELEPALFMSFFSDWDRVYTKEYYLQQQISTSR

IAKVQQTKFDASKMHEEVARKEARMLDDGSGDIQLYRVKDFNMEEVPKDKHGIFFSGDCY

VLLYTYQDQGGREKYVVYYWIGNESSKDEQGTAAHKAVEIDDQLGGKPMQVRVVEDKEPR

HFLKLFNNRMIVYQGGHRTGFKNVSSTVQGAPDGLKLFQIHVSDKEFRAVEVVPRTASLN

SFDAFVLDVRSSVYVWCGKGCAGDEREFAKEVAALVNPRGRDYQLLVEGKEPQQFWNVLG

GKGPYASTKLAKEDLQDHPPRLFHASNATGRFIVEEVLDFEQEDMNEDDVMILDVFSEVY

VWLGKDSNRKERELSVTAAQEYLQSDPRGERSNVPIYLTKQGCEPLAFTMHFMPWDPDFW

DKKTPYSAMLQKVGKDNEERAPVVQQIRKASSVAKQTYSVEELRKPPEELPLSVDATKKE

QHLTDADFEALFKMTREKFEALPAWKQNNAKKAADLY*

>TRINITY_DN5167_c0_g1_i1.p1

MSVKDGPCPGVGDCNFQSDWCTWRNAPRGDQFDWIRGSGRTPSSLTGPSVDRLGSGSGKY

IFIESSSPRKQGDKAQLLSQQFQGSASKSLCLTFWYHMYGSDIGTLNIYQKTGSAQRLIW

SLSGAKGNKWFSGQVAVGKASSYQLIIEGVRGKSYRGDIAIDDFEFKPVACTINPLNASP

GGPSTPTTLPTVMTTTSPVVNAGINCNFDQSLCSSWTQDKTDVFDWRRQAGATGSGGTGP

SADHTLGNGNGYYIYIETSSPRKLNDTARLISSTVPATSGSSGKCLSFWYHMYGADINRL

NVYVKTGAHKSLLWSKRGTQGDRWVEAKAT

>TRINITY_DN5286_c0_g1_i1.p2

EKDMCHLCCQKDDTCKRADDWSEVPKELHDVKLVPGTPCANLQGYCDAFEVCRRVNMEGP

LLRLTKKYFTKEGVKELVAKYWWAILLGCIGLVIVIALLIKLCA

>TRINITY_DN5309_c2_g1_i1.p1

MDKIQKQFKCCGVNGPADYQTSNMTGPIKSCCPEEKCEPPKNSSAKYNYFKSGCVSAFEG

YMRDHLMILGGVGIGIAFIQLIGIIFSCCLMRSIKKEYEVM*

>TRINITY_DN530_c2_g1_i18.p1

MVIKRSFYKLLKHLLVFSHVLNTCFPHIEMVCLALMDLLRYCSEQASHLDVRKACIEYMR

KNKEMFEEFVEGPFDHHLFRLQDPKEWAGQVEISALSLMYKRDFVIYQDINVEPTKVTDN

GFEDKILLCYSNGNHYDAVYDIKYKKNAAFCQALVYELLYKKVFPELDRRDQGRKGGMRT

LQEPLGFSADLYENGNIPDEFRENGNDDNDGWTEVKSRSQKAKSARQNRTVEQEEARDDN

SLRQSNEQKYQWEIHRSVDVEQYRNVAIEVWEEDKNNQQRQDLAIAASIQYEPNDKCFVY

LGPPKVPEEKLYSAIVKDTCTSQGYLHVYVAELSRRLTVSVQCLKPGDGHQAYKDLTGYY

RKGGEGGSPSGDDGFKDDGRGRRRKGIPKGRRGFNKGDEQEDGAQRRPYQDEGFGRPKPG

GQREKFNPRRGRPARGREDRTQRDEEDAKYQEQMKLEELRDKDPKSFPFLPTQHTEKKPS

APDTPVVTAAV

>TRINITY_DN53273_c0_g1_i1.p2

KIKYANCCTAPEPYGSQNGVCVTAYWNNLLKRENIWALCPSGRYLQGIFKSNRQWVSNIE

RGRCCKPPGHPDTWGECYDHDVCSSINKKGWSHCKEGYQMVGFFKGACDEINCIEKFRCC

KMQAKRKKPELCTEGN

>TRINITY_DN55461_c0_g1_i2.p1

VVSMAEGVSYAKATNDDEVLLQMAEPSMDTSKQDEAKGLYFTSDGSKKVDYVLVYEICKE

KEEKDPDFKDECRRLAEFRERFQRSLRHQGLELEEDEMISPQDDSVTRHFVKAHLPWNVL

LKHAQKMNLKAPIQPNDIEITPWYAKVPGGEWLRDMWEKKNPLVVQDATVIDKPDFFMAP

FHKEHLNKYIGYQDHATFFGVSDRHYVIQRILYSARFGEERHEAGLKKLLYDGAFIAGYP

LHDGTADLPSPDGAPTNDRQRLKRDWARFGRFYKFQPYENIKDYFGSEIAMYFAWLGFYT

AMLVPLAIIGLIVFLYGIGSATTSPPVRDICSTDNRGNWTMCPLCDRQCSYWDLAGSTSA

CLYVYVTHFFDNQGTLFLALVASVWATLFLEFWKRRQASLAQEWHLSDFEEEEQLRPEYV

STVTTLKRNKATGKMEPYIPAGVRCRRFSVIIAIITFMILLVLAFVIGVVIYRAAVFAVL

SASSDQTVRSRSRLFTTATAALLNLLAINILKIIYNKLAAWLTNWENPRTRTDYEDSFAY

KMYLFQFVNTYSSIFYIAFFKSEYVVGTPSRYRRILNRYRLDSCSQQGCFLELCVQLIII

MVGQQVIGNVTEVAIPALMTWLKRRKEKETDYPRYVKDFDFSPLQEHNMFWEYLEVVLQY

GFVTMFIAAFPLAPLFALLNSIAEVRVDAINFVSQFRRPDVTHAEDIGAWSRILEGVTKV

SVLVNAFVLAFTSEFVPKLVYMYKYAPDRENGGSLEGYLDNSLAYMSIAYINETEPGTLP

DNPNMFINATGLTMCRYKGYFNPTAPFKYSKQYWHVIAARLALVFVFQLVVSGITAFVAW

VVPDVPENLALKQKREKHLAKRKLRGKRDDDDDSDLSDVDENAML*

>TRINITY_DN5614_c0_g4_i2.p2

ECVDVKQMMDTWTLQMNYPVVFVKKEGGNYEVTQDRFLFDATGNETSKFKSPFGYKWVIP

FTYITQKEHRKEKSMFLNLTSGSFTDDGSKWVKGNVGQTGVYRVNYDDSNWEALRHQLKT

DHEVFNISDRAGLINDAFDLARGGKLSYARALNMTTYLKQEEEYVPWGAADLGFSSIESS

VPTTSPAYKNLQRYAKFQSTTLYQKLGFKDEGDHMKKYLRNILLTINCGAGEKTCLDQAA

EFFQKWMEDPIENPVPANFRFLVYFYGIKSGGEKEWNFAFDQFSKTTVASERRAFLYALS

ATQVPWILNRYLQYTLDETKIKAQDMRSVFSNIVNYNSGVGEQMVWDFVRLNWDVMQKRY

GGAFNAIRRVVYYVTAGFANEFRLKEVLDFKAAVNLPSGSRSLDQMIEKIKAKIQWRKQN

EDTINQWLEKFIKDNNVPE*

>TRINITY_DN5633_c0_g1_i1.p2

MGKGEAKAFIDKQIKENKVVVFSKSYCPYCKKAKEALNGVGAEFTLIELDQRGDLDVNAI

MDVLLEMTGGRTVPRVFIKEAFIGGGDDIVRKKNSGELAKLVQG*

>TRINITY_DN566_c0_g1_i4.p1

AKQFKDTDYRLSFNLFTELGVDKCGKNCEESLRRRIDKYNKWTKQVVEAIRGTGGNNKHR

ILILGSPGKTGKDLVKIDPEIYRNDPYMMAEWHIYASGPNKKSGAKEWHGDGSGGGRANV

KKALNEGIKFSKQNKLPTYFGAWMPIDEYKGELSEGEVISFVRFFVGELRKANLPWSLNV

LDDYYDTKKSKWITDKRKVGKYKIDMAKVLKTIQEVM*

>TRINITY_DN5715_c0_g1_i16.p1

MRFLHLVFGAAVCALLGLTDGTVTVLNPKDKVNYGQSLYKSLCTVDGGESFRAWKLPDGS

LLTTTDTSKRLHVESSGTQHFLVIRNVVVEDGGQYECLGTQGSAPMLIQIPFNIQPDSDQ

EIHVDREATIHLAAHGYPQPSVTWKKDGVDVTYSSRIKLLKDGSIQFSPVKADDNGTYTY

TVSQFQGTNIKTGTIKVKVFDEAKITQKPNPASRSLTEGYNTTFHIKATGFPKPEITWWD

ETSKKQLDPFYQEHFIFSPEGSWTIIGIKTSDKGRYSCRATNDAGNDITYVEITYVNVAA

KIASSVADVEKPVGEKAELTCSTEKGDPTPTVRWLQNNQPYISQKFNSVKSVSVITFDKV

RLIDAGEFVCEARNRAVNEKGDQIVVRKAVRLNVVSKPVFNEKAAANVVYSFVGNSVPVT

VRCVFLGYPAPDVKLNAPNGTVLARGNYSASIKVTTVSPSDFANFTCEASNTLGSDTTGV

QLKQAVAPSVPRNVLYEKTCKKITLKWTVPASDGGMPLIGYVISSDLKTEEVPATADNME

HELAGEFKPDTPHNIKIFARSSADQGKSVVTSVRTNKYCVPSKPVITNKVTKVETNELTL

KWEAPAYDGGDPKITYKVEWNEIPGKPKVKEGIKELEVKLTDLKYDTDHVIKLYAVNQQG

PSKPTIKQFKVKPKSVLPQCPEETKDGVHWSSTVQGSADAKPCPAPANGNAQRSCLQMDG

GQHAVWGATNFVNCTTKQFVELEKEVKALVDGVQANRSASEILDILVNMTAPVQSSHSEA

GELYGGDLKLSVTILARLSEFNSGKGNGSLSDQQSQAKFILSASNLLGENNAKPWLQLDK

EGSDSATLLVSTLDEFGASVAETLDSEGNNSYSVIEKPNIIMRLDKVGGKNRIKTEGLHF

TRGNNKISLPPEVFRPNDSSRVASFIYLTLDSFLAFERPGGQKSVFADSTIVSSTVRPIP

PNKLGSPVRINLEKKERQLPPNTTPQRSCVFWRVGLPKAWRTDGCRLVPSASNDVIACEC

DHLTMFASLMDPHGTKNPRVLEFISLVGCSISTLAVLLTVSVTLFLWKYLKKPRTQTEVA

LNVCVAIGATCILVIIEQWARDHQTGCTVVAVLLHYFLLAMFCWMLCEGILLYIAVMKMT

VGGVQNTPKYFYAIGWGTPAIIVAVSLGATQTSGYGTAKMCWLSTDSEGLIWAVITPAAA

VILVNTVIFVLVHRQRTSTKAFQYQDQVTRIRSSMRASAVMLPLLGITWAFGVLSFNRDT

LVFKYVFTVLNSLQGLMIFISHCVLNAKIHEAIKSWRAVHNHDLGEQQLTTGIHDLKTSK

VQDHHNMKLVDGEESRVTKL*

>TRINITY_DN581_c0_g1_i1.p1

QRSNSVHGREMTASITQKSVFATLPRMVRGHSTVLKGDPKGKNFLYTNGNSVIIRDIENP

AISDVYTQHAKEATVAAYAPSGFYIASGDVSGKLRIWDTTQKEHLLKYEYQSLSGRIKDI

AWSPDSKRVVVVGEGREQFANVFLWDSGSSVGKITGHTANINSVDWKQTRPYRICTGSED

SDVGFYEGPPFKYHHLNKSHTNFVNCVRYAPDGELFASGGADGQVFLYNGKTGEETCALG

GGKAHKGGLYAMSWSPDSKFLLTASGDKTAKLWDIEANAAVTQFTFGQNIEDQQLACLWQ

GDYMLTVSLSGNINYLDRNNPDKPLRIVKGHNKNILSLAVSEDRSKILTGSFDGRINSWD

PSTGTAETFTGQGHQNQVTAMGVSGDQLVTCSMDDTVRYTSLETLEYGTSGVGLNSMPKG

IGVGRDGLAIVPCINEIAVVRNGAVVSTLKVDYEPCSAAVHPGQTEAAVGGGTDGKLHIF

TLDNDTLTEKTTISMTCEAVLDVAYSPDGAYVGCCTNARGVFAYHTTDYKLLTDEWSGHN

SRVNCVAWSPDSRHLASGSLDTNLFSWSVENPKKKKNTVRAAHPQCNITGVAWLDNNTLV

SVAHDCCLKIWDVVHHQ*

>TRINITY_DN5847_c0_g1_i7.p1

LELDYLDLAESAALRMNQGTPYPPAGPAAGYQAAPQAGYPGQPQVGFAPQQYAGAPPQQQ

GYPPQQQGFPPQQQGYPPQQQGYPPQQQGYGAVAQPGGYVGQQQGMPQQAPAPSAPPPDM

FATLPGYEDVKYGSSYAPPPPPYVPPPQQQHPEEVFKQATAITEDQARSAMQSFVAEHCC

YGKAPADDMEIRNILPSSAYHYSLSTFCESRSTAWSYEPFHGQPIDGPHNGPAPLPWDIV

VHPPNLFKTSEQKVEVPHTASVKPCHECLGVGKKQCPKCTGRGRVSCVHCHGKGRRTVYE

EGTQQERQCTFCHGDGRTTCQTCHADGRVTCKNCGGHGQLKTFIQLTIKWINHEANHVVE

RTDLPDELIVNSQGTEIFSQELPRVWPISTFHDREINVASKRLTDEHGNAWPSERILMQR

HQLRAVPVSEVHYEWKDQSSRFWVYGHDRKVHAPDYPQQCCCGCVII*

>TRINITY_DN59275_c0_g1_i1.p1

GQSAVPSGNSDKMSHLMKLNTGALIPAVGLGTWKSQKGEVGKAVKIALASGYRHIDCAHV

YQNEAEIGQAMKEVFSEGKIKREEVFITSKLWNNMHAPDDVLEACQITLKNLQLDYLDLY

LIHLPLAFKKDSGMVRCIADGVIGYSPEAMQKTWKAMENLVDKGLCKAIGISNFTTKKIS

SLLEAARIVPACNQVEMHPYLPQPKLKEFCESKGILITAYSPLGSPDRPYDNKEAEPVVM

NEPVLKKIAEKHNCSTALVALAWGIKRGTPVLPKAVSEGHIKENLTAQDLSLDAEDMAAI

DGIGIHHRYLKQHWMFKPE

>TRINITY_DN6046_c0_g1_i1.p1

GVNSGTTRCPLHCSSLRPERSVRMKSLLVGSLVLLSIHFCFGEECTKEGFLNKCAQLVDL

IDKFADLDKRVEELEQPKATSCKELYDRGEREDKAYELHVGSKTVSVYCHMSAIVNCGSG

GFTLVMKTDGNKPTFKYDSVLWTNDESYNLAAGATGFDRRETKLPTYSSTSFNKVCIGMN

DRGRNRFISVTVSAHSLHDLIAPGEYHKTSLGRNAWKSLLASPSLQRNCNMEGFNVKPPT

SLKARIGIISNQENNCNTCDSFVAIGSNGAQTTGNLAAWSPDNGNRKTATIGYVLVQ*

>TRINITY_DN621_c0_g1_i1.p1

LLLLLLLLLLLLLLLLLLLPLPLSSSLVHSFPEPSCVRKLCPQMKPSRHYNETGPHNGIT

DSTTAHRVNNADIVLHWDSSSLHPKLDWNRYRVEWRFDSNAEFNCAILPKDRTTLVLPDE

PNKPPRVEVRLDILPLPNNYDNFWPVSLKIKGSGSPKPSTTKPATSPAKVITTPGSTSSN

NNTKPSPKPSTTKPTPSAKYRRSSPGSTSSSNNTKPSPKPSTTKPTTPAKYRRSSPEGTN

LALAIGLVFTLLAVVVMVLCFCWFRCHKSAL

>TRINITY_DN64148_c0_g1_i2.p1

MPAISEYVTFKVARKLYESNVISRGTFASFKKGFEDVIKCLQKTATGDVNWDAVRDLFDF

RDYIDVIPMNAANLCPSIHAIQLCVNEMGIDMNRDVSIQKRTSVYANIIDDARALIAQQL

NIGTDELAFMRNTTEANNIINNGLDFNAGDEVVIWKENHGTNNRAWEIRKQRYQNFNIVV

VDTTGATTAQELIDKFTASVKPGVTRVVTFSEISNESGLRLPSKDLCAAIHEIDSNVHVH

VDGAQGWGTLQHDLRDMGCDSYSASAHKWYVGPKEAGILYMKLARITNFWPNNFGYDAKI

IIPDELYTDARRFETLGQRNDPTLMSLLYTAEILGNIGFGEIDLRIQALVQRLMDGLVAM

GYTLTTPRDPTLRHGVVVVHFDNPDEGVDLYNWLYDEKSIGVASTGGLRICPHIYNTEEH

IDLILAAIQEYNSLPASAKSHASVKASKKVAKRKK*

>TRINITY_DN64341_c0_g1_i1.p1

AELHSAPTLISAEQLHTSSQLDRQRDIGRLPAAVEVQEMFVKGNPVSLKASASSLCNNIA

ILNSKERQTTTYAIVHKAFVCLSTVAKGAVNATHKQVSCKGEGALANSSVLQAKWCELPE

RTVFVITSVKGVQMFEPDGSIMIFWQSLGSTPDGAYSTFARGICTVGDRYICVGTSEGGI

MVFDIPARGTAVKLQDTLQAHQCAIADLAAKDSRMLSSDEQGNIIFWKAGGSFTQVMKIE

GYGFPCSSLCFYGDLVIGGYGTGHIRIFDGQTGKIRIEVCAHARWINAIDVAQDTGLLVS

VAEDSFVRAWKLSGGESPTIEIKFQEHVQDSQLCGVKFLNATGSSFGVTASDMGEVILFS

KQ*

>TRINITY_DN64428_c0_g1_i2.p1

MNPLVAAIRSGDLEAVKSKFRRPGTDANGPIQGGRSAIHIAVDSGKLEIAKFLVSKGADV

NLQDQDDCTPLLYALMKDNKPMVEYLLQMGADKNLEDPDGRPVYESAQSEGIKKLLSEY*

>TRINITY_DN6629_c0_g1_i2.p1

MASGKYTLTPEEIEDIREQFSEFDVNKDGHISSEEIGSLLMSLGEDLPGYKIRELINEVD

KDENGMVEFNEFLEMYRTTTKKKEGAGLLKFVKKQEGLKKLGGTSEGSADGTTHTFSDEE

KVAFVDWINSALGEDPDVKGLLPISTEGDDLFTKLGDGIILCKMINLSAPDTIDERVINK

KKLNLYLAHENLTLALNSAQAIGCYIVNIGAEDLHKGKAHLALGLLWQVIRIGLFAKITL

SNVPGLARLLMEGETLADLNKLSPEEILLRWFNYHLERAGSNRRVKNFSDDIKDSECYMI

LLNQIAPKGTNLDPTGSVVNLSDKNKRAEKMLYNADKLNCRKFVRAKDVVQGNPKLNMAF

VANLFNNYPGLPPMDEDELDQEEMEPYEETREDLSFRNWMNSMGVDPYVNNIYTDTCNGL

ILIQLFDIIKPGIVDWNKVNRPPFKKMGGKMKQIENCNYAIELGKQMKFSQVAIGGKDIH

DGIKTLTLAVVWQMMRAYTLKVLNELQPGIKDQDIVEWVNEKLAGAGKKSRITSFKDPSI

CSGHAVIDLIDAVKSGAVDYSLVTPGETDEEKLLNARYALSMARKVGAHIYALPEDMVEV

TPKMVMTIFACIMSFASSANSA*

>TRINITY_DN6658_c0_g1_i1.p1

MYTHGGKTNGKAGMYNQRRPNFSSRNPRTDAHQPWAAVGAWFLGPRAENGDLFMKLASKA

VLDQIAFRKSYYPADPVYVTDELKNGQTYTNTVKKMEKQLVGLTQQLQRSVPFFSSRYKG

HVNWDTLMPANLGYMTAMLYNPNNCAAEASPVTTQYELEVGQGLCKMLGYDDRSTGHLVT

GGSLANIEGVWAARNLKYYALGLQEAALKEPRLKAAQEYPVYIPSLQRNVPLAKATAWQL

LNLNIDPDVVEMPDKVLKWINEKGSGDELTDTDLKDILTGYAYETVGTQEFCRRHNLKKP

ACFLTPSTCHVSFVKAATILGLGKENIDLVPVDDRARMNTEELRKILEKKLAHEIPVICV

VAVMGTTEESSIDPLTSIVKIREDMRKKGLNFAIHADGAWGGYFASMLRDPPKNHHMGNP

TAVGFVPEMLLSEYVHREIAAFHECDTITIDPHKSGFCPYPAGAICYKDERMNNFLNITG

SVLYYHGDVNLGDVGIEGSKPGAAAAGVMS

>TRINITY_DN68789_c0_g1_i1.p1

MAEQSREELVKKAKFAEQAERYQDMSEAMKKLVESSKKEETLSSEERNLLSVAFKNVVGA

RRASWRVISSLLQKNPEPVAEGYLKEIKAELDKICEEVLDLLDKYLIPSTHSSDNAESAV

FYNKMKGDYLRYLAEVENSDKKAEHIKKSKEAYDEASKTAEEKMPPTHPIRLGLALNFSV

FYYEVDNNQKRACELAKKAFDDAIAELDQLQEDAYKDSTLIMQLLRDNLTLWTADAGDDD

NDN*

>TRINITY_DN6910_c0_g1_i2.p1

DFDRDLCGFQQRKDDNFDFTRRSGKTPSSGTGPSEDHTSGKGSYVYIETSSPRRQGDKAK

LAKQLSLSEQSCLYFYYHMYGSSTGTLKVTAGGKDVFIRTGNQGNKWMKAEVRLAASGPI

ELIFEAVRGSNYRGDIALDDVSITSCGGPTPPPNTPAPPTGAPPPPGSCGVRPNTRIVGG

VPAKHGDWPWQAMLMSSSKRQFCGGTLVAPQWVVTATHCVDRKSASSVFVRLGAHKRTSQ

VGTEQDFRVAKVITHPSYHKPKRYSHDIALLKLEKPAQMNRYVNLACLPQAVAAPGDGVK

CWITGWGRLASGGATPNILQQVSVPATSHARCEKSYPGKIHDSMICAGLDQGGIDSCQGD

SGGPMVCETGGRY

>TRINITY_DN691_c0_g1_i3.p1

MASREWKNLAFEIYEESFGKYELIRRQEEADKHPPQATVGQSLEKSLVNLKSHFKTYNGD

GSVGIGASGLATVVKDPQFPPNELFAPGRCFPVHLRHANFKASDDAAMDVRTAALKLGKD

DSSCLLDLVFHTGEEAPFWNIDSFEKLMDAHRNGPEDYKEYVQSDPWRYFIAVSTSRRAP

ASFTDQRYYSWLVYDFKADDGVKRHAKFRLVPDDSRPETGLLTENDQRSVWMQFRSAEER

RPQNYLSEEFVGALNKGPVKYKLQMQLHEATADQSHLILHPGRAWDPQHHPWLDVADVSI

TTALPTEVTQQCWEQVLYSHNAVRASMEPRTIYEYGLPGRALLHMHGGLKAGAPRSEAEP

LFPTRKYFVRVETGKRHGSGTDANVSITITGTRCRTDAIKLDRFLINDFEAETTCEYKVE

GPDVGEILMIKLHNDQSSRFSDWFVSRVHITTENPVKVYQFPAYRWVLTELTLFTGQALT

SAASQHETIKNQRRFEIQHHQELIQWGDDPAYSVDLPGFIEADSPGSLLKDLQFTDEATG

KLHSARRRGALNLGLGALFNVFNSWDEFEDYRTIFTPLVGDVPVAADRWQDDSWYGSHFL

NGCNPDTLRKCDKIPDNFPVTQEMVGGLLDRNVNLAKAVKEGRVYIVDNKILEDIPHFGH

EDPDVKRRYTSASMGLFYVRNDGDLVPIAIQLHQEPSDTNPIWTPKDSEHDWLYAKMWLR

NADSQYHQMITHLMRTHLYMEPVSVASWRQLSTLHPVWKLLCPHMRGIFAINTLGRGVLI

APGGVADVTLSIGGGGHVALMQKYYRSMTWDSYDLPKMLKQRGVDNAQKLPRFYYRDDAM

LLWNAISEYVKEIIFLYYESNEALKKDHEIQNWAQDLSQNGYKAGSDGIDKHTPRSFEDR

QSLINFLTKIIFTSSCQHAAVNFSQMDTFSFAPNSPTILRQPPPQKKGETTLQHIMDSLP

TRHQTALVVATVYDLTRIYPTEKFLGNFSESLFTDTKANDVIMRFGENLRKVSAAINKRN

EGLEVPYRYLLPERVPNSIAI*

>TRINITY_DN691_c0_g3_i1.p1

MAAKYKITIRTGDRYGAGTDATVSIIIIGTHGQTKAKALDKWLHNDFEAGQRDEYTVKEQ

DVGTLLLIKLLNNGGGFFKKSSDWFVNSVIIRKVLPDSPEKVYQFPCFRWVSSELVVFEG

KALLARDEQHAVLQQGRIQEIQQRQEMYKWGDDPAYTVDLPGFINAKDPQSLPKDVQFTD

EATGTLHHAKRKALLNLGLGHLFGLFDKWDHFDDYRKCFTPLVGDVPPAADHWQDDVWYG

TQFLNGCNPDTIQRCTALPPHFPVTDDMVKGLLDNGTTLKQAMKAGRLYMVDYKILEDIP

HYGEKDPDVERRHTSASMGLFYVRNSGKLVPIAIQLHQQPSDTNPIWTPKDSEYDWMFAK

LWLRNADTQWHQMITHLMRCHLMMEPLAVASWRQLPSPHPVWKILFPHIKGVMAINTLGR

GRLIAKGGVSDQTLSIGGGGHVMLMQKYYRSLTIDTYDLPKMLKKRGVNEADKLPHFYYR

DDAMKLWSVIRQFVDDILGIYYPSDNAVAQDAELQNWARDIRDNGYPSRSANSVDKGLPA

SYQSRESLAHFLTIAIFTSSCQHAAVNFSQMDTYGFHPNSPSLMRQPPPMKKGQVGLQQI

MDCLATKHQSCIVIATVFDLTRLYPTEKFLGDYSEGLFTDEPALRAISRFQENLKTISAE

ITERNKGLDIPYIYLLPERIPNSIAI*

>TRINITY_DN69992_c0_g1_i1.p1

MLESQGCSKAPHASTRLRTIPPSLPRNQCVQKARCRLQRFKMALAGGDTIFGKIIRREIP

ADILYEDEQCLAFKDINPQAPVHFLVIPKKPIAQLSKSEDADEQLLGHLMIVARKVAAQE

NLTEGFRVVINDGPKGGQEVYHIHLHVIGGRQMTWPPG*

>TRINITY_DN70842_c0_g1_i1.p1

PTRCQKCNYSGNIDLNAIGNCNTQTGECLKCIHDTRNGPLERCEECAVGFYGNATDYPKP

QCKACECYSPGTQTPVGHNPRDPLPCDDRGVCQCLPFVT

>TRINITY_DN71749_c0_g1_i1.p1

EKICYQLWCQKSDYSCVTNFEPAAEGTKCDEGKWCRRGVCVPLGSEGPEAVDGQYSPWSP

WSGCSQTCGGGVRKRERSCDNPAPRFGGHLCQGESEEFQMCTTPDCPENAISPRQRQCSS

KNNMEFLDGMTYEWEYKATIARTESTACQLQCFAGVGPRQFVRFNFGDVQDGTLCDEFDE

NTGVCLAG

>TRINITY_DN71_c0_g1_i2.p1

MKGKNKLVPRLLGVTKESVLRVDEKTKEVMKTWPLTTVRRWAASPNSFTLDFGDYVESYY

SVQTNEGEKISQLIAGYIDIILRKRKGEDGYDPDFDEESTMVEDSVTPSKGTYLERQHNK

VGHSSSGSVALPAVVRSSGQAASRYSVGKMEPAQYGMTTGSAHSAHRPPMGSQGRHHNLS

PAQQAYMSSLSQGLDSIVSADQELSVAGDVPALGSDPASLQWKQNTLDISRLTVASRLAA

LSASCASIVTLTSGDPEETNYTAVGAAVNTITANLHDLSKGIKMIAGLMDEGPDGSNLLD

AARGLANAFSDLLKAAQEGAGGNKDSRGRLLSAAGNVGTTGARVLQYMGDADVDSQTQEM

LLALAQAVANATAALVLKAKNVASQCPDTANQNRVISAARDTAMTTSQLVACVKIVVPSI

SSHLCQDQVVEASKLVAQAVDDTEGACKDALPDDPDMMNDLLAAAQAVRDTLNDLLQKVR

DGGRGGQQTGQYDDTCDSILGATDRLFKSMGNAGEMVKQAKILALATSSLVSGIKSEAED

GEDSDLQKRLLSAAKLLADATAKLVEAAKGAAKNPNDPAEQQRLKQAAEDLQSATNVAAS

DALKKKLIKRLEANAKEAVASSTQLVAAAQGAAPSNRNQASQQQLNDQCKPVNEHREQLL

KAIRDSNQNPDSPEAQLALISVSKQFIQPTSKLVAHAKAALPTIGDPSAALQLGNFAKST

AVSLGELRDAADKAAESCGTLEVESALDSVKKLGKELEAIEKSAEEGNLLLLPGETAESC

ALDLGATSKTVGSSMAQLLTAAAQGHENHTGIAARDTASALKVLVSAARGVAAAAEDENG

WRDVIKAAQAVIAESAKLIEEAKTALGRPGDPGNQQKLAQVAKGVSNALNNCVNCLPGQR

DVDEALKAVNNSNQVLDEGNFPPTTEGYQVVQDKLSMDSAALNAAASDMVTASRGPTNQL

AATSKKFSHSYQDLLDSGMKLAGQTSDDETKGSLVRNLKNTSTASSKLLLAAKSLVSDPN

APNAKNSLANAARAVTDSINVLLNACMSAAPGQKECDNALRNIQAVSNVLDNPVEPVNSD

TFFDCLEKVTDKSKELTEAMPKITSSLKTGDFNSFDDNIKDASFALCALTESAAQTAYLV

AVADPSSVAGRPGLIDQAQFLNSKQEVSDACGSLLDPHASQQKVLAAATSVAKHTSALCN

ACKAASAKTSNPAAKRQFVQSAKDVANNTANLVKHTKVLAGRMDDANREACAAAAKPLVE

SVDRLTAYALSPEFAPVPAKISTEARSAQVPLIMAGKSMATSGTNFFNAAKALAANNKEP

SGWQQLTQQAKAVADAMRRLITSIKDNAPGQRECEEALEKINHSINDLEQASLGAISQTL

QPRPENNLQGFQEQMMQNLSQVADIIDPLAEAAKAKPENIGHRVARMSTFIIPLTDSAVG

TASHIPDLRRKTDLLDQTKTVAESAAQLMYVTKACGGNPKATEIHPAVDEAALMMREAVS

DLTNTLEEAASESGLVTGLVDSIGKALSEIPVSDSVDSTALADEPFVNYQERMTRAMREL

TKKSQDMIGKSNTDTTKIGPLGKDISNLYSGIAKDAKGAVATVGNPEVGRRIRTGVQELG

EACIALVQSGGAVQSGPKDTYARRELADNGRNVSEKVSHLLAALQAGSRGTQACINAIST

VHGIVGDLETTVMFASTGTLTPETEGESFTDHREEILKTAKTLVEDTKKLVTAAQATQEV

LATAAQSAVGSVSRLADHVKFGAAALGSEDSDAQQMLLNAARDVASALGSLINATKNASG

KPSSDPAMEPLKATGKTMVSQVSLLLKTVKSVEDKAMRGTRALESSIEAVKQATLVLASP

TLPARKATPEELIRSTKSVTLATAKAVAAGNSCNQDEVINAANLGRNALSEMMIICKAAA

QTGDTEDVRVATIVTARDTGAAFGEMLELVQDIVQKPTHEKKLRLMPTSKKVADRVGKLV

KAAEALKGSDWVNPEDPNVIAESELLGAAAAIEAAARKLAELKPKPRPKAADESLNFEEQ

ILEAAKAITTATAALVKSAVAAQRELVRSGRIASASASGDDEGQWSQGLVSAARMVAAAT

TTLCEAANSAVQGNASEERLVAAAKQVANSTAQLLLACRVQSDANSAAQRNLQAAGNAVK

RAADSLVHAAKNAAIFEEEETTVIINQRFVGGIAQELEAQEEILRIEKELEIARSKLGKI

RQAKYRPEDDE*

>TRINITY_DN7231_c0_g1_i1.p1

PASRKASLDIRRCFDLSPKHCAKLLITFCSQSISSKMAQPKEVPDPLYDLIMDPQLARNE

YPKKKLDAARAAEHTCLAAKFCTQEIWDKYKDQVSTGPAKWTLARAINTGVMYPESFVGC

HAGDAESWDDFKDFFYPVIEAYHKGFSISEGNTLEGTPSERMDPAKISVELSESAKAKVI

STRIRVARNLTMFPLNPGGSTETRSEIVALMQKVYDDIPADSELKGELFLHATMSDEQRQ

GLIDDHFLFRGADKMQAASGYHVGWPIGRGIFHNKSKEFLNWINEGDHLRIISMRMGSDV

KGVFSLLSKGTKMIEDGVKKVTGSKEAFMMHPKFGAITCCPSNLGTGMRGSVHLRIPKLI

KAWGFKKIDVECRKRYCQARGSSGEHSEVVDRVGISNWRRIGLPEYVLVEDMIKCVNWIV

EEEDKLPNH*

>TRINITY_DN7247_c0_g1_i1.p1

PSELSPGQSVCTLLPENIALKMFSKTALRLQGIHGARIALRAFSCSSQRAYKVAVLGAAG

GIGQPMSLLLKQSPLITHLALYDIVNTPGVGADLSHINTPAKVTSHQGPDELKDAVEGCD

AVAIPAGVPRKPGMTRDDLFNTNASIVQNLAEACAKHCPRAILCIISNPVNSTVPIASEV

YKRAGVYDPARILGVTTLDIVRANAFVAEAKGLDVNEVSVPVIGGHSGVTILPLLSQASP

KCTFTDDETEKLTDRIQNAGTEVVNAKAGAGSATLSMAFAGMRFIASVLDGLSGKDGVVE

CAYVQSDVASTQYFASPIQLGKNGLEKNLGIGELSAYEKKKMEEVIPELEKNIKKGEDFI

AGK*

>TRINITY_DN728_c0_g1_i2.p1

MGAGDKSVRLIAHRFTAKLTRVHIDMASAIVEVIVEEAVEESVETAVEETVEESVEATVE

ESVEEAVENTVEQTVEDAVETSVEDAVENAVEDTVEDTVEQATSSTIKRRIIMAIAGLLV

GVLVIGPIIDLIKAKTGAGKKKCKLDAETSSEMDKTTNVLDVLQKLVKSWAAQLKTYKQD

ASLGQVEDKGKKADAAGTVYTLFTDMKDKLNAASRIASECAENCEWKANIQQFRLDVILA

AYNVQGIFLAKDKAPVMKEKNFPPEADRKTMTDAFNANYSTKWVNFIKFEAKKNLTKAVQ

AQAKAASKAAVKNVISGPMKTQVKAGMEKQVVPDVKSQAMSAAKAQVTDVMNRYNSAINK

HAAIPIYGIATLKSWMETNVKPTAVKEATEKAKAAANATLELPPAQMSIMTIQSNASHDV

LSKYSAQIKEAANKAADDAIQKALEKAQDKDKN*

>TRINITY_DN72_c0_g1_i10.p1

MWSYLVPFLLAFCASAKHVSPRDHVSPFTRTEKPRSSLESGDIVEGDIRLNEDLASYYRG

ETRNAMVNVKLWPNGVVPYVLDASVDDHLKQQILIGIEEYTKYTCIKIVPRTTERDYIRI

VKPASGCNSMVGVMGGEQILNMGPGCEYVGLVLHEFGHAIGYFHEHNRPDRDDTVRILWE

NIQSGFDDAFRKYTFEEADTQGFPYDLTSIMHYENGAFSGGYCRPTMLVKADPSYEVRPV

FKRKFSPQDIKKINKLYGCQTTLLPPEVLPGTNNPDPSQCPCEDLYDKCQEWKEMGECGN

NLSWMSNNCPKSCRTCGEPPSDCQDLYPVACETWGKAECEKNAMWMSDNCQKTCDTCIVD

PSECKDRFQSCATWKDNGHCSETFQWMNKYCSKSCRVCGEPDSDCQDTYPVACDDWGKKG

ECEINPNWMNVNCKKTCKACSGGGGGATQPPVATTQPPPPPTDGSTRPPVVTTRRPSTSG

CGGSTNSPQVATTQPGDCKDVYPQYCPDYKKQGMCETHPEYTKEVCKYTCDYCGVGGPTT

QPPNCKDVYPQYCPDYKKQGMCQTHPDYTKEVCKYTCDYC*

>TRINITY_DN73019_c0_g1_i6.p1

PRPPRMWPFFAAGHPAFFLFWSIKMPGGVTVKDADPHQLVKAMAAFLKKSGKLKVPDWVD

LVKTAKHKELAPYDPDWYYIRAASILRHIYLRNGVGVGALTKVYGGRKRRGARPCHFEKG

SSSIARFILKSLEQLKMVETVSSGGRIITSQGRRDMDRIAGQVKFRSTDTVNVICHS*

>TRINITY_DN7344_c0_g1_i10.p1

EKERKRREQEEEEKERKRREREEGERKKREEEEEKEKARNSRRLRREASKEEEEPVESGR

RAHRRQRQRSEENLEATSGEPSRSEEEPNLTKTDGRSEKSSEAKEEDEYVSSVAARRAER

RRKREARQKAEADEAKEDAPTNVEVSKTEEKPVEVSKPTVPYEDKSPSARRAERRERRRS

SSKATTESNMAPEPAKPEVAEPAEPEPASSYTASIKARLEGRPDRDSGGSRSRVRSAASS

SASDEEKRDSAELKISVDSSVKPKETTPSEAKNGERDIEMKKATSTDKDEGDGAKMSRVR

AEPRGARDVASKFEKKTETKDETKKPAPKFGRGFVAPQVEKCEVCKKTVYPMEKLSADKK

IFHKTCFKCTECKATLRLGNYAALQGNIYCKPHFKQLFKVKGNYDEGFGREQHKTQWSKK

QGERTVNGSA*

>TRINITY_DN736_c0_g2_i1.p1

FLSCENHAQCVLTADLSARCTCLTKSECPNTRNPVCGSDGVTYGNECHLKVEACTKGTPL

TVVERKICDPCSPIKCKSFEQCEVRNGQPVCVCPRDCASIGNAVCGSDGTTYRSICHMYY

KACELKTEISVVKNGPCDLCAAKTCTGYRKCVIRAGGRAECVCPTMRECKFGAGYPRVCG

TDGRTYP

>TRINITY_DN7430_c0_g1_i2.p1

KRQRKRVLHANEELYFSRPAHWKRPKSRVMENQAVPLCLPNNCSWDPLTGEYSQEEDQDR

KTLWVVDEALNRLRQIKGPVCVVSIAGPCRKGKSYILSKAFDQGEVFPLGHSLDPETMGI

WLWIVPQKYKDSNGREFTVVLLDSEGIDAVSSESSDDHRIFTLTVLLASVLIYNSAGVPT

RKDLEGLDFIVQLSKRVRMGSAEDNPMEDDVKYLHKTFPFFIWLLRDVVLQIPKSCSDIT

DYFMKRVFKAPKAQTGASGADDAQQAAESIMKFFPGFHAFKLPPPSADPKVAQNMNSAES

SVNQEFLKGVAEFSKSLKERLSLKRSFNDGELVTGEALAAMAELYIAALNTPGTVPNIKS

TWEIFVQNKCTEATKAALDLYGDIFTSHVKDLLPCDSDDLRRIHQDALERSLELFKEETR

GILAAHVDKYLTDWKDKAEKNLSDWQEKNDKETEDFCNHLLQSLKKQHLEPVLAKLIGPD

GAKMTFAAIIEAYSAIETGFKNKARGARDVCARTFFNFHPELKAEMEKHVDHLQQLKDYD

EQLAQQRAARAAEEEARRRMEEENKRLEQERKRKEEEMELLKEKQEEDRRRLEEQFDETL

RSQKDQMENMMKANMEQMKEDREQMLSQNKTLEEALERMNDSMASRNAEIQQLQDQIRLL

ASRPPPKQGSCVIL*

>TRINITY_DN7438_c0_g1_i3.p1

MIEVTVGQYDDMKDGEMKTVDLGDQGKALLVREGGAYSAVGHKCTHFGAPLAKGDLCDGR

VRCPWHGACFDIKTGDIEDFPGLDSLPKFEVVIKNDNVIVRAQLDQLKSHKRVKKMTKAD

TTYDKRVFVIIGGGGSAMKAAETLREEGFKGRVVMVTKEDCAPYDRTILSKKMTATAEDL

KLRSVEYLSDHDIEFISGIEAVGLDKDKKTVKLSNGDSLGFDSILIATGGKPRTLDVPGA

SLENVLLLRSPDDANKIASLAPGKNAVVIGNSFIGMEVAAFLSDKASSVTVVGRTDVPFT

AVLGEQVGSVLKKNHENKGVKFLTRNTKEFKGQDGKLCAIVFDDGTEVPADLCVLGVGVT

AATDFLKGSGLPLSSRGHILVDEYLNACEGVYAAGDIATFPLKMLKGETVTIGHWQLALK

HGLTAARNMLGRKEPADTVPFFWTMQFGKSVRYAGHAHSFDDVIIDGSLEEQKFVAYYVK

GNAVLAVATMGRDPVAASAANRLFAGNMPTAKEIRANPCAWLEE*

>TRINITY_DN746_c0_g1_i1.p1

MALARPVYIVAAKRTAFGAFGGKFKNVTATALGEHAAVAALAAGKVDPAVVDSVIFGNVI

QSACDAAYVSRHVGLRAKVPISATALTVNRLCGSGFQAIVSAAQEIQLGESSVVLAGGTE

NMSQAPYALREARFGTKLGTDLKLEDTLWQGLTDFHAKLPMGITAENLAEKFGITRQDCD

DFSLLSQQRWAKAQEAGHFKEEIVPVTVKGRKGPEEFSVDEHPKPDTKIEGLAKLPPVFK

KDGVVTAGSASGICDGAAALVLASEKAVKDHSLTPLARLVSYSVAGVDPTIMGIGPVPAV

KAALEKAGKTLDDMERIEVNEAFAAQFLAVQKDLNLDMDRTNVNGGAISLGHPVGTSGAR

ITAHLVHELQRIGGQFAVGSACIGGGQGIAVILENMK*

>TRINITY_DN7472_c0_g1_i10.p1

MAIWKAICITLFVLEACSLFGSGHETTQRNSCKKVLRKVASSVSTSQIGDVQKVRYEVCA

DEGGVIYYCPGDEICCTPGDPASKCCPADHPLCVPPEYCCPKGYPKVCGIYCCEEESFCC

NEAICCETEGDCCGAQCCEEGDLCCNGESCCDSADACCGAQCCPDEAPCCTQGGTSKCCD

KDTMGCCDGYGCVAPCPSQFDAIGCQLSSLSLDDEVLEASSALPDKLYRILRPDENPEGI

IAKDPGATKKVLSHVNCGSRPNYASQYISTSASIDVAKDYKQKGEKKGLTGLRICEFDVD

KLPQTCEIVDLTTEENRDKYLGNAVCKNYAKASAEVLLQCDVPIPCTVIDPPPKHEGKTF

SDTRQEL*

>TRINITY_DN7473_c0_g1_i1.p1

MAEVVFPLTKYTNKLALENKISSIPDKLRWQTRTDRALRAVEKEIFTQSGGDRPDRPHFL

FLFTDGKPTGQKHADFEPISNIMSRLEAEGVHVIIIGYGKGINNDALEDMAQGSAHFTYV

ANVTELRANIDVIVSTACVISVNGGYTHWSNWGECSAICGGGFRNRSRTCTNPPPKNGGK

SCDFLGSAEEKESCDGGYSSWSDWGECNSLCGGGYRSRTRTCTNPSPKKGGKNCQDLGSA

EEREACNEESCEN*

>TRINITY_DN755_c1_g2_i1.p1

MADPEQPVAQAQGDDDVEATPGYQPPAQKSLEEIQNLDADDESLVKYKQQLLGQAGDVLD

EGGSNVLVKKLTFVPLEEGRAETEMDLTGDLKDLKSKVFSIKEGSGYRLKVAFRVQREIV

AGLRYFHSIHRKGIRVDKSSFMVGSYGPKTEAHEFLTPPDEAPSGMLARGQYTVKSKFLD

DDKNSILEWEWSFNIKKDWE*

>TRINITY_DN756_c0_g1_i5.p2

MAEAAGRRVVLPIDNSKHSEDAFDWFIKNMYKSTDYVILFHVTELVHSGKIETEEDFKKH

VDEHETKVKALEEKYHQKMKDIKGEIKLGGGKPGEAICKELKEENAGLVVMGSRGNNALR

RTIMGSVSDYVLHHAHIPVIICPKHHH*

>TRINITY_DN7617_c0_g2_i2.p1

EYVRTFYLKYGNNGLDFNAYGQNATVKYKVLSGSRNADDVANVKLSEPIFARYVRIYPLT

WNANICLRTEFYGCAFQGSSQDCVGFGWEKGPDNACYQFNTDQSKLWADARAACLARGGD

LLSVTSAKESSFITGRLTPLSSAVHSFWLGLNDRDKNTRFYWSDGSPIRFTAWDAGNPTD

RANQKACVEILAGTGKWRDVSCGFYRPFICKKVLGSRYGDKLPITSYWISGTNKYWPLNE

IVDGKLLGSSPAPVTGQILNVDVIQSLHAVLRFQASRSYAKVSGQLDCTGNPDLCNNGLT

VGIITKFDSSASSWSGNTFVVDSISNDK

>TRINITY_DN775_c0_g2_i2.p1

MFSMRKSGRGQKGGAASHDDDGILVKYEDHQRILPFTKDDQVASLRHHFLRVFSDVLEDQ

VAPAQVRFQRYHNGVQDYVDVFEDTKLETGDKLNVIVKRCGEDKKSREKWWPSSWWPRCA

YVPFLVCPGRTCLVGTGPPEKPYIIANNTPYRLWSPSGRTGGALLVRNPGTDVVSCSGVF

DDPSQAINTVVKTCEVIKRGEPILYGLIFNDSAQKRYATQANGVGANITAVELNANDDLS

DEQLFEPDYYWGYTMFKSFKYNTLYLGCDDNGQAALLNVGSPFNPNPQTLFIVNEYKVDT

PPVEA*

>TRINITY_DN78875_c0_g1_i1.p2

MAPAAEAMARALAAVALKAPRVTLYANVAAAPVSDPEAIRTALVEQVTGTVRWRESVAAM

AATGVDRFYELGAGKVLTGLVKRIAPQASATAVGTPADVAAFAL*

>TRINITY_DN8071_c0_g1_i2.p1

MTGGDGDLVFRATGFEDLKETLDDIIKTACPVDGQWSPWSPWTECTASCAGGLQRRNRTC

NNPPPSGGGANCTGPAEETQACNEDPCPIDGNWGEWNPWQDCSADCGGGVRTRFRICDNP

PPSNGGARCVGISEDIENCNEDPCPIDGNWSPWKPWEPCSVTCGDGQQSRSRTCDNPAPQ

FGGADCVGDPGQIQPCNEGPCPIDGNWSPWKPWEPCSVTCGDGQQSRSRTCDNPAPQFGG

ADCVGDPSQTQPCNEGPCPIDGGWSPWKPWEACSVTCGGGEQKRTRACDSPEPQNGGAPC

DGPAEETQ

>TRINITY_DN8091_c0_g1_i1.p1

EKTVVPPAMKISILLLLAGLAAVNAENYVRVCYYTNWSQYRPAGAKFFPESVDPHLCTHL

AYAFAKINQANKLAMYEWNDDKMYVRFNDLKKQNPGLKTLLAVGGWNHENANSPFSRMVK

TAASRKVFIDSSIAMLREYAFDGLDLDWEYPAVRGGSPAGDKQKFTVLCQELLEAFNQEA

AQTGKPRLLLTAAVSAGKKTIDKAYEVDKIAKYLDLLNLMTYDLHGSWDSETGHHTALVG

PPKDTLTVSFAVQYWIDKGFPANKIALGMATYGRSLGLVDPANNGLGAPAKKDWSNPPKG

KYTREQGFLSYYEICMKSLTVVRENAVKAPYGYQGKEWVGFDDKYSLKLKVDLIKEKGLA

GGMFWALPLDDFKGTFCGEGKYPLMNAVKQYLGGYVPPPPPTGATAAPTDAPTGPVNPPT

QRPEPPTQAPTNPPSGSCVAVPPYDQYPGMDAWCVSNCASGNCPASHCKCS*

>TRINITY_DN8151_c0_g1_i2.p1

MAEDWKSNPDVMKIYVGQLNPDSSQEAVMAYFGQFGTIQECNLITDKESAKSKGFGFITF

STPEEVDELLEKTHNLDGKTLQVRRAIPRDDPNPLAHVRTKKLFVGGLNEEASEEDIKAV

LEPMANAVVESVKLMFDRNTKKFKGYAFATFSSDHPVDKLFIIRHAVIKNKRVELKKAED

LSGGASSVRGGRGGRGGGRGGGRGRGMGGGGGGGGGYSSGNYGGYQRPYSGGYEGYEAYG

SGGYDYGYSEDYNGYGSYGGGYGSMGTYGSDPSGYGPSPRGRGSGRGRGGNYKPY*

>TRINITY_DN8347_c0_g1_i3.p2

MPMARTRDRGIIWLCAAAFLVSMLPSSAVAEGGGEAEIDEEAKLTIECNKNYISVSFSLE

DYPKADTSTAHLANEACKPAVATNETVGFKFGLEDCGTQRSVSDDGKYVIYENKINVEMK

TLTPEDQTISRSHSVVFPFKCSYDKKALVTSGARDVDEIGEKPEVIGKIAFNPRSTEIIT

EAAGYGNFTYYMDMFKSDQYSEKEEYPAVKAIGQTLYLELKVESSDSKLQLFPDWCKATL

SADYSSDPSHMIMENT*

>TRINITY_DN8482_c0_g1_i1.p1

MPETYSWSIGLLNQHGKYLTLEKFGSSTLNVDGSSLRKKQIWTLEQEGETVYFRSHLKSY

LSADAKGNVTCKESEKHKDAQFTIEPQVNGKWAIKSVHNEYFSGNGDQLKCDAKTKELWI

VQLAMHPQINLKSCFRKRYAHLDIENDRLRVDELIPWGADATITLNFIDGKYALAASNNK

FLAGDGSLKESATEADGCLFSIEFHKNEVAFKGKDGRFLAVVGTGDLQLGKKTAAGKDEM

FEMEDSHPQVSFIGHNDRRVSVKQGVDVTANQRELTDTETFQMEFDKSGSGKVALRSSKD

GKYWEVSKDGGVTATAAEITPQSQFDLEQHGLHIAFKTASGKYLGGKSNGQLELKPSSEV

EESGKYILELINRPILVLRGEFGFVGMKGTSNLECNRATYDVFQVSPNEEKKGHYKIRTA

SGKYWHTAEDGSIVVDEAKADDFTFILPKHNHLCIKAPNGNFLKGSQNGLFTAKDSEMSK

NAFWEY*

>TRINITY_DN8513_c0_g2_i1.p1

MVRGSAKGDDIGKIFVGGLAPDTNEESLQEYFSQYGIVTDSVVMKDASTKRSRGFGFVTF

KEPESVQTALNDKPHVLGGKTIDPKPAVPRGPGQQGPPPPVRGGGGGGGGDGNELNKVFV

GGLPQNITEEGLVNFFSAVGKVVGSQLIYDKESGKMRGFGFVTFASPDSAKAAADTRFHH

INGKTV*

>TRINITY_DN8692_c0_g1_i1.p1

MLRAFLLVSALLVARGELVVDRGDPDSPCPPLRPSQVGPDVMVSPSACNSNVSVPSLTVC

EFKCPAGERVSGPPSKKCVDGGVWSTTHVPVTCQDINECRVENGGCSHDCVNTMGSYECT

CPDPLVLSDDKRNCRAMGLILNCGQDTMDVTIPKKALRDLQGDYLRLMDPSCKASENDTH

YSFSTALDGCGTQRRSTKDFIVYSNKVQEKPVEQSGLITRVGKDEFNIPICCYYLNNGII

TAVGYQANSSDLSLKEQGYGRFKVKLDFIKNDGLVRQESVYTQSDYPVEVLYRQRLMFEV

NIATLDQDLVVQTGNCCSTPTADHENAGRFRHELIHEGCPVDPTTRMEEPLAGQRQRFSV

EAFKFVGEFPFVYIHCSVIVCKKNDPDSRCAKGCVPGLNVNPPVSSDAGAGKFPARLKRA

ASDHVLHTYMLSRGPFALGSREDEPSDLGESRDDLDEGDEKEEKVEASQKEENNAAAWNP

LHSILLVVLAVSTVLSLVGLAYVRKTKRRARQPYQLVTS*

>TRINITY_DN880_c0_g1_i11.p1

MAEDDGGFIVRQTPGVFVSKMKVILAAVAFAGLIIIIIVLAAVLGHQNAKGRQGSTGTSE

GDKEASATPTAVGPTTPGKESWWQVRLPENVVPVHYDIVLRIDLKKLRFDGSVDILVRVT

QPTDLILVHTKDMNVTEASVTTADGGQNVDVKKRFWFEKNQFYVFIMDSTLRTGNYVVKM

KFEAFLATSMDGLYRSTYRSKNGETVTIAATQFQPTDARRAFPCFDEPALKATFTVTLAH

DRELISVSNMPIVKTEMKDGWQHDHFNETVVMPTYLLAFLVCDFGSKTTTTAQGTEMTYY

ATKDQVDQLDYAAGIGKVMMEYMEKHFGIPFPLPKCDMAAVPDFAAGAMENWGLILYRET

ALLYKPNVSSETNKQRVAAVIAHELAHMWFGNLVTMKWWDDLWLNEGFASFVEYLGVNRV

HPEWEMMNYFVTADLVSAFSLDGLKSSHPIKVSVSHPDEISEIFDSISYNKGASIIRMLR

YFLGENVFDRGLTRYLKKYKYSNAETDDLWRELREESCDQGKCVDVKQMMDTWTLQMNYP

VVMVKKEGGDYKVTQDRFLFDPESNFTSKYDSPFDYKWVVPFTYITKNSPDEEKSLVLDK

SSASFPDDGSTWVKGNVGQTGLYRVNYEDSNWEALRNQLTTAHEVFNISDRAALIDDAFD

LARGERINYTKALDMTTYLKGETKYIPWDAATSGLYTVRSYLPKTSTVYENMQKYLKFLS

KNLYQSLGFTDKGGHLEVYLRSTILGINCGSGNENCTNMAADFFKKWMEDPVKNPVPANF

RSLVYFYGIQSGGEKEWDFAFEQFTNTTVASERRKLLYAMSATQVPWLLSRYLNYVLDES

KIKGQDGTTVISYVANYNKGNGRQMAWDFVRLNWETLRQRYGGGFFAFRNLIYSVTSGFA

NDYRLQEVLAFKEAHKDLGTGARAMDQAIERIKAKIQWRKKNEATIDQWLKKFIKDNIKP

*

>TRINITY_DN8899_c0_g1_i2.p2

MGIITNCAVILALAVLSGWAASHPTIDMEGIRTTLRCYGLLYRLSIQEGMFQSDGGLNWT

TACAATQAFVDCFAEGSGTGFTLDANRVLNWQMCKANEVLKLCPEAQCDDLKKLARRTDY

WRNLPFPASDGMQVECGRALHRECNHMYIDSLANGKSMSAYYMCYVDGYKTCAARALAPL

TQTYREAVTEGSPINAMFKKLKEAFRNQLSAHA*

>TRINITY_DN8993_c0_g1_i1.p1

MIGGNKSAEDTGDDDAEASSVSGVNIVIANQLQSVPGYKSKKDYQLYLKGYIGRLKKKLT

EEGMTDRLAIFEKNLPKALKAEVFEGFSKKNFDVYVGTQTDAEVGMQCLLTYREEDDVPY

MLFFKDGLIEEKA*

>TRINITY_DN8_c0_g1_i10.p1

ERELPTVQELVGEIEGYCQRLRDLAVEPQNCMPDVVIWMICGDKRVAYYRVPAYDVLFST

TPEATGQLCGKTVELMLKYPGKKGQDIKEHPEVPGLVRLELWLGLQTHQHHWTAREKTEG

EFIVYAESYENEMKIIKWIGPKGPGSRPRFSDVTGDLELPLDKFHVPPGWKFSSDWQIKP

ELSLFCDSDTGHKKFLEEVFENQSRLFPGAEWGPAKEQWTDATGDGSASPDQMKPPSGWA

WIMQNWEVDKNRAVDGDGWEYSLNPSYGVYTPVEKAFHLTRRRRRVRERELKDPGASSAK

KQDQMRELMKEGWGYAPAFFMKFHMKEKKMDFVRRRRYLRELRPEGGKIDGKQCSLPPLL

RVQLKSKKAESAVCLLPRLFVAFKKPHKFQLWTYIYQARDLIAKDESGMNDAYARVAFEN

QSQTTEVLSQSLCPTWDQTLIFPQVDIYEDLQNINRSPPSVIVEVFDQDEMGKDDFLGRC

TLKPLVRLKGLELPEPTLLWHPIMRGDKFAGELLISSEMFLDEGAAIPHPPGARGGVYPV

ADRVRPVMQKKAVEILCWGVRNMKKFQLANVTSPVVEFEIGGNTFTSEKIEDSKKTPNFP

NPILQRQILVLPKEDMYAPPINIRVRDDRAFGRKPLVAITSLKSLKKFECKPEQEDENEL

QIDVQSPETPVAPQAPATGPGSPAPAKKPPEADKKAQAQQVDLFDWWSKFHASMSGREAT

ESKPGKKKAKKLLSLLSPGTKEADSRDHIQKYLDKGYDTLTIFDRELEKLDQFERLNDFI

GTYPLRRGKTKTKDDEDDSCVGEFKGSFRIYPVPDDQVDGSTLPETLFVNLPPSEPQECT

VRVYVVRGIELQPQDPSGLADPYLIVSLGKKKYDEQDNYKPNTLNPMFGKMFEFKAKIPV

AKDLKIKVMDYDLLSRDDVIGETTIDLEQRLLSRYHANCGLPKNYCTSGEHQWRDSEKPL

KILEKWCEHKGKKMRFFRSKSNSPGRIVIEDRVYTLEEFETEETILPPEKELGPSHQRLA

LHILRMQGLVPEHIETRSLYSPVQPEIEQGKLQLWVDVFPKSVGNPGFPVDIAPREASKY

ELRVIVWNTSGVVLEETSITGDQMSDIYVKGWIGGIDEKQKTDVHYRSLDGTGNFNWRMV

FPFEYLPIEKKLSVKKKKHFWSLDETEEKVPPKLIVQVWDNDTFSHDDFLGQKEIDLSKI

PKPCSDPDKCGTRRDPERHGEFVDLFVQKSIRGWWACWKEGVEKPQGKLEMTIELVTASQ

ASMKPAGLGQEEPNANPKLDPPNRPETSFLWFANPLKTLRYIIWRKYKWIILGLLLLLLL

VLFVALLLYAMPGYSIKKLFGV*

>TRINITY_DN90165_c0_g1_i1.p1

GGHIGTLNLYMKVIGQSETKLWSLGTDMGNTWQQAQVPVVSSGRSYQIIFEGIRGTDYQG

DIAIDDVTFTDTVGSCPLRPRSPSPVPFGCNFETGLCSWTQATDDKFDWSRNQGPTGSLQ

TGPGIDHTS

>TRINITY_DN9142_c0_g1_i1.p1

MKFALVSVFLLASFAVALSLKCYVCTNCDGNGQETTCAQGLDKCLKSYTKSGTSRSCSSD

GVCKLAQATCDTAKKLDSSAECEAPCCDTDLCNAGAVPSFSVLLVSLCSFVASIAFFK*

>TRINITY_DN9227_c0_g1_i1.p1

EILHRVCEQRGRGGSRLSLKMVYEKVSKQNKQLKIVVVVLTILCLALLIALIVVAVKSKN

EDDERIAKVSSVDNGDECSDTMKLEVTNTKAAGLFDDLSAEEIIAVRDYMLKQGELNLTK

FEDAATNTNWIYLIELQQPNKSDALAYLDADGKKPERTARVVVYEGASSSPRVREYLVSP

AGKPVRYAPRDGRKDIPFHARPTIDSIEGKEVDRILKNLTKHAYRLLKTSYDGFTYHNCT

PGRCLTWANAAPTALRPGERKLWVWFMRDVPGITLNPVGFEARINTEGTDVSRWGVEMIY

FNNKTYDSVEELMEDYDKQPEKKVLIEAPKQPYYGSFERRGDPQPKKPMRGPRQFEPDGK

RYAVKGHHVEYMGWGFDFRVRTTSGLQLFDIQFNGKRIIYELSIQEALAFYSGWAPARMY

LNYLDDAWRMGSSTFELLRGVDCPETATFFHLWHYLDSGKPRKYSNAVCVFELNTGTPLR

RHFNDDFKGGYSYYGGMVSNVLVLRTVTTPYNYDYVHDYIFYPNGVVEVRVAFTGYVSAT

FWTSDEKFYATEIRKHVAGPMHDHMINYKVDLDILGRKNQYGTIEVGYENITNHWFPDLY

HVQKTMKYEKKSSEKQALYKYNFDTPKYLIFSNSKEKNDLGVLRSYRIQIDTMLKQLYPD

DWYVLKTVPWAKYQLAVTKYKDEEERSSSIFNQNNPFQPLVNFQSFSDDDDNIEDQDLVT

WVTLGSLHIPHAEDIPVTATAGNTARFYIRPFNYFDEDPSVASRDTVIITPKDEEFSGVN

IERFGTPSGSVCTPKDRPLEYKGTYY*

>TRINITY_DN9243_c0_g1_i2.p1

MAVPPKYDDLGKEARDVFGKGYGFGNVKLDVKTKTDKGVEFNIVGSSNNDTGKVGGSLET

KYKYADYGITFSEKWTTDNILSTDIIVEDQIAKGLKLEFDTTFTPNTGKKTAKVKGAYKQ

DHFHSTVDVDFDFAGPTVQASAVAGYEGWVLGYQAAYDTAKSQLIANNFSFGYRSADFHI

HSSVNDGSRFTGAIYHKLAKNLEAAAQLNWASGTSNTSLNVGCKYEVDKDTAFRVKVNSS

SHVGVGYTQTLRPGIKATLSSLIDTKNLNQGGHKLGLTLELEA*

>TRINITY_DN939_c0_g1_i1.p1

MSKSSQSTKFRKVDIDELDENNFQDEQVEDSGSSGPDESEVRNLLMAKKNCDALKAVLAN

PPLLTKDKAVKDKAFSLVLQVLTAFRNNEIDQGVRGLDRTELDVLMKYIYRGFSEPNERS

SAILLGWHEKTLAVAGIGSVVRVLTDRKSV*

>TRINITY_DN9426_c0_g1_i4.p1

MRGERQYGRNFNYEAYVERKHESPRYGSDDGRRESDRNFAVDRPREPPSPSTSDPGSRRD

ADSFNPDQFIWERQTIVLEKANARQGFGIAVSGGKDNPHFKSGDTSIVVSDIVPGSPADG

LLRVNDVILQVNQTNVESVAHSDAVLALKESGNSARLIIRRMKAAPRKDVSDATAVTLIR

DVKEGYGFSLGQRIFIKELAPNGLAQREATLEPGDIVLKINDKWCDKVNLREAIDTVRNS

PTRLDLLVLKGGIQVPQYSTHSLPASYRVKKKEQRDERDHGGMHNGFEEHEPPLPPRLYG

DESPLPQRPPPPDDPRDQAPFSDMGWKRPDTGERVGLQGRDEEEVHMDRMQVVESQPHVP

RAAEVTLTADTTQDGWDRTSRSGYNESISSSPRSERRDMDTLERRRLRDECRLVAFHKSG

SLGIQVQGGNKTGIFVAAVKEGSAAYKQGLRKGDQIFVANDIEFKDITREEAVLILLSLG

DEVSLLCQYKRGLFDKISKEPGDSFYIKTHCDYEKMKEEELTFHREDVFHVWDTMHNGVI

GSWHAQRVTKSNMETEAGVIPNKCRAEQLAQVQKVEEDRPLKRGAGAYSSLKRSSSRGGT

LKKSKFVSSDHLDEESFACTVREFKLPAYERVSLKHPGFIRPVVLLGPIADITREKLLYD

MPDAFAIPTAFGGTLPRGRETPSKARRRSISYAAIKAVVDSGKHCLLDITPDEVERLNYG

QLYPIVIFLKPANKQQIKEMRSQHSSDSKSGRDVKKLYENAMKLEEESGNMFTAVIPTGP

TYNWYANIKDEIKKQQSESVWMSEDKFEDREDLTFRMPNRQSMSYDYDSALDSPPTMRSS

SSTGPVDEDVIAVAEPLHDVRSAPLSDIRVRPAYSEPSINFNGPAREERPPRPSYDDDYR

YGRSPYDEEVDRASRPGYKPRGYAPKVLPSREEGAEKRMSLKKIGLSDEKRAEPDDHELQ

ETRQGLRPVGRTDESDLLRQYDERVGAPMSELYAIAKESTQRREQMDRGYAREAPVEVVK

TTKSSSALDLEQQLEDLEKAGQYSRVEKKPRPKSESYERQPRNIVVDLSQPNQQETVALS

SVLPTRSYATRVSSSRAAEPEVRPVVNNRVESAPSNTYGGDRGRYVAVPSRTQEQPRPKS

TYAYAPKPFNADRNPYTDRGSEPPRPGQPVTYNFRLSRPEREPDPRPTTYRSKSMDRDHP

RDEGQNVVTSDFESLDEETQVVATARGKFTSQGGVLSSPESGVSIVIPEGAIPNGVEQEI

YFKVCKDNNFMPPLDADRGETLLSPLVMCGPHGTQFLKPVELRLPHCASMTPDGWSFALK

SSDTPTDQPSQWKNVTLQGKDGRPDQCQVDSNSVSVLVDHFSFFSLVGRSFPNNQQSRKR

PAKRMLAAVFAIPPRLNSDWLLNIVLLDDTEAAFKDVCNSEASVGRFPFSSFKPILVHGD

SGDVKVLLRDLNKDWIVRSVCKQYIEFHHTWEAFREPACAEFMIRDKNFVRGPGVCSVEI

CQEGHPSDATTLEVTIRPRKVNGDSRVEYLI*

>TRINITY_DN97608_c0_g1_i1.p2

TDCKRCQCPGGSSGNQFSKTCYLDQEFGRGVVVCDSCEIGYTGTQCEQCADGYYGNPLVP

GGRCQKCFCNMNVDPGVPGNCDRGTGECLGCLYNTAGFSCD

In Both

>TRINITY_DN10028_c0_g1_i1.p1

MAAKKEHQLHFVENFGLSGAAAIISKTAAAPIERIKLLVQNQDEMLKSGRLETPYKGIID

CTSRTYRAEGFLSFWRGNLANCIRYFPTQALNFAFKDQIKAVFKPKKTDTYAVKFSKNIA

SGGAAGAMSLMFVYSLDYCRTRLANDAKSGSKGGERQFNGIIDVYRKTLASDGIAGLYRG

FVISCVGIIVYRGFYFGLYDTLKPMLLGEDAGLLMSFVLGYGVTVSAGLASYPIDTIRRR

MMMTSGEAVKYKGSLDCTMQILRNEGFMSMMKGAGANVLRGMAGAGVLAGFDKFKELYIQ

LRFKDD*

>TRINITY_DN10103_c0_g1_i7.p1

EGLGSISGGVLDSSESGDSTEYQSIPDDESPAVGDLVELEQIQLRGTHPHLVKKTSMRPW

PIVAMLPLLVWGLWTLSKWILGKDGGPEGEALSFEPESKGKRGRKRHDRKRLELRGGIGE

AGKSLDNNVGSVTVGGCTTNCTFLTGNIFVAPYHLFLYENGPCAEGTNFRVITDQNSIDL

RFRRAQCNWSPEGDVLFYRVTDPKWKPLRNLRSRLITEDSLAEIQACEANFFKQDGPHFV

KVTRTAVGRYKYAGKDFAIDQGLLYAIDSDIGDCGSFLTVADGKYTGKIIGMHVAGSTTS

ATKYGLATPLTREMFDLVMATPEMPDTFDGDAEAPEIDDDDVRKHLESVKSHKDAILKLG

LQIPGRPVSWERLRRHDDSKLTRAEVRGYVDRWVHGEKTEAWERAVEHHFQNNDHHPQFW

EGDMEEPALKESVVDAMACIWERKLGMEKVNIASLCDWSERDLERYTPSDRRKVKELLAE

FAAYGVVLDPHFDACTWPVGFRKDPEVVRDIITGPNLIGVEKATWNNVAPGNSKLRPTIF

HGKIGPSKPLAILSQEDERSRGYDPLYTGARLLCQNRQVKIPAKLVQQAAERSFNWLKDR

VVNQFPRRLTFKQAVEGIPGLLKPIDPDTACGFPLINQRTKPGKRDFLERGEDGILHGTE

YLETRVEEFIKDLENGVERSSVFLAHCKDERVSSKKVDEIRTRIVYCGDMVANIAFRMLF

GAALINFNNSGANSPVVIGVNPLSLDHDDMKKYLDEAGEGEYLAGDYKAYDLSYQKPVQR

AGYAVLGRLLEYWLGDEFDATAWKMHVKHQTEAQIQFGWSLVSVVAAHFSGLFWTTIMNI

LTNDINTRMAFSLITDLDYDKYVRSQYHGDDNRHKFSRKAIAAGVNPKRFAEAMAEIGQT

YTSDVKGEVLTTSFKPWTLCSFLAAYPVETEWGWTGALRQETLIDAPQWKRSHESEAETV

NQMLDLCSQWDEKTYAQYFEKVAEANQGKFFIPAEAYYLRRERQAHRRGIPLFVAEAPPP

AEKPIITLETAVTPVTVPAAMVNAEIARASISASQMGVNEAMEQKVFRKAVTWTDTGLSD

SVQIQGPYGFLELGEQRSMQNRAFDMFIWWQGTMVVDIQLNAQSFLQGTLVAYWRPLATR

SVGAERGLTCHKLIMQPGTTSYQLPIPFIFPRSVTNNFARGEGDGSLGTFFIEVLNPLTT

GAQSIPRATVSIFSSFMGSKMTLPLPLASIPQRRVPAKWVAPPEEEIVFQVEGGGSSTVN

NTYNISAGGDVPIEVDNSGTSSEGAGVEASLDASIPMPMDKPPLVGGGIPIYQQFSGMAK

ANGMNPTIGMSLHPQQISRTKPDLWPIGSYELSKIMMREDRSHVFNWSTNNAVGDKLLEF

QIQLGTDLATLHNYVGGLFQFWKAHPILTFLAAKTRFHTGKLRVSVGYGVPGSITFDESS

NYESKILDYDAETNRRELKIPYNAQTPVLKTYSGESVADPIQDHVLATVAIFVQNELVAP

ETVAEQVEVNVIQQFEGAELYVPRPFSFLAGDVTSTNIYNVNSGKQEEELGLRAEAPEKD

GLVMTKEEGIADPPQIEPLTNEEMEKKETKPCKLDLGAHMEYHPKTVCELGRRYAEMRVG

RDFMTGIGDFSDTQDPGVPVQFDMIAIQVRPIHPLTTLFAGWRGSLNFRIFLTSDFTPGV

ARVVFVPTNENHQTGINSFNPIGVEGIFSEGTANTTWNALDGDRTFLSVRNSSETPYPAV

EAMYPLTLGENYIDVMVPFQSIYNFLPIQELSFGQRLAVASGQLYVFAPRGVRARVYCAF

ADDLVMGGFAGNTFSRTGYVSTATGVVPFGLNL*

>TRINITY_DN10182_c0_g1_i1.p1

PFILVLIASQASEKSTEELTIKTKMKGFLVVFVVTCTVLSGQVRSDEPRSFDEEEERNPK

RIAAATVIEAGAFGMEVLTKVLDAIGSVSRKIAIGLENESGQTWKRGTINFVSGTSDEVL

PYELGNGYALLFPARKTNGPVARGSVGVMCMCAVDGKYTVCVMYSVPYDYNLYDNWWDVK

AYTGCRKASDGIFDQLYDGDPFKGDSSWKERDLGWGLKMRGSMTGSGDSTLEIHVERK*

>TRINITY_DN10207_c0_g1_i1.p1

MATEVVTTTTTTTETVVVKTEEVVEEIKSNENHIDETKPQDGQEDEKPEIVEEPAKPEEN

GIAQAKVRLDQHPPWSKIPSPLPECLAVETYLRMLKIPYESSYKSTPDWSKLPVVAYEGA

TQRQDIYDFVNTKFGVDPDSHLDEEKKAVSRAFQLMVGESTAWSLVQYRWIDNYAETKKY

YKGKGLLVPDVRTKMEKNKCSKCLEAHTIGKHTKEQIYSIAEKDLRALSTFLGGDKEYFM

GDQPSAIDCTMFGLLANFVYAADTENSPQRKLIEDELTNLKDFCGRMKNDYWLDWSEVCS

DEVVEELKPKKPSLRRKKRTKSATDAKGEAESGEKAEKKEENGEKAEDGEGAEAAAAEGE

PAAEENKEEEEAKEGEEAKEEGGEKNEDEAPAENGEEASEPPAQDAE*

>TRINITY_DN10537_c0_g1_i2.p1

EECREKLTIRQKIQAKDVKADFTFFQSCKKDYRKYEDEYDCGKGKTMHGMLANVLLCLEA

ALNDGKSIDGKCQAELLDVRQQLMEDFSINPEVVRDCEREINDHCLKGTEKEGKTIDCLM

RLGEEDKLGKKCYKAIASLLKETGAGGDYRIDRTLYVACEPVVQTACKEKGQKDGDIMVL

SCLMENMNTDHMVPECREQLLHLEFFLARDFRLDPQLYRVCKSDAEKICHAPDWKETDDV

PTNMIVSCLYRNSKPDIEEDRRVSRKCAAHVKRAMHLRAEDIHLMPEVQDACIADLGSLC

GTKLEKGEELQCLQDHYDELKDECKKAIGTFTEEEGEDYELDRKLVRACSGMVSKFCKEA

VQTGAAEDVLPCLIENKNDASMDSKCHAAIEHWQLTEMKDFKFSDKFKKACRKDVEMFCA

NQVKPSQAKHEIIKCLSTHVRDAVLENQDHTISENCRKQLRIEKFQEAENIKFDPDVYGK

CKADVKNYCSNVTPGSAKVYECLKDHRHKLSKECYEQLFKREEMEAKHPDLDYRLVKVCK

RMIKFFCKDSPPNEILKCLKSNKNAPEMEDSCREMITKRQIIKAEDIALNPSVVVACHRD

IPKFCGDVTHGGFGRVISCLKKHYTDLSDECGEHIRTMMEAASKDYRLDARLKNLCQTEV

ETLCKGIDPGHGKVEECLREKIAEIKSKDCRTEVARTMREGRYDVKADPLLYKACAYDIN

RHCIDVPFGHGQVMRCLLDVHKKNAQGNKLDKECYMHMSARLKMWEAAAKIVPMESLGDI

AMAISQSPSKNYFFIVFATVLALIFLGGLVFGRLSKRVKREMKDR*

>TRINITY_DN107186_c0_g1_i1.p1

RNGGEGPSEISVQIPLSPTVAVDIRSEGCNDPDKTPPCGRAYIDVDDVDRSLHHRGHNVV

VLDAATGDFLEAKAFDTYADAEAGDKLRDYLNSITGHKIVLVAIQDEGSIYLSPAIDALK

RLGATDPILTDYRGSFAFVGSPEEPKPSWITQER

>TRINITY_DN10851_c0_g1_i2.p1

MSRRQDPVVDTSAAKERNESYSSSRNTSTGSSGLYSTYTRVSSIRSSQGAFNRDDIALQH

YDEARNTFSALEASYKKLLLEMDSLKEDHKFKEEKYKSTITSLTGQNQKLQEELANSKSK

CLKYQEDLNTSQRKIREKEWELQTLRRELNSKSGTIENLRSEKSAIEIELVALRDQMSNQ

LVAVPILESSPDDVEMTMLQDQVSQWATDYNRVSEERDNLQSELEALLGKVARLEDECGK

YRREHHVIGLNGNSSVRKYEVHVQATTKQRDSLKGQLEDLRAELRKNRETISSLQREVLE

SQKNAHKFKEECSLKAHRVDTLERANSGLDETIEKLKLELSKCQTALEVEKRHCKSIEES

LQGNERKTKQLEDSLEKVQGEKE

>TRINITY_DN10980_c0_g1_i3.p1

MKTKVHWLMLISGIVAVFSTVVVAGKKGKLARKLTSMLSRMTLAQECPVSLPQDQILVCR

EIRDKELALNQMSYRLVTGGSNPFAHLDLDQVQLATVLALDPGMPDVTKQCAAQYANMTD

TVEVVLKSYIGEELGESVKELTKKIPLKIRLALKGFGIDISGLLNLFGKLSGAIGFAGVM

QTYEEYEELQEHFVSGMESALGLQFPSRVDEAMGEALMLDEYFAQQRLAGVNPMSLQRVR

TKSDQQGGIAWEDLKRTINPVIHSYIEELTSDGRSLFMVRYPLCDDLPKQIDLTDINLIR

KMEETRSPIGLFVTNTSFSGDLEPVAIQIDYTPDCPVYTPKDQAEWEVAKLYLQTTDLLQ

GQIIEHLLKVHFVTELVCVSIKRQLSNLHPLRQIMNFHCADVFMPNIFGGPLLLDPRTGF

MRLLFASGSKGADRLLTSGYRFITWDSLGFEQGIKDRGLSDEPSYFPYRDDGRVIVDAIK

EMVGDYVDNYYSKDHDVQADTEIQNFADEVSAEGTVSPDGKIRGFPNKITTKDELKDVFT

RLVWHVTGQHASVNYGLIDFAAFVPNMPTKTYQMTNSSNLPFNILANQATAAIQASLTAA

LASLRCDLLFDYYDKLVDPAGALIVQDHYHKLQQVSTNLDAVNNQRLANKQMTYPYMLPK

WLPNGIQT*

>TRINITY_DN11012_c0_g1_i1.p1

DGYLKHTKSGYCVRPVGSAVAGVELGLYQSCSGHKFSFTKGGSLQHESSKKCINTANTEM

KPVNGEKLVLSDKCENTEMSAIKEHLVFSFIPTDPYIRMETCCDFGHPRLDQRFEVVDEP

INTICSKFSRNLAYKKSTSQSSTAYNGFSDRAVDENYSSVFNEKSCTHTNEEPDPWWRVD

LGSEHIVTDVLIVNRVNNWKRLTNFDVRVGVHQDQSLNPTCFDRIRTVGQGQAIKLQCNP

PIPGRYVAVQMYGKGILTVCEVSVYSRVGPLADLCQLDNGGCAQSCHNLCNLKVKCGCWP

GYTMAYDGKTCIDKDECQVNNGGCDNIRGLCINTPGSHLCACKQGYSLKENSKTICEDKN

ECNVANAGCEHICNNTAGSFHCDCRAGYKLKSNGYGCEDIDECDTNVDGCEDQCHNYEGG

YYCTCQNGYRLMEDGKSCEEIYCPALEAPFRGAIAPDVCTDDRANIPRSTTCSYSCVEGH

NLVGQDHSQVCQIDGLWQGATPYCKAVTCPKLTQPANGAFVPASCSQADVEYGTRCVFYC

YEGYEKRGPRYTTCQSDRTWSEDAAMSCERVYKEPWIVCPIDTVVDLASDSSTAVLGYKW

QLPRSNMDSLAVSPSNLDENYAFPVGKTRVMWTATNANGATKSCYYHVIVNDVTPPTVAN

CPASFTIKTNNAWETVTWTEPTFTDNVGVSVVSNKKSGQQLERWTTTNIQYIGRDAAGFS

ATCEFSVTIASYQCRPAQPILNGQAFAFGIMMTLTCNQGYYFNPKPPGATGFTNQLYRCM

NGEWNSFGQILTFFPDCVVYSQPSGTSADQCKAGSVLTDLGGGVKLCLNCPPGMFFNTTS

GQCQDCLQGYYQDVDGKMECQICPKGQSTKHTRCKNANDCIDLCRPGHFSDNGLDESGAP

CEKCPKDTFQANEGQRTCDLCPAGSHTISDGATSLDDCVVPARVDEINPSGTHQVTEGDD

IILECFVAGRPTPSISWNRLSGAEITDDRFREYVLYDQDNNVIGVEYVVSKAQMSDSGVF

ECRVQNAQATDSQQVQISVVQAPPTTLPPTGSAPPA*

>TRINITY_DN11163_c0_g1_i1.p1

GIDANVTSVCYMDGSCHKSDDPIIGSSVQDGGIKTAGKMAALDVQVETFACEIWGWRVQF

GKWFAGTFKTTGAQYLWRKVPGRSNDDQYRGTVYQSLLTDITWMPAAESSSFAKHLRRLT

GGGQLSIKFNLDIIDEEAGAKLGVGRIVGTVGVSGAQAPPFASVARILKAHVDYVEDAPF

KFDERAKRLVIDFGNSLPIKRDGSYDTQLIGLLMVALPSKGKSAEESCRSNELVYMGGVN

YTEKNWYQATAGIQAYDQLTEAASQGIISMPLMVVKVTGESSFYTCEKVVLAEEPHGLAV

YPYTDWIQRVEPQDNAAFSFMVTKFGNLSGGAKIELQKCVCPHVFTQGLRVGVPDLNVPT

PIQTEPSGIAGLKIPTVDPGNIRDPYIDGQLYGYVYCTLGNCPDQDKLCNEENRFKLMKH

LIVFRVFSRYVVKGEATWYRDVQPIFQQYAALFPVMKNFMDLGNYYSVVNNKQSIKRTLQ

LAMEEPNHMPVNRDLSRTKRHMLVEWLSQEIPKPGSQEYTLDNLKLMLQTAIELEHSTIP

PYLTALASIKPGYNVQVSKILKTIMVQEMLHLALAANVLNAVGGTPKLYFENFIPSYPTE

MPGGCHPGLVIPIEKCSMGLISNVFMSIEQPSITLTAGTDSPFSFRKLSGCSKEVVEYCM

EFNFAYRATRDMSAGEGEEDCFGELPFIPPVVFHKNTIGGFYNHIMCYLVVLSCPEGQNQ

SIFTGPESRQIEHKGYFGDGKYGHGKLFKVTNLATALLAIREIVAEGEGSSPCNPISWTE

GLEADLSHYFLFDSVVEGSLVEVCNITQGKTPEDLDCAGITYNFTGPTIRFDPDGVWPMS

PNPKMSDFSPGSKAQAEAIMFNRVYTKLLLSLQETFSGQPDKLEDALSVMYSLTMHLNRL

LRTPLHDGGDPYVGPNAGPTYDFTP*

>TRINITY_DN11251_c0_g1_i1.p1

LKESIGKMTRASGSPALVDTLEEAKKLFESSNLRANAIKVFVVIADRTSGRSIEDIRSAG

TALERTGIRVIAVSVGKETDPEKLKSASWDDSVISSPVSGNPQKLGEEIMAKILEDKPAV

PELELGFAVAADSSESEKTFKLMKDTMRAIIDEYGMGRVRYGLILFGDSASIKVNFRDGF

KIEQLKQFIEISVKEPRGAALDKALEEAKKMFTGPGVRGDARKVLVVITDKGSGRSPSDI

REAAGELREEQVDIVVLSIGEESDKDELENMYPLGVVSEKKDSYPEDVADSVMKVVLEGG

AESAKIDLAFAVSASGRNSDLAFQLMKKTIKRIAEDNQGHDIQFSLILFGEEADTEISFA

ERVNVTALKASVDGLVKAVGDSSLESGLAEARREFRRSGVRVDAVKVLVVLVDKSEGVGE

KEVVAAAEGLTRIGVRVVVVALGEQADGGELEKVTTRKENVVEAGIDEDEKKLGEDIMDA

VLSEERVVPEIELAFAISATGA

>TRINITY_DN11579_c0_g1_i2.p1

MDAWILIVFALLSAAAHVTNAEDVDGGYTEWSAWTACSVTCGSGTMVRVRQCTNPAPQGN

GRDCESLGLPEEPKICKAKMKKCKKRQDVCKVGMDLHVMIDRSRSIPYGVLKAVVRRFIP

ALVAKLKPSKKATRVTFSLFSRRNYFELLNDFKKKSSYQEESLNNLVLGIPVDKRYFTTR

IKHALKEVYKGVFKKKKDRKNKQNVLLILGDGNSHPPVKTLTKQATKLRLKKNCHIVAVG

YGRRGKQDVAALRELAGQNVILVKKRPARKLASRKLIKKVVRAICAVDGGFGKWTKWSAC

NAQCDTPGVQVHQRYCTRPVPARRGKGCSGSFYEKRECTGPCA*

>TRINITY_DN11748_c0_g1_i1.p1

LWVDFRSDSSDTQSGFRVNWKVEGYKPTTPSSSPSPAPTTSPTPTPTSTSRPTTAATPVC

GRQQLSGDRGSFTSPGFPAKYLAHQECVWIISASAGKTIRLSFQEFYTEQSSTCQYDFVE

IRNGQSGADPLLGKYCGRHTDTLTVTSTGPFLYVKFKSDGALQYSGFSASWTSVAVPTTP

PKTTQATSPTPEKPASCGGNFSEVSGTLKSPNYPANYPGLAFCEWNLVVPQGYRIRLEFI

ELDLEYHHACRFDYIRVHEGPSSRETELGKFCGNSTKTPGELVDSTSNKLTVQFKSDFVN

AGRGFEAYWFAYMPPTTTPSVTPTGVMGRETPECGGRFTEPSGDLYSPNFPREYPANLDC

IWIIEVPEGNVSIGFEEFDLEENALCRADYVELRDGGSEASPFVGRFCGSNGPIIYNANG

NKLWIKFHTDGKVQGTGFEATWTITEEALEIQNVEGEDGGEEKPLPSPAKKCAEALGMES

GKITDSQVTASSVWMGISTFGPQRARLNNRKWPQGWSE

>TRINITY_DN134_c0_g2_i1.p1

RCSRLEKSMKLQRIFQEMINIIDWMDEVKLVLLSEDYGKHLLGVEDLLQKHSLVEADIAA

QADRVHAVNEQAEAFLNMEPQEDGFKPDENQIRNHQTELSNVNNDLLQLAAARRGRLDES

HKLQSFYRDAEEEEMWITEKEYSLQSTDYGHDLNSCMILLNKHEAVEREMAARSTHTQDV

MKSGQDLIDAGHYASDSVQARMVTIENKWKNLHDIAAYRKKKIQENLQLQQFIAEYNDIM

SWLNMMERVVANDDLGYDEASTDALLKKHKIVEEDIENYATVIKALHDMVDQLGDEDKTS

PEVVDRCRSVDDRYEALLQRAAIRRQKLLDALSLHQLNRDAYIVESWINEKEDRLDSALT

VDKSMDLEECQLIEQRFDGFTQELNANEKRVEVVNDLGSQLIEKGHINSDEIRETTDRTN

TRWANLRAAADKKRADLDKALRLQQYYADVTETRLWISEKSSLLLSVEEVTNMKDLSTVM

VLQRRLNSIQRDVGPLEDKVTCLEKEADELCSEYEGEPEEPIIREKIESVSSPWKELKDN

VKKRDEALAESGELQRFVIDLDNFQEWLNTTEEQVVSDEIPNSLLDAEQMLKEHEDLKDE

IDSREPDFSQLMESGPKWIQDESDLQQQSLKEQLDNLETGWNDLHVLWEKRKRLLIEALN

NQLFIRDSKQCEALLGQQELFLSKQEVGATVEAVLDQIKKHEEFSHRMDANDEKINQMVA

FADRLASENHYAGDKISAKARSIDEWRVANRQKLEAALARLRDALQLQQFIQDAEEMYDW

LNERYNIASEESYRDLSNIQGKVMRHKAFEAELEANKERLDQICESGRSLAEEKPEDKPE

IDERLEKLNVKWQELEAASKLKGQKLGDAKKQEEFNAGVKSIEGWITELESVNVSTEKAT

DLTTATRLYQKHKMIKEEIQAKRTHLAELNSAAQDLVDAGHFDPDAVKEQTIVMEQRYDA

MEAPMDERGADLESSLNFYQFNRDVDDEEAWIKEKEPQLQSTNYGNNLFEVQKLLKRHRT

LCAEIKIHEKHKDSISEKGEEMVQAGHPSSDEIQERTEELQEQWDGLKKLSDEYKAQLDL

SLQAKQYYYDASEAEAWMSEQELNMMGDERGKDEASASAMLKKHETLEAAIADYAENVNE

LRDTANGLVESEHPESETILVRQEQVDKLYDGLKDLAEERRGKLDETLKLYQLNREVDDL

ELWIADREVVAGSQDIGQDLAQVELLIEKFREFARETTNIGTERVASTNAVCDQLIGTGH

SDAATIAEWKDQINESWAGLLELIETRKKLLEEARERHKFFDDAKEALSMIQEKENLLTS

DLGRDLNSVRQLQVIHQGYEADLAPLGNQVAAVQEEAARLQGSYAGDKAREIQQKEDEVV

EAWKNLNLHVRQRTDLLHDADDLHRFLLAVKEQMLWINDMLKTILAYEKAKDVPGVEALM

REHQSLKVEIDARQDSFQDVIKMGEALLAKNHYASVEIQEKLDMLNRSRSELHLEWEKRW

EHLNLILEVMQFARDAYMAERWMVSQEPQLKTDNLGEDIAEVEKLLEKHGNFEKLVLAQE

ERFAALERLTAFEEREKLRRKAEKERREREERERVERAERERQEAEQRERERQQEEQAAR

LRAEQERREAEQRAADAAATVASAQAAQVHAAPDEKGEEDDSVTDIKMEGYLHRKPTMDG

NKKATIRQWKSFYVILRDMELHFYKDQKSTRTSEHEAAHPLPTAANECEVASTYTKRKHV

FRFRTSDGHEYLFQAKDEDDMQLWIRHITEAREGTPSKKEKRPSSKKGKKKH*

>TRINITY_DN14331_c0_g1_i1.p1

MEAKKMNKVKDKFNAVKEAIDQADLRKQESDSGLKAAEDRALQFENEAQSIKRRIQLLTD

KLNETNVRLDEQKEKLEDTSGKHQNEQAAGTELASLEDETEDQLAVLEADVRDTQKLAEE

NQHKLVEAQRRYTVVEQELSKMVDKAESKEERVKDLEKTITMMGNKLKLLSDKDEDASER

EDDQERQAKWLEEELQKKVQECEDLVREVSKLERLSGQTGDEIESWAKKKEAVQDEMQRI

CDDVDDDEF*

>TRINITY_DN1504_c0_g1_i2.p1

ARKDIVVVGSCLFARMQQRLPFVFLVVLAISGHAESEQSSPEMNEQEFEVEWQKVMEEKA

HHECTPGGDVAIVVDRSMSIKLPHLRSLKLDLATLIDQFTVGPNATHIGLLLFARSVEVV

IRFTDEQYYSNDAVKQRIHEIPEKLIYQTRTDKALKTANEEFFGSFNTGDRPDKPNYLFV

LTDGRPYPPDKVAPFNETVPLLEAKGVYTVAVGIGREFRKDTGVLSQIAGRNGQVERVAN

YGVLGQQIQQIVKKMCDRDCGLSEWGDWADCSAPCGGGVQTRTRTCTNPPPRGGGKTYEE

QKEELGSLEESRDCNTWLCEPEPCNPGIDLGIIVDASKSIRRKHFKKFKRALIELVGRFV

IGANNTRVGLIEFDRTADVWFTLADSQYYNLTALQNKIAEIPAILEFHSRMDLALVAART

QLFGSESLGDRPDRANYLFVFTDGRPYPEKKIIPFSKTVQPLEDQGVTILSIGIGKPSQI

KQEILEQIAGNNGHVIRANNMSHFMDKISTIVSDTCDRDGGYSHWSEWSSCSATCDGGEQ

QRSRTCDNPPPRGKGKKCDHLGPATETQECNTRECVPRP*

>TRINITY_DN15317_c0_g1_i3.p1

VCCAVDDNGTGLFLLYTMMKFLLVMLLTCTLCASYEDSHYQRVKQAAFTKLRMMLFDDGG

DSGGPQKTKEKCMEELVDGVNIIIQAAAPLIHHFVKEDNALKKKLVEEILLKADSEEEAL

EAIGNHIIHRVEDVFGLIGHAAEYAEKTKFNEKTEAAVKKVIREVEEEGYLDNEELSKFF

MNQVKTASDGKRDGPYVKMGVAAGLAGNRFLTIMGKLIDKMVKDYSEIWAIKDPKERAIR

LARKFFADIRRAFIVMHKLECKLEGKDCRKDGGEGEGGEQGEEGGEKGGEEGGERGVGER

GGEGEADFEEGNDEAVEDFLQTLPSARSVLRAVETRLHALNDFRSFLADGRQALEPHQAS

DVSGQIKKQTETELKIGESMLPHNKKRPLTRE*

>TRINITY_DN16272_c0_g1_i2.p1

GRHRWIIRRVSCTTAAMKVWCLALVLLASYAYAFPVEEELSDEEFLQDEENQEDYRHEKV

IKVPYKVPVHIDRVVKVPVVKKVPVRVPVPYHVPVPVHHTRIVKMPVVHKVPFPVRVPVH

VPVPVVHTKYIKVPVYKHVKVPVYHPVYHTKHVPVIKKVPVHITRNKYIKTPVHITHTKY

EKYPVRVPVPVVRTHYVKTNVYKKVPYPVHITHVKYNRVPVVKYVKEIQKVHVNKYIHHK

GHSHGPKYY*

>TRINITY_DN16632_c0_g1_i1.p1

CSHSWSLFEIRKMSADLQWMMLRKNSCFLIKSQGVTMSKEPNNLTGKNTFKYSGVVNKKV

LGVDAKPNGKGLVMTTKKTKFLNKPVKVMNKVSLTNGSRSSIKTIRNFCRKNHYRADLED

AAVRRACAILRSQRPTAGVQKNRSRRKRN*

>TRINITY_DN168_c1_g1_i1.p1

MSGLVKAKKYDWKDSNLALFGSDLERNVKKDAAETEKAWRGSGQKVGIQIWRIVQFKVTD

WPKEDYGNFYNGDSYIILRTYKKDPNSEELDYDVHFWIGKYSTQDEYGTAAYKTVELDTF

LDDKPVQHREVQDNESELFKSYFNKFTIWKGGADTGFRRVEPTQYTPSLLRVHAEKKRVE

VKEVPMKFENLSKDDVFIIDLGLQIYRWMGEDANQKERYSSGQYAQELRSKRGGKPSYET

LDDQTPEMLPDHLRQYFTVGQKKEKEQTDAKPKKELVLNRVSDASGTLQFKEISRGSGVQ

RSQLNSNDVFILDTGLECFVWAGKGASIDERRKGMEFAHNYLMKTDHPCVPVHVVKDEHE

PDNFNKLF*

>TRINITY_DN16950_c0_g1_i1.p1

IFKLLCNVSRNEKNTWFFCSIAGNECNPIMDLMFIVDSSGSIGRSNWARLKRFLMSITSN

LDVGRGKTHISTISYSTEPRIEFRFTDRQDKAEVNSRLEGMVWQRGFTYIDKALLLADSD

SFTAASGMRSNTIKVAIVITDGAQTTTKGPYTELSVASSGLKNKGVTVYALGIGKNVKES

ELEKIASGRDYVYSATSFKDLQPISDRLRNNFCAVPPKIVYHTPDDTTELGKNVTLECVA

TGVPTPTVVWTKDGREYGETRAEGKSVLRIVGLCNEDIGTFTCKAQNGVRNNDGTVIVVT

EDTKIDVLEPCEREGCSAPHNLGCRNEGNEAVCICPVCDEVDEAPVCSKDRVQDSGRCEI

RRQSCLVGENIEIAKEGPRG

>TRINITY_DN18094_c0_g1_i1.p1

ARLTSFLMFTDVDIPSRRLSHLTMVWGQWTDHETTLGAQPDIMCEDRCGEVGGECASITV

PQNDPRFPPIGVFCIPLRRDVPAVPASCGQMRPREQLNTLTAYIDASQIYGASLEIQMRE

REMNPDVGRIMERPHPAGPGLMGLLPIMTNGTCRSPNPLLFPCFRSGDERTNENQGLAAL

HHVFTREHNRIAQRLRQLNPLWTGERIFQTTRKIMGAINQHITYSEYLTEILDPATRENF

GLNLHPDGFSDGYNPTINPGVINSFAAAAFRFGHSQIRNTLSRIGENGQEFMEIDISDNH

DPSYLYDLGNGGIDAILRGLVFDPAQSVDGFFSRAIQENLRRDENDISDLLSINIQRARE

RGVPGYNSFRRACGLRPFNSFDDFKTTMPTNIVERMRFLYRSHEDVDLFVAGIMERELPG

GALGPTFACIIAEQFRHLRYGDRFWYERDDPTVGFTLAQLNELRKASLARLFCDNSDNIG

MMPARLLSVKSEPVPCHTLPTMDLRYWRDAPTHY*

>TRINITY_DN1943_c0_g1_i24.p1

EVVDITEHSSFEPYHFEVASSECRSIFTESEKETSRMRGHIILFAVFSVIVAGRSSAEAK

KPEPCTEGTEFNDDCGHECVCDAKGQAANCTRVRKEFTTMTEEEQKRYVSTAKKIATDPR

FKPAYDDLIYTHRILFPSIIHTADMFLPWHRYFLLQYENLLRQASDCRVNAIYWDWSLVA

DDPFRGEPGDVWYAGDRGLGGNGKCQEGENGPCCVGDGVFAEGGFSLVPASATECLKRNF

DSKPVQNRTTLQALLKETNFEKFEATWRQFHNWIHVAIGGTMATDDSASAPEFFFHHGFV

DKFWGDWQAVSDANKHAYFWKVNQLMPRQGIWPWQVIDLMNMPASMGRIQVKYAPPIKPR

AGKNLAIEEEEPGSFFHMSPDDAALAKSEEDKIKAQN*

>TRINITY_DN19495_c1_g2_i2.p1

MSWTALILVVCTANLIQADDPCNEVDPDSRIDCGYFGINQHQCEAERSCCWDDSVQDAPW

CFTKGLEPPPAEQCQTKPEGRTECGWFGVNQEQCESNGCCYGETDVGGAPWCFKPADPAC

AAVDPDSRIDCGYFGINQGQCENDRGCCWDGLTEGDAPWCFTQGLPAPPDEDCKAEPADR

QDCGWVGVTQEQCESKGCCYGETDVEGAPWCFEAETKSA*

>TRINITY_DN20198_c0_g1_i1.p1

MFKQKIQRMKKELGEQDATRKALRERELFVLDNSLRESTVGQLRGHTIENKWKIYEEVKK

VGFKHIIVASFSHMTRLGDTFIQQLAEKGEDFETLWAFSEFIESIDKNRVPDAKTIPIGL

RKMKELGLKNAIIEADLVYRGIDYKKFKIEAICELFSQRMKWCRENLSKDARIVFNLRDM

PDGMKTKPKRILKAVRYLSSLPPNERPFGIVYEESGKYLPEELGVWTAAVRREMDECGFQ

EGHLLVHVHEQWGMADSTQLECIANGANGIWASLCIEGASMGHSCSSVTLMNLIRLGNKK

VLKQYNCTKLREAAQGVTRITTGLEPYGKQPVYGERALDMVFGMPNFTPSKKEFSMAEFF

GQQPVMRMTTLASPKMVADRFTNLFGEDPQFTEERGKRMLEVMLEDLHKNRKEEYMSAVG

LAVLFDRSGGKLTAKMAEVIAADEPKKVHTQKLIAEIRKMWDEWDLRDSDQKDDALAFDS

FYNGFMAPYFGCYRCQETKLALKAIDMDEDGTVDWNEFALYLKWAARQYPETPDTEALLS

IAFRKGLIPAMQDMVLKQTDE*

>TRINITY_DN2037_c0_g2_i1.p1

QDGGKFKMLNSKSSMAFWRLLLGLLVVHFVASSPVLGPLFRLPHDVLEMDEECKDERSDC

SWLVNNANEDESLEEYCLRNRQNTAVKQCAKTCNFCKPPAQEECKDERSDCSWLVNNANE

DESLEEYCLRNRQNTAVKQCAKTCNFCKPPAQEECKDERSDCSWLVNNANEDESLEEYCL

RNLHNTAVKQCAKTCNFCKPPAQEECKDERSDCSWLVNNANEDESLEEYCLRNRQNTAVK

QCAKTCNFCKPPAPEECKDEREDCGWVIAAHAGQSKQTVDEYCEHWKLDPAVKACAKTCN

FCKTPSPIGCKDERNCDWILDNTGPNKGETLEEYCETWKNDAAVQQCPKTCRLCE*

>TRINITY_DN20865_c0_g2_i1.p1

ALCTNTEGSYVCRCKSGFKGDGKACVDTDECSSGVAKCDVNAVCTNNDGSYACTCNEGFT

GDGRSCAADTCVPDCGDGEHCVRIDGGFQCVCRSGFERVGDVCQDVDECGRPDLNKCDVN

ALCTNTDGAYVCRCISGYHGDGRMCKDVDECTERNVTCASNAGCVNTLGSYRCDCDEGY

>TRINITY_DN2227_c0_g1_i1.p1

MAEPIEDPVAFLRVDNKLALLEESKNFESKKWIWIADDKEGYKAAEVKNSKGNNYVVETN

DGKELSIDKNDAEQMNPPKFEKTEDMANLTYLNEASVLHNLKQRYFGGLIYTYSGLFCVA

VNPYRRLPIYTEKIVFAYRGRRRIEMPPHIFSICDNAYHDMLQDRENQSMLITGESGAGK

TENTKKVIQYLAHVSGQSKPQGSGEAKESTLEDQVVQANPILEAYGNAKTVRNNNSSRFG

KFIRCHFGPQGRLAGADIESYLLEKSRVIYQQEEERNYHIFYQILYGAPKELKDKLLLDS

SKSKDYEFLRKGAEKADGINDVEEFKGTELAADTLGFSEDDKLSMYKICAACMHWGNSKF

KQRPREEQAEVADPKDLEKVAFLLGISVTDFTKSIVKPRIKVGREFVNQGRNMQQVIYSI

GALSKSMYERMFLWLVSRINQTLATKDRRAFFIGVLDIAGFEIFKLNTFEQLCINLTNEK

LQQFFNHHMFILEQEEYKREGIEWDFINFGLDLEPTINLIEKPMGVFAILEEECIVPKAT

DMTFLEKMHKNHGDGKHPKYSKAKTAGKNKVDYHFELTHYAGVVGYNVDGWLQKNKDPIN

EAVATLFSKSQDPFVANLFKEFATETHTRGKGGSFQTVSNKHKEQLGRLMDTLYSTTPHF

VRCIVPNEHKKAGVIEAHLVLNQLRCNGVLEGIRICRKGFPNRVPFQDFRQRYQILAPTA

VASGFVDGKKACELLLDAMTLESSEYRIGNSKVFFKAGVLGRLEDMRDERLAKIISMFQA

YCKGYLMRKEYRKMCDQRIGIAVIQRNVRKYLFLRNWSWWRLYTKVKPLLNVARADEEMR

AKAEELTKLQDKFAKEEELRKELEEKMTKLMEEKNQLFQDLQREQDVSADAEERAQKLEA

RKADLEAQLKELSDQLEDEEEASAELSEARKKMDAEMQDLKADIEDLEASLKKAEQDVSS

RDKTIDGLNDELAHQDEEISKLSKDKKKMEEANQELQDQLQEEEDKVNHLKKVKDKLEKE

LDDTADHWEREKKARADVEKVKRKLEGDLKMTQDSLEEVKIEKQHAEDEIRKREGEISEL

NVKIEDQSNLIESLRKKIRDLEARIEELQDDLEQERAARAKAERARMELERELDDLNDRL

DEQGGATQAQMELNKKREADITKLRKDVEEQGLQHEQAISSMRNKHNMALQEVQEEIDAI

KKTKAKVEKERNQLQNENDELVVNLEQIQKLKAQSDKQGRHSDEQLSEARLQVDELKKSV

GELEVSKSRLNQENADLGKQVEEQESKVGSLTKAKKTLEQQMEDLKKTLDDEARAKADAQ

SKLKNLEIEFDNLQENLEEAEDGKADVQKQLSRSNAELLALKTKFDQEVSGKIEELEDAR

RKLSSKLQEMEEAYNAAAQKASTTEKVRKRMEGELEDALIDLEKAQANNANLEKKQKKID

QQINEWKMKVDDLQMDLDNAHKEARGYSTEMYKVKGLHEETMEQLEALRRENKGLLAEVS

DLTEQLGEGGKTTAEREKMRKKLEMERDELQAAVEELEGALELEEGKVLKAQLELNQNKQ

ESERKLADKDEEIEVTRKNHQRQLDALQASLDQEVKAKNDLSRAKKKFEMDLNDAEINLE

NALKSNAEHQKNTKRLQQQVKDLQLMVEEEQRGKDEIREALTRAERKASEMSSELDETRT

ALEQADRARKAADQEKLDASERLVEVSNQNNALTQAKRKLEGQIATLQEEMEDYENEAKA

ADERAKRALADLARCQQELQQTQDRSTAAERGRVNAERQVKDLELRLEELEASGGKALKA

QIKKLEQRVGELQTDLDVETKRSSEFQKLAKKFERRQKEVAMQTEEHEKNIQTLKENNDR

LNKKIKNLRQQLEDSEALAAQNLARYRKTAAELEDAEERAESAESALQKARSRARASGVG

VSRQTSSREKKRSPSPSPAAEE*

>TRINITY_DN2417_c0_g1_i1.p1

MFMIFGASPPTSNITNSSSLHLKNSQRILPDWPKIGDRITQPFLDQLMVSQLLEQNLTLG

FFLKGLNGPPGPPGPPGPPGEPGSPGIAGPPGPSGHVGEDGAPGASGAPGPPGPPGPPGL

PGERGDPGEQGAPGAAGLPGAPGLPGSQGPMGPPGPEPIMPNFTVICEGEKGWLQCKQYE

LIKVTRAFWGRDDHVTCPKVPAGLSTDRLCEAMADNTMQKVNGQCKNEQACEVVASNIFF

DDNTCGNVYKYLKVWYECIPDEANAVDVLKDGKKRRRKRKRATKEKRSSKE*

>TRINITY_DN2428_c0_g2_i1.p1

NDWQPQRRPKGSLPPLLHVLLLVLVVSRTSRKTMKSAVLLLVTIALLLCEVHGAVQMRWC

YKGNAEKKKCEDLKNVIPSVAKAAGVPDVTSKCVDGTDAEGCLKLIKENSADLTGLDGGE

MLPAETYVMPIVSETHAGTGIKYYAVAVVKKSNPNINLKNLNGTKTCHTGARKSAGWVLP

VGYMLSKKIMPSGPCNEVRDFLAAGKFFSESCVPNVAKYNESGNLTGNLCALCKKNCSSA

DDYAGYAGAFRCMNDGQGDVAFVKHTTVQSAGVNTADFEYLCKDGTRNAIGQHEKCNLGY

SPAHAVVARKGDSQVANYVKVLLKLNQLYGTTQTNYTGFQLFNSTKYGGKDLLFKDSATA

LNNIDEKTIRAYLGDYYDDYKALTGCKDPTTKPKPSPTPTSKSSPLSVQNIMVALSMIVA

VLVAGM*

>TRINITY_DN246_c0_g2_i1.p1

QFFTEVRLILILKKMPDSPAKKPAAKKPAKPAEHPPYIDMIQAAIGALKERSGSSRQKIE

KYIAEHYKVGENLPVQLKLALKRGVASGVLLQPKGTGASGSFKVAQKKTEKKAPKKKAPA

KKPAVKKTTAKKPAAKAAKKPAAKKAAAKKPAAKKPAKKPAAKKSGK*

>TRINITY_DN25600_c0_g2_i2.p2

MNAKTIIALICMVAPAFGSNDLQSRGNCPDFWVDFESKCYLFGNDQDTWDHANSECIERG

AFLLSIKNEQEQMFVEENIRGDSWLGLSDIKEKGVWIWTDDGSQPTYTNWDDGQPDNPDS

ERYGEIYKNGKWNNIYPSKHLYYICKKAQ

>TRINITY_DN261_c0_g1_i4.p1

CGVAVRENNDVIKIDKCGGFPVVQQLSPEPVNGRVRVKRTNLGGTTEFKVFFKSGTEVKV

LTYSWGVNLYVTSPSDDSKRTRGQCGNNNANVGDEPGDWWRYRLAPGQSLFHRLPARVQP

PVDVCPPNWKGNSISCTVSRPGINLNVGMDVVLTPGPLRYGGGRRKRDLTTEEEDEERFY

SENDYLESEVFYDFDYSPNITKRAEELGAVPDWGTQGVTEAQARAKCTEVLQNSGPGKAC

ERFSVGMDDRMDECMLDIQASGDLSIAESAVTSMTAQCVDEASRDPDLLEVDEDGNLVPP

ANVVGAICPGDCSGKGECKDGKCECDAGWGAMDCTIDLNKPPEVTSIQGDGLCNLDKRKC

QVIRLVGSQFLESDKLTCHFQPFKFQDGQETPDGDEVQTKAELSSSVQVACPYPEADQDA

LPWRYHVSVSNNGVDKSAEFKTVVYHSMCHACKDSGECSDNVHKKRACVIDGICYGRQEF

KQGDVCLKCHPFMNRNKWTKYKHDKAPKFDMKTTYSVCVGQSFELDLHATDPEGTQVSFA

LGEGSPAGSSVTDGAFHWEVEGEKPTRAYIVGSDQCGESRRFKIKMKIFQCKCKNGGQCL

SDVEGSPECSLSRRCACPEGTSGNRCEKKG*

>TRINITY_DN26283_c0_g1_i2.p1

WKHLTKELIAAQEKISKLQGTCDELLKDKESNSLKLASMNEALELAISNREEVETGLKQN

LMLTRKELSVTSNSLERSQNKVEQLLQETKNNELKIKSLEEKKQDALDKYWAGLEELTEA

EANIDNLRKEIDELRGKCADNAQKIQVLQKSLDEEREDNEKETGSWNEKMSKLNNLHCKL

TEERDSLRKTLEETQESLAKVNEDLERTSSTLKKKERLFKDEVGSRDEVIDDLANQNMDM

KEELTNTKSALKEARLDNSDLRERLNITADKVERLEKTLEERNNEIEDLLAEAHAKLKVV

KKMKLSDSEGSLAELPAVAIEQDEVGIASTKAAKTNMREVVTSYHRACLASLNDCRNLQE

KLCKAQQDNERLEDNLQRERTESTDIKKALQEVQKKRNKSEEDVKRLRRRLESFKAKSLE

AEKEREDEITEVKGDKLALEKDLWETKESLEKVRAKLRSTEEEKDRYAKDLDSSRKTVVE

AKNEIKTAQSQLDFLQENMLQLKKRIFELEATEKFGQQQLQETDKALHTTQMKVQELEQL

NNDSSKKKTELYQQVAKAQEKIGSLESDCNDKAGQITALERKITTMKSTTNELDKNLEKV

RSDLQASRKECDELEMHRVSLKASNEALKQQVEVSRSELNALHRSLGKIQEENAGLKQEL

LQTRSAKESLQKDNMALEEEREAAKKELHSSDSSLRNAEDKLVKSFQENESLKRQHIKTQ

SSACADLAQKQLEVGKLKAEASSLKQELIEKDKALNDVLTKSKVIEKENEFLKKELGEIH

HQKSDLKLDLNATTSKLQSYVTERECWEREVKNVLTEIDKQKNANLSKEQRMERMRTRYE

QEVKFLQQRLEGLERELRVLHEGNEQQRHADEIAYKLAMESKDMEIDNLKLRLQTTRLHA

NDKSNVLDVMKGQLDQRSAKIQELTDQIKCLKESYQLEVGSLQAELKATQAESLLHTRGD

TSYDNNVGELLDEIQSSRKESDRLRRMLGSKMTEMKSLNNHLTSERTSGQKHASLNKPYS

YSKNPRRAGLMSVE*

>TRINITY_DN26452_c2_g1_i1.p1

VDALTERAQPERRCVSLCCRFLSEKMSQRDDMVYMAKLAEQTERYEEMVEYMTKVAVNCS

ETKKENVMTLEERNLLSVAYKNVIGARRAAWRVISTLEAKQDDKDNLHGEKFDTELLRKY

RLEIEEQLRKSCNEILDTLANDVIPKEEGVDAKVFFLKMRGDYYRYIAEIEMSPSSDAVE

EVPSGKESEKAYQEAQEIAKKLATTHPIRLGLALNFSVYYYEIKKDPKMACKYAKEAFDD

AIAELDSLSEDSYKDSTLIMQLLRDNLTLWSSEDTTEEDKQDTVVQDIEQDD*

>TRINITY_DN2668_c0_g2_i1.p1

MSGKPCILLVFGFVVWIFCVAVEAAPFFYPENVDPSAPASNFDINNLRPYLEFFGYYDPK

TESVDSGGSQTKAVEDLQRFAGLNVTGILDKETITLLRTQRCGKDDTDALRQMKEQGKRR

RKRYYLQGSTWGKKDLTYRFKSFTPDLEEGRIREIMKTSLGMWSAASTLSIREEPDPTVS

DDDVDILIRFVSGYHFDPYPFDGPGGTLAHAYYPLNNKGLSGDAHFDDDERFTTGTSDGI

NLDWVAVHEFGHSLGLGHSNVRDSIMYPWYKGYFPNIALTDDDILGLQALYGKPEPTTAG

PTTNEPTTVPGSPTPVEPTTTLAPTPSTAAKASPPTPSTEAPGADICSARWDAAFERSDG

RVYVFSNDFFWVLSPSLKVELGPSNISSRWKEIPRPIDEAYARTDGKIVFFSGKQYWIYN

QDDTRERGPKPISDFGLPDYVDHIDAAFVYGGNKKTYFFWVDRYWRYDQEKTAIDPGYPR

TINVWGAELASKPGTVMTWPRNGATYFFYGSYYYKILAGSKLSVAPNYPKKSGVAWANCK

A*

>TRINITY_DN27235_c0_g1_i1.p1

TKTIRYSYDGGENWASFAFSKKFVQVQDVMTQLDEKLPVFLIYATTGGRNRAWSVFFVNF

TNVLGRRCTPDDYMSWIPSDTGRGFDRCLLGQKRIFQVRNWTVRCLVGKNYERPTNITSC

ECRRSDFQCDFGFEKKEIDEECSLPTSKNMKIDLIPDNCEEGQYYNRSKGFQKIPGNACE

GGKEEDFAPELTPCPIRKLVGVNLTSSMTKEGTVSIATNTEVPFKVTVEKGYWPNIRIRW

DFGDKTKLVDKSGINGSTMSHTYDRPTPDNCEEGQYYNRSKGFQKIPGNACEGGKEEDFA

PELTPCPIRKLVGVNLTSSMTKEGTVSIATNTEVPFKVTVEKGYWPNIRIRWDFGDKTKL

VDKSGINGSTMSHTYDRPGHYIVVVTLTNARSIFSKNIHIYVQDLLNKDKLNVSFTPAEP

RYDEAVTFSATLQDYSYEAYGHVKFQWFVNGKELGGEHPVLKHHFEKSGSFNVMVAVSNR

VSKFQKSITVKIHPDLTPKNIRVRSVGPTSVNIEWDKPQEADQYITGYKILQKSPTDPSF

HMVLQTESSNTKANVQKLLPATAYRFKVVTMTTNVGEFSSVETVAVVTNISKPGKPEETQ

AESLSVTSIKLTWKPPTQTRDGITGYVIRWWSEASNVIRNERVAADVRQKQFTNLEQNTM

YYFEVIAMSTLAKGNPTDPVSARTKVSKPSLPPRRLQHVTDNGTCAYISWDTPYVSSSDD

SLFPAEGYNVYLDQKLKNTVRRKYVELCGLVAGATYTVRVSAYTTSGEGPPASVSFTTEA

SRANTPNNLKAKALSSSQIKITWDVPSNAEGVNFIIKQVSPVGSAKAATVAASVGSYMVN

DLKPFTSYLFSVGVHQGASSMVTTRTLEDYPGIVKYVSAILIAPKSSTIKLSWTQPSEPN

GVITGYKIHWSSSIGDGNKETMVTAGSNQNSYTFRHLRKSTNYTFAVVAKTSAGDGQRYG

KDIALQTEKAIKGTERLQMAWDGDDQSRSARSTTGGADKESEAFIRGASKFAKVDDSRFA

DVDVQSGKTVEFDLLPPLSGDKGPSNEEVKATLDNGFTFGEKTVVPKSLKVLSTYDDGNS

APTASWGAQTGEKKSSVSSMWMVGIIIPIIIGIALLAGMVFYYRKYKALEGVYSKAVYQA

NDDQMSINYDGLATESPGVVFSDINPKKKQYRDAEKIPLGENDELSMV*

>TRINITY_DN27972_c0_g1_i14.p1

MRTLVSLFSLLLVVHSARGGCRDANWWDVLDKPNIWATCNANEYITGLWRSESGGMLPLF

SDDTVARLKQAKCCRPLASHGLQDCIEANWWSSFDRTGWSNCPNGRYLQGIYKSNDKWLH

NIEKGKCCRPPGHPDKWGHCYDQDVKLSFDHQGWSSCNGGYYLVGFYRDGCDRLYCIDKF

YCCKMQENRS*

>TRINITY_DN2876_c0_g1_i7.p1

MFKFLGFGRGARSSDHLKDKQGKDLFEFSKAIEHGFPPKSSAIAHDPALRLLAIGTSSGV

LKIYGRPGVELSARHSKETVIQELHFLPEQGRVISVCDDGEQNTIHLWEVNKRNGKSVLE

EVKTCTLEGRLKKISVCRLSMSTNRLYLGTEGGNIYLLDINSFELQEYVIYQDVVMQSVS

DENKSNAGSVEAIQEHPSDSNKILIGYRKGLTVLWEHGSCSVRQTFLVSQELQGVAWYPD

GDKFVSAHADGSLNVWSVGEEEMNRDSNTPFGPFPCKAITKIELSNNLLFFAGGMPRASY

GDKHCISVMKDSTIQVVFDFTSHVLDFFTIGEEDSHFLAVLCEQEFVLIDLSGKDKGYPT

FVKPYLACLHSSPITSSHHCHDCPAELWDKITAAGQDQMTDEHSSKDWPITGGKTICEEA

DTRNLLVTGHEDGSVNFWDVSHEGMSLLYAVQTSKFFVGDHEAHDGEPQEGEEDAWPPFK

KVGKFDPCSDDPRYAVTKVSLCTKTNVLTVAGNGGQVLIFDISDESSEGELEITEIDFVA

DKENFQWKGHGPLLPKEGKIASPKGFKPRMGLQLTPAAPITALAVHSDWGLVAAGTVHGV

IMFDYLNKKTITTKWTVVEGESATGEHLSRKKSLKQSIRNSIRRLRRSRKGSSPKKRGEG

GEGEEAAAQATSPVSRLVNENRVEEDVMSMVRCLYFVDTYLRDGATRSASLWAGTNSGHI

YVFYINVPDDRSAGEVSGELGKEIKLKHKAPVVSIFVVDKDGVPLAQTCADDGEKGPDMS

GQHSLVICSEEQFKTFTLPHLKPRTKEKLTAIDGSRVRKIGLINVTSKNDEPGVVYHCLA

CLSNQGDLSVYSIPRLKLQLKASCLKKEDVSGISSLVFTSNGQGFYLSSNSEMQRFSLTI

NEPLEHDCILELAEGMRPAEPEPALAAEVELEVEAEKKSRSSSSSSSSSDSKKEEKKEEE

EEKKEEEEEEKKEEEEEKEEKKEKEEDEAAKHDDMLEISEVTTIVKTEPLEEGESSTKVF

SQTRTVVSESHSYTKQTSGTEEVPDLSELTLDAGTTEATSYSVSSSRVVTQKTVITSSST

SEHVITSEGLTIENGDMEQEPEVSDSGEGKKRGKGFKSPGKLFSKKDTDESAAAQA*

>TRINITY_DN28792_c0_g1_i1.p1

VRDKMARWPGLLDKLQGLLENVTEANKTAHDAITRGENTLKKAQEMLETLQKFNEIIDKS

RKEAVEAESNIPEIRRLIDSANMKTDSANATLSKAREMASEAEMTSNKAKETAQRVQESA

NQIKTDATNLQIPTDNLTEPVKEASDRLDSFNATAQRQTEGIARAKNSSRT

>TRINITY_DN2887_c0_g1_i7.p1

MGTRAQFQCGVLVLLLLGVAATDFTPPLDTADFVEEFQILGNLLTDAQTVGMCSSRPLPY

TDRVTAADVAFDLARAGRITTSSDRLFPNGLPESFVIFVTVKAETNSSGDLFTMYDKDQH

QLSFRLNPIELKYRDGKTASKVGYPISIADGKWHRIAFALSDDSIQVILDCDQPFDALPR

PENFKPQLRSSGKIALGGRTGTFKGTLQQLLIVPDPSLVNRYCTDFTPSCNAPLPYAPFL

PVRAANGFVEINNVRYFKGDRGQAGPPGLPGAQGPPGGRGFNGTVGNPGPVGAAGPPGDP

GPPGPPGNPGQGIFVNWRRLQASDEKGPGPSGPDPVVVPPAVPGEPGPPGARGARGFPGR

RGSAGDKGPQGDPGPLGSPGSPGPPGQQGRPGRRGPDGPDGPRGPPGSSGPKGDQGFAGM

AGMTGHKGPMGLPGPRGEQGDKGEQGGRGASGEQGQPGLPGERGIPGEPGERGPPGSRGS

QGSSGERGPPGSSGPVGPPGQPGVQGAQGLIGPPGPPGIPGQMGQPGPKGETGNSGLPGL

PGQDGMPGYPGAEGPPGAKGDMGSAGPRGPQGYPGLPGEKGNRGRRGPPGEKGDEGLSGY

TGAKGDEGPRGEDGDAGAPGLPGSEGPEGSKGRSGMQGSPGPAGASGPKGERGVPGLPGY

AGEPGEKGNIGPQGARGRDGSKGARGNPGPPGAQGQRGRRGPRGERGQDGTPGTPGSKGR

AGESGPAGDPGVPGPPGPQGDRGATGPKGPMGLPGKAGQPGFPGPRGETGSQGSPGQAGP

PGMPGPRGAQGERGDPGSQGPSGQPGATGEPGSQGDPGKDGDKGDAGKPGAPGKDGPQGR

TGADGPKGIMGPPGAPGQRGTEGPPGLPGTPGQSGPRGPPGPSGPQGQRGQPGQPGPAGG

QGEKGNRGEDGERGEPGPEGQPGEPGNPGEDGPPGSPGSEGEKGNQGPTGAPGKKGERGP

KGPGGAPGQVGAPGRPGNVGLPGDQGPQGAQGARGEKGSDGGRGAPGPAGQTGVPGVPGQ

RGQKGERGEGGPPGAVGAAGPRGALGPAGAKGEQGETGVPGDDGRPGEKGDQGAKGRAGA

SGPPGADGRPGQPGSKGSRGDPGPQGAAGARGPPGPQGGRGRMGPSGPPGNQGPPGAQGT

KGSRGKNGVDGPPGPPGQRGAPGARGDDGLSGAPGVPGETGPRGFSGTDGETGDRGDPGP

QGPPGPPGPPGSQGNSGPQGSQGERGPSGPPGEPGPQGNTGMQGSRGAQGAKGDRGQDGP

QGEKGDKGWPGFIGPTGPLGPKGETGDAGPPGPSGFPGEKGNKGEAGSEGAVGLDGPQGV

RGRAGALGPKGNRGPQGTRGDPGSQGPPGPPGPPADIGPFLGGLLSGDQGKGNTRRRRSI

ESEVPEDEFIGAVESLREEIEEIRRPKGTKDNPARSCKDLMLCDRNDGDGFYWIDPNHGC

VDDAIQVFCNFTAGGETCLNPDVNTRMAMRKKWRKMEGAEWFSEFDGGYEISYSKVGKTQ

LNFLRLLSEKASQNFTYYCGRGAVAWWDSASKSYDKAIRLQGDNDGIFGYKKKGVAIKVL

HDECRDNREGKAIFSIETDNLNQMPIVDFSPSMQDNSDEFGFEVGPICFK*

>TRINITY_DN2984_c0_g1_i4.p1

MELDVKMPYSDPTSADAEWKKIQQNTFTRWCNEHLKCVNKYIHNLETDLCDGLKLIALLQ

VLSQKKLPRHNKKPTFQSQKIENVSIALKFIEQENIRLVNIDSSDIVKGNLKLILGLIWT

LILKYQISMPYMDDEPAEGGQKMTPKQALLSWVKSKMPESVPMDNFTTHWNDGRAIACLV

DAAAPGLLPECEDLDPKEPLQNATNAMTLARDWLDVPMVLDPADMVNPKVDELSVMTYVS

YFPEAKCKPGAPLRPRVHPSAKCYATGPGVEPKGLVCKKRAEFTVFTQGAGMGKLSVQVW

GPGKKDVEVFVQDNNDHTFSCYYVPTVVGRYDIHIKWNGRHIPKSPYRVEVSPDLDASKA

YAKGPGLEPRGIVAGKYTDFTVYTKDAGEGQVTVKVIDPRGGEDVDVIIEPQEGGEYFVE

YQPVNTGKHTIKVMFGGQHIAGSPFHVTVDPPKVDPVPSKVKVYGAGVEPSGLKSGQRAP

FTVDTRGAGDGQLDIFVEGPMGEEKVDIKNNGDGTYSCCYFPGKFGKYVVTVTWSGTQVP

NSPFTVKVATPVDASRIRAYGPGLERGSTDSPCEFTVETKGAGIDSLGFAIEGPSQAEIK

CVDQGSGVCHVTYFPRVPGTYAVHITCGDVDIPNSPFMVPISPPGDANLVYAEGPGLEPE

GVVAGVPAEFTVYTDQSGPGLVDVKVIDGNGRKANVDIKDNKDDTYTVTYYPEKPGLYTV

NITFNGQTIPKSPFRVNIGTSNPAKCRAYGPGLEKGLVHQPNKFKIETKGAGEGSLGLTI

EGPSEAKIECQDNGDGSCDVTYWPSDPGAYSINILFADQHIPDSPFVSSISYPLDPSKVK

VDGPGIEPGVRAGEPADIDIDTRLAGDAPLYVDVVDELNQSVPCDVDEEEYGLHAVTYFP

KKSGPHEVTIMYAGEHVPGSPFKVPISPKSDASKVKVTGPGVTREGVQPGKPTWFNIDTQ

DAGKGDARVKVQPVGHGARPVSEVVVEEIKPDVFKCSYTAPEEGDYEVDVAFDGEPVSGS

PFPVQVARPCDASKCVAQGDGLEKAVIDQLAEFDVDCSKAGEGELEAHVINPSGAETDAL

VTNNDDGSYSVSYTPTEEGVHDVDVKYGGKPIRGSPFKAHVLPPTDPTRCKAYGPGLERA

VVDEPANFTVETKGAGEGGLSLAIEGPSEAKLNCTDNGDGTCSASYVPVEPGEYSIHIKF

ADEHIPGSPFIARVTEPVDVRKVKCYGPGLDRTTPLYSTVPQQFTVDASETGDADLDVAI

ETPDRKFIKPDEVREKGDGVYDVVYTPEDEGRYAVNVKYADQHVPNSPFRVRAGPPFDAS

KVKVSGPGVEGKPVTEEVAPFTCDVTEAGVAPLSATVTPPSGPAITPDIKDNGDGTYTVE

YVPEKPGRYGVDVKYGDRRVPGSPFRVQAKPGGDPSQVKVEGLEPDEEIVAGQEHDFDID

ATKAGKGKPQVAITGPGRTKVPAEIVDNNDGTFTCLYTPQEAGVHSYDVQYAGQPVPGSP

FKAKVKPSADASKVEVDGLQPGELVPVGKEHDFDIDASKTGKAEPEVAITAPSGKRVPVE

MTDNQDGTHTCAFVPLEEGRHEVDVKYAGDTVPGSPYSFKATPLEQPVSEEIVAAADERQ

NESLPDWPESPSDGKVRAYGKGLERGIAHEPCEFTVVTKDAGPGGLSLAVEGPSKAVITC

QDNGDGTCSVQYVPEEPGDYNVNVKFADEHIEGSPFVAHVYSSWDDVDAAKPRPTVGKPC

DVCLNIPDIVSPEDLKQLQATLQRPGSRREEPVDLFMNDDGTLGVTFTPYEPGEHLIHVR

KDGQEVQNSPFSVLVQAQRMGDVYPVGHACDLGIKVPEDADELVATLRRPNSSVEEPLKV

SGKLEDDTLDVSFVPREPGEHFLSVKNKKDDTHIPGSPFSILVEAVEPVEAVGCPLDYAL

DIPGINMPEDFAKLKGSLKRPSSDKEEPLKLKLNSDNSLSVSFVPQETGVHYINVTKYGR

HVPGSPFEVDVASEEPARQVGKPMGKGLDSPDVNLPEDYPRLTAALKRPSSNREEPIRLT

LNGDGTLSIAFTPREVGEHLIHLRKDGRDVQNSPFVIMVGDKDKVEEVHPMGKTCDVNLD

IPGVNLPEDLTEGRLKAYLMRPSSVKEEELGLELNPDNTLGVSFVPNEPGEHKISVRKLD

EDVPGSPFSVMVEAAEAVNAVGRPCDCLLDIPNLRLPEDIDSGKLVATLKRPSSNEEEPV

KLKVTSDKQLCVSFVPREPGEHLISVKKYGRHVDKSPFSVMVVAPEEGNSIGRPCGVGLE

IPGLILPEDYTSGRLTATLRRPGSSLEEPLKLGLNSDNTLSVSFTPQETGEHYITVKKSG

RHVTGSPFSVMVSGPGPANPGKVKVTGDGLKKGVAGKPAYFTVDTRDAGYGGLGLAIEGP

SKAQINCTDNEDGTCSVEYLPEVPGKYSINVKFADEDVPGSPFAAHIKPAGAGEDDIIVA

DQGQDNYASPDFDDGPTQRVSEVFEDLVTFGGAGSAQPHDFVFDLKGFKMDDLETTVVSP

DGEVLDSEIIESADNTYTIRFLPEQSGEHTINVKYKSRGTHISGSPFKVFVEAPMWGGAA

KCTAAGPGLERGVVGHPGEFTVWTRDAGPGGLAIAVEGPAKAEIKCKDNGDGSCDITYLP

TAPGDYTVHIRFADEDIKDSPFKVHISPEVEEMFRDLTSDLAESDSGLKVGQPASFSVQT

NADVENVTASVLAPSGTETTASVSNLGDGNFAIRFVPREYGDHLVNVRFDDAHIPGSPFK

IRVGGAEGHPEKVKAYGPGLSSGCVGEPAEFTVNALEAGSGALALSVDGPAKVKMNCSEN

PDGTYNVSYNPVVPGDYTISIKFAGQHIPGSPYSVRVEDGVSPGSTGDASKCTSRGTGLT

RPVLGKPNTFTVNASNAGRGSLMVGVEGPAIPAKEITVRHTGFNVYAVNYALENPGNYIL

KVLWADKHIPGSPFHVSV*

>TRINITY_DN3033_c0_g1_i4.p1

MKFALCFALLCAALSVGEALKCYTCSSTDSWEKCEEIKKELTCGSGQDRCGKVEMQYEAG

GISTKIFAKSCETKQDCDNVKVILKACEAAKDAGADATCKLSCCSGDLCNAGAATVVSVI

LILACVFFALFQ*

>TRINITY_DN3033_c1_g1_i1.p1

TSDQGVFILVRRISLIPLKMNFALCFAFLCAALSVGETLKCYYCRSDESWDACDKVKKES

ICSENMDRCGTLEMTQSKDGEINKMFQRGCSDGPTCEMTSDRMKEICGSDEDITCKTDCC

FGNFCYPKTESGAAPAVVSVILILACAVLALFQ*

>TRINITY_DN30976_c0_g1_i5.p1

MKIIWLVVLALVVAAFSIAKEHDGNDDGKHDEKPDEKPDEKHDGKHDGKHHDRKKDECKK

EKKRDLCHKIRTLEEELKKCQQQKEPVDGGYSPWGEWSECNGQATQERQRTCTNPPPQNG

GKDCSTLGPALQTQDCPKPATTAPPATTTPIPTTPAPKPGETKSNPGTSCKDILDQNSGS

ATGLYWLNVNGNVFQAYCDMETDGGGWTLVYSYTFTDYDAFNAGANAVTPRPNWPSQGGV

TQSTTPPTSETDYNAMDFGLWKSLGNEFMVKSNINHWIACTDGAGSLVNWRAGGISCNIV

KNIANVCLNYVPTSVTFYYGAISLDLTYTYYYFEDMTVFSPATWPTHDPCGNNGLNQLKG

VANPHGNIYIRAS*

>TRINITY_DN3214_c0_g2_i5.p3

MIDTDAEIRIGARQNDGCYYTGKIACVQIYNKALSEAEIAAVKDRCSTKVDGGWSDFGSW

GECSKKCGGGEQERRRTCTNPPPAHGGAECSGSSKEVRDCNTDPCKGVNGGWSKWSAYGK

CSKTCGKGKKYKTRTCTNPPPSNGGKKCKGKAKKGKRCNLGKCPKRRS*

>TRINITY_DN328_c1_g2_i2.p1

MDKIILLVLLCVAGLQFAASKRGRKTGKNPDGCPYGWSFRSGGCYRVYGADTPKWADARE

QCKKIGADLVRITSEEENEFVVGLAKKFAPSRSKLWIGLERDCSDDGEIYWVDGTSVDYS

NWMEGQPDNFGGEENCGHLYLTGEREGLWNDRPCDSPDESIGFICQKECQNGWSYFNGDC

YRIESENEGWRDAVQKCADQGAELAEPTKPNVNAYLADLGAKYAPAPKEYMWIGMNRDCD

KEFRWLNGKAPKYTNWREGQPDDWHESENCAHMYLTKEHKGEWNDINCKTPMAFACQKDD

KRLPRFKKE*

>TRINITY_DN3520_c2_g1_i1.p1

LVQCPLHLWLSKMAKVHTSRNRDLAPGISRYSRSAIYRKRALYKRKKTGVKKVEKEEPKT

KLKEIGGDKNGQKRIVPVKRESRYYPTEDVRRPLANRRKHKPTKLRSSIKPGTVLILLVG

IHRGKRVVFLKQLDSGLLLVTGPYKVNGIPMRRVAQSYVIATQTQVDISGVKIPERVNDD

FFKREPKKKKRSEDMFEDAQEDKKLSDERIEDQKAVDDQILPSLSKVPHLTKYLKTLFTL

RKNQFPHQLVF*

>TRINITY_DN35252_c0_g1_i1.p1

MNKPPHAASRALTDSQNLTADRNQVTRVSGYKNKIRVHSGPFTARAKQRDRSQRHSTDIL

PDLKMQFVLVVLLVCIAASEGRYASEKPYASQSIPVPVKFITTQDEFLPGDKSAKYHAAL

CGGCQFDGLMARFSVNLKNTEWNDDKGDSISLTVQDSTGKTIATNLLGKTPVPDFNFTYA

SKYGDLYFEMTTGSAPAFTYTLALSFDYKPVPGGARPSCAQRWQMTAIEYAAMLKHREMT

KASDMGELVPIFKTETRQTIETMELLHLRLDYCFGPQPQYNITITTVADDRLSGFATYAC

VKTYVQQAGKCDTKTNFKDISGGAANFVLVHLNGPQDYGTIEVIVRGDGRFAGNNFFTLA

ASTPRLP*

>TRINITY_DN3600_c0_g1_i11.p1

MAKNLQHLLLAFALLFAAASAAVQMRWCHFAEEKNKCEDLMKNLTTLAKSELNMELNASC

VAAKDALECMDKIQKKEADLVTLDGGHIILAGKDHNMEVVVAEDYGKGLGTSYYAVAVVK

KGSKFGIKDLKDRKSCHTGAGRTAGWIIPVGFLLSKDIMKRQGTSCNPYLDAGKFFSESC

VPGALLEKFDPKKENPKNLCAVCSGEGAAKCSMSDQEPYYGYGGAFKCMYDGAGDVAFVK

HTTTTEMTAKGNYSSDSDYEYLCPDGTRKAIGQHVACNLGKSPSHAVMTWAGNGNRADYI

KVLVKASAVNNSDIFNSAKYGGKDLLFKDSTVKLVDVGDKKSYKAFLDKTYLDDVEGINK

CITSAGRGLIPFGFSVVLTLFAIFLAV*

>TRINITY_DN36455_c0_g1_i3.p1

LPLSFLARREIRKRSRSRKKSENMSDAVEEGYSSRRRRRIAEDDTEDEAAKRREQRRKER

EARRAEREKEDNDEEERRKAREERRRKKDAGDDAGEETASSRRRREREEAKKKEEEEARR

RQEEEEQRRREEEEQRRREEEEQRRREEERRKQEEEEEEEEEEEEEEEPPSRPQDHMDAV

NGEPEEEEEEEDDSVFAQMSPQKKQAILDGLAAHMRSVVEEREAKSQPVTQVELDELDLK

IRSLRTQVRKQEETQMQLQKQKRELEEKVTRNESTLTRLRTELKNAENENELAIKEGRKT

KAAPGSRPVAKKAEPKGLGFLSVVKKAQAAAWEDKFKAMREKKKNQAPDWLQKAKGRSPI

SVGRANVDKKKEAKPNWSGQVALKKTERKTTSDQEGAKVDFRGQLKKSGPKSPAHDRGGD

TGSEPEWKKVSLRSTPKGSDE*

>TRINITY_DN3751_c0_g1_i1.p1

MVAACSRYTLYFLLWISSLCVSQGLSEDLQTNADPVTGESHRVRRQAGGQVYRLPRSQPD

LDANGIFYNETLPPKGEPGRTGVEGSSGLPGVQGDAGSRGPPGRSGNSGRNGPPGKAGPP

GPPGQRGPNGITLIGAPVGTTLTEEEVEQIVTIYNSMQQQVASGNKAVGMLGPTGAAGSI

GEAGAPGFPGEGGPPGPKGALGESGPQGPSGPPGDPGRPGVPGDEGSPGPTGPPGPPGIK

GDRGPTGQIGMMGRKGQRGGRGQQGQKGARGLTGEQGPPGMSGAPGNNGERGPQGNKGST

GSAGEAGPKGMRGGPGQQGAPGQKGAAGMPGSQGLPGVRGARGEPGQNGAQGETGPAGEP

GSTGRQGNQGERGAPGVVGPPGASGPKGSTGPPGRQGGQGSSGSRGLKGQSGNDGLAGPK

GQQGPPGPGGSKGPMGAAGNKGPAGQQGERGMPGMQGETGDEGPRGPPGPPGIDGARGSP

GAQGMPGSPGQRGPRGDAGRQGPRGRKGIRGEGGEPGPPGRQGRRGTTGRGGERGTPGLP

GSPGAPGYAGHSGPQGAPGQPGPDGAKGSSGPPGDQGPTGNPGSDGDRGPDGAPGGRGDS

GPVGADGLPGPQGAAGDQGAKGPSGGQGLPGRVGNPGRRGSKGPSGAAGEKGPSGDDGTL

GRDGGPGQPGANGEPGPAGAPGPAGSRGDRGSQGRPGPKGGMGPRGAPGSPGSPGPAGLE

GAPGSQGPAGEKGDSGPNGEQGPPGAPGEAGINGNSGEQGRIGEPGEKGQQGESGAPGMP

GRDGMAGARGAAGAPGPAGEAGPQGAQGERGPRGSVGREGSPGELGRVGKDGPMGPPGTP

GEQGRPGQDGPKGNRGESGGPGPAGAQGSSGAQGSPGGKGPRGAKGDAGESGLPGSKGER

GAPGPAGEIGPAGNPGVDGEPGRSGANGQPGQAGPTGSTGSPGPPGSIGQTGFQGQQGVT

GEPGTVGPPGDPGQDGANGRAGNPGRKGENGPKGEQGEAGDNGRAGPPGARGANGARGSK

GEKGNAGGVGAPGVAGQPGPIGATGTQGPQGVRGQSGEQGEVGNPGRDGDRGATGAQGAK

GIQGAQGGRGGVGTKGHRGVIGPPGPPGSPGDRGDPGDEGGRGARGPKGSQGLRGEPGPQ

GLTGSQGLQGRSGQQGRRGGDGETGPKGRMGPVGPPGEPGPPGVADIFSPPQRRKRSLPT

NAAEEQIITFDEKINDVLEMFEDIIRPSGQRDSPARTCKELMQLDPSLPDGYYWLDPNGG

AVEDAFKAFCNFTAGGQTCLSPKTPNTFAYDPVTTQFKFLRLLSKRGEQKISHDCPGSDQ

DFRIIGFNDEEVPMNNHNCQGGHRHSMAVNSVALLPLKDVSMQEQHLTFDLGPVCFQ*

>TRINITY_DN3769_c0_g1_i7.p1

MSDQDTSTQSVGPRVGSSGGSTVRKTVTYTSTKGGSGSGSDVTLHHIHEAKEFFTDFEVL

YRKHRVEMDQMKKQHSQEVHKLTLEIENLKKQRRSLEDQLLDSKGKNKRTQDELVSVRKK

LMEKETEFQALMRDLSSKNNLIATLKSEKLALQKEITTLKSEMVVSTSMVAEVQESAPVE

EDLYSSQIIDIEASLKSSMDEKEGLEDEILSLQSRLARMQGDYEKALRDLDTTKKECGLK

CKKMEAQLQNSQRQREDLKKQLERARDDLKRSKESIAGYQREALDNKKAADRLREELNSK

GKVIRNLEKKNGDLEDQLEQLKQTISECNMKVDVETKQCQAMERDLRNSEKRVAELEALT

ESLQNENDDLRRNITVSRGTISGLETQINKSKNRVKELEVEITQYRVRIQEVESELDDVN

SKHAQLQSTYDVSMSEVDGLRSKLGSHSGKVNDLESLYNITAKERDELKQKIGPLERKIM

DLTKALEKSENAKDDLEQQLDALKNKNSVLETQLASANKTKAQLKRDLDGEKEKVGQLRK

ELNALQAQLAEMQRNLDKSKSDNNRKQKTIDDLRNTIRQLENNIDAQQQELSEVNTKNDI

LEDEKKEALEDLLDATRRAADLEEEVKKEEDDKNRLANELQDVEKKNSELECAFDECDKE

KNGFEEEVLALREKVKRLENELHDTAGKNAILEEDAKKHADVVGKLQDEIDQLKSQLAEA

KRQADSYRKELIERDTLIDSLKAQVADLEKENDDLGSQVVDLKATIASLQDENRRLQLQL

SGKDEEINRMSGEVEMTIKRNEELQNECMIVQDQVQVVESSYQDYLQSAGTGEGDLQNER

DKVANLEKDLQNLRQKIKVLEDRDTMRAKELDEVKAELAAADEKVNDLLADVQRLEGEKD

DIGRDLLVAQSKANELENELGGALEDQKKAEDDLHDLQSKVSRLEGQLETLRKQNAKLKD

QLKDANNANVQLKEKIGSLEVQLNQQEKANESLKKVVEKKDQAIAELNEKIKKLQKLLDD

AKRDLMSLTVANDGLKHDKKELERKLKAQNARIEQLENDLKELKAERNALENKLSNKSHK

LDLTEAQLASVRKERDNLKADVENLNATIRKMKEELLTLRTQARQHEKELEIKNKEIQDK

DALIDRLRNAKQVADEELMKLKKELMNTKNDLEAAQSKIRSLEENLKQSALNESKLELTI

RNLGKESEERDRASMSTDSQYYEIETLYKSSQDRENRLKQELQSYKNRLEKLEADYRKLQ

QENVDLRAKVNSQNKKIRDLQAALDRADKEKKAAREELMNAENSIADLEVGLENETKERE

MLQKQLNDLNERLAKARKDILERDQTILELKMELEAAQKDLAEKDNLVESLKAGKELLQN

ELDNAKAEVAAVSEENDALKEEEAQKRQEILDLNNKVNDLEERLAKLASERDRAMADAKE

GAVKIGDLEAQIRDLTDERTVLEETISDLKREVATLKEDKLDIERQLAELQAKIDYFEKE

LANKDSTIADLKNKNDELEKQIELLKKNLRRLEADYEAALQKNKNLDKSYQSANERIALV

EGAHDTGRDKCRRLEEENANLKKKLAELNVSVKVSSEREQDLNQKLEQAQDKVSQLESMP

PVEPMFAVETESMVESAPGDDMEVAFLKKDLEDMADKCKKLEKDLKKAQESKAQLDRQLD

DRDKKLNDKDDDIHELQKEIQELKTRLQQAGDKTDGPGVVDSLRAQKNALERDNNMLRQE

LSSTKTSLTEVQKRKKDLESEVFALKRKLGDVELKLNMANAEIENMNQEVINSQKKIANL

EDQLKKSQQAQASLRGELDDLRDRLQRTKANLLSAQKQVSDLTSTVENLKRELNDRDNQI

QWLNNNVRQQNEEIAALKLKLANVKEENDRYADQVSELNGQIQEKEAKIHDLELSLTMLR

ADNEKLRKDLADANARAADFKNKYLNALKDIQRLQNEKEVKNQKIYYLENRNKALEADKS

RLKQEIASLKKRMSELRIQLETRQPARSKPDVIVMSNVSEVHSAPPSDMFGVSSEPPATS

KKLKELEAAHKKAVRDKDYANRDLDNLRSKLAKAESDLADSNRSRNAAEGDRDWKAKRIT

QLESALNDLQSKDVVDADEAGQWKNRAAELEQELQKLKNKLTRVEAYNATYEEKVNDLGD

EVVAARQKIAQLESSLDDGRFKFEEKQKEVLEVSKKLADMEAALQTANNAKNDLQREILS

LQAKLDTKEEELQTEAMQHAQTKGAYDQAKARNENLKAEIAKLQKKLRELQQQYDARMLE

WSEGKFTIDRLEDENADLLAELEKLRREIGTLRGDLDNAATEKRDNQAELMKMAPQVQDL

ENQLQNNQEDNAKLRLELASLREMYTEVKTRYERYESETVIMTQSTAVVESGVDMFAEID

GDVKGENDRLNADLASWQNKFGTLQKDHDTLFVDKQRLDDKLGDLQKKLNLLENSSQTLT

SDKNKLYHEVESSKRKNNDLQAELEAARQAKNKLQEENDELQKRLIQLEAEHEIHLKTHV

DYGDSAPYAALQEAYKRSHERENELQQELLAAHKMISNLDHELKATRERVEAVQVSYRTV

EIKCVTLREEVVTYQKRVSELEEKYEICRERNEELEDELTVIQHRVSEIEDENKINQETK

ASLKVEVTTLRTKVSRLEAQLEDAVLEKDHLRLQIAAMRSKGDAASDNDVSRQMTDLRNR

SDDYRRKIDDLQRSLSAKEREQQNSVNEISNLKSEMDDLRKVKHLEGEEREASGNGVDTN

LDDFLALDEALAGGGDPMESTRMDYGVEDDTSTQRVVVKRGKAKQPTA*

>TRINITY_DN377_c0_g1_i3.p1

GCFMGGHKTGLPGFSNCSMESLKRVNDKCLYNVPQEGINAWCGNGIREGDEECDCGTPEM

CKEKDPCCEPHKCALKAAAQCSDLHHSCCKDCLFKKEGSLCREVRTDCDVPEYCPGDSRD

CPGDSYIQDGVPCNRTTKLIQGNTNYHGTVVRKLHQRIQARFVRINPQYYYGWTCLRTEL

YGCSADQVSPTAPSPVKSYDDYCVQTQDGSCSPQDRTAIKFGEKGDCSKDFMEFSLDAKG

VLRHHCSGKMVCPDNGNNGATIRVNSGCTEENSKFERTAGRSLKHLKTGKCIHPNGGWPG

KDRTLVLWSSCDQTRLEFHFIKQDCAFPLGIADGSITDQQMSASSSRSNDLPHFGRLGNS

KYWCAAENNKEQYLQIDLGEIKSVQSIATQGRGNWYNWVTGYHVYYSEDGQRWTGYSESG

DGQHSNANCYLGKCSETHVTQCRDLWGATARNGATACYDELNTNGQDYGTCSPVKHVPCA

NSDVLCGQLQCFSNRDKPVTDFGKNYTTITLKDGDKCSAAILKVDDSLGQGMVLEGTKCG

DGKMCKDNKCQQVSAKSCPVINGATCAGRGVCTNTGECHCDIGYDPNTACQSVLAPRNGR

WSEWSVWSVCTKGCSGGKRRRHRFCNNPFPRYGGADCAGDREQEESCNTEACPVGISCHH

IQSMAQSEKMNLHNGVYTINPTGNKPMPAYCDMSRDGGGWTLLVTSHTNTWTSQNVLLRN

EDTPQLKNDYSILSHADVIKDDLNIAGESFQYRLEAEKPGHWGGVWKAPRSYSFVSTDNK

QTAVELTTRFDNWQFSDSGIENRMPWVADARLTTSSNANSNWWGTITGDDKNYHPAPWIN

SHLASSQPTHIWYWIREGMYQLPRSCMEVQFRGLQTNPAKDGVYTIQPAGKKELKTYCDF

TTNGGGWTLVAASTSHSGWSKENVKERNVDSPSLDADFSILGSVDVIKDADQSKEFFQYR

IEADGKKRWGGIWEAPRSYSFVEPCLKNESVTLVEKFDSWNDGGLANNMPKINLSPNVFL

GAGVVTGSIIHNKDKSQGAYLAQKPHPGVVRYWMREGARRSCNDLKLHGVRVGNSYQDGF

YMIQLKDKAQYLPVYCDMTTEKGAFTLLVTSAHNGWTAPQVLSRNKFNPSLSKDYSILEL

GDSIKSLSNGDFFQYMMDANGRRHWGGIFEAPMSYSFVATRSDQTKVNLTKKFDSWQYSW

WKSLNKRMPWVVASGSNGKALLTTSDSPTYYPSGSILWEGSDRHPADWIWDGGMRDPGVI

WYWVNEDDCDADRKPVDGGLSAWTSWTRCDKLCEAGKERRLRACDQPKPRCGGKKCDPSV

KTVEERDCHYCPESPIRSTKGHYCVVPDKASCSAAELEDSFLVFKKQDENCTATEATFVF

DQDGVIHHKCSKKIVCPEGGSAWYSKLVLKDKCDLKASRHVRLPGNVLKNQGTGQCVHPY

GGYQGEGVKLTYWPGCDATEKMSLEFIKLDPPK*

>TRINITY_DN39201_c0_g1_i2.p1

VNDGFYRRQPVYGPAWQRRDQAPLYDGGYPRQPVYQDPYMREYPRQPVYRDPYPRQPVRD

WSREQMPNREAVSQRDSAYKVPAPRLRSFDNLEVSQLNDISRESVQQQDSDVPCALFCEN

GGTCVNGACKCKPGFEGNLCERKTCDPPCENAGQCNRDGTCDCTPQYTGSHCQIAFCTTP

CQNGGTCHDPVRNTCNCPDGYGGRLCEHAICKQFCQNGGTCVEPDKCECTPGYDGAHCEL

TLCSDGCSVGGVCEKQDDGRLRCECRAGFSGVDCSTENQCEMASNMGVSDKLLRSTLHAV

KNNLVDWTGDAASTTACVNYLEILDSSCSFSNTTLNQQECERQCRPDETGQVCAKLWDPF

SFNLKPATTSRYVYNKVTMVCEHVQYLGCLGSGNHFESLNECENACTLVAPNLKAPGTCF

VAGNGHYHTFDDTSYDFYGRCSYHLVFDQDKKFGIILNHDKDCVKNRPCERTVNIEIENQ

KIFLGKKVGDDFDVQLNGKSIALPHLSSRPIIKKVGRYVMVKQSDDAYLYFDGSQDLVVK

VGESLQDRLLGLCGKYNGEDWDDTTDPDGHLEKDIETFADSWRTEGDSCPSQACAFGSDA

DRKAAKTQCFNVLMSDAFKACRPIINTEPFLKMCEDEMCSC

>TRINITY_DN4009_c0_g1_i10.p2

MSAKKVQEEVDESNGHRRVFKFTQPIPIPSYLIVLVCGCLEHGKVGPRSTVWTEKEMLEA

SVKEFSRVEEQVSTAESLTIPYVWGIYDLLVLPPSFPYGGMENPCLTFVTPTLLTGDQSL

INVIAHEIAHSWTGNLVTNKTWEHFWLNEGFTVYFERMIVAIMDGKTTEEQSQIRDFAFI

GGWKALEEAVAQFGADHPFTCLVVNLKNIDPDDSFSTVPYEKGSCFLYYLESLVGGPTAF

QPFLRDYLKNFEYKSLTTDEWKAYFEGYFHDKADVLKAVDWDTWLYKPGMPPVNMLEKYD

KTLQVPCTELCSRWVKAKEEDLPSFSEKDITDFLPSQVIEFLALTLQENPLPISHLGRMD

EVYKFDETHNSEFKYRWCLQCCRSEYQKYYPSVTKFITVQGRMKFIRPIYQEMNRHESSK

QLAIDTFEAHRSFYHPIAAQQIAKDLGLE*

>TRINITY_DN4056_c0_g1_i3.p1

MIRSALTFLLCFQVIWSQQDVCDQPMIKTAQDGIPDSALASTSNINDHHGPKEVRFIGGD

AWCPDTKNAQPPHILTIDLGSVRKVGKIATKGRQSVKPMYVKSYIVRYSKLGIVYTSVMD

PLNAEMEKIFQGNVDRDTSVYNSLHNSQGLPLEARFIQIIPLEFERLACIRLELYECAAA

PVTTTQPPQVPTTTAAPPAPVTTEAPLDCPPGFQLDTDNVTCVDIDECSLDVMPCNQLCT

NTNGSFVCSCKPGYRLGSDQRTCQNIDECSDKNLNKCTQNCHDNEGSYTCSCRSGFKLDS

DGFTCNDIDECDLDTHSCDASTTTCVNTVGSYVCRCKSGYKKGSSQFKCVDIDECSEGLS

ECDIHSSYCHNLIGDYECLCRKGYERDTKLACKDIDECAQPDKGGCSDGCNNLVGGYECT

CPSGFELDGSGKNCVDKDECKDNNGGCQHTCVNTHGSYHCTCRPGYKLSGLFQCVDINEC

DEGSDQCDANSTTCKNTVPSYECPCNDGYKPIADERYKCELKTCSALIATAGTSVSPAKC

LTNDGNKVGEKCTFSCQAGYELPNPGADTLTCLSTGLWDGALISCKKKVCPALSAIANGS

VQPSRCTTSGHEFGESCFYTCDNNYVLQGNNSKKCQADATWDIQKDPTCVKFEPAPYITC

PANVHTQLLSGASEADVTSLWKDPTSNYQDSILLFPEKYRQNLVFPAGRTTVTFEASNNI

GQKATCSIDVVVEDKEAPTWDACPNDLYETTTQNTATVTWTEPTASDNVKVASQESSKKP

GDSFQIGQVTVRYTAKDPSGNKGECSFEVNVKKAECPDGVPPDNGALTSCSNFGGSKFCS

ITCNANKKVFFTVSSVYCDVNTLKWTAIPDCVDYVALPADGCPVGMVKQTASGFWPAPEN

ICVKCPRGTFYDSPTKSCKKCAVGSISSAEGSLQCTQCPADHSTLEEGSKTCTALCKPGS

YSPSGFALSDLGQQCVHCMKGYYQNQAGAKSCDKCPDGHTTLNTGADSAAKCGVAPKITS

FGPNPVKAKENQATKFECRASGTPVPNFQIKQIVPAPDGFGGPVTIENILNDDGSLAGIR

YVNSKVTEHDKGRYECKVQNSFGTVYAYLNVEVELDFSTGRRRRR*

>TRINITY_DN4189_c0_g1_i2.p1

QANANVSRLELTVSKIRKEIELKDMSHRDSDTKVLEMDALLKASQDRSADLRSELEVGNR

NIVKLDQENKSYQKRVTELQHDVTQLQRKVGELETVNRKIEREKKELKEELIASNTKLGD

LEMKNEYDEEEIASLKRQLKEASKKSPNASLEDYTKQEKQLVELKILCSSSQDKVKEKDN

LIRQLQDTRAYLHEQVESLKASLAATDIDYTKLKKEQADLQKENLEERKKANEFQSDLKS

IALERSRLQKERDANLITITSLEENIASLTQTNEAKKDKLSELRLQLDSLSDKHLDFEKR

NSELQSKNDRYEREATTRNAKIEELMQGRDALLNDNEVLKKNLRKLQGDYDAILKAKDKI

ESSHKITLQESTVLQATHDQSRDETRQLQDDIEALRRRLAAMETTNIELKEKEKDLQNNI

LHQQSQVSKLESIHETESERIIELEHELLGVKAELGGATEDRERALDDLDRATGEVEDKT

RRVKQLERQLDNAIKDKKALEVQIEESIGVVSESKEQLLNAEVELQGFLTTPDGDTDQEL

KTITSERDDLRKEVYVLREELSSTKGDLDKVQKKTDELEKEMFLMKRENTELEMKLQALT

KDNEDLNRELIKDQKKVTVMEQDLHRMMNEKNKLDTALDDYKETVDKMRDSNLALQRQIH

EMRSNMDVSERSIEEKNIQLEWYTTTNKSLGEEVTGLKQKLAVLREESDKVKHENAEISF

KVHELESKISELEHQLESGKQEKEKVRKEHVGTKASLSEYKNNYLTTKKDADRLQNDFLS

VSRKVAYLEARNGTLETDKDRLKKELIVVKGENTDLKAQCEAHVKEKGRLRSEVTRVQKK

NVEIHTTLSSKQDKQKVSEATLSKRFKDLDDNYQKVLKDREDTERKYLDVARKLSKLEAE

HGDCGRTAEQLQHDVSLKVKRIDVLEERLTNFQGREMVDEGEYKTLKKKMVTLEQELQSY

KSKVYRLEAYKTSYEDNLASLQDELLAAQQRVALAEGALKTNQDQCAAQQRELLQALKKF

TEMESAYQTTNTMKVDLQRAVENKQNKIATLEEDLQNLKKEQAQMKVSLEQTKGRNTTMR

GEITKLQKKLLEQKTYYEEQIRELSGKEIIIASLQEDNDSLEKDRADLKNELESVKEELE

RTLLENRDTSLDLQKLRLQHSELERTLKDENERLKMELASLQTLYDEIRVSKEEDIVVQN

AESSQVEALPDMFEEDVGEDIESIKIERDRLVKEQASLTERLAIQETSIETLKRERNTAR

DHVTQLQKSLSEKGIETNMLTEEKQRLILELEVTERKLRELNDEKAEWTDEKDSLIKEVE

EMQCKLHELVLKSQQEKVSEVPSEQIFGTMEADFKRLQESEAELQVELLAALKKVSVLEN

ELNAEQERSRSLEESDRALEEKLACSKEEIVHYQEAVSKLEADYETVEDLNEDLQSKVQQ

LEEELNAMKDSNKLSQENKSQWENEVTSLRSKIKKLEGQVEDERRAKDTLKAQLQEYKNI

GDKASREFADHTDELRSELDRCRADISNKERSIREMQNQLSSLDEKIAKMSRDKNDRERA

YQSHISELDAVNQQKDDMEIEINTMRGQIRTAELLRGEAEKDKEDLRTEMETLRNKGDDA

SRDMNSQLKTLRDQLDKTKRDAVGKEATMRDLREQVANTDHELQLLKKNAQSKESDCEDH

IRELEDANKKTSQMEINIISLNNKISKLEIQVETERKEKSNLQAQLDSSKVKSDQHAEEQ

AKFVSELQVSVDSSRREIRDKEDKLEDVKNELELTRRDLLSKDSQWKSCTEKLEVVTTEN

SELRIELMSLREKIIVLEGDADKEKVSKESYMRQLNDVKNQGESDNQFMSEQITELNVRL

EKLGRENVEKDNVVEKLRFQNASSEQDIEKVKRDLNNKKTECDDLGREIDKLNHAKSEDE

VEISSLRAKILQLERHIDEFRKDKEILVTQVETLKESSDSETVVLHEQITEIETRIEEYR

TEIIEKETIIEKLRVQVINNDNELGKLKREVETLQTECDGYIREIEKLNQEKYEMDSELA

DVRNKYEMLVKRMDDERSERDLTESETVQMTEKITHIESRVEVYKLEIIEKETLIEKLRI

INESNEQEVEKLKRELSNRQVECDGYIVEIEKLNQKLAELNLDFNYRCNLTLKLESQIDT

EKKETEIKLKTLRSKFEDEITTLRRELETNQLECEGYIAEIERLNQEIFRLKGLSPSEDT

VVREVLVAQESMPSESEPSSHTQLTFDVKEKPLEVSSMSLSPKRMVKVRNPFMPQSATKT

ASTKITRIQQSTDTRLHAKGDQTGEGQKVSMAGTSPSTIKIRHIESSSATTANQAGIKTA

SENTKKQTGGPVVVQLETEKVFTPKLTVDGGGEAYSTSGFQQPYSPKLTVDGAGEAYSTS

GYQQSVTETVLDRRSLSPRLTVGGGAQAFPTSNYQQSVTETVLERRSLSPKLTVGGGAQA

FPTSSYQQSVTETVLERRSLSPILTVGGGAQAFSTSGYQTSVRVPSPVQFEEFTRIATTV

TATTGTKQDIKSKRAPQEQ*

>TRINITY_DN4279_c0_g1_i1.p1

MATQGSHVSTSAILLDHKAPVNAVAANGLTPLHIAAHYGHVDIAQLLLDRNADTDARARN

GFTPLHVACKKNREPVILLLLKYGANVHSANEGGQTPMHVATYYGNVTLVLLLLEHGGSP

DITNMRGETALHIACRRREIAIVRLLLRNGAAVDAKTQDRETPLHIAVRTKNTELVNLLL

DHGASPDVIDKNKCTPLHTAARDGNEEIVEILLEHEASLTALSKKGFTPLHEAARYGHVR

VVEMLLRFYETPDPEGKHGLTPLHVATHYDHSDVATLLLNSGADKDAKAKNGYSPLHIGG

SKNRIAISLLLLNRGVDPDTVTKTGISPLHLAAKEGHVDLCEQLIEHGAFPGITTNNGLT

SLHLAARENRVDVAKLLLKYNAPIDAQTVSGFTPLLIACVYGNYEVAELLLQNGANVEAQ

TNKGYQPLHLAAQYGHELIIHLLLKYNAPPDAYTKDGYTALYIARRVMKNTTIIETLTKV

TKVQQIITLIKQPGEEDQEPLEGEAIVFSAEPEELEEEEEVLEALELHEEEAEPHVADES

IDRYMTMEEMDMGDDKNNRESGLFARYSGSFLDKTPLGGSQSSDLDKQENIVISDVSENI

VMTEMTEVESSLDPNSDLPSSLANMSADNVMSYEPPITGGFLISFVVDARGGKMESSQTG

IKIVLPPKSCQMPSRITCKLHRLNKPTLLPPLKEGEALASRVLDVGPTGLRFLQPIYLEL

PHFAALRDGERELVVVRTEDGGWNWQEVSVEDMQGVNGYSGDMNEGFLPSKRYSRIVTPD

FPERFAVISRLKKEAFSVGARGLVMKSSVVPQVQVSVPEGAVTKDTDVTMQVLPVDESFN

DMEEWLAVSSVVTLEPLSLAFKKPVQVTIPCPLHSGSHEGDMQPSLRLLCCFPEEGKPNR

SNAANYQWRDITDSTPLTVMNECARFSTSQPARYWLIETRNVENVTSDARLLYRKLSAVP

YLAKFVVYAKVSLDGQEVRLRVFCITDDKTEKTLEGQTGYVEIARSRDVEVCEGRPIYIK

CLGNLAPVQREPLQLNVTAFHENRLSLNLKVVDSSQPLTCRMAFLKEPRKDRQGNVHAIC

NLNIDASEESLKKADAAHRLPDSLLALVGQEVDADWVALGQQVGFEDIELQEISDSQEGL

PHQCATEVLTKWRDKNESGANMASLEEALRGMGREDIADNFKKLAYASYAKDVGITVIEK

RSGDSRDSEQAPGEADSKRISEFLAAANGGDVMFDSGSPGPGDEAFSVEARPDSPAEEAK

DLEGPERDKIIQEMFANDKGVLDFFSSDAHPDGETEI*

>TRINITY_DN4382_c0_g1_i10.p1

MVKRAAVSWSWARKAAIKKQRMCALANNGRTMSTVSQASSLVQRLSTWASSWTPPRASPK

AFYGECWSGPDGERDYKKYGNDSSCVMELGKPGCDKEAAHVCVGEQWTNYVYRLKAPQLP

VVKGFVVNITRVLQVQPDSTHVGLIVFNEHVKTLITFNDTDKQSPQAVEEALQPVGRGHG

TNTDKALKAADQVFTQDKGDRANTPNVLIVITDGRNRGGSLDGPLDGLKKKQVKILAVGV

GIKDPDELKQIALGNEDHVFQVDKFDELNSLLQRILDSSCPSASA*

>TRINITY_DN4382_c0_g1_i17.p1

MMKAVVALAIFALIAVASAGDDPMEGVKCEVTWEKVGCFKDKRNRALPELLLNDRDKNSN

ANDGHTLNWNEWEKSVHSLACRCAQKAYDKSYKVFGLQFYGECWSGPDGERDYNTYGEKR

SCIMELGKQGCDKEAAHVCVGGQWTNYVYRLKEEKPDLPTDGGYTDWGAWTECSKTCGGG

SRMRERTCTNPEPSNGGKDCSELGPAEESEQCNDFECNHQLKHATCEITWQKVGCFKDGR

NRTLPELLVNDRDNNSKANSGQRLNWKEWEESLYSLACRCAQKAREKGYKVFGLQFYGEC

WSGPDGERDYKKYGNDSSCVMELGKPGCDKEAAHVCVGEQWTNYVYRLKAPQDILLGDTS

L

>TRINITY_DN44558_c0_g3_i1.p1

MAKSGVKIDEDVKKAYNDMKMDKKCSYTIFAIEDKKLITVETRGPPYPGGKNDNVEENIS

KEHFEEMSTVVKESKKPRYIVFDARAGSNKQKIAFIFWCPDDCGVQDKMLYASSKDGFTK

VLDGIGIKIEAHAIDELSFDEMKKDVLK*

>TRINITY_DN47372_c0_g1_i10.p1

MKIALVLLATVVLLAGSLAKNKIPGCSGNKKAVCKRLQEKTKEFNACKEEKKTLQEENDE

LKKQNGDLQTAKDDLMKENEDLKNQLAECQKPTPPPEPVAKNCVELLRAGNSLSGRYNID

PDGKGAFEVYCDMKTDGGGWVLIQRRQDGSVDFSRGWDDYKNGFGTVREWWLGLEKIHRL

TSQTNNELRLGLIDQDGKSAQALYSGFKVGGEDTGYTLTVGPFAGGTAGDSMSVHNGRKF

STKDRDNDLSAGSNCAVSLNGGWWYSGVEKCADANLNGQYGKNVFYRSWKGEAYSLMKTA

IRVRPVA*

>TRINITY_DN49056_c0_g1_i1.p2

GPADESRECNKQPCPIDGAWSEWSSYDSCSVSCGGGVQSRTRTCTNPAPQHGGKDCEGPA

DESRECNKQPCPIDGAWSEWSSYDSCSVSCGGGVQSRTRTCTNPAPQHGGKDCEGPADES

RKCNSQPCPIDGAWSEWSSYGNCSVSCGGGVQSRTRTCTNPAPQHGGKD

>TRINITY_DN492_c0_g1_i1.p1

MWRAQAGSNIQVDVDEDDDWETDPDFVNDVTEQEQRWGAKTVEGSGHQEALSIKSLREGV

KDDHAKFKQAESESGPKASYGYGGRFGVEKDRKDKSVEGWDYEGKVDKHASQKDYATGFG

GKYGVQKDRVDKSAVGFEYEAKMSAHASQKDYSKGFGGKYGVQKDRVDQSAVGWEYEGKT

DKHASQKDYSTGFGGKYGVQKDRVDQAAVGFEYEGKTDKHASQKDYSSGFGGKYGVQKDR

VDKSAVGWDYEGKTQDHASQKDHSKGFGGKFGVQSDRVDKSAVGFEYEGKTQDHASQKDH

SKGFGGKYGVESDRMDESAGTFDDMQDVKSTYRTDKPRSGSGAASGLKARFENMAKQQEE

ESRKQAEEERARREAREAREREVAEKRHAQQQARDKEEEEEESRRQAEEDAQREAEAEAE

AEEQARREAEAEAEAEEQARREAEEAEERARQEAEESARQQAEQPAEDLYEEVEVEDRQP

PTAAGDEQDSGTTAIALYDYQATGDDEISFDPGDVITNIERIDEGWWMGDCNGHRGLFPA

NFVEEQ*

>TRINITY_DN5029_c0_g1_i8.p1

GDRRDALLARRANIKQQSDERRHKLEESRKLQQFERDADEVKAWINEKLKIACDESYKDP

TNLQGKMQKHQAFEAELNANEGRLDAIDASGKQLIDDEHYASEQVQERLDELHELWQQLF

SKSKDKDRRLKEAAQQQQFNRGAEDMELWFSEIENLLNAEEDSGKDLSSVQNQKKKHAML

EADVIARVERIEEVNCAAMNFAELDHFDAPTIVAKKDNLNDRYQSLQGPLQARKARLENA

ERLKKFHHDVEDEEAWIREKEPIVSSPNTGRDLIGAQNLAKKHQALMTEIAGHEPRIKAV

SENGQQMIDEDHFASDEIKEKMDELEQKWDELKDKAANRKGLLEDSLQVHQYLADVDEAE

SWLQEKEPIVTSDDYGKDEDSAQALLTKHNAIMSDLRAYDSVIDGLREQSAECKPVPHIA

DVSDKECVVALYDYDEKTAREVSMKKGDVLTLLNCNNRDWWKVETSDRQGFVPAAYVKRI

DPKHASQELLAQAPEEDSVQQRQQKLDENYQDLMNKGEERGKKLEDAINRYTLLRDAHEL

ESWINDKEGLVTSEEVGKDFEHVEAQQKKFDDFQKDMNAKEVRIRQLTILTEKLKEEHYS

EYQMIQEMIERLTQKWFHLKQLAEQRKENLDSAQEIQRFHRDADDTKAWISEKDTALSTL

DYGRDLASVQALQRKHDVLERDLAALEEKVRELNVEAAKLMATHPGSAQDVESKRLELEG

SWAGLREQAAARKGKLLDSYDYFRFLNDFRDLTSWISGIMALVTSDELAKDVASAEALLD

RHQEHRAEIDARDSTFVAFEEFGKELLEKEHYASPDIQEKLDTLAQNRQELENAWAARKH

RLDECLELQLFNRGAEQLEQWMAAREAIIQSEEIGEGQEGAEALLKKHEDFTKTVAVQEA

KIASLQENAEQLIDKEHYDSPAIAERIQSVLARWATLKAALVERRSKLGESKTIQQFSRD

AEDIEAWISEKLQTVLDESYKDPTNLQSKFQKHQAFEAEVQANEDRVLETINLAEGLIEQ

RKCAGSETIVRERITKLQTQWTYLESKTREKGQHLKEANQQQQFNTNVKDLDYWLGEIEA

SLASDDYGRDLASVQNLIKKHQLVEADIAAHEDRIGDLQAQTQQFVEVGHFDADSIQDKS

RGIVERYGEVTHASEDRRNKLKESNSLHQFYRDIDDEESWIKEKKLLASSEDYGKDLTGV

QNLRKKHQRLEAEMNSHEPRIQAVIACGQKFIDEGHSSSDEIKARCDQLQEKWDELKSLA

DARQHKLDESLTYQQFCANVDEEESWINEKNTLVGSDDYGDTLAAVQGLLKKHQAFETDL

EVHRERVKDIESSGNQLIEEGNHQAESIEQRIDSIKGKLTELDRMASYRKSKLNDNSAFL

QFNWKADVVESWIGDKEGIARSEDIGRDLSSVQTLITKQETFEAGLQAFENEGIARVTSL

KDELVKSQHEQSPAIIRRHDDLIRRWEELLEDARTRKERLQHAQDQYKKVEDLFLLFAKK

ASAFNSWFENAEEDLTDPVRCNSVEEIRGLQDNHAQFRASLDQAEDDMGALKRLDRQIKS

YNVSINPYTWFTMDALEDTWENLQKIIEEREDDLRKEAQRQEYNDSLRQDFAQHANGFHA

WLTETRAAMVDGQGDLEDQLADIKRSSAEVADRKDDLRVIEDIGAQMEEALILDNKYTEH

STVDLAQQWDQLDQLAMRMKHNLEQQIQARNTTGVSEETLKEFTIMFKHFDKDKSGYLDH

QEFKSCLRSLGYDLPIVEEGEEDAEFRSILSVVDPNGDGVVSMGEYMAFMISRETENVGS

SQEVESAFKALTEGGKRLYVTEAELYQSLTKEQADYCMERMRPYVDDKGREIPGAFDYKS

FCEALFSSS*

>TRINITY_DN502_c0_g1_i3.p1

MSELADKLARRQALNEDEDMPRRQVQVFNPYTEFKEFSRQQIKQFEKKFKSFDVDNDSFL

DLMDMKRMMENLGAPQTHIGLKQMIAQIDEDHDGKVSYREFLLIFRKAAAGELEEGSGLS

ELARLVEVNVDEVGVGGAAKFFEAKVKQQSDSNKFEREIREEQEQRKREAEEAKQRKQAF

KQKAALFGTH*

>TRINITY_DN5031_c0_g1_i2.p1

MSTARGRAGGELKQRRNSAPSGSRARSVRKPDDILRDVRGLKLRQRVSLVLNDKGLRDEL

EDIVDTFVQNGPKSNADGFRTYQDFLIPSSTFYNPGLASGTHPISDIRGSESLNYSKQER

LLRCKLASVYRLAELFNWTVGIYGHITARATTGEDHFLINPFGLLYSEVTASSLVKVDKD

GNIIDGGSTCLGVNKAGLVIHSVVHCARKNVKCVIHLHQHAVTAVSMMHQGLMPLSIEAL

GLGEISYHDFQGITVDEAEKESLANDFKENSKVMLLRNHGIVVVGDTIEEAFDIAYNAVR

ACEYQVRAMSAGVDNLIKCNEQTQEQVAKVVEEGVDTSGASWKRGELEFEAYMRMLDSMG

YKTGYVYKNPEIFQGDQKADRMVATPATVTSTRSRTPYYTPEIERGPVRRTHSTGRANTY

RNRLKWLNTPVKSTEYKKEKEKAEINEDYEPAIIKDLQPEKEDKDVEIRNKQEVAEDIVL

PMTKVTEVESAPYDKGFFNGEADIAVKPDGEVDGRADTAPADQGAIELKAELSVPGAEEG

ISPRKKKGTKVKKNPSFKDKIVKRFGRKGERPKSERAEQGETANDKAE*

>TRINITY_DN507_c0_g1_i17.p1

FSKSGNQGNQWQQEKDIRLSGSGNKQLEFEGITGSSYTGDAAIDDVRVYDCQAPPPTPPP

PPPPTTQQPPPPPVTTQAPPPPPGGCGVSPISRVIGGVDAKPGNWPWQIALMMGGRFGCG

GSLIAPDWVVTAAHCVGSSNPANYQIRLGDHNRNVNEGTEQTIPAKRVIKHAQYNKPTPI

NNDIALIQLARPATLNSRVQTVCLPSHDYDVPTSSRCFITGWGKIKHPGSSHHTLQQAQM

PPVKKDVCAKKLAASPGGSSLTITDQMLCAGVEGTILSGCHGDSGGPYVCQNSAGRWVLQ

GAVSWGSPRCSAKERFTVFARVAKFRNWIDQLTGGSPPPNSPPPNTPAPPNTPAPPAGFS

CNFDTDFCGFTQCKNDKFDWTRRSGSTPSSGTGPSSGHGGSGSYAYIETSSPRVRGDNAR

IYRAISLSGSSCLSFYYHMHGSSMGSLKVTLDGTQVFSKSGNQGDNWIHFQTRLSGSGNQ

ELVFEGITGSSYTGDAAIDDVRVFDCQAPAEFNCNFDTDLCGFIQSTAEQFDWTRQNGGT

PSYNTGPSADHSGNNGYYVYIETSSPRVQGDKAKLSRTVSLSGSSCLSFYYHMYGSDMGS

LKVKVGGEVVFSKSGDQGNQWSRIQVPLSGSGYKLLEFEGTRGPSWAGDAAIDDVRVYEC

NGACGLRPNTRIVGGVDAKHGDWPWQVMLRSSSGSQFCGGTLVASEWVVTATHCVKNKSP

SAIFVRLGAHKRTSRLEMQLLTTCVGTEQDFGVTKVINHPSYHSPLRYAHDIALLKLDRP

AQLNKHVSLACLPDGVPDPADGTKCWITGWGTLSAGGSQPEILQQASVPVVSRARCDQAY

PSEIHDSMICAGLDQGGIDSCQGDSGGPMVCETGGRY

>TRINITY_DN51412_c0_g1_i2.p1

MSSKPKGSLSNPALPGKQVDLTKASTVIQAYVAIILQQPDLKLTALPDLPSHQKTARDHA

QSWNDNILPLMAKTIADIIDYANKFDSFYEDLVKFAKDIKNPDSKKNLIEGLNLLLSTIQ

KKDANVETVINDLSTFQKNLNTDYQNFTSDVNTAAVKIEGDSGEIKALSKQLDAIQDAMN

KDIGLMAGGAVVILGGVAMIVFGALSEIPSGGASTALIGGGVLVVSGGVIMETFGSTDYS

KQIDAQKKTQEKLAGVKIELAGLKTTKGQVQGFVKGLAAAITAATSLKAAWQTLDADLQE

LITAIKDVDPSVPQTWLLDELDRAKRDWKDALDQAKNLQPDGKVPTKLYKNLQDAFKEAK

PPRQA*

>TRINITY_DN5412_c0_g1_i4.p1

PAPEGVAASIPRLAFRLIASVSHVLSWRLLSWHHNSVIFDRMSALNEIRRNLRGKLYEDP

DFEASDENIFFSQKPPRPFVWKRPHEIVDDPRMFVGGASRLDIKQGQLGDCWLLAAVASL

TQFPSLLEKVVPKDQGFSKAEGYCGAFRFTIWQEGEWTDVIIDDRLPTYNNQLVFLHSDE

KNEFWSALLEKAYAKINGSYEALKGGQTSEAMEDFTGGLAESIDLKKAPADLFRTIQKAL

SKSSLMGCSLNAVPGKVEAKGPMGLVRGHAYSLTGANKVNVNARGRQIEAELVRVRNPWG

NSREWEGDWGDKSPLWSMIDDSQKKEIGLVFDDDGEFWMSFADFKKYFDKLEICMLGPDS

ADTGCGKAWEGRMEQAKWVYKSTAGGCRNFLDTFWKNPQFRIELKDPDDDEDVDNCSFVV

SLMQCGRRKLREQKKGMLTIGFSIYEIKGDAKVGPDGHLDMNFFKYNSSVARSPVFINSR

EVTGRYSLPPGDYVVIPSTFNPNEEGKFLVRLYSEKPADTKEMDTETKTPPAHERRPKLT

KDQKGALNSKFYDSFLRLAGKDGAIDANELKEILTKVYGGGHDFSLEVCRSLLSLHDDDR

SGKLGFEEFMEIWVLVKKWRAVFDKYDKDKSGSMDLYELRAALSDLGISMSNKTTNAVCV

RFRNAQGTIDFDTFVQIIARMFALNDAFDDNRMGSKASFSREEFIGRAILL*

>TRINITY_DN54326_c0_g1_i2.p1

FFWGSPANSCQPCDCNEAGSIGLQCNRATGRCQCKPGMVGEKCNQCAPDTSGRMPQCKVC

GECYHQWKNTLEYLSLNVTTEIGEVGNVSVSGPINVYTYEKEIKELKKKLKKIEIIAGNQ

VTSEKDTSTIRDKLDSAADKIQNVQDRILEIEKELTTIEMQGNVAKAEVRILRERLGNLV

RDGERLKDDVEKIRSKDIGRAFENIRKSENISQKAGNVIKDSKAMTSESLERRVEINRIL

AGPPAFRVQVNISMLSMDDIQKRIETLLNQLDLLNSVVCGADQNKCGTCGLANCTACGGP

GCNGSLELAKGALLQARSAERAQREREVAANATLEEIQRAEVTVNMTRQEAESALLRAEE

ANQQAINATLTMDELIKDILEFLARKYPDPEKIRALATRVKNLSLSVTEEEIKKLSIDIE

KALSSLTGIDEILETTARNLTGARNLQKEAEEARERARTLPAVIQSVADALARASEGQRM

AADAIAKAREDIAMAGTFLDKIYPELDGLQQRVSSASHDLAQMRLRVPSVLGHLQENRKE

IAATETLVQQAMNLSQNAKKESGILQDAFNAAKFKIEEKTAVVKNGTARMKSFKEKANRL

RDRLEYHLTKIIEIENKKITYDALVEELKKEQHDLGDLVKRIGRCYALYRGCNPQNPTFD

C*

>TRINITY_DN5487_c0_g1_i3.p1

MESGSIPDDNITASSCPDGVTPSMGRLNVGNSWCAGDDKDCYLQVDCGKLHLVCAVATHG

NRAPDSNGDYVKKFKIKHSNDGEHWIVYEEPLEQQSGEVREVQETTADQLGASDDARRLY

EAMKGWGTDESVLSEILCTRDNAELAAIRQAYAERYNVSLEEALTGELSGNLRTLLVELA

KGERDESIEVDAALAESDAKDLLAAGVQAWGTDEEVFIRVFTQRSLLQLSATFTAYREMG

SEGISDSLESEMSGHLLTALLTIVNRVQADPVKFYADQIRKALEEGDWAAVERIVFSRSK

IQLDKICTSYLSSYGSALADDVNMMYHGNNKVALVEKIDRTKVLVQRIFEGNSDSHSVKR

NDFKQPVITRFIRFCPLEWHVWPCMSVELYGAQVVEGGASPPPDDEVVSAEQVEEVETVP

EPVEEDIQVVDRRKEIEEEHRKRMEEIENRIKEQEEKRKQELEEKRRAEEEERRKMEEER

KMREEEAARKREEERRQLEEERLKWEEERKKREEEVRQMIEEGRKKREEERKKREDEHRK

KREEERKRREEERKARLEEEKQKLEEARRKREDEFRTRMENSRNINIDVAVAQEAPPDDD

ASTKPVQDDRKKKEEFWTKKVRDPVVIEQEMKQLRDEERRRLAEERRKKEEEEAERTERE

LEITGEWRAKMEDTRPERLDEKWVIEYRLKAMEGERKRREEELLKKEEEERRKRQKEEDE

RLKALAELAKKTDEQRELFRKQREEEERKRWEEEEARKNEEEKRRKWLLEERGRRMNEER

RKREEEADLWRREMEQKQALEEEENKKKEEEERIKQQIVDRKRLEDIERKGLEAERRRKR

DEEQRRRDEEEMRKREEREKLRKKQLEKRMSGEMVRRKSEEDLREREKREEIWGQEMAKR

HSKTFENKMVFITGSPQKGQDTEEVFAQEVSMVMATPVVDDEPQTVTTKRTVTVRTITTT

VTDTRDDQLPTANDTNGEPKAHIVDGIFHHHVGDHRDHGHVHDHDHDDSHDHDHHDHERS

RDWYRRSCCDHLMPLDPAVQDAVESSFFTKYDDLKSNMRPMSWHGGLDLGSALQLPTPDN

PIDDAEIDKLLALEGQGDGWKRVKKTRGLEILRKQGNGPTITKAVITLPGIPYRNAVTLV

TDWSVRNKWDNTFDGVDVVDEMGDSKVLNCTLKNKHHLVLATLEREENRGPLYAMAWQKT

VHPWAVTGPKMSLLRLDTMTCGAVIRPYYGEDASQLTIITQIRGNVPAALKNTHLNGNPS

KWLTRLKKYHSKQYVETKPAKLKDAGSDQIAADANVNVIS*

>TRINITY_DN56015_c0_g1_i1.p2

MSVTSESKDTVKASIDKIWAVAGNWSDFSWILKAVSVKVNGNERLIGYEDGSAVKQVLLE

KNDAGHSLKFDIFDSDPPSKVMAHASKISCEMSLVALSAEETKLHWKTEHHLKAGQDEEA

AKAKIGGLRKVMLDFFKAQFEK*

>TRINITY_DN566_c0_g1_i19.p1

MISIAAIAVFASILAVPASAESQPISPAEYQKIIGQGFTTNWFKSQDPFSKYNDKNIDDV

YSKGFRNLKLRSRADLYDYPYNQAKFKRFLADLKHVVDKCIERGVTPIISWIHHDAEAYA

TEDDRKAYLRWWKVVAKQFKDTDYRLSFNLFNELGVDRCGENCEESLRRRIDKYNKWTKQ

VVEAIRGTGGNNKHRILILGSPGKTGKDLVKIDPEIYRNDPYMMAEWHIYASGPNKKSGA

KEWHGDGSGGGRANVKKALKEGTDFSKSSKLPTYFGEWMPIDNSGGELNEKEVISFARFF

LGEMRKANLPWSLNVLDDYYDTKKSKWITDKRKVGKYKIDMAKVLKTIQEVM*

>TRINITY_DN570_c0_g2_i1.p1

RGSKGSTGDTGPAGEQGVDGLSGPTGEAGSAGENGGRGGRGAAGRSGGTGPVGSPGATGR

QGRAGSRGLDGLNGRQGAPGSPGIPGAPGEAGERGAGGAAGEPGTPGATGRAGASGARGS

RGVVGAKGDKGASGSSGSDGPQGEMGPSGRIGRSGSAGQSGSPGAQGDTGAQGGAGTPGS

RGAAGPDGPKGSIGAQGDAGPSGSRGTTGDGGTKGGRGAPGDRGSPGPAGPRGVTGAQGE

PGEQGAIGNSGREGPAGDTGSSGAPGRRGAKGERGSNGRYGNEGPIGERGKRGGEGNAGP

VGSPGAAGDRGNPGAAGAPGGRGVAGNVGPPGIAGSIGNRGPDGSRGLKGPPGDPGSRGG

SGEPGASGAPGPNGNAGNQGAPGTRGIAGERGDAGRPGSTAADGDAGEPGDAGSRGKTGY

PGPQGGMGAAGGQGPDGRPGESGAQGNPGPVGAPGGQGAQGAAGAEGERGVRGDTGERGT

EGRPGEAGAVGLTGNTGAAGDRGRTGAAGRPGREGDRGDVGAPGDAGLQGSQGAAGTPGS

PGGTGTGGPTGPPGPSGSVGPAGPTGQRGLSGSAGESGAVGEQGAKGERGDQGRQGNNGQ

AGPAGPPGAQGAAGRQGETGSQGSAGNVGPSGSPGARGAKGEAGATGVVGEAGAVGSAGP

VGTPGSQGASGADGAMGAQGAQGSEGEVGSRGDQGDGGIGGDTGRTGAQGQKGDRGSPGV

TGPQGSQGPKGDIGPLGPTGPTGSSGARGDDGDAGPLGATGLQGPEGPDGNVGHSGVKGD

QGQRGPEGPPGIAGPPGPPGASAQAGSLFSSIQDNNNKGPSRRRREAPQERRILDDALTA

VDLVGYRIQLHIKPNGTREFPAQTCRGLHMCYPGLQSGNYWVDPNGGIPNDAFEVYCDFD

ADYTCIYPNQHQNFMTDKRQWFTGSDGYKWLQRDLHGLNMMHYVAESSQLTYLRLLSDRA

RQTVTYHCKNSAAWFNEEFSGFAKSIKIMSGSGVELHAESSKKFKPKVVLDECRIKDGTW

RKTIVEVDTPKPHRLPLQDVAVYDIGDEGEEFGIEIGPVCFS*

>TRINITY_DN5790_c0_g1_i14.p1

RACLLTDYVSIFIVASESHSISKMVGIKLSVVIFALICVCQSKSISKKKPHHKNPAQHKV

HDEKSGDSCSDTDEAYCEKWAPKGYCDNAFEDMTKKCKKSCKMCEPGGPEMDDDSRCHLW

AKEGFCEKVSHQPYMLKHCKFSCKEFIKNNPSAVQNAASGHRVPPSPAGQQGAYGQQGYG

QQGYGQQGYGQQGYGQQGYGQQGYGQQGYGQQGYGQQGYGQQGYGQQGYGQQGYGQQGYG

QQGYGQQPYGQQLPYGQPPYGQQQPYGQYGQQQPYG

>TRINITY_DN5807_c0_g1_i2.p1

MDFALLSIILGHFLLHTDAAIVSTSYGLVRGDVASYPDATGSVKSVRRFLGIPYASPPVK

ELRFKAPEPPQAWKPDTYDARHYRNVCPQTDFFIPAIRKFWPGFTKANFSEDCLYLNVFS

PAENASTPFPVMVYIHGGGYLMGTPVLNPSDQLVLREVVVVTFQYRLGPLGFISTGDSAA

PGNFGMLDQVQALRWVKENIEAFGGDPTKVTIFGLSAGSSSVALQLLSPLSKNLFQRAIS

ESGVELSPWALHKTSDAARYTRLLAKKVGCEEANSKSMVECLRSKPSTSLNDIGMLMMPS

GMRKFMDNPWSPVVDGRFLPDTPRAIRKSGTSVHRVPYLAGFTRHEGSIFLNQTMNAVSG

VSPDLFKKYMETYSEYWSTSKAMASVVSSAFEFEYTPWPDAANSVLLREQLVHFITDTDY

TAPTMAVLSSHSAKAPCYMYLFSHVSRQEKVPSWMGTRHGDSLAYIFGFPFMSNSSKYDD

IDRNVSRFMMMAWTNFAKTGAPTEEPTDGVEWTRFNSSNLAYLEIAGSVPKMERNYRPHQ

VAFWNWYVPKLQNTKFDVEPPTTVSSAARLAPPYAAFVSLLVAHFTLRTLSAVHC*

>TRINITY_DN5867_c0_g3_i1.p1

MSRLALLIILFVGAVCVCAKTHEHAEEEENGDSGSGSSGEMTVEDIDKLTDKEDLEKLHI

DPDDCYDRNDEDCEDRAEEGKCLKDLDNMVKECPWSCRFCARDDGDTKKCIDKEDSCHTF

AQQNDCLRLPQYMKQNCKKSCELCGPENEYQDEDTRCPDWAKQGYCSTNDNIRDKCRYSC

KKYRSARPAPAPYPYPVTTLYPYQWSNTPYPSPYPYPSPHPSPYPYPYPSPYPSPVPYPQ

PQPYPHPSPVPSPVPSPVPSPVPSPVPSPVPSPVPSPVPSPVPSPVPSP

>TRINITY_DN6024_c0_g1_i2.p1

GVKGDRGEGGVFGAPGDPGADGKPGVDGVDGRNGRNGGPGSQGPRGPPGEVGEPGTQGDA

GRRGQRGPEGTVGEPGDAGPEGNRGPVGLKGEAGDAGPQGEPGPTGEPGDQGEAGLLGQK

GQRGRDGRQGAPGTKGSQGPMGRMGLPGDPGQRGNPGVAGDPGPNGSPGDRGVTGEVGHE

GAPGLSGPRGPAGAPGPSGDMGPPGKEGKRGRPGPPGKQGSPGPKGTQGSRGFPGAYGKP

GANGEPGRSGQPGREGSKGETGDSGEPGAPGRPGLKGFPGARGRPGIPGASGPKGMDGEE

GRPGRQGAPGPTGLAGNMGFGGPRGANGAPGVDGSPGRKGARGEKGDNGVNGMTGPPGPS

GRSGQPGKRGSMGSPGFQGKQGLPGLQGPPGPPGRPGVPGPRGTRGKDGSRGAQGTQGQA

GTQGVQGRKGYLGRPGMRGRPGGDGSAGSKGPMGPPGPNGMKGPPGLQGPTGRDGFPGKK

GDPGRKGSPGFPGRNGREGEPGYDGYPGYPGEPGLPGPKGTDGLTGKPGAQGRRGDRGDR

GEPGPQGIPGMPGQPGSRGEPGPPGPKGAPGPKGQKGEGGALGTKGEPGQLGSRGTRGEK

GDTGADGGAGNRGLRGTPGRPGPQGNPGRPGERGEAGEPGRPGSKGSRGPTGKPGRPGNP

GQTGVPGRNGWRGVDGEDGRAGPQGAVGDPGPQGHKGAYGLPASPGPRGPPGFIGEPGTK

GPPGIGGINGRPGEPGIPGPKGTPGNPGSLGEAGTPGTDGEPGQKGESGALGEPGSPGRP

GRQGPPGAAGSSGSEGTKGESGIQGSPGDNGVDGVKGARGSQGPDGMAGNEGDPGDRGSR

GQKGDRGYGGKPGRNGPPGAQGEKGEPGSAGLEGDIGPPGSEGLEGNPGDSGNRGVEGEM

GVVGPRGAPGERGPPGSDGERGDRGPPGPPGAQGRPGQVIYTHVTVGQEKGPGRRLYAGS

EKNSAIGQQSTEKEYQRFENLVRNKIENYKAQMGTRAYPARSCRDILLERPAAPSDNYWV

DPNGGCVSDALEVFCDFPTKATCVSPRNAQQIIVNNVAPGTYMGLVQPEGQLLFEYSADP

VQL

>TRINITY_DN6024_c1_g1_i3.p1

MALTRLISCLLLLCILDNVAAQARCPPPRPQASECPTYEPGDEDDESTCGLVGQAPCGPG

KGCCRDICFNECRDLVQEPTRTQGYGLPGDQGPQGDPGRQGPGGRKGPAGQRGEPGTPGN

NGDPGPQGQPGMPGPRGPPGPIVRVTDPLVDAPVGELVPSPDFKGPIVDIREYRGDPGDP

GAEGRTGRTGARGADGERGETGEVGLVGPPGAQGPRGVRGVGGEAGQPGQDGIPGANGNT

GPPGTAGEPGPEGIPGAVGLRGIKGDQGETGAFGDPGDPGEDGEPGFPGDAGRNGKPGQP

GSAGYPGNPGEQGDQGAGGTAGPPGATGPQGSPGSPGSAGGQGNQGPTGPKGEVGSPGFQ

GPPGEVGEAGDKGVRGLLGASGEPGRPGRPGAQGIKGSPGGMGRLGLPGAPGSRGPPGSP

GAVGRPGRPGERGSPGKSGSQGSAGEMGIPGQSGPPGPTGVPGTTGKQGKPGRPGPPGPQ

GRPGQRGSQGPRGYAGAEGRPGAKGTSGLPGTAGIPGSKGDQGESGRPGEPGKQGGRGAS

GSPGKPGKSGSPGPAGLPGEDGRPGQAGGAGPRGVPGAPGLAGSKGGDGSTGADGERGAV

GLPGVKGERGIQGEQGAQGRTGRQGSRGDRGSQGAPGRAGPQGMSGPVGPPGLPGKEGAP

GSRGERGKDGSPGAPGEPGSQGERGSPGSQGQPGAPGQRGANGVDGTPGNRGAPGNPGSP

GEPGPQGSQGPDGRQGFAGPKGEKGPRGERGTAGRNGKDGDPGLDGDPGFPGSPGTAGPK

GRDGNPGTPGARGRRGLPGGIGETGPAGIPGSNGAPGSPGSSGPPGAKGPKGEKGAKGDQ

GELGSPGDIGPLGSSGVPGAKGDTGTDGAPGFRGATGTPGRPGPQGTPGSAGADGPPGTP

GFNGAKGVRGPSGMPGQPGSPGVPGNNGNDGLPGLPGEDGPEGHAGPAGETGAKGDSGQA

GLPGLPGRQGPPGPTGLPGNSGLPGLKGADGREGPPGFQGPRGSPGKSGPRGEPGTDGTD

GVQGTGGTIGDKGAPGVEGSTGPAGAPGAPGVPGASGPKGSRGDKGLTGKWGANGLRGER

GRQGAQGPQGEVGDVGDNGPKGEAGDTGFTGRTGKPGATGNAGEKGGPGIVGQPGFNGTA

GRDGFQGIPGVNGAPGSEGAAGVQGPPGEPGDRGEPGNKGPDGDPGPVGPPGPRGRPGRL

IYTNVRPDGASKGPGLYSSSKHPSNNADNQMNQEPMPLGMLEWSVIKPIEAKIRDHKSQD

GTALRPARSCRELHLEHPELSSGEYWIDPNEGCTMDAEKVYCDFQQKATCVYPKEAQVNA

TNAKPEQWISESAGNQLFEYSADPVQLKFLRLLSKRVTQNVTYHCYNSRAWEEGQSIKLK

GDNEMELTTSAKTTPTVLKDECQVKDDAWHQTVLAITTKHKDALPVVDVAPYDVGRPSQQ

FKIELGPVCFLF*

>TRINITY_DN60847_c0_g1_i2.p1

MCIAPYLPDIPGPPGAKGPPGVPGDQGEQGLPGDPGPPGFAGDNGKPGAPGAVGEQGEPG

PKGPPGGASGVGGLKGPSPGELQGEKGEQGADGPPGPPGSVGPRGPPGSKGSRGQAGPSG

PQGQMGARGRPGAPGAAGRNGFPGDKGDTGDVGEQGPPGPPGDQGEPGFPGETGQKGARG

AAGAKGYKGEIGQAGERGAPGRAGSPGKDGENGESGLPGAKGKTGLPGPNGMSGPEGPPG

GRGLAGRRGPPGSQGPQGVAGVKGAQGAAGSRGAQGAPGEKGPRGETGPKGLQGIRGRNG

RNGEQGLKGDGGDTGAAGQQGLTGAMGVSGVPGNPGPPGLDGDRGQRGADGDKGVQGLPG

RQGPPGSAGPRGVQGRVGRIGAKGKAGSQGPAGAPGARGPTGSRGDPGSDGVPGDRGEAG

SNGRPGLDGQQGDKGSAGRPGSPGSPGPRGAAGNPGVQGREGKVGIPGDRGSDGATGTPG

KPGSPGPPGPAGFAGAKGATGEPGATGEPGTQGPQGAKGEIGQPGSRGPTGEPGVTGRNG

ERGETGSPGSPGSQGPRGAQGAPGQPGQAGEMGSPGERGSDGTPGTRGERGLSGERGAPG

VDGSPGEPGMPGLPGADGSPGERGVAGAPGAPGVSGAAGAPGSPGRTGSPGAKGDQGSPG

RLGSAGPPGKNGEPGQDGLRGNPGPPGSPGVKGEDGTDGANGADGNPGDRGARGVAGPAG

TPGRPGAPGSTGPAGRPGALGEPGPKGPKGERGDAGSPGLSNLEGQKGAKGIKGQAGNPG

NQGTPGQAGVAGKPGPSGPPGPPGPPGSSGLPGPNGLKGVQGDPGVNGQDGSPGNPGPNG

KDGEPGSPGANGAAGPTGAKGAPGPKGEAGAPGATGQMGARGDAGPQGPTGDTGLPGRDG

LAGDDGATGTMGPPGPPGDDGDQGVAGADGRPGQNGRNGRAGDSGEVGAPGAPGGTGQRG

APGLPGAVGAPGPKGQAGSKGSRGKDGTTGITGKRGQTGPPGPQGQKGYRGAPGAKGDKG

FTGPTGAPGNAGDQGPPGPIGSDGIRGPPGSQGEPGDPGAGGSAGGNGLPGDIGPPGVRG

DPGDVGPRVFILLVYSFCQWPCNKW*

>TRINITY_DN64006_c0_g1_i1.p1

KKFAPSRSKLWIGLERDCSDDDEIYWVDGTGVDYSNWMEGQPDNFGEEENCGHLYLTGER

EGLWNDRPCDSPDESIGFICQKECQNGWSYFDGDCYRVESENGGWRDAVQKCADQGAELA

EATKSNNAYLADLGAKYAPAPKQYMWIGMNRDCDREFRWLNG

>TRINITY_DN68189_c0_g1_i1.p1

MSAEDSEFVQLARIAEQAERYEDMVEYMIKVIKVTKKGQLLSNEERNLLSVAYKNVVGGH

RSSWRVLTSILEKEKEKENNQGAISQVEAYKKKIEGELNAKCDEVLELLENELLTSPTDA

PAKVFYCKMKGDYNRYKVEVADEQNPEQREKLVEESDNAYKQAQDACKEIESKMDPICLG

LALNYSVFYYEIAKKPEKACALAKKAFEDALEELQQNQDSSNSKDSTLIMQLLQDNLTLW

SSCDDE*

>TRINITY_DN70742_c0_g1_i3.p1

QVAAMSNVTNADVQKKCPAFIGGGCPYSSLPQEEKGIAGKCPSFAKGTCPFAECKSVGEF

QDKLSQMRDQSKGDAAHQEFLKAVVLTSQEKAVDLGRACPFASKGCPFSHGKDIL

>TRINITY_DN7289_c0_g1_i5.p1

MSYLERSPYSSGAAEPGLSSVIKRLEDQHLNGDPGTKSPTVPSKIRDIVNKSISPIDGKM

ASSSMGDENRMLQSEVSRLEDLLAATRAERDEIGSKYMAVSERLDQHMKEGSPGQDSSSP

GAYLSRSGELPSPGDSSLVNQVSYLKSKLEEEHTNYKRKLQAYQDGQQRQAQLIQKLQQK

VLQYKRKCGELETSMSESKEHEEGVRKKLESMENSLKEQEAKLKETEEEHSSDLENALIR

LEEEQQRSAGLQHVNNMLSDQLEQATAANQQLTVDIQKLTADWNKAREELEARDEEEQSY

FANEHNRLMDLWKTLNSFRRQFNEMKSSTQRDLSQVRAEVNKSVRVVQGACMDLDKNLRG

MDANTQAALEEERARRQRGEEQLREKVQEHIELQNNYDKEKADLTIKVKELTNLKAKLEA

QLAERDNEVQNLTKKINSMEFGFAKQSEEWESASEAGIAAMREEAEILQNTLREITHAVK

QDADTSSRLFGSPGPEIEVVDASLLEAEDDWDKRPISPSRAARVRSTSPTRARSPAHSDN

ALGMVHSAIRKKNMQVQEMKGKMENAVEMEKATKKQLENAEGEKRRLEKALTAARDEVDA

TRQKVTEASQDRERFKAHTDTLHTEKQNLEKVRQSLHEKSEGLMSEVEKLQAANNELQRQ

RDNLEDDNEDLTREKERLTKEIQRGQQVIEQLEGKQSVLKEDVVQLKEQLSRALLDKEVT

EQEKSHVSEVLSKSELQKAELELEMNKMRSEEVALRDALVKLQSLNEGLGQDKIELNKII

KSMEADKSSLTNEKRELEVEKNSIRQELIRVEQEKVDLDTEKSTLDQNLSIHEASREKIE

QELVLANRERAELGEALNQVTRERDSLHDELVQTQREAERQSGNVVRLAKEKEELTREKS

SLLVQVNSSERENRGLSENNASLKSEKESLETALYELQQTATKLEARKEALESENQELLL

AKEALTVDLQRVRKEKEIEETKLQKEKEMLEQQFNQTRRDGEVAVKRAEQRHEEDVERLK

REKESALLQANQEKEESLTQMKNEKEDLGRRLEKEKGFLVNEVALVQKERDDQLLMAENE

KQEALHAAANEKAALVERLTKAQNDVGNASVEIDRVKREAFSKAEQDKTAISQLQNELRK

TQSKLEDVSNKAQGESGDLKNQIKDLGKVKENTLREVGELKLQLKMVEEARDGIRRELIE

AQRKIREGDEAREGVRKENTDLKRQLKDEEREKVAVQETANELRGKVKKAEAEKTNLKRV

LDEANQKIANLDENRNAVQKEAGELRASLREVEKARLEARRELQQLHNQVKMLDSECLKS

KKEVSDLKDQLAKDEHLLDEMRRDNYNMKQKLVDTDGQKEAAKREIQNLSRKMAEMEEDN

RVREKDYGAALDETRRAEQKALDKVKNLENILDNSNQDNSDLKLKLSGSEGRITGLEAQL

ARVESAKNDLEFKLTSLHSTLRRTLGIKPPSEMGRSPSPTRARSPSPRRRMFGANRSRSP

EKSLEETDGRERPVSPSRRFSPSKSMDASAEIDPETVRQALRDFAQSMKDAERAKEEAVN

RANALQKTIGEMEEERRGIDERLQAMQKTLGEAEEGRRGADSRLSSAQTALMLQEETIRR

LERERKGLNEKITALDTSLAQAEADRRQLRDKVAQLQQTEAKSDQEKEAMRAQIENAESR

LTKVELKKRSVEGDIERMRMQAAESEAEKMALRERIDQLLRAQQDLESRATSLQLTVDRL

TLALAKTEEEEQMSKEKLNELSLSLNDSNATSQTLQEHIQQLQRALTNSEHDRRVMQERL

EALKSAQQDSKNRSNMLQDRIQQMKNEQADAEVRRMELEGQIRQLQQMLRQQKEAEEELV

ARIGKLQEEKRELQDRLATFQRNLAGAEQTKREMERAHVRLEKDKKALKNTLDKIEREKL

ETEEMSSRLREDRDRLDRSTVSMEKDNEELTKQVQNMQHAMAEMEHNHAKKLVEVTTRHR

QEVDTENDRAKQAQSQLEKTQLARERAHKQRVRGLEEQVSTLKEQLSKELQKKQSYINRT

AQKSEEIRGLRSKLEDSLNTVARDSLHEPAVLERESHKLEDSVDGSSPMRRTRSTSPVKD

SSDKFMTSTPAYGSLSGVRRTTPLTSGGRRTTPGVSPLRKTRKSTT*

>TRINITY_DN7368_c0_g1_i17.p1

AALTQSAPLRLASMRFWVLAALLLAAYVSAAPLPEIEEELVLSDEPEVFEDPDDAVEEIS

EDPDWKHYGHHGHHGHRHGGKKHVVATRGEAHAAGSAAGGRAGAAAGSGAAQTTANAAGQ

GLGHGIGHGVGHGVGHGLGQGTGHGLAHGLTDGTSHGLAAGLANGIVDGLYSAAKSGYGY

RIMEGHHRHRGHKGHYGHHGHHYGHHGKYYDEEMEDPAGNTTDTMDTMDTTVARSTWSPP

VERPMLLVALLVDVLEPLLEVELPRPPLMPLDKDLDMESATELDMELDTDSDREPVTDWP

MV*

>TRINITY_DN7696_c0_g1_i3.p1

MRSHHFVLSILLIAAHVNGQDSGGVDTNGSPASKPSDGISVFCKDDGMRIDIEKDKLNGV

KIFDLHLIDPNCRANSNSTHYSLETPLVGCGTSSRYTSKFVVYSNEAIQKSENGESIITR

NTDLTIPFACFYGKEGVTSTYGLKPRHKATVTMDGGDTETRFTLDLSLFHDKEYQKPYGI

DEYPVPVTIDEPLYVQASADIKDKWLEVTADMCYATPTSNRDDAMKYYLIRNGCQQDATV

LFYQAKSTQFRFSFDAFKFVGVPSSFLYLHCHMFVCNVSNPESRCSIGCLREPRKRRAVQ

DADAQLSQGPFILLNDEAKPAKQVAQGAFSNQIMWVVVAMGAFCALCLLAVVYLKLKRKS

PSPDPDRETYL*

>TRINITY_DN7908_c0_g1_i1.p1

MVSATLNGEGYSGSFPLAVKSVEDNIRAAINARNVRLTEYFKDYDRLRTGFITKPQFDRC

LDQLFGIVLSSEDDQTLMGKYMSRDPKQSGMVNYRRFCEVIAADFEPNALNLDPSSQRIG

STASEPVDRRPLSPASLSKCDELLHRMARYYHYHGINIKTCYADFDKHHIGVVTESQFYR

SFPGPPDVTEGETRLLAKKYRDPERAGLCNYYSFHEDISEKQEALADEADFTKLSKNQGM

FDDLRPKRPSTPSLQDIFEKIRVAVYKNGVRTTEFFKDHDKLRSGEITENQFVCGLSLCC

SSQANLTREEIKKVVDHYRTEDG

>TRINITY_DN8112_c0_g1_i20.p1

KGGACPYSNLPKEMKGIAARCPAFKGGCPWKSCKTVGEYVQILTKMRDQHKGKAAVPVNK

FFAKVIEVSKDMEKKLGVCPFMQHKCQFMNDAHGKPIVPK*

>TRINITY_DN8257_c0_g1_i1.p1

MAYTPTLITLGPLPENPGEVNQYSLREVPDSAKEILVYAFVTTHNDGPFQRGYYNMFTAE

SGEIKYAQYMNVATGSPAVTVNSGNMWFPVGNKANGLSAELIHPGKRSIAHKAPAQHCKD

LAQSEWSNVFVIGYR*

>TRINITY_DN827_c0_g1_i15.p1

MTDSGAVKTSDVFVDVLVLPEITVPADVKLTAGDSLVLNCTATGNPAPNVTWLKDDEYYT

QEKKPGMSTIYIESASSMDIATFTCVAENGITDSDGRIITRSEDVRVDVVEPPIIIAAPG

NQVVKVGQSLAITCVANGLPTPHVRWYRNGEDDDRQTSQPGESTLTIVAASQEDAGTFTC

EASNGVVDTEGNVIIRTAGVTVDIVAPPDIVKPENVNIRLTEGESVTLPCDVTGIPDPTV

QWRKPSGELVDEADNDRFSFSGNSLIINDTVGEDEGNWTCEAANPYGNDSMTIVLRIDAS

IGAIGIPTFIGDPTPILINCTFENSVDATVTISKGGQVIKRGKNPLYLNLTVTKKDDFGE

YICSVEDVGERPQKLAYVVSEAERPKKPENVSITTSCNGISISWMAPANGDFEILSYRLT

WGAGDDEVVLAKDRRQYNISGLDADKIYDIILTANSSIGAGDKYRKTVRTDQFCDGGVCD

LRREGDVYILSASKGVWPVNGLCRAFSPNDIGDVENYRVEVKFYNPMDIEGEGRDYFGII

FNAANYKNHDFVFYRPGSGSRSCYHSGRILNGSLHWYGSNSGPCPFGPPKRKRWLHVSLE

VRGSKANLFLDGVHVAAIRGQFPTRGHAGVLLAQHKDNVVHFKDFKITALEPFKFASKAC

SAIVKYPDFHSLIIGDNLWPGGMCRVSMPDTAGSNEYILEVKLFSEASWTGDKVALPGVM

FNAKDVDNFDFVYLRPHWPDDCFQTGYLSEGVFHQGVDTYLQSDCTCIPRGAHWFQLTLE

VRQNGVSVFVDGKHLTTFKPHQPLNASGGVVVASGCRRITRFKEFSITKLAPLPFTPSGC

TSARNLGEKFTLVSGNNYSANRLCRAALPGYSPDSLNYTVAVRLYSKTEPQAVNIRFGVM

FNVHNDSYFEFVYFRPYRRENCVQGGRYERGRVTEYAPKSMSCSYGFLRSGYWYSTKVQV

GNDEAQVYVDGYRAATLETRIATVGRGGVLLVNGYRRMLSFKDYSISF*

>TRINITY_DN8297_c0_g1_i1.p1

LSDVGKIKYIELRRSDGGTWGDWKLDWVEVAKSGSNLRQRFRYNGWFPKEQWKTIPLNSC

SGGYKIVGGFCEDIDECQEQGHRACLDPSATCKNTVGSYICECPTGYKNVGGYCNDINEC

DQNKCGSNTECTNTVGSFVCNCKTGYEPKSPTECSDIDECARPASPCSETSSCHNTDGSY

ACVCKTGYYKPSPDSDCVDVDECQQQHNCQPIGIATCVNTVGSYRCTCQDGYENQTPHRC

VDTDECAGSNVCDPNKSVCRNFVGGYSCACKDGYRQGSTNKICEGVVCPALIYPSGGKLD

PSRCTQNDANRYQDVCTVTCNDGYALEDPQNKAYTCGTQGRWEGVKAVCKAISCPALTAI

SNGGAWPDTCLSSGRNYGDACSYYCNSGYKLVGDASRSCTKDGTWSGSEPTCSKDVRVPW

ISCPSNIFVDLEQDKSTADVSAMWKEPTSNVQPITIQPSNLGPQFQYPTGQMKVTWSVTN

SAGSASCSIYVTVYDKQPPTVQGCPTGKIYKETSEKETAVTWTEPTFTDNVGVAEQESTH

KSGHVFMTGTYNVYYKAFDAARNLATCEFQVVVKRKGCSVLSPPVKGTIACNNFGGTYFC

TVTCTANHQIFKSPSQYQNFWSCDSTGMWTPDAPVPDCVEAAPNDGATPCPDGQVRMDVQ

VFGQAQKYCGKCPTGMYFKASECHLCEAGKYQDEHGQLSCKNCTQGTSSMPGAKNGNECT

APCAPGKFSVSGLGPNCESCPFSTYQSKAGQSSCEPCPNGTNTEHVGATKPEDCGVDPKI

TAILPSSKTIKENTDVSFECRGTGVPRPKFFWKFLQDIPADFLGKMTQQSIKDGEGNVVG

ATLLIQGATEKNTGSYECAATNTHGKAVDLAQLTVEADLGFSSGGGQI*

>TRINITY_DN878_c0_g2_i3.p1

VLSIGLAFAAASSDDYGSELVRALMRESARSRPVSDTSQRYDTETEFDSVLPKLEERRPF

AGHEKREPMSRTGYDKLDMARLAFLARELHDSEGPCVDRVSYCEEFYNNGECWEKDLVDS

MKDSCKKTCGYCRCQETRYGCCTSNGKVPAEGYYKKGCGKKLCIDLDLKCQEDQCKIKEN

MAERCSYTCKTCDRNKALSPPRGECNAGKINKYPHGCCWDGSAATSDDKQKGCPICADIS

PALCSRRKDQCTDNRFPNIRAFMLQCHQTCGRCTCFNQYSDAVCERLANTRNCHLPEVQE

NCRKACNICDCEDEYGKSFCQAWKKSGRCMESGVRAKCRETCHACQPS*

>TRINITY_DN934_c0_g1_i4.p1

MPSYKVIYFPGRGRAEPIRMCFAAADVKYEDVRIAGEEWAAFKPKTPFGQMLFLEVDGKL

IAQSGTILRYVARELGLAPTDSWQMAQCEMLVDGLDDIGKKMFEFHFCKDEAKKEELKKT

FFSEFLPAQMAIYEKLLTSNKDGSGYFVGSKLTFADIVFFTFANSWLAQAKMEVPEPMKP

FAKLVAHYNLVMNNDKINAWLKARPVTQM*

>TRINITY_DN9573_c0_g1_i13.p1

MIAKTHMTPVRGSKLWIIILRDTVKITSLEGYCQDNKQLMERYCPVTCQLCKKQPAPTKP

ETTETETAEPETAEPETAEPETAKPPEPETAKPETAKPPAPTRTQNGLSGFQQNCLEAHN

QFRAEHNAPPLTWSEDLQRDAQEWANRLANTNGFYHDPSLNDIGQGENLLWEKPPPKLCD

GPKKEDCKTCRELIQGWYDEEKDWDYNRGKGKFPGAVVLHFTQMVWKDTTRMAMATAIAY

NRLVAVARYSPKGNMGLAEDFKKNVDFPRP*

>TRINITY_DN9588_c0_g1_i1.p1

MAIKKVGSYHVLTFLALQYIAFASANIQYTIMTDAGSSGTRLKIYSYVDDDGVLDPSEVA

QVPAEPHKTKPGLSSFADHPEDIEAYLQPLLDAAQKAIPADHHNTTPIFLFATAGMRLLS

EQDQKIVLGEVVKLFSDKEKCPFKFEPTDAKVITGQWEGIYAWITVNFLESILSAEHRLM

TYGILDLGGASHQNAFKNMKKHPDLVDIELNGREYRVFSRSYLGYGQDQARETFQKVLLD

SSDCSDIERCDIKNPCQFEGYEEVIDIDGVEYNFIGETDVEKCRSIIKETFFCRKPSENC

PFHDQPRLRGRFIGISALYYVLNGIGLLDDTNVVTPKSVGSAADSYCHLSYEDVHEDPYA

HNNCFGANYIFELLTDGYRLRALKRVTVEISKNGFDLGWTLGAALYEAELL*

>TRINITY_DN980_c1_g1_i3.p1

PGSPGVPGTHGTEGPKGEPGDPGCNGTKGDTGPAGNPGNPGNPGSPGGQGDQGQKGEPGR

SRVDDKGVKGEPGPPGPGGPPGMRGDTGPQGRNGDPGPPGVKGDDGTKGRKGEKGSGGIK

LQGQKGDPGEKGLRGEKGEPGSFQGTGSNTSNIIIGPPGQKGENGTVGPEGEKGEKGAMG

QKGERGVSGKGGSQGEPGNNGEQGMKGADGPRGPTGPPGGNGDPGDRGETGSTGPPGQAG

NPGDPGPQGPKGEKGQATAGPPGPPGEVGDLGASGFPGVKGDQGPQGKTGPPGPPGDEGP

QGHKGDPGPAGPPGGPGPVGEPGMKGPIGKPGDSGAEGPKGERGSPGVSLEGDKGMDGPQ

GVRGDTGEKGDQGPRGPPGKNDFGPPGDRGDKGDQGPKGDEGVSGVRGPKGEQCGECPAP

APGQKGEPGKVGNAGDPGEVGATGEAGQPGPPGADGPPGRSGVDGRQGERGDEGAPGFPG

RKGEKGEVIRTKGEPGAKGTPGPPGQTGDSGESGKAGPPGQRGPQGPPGREGAKGERGND

GLPGKDGDQGFSGRKGEPGEPGIAVPGDKGEKGGKGQKGERGATGDIGTSGPQGDSWNKN

LGQIIQGEPGKDGERGANGTKGEQGPRGEDGPPGPKGANGTKGEPGIAIKGEKGAPGDQG

NQGNQGIKGDDGLNGGPGARGEDGAKGDQGPKGDTGTTGATGLPGNTGTDGAKGNEGAKG

EKGAPGGRGETGKDGPQGETGESGPPGPPGLEGEKGEKGAPVIGAKGDKGLDGPPGKPGE

KGEPGDDGADGARGEIGPGGPRGDQGEKGDIGFKGQTGLRGPQGPPGESGNIGEKGLPGF

PGDPGPKGDTGAAGGEGTPGDKGMAGPPGPPGATGRTGFSGDKGAKGQKGIEGPPGPKQN

GTVRGPKGSKGEQGLRGPPGENGLDGTAGDKGDTGPQGPQGPQGPEGGPGADGPPGPPGQ

RGLKGEKGEMGVEGTAGAKGEPGDAGARGADGLQGQEGDPGDPGLPGKKGSSVQGPPGPT

GPPGDKGQRGGAGTEGPKGQKGADGPEGPPGPRGPDGLQGLAGEKGDRGSPGQVSLVPGP

KGVAGRPGDIGKDGIPGEKGQAGPPGDSGRPGADGIQGPKGDQGAEGPRGSTGQKGNTGP

VGGRGEKGNIGPPGEAGARGAPGPPGADGSDGLVGEKGDAGSTGATGPQGEKGNTGGQGI

SGPPGATGSQGSRGDRGDPGSPGAIGPPGEAGPPGAKGAEGRRGDAGLPGDRGPRGEQGV

RGSDGSTGEQGPQGTSGFPGEAGDKGDKGDEGPEGAKGDAGIPSVTPGPRGEKGDQGFAG

IEGQRGDPGVQGEPGNDGPRGDRGEPGDTGVPGPKGDDGPVGLIGDKGDKGTGGLEGLAG

PPGQAGPPGSPDFGFYVTRHSQTVDLPNCPENTTSMWDGYSLLYVQGNERAHGQDLGSPG

SCLRRFSTMPFMFCNINNVCNLASRNDYSFWLSTPEVIPMMPVDEESVRPYISRCKVCEA

PSMVMAVHSQTRDIPRCPPSWASLWQGYSFLASTSAGNDGAGQLLSSPGSCLEDFRAHPF

IECHGKGTCHYYGSTYSFWLSTVDEDDQFRNPDKQTIKNGNLRNRISRCNVCMKLYDNGN

GNGPDIGPDPISSIGSRRRLHN*

>TRINITY_DN99_c0_g1_i2.p1

HSADNETRSGESVTLECVAIGVPTPTVVWTRDGREYGETKAEGRSVLTITGVGKDNVGTF

TCKAENGIQNSEGGLIVVSEDTIINVIGPPKITFITASQQVLLGGNVTLECVATGSPTPT

VTWKRNGQRFPQTPAQGKSVLTINSITADDEGAFTCEAQNGMQDVSGQLIVDRADTKVEI

VAPPKITSITNKQEVFVGADVTLECVATGTPLPTVTWKKDGVDYVPQTQEPGKSVITING

VAAEDKGAFTCEAQNGVKNPTGEIILDRAETNVDIVGPPKITSITKPQQVFVGGAATLEC

VATGTPPPTVTWKRNGQDYVPQTQEPGKSVITISAVTASDDGAFSCEAQNGVKDSLGEII

VDRADTRVNIVAPPRITSRMLDINAVVGDRVILECIATGIPPPTVTWKRNGQPYSPPTMD

QTEGRNVITLENIRVQDAATFTCEAANGLQNPQGDLIVDRADTKLNVAGPPKITSITKAQ

QVLVGADVTLECVATGTPLPNVTWKIERQDYSVLQSEPGRSVVRINGMVAESVDTFTCEA

QNGMKTAEGQLIVDRANTRIDVVAPPKITRPLADVNTRVGGDIRLVCVATGIPSPTVVWK

KDGRQYSPQTQQAGRSEVLISPASERDTGSYTCEAQNGVTDSQGRLIVDSVDIKVKVADL

CKITTCTRPHSTCEVRDNAAECVCRFSCSSERSLVCGTDGKSYENECLMRQAACQTDTSI

TVRHPGDCDPCQGKVCDRPFAICVNRGGVAECTCELGCSNERDLVCATNDFTFDNECILK

RRACALNADFTMRRKGHCEPCQGVNCQGGICRAYDDQAQCCPISCPTVMDPVCSSHNRSF

DSECLMQRDACDKKKAVQIKSRGFCPLTQCKIKADIGFLVDSSGSISRSNWRRMKLFLKN

ITTSFQVGDDAARFAAISYSTNPQVEFNFNSLTGSQVTNENYHKLIDEMSHQKGFTYIDK

ALEMANDRIFKVEGGMRPEVDKVALVFTDGEQTTTGGYTPLDVASEPLKRRGIKIFSFGI

GKRVSVSQMRAMATDPVHNVITATSFKALQNRINTIMEDLCSFA*

1x Clean Only

>TRINITY_DN10133_c2_g1_i1.p1

MAIRLRLAIILVSLSVVCQQSTGRDEPEKVGVECSPTEMKVSIEKNLIPDFELGDLTLRE

TDCLLMDSSQNATHFSLSLPLTACGTKVEHTTKNIIYSNVVKDRPVGADSVIVRLQALEI

PFQCVYSNKGSSSTVEMNIRQPSVIQLKPDDGSGQFFLKMTIFKDKDYSAAYSPKDFPLA

VSLGHRLFFQVSADAPDRRLSVIADTCYATPTPSSSHQSRYDIFLDGCIKDSTVEIHPHP

LRTYRFSFETFQFVNGQAEPYVFVHCSVVMCDSTDPASRCSQGNKVCNGNGDGDEPRRRL

RREAEETFELEQGPIIFVKDGSASGTGQNSQAQGDWAVSGWLLVAMSVVCFVCLVTVVYT

RWQLHRALRTTDV*

>TRINITY_DN102095_c0_g1_i1.p1

MPGRKAGSGSKAAAAEKSENQANHNVEKEQSDSKAPIEAKVDKAADGMVENNEGKNPPAS

KPGRGRPKKAEGEQPVAKKPKMAKVPSRVSQRVSNQKKGVKLPDPKEDLLKKAPRKRNSK

KPEKPVKNTTETEDKREETSNGAAEQAVES*

>TRINITY_DN10301_c0_g1_i3.p1

VVGVCQLRMAEEGKAAEVPPESQEDEKKEEPHPPAQPELETMRSIVLTGHGGYSKVQVQK

YAKPKPMQGQVIVRVHACGLNFADLMQRQGLYSAAPKPPYVGGLECSGVVEELGEGVTDL

EVGARVVCFSNFGNWTEYASVDAGLCFVMPDDMSFEDGAAIPVNYLTAYLMLFHLGNLGK

RKSILIHMAAGGVGVAATQLCKTVEGVTIFGTSSASKHEVIMDVGVQHPIDYRTADYVEA

VRKVNPEGVDIVLDPLGSPDTKKGYDLLRPMGAMICFGAANTMTESKGMFSSAKNWLKGI

TLSPSKMMGDNKTVSGFHLGKIRDKQLLQDAMQALFKLYTEGAIKPRIDEVFAFEDIAKA

MKRMHQRKNIGKIILSPMKEPEPEPTPEPAPKETKTTDAQEEDKPAEEGEGKAEESKPEG

KDKADEEGKPEGGGEKEKEDSKPEGAEEKPEGEANVDEAPAETDAAATKADETKASDEAS

DTPPAEAGQADEAAASS*

>TRINITY_DN10484_c0_g1_i1.p1

SLLHAQCIVPHFFTRSRSSRTGPVLSSAKISEKRTAMNYKLVICLAVCFVMIQGGYSKAR

KRTTSCEIPQEVRGNWRAPDFETKKGKLRLTIEIGASSAKLQRKLGDDESSVEFECTAGK

DGFFLTKSQVPEGFNDLTGEIKSLYKLYQFTCFNFDKINDFLKVNMYSFKENPESKDASQ

ACSEMGTKETLNTIGFSPADQFNDNPKEE*

>TRINITY_DN10600_c0_g1_i2.p1

TDLVNFRADDLFPNEQVDWGFDGLLLETEVINGVEYYYYPNRTVDPPAKVYCPYNSRQSL

EVAISRRRSSLQRAIDVYMEEGPVSVSDIDIPTCDRSGDSELQIDIFSDRLVPTWGEITK

HKTPFKVLFDMPEDLDGFAHGKTHLSWNMTRTVQYKGDTWFTSDAGGKFHLYSGYNKGLS

VNPSSRKMSVMGLILTYNEKDGSLTLNPRDYRASKKVYPTLPKDLKGRTLAYVVGISNNA

TSKRSNEVSHDICNVKWSNSLRFDPRDQGGKCLHFTASTDGEIFVVFSVIPNKRSSWYYV

QIGKREVSIYKGTTKTVLTRDTSALALGNSTLHQSYFVCVTEAEESTLIEYGKTMGSAET

GEVLLTFLDTTDNLHVQFYAFANNNEPVRIMGAAVIPRNLTRTVCKGDTTQDAVSAICVQ

KSQKCHELCDPLVGCVQSGDTPLPTECRRCRYASVVSDDVRTCRSSCPETYVPAGVNKTC

KQSFDLRVMAGETSPHVYLEFPRPATWAETSLCLWLKIPTTDNPSGSIYPVRLSDFYFQF

TYQRETTSSGQVPAEHEVKGKVKHYPLGSRRPVIEYNFDALLTNDGDWHQYCMTWSGLNG

AVHAYVDGSSTTLDSTAPLKVHLTSLYMFIPTTTTPYTYYISEVNVWSRVLPLQEIQQNS

LECFSASGDLVAWQSVKQEIESTALFVEISTCPAQREDDEDDEDEITQKRKDRALLKYTR

ELNKKSVKKTRKIRAKA*

>TRINITY_DN108201_c0_g1_i1.p1

DKQVDSIASQSGTPRMDLALQLANQKLFTSANGARDEAAKYVIVLTADTKNVDPSQIPLR

NASEGLKNSGVEVFSIGIPPNVNIRDLRDVASRDSNVYLLTRDQLPGVAGWLAGAVTGY

>TRINITY_DN10840_c0_g1_i1.p1

VTDLRLGSFVFLFLVVPLGIVADGNDRHVKFEYKYSFKGPHLVNKDGSVPFWKHDGSAIA

SDDQVRITPSLKDKKGFMWTKNKFTSEWWEVEAAFRVTGRGRIGADGLAFWYRDSPGEEG

PVFGSSDKWNGLGIFLDSFDNDGQQNNPYVSVVVNDGTKSYDHFSDGKGQDIGGCLRDFR

NRPHPVRAKVRYYQNVLTLWLHMGMSPKLEEFELCTRIENVVLPKEGHFGISAATGGLAD

DHDVLSFITHSITPPKDDTKAEGGITEDEQRKLNEQYEEYQKKLEKQKEEYAKEHPDKRK

QPETQYETSYERDIRLVYEGQNAIHHMVNQLHSKAGELTVQVNSLQTLVMTDHNKMNNLV

TMDSTINRQEVNTLINLQQQLSDKLRDIGHVLDRVASGGAAMERRDAGLPDYGSKLNEVQ

SAVETLTHSVNHLSSKQQFAGQGEKKDCPPPPPMPQCIGPGYFVVLVVIQIILFVAYVAY

QQQKEAAAKKFY*

>TRINITY_DN11187_c0_g2_i3.p1

MLSSSLYVIHYNWLRLRLTSYSLSRPWGEVTKIEQRVGLTCTMKVNLVLLGCLLFIFAGS

TFGKEIQRGQEEQAIEAFRNEYQDTFDESDTDKRSSVAPNVPKDVPPEVTKFLDENVKKV

KKQTEGTTWKQFASVWAIPDEPNPYKYSPSADGQGVDPVINKQNTYSPDTTPGQTYIVAR

PENTHIHSERIIYEQIQKGALTSLKYPPAMGVMYSYNTPCEDCQKNYLLPVLRALDQQAE

WHPMPFYLAWTQKYPRDKPQSYFDDLAKKWKKKGIIFFQYVV*

>TRINITY_DN11290_c0_g1_i1.p1

MKLVILALLAFVSLALSQKPTPCESPKEWEAKATQTYYTEEFVAKNIGVWAYDADNQRQS

FVGETLRAGTFNSIMLYKEQKVYTVFTDLKNVSKCTVTKLEDAFHPIGFPKESEYQFASY

VGSTAVPGGSVLTYTAGGSFPSSKAVGVYEITVTAKGCVPVEIEAHGKTSKSPSSHIRFY

DVVPKPVDPKKFAIPSICQHE*

>TRINITY_DN12086_c0_g1_i2.p1

MSFRRRNRLSGYPSYHALAQTYGFPLINKHFVANTFSQSSRLFQKDLRCHYGCVNAIDFS

NKGGEFVVSGGDDRRVLVWNLDKCLYHDGTPAVMTGEHMSNIFCATFDSTNKTIFSGGND

DQVIQHDVTTGNTVDVYPHINPVYGLSIHPECDNLFLTAGDSGKVLLWDTRARRSETPLG

VAQHRAPFHGAVFNPVEACLVATANSRNGVELWDIRATDKCLQQYTSTINHVCTAMSVKW

NAVGTNLTSLRRHLPPVLYRIDQPSPIAEFCHPGYKNVYTMKNSCFGGGKDQYIISGSDD

FNVYVWEIPEPPAPDAELVTVNRAFLVLSGHRSIVNQVRFNPDTHLIVSTGVEKILKVWS

PFPVGVGGTDVAATPRELYSHDDYLNLVMLSGRPLTHEYDAGTTDEDPRMLAFF*

>TRINITY_DN1399_c0_g1_i1.p1

MKTFIVLLLVLYALVTVDCTEECKGKKKVARNCKEVIVAGKITSGVYSVDPDGQGAFPVY

CDQTTDGGGYAVIQRRKDGSVDFYRDWDDYVEGFGDLGGEFWLGLEKIHRLTSLGGNELR

VGLIDWDGNSAQAVYKGFRVAGAGDLYRMNLNSFAGGTAGDSLTYHKGMQFSTRDRDHDK

WGLNCAVTYKGAWWYNACHQSNLNGQYKEGGNHVSFADGINWVTWKGYHYSAKSSAMRIR

PT*

>TRINITY_DN1434_c0_g1_i2.p1

FILKHGQIQLMIVMDKSMLLAVAVIFGLAAANDAGTRGVFYMTGSEGIYVIDPSAGDVDK

FIGPKQVCTENPRTRKKCSFGGAVSIANELVAVSDSPGNRVLLIDVEKQEMRETIPTEPY

PYDLYYLPWREELWVHTWTNATFDVINTKGRLENTHRAIKAHVQPGWTHGYMSANQNMKD

GNTAYVTHLWNPGLHQINLGTKSYSDFVNVSSWNCTGTLHFAYSALNQHGFFECMGAAVL

LELDTTNDTVVRKWDIPGYPFASPNGRYVVSLYAPRNETANKLLASEVHVIEISKESAPV

QRGRIDIPGGVSALAFVEKEEKPGSYLVLITLLYSDKIAVVDLDLAASDQGRVTYISGVG

RVKSGPGMHALGRPIALGGDWIITPATLNNSAAVINAKTRKLHATVKGIVGGHRIAWVVP

KESSKSAGARLPQPLKLALLLLAFSLLYV*

>TRINITY_DN1461_c2_g1_i1.p1

MTDTVEDRLKKLFVGGLDRGTSDETLKEYFSTWGETTDCVVIRDSQTKNSRGFGYVTYVD

QDSAAEVLRVKREKGAHVIDQKAVEVKRAIPRDDQSSAAHVKTRKVFVGGIPPEAEDEDI

KKSLLEQGYLSSDEVNVDLIKDKMTGKHRGFCFVELANEDDVDTLCCVKRIDLKGKKVEV

KKAEPKGGRGEDGGRGGGRGGRGGFRGGRGGGFSNSYQQPSYGGYDSGYGGGRYQNYSSG

YQDPSYSYASYSGAAAYGASYDPYGTMGMYPHGTSGYGPSRGGAGAKNRYQPY*

>TRINITY_DN1469_c0_g1_i1.p1

VERRSDMRLGGRMLCGKTGLPVPILGMTIHPETGNAYPIGGCHNDPVTGLPVAIEIGSMM

FDPNTGRPAPIVSVTIDPRNGNVIPLGGTPGESDLGDEVPLLVGDSFSEPLSGIPLKVTG

ARLVDDGEERELEPMGGGYQHVLDVAELYHEFRVVEAVRALKESVTGPEASGARHEESLL

ESAQKDLHRARAKVVTQLLRHLHDLMRREERASLLAENGGSPGMYEFSATGQLLPILVGT

SMRDPYGTELEVPVLSIDKNRETDTVIPLGGSMEDPGGDGLVPIMIGEKAVDPVTEQLST

IVGVKLNQEFAVVEPVTLSSSTQRKRRPPPGSVALLEEELVGRRSFWRRQRHRELELTEL

ESKLHHQLVEGEHLMASDVQSQLESIREETVAISDAAHREVQRRSEASVDHAAVLPTDVV

AVLTLFDTAEREKDASHNTAHKRFADTITRFFDKLKVEETKYNNRMEELQGALNPEAEAA

VTERFLVIKERLRDELHDQLQNRSEQLDEEHSGLEYTRNKAEISALEAKIVLTGGAVLAG

DYEVSLPGVYGDDLPLPETNRELVPLLQRLIRLLQEGMPVMMNSAGQVVAGGYSIFGGGE

GQVSQLAATQPGVVITRGSPAQTAGVAYAGQSAAGSVVQEQAQGKAASLSRRETTVFSTA

EILSSVEVGQMGQKYSSETVNIAEIAAAGTLTEEKRKEITKNLLEKHTLECAQLENELRS

NEIKMITDVISEYEQKKEKALAGLQNELREKLRRAKSEEEREELLVEYARKMADVQEEIE

NEKQVKLRDVRRHLRQERMRRKRELYSKHKAEARAAGISDVIDLDLPDESELERDLLLLA

KQQEKLLAELTLAYAEENEREREERESGRRAAFDAEMEARVRAMNLSLAPEEIEGALEEV

RVLQSSASSRRVNMKERMKERKERKKSKRALEELEAQLKNVEPGSAEEADIREALKQRDD

ADSLRGMDAVLSVLTEVDSEQEDQQRRQVVMKLMGSSQLSEEEQEAAVAKYMEEAEEAKK

KFKDLQSHSQAVLAAKLAARRRMKVERTKEDAMKKELLALSKKQAQLTGDQGAVEVLETA

EQSVEKDVASEMGSLVEEQIGRQAELEINQQKEVADMTEEMDAVLAVNEKEISSQIEEQK

KKLLEEKKQKFQKEMARSQANLSEEQAQHLLAQHQQELEILERSLDNEKNRQVSSLNEKI

KERKRRKAAAMAQKHEAEMGKELLKQQSERQRVQDQKLREAQTAALIDKVQGMSNEQAGN

TIYRVLQQRHMQERVQMEEQFNNEIAAAKAEARALMSETCQAEREELIAKQEKEMMDLIA

KSGSLTSGELAQQKAELKLNHKKQLAQFDSMAEKRVAEAEMDAVPSLEIKHAHARLEMRE

RQLRELAGTMKDLTTEEELIQSYAEDAEKAAEAAKEYREQSMFDMAEKINKIKSERQQQN

EEQRRKMDEEIRRLEKELEEERNREELRLAEREAERTAKRLQIAEEQEAARRLEMAQRGM

TEDQKEKLLKEHEENMAKFQENLKNEQARTKDALREKLEARRRKKKELELKKITEAGKED

SAAIEQKEREQLSSLAKEGAQRLETKTPLRPKTPAPARLKARDKSKGITDEDFFEESEPA

VTSPAAPVLTAGLPEGVSEQDWVSMLIGSPIFDSVNEIESMLRDNIGEGGVAGAKGGRPY

LDIKDAQWLCQGDLVPVDINELSPANFVVYRFGVFVTQMLRNVIQAPEVTLLLASNLPPN

NYDSNAFRNSFFYEHARKILFIRQERMQSVGDFIVVIAHCLAHIKVDDLINDSNPLFLRE

FYKAIRVCCQDMFFARSRATSTAQSLVGGAAGPSPLEAAFKRTTTMDERVNVVGELVNIK

VSRTVDNHFSVTRIAERLAKKNAFLTRAKLREYLATGHAPSQRKEEYAMTRLQELRGEKP

RENSRPKSHKMGGKTGLLSPKELLERQIGELNGRIDTLNSELAQVIRTESDLSTAISNMQ

SNEDVSDERLEAIKQQLTSTEMQKDNLLKKLDHLDEEVRKKKKELGQKK*

>TRINITY_DN1491_c0_g1_i1.p1

HSMRRQVILFLCPDDDECATANGNCSHKCSNTAGSYRCECPDSELTLEADGKTCTAPGMT

VTCEPDSMYVTFTRQMLSGLDEQHLRLNDPRCTADGNSSHIWFLVPLQGCGTTHTDTTDT

ITYENKVTSRALHVAGVITRVRQVEILFRCSYGRHRNLEIAGFSPGTRKLRVSEAGFGTF

TFLFNMFHSPSFLRPYGNSDYPVDVNLRQRLYFQLQVKCNDSDLVLFVDTCKATPSGNSR

AKPEYVFIRSGCNNDSTLVYNYSLQSVQRFNLEAFQFIASHPVIYIHCDVSVCHKSANFS

RCEKGCVADSSTVRKRRDAASHVSSPSAHYVISEGPFRLDASGSRDKVVVVPVAPEQPLG

SDDGKSPALPVIIGLISVAVLACLSVIIALRRRKSEKKSYEPVSLAEERPYCNM*

>TRINITY_DN1513_c0_g1_i5.p1

MFQFGRTLILNNVKKSTHEGLYTCEAKQTGGDPIKTQTVVTVQVPPYWSPEPPPKKMVID

ILGNGTLTCPGKGDPNPTFTWYKDGDRLVENEHVKIDGNKLQFTNVRLDEDAVYQCAVEN

VVSMKVGATWVFVKAKAPKFDQLGPFYLFRGSDSKLKCEPDAAPLPSAVWKRNDQQITSG

GRYVLSDEGRTLTIRGVVDGDEGKYTCTATNQVGSATATGEAVVLDRTEITVAPRDVYIV

EGKPFDLRCEAKKDASLELMYKWYKDGAELRFNSRVVWRRGANTLTVFVARTDDTGEYTC

LAYTPEPKKSEARKSAIVSIRGAPDPPTGLAITNCYELSTELTWTPGDANNGSIIYYIVE

QEDASNRNVFIFHSNVTQPNATRTTLSLTPWANLRFRMRAVNRLGTSRPSEPTSQSCVTK

EQAPSKYPDNFRGVPKKAEELDIAWDPLTKLEQNAPGCKYVLNYRKGGTTSWKTITITDP

SVGQYPVPNAGYYELWEFKIQAENRVGRGPESPIEKSRSGQDAPKTAPTDVQFGKVNARS

IELSWIRVTVDRGSVDGYTIYYWSDSQVPSRKRRAIAANALPYKVKSTGQGPRQQATLVG

LKPYTDYKLAIVAFNSGGESPQSNEVAFKTLEDVPGPPENVNVYPFGKYILITWSPPEEK

NGIITGYEVGAVKYQNIQDVKTIPRDPKASNANRNLFRNLEFKTKYAVEVVAKTKIGAGP

GVRKFTNTIEESVPAKPRAPTVEADSIDSVVVTFLFGLEKGGYPLEFNVHYREKLDSETW

KKTGWVDHLDTQSVKIDGLNNVLYEFKTVARNDVGESEESDTTDSRPLPGIVAGARADEP

IHKAPWFIVLLVVIALLLLVLLILVLLSRRGRSRYPVGKRERGRATILDDEPEEEDGIVF

PRTEDIPPNYQSQGSLHKSNLSDSDRDSLDDYGEGPEFQEDGSFTREYGDDKDGIKSPDQ

KDQSAFATFV*

>TRINITY_DN15370_c0_g1_i3.p1

AAILDAGVNTHERVIMVDYSKWDHIEVSDDEDETHPNIDTPSLFRWRHQARMEKMEERQK

EREEMDKKLWVSKAKLEQVRRKMESVDISSAEREEMKEKLQKLELQHKDLRKQDDELTNK

ERKEPKNVDTLSKDGFTKTIINKPKPKVKLSEEEEAQQNSDFMDAHEKEIKHFGMLQDFN

DSEEYLAKHPHLTCDATANYLALWCINLEVQEKHSLMERVAHQCIIMQYILQLSQSLEAD

PRSTVHAFFVKMKRARTDYKEYMDAFEDELTQFKIRVKGRAEARIEKAIKEAEEEERQNR

LGPGGLDPVEVMESLPKELQDCFETKDIQMLQNTLGAMPEDVARYHLKRCVDSGLWIPDA

KEAEENARQAAAGSEVEDEPLASEYATVGDTDAAEK*

>TRINITY_DN15419_c0_g1_i13.p1

IQDASADDMGRYKCEASNGLRGPGGELLMDTVNIGITITEVPKIVSRPSGNVSLKAGDSY

VLNCTATGLPAPMVEWTKDGDEIPQTISEGKSVVTIQDASAGDIGTYKCTAKNGVTGPDG

KVIVDSAAVEISVTEEPKIVSPASGNVSLSVGESYVLNCSASGIPVAQVVWTKDGDEVPQ

TSSEGNSVLTIQDASADDMGRYKCEASNGLRGPGGELLMDTVNIGITITDPPIISDIFNV

QVLQGKDAEIICVATGLPKPTVEWRREGTFVPQEQEPGESTLLINGAAEEDAG

>TRINITY_DN15430_c0_g1_i1.p1

MGRKFFVGGNWKMNGNKGKIDEIVGNLCAKGPYAQTEVVVAPPSLYLEYVHSKLGNCDIG

VSAQNCYKVASGAFTGEISPEMIRDISCEWVILGHSERRKIFGENDELIGEKVAHAMSAG

LKVIACIGELLSEREAGKTTEVVFRQLKAIADKVSDWSKVVVAYEPVWAIGTGRTATPDQ

AQEVHEQLRSWLKDNVSADTAQATRIIYGGSVNGKNCRELALKPDVDGFLVGGASLKPEF

VDIINAKL*

>TRINITY_DN1563_c0_g1_i2.p1

RELFQWRPTAANFANYCNSESFVLQDEKRNEKGISWLEKAVQLGSMESAFELWKLQSAKR

PTERSYELQSLRELRDCSSSGNVDAQLALALKYTSGFSGDITKEQVADYISRFISRSKPS

NSHKIFDTFQTKLESAIRSLLVDCLVEVVIEKDFSSQILHLAVQMIDQYLMRAGQQVQES

ELKLLGITAILIASGFQGWDTITIEDAVWATGNACEYQEAVRMMGEVMSCIKGQVRVLTI

PDYLNLLCRLAEVDYKTECFAAYIGDLCLLHNEFGQYSPAVIAASIVCLANAIVSEESPW

AVHMVEMTGLRVSNLSECILHLHQKCLLEDSQIDYEDENFELATRTRYTDERFMKVSELK

VPNREDLRHFLLPFVFESQMELSNQATPARCQQNSQDETALDASISSLSESGYDSDQKDE

GQKPMCEDVLDDEFFVIDKQFDNASFLFFAYG*

>TRINITY_DN1685_c0_g1_i1.p1

MNKSRKKKKSGLKAPGKAVIMSGSSKKPPTGSSSSVKDYVMGYTDIFEPSDETPVVYAEE

GDAISNCSDNEISAHSMEGAHYETQSLSGSDEGDSRPGPPPLSSEESNDEEGEGGDAREG

PPPLDSDEADNSQDEEGEHHSSPENHSGFDREEKTERRARSDQSDHQSDDSGSVREEPPP

LDSEDEDGNAVDMSAGEDGAAEADQGLDEGGISDEEQEPTLDNNTLSMSSDDEVDGDAEK

SGGGLKIEEREGENDEEKASEEEEEEERDDENEKETNEETKETGDDGEEEGKEAKTGNDS

RIEKEQDNEEEELEEGEEEEVASEESGPHDRLIQEEGDHQSEIQEVNLEDTERTEDEKEG

KSENEEEEEEEGGMCETEIIEDALEWDESFVPEKIIPEETIEPLEVPPIRAETFAAKPKI

SKPKAQPEQVPKRFEIVKADVHPGRAVKKSEKRQPETIAEERDKRIATKTPSKSRTSRSP

KGASVESVEPKTFLARTERAPVEAVHKEKPQGKGPPKER

>TRINITY_DN1689_c0_g2_i1.p1

MWKTILFLFFSGVAIAKHASKKHTSNPHAAHKFQMTAELKDFLEDRDISIEPENCHDEDD

EDCDDRAEDGKCLKDIKDMIEECPWSCRFCARKGRYTDECEDNTHKCEDWADNGDCLRLP

QYMRQNCKKSCELCVSDDRIDKDVRCPEWAEVGYCKTTPEIEGTCPHSCHRFRENVAAPY

PYPYPITTLYPYQYRPTPPPPPATTAKPTEQKPEPTPRPSPKPTDKPKPEPSKSPVTEPN

PPTEPQTQPTQPQPEEQPQPQPQPEQQPQPKPEQPQPEQQPQPQPEQQPQPQPGTQPQPQ

PQPGTQPQPVSPQIPPVTQPQPQPQTQSQPQVSPQVPPLSPQVPPSNVPVPQSTHDKHTK

DHEHKRHRQKDKEHKKKKGKHH*

>TRINITY_DN1712_c0_g1_i1.p1

MGDDEEAEVATSGGMDEHSGRPVRQHRPPARFGTIANMQNSDSDSEEEGQAFYAGGSERS

GQQVLGPPRKKKNADDITQDVFEGARRHGAEVVDETSEHSAVSRPQAFKGAGYRLGDTPG

GVSPAQPAHKEAEGPPKPREVALKFWSNGFTVDEGPLRSFDDPSNADFLKAVQKGEIPQE

LLRLSRGGEVHVNLEDHRGEDYEPPKQPRIVAFAGEGHKLGSPAPEVKLDNTPSSTSSAS

TASASSAPLPTVDSTKPTTSIQIRLADGTRMVAKFNHTQTVGDIRRFIHASRPQMAPNFV

LMTTFPNKELRDEGQTLADGNLLNAVVVQRLK*

>TRINITY_DN17295_c1_g1_i1.p1

MRSVKILVLLCVFAAVCSSRSLADKARPKVHTDNLVDKEHFPEGEHDEEYDHEAFLGEQK

EEFDELSPEEAKKRLKVLAEKVDTNKDGFVSEDELADWVKSVFKDRLFEGIEEDLKEKDT

DHDGKVSWDEYFKSLYGEETIEDEGDETKEMVRKDKRRFDAADKDKDGKLSKDEFGNFMH

PESSDELGDLHVIETIEDIDKDNDGMINMEEFLGDLHVIETIEDIDKDNDGMINMEEFLG

DYKDPEDTTSEEPEWVADERNRFKEEYDKNNDGKLGKEEVKLWILPETDTAMAQEEAHHL

VSSADDNKDGKLSQKEILKHHSVFVGSDATDYGRALPKHDEF*

>TRINITY_DN17515_c0_g2_i2.p1

ELGPCSAMAKHSLALVLTFFLAYQEASFATRASSYRHEQFDAESDRFDMNPGRDYAAEME

EVFKMADAAYEELSDTQHSTKRDEVPSMCKVGLPQVSSPECKARRDQGLQAQRQLYRLGL

RPPLPMPLLDNTPRGLYAQLSQDNFAKLHTNLYLGTLRASKNLLQYRRKVHPEEITQYRG

YAEIFDFFKTNLQDPRKTQVLSNFISFASEHEPFKKITQEWTQDDFFTDLRFAGPNPLAI

RKVTGPGAANGISWDDLKGNLKSDFDWERAVQNAMKKRLPLDSAIRKGRVYALRYENFDN

LSAGEDIMDFRKTRHMVRPLSPIALFAVRMPRTSNDNAKVYPVAIQMDHTPDSPVYTPRD

GGLWTWAKLNLHVTDFLHSQLEHHLVKTHLLMEPFCVCLARQVSERHPLQQILKYHCRGV

MLANTFGSPSLTDKGRFTDQLFPLGHLGTQEVVTRSYQQCSWDDSDFKEQMKNRGMDDKS

RIPYYPYRDDGELVHTAINRMVQDYVNLYYEEDSDVMADYELQAYLNELSADGSGTNGGQ

AKIRKLPSQVRSKGELVEFLTRLLWLAVGKHAALDYPVADYGAFTPLMPTKMYRDDRVGP

QEFAIFNLPSGNVSAVQASVAMNIGALRYDKLFDYGDQLEDSLAGAIVKGHNEYLQGVVD

VLIRERNRRRLRDGHQTYPYFLSRWMPNGIQA*

>TRINITY_DN1770_c0_g1_i11.p1

MAIVVAVLAFLAVCQGFTLNQQDDSLEWNAWKTFHGKSYATESEDAARRAIWHDNLQKIQ

QHNSEGHSYILAMNHFGDLTFDEYRFYYLGMRAHLNNETARNGATFLPPSNVQLPDEVDW

RTKGYVTPVKNQGQCGSCWAFSATGSLEGQHFKKTGKLVSLSEQNLVDCSKKFGNHGCEG

GLMDYAFEYIKANGGIDTEASYPYTGRDGKCKFDPQNVGATDTGYVDIKRGSEADLQSAV

ATIGPISVAIDAGHSSFQFYHTGVYNERACSSTKLDHGVLAVGYGTYNGQDYWLVKNSWG

PRWGEQGYIMMSRNKNNQCGIATSASYPLV*

>TRINITY_DN1796_c0_g1_i12.p1

MHVAMCDVFRFLCRQPGTRRSCNMAAPQTPLVLLVAVFSVLIHARISAAVDQAEENKALD

FLRKYNNETRARKWERTQVSWVHATNLTEHNARLKTSASLAFSRYLTKKREEAAKFDTSK

LSEDTARQIRFIKATATAKDPAVQKQLTDLEGELDNLYSSAKVKDKDGKLLALNPDLYGI

LRESRDYDRLKFVWQGWRDASGRKMRSRYEQFVKLSNQGAKDNNWKDTGAWWRSWYEVDN

LPEIVEGLYQSLKPLYQELHAYVRFKLRDTYPQISEDGPIPAHLFGNMWAQTWANIYDLV

EPYKNKSSLDVTKTMVKKNMTVYDMFALAESFFTSIGLEPLPKQFYNKSMLEKPADGRDV

ICHASAWDFSVVKDGERDVRVKQCTGINHDFLVTTHHELGHIQYYLQYWDLPVEYRTGAN

PGFHEAMGDTLSLSVDTPQHLKKIGLLESYESDDEADVNALMKMALRKVAFLPFGFLIDQ

WRWRVFSGDITSENYNAKWWELRTKYQGIVPPVERSEKDFDPGAKYHIPGNTPYIRYFCS

YVLQFQFHKAACEAANFKGPLHQCSIYQSKEAGKKIGDMLKLGKSKPWPEALEKLTGSTK

MDVGPLKEYFDPLYTWMKEQRKEKGYPLGWSVKSSVGAIVPTMFSVLAAALLGFVRFQ*

>TRINITY_DN21001_c0_g1_i4.p1

KQSVQWSKSNRELTVLSDGTLKLTNIQMEDVGKYVCTVSVGKLKFVAEMELNVYVDKCAS

GVHSCHRDAICTNNDGSYSCICKPSFIGDGRTCSPAHPGVSFSTMGNRGRYGPIQQYTVP

VTGRYQVRAGGARGGTHVYSYGYNPGTYYGGRGAVMSGIFQLATGTVLKIVVGQRGGNSV

EVQGGQSTTRTAASLGLSIENNAGTGGGGGSFVYKADNTLLIAAGGGGGASGGYNGVDGQ

SGTSGASSVGLDSRRSRAGGSSGQPGVCNTAGGNYHGGVGAGWLGQGCARLGVQHGERGG

SRDQGWVGGQAGSMNSGNNGGPPPGAVGGFGGGGGGSEDNR

>TRINITY_DN2178_c0_g1_i9.p2

MVKEIASKEEFDTLLKESGDKLVVVDFYADWCGPCKVIAPKIKEMEDKEYPNVIFAKVNV

DENSETAEACKISAMPTFKLYKNGKEIAEVVGADEARLKEVIAKHA*

>TRINITY_DN21906_c0_g2_i4.p1

ARPPDRRCETHAPGYLVGGHPAYEEGTVARKVCFGFGSNACAKEATINVRNCGDFYVYEL

ETLGFCKLRYCTNPSGVNPTFPPTTAPPPTTAPVLPLPSLSLEVKTRAVPGGNGGKRVEV

YAKCLLSEKVSKKFVIEAFWVIDGTQVPFKVSRKKKAYELKELEKGFKAGTT

>TRINITY_DN22686_c0_g1_i1.p1

VDMESVVDAEKELTQGREHASGSQEVKQEVEDLRERLHWITAAANERQKQLESTWSNVKH

FHEMATLLVTQMQHNAPRLQALAEPGVEPREAARQIKMLDLPGLQREVEAANETGEDIIR

HLQETGQDSGPIQSKLDDVNQEWADFQAAIAKLKVTPVVEDELSSEGERRTFEWGKPLLG

DSTGDEEEEEELDVLESAAPVYLEVEPVEIIQGELEEKKPVIDDFVAVTETLVENAPPED

LSALNGEVTPVIEALSDIEAKTAKRQEVLDQAAPLAQDYQDALQNLAGLVEQMEEKLATR

RAFGPEPEKVSEEIVDIKELEKAINEAADKAKTSGEALLELQDPSTDMSDVKSQLRALTR

RVDDLKIK

>TRINITY_DN2309_c1_g1_i1.p1

WHGVGNMAAQGNGRVSIRSSRGPSLLVVGLVIASLVLFYGYWSVSSRNSQLLKDVNILQD

RLRVLAAQKVAADKKNSALTSQMEQQSRTLKGNLEGERRAREDEKAQLTSRVQELMQGGK

DKDDKLARLEYQQDKHKTEIAQLNKFVTNSTQSLKLLADKAAKVIHDHKALNEKYQKTLS

NVKTLEREKDECHDALAKVQKAQEASSSKKSDDAKNSEKKENKKNEEDEGSERKDEDKNQ

ESKKDEQEQEQDQKEEESKGETPSQEELTNSPLSVTKRSAIPEDASEGKGASSDALSPRL

DEAGVKRDAKIGDQSDASLPSEKEDDRKQETSDKENDGEQQEKNDSEEQEGDKRNDSVEN

KENDSKGKEHNKENDSEEQDSDKVNDSEEQDGDKVNDSEERDSDKVNDSEEQDGDKVNDS

EERDSDKVNDSEEQDGDKENDSEEKEHNKESDSKEQEGGKVYDSEERKDKEEDSPFDSSK

VGQQDTFGQGNFEDQEEEDEGESDMRKSVNNIAAQSSWSNNFK*

>TRINITY_DN23444_c0_g1_i1.p1

AEQQEDVQALLQDLENHKPEFEAVKGAAEQVIVNQPDDVYVVEAQVQYVTKLWESVGVRL

GHRQQQLADVRDLVNQYRDVVRPVQELLARSEEGLIPLENVGCDVDRARRELNNTKALLA

TLESREPEVKQAVKLGQNLMMSADSDSPDVPSLRKEVAQLPEKYADLKSRLQEQEAALEK

IARDASLFHKEMDGLEAWVTDAAESTAVQDPISTNPAVVNKQLEETEAMQDEIARRRVTL

ERMEALGKDLIEDSNENPWVLADVRGKLTKVRVLIDRLDERIEQRRAILQNILLQVQVYE

VMYDELMETIGEIEDDFNNVRPVSAIYPVVTEQKENVEHFVAQSIAKKEPVYEKVLEDGQ

AVLDRMEPGEEKDQQQEKLDNLVSRWSNLKDKTDNLRRKIEEVQEASKKHMSKTDPFKDW

LDEAEKTLDRIKPVSCDEDVVEKALEELEQMLDDVDAHNPDFEDVGMLANELIDCCQADG

DVIKADFADLKQRYEN

>TRINITY_DN25259_c0_g1_i13.p1

MAVGIYARISAKDYASLTGDTGFQTAANIMIAAGALVMIIGFIGCCGAIKENKWLLLMYA

FLLFLIFVLEIASGILAYSRRDEVISKIEETVKKAIEEEYGQPDKENLKKAVDNAQQKLQ

CCGVESPSDWKNSTFNKVPDSCCKKTGCNTAITENIYTEVSREYLTQFNHHFTPKLIKYI

FP

>TRINITY_DN26948_c0_g1_i2.p1

MEGIKKKMAILKQQLEDATKGADAAEAKLKEAEARAVTAENEVGTLTKELQRVEDELDAA

ESRLAATNEELVEAEKQADESERVRKGLEDRGASDVERLQALRRQLESARSRAEEAEAQY

EEVSSKLNVLENDLEEAETKADDAETRVKILEEEVTTVGNNLRSLEITEGKASEREENYE

VKISDLKTKLEDATIRADDAENRVKELEREVEDLEAKRDDAKKDYENVKDELEKTLQELH

EM*

>TRINITY_DN271_c0_g1_i13.p1

MASVCRQNYHEESEAGINKQINLELYASYVYLSMAYHFDRDDVALPGFHKFMKKASDEER

EHAMKLMKFQNQRGGRIVLQDIKKPDRDEWGTGLNAVETALDLEKHVNRALLDLHKVAEK

HEDSQMMDFIEGNFLTEQVEAIKQLGGYVTQLKRCGPGLGEYQFDKLTLEDDD*

>TRINITY_DN27513_c0_g1_i1.p1

MCNWQPLWEDNIDELIHENNAASRSDSEDERKPLVESDEYHKLTDEELKWEGAGQFQPSK

LNKSLFMEFDKPSPAGQERTKITQHTTTKKVVTVTKEEVVVSNKVEPIESRPSLVVESEY

EKGDRAVVGRLQEVKTPDSDSDDEIITPEMKLRKIEQERRRVELEEIERAREEERRRRER

EEEEESKEKEDFPDDEFDLKVKTRSVNKIDRSLLGQFSQEDRKEEGVPRRRKPQETQSTQ

AETISISKTVEVVESQPDEGVPCADDRQVSVTVIKESDIADDEFERKVLGKKIGKINFSS

SPFHGEPEQAPYATQPKQPEPTRIDVVVEAKKPFEEVIPVTTTLEIVESQPTEFGPGDNE

GSDEVSLNKDFTDDPFERKVQEKKIGKINLGSSPFLAGNKAEEPRPDIRRKRREEVRREE

GTKEEESEGLAVEMVERAREQPTEASPVSIENDFEDDEFELKVKKKEVGKLNMAQFEFQQ

REAEEKEQRLRQLEEERRRKEREEKEKLQREEEQRRLQLEAEARVRAEEDERIRQEEEEL

ERLRREDQRQPNLEIEVTIEDREPKSVGKLDITKFSQFQNEATPPPKPPRTYEAQVRQPP

QEPAIQTIEVSETRSAPDVFSLENRGEEIDYEGKRKDVGRLNTDWYSRQQQQEAQEAQRK

AKYLEEERMRLEREEIERSRQEEAFNQNANPDDGAPERESTDKPSSVGKLNLDKFSQFQQ

SSSPPRNKPQRVEVDGGPKAQPREVVVVSNVAEVESSPEAEFEVDRSDKPRNVGKLDHSH

VAMFSNKGDTQTTPRAPTPDRTRSASGPPKRVEVITKEDAPSSPRSAEQEDHDERVKNVK

KLDVDRFIQSRREESVERQQRKKQLEEERLRIEKREMEERRKEERRRNQSSVSDRVDGEV

IELSRSSREEKPVQINGNTEHDEKPKNVGKLNLGQFAQFQKADASKPNTTQERAPRQETR

GNDASPR

>TRINITY_DN2817_c1_g1_i3.p1

SECTRESETNKMRALTLIAVILSYFDAGLCCDPGPFVEKHEGRKLCVYLDTKGIKTIGVG

YNMQNKDAPDVFKSIGADYQKFANGPTTPWNVKCNCSAVPCLSDEQVDELFSLSLRTAVS

DAQAVIPNFSTLCCPVQNVMVDMSFTLGRARFLAFNVFAKLVEQENFQAAGDDLTLSKWC

VQDAKNRCLEDAGIVANGCGECVDPYPQACNSKASACCGSELTCCPGEVIFHSFITKTFK

EMLCCPLPKATCCPANKCCDSEHPVCCPDNQHCCPKAYPVCRDGRCYAANGDAGSDEAVP

SVPGTPSL*

>TRINITY_DN28402_c0_g1_i1.p1

YNSEMQAFEPWLSETEKKLSELKVDSPVPEDIAKQQKALEAIRDDVQKHTPAHESVNSIA

DALMDKCKENSYVIDAQIKDENKRWNALQKELEAKEEELKQAKDAADKFYDALGVVEETL

QKAENTLESCEP

>TRINITY_DN2863_c0_g1_i1.p1

RATVDSRSPTNKVFYSLDWNCPFLIMKDDQIPLRLAMYLSIFVAFVSIQIATAAVNGSKP

ADPNTLKCKVYNMTLKIVGTPYEDSLATPGSPQFNKLRIEVEVGVMQVYDGYKPFIGVST

ASFSKAPDGKVLVQFLAEFNGNASTHLQTLVKSLATGKLGRLTVDKALKHAACYKAPTPP

ICPTPCPSACAPACGSSCCQQYQPAAAAPAMMPAAPMQLPPVMPQQVTHSTCGPSCPTSC

APSCSSGCCNTVYSPYGKRHHAPRPKKEKKKSHVVHLLHKIHKGH*

>TRINITY_DN292_c0_g1_i10.p1

MGVWTNVAHLHNQSLVVVILVFMSTTYLASGRGVRNVNRFPEADPHGDGFAPGREDARSS

LEIGTLHKRENKLDNRYLENQDGKYISVTASGAVIGKDRCDSRDLFTYEVRTDKSSYLLN

KATGRYLAINGSGILYTSFNGRSADADLGLMRSGPARHFYIYRMDGNGGELYFALSKQNQ

KVSKQEADVVHVKSICN*

>TRINITY_DN2941_c0_g1_i1.p1

MEVLKLLILPLLLCTLVKGEEEKLKIEVLEEAKECDRKTKDGDHLSMHYTGVLASNGKKF

DSSRDRNDPFEFALGRGQVIQGWEQGLKDMCVGERRKLTIPPHLGYGDHGAGSDIPPKAT

LIFDVELLEIKDSPPEGEGTQEPSNVFAEIDKDGNKELTHEEIKNFLTNQEGFPNDDTSS

NDNIVNEIFQQEDKDKDGVISFEEFSGPKHEEL*

>TRINITY_DN3014_c2_g1_i10.p1

QQNFRVDSFPHCGFHISSVKMKVVLRFLCLLPLAFAKSPRSYAKNPCYIPELDTGIGEVI

KTARPHEYLKAKDIPKEWDWRNVNGKNFASTSRNQHIPQYCGSCWAMGTTSAMSDRINIA

RKGQWPVNYLSVQNVLDCGNAGTCHGGGMRGVYKYAHEHGIPDETCNNYQAKDQACTAFN

QCGTCKTFGDCYVVKNYTKWKVSEYGDVQGREKMMAEIYARGPIACGIMATDSLDKYTGG

VYKEYNSEAVINHIVSVAGWGVDKTNGTEYWIVRNSWGAPWGEQGWLRIVTSTYEGGKGG

DYNLGIETTCAFAVPIV*

>TRINITY_DN30599_c0_g1_i2.p1

ANTRVNMFTRIVLPFLFALALVECKKIRDVPDNVQLRKDSDIDLVSVLESLAPVEGVADA

SVKPNGEGIERFRRRTDPGEERTATAGLDQRSDSSIQEDLASMMKGGPPSGDGEYDSGNG

VSATFSKRGDIEGEVASGSSESSGNFQEVAPEEKQSASKPEQTVSQQASEASVLTSSNGS

SSNQTAKAVQNNVDGNSSPSIHASAEGARAEELPNPTTDINGATAADDESSGSGLTADEV

AFISGLHKAQEAEDNSAQKRVLVKLPGSDGEDEEASEDIENDTSDHSADTLDDESSGSAE

DDTENAPNETGSTTETESVHTEKQHEDAMIDVTSGSGINFVSGLGQEDEALPGSIGKEND

IEAVESHNEIAASGSGELSAAKINSQDSSAISSEQKPDQAPGVKDTGSPERSLQQEEPSG

SGEQSVEENKQQVEQMANQVQDQAVQTATSASGSSEASPSELSSGSGEREASDELPGSVG

GKLEEKDMTTSGTSTNSLLPEDKANEAQATSESPKIVTPAENEDASGSATFSPQDATSGS

GSDLEDLGITSAQEDSLPGSIGAVGPNLMTMASHDSATAPVMGNSKDDIQSSASGSGESP

LETETSGSNTGSKRTLASGQEIEVSSAAALGDAENTAITSGEDASGEASGTSSDDSVAIS

PKQNDEKLPGGLGYQDLELLSSSGEEIASGFHYSSDSGSASGSSGDAQEDVLTLSSGSGK

ESNELDSSVSADLGSASTILSSGKTVTENAVKKTNLPGVPHVPSGSGYTSGSGMEYGITA

AKLDHKDNPPSPVAGQNAESLISGSGEEQMQSTDSSASGSEIQEGTKVATEVSGVQDSAS

GSSELQGSLPGSSGTSDVLAGLKSNIQKIPSVSSGIQDTSSGSSAPQKTLAEDLETQDIS

ASGYPQDDIAESSGVQESLLASGSGSPEATVRVEEASTADVQKANNKELPQVKKTLGLSD

KEIEVGEVAPGAGEGSGAETNPKESEGEDQPANIIYRDEAANSSNILPSSDLSAALGSAT

MARLPFTLGSGSAYDFGSGLGTDYGSAEIFSGSGFTGTLDLTPATDPSEAVVNLFGSGND

RDSEDQPDKDRKGAYPHKRMGHRQRIPDTDNYRDDAEEKSEESNDWPKEGETVDQQMLDR

MMISQILEQNLTLFYGGLTGRPGPQGPVGDKGAPGEQGAVGTPGPAGPLGEIGSPGRDGG

AGPKGPPGFPGPPGMKGDQGPPGMPGTAGEPGAPGIAGPGGIVGPPGPDSIVPNCSYICE

GERTWLQCKQYEIINVKRVFWGREDKQICAEAPVGLTADKNCETDPDNSLKKVNEQCRNL

QACELVASNVFFNEPSCKNTFKYLKICYECVPDQANAVDVLLQNGKRRKRGTLLDDILKK

KKALAEEKTITKLWQQPYHGKVV*

>TRINITY_DN31096_c0_g1_i3.p1

DANGTKVTQLTEGRDMDKRVALILCFCMAVAVRAGVYRDALLRDLLDEVDRLDALKDETN

CRDERNDCAAEVARYARKYGGDLCKDQQRYMETFCLATCTKCGPQGELKPTKAPEPGVCE

DNIGTCPIRVNEDPQRCEHHFYIENCRLSCGVCS*

>TRINITY_DN3190_c0_g1_i6.p1

MPVTPENPLSSQLKHSCKDDRKSRRLNQKRDLPSAKAICRTTMDSCDAPNEPGLLYILQE

GNGNYYKVGVSKNEESMKSRLQNLQSGNWRKLTKLQASKVSNMNKAEQYAHDKLKALQVK

AGGGTEWFDGPLATIKDAVDEAVKKYPPK*

>TRINITY_DN32375_c1_g1_i11.p1

MMKVTAILTQGRQDYEQWVKTYTVSYSDDGTSFMEHTENGQKKEFTGNTDRNSVASQDVA

PPIVARYIRIHPTTWNRHISMRVEFLGCEPAPPTTAPTLGPSTPTGAASSGSTGASSPST

GPSSGTPSGSTNPSSPTGSPAPSTTAPTLGPSTPTGAASSGSTGASSPSTGPSSGTPSGS

TNPSSPTGSPAPPCKQPLGMESRKIPDDRISASSEWNANHGPSNARLNFQAGGGKTGAWS

AKTNDVNQWLQVDFGKKMKVTAILTQGRQ

>TRINITY_DN32375_c1_g1_i5.p1

MMKVTAILTQGRQDYEQWVKTYTVSYSDDGTSFMEHTENGQKKEFTGNTDRDSVVSQDVA

PPIVARYIRIHPTTWNGHVSMRAEFLGCEAAPTTTAPTQGPSTPSSGTPSGSTSPSSPTA

SPECNQPLGMESGQIPDDRISASSEWDSNHGPSNARLNFQAGGGRTGAWSAKASDVNQWL

KVDLGKMMKVTAILTQGRQDYEQWVKTYT

>TRINITY_DN3274_c0_g1_i6.p1

MDSTFQILLISMAFFGLSVGNVVDLNNNNFDSVVNGDKAVLVEFYAPWCGHCKALAPTYE

DLGKAFAKAEDLVIAKVDADGDKDLGKRFDVSGFPTIKFFPKGSTEPEDYNGGRDIDDFI

TFLQDKTGERARRVVNPQAVTVLDPSNFDKVALDTNKNVLVEFYAPWCGHCKALAPVYEK

VAAAFKNEPNCVVANVNADSHRDLAEKYGVSGYPTIKFFPKGSSEPEEYSGGRGEQDFID

FMNEKCGTFRTAGGGLNEQAGRIEKFDELAKEFMANTGERASIKEEADGLVDQQENTRLA

SYYVKVMERIIEKGDSFVTAELERLGRMLEGSLSANKMDEFNMRKNILQQFKDAAVKTEL

*

>TRINITY_DN329_c0_g1_i14.p1

MEFKLLSLCAVMVIFGITSSDAELIAYPHVGCYKGWKIRRYFNQDLGFWRGDDAIMQCYQ

AARKEGYKIFGITEGKCLSGHGAEKHYTSFDKSNNCNDKGTGGRNLYDIYLVAGGKQSCE

GLADGEYQDTTFCNRFYTCTKGSANVQLCPEGLLFNPANRECRDAAPCPRGAPCNYAPDG

EYIHPTSCRKYVVCHKGYAFEASCPAHLWFNTETKECENPANVNCRHDPCMESPCLNGGE

CKTSSQEQRGYTCVCKTGFTGTRCEKEEPKPCSANPCKNGGTCKDLGGNKYECSCKAGYG

GKDCNEHSVLAGSKILQGHSDYSKKLEDYLRPVEMKGKTWKLCFRASENHFLSASFHSHC

NHKGPTVTLVRVGQYVFGGYTDKDWISSEH*

>TRINITY_DN344_c1_g1_i4.p1

ICKLSTRRLSPLSYVLTGIRILRLVTQMELRQGFKALFLAGLFAGLAQCTISGAIQSGKT

NVTASAQAFSSCQEVRVPHPFTSAGNIKVLTSFARGNENDKPLDGGTTWVESVTNETFTA

CVLEFGRGSNGSAQVNWLAFQSAPAGVQHGSVSYDLWTTGTKCKRVNFGQRFRGVPKVFS

TPRHNVLQRSQDAMLVWLEDLTEDHFKLCLREARNFDGPHENIEVDWFAYTAPPKNVTHT

DSLVFSNLGSPTKEDNFALCMTVNFTGTHFYAPPVVLASATHRQDGSNANSLSPDCNAIT

TWVEYTSTRKATICFKDFSGKGNVQDTVTIDYTVVGDLDPCINVTCEHFASCKAFGPFDA

RCVCRDSCPSYEEPVCSSNGTTFDNECLFEKETCDLKLNFTMQHPGSCEGFPLQNGRTTV

HLESRATCTLLRFRPYTFYPDRAVHVQLTINHYDSTDKKLVHDAAVPWVENVNADSFELC

MARAGHNERGVLSNASADWLAYQGAPDGGVGGKVRMNNWWTGTKCETVNLPVGRFTEKPL

VFLTPEHYNPGLERDAASVWVEDVTQSSFKVCLRELQNFDGPHRDIHVNWLVFSKLHRPL

FTEHGSAYFPNGSPPPEENNGAYCQDVAFSHSNHSKTPEVFVTANHSTGGANLDAVHNGI

TAWLENVNQTGFTVCLKELYETRYDPLSVTYTVLSDICEPGWSFFNGYCYLTSSSCTGWR

SAENRCEAAGAHLATVHNQEENVYIQHRHNGEKAWIGLNDRSVEGTFVYTSQQRTNFTFW

AENQPNNLKNEDCVHTLGVAGGYTWDDVLCSDCQNYTCMKDLDECARGVHSCHRDAICTN

NDGSYSCTC

>TRINITY_DN3520_c1_g1_i1.p1

MAYRGREYNDETAANLLRSVRQQEAQLEILSRELQEERRNITAQLEKNKYNSETASVSSL

GSSTDESFVWRGDGPGSIGDDAELTDEESRMSGSALVDSCLKVLQERGLNSPRDDQDPLY

SRQNMDSSSTVSGHSNSLVNQDWERQLMEADLTPGSHGQSVKRVVTHTEMRTVKTVDGRV

VQDSYKPGSTHTTIERYKYGMNGDGRNTPPVSGDEYRSGRRGPGSHSSVEEYRSQGSRSG

YSSADEGRRTPTANGPPGHMSDGYHTPTGSRSGSQSGYGRSSQSLPRQSGRPTTPRGGSS

ASMPRMSSTARGPSTTYNLSIRVGDVKGSGTDGNVYIQLFGERGNTAKIQLRQAGDNKNK

FEKGRTYKFTVDTVDIGKVDRIKLSHDHTGYGSGFYVEEVEVEVPARQDRVKFPCRCWLA

QDVDDGKIEREMFAVSQLPNKSYTMSVKLGDVASPDTNLYIQLFGDKGETSKIMLRPVGS

QLNKFEKGRTYKFTVDTVDIGKVDRI

>TRINITY_DN35764_c0_g1_i9.p1

FFNQNRENMKATWYGINSILSRKKSTAQTTKVIIGDKQIEDPVEVSNAFNEHFTDIGPNL

ASKIGISNRNFNDYMCQCDSSFDLKLLTAGEVLKLVRELPSGKADGLDGIPARLLKLSIH

LTAVSLTHIFNRVIETGFIPSDWKKARITPIHKDGSKSDPVNYRPISVLSAIAKTFERAI

FNQTYQYLVQNNILGKLQSGFRPLHSTLTALLDATDNWYQNIDNGLTNAILFIDLKKAFD

TIDHDILLKKLEWCGFRAKALQLFQNYVAQRTQLTEVNGVKSKANIIRCGVPQGSILGPL

LFLLYINDLPNCNLLSQVRMYADDTNLTYVAKTQVELVSQINKDLLELKQWLRANKLSLN

VVKTKCMFVGTRQKVLSLASQPNINLDDQQIDRVETYKCLGVELDETLTWGPHISELIGK

VANVLGVIRRLKPHLPRRTLITIYKTLGLPHLDYCSAVWGNCGKGLALKLEKIQNRAARI

ITDCGWDAESQQVLADLNWQSLCVRRDNQVKCFMYKTMNNLVPRYISEKFNMTSVIDRHN

FRNTNLNLFVPRPNKEALKKSFSYRGAVLWNSLTPQAKQATTLEAFKTHLM*

>TRINITY_DN3611_c0_g1_i1.p1

MKVLRLVQLLLHFLLAANACTEFRVSSEVDKSVVVGRSEEIMVSMNSYVIVEPVGHQHSA

SVPKYCPDGVATMTWENQYQVAYLDAWRTPFGLDGLNSAGLSVGSLMFPDFSKYQEVPVE

ECGNALSQLELPLWILGNYGSVQEVRRALNSRASFPLVWGQLLDNYLFEVHYSVYDATGD

GIVIEFSEEGRRMFNNTVGVMTNSPPYDFHMTNLRNYVHLSKFAHEPLVLGKTVFKQTGE

GTGLLGVPGDFTPTSRLVRTACMAHFADKVNTSTEAVMLAFHIMNTVDIPKGVVTSPEGA

SDYTSWIVVKDLRSKSLYFRSYDDLTIRVVHLADVEPTGGKRELKVDRPSGFEDVTDELE

VVPQRAAGQKLCFHGHQ*

>TRINITY_DN3704_c0_g1_i15.p1

MSEHDKQIQDAARKMEASATTPLEKLQAACLKRGASGIKGLSRTFRIYDDDGSRSLNFEE

FYEGMRDYSTGLSQDEAKVLFGDFDKDGSGSINFDEFLEHLRPPMSSSRKSIIEKAFSKL

DKSGDGVVTVDDLKGVYDYKNHKKYKNGEWTPTQVFEEFLKSFEPDPNSRDGRVTKEEFL

NYYSSVSASIDQDSYFDLMMRQAWKL*

>TRINITY_DN3894_c0_g3_i1.p1

MSANQPPQDVEMEASTPQTEPMAQDQVQNAAGGFVWAVDDETRFRRFLILGTEGGNYYVN

QQQLSKENAQALLRLIAAGRGPEVVEIIKEYSVSGRCAKQDTINFALAMCARSGHKETQA

AAYGILNEVLRIPTFLFQFVEFCEKLSSYVQNGETKNSTGWGRAHRKAIRKWYTEKQPRK

LTMAITKYKQRNGWSHKDLIKLCHIKPDPEKVSLGVIFIVKYLAKGLEAVKEEASKSGVS

RDIIYAFTFLETVEKLPQMDEGEILKAIREFGLVREHIPTQHLNSKEIWSALLEDMPPMA

MIRNLGKMTAVGLLEPLSEGAEKVKAFLADEERLQKARIHPFKVLLALKQYQAGHGEKGK

LNWTPNRQIITALDQAFYKTFKFVEPTNKRYLLALDVSGSMSWGGCCGATNITPRVASAA

MAMVTARTEPDYYFVGFSHHLVPLNLGAEMQLDEVIQTIEQVPMGGTDCAQPMLYAKQQK

LRVDVFIVYTDCETYAGGVHPSEALRQYREASGINARLIVVAMTSNGFTLADPNDSGMLD

IAGFDSAAPEIMRQFALGGL*

>TRINITY_DN3924_c0_g1_i11.p1

MRSVSLALLATLGLVLLKSTASLPVSPVPPLLNKLLKDQNVTLGFILKGLQGPPGRDGMP

GMSGQPGSMGSPGMKGEPGSPGFAGSPGLPGPPGFQGPPGMDGLAGSPGMPGAPGFPGGS

GMPGPPGMNGLQGPPGPPGPTPIRYNGTVKCEEDTAWLRCNEYKHISIISAFWGRRDFGL

CTEHTGNLKADKYCPTTPKFLTKVKDTCEGTTMCEIKCTKLFFDDKDCSNIYKYLEVYYK

CIEVINGHEVVNEDNLLNANFLG*

>TRINITY_DN3994_c0_g1_i10.p1

MNTFVTFSGTVLLILSLGFRVKAVEECQEGQGDQVDGCGYFATQGYCDESSIYHAYVISH

CRGSCGLCTPAPTQPPEVDPSACLQAHNDKRALHVDTSNLAWDNTLATQAQEWAEHLMNN

VGGLQHATSQESNGAGENLYWKKAGSASTCAEAVESWYGEISYYDFDNPPYDIDGGIGGE

DIGHFTQVVWKGTDKVGVGLASQVTSDGYRETYIVARYSPAGNVDGQFGSQVGNLK*

>TRINITY_DN4124_c0_g2_i1.p1

MGDEGIRGEIGTKGSAGDMGIPGTPGIEGAPGRKGVKGLSGDSGVPGNQGADGDFGPQGD

RGTKGRLGFEGPRGRPGQMGTQGAPGKPGRQGPGGSTGPRGRPGADGRQGDIGSAGSRGS

RGDQGPQGGVGQPGLNGAPGPDGETGNTGTKGLSGRPGRPAGKGSRGEPGESGRPGDQGI

VGASGTDGPPGTKGHDGLRGAPGAPGSSGLAGPRGSRGVSGVAGPTGQTGATGRKGEGGD

SGLDGQSGPSGEEGSIGSPGEKGTGGERGRPGDVGIAGLEGRPGIIGPKGRAGDNGAPGT

VGARGAPGASGLAGDVGISGEQGEPGVAGASGEPGNPGPVGDKGSVGIPGETGLSGRTGL

KGDRGDAGLQGPSGSQGPKGNDGEKGRTGQAGLDGDRGDDGERGRQGFRGSEG

>TRINITY_DN4164_c0_g2_i1.p1

EIAENGRGEGRLLSKLRELLNYYVMAEQAKPNLSEVESFEHSKLKHVKTQEKNTLPSDET

IKQEFVPDELPDRSELGKFDRTQLKKTETSEKNSLPTKQTIEDEKRTAPFSGVEVFQKST

LHHTETKEKNPLPTPQDIRSEMMPDRSELPDRSEVATFNKEAKLKHVETTEKNVLPTKEV

IKEEAVDSRAEVKAFDQSKLKHVDTTEKNPLPTQQMIYSEMMPDPSKRPDRSEVANFNKE

QKLKHVETTEKDVLPTKEDIKEEAIDSRVEVKTFDQTKLKHIETEEKNTLPTAQTLREEL

VPDNCPVRSELKGVAGFDSSKLKHVETANKSQLPTKEVIEQEAFDSRAGVKSFDHSKLKH

VETAEKNTLPTTQEIRAEMMPDTLPDRSEVTKFNKEQQLKHVQTTEKSMLPTQEDIKMEA

IDSRAEVKSFDHSKLKPTDTKEKNVLPDAQTLREELRPDVLPARAELKGVEGFDKAKQLK

HVNTEEKSTLPTQQVIQEESRETRAEVKSFDHSKLKHAETQEKNALPKAEDIAREKAAS*

>TRINITY_DN41751_c1_g1_i1.p1

MLRYAALLLLLAGLFERNTADNDNDNPLKVKCMEDSMTVILKKDNLTQINLDTMSLKDPN

CKDVTDNGTHVSMNVPFDSCKTEHNTTDKTIVYYNSLLAEQKDAAPGQIISRDFQAEWPF

QCTYARTKILSVVSFSPREKIIYTKSSEFGNFSYLMDIYPSGEYEAPYDSYPVSLDLGDK

MFLQVEVRSNDSQLALFLEKCWATPVDDPQHDKKYTFIQDGCTQDQTMVYNYKESPVQQF

SIDAFRFLQEQSDVVHLHCMVEACRMGDNSSKCFQGCAGDRRRRALELDAAEGQIMSLGP

ITVTAQKTQSAAGSSSVATVAAIAGILALLVLVLFVALIVVYKKRRAPMPTVMYSKPGSD

DSNRLV*

>TRINITY_DN42621_c0_g1_i1.p1

DSGGYSCIARNRFGENTMTSTIRVVEVATPSISAPEKHETVTSYDGESVSTSIGNNIETV

AETTITVHCVASGFPEPSITWQKDGQLISQSERFGISRNGSLSISKALPSDSGEYSCIAR

NRFGENTMTSTIRVVEVATPSISAPEKPETVTSYDSESVSASIGDSIETVAETAITVHCA

VSGFPEPSITWQKDGQAIVGGVRHAISSNGSLSIFKALPSDSGE

>TRINITY_DN43166_c0_g2_i4.p1

MAGRFHRQHCFLCDLPRYPWAMLHDFSEPVCRGCCNYEGADRIEDAIHNSRLLRRTWENN

ENNHGRNATQERLNSAGSSVSSTPSPPPTNGVYQDQRRPSSRFQNHYRLAAEEAAESVLS

TNMGSHPTTSAPDNVNNINSGGVGRQRAQSIGSREAERRHFVADDQRQPLPNGNPFSSRS

QASLMTQNFVDSPRPDRIRETLSTLNQCAPFNIRLKKDHNIIGVMFAFEIMNRAGSEYEL

KLLSEYPKGSGNEYLTAAGVMKQMIVDSPIVKDMGRGATSSGLKYLEYEKEREKNDWRPL

SDFLPEAVRFFKEPVNLKLLPQPQLDTVNPSLLRLKNPCYQRPGIPVSRKHKMAMEMEEY

ELAQGKRRMHPLRLSRDDIHHQHWMQSQVDPSKLPASSSGMIAPPGMPVSTIPSASVPPI

MAVSQGKMNAVVLPGSDIHGRVPPKSPMAPGSRLDHAREESVGHLVMSTGVVSGEGLSGR

QQTSPRRTTTSPGMKSAETQSNTQDGEMKERGSGINPGIVTCVICHEKLEDTTHFVQCPS

VPHHKFCFPCSRESIKKQAGSEVFCPSGERCPLQGSNLPWVFMQKEIATILGSELALKKE

KET*

>TRINITY_DN4573_c0_g1_i2.p2

MSADLSKEQIQELRDAFQLFDVDGDGTITTDELGTVMQKLGQNPSKKELKEMISEVDEDD

SGAIDFEEFTLLMAKQLRQASEAEAIDAFKAWDSSGSGCISSKDLTNMLNEVAKSNRDMR

LTKQEIEAMVTEVEKISGGKIKFETFIKCFK*

>TRINITY_DN46568_c0_g1_i1.p1

EEEKEEKEEEKEEEEEEEEEKEEEKEEKEEEEKDCPVKTTDGHCCVFPFTYSGEVYNECT

DKHSFSKWCATSVKEDGSVGAWDFCEDEEEEEKDKEEEIEEEKEEKEEEEEECPVKTADG

GCCVFPFTYSGKVYDECTDKHSFSKWCATSVEEDGSVEAWDYCEDEEEEEELEEEKEEEE

EEEKEEEKEEKEKEEKECPVKTAKGGCCVFPFTYSGKVYNECTRKHSFLEWCATSVEEDG

SAGAWDYCEGEGGQEEGEASEGEEEGEEGEEEGEE

>TRINITY_DN4697_c1_g1_i2.p1

MEGYVGDGTECREKTPDIGATPGMRMKYINEYLAIGCGPENMMVVVSKSMLEGLRRTDIS

LIDPRCLPSDNGTHYILKTNLTSCGTMAKTTEDAIVYTNCVEERPDPEAIISRLPDVSIP

FRCYYAREGFTSAKQMNISRKRIRGKARDDGEFSLDLGVFKDEDFTDPYGDQDFPIGVSV

STRVYMQLKVSSADQNLAILAQHCYATPDSSPNNTLRYDLIRTGCPVDRTVQYHQVPKSG

IQRFSMKAFQFVNQDPFVYIHCAVIVCNATDPDSQCNRKCDQETFGRHRRAAAAYSSPVH

SDDLVQGPLLRLRREKSQASTSSSSPAMYLVVVLAVASVGIFAALIALLRKRFGARQQAT

AAPAPAAV*

>TRINITY_DN47584_c0_g1_i1.p1

LEQASPDDDDLATTMRQPVKPVPSPRSPRRQTDVKGATTPKPRPRLSPKENSPRLGDVRS

LGSDTIDGPTDKDHRPTVPQRKKMLESSKSGPQIPMIRTSIHDETVESKRETPETGIHQK

GRKSLGRNSSGPAFELSESSDDEVGSRHAQESSGSRSMLGRQIPARVEEKPTSRQPKPLP

RG

>TRINITY_DN48421_c0_g1_i1.p1

MDVADLSDAYSDILQYSDPVFKDYGGKLKFGGKIVTVKCHEDNVLVKQALGEPGDGKVLV

VDGGGSMRRGMLGDRVATLAVQNNWAGVIMYGCIRDSAEIAKVSLGVKALGTFPRKSEKK

GFGERDIAVKFAGVTFSPGHYVYADADGMVVSPKELTLPPPKL*

>TRINITY_DN4924_c0_g1_i11.p1

MTTTVEPKVEEKEEQPEKKVVATKVTGTVKWFNVKNGYGFINRNDNQEDIFIHQSAIIKN

NPKKFLRSVGDGETVEFDVVSGAKGLEASNVTGPDGNPVQGSKYAPDRRRYYRRFRDYRR

GKRRPRPRHDSATNGDEKDAEDREGEEGENKPPRRSYRRPYMRNRRRPRSKDGESAEASA

DGEQSTEQRDEERPEGESGDSRRRPRRPRKPRYRRPRNEDGEEQGDNQDHENREGDAEER

PRRYRRPRFRRPRRQTEEGEGEGEGRGKEETKNGGGEEPKAEQSAN*

>TRINITY_DN5142_c0_g1_i1.p1

LRPAWKAFKMAYAKSGSEGKTRLEIMRDTARDFGLFLYNKEKGEVMGRNGKSWAKITVFF

IIFYSCLAAFFAAMLAAFMSTVPPREEGPKLTQYLAGKQGLISVPTEIEADFASDPSKYV

EQIKKFLKPYEEQGGVNKDGFANYSCDTRDVNELVSGKQCRFNLTALGPCYGGDHYGYKE

GELCIFVRMNKVFNWVPEPNDGTEFGVELDCYKEGKKDGPNVKVYPEKTPGFPINYYPYK

MQDHWLAPVAAAHVTEVKDGDVILCEANAKNVEKSETFRVARGAHGKTRIDIG*

>TRINITY_DN51623_c0_g1_i1.p1

MHEEVARKEARMLDDGSGDIQLYRVKDFNMEEVPKDKHGIFFSGDCYVLLYTYQDQGGRE

KYVVYYWIGNESSKDEQGTAAHKAVEIDDQLGGKPMQVRVVEDKEPRHFLKLFNNRMIVY

QGGHRTGFKNVSSTVQGAPDGLKLFQIHVSDKEFRAVEVVPRTASLNSFDAFVLDVRSSV

YVWCGKGCAGDEREFAKEVAALVNPRGRDYQLLVEGKEPQQFWNVLGGKGPYASTKLAKE

DLQDHPPRLFHASNATGRFIVEEVLDFEQEDMNEDDVMILDVFSEVYVWLGKDSNRKERE

LSVTAAQEYLQSDPRGERSNVPIYLTKQGCEPLAFTMHFMPWDPDFWDKKTPYSAMLQKV

GKDNEERAPVVQQIRKASSVAKQTYSVEELRKPPEELPLSVDATKKEQHLTDADFEALFK

MTREKFEALPAWKQNNAKKAADLY*

>TRINITY_DN530_c2_g1_i19.p1

MPTTAPKRKKRPVNGGGAPTYTESEMDEFLKRQNLYRKPIAKDGSCLFRAVSEQVHQSQA

NHLDVRKACIEYMRKNKEMFEEFVEGPFDHHLFRLQDPKEWAGQVEISALSLMYKRDFVI

YQDINVEPTKVTDNGFEDKILLCYSNGNHYDAVYDIKYKKNAAFCQALVYELLYKKVFPE

LDRRDQGRKGGMRTLQEPLGFSADLYENGNIPDEFRENGNDDNDGWTEVKSRSQKAKSAR

QNRTVEQEEARDDNSLRQSNEQKYQWEIHRSVDVEQYRNVAIEVWEEDKNNQQRQDLAIA

ASIQYEPNDKCFVYLGPPKVPEEKLYSAIVKDTCTSQGYLHVYVAELSRRLTVSVQCLKP

GDGHQAYKDLTGYYRKGGEGGSPSGDDGFKDDGRGRRRKGIPKGRRGFNKGDEQEDGAQR

RPYQDEGFGRPKPGGQREKFNPRRGRPARGREDRTQRDEEDAKYQEQMKLEELRDKDPKS

FPFLPTQHTEKKPSAPDTPVVTAAVMPVVTSSATTDAAAEFWRCRRNQKTKEATSPNASP

VMSPTATDAKSSTPGSPESKVPLSPTPLMPGSPEVKVHTAPAVPTSQQPAPTQLPTKDES

SVTKVTKDMKSKAEGEGAKQLAEAKSEVKSGKDGENRAEETVLEKGDKEGRNETAIRDDS

EKGGELRTEEAAPRAKEGAVDHGGKKAANAARSGVKAPEVKAPEINVPEVHAPEVKAQEA

KALEATAGAAGLSFPGPSPVTHSAGMHPTRGGGVVASHAEHIATENKPIEVQTNVAAADA

GPKNLLKGLSASKANTPNLSKESQGPAVPQPERSTVTTSKLVPEAAKVGEKPRPQEPISA

KPEPFKSELPKGQDGRPDGVQSTRLPHGEVVDGVFKPYTDEKRLHKKDDAMADGLTKPQP

LISADGGPSEKKTVKFADPVKEEIEHRSFTAVPKGMLAVDLAAHARNSPPNSRKSGKNTG

GKNGTDLARKGPKPSSPVPGLIPQDLSTVAVLPANQTEKNLSEERSNRNNSSPDSTTRQP

TQPPAAPEPLLNADVGVPPSVSPQPPFQMPYVPIQLPATNLTGPVQFQSGISMDPNGSDL

PQDVSTLRFFYNLGYQYFIGLQSMMYYPMWPSAQEHMQQQTPVAVSVGQQHYPGMQGMQP

MYPPQPVPGYHAVHMAPGNPEMSVASFDRSSSDRSSPAQQTAQQVPTQAQARPQVLSAQQ

QQTVSLHPQQSAFINQPWNRGFKRSHFLPHTHQPRAHAPANLGNPKPYKHKQKHKPRNDG

QPYAPAVSQFHGQSPAQFGVTGFPAGAQSSASTSSPNFYLPDHGGMKGAGTEPTLGAQPF

MNYPGVHPGPHTAANQRGQYS*

>TRINITY_DN53645_c0_g1_i1.p1

MFTSIFFLCALGIPVITGTTFSEAGFAADVEIPDDEMQVGAALRIGSFNVQIFGNKKMES

SLVRDILVKTILRYDIVLIMEIRSVTDDAINELLSLVNRHSSPDGVYAMKLSARLGRSNS

KEQYAFLYRTDKVAAVDSYVFNDAGKDVFQREPFVVRFTSNTTYVKDFVFVAIHTSPSDA

VKEIDHLVDVYDNVIARWGVRDVIIMGDFNAGCSYVSTSEWKQIRLATDTRFYWLFTNGM

DTTVGRTDCPYDRMVVAGSVMIRGVLPKTAKAFRYDKAYGLTRDQSEDVSDHWPIEIQLK

DSEYKEEEDFVLEPITLTLQDKRLSKLAKRAIYTLRSKSNPLLLLGYELTSLYKKSGALA

VITLQRRVSSVAEAIQTVQAMRNNFPGFVSNTQVAVARRKIAGLLKLEDPSCRVVQSRFG

YQVLSAACSRQKRRALRGVELVCSLLTFTCELRVTAR*

>TRINITY_DN5554_c0_g1_i2.p1

EGRVCFTVREPAVVCYESISICADLLSIQQKMDVEYSIGVNNRFATLISDDEDAEDVQAK

EKDLKKEKVKKADKKVAKPVVKDSKPAGKKDLTNEETKRDERSERRGGPKGRSDVRRENE

KNTRITNGRDDSNRDKRGGGGFGRRRDDAPSSDADSPGKEGGDRERGGFGSRGRGGGRGG

GRGSRGGFGRGGGPGRKREFERRSGSDRSAPEPSSGGGIRRSIKPQDKRDGGGQYNWGNP

AESNEEEKIEGQEWPETAPDSEEHKITNGEEGAGEEEKEEPEKAEVFMSLDEWKKIQEES

RVKMEYRVRKAGEGEKKGQWKNTSVLKKEESEDLVPSRRVIEEKIKTSGRIKQTVDIDFK

FLPGESRISEPRRGRGGGSRGRGGDRGRGGDRGRGGDRGRGERRGRGAPGGRGGFGGRGH

GGGFGKAAPGQDDATNFDFNAEEFPSLG*

>TRINITY_DN56331_c0_g1_i1.p1

MSSLMFVLIVCASLLHAHAAPESGVLREKRDYDTEYDEPFVFECSQSSDCEGPANVISYI

RSIHSNDREDRIFDFDCHPSSSIDKNQCVWTDFSDWDATINFVCPYVGGIVAITSHHSND

REDRRFSVKCCSLKLGVNMECGYYPHDDYINDYDQEFTLSIPSEAHITGIYSIHNNDRED

RRFKFDVCQQA*

>TRINITY_DN570_c0_g4_i1.p1

MAGQTSHRLLVACVLGILLFEPAICQECDKVIDLGFIIDASGSIADSARKDGKPRTAYFR

SMLDFVNAVISDFKVGPDDTHVGAVLFSEGVLSTVPLTTDAAEIKEKIDGFIDRGPGGGT

RTGEAMQEMRTVVFTGSGDRPENPNVIVTITDGKSSDSDLLREQVRLFKAVPDTKLMALG

VGRDFDINELRMMASSSELVRTVDFNAIGSIEKAIARAACEEQQLPPPAEVYGPPGERGE

AGPQGTGGLPGPQGSPGGRGLAGRAGEPGRRGPNGPAGFPGPDGPPGTLFTNTFPGEKGP

VIRPLIQYASQALTQGSVGSRGNPGRRGVDGTPGLAGPPGPPGDRGIEGPVGLMGAIGVP

GMPGTDGGSGPAGKAGVLGPPGPPGPPGDTGIAGTPGSRGERGREGQPGVSGNGGEDGDM

GPAGPAGPPGRDGSNGGEGPMGSEGTRGAPGSEGPAGQPGETGSPGETGRTGVTGAPGAP

GASGAKGQPGLAGASGERG

>TRINITY_DN5715_c0_g1_i10.p1

MRFLHLVFGAAVCALLGLTDGTVTVLNPKDKVNYGQSLYKSLCTVDGGESFRAWKLPDGS

LLTTTDTSKRLHVESSGTQHFLVIRNVVVEDGGQYECLGTQGSAPMLIQIPFNIQPDSDQ

EIHVDREATIHLAAHGYPQPSVTWKKDGVDVTYSSRIKLLKDGSIQFSPVKADDNGTYTY

TVSQFQGTNIKTGTIKVKVFDEAKITQKPNPASRSLTEGYNTTFHIKATGFPKPEITWWD

ETSKKQLDPFYQEHFIFSPEGSWTIIGIKTSDKGRYSCRATNDAGNDITYVEITYVNVAA

KIASSVADVEKPVGEKAELTCSTEKGDPTPTVRWLQNNQPYISQKFNSVKSVSVITFDKV

RLIDAGEFVCEARNRAVNEKGDQIVVRKAVRLNVVSKPVFNEKAAANVVYSFVGNSVPVT

VRCVFLGYPAPDVKLNAPNGTVLARGNYSVSIKVTTGSPSDFANFTCEASNTLGSDTTGV

QLKQAVAPSVPRNVLYEKTCKKITLKWTVPASDGGMPLIGYVISSDLKTEEVPATDDNME

HELAGEFKPDTPHNIKIFARSSADQGKSVVTSVRTNKYCVPSKPVITNKVTKVETNELTL

KWEAPAYDGGDPQITYTVEWIETSDGSGKPKVKEGIKELEVKLTDLKYDTDHVIKLYAVN

QQGPSKPTIKQFKVKPKSVLPQCPEETKDGVHWSSTVQGSADAKPCPAPANGNAQRSCLQ

MDGGQHAVWGATNFVNCTTKQFVELEKEVKALVDGVQANRSASEILDILVNMTAPVQSSH

SEAGELYGGDLKLSVTILARLSEFNSGKGNGSLSDQQSQAKFILSASNLLGENNAKSWLQ

LDKEGNVSATLLVSTLDEFGASVAETLDSEGNNSYSVIEKPNIIMRLDKVGGKNRIKTEG

LHFTRGNNKISLPPEVFRPNDSSRVASFIYLTLDSFLAFERPGGQKSVFADSTIVSSTVR

PIPPNKLGSPVRINLEKKERQLPPNTTPQRSCVFWRVGLPKAWRTDGCRLVPSSSNDVIA

CECDQLTMFACLMDPHGTDIARALEFISLVGCSISTLAVLLTVSVTLFLWKYLKKPRTQT

EVALNVCVAIGATCILVIIEQWARDHQTGCTVVAVLLHYFLLAMFCWMLCEGILLYIAVM

KMTVGGVQNTPKYFYAIGWGTPAIIVAVSLGATQTSGYGTAKMCWLSTDSEGLIWAVITP

AAAVILVNTVIFVLVHRQRTSTKAFQYQDQVTRIRSSMRASAVMLPLLGITWAFGVLSFN

RDTLVFKYVFTVLNSLQGLMIFI

>TRINITY_DN59303_c0_g1_i1.p1

MKPSGYLAFFALLLSATLHLVCPENKDVNVVYNISVKTCSGWGAGTDADVFIQIFGANKQ

TDEYELTKSGNSFESGSTDDFHILAKYVGLIKKIGIKRNTKGLFDDWKLCEILVDNVVNP

IHQRFAFNSWIPANEWEYSHGKYNVARR*

>TRINITY_DN5980_c0_g1_i1.p1

RVRYLPKDFQQLYQVDKVTFFYLYDQVKNDYLKHTSDKADQDTAFRLGVLEMRRYFKDMP

QMALDKKANFEYIEKEVGLTKFIPKSVLEEMKSKALRKTIHSYFKQYSTLSEEECCFKFF

EILCKIERFDLETFKCSLGTSWTIAVDVVIGPNDGISYKAEQGSIITQMADFSQITSISV

RRMPLVSTGTQTDKQKATVSLKVAGAVEPLVFTTSSIAKSEEMADLIDNYCMIIGGNKQS

ILFKRVDPERSLPSIPSSKRSSLPEPPSPSALIKNLTSSSAKDVHMKRSSRASLDAPPTR

QNGEFDDYAEILDEEDDYAHPMAAKDYQIPRNRIELETIIGQGQFGDVHRGTFKSHDEPV

LQVAIKTCKSTDSKSKFLEEAHNMKQFDHPHIIKLIGVCFEDNGYIIMELAVHGEMRSYL

QKNRFNITLDILLSYIFQLSTAMSYLESKNFCHRDIAARNVLVCSPKCVKLADFGLSRWV

DQEAYYKASKGKLPIKWMAPESINFRRFTTASDTWMFGVCMWEILMYGVKPFQGVKNNDV

IGKIENGERLALPPNCPPALYLLMTECWSYEPQKRPTFQDIKTQLSVIVQEERLHQEDRV

RRESRRLHSFHGTGDGIAPPKPSRPALKYPVVSAQSSASSTHDSSTGLMSPRGLAFQQPQ

SEQPASPNRPRSPQSPNSRTGSLPRNFKSYHEDSGVEPLIGEHPSRYSVSMGGNYTLPKN

YKSPATSPTSKSPVDMSLTMDEELIRREAQQRAEQARLEGAMLSRKLRQQRLQSESDSKW

LALEEQKIELPRTSLSSPGSPPSGAPAITLLSPLSPDDGVVESYNPRGSANFVEQKQPER

EHHPTAVRPASHHATIGDAQSKPKTAPANEPDRSQDVVFMLTTRVVQSVIDLNSGLPFAR

ADDYPEFVKSIGLALRGLLAQVDGEILSLTSSTHKEIEMAHQVLSSDMAELISAMKLAQK

YSTTTLDQEHRRAMLGAAHVLAVDAKHLFDVVDAARKRGSSS*

>TRINITY_DN598_c0_g1_i2.p1

FFFSHNWHRGTQWDDKMEMFKTVFFILFLARLAENLPLDNKNHSATSRLRQRRLVANPFA

LDPTPACYLQFFSGSTPPQGLPYTEDNIRYICQKLPSDSTNYYATLFDQEAGNAVFSAYT

VTATQARGIGTFVRTDVSQSWRTEPGLKHQGTNEMYAGHGTGPEAIHKGHLNPVHVNSFA

KPNMRATFTYTNAVPQYAVFNSGQWATYEQRIAEYVEDKCAQRPSAVMYLLTGVSAFRLQ

VGAQVPTQDPSAPQVQQTPREYVFVVPFPFHQRVHYFPNDVDEHIVRPNSMWTAGCCIWG

GVEAESLAVMGNNDYDKAKIEMTSLLLKELETLLTAAGEPANLFPATPKCRVNSIRV*

>TRINITY_DN60864_c0_g1_i1.p1

LTGLLLALIACQCLAIRPDDCPVKECPEECPKLANCTEGPAYDYRFCECCPVCAKVEGEV

CGGRFHEEGTCAKGLFCTTDSKGVSTCQKRRCPPAPAKLVGCTLLPNTCNDDSDCDDETH

CCFDGCRRRCRDPSEKFNSNHFGKPKPGKCPALPK

>TRINITY_DN6241_c0_g2_i2.p1

MADLSKTGVRLSPPWFTLQKKFANTFGCDPAVTVKPLDTSKEPNHVLPIIVDDENKGKAL

GTIIRANFPFGNVNVATVVQNSKGREWMPENITSAEELKKVLTAAFTGNPLLVEAKARVG

PFPNLQQIGLIMTKTVVQFFNDDLSDFY

>TRINITY_DN629_c0_g1_i4.p1

MALVAVWSASVILLFVSLCSAGVMAQGGPYTPGARGDAVVAQVVQMIQSTGIFPDDKKFL

CRVAWVESKYGNARGTYRPGYYGGIWQVDRVGYQDTVDLPSMRKYHRALQDKLDIDWTQT

SWEDLTKPLYSGIAARLFLVKIPAPIPPDVPGQAAYWKRYYNTAAGKGTVEKFIQDVKHA

TGCAK*

>TRINITY_DN6561_c2_g1_i4.p1

MFVTSPLCCPSRSSILSGRYVHNHLARNNSITGNCSSLDWQKGPEQHTFNTYVKNNGYRT

FYGGKYLNQYGTKNAGGPGHVPPGWDTWYGLVGNSKYYDYTLSVNGVPQRHHADYKEDYL

TDVLKRHAVEFIKEQKPDTPPFFMMVATPACHAPFTPAPQYNSSFNNTKAPRTASFNTAG

GLTKHWLIRNAPHPMAASSIQSSDQIFANRWRTLLSVDDLVSDVVTALNDGKHLENTYII

FSSDNGFHLGQFSLPQDKRQLYEFDIRVPFMIRGPGIPVNKTSKSPILNIDIGPTIIELS

GAKAPDFMDGRSIVPLLKPKAENNRAAESESGTTWRTDFLVQHYGEGEPGKQPGCPKLGS

GVACCWPNCVCEDAWNNTYSCLRTLSSSANTMYCEFADKEAFVEFYDLKKDPDQLDNVAK

KTSQSVLVAQHKRLGELLFCSGKSCIEQSDGEVVV*

>TRINITY_DN656_c0_g1_i1.p1

MHPIASGTITLLCIFVGLTLCADDFDPRQDLVVADCDMAPNRQPPEGLAPKVRGTIRILQ

AAAGGRTHFVVDLKNVGPPHKLHGFHIHESGDIESQGCQSTGSHYNPFGYSHAGPQDKKR

HVGDLGNLETDADGNIKAEFDDTQVSLVGPIAVNGRSFVIHAKKDDLGRGTGAAREESLK

TGNAGARVGCCTIYLVSPDKQ*

>TRINITY_DN66999_c0_g1_i1.p1

AMKMYKYLIGGSHRPIVKRQLNRPYDVTFVIDSSSSISSSDFRKGNLALQYLMDRFKPDT

HYAIATIATRAKIHSKFASKEEAGRVLRRLRRSGGKTNTQEALALCGDLYRGTNDSGVRS

DSRRRILVVTDGRSNIKRRQTLPNAARLKLMRVEVFVVAVGEYLEGMAEIVGMASSTDAH

LYRVANVDGLLKVVNLVPTVDRPWLHEIFG*

>TRINITY_DN67248_c0_g1_i2.p1

LIVRTSDVWVDVQDAPKIGVLPQDVTVSVGENITLNCIATGIPTPDVVWKKDGAEVPQVK

GAGSSVVSIVSTTADDTGNYTCEAANGVNGPDGNEIVATVDIQIDVIDAPKIVSPPAGNV

SLSAGESYVLNCTATGIPPPLIVWEKDGEEVPQTRGDGNSVVTIQNASTEDIGRYKC

>TRINITY_DN687_c1_g1_i3.p2

MSNVTNADVQKKCPAFIGGGCPYSALPLEKKGIAGKCPAFAKGTCPFAECKSVGEFQDKL

SQMRDQCKGDGAYQEFLKAVMLTSQQKEAALGRDCPFFVKQGCPFAHGKDILSPYN

>TRINITY_DN6883_c1_g1_i2.p1

ALDETEPEVTKVSEAGDLLMQKVHEESADRPLISGKVKDVSDKYGDLRDKLQARQAELQE

EIDKSKEFNDKVDELGAWLDSARDKLATQGPISTDPAAVAKQLEEIQDLKKELDDHKPTL

ESAQDLCAWLSDKNKDEPLIVANIKDKLDKVESPYDDVRTKLVELEGKLQAAQMRTQEFQ

VSFDEFKDSLGDMEEMAAKQEPVSAVCDTVKEQKKDDEELSDKIRQHEPVFEQLMKHGQN

LLESTEPGAEREELENRLSDVKTRWDEVKQKAADHMDLVNSTVPEAEKYQEAADSLGPWL

PETENALSSLEPVAADEDSIAARKAAVKALRDDIERHRADRNAVEEKSNAVTALAQADQE

TVEKEAQELNERYDKLDASCAGKQEEVENVVNALEQYQATRQPVDQMLDKAEAVLASLGP

VGGDVAKNKEELDKLKELQENLKAAQDDVNSVNDCGDKVTNSVLAAAGDPSPLQEETAAV

NEKYKDLQEKLKDRQDELEKALERGSQLQDTLDGIKMWTAENLEALESLAPVSTDPDTAK

KQLDEAQGIEDGIDKHKRDLDGAKATVQEIVEACDDPVLESELNNQLEATASPLEELGEK

LNERKDKLQEVIAQSGEFETDLDEFQRWLTKMEQTEAAQRPVSADADTVKNQKDTHEPIQ

QEIKEKEPAYQALLDAGEKLKESSQLPADKKNVEEKLANITQHWNDLNTKSRDRTDALDK

AVELTSQYQDLRGDLLPWLEGAEKRLGEMPLSCEPEVLKSNKENLEELQKEVEDHVPSHE

ELNKTAAGISDVCADDVGVVEDEIQDENKRWDELRKNLPETASKIDELLNNLEQYRDKSS

STDDQIADIEKDADSERPLVSDVDEVKAQVEELKALLGKLEDLKPDVDSAVALGQDLCEK

NPDVDTTPVSQQNEALPAHYDAVKDKLAEKLEKTEGILAGLQEYWDKEKELEKEVKDVGE

GLDQNKPREMDLEKIKEQLENTKALKALLDDNRPVFDEVNKRAQDLIGEGLGFDSAMVKQ

IADTDKEWNDVNDAAANQVKELEKVLEQLENLDEAVKEVDEAISAEEAKLNELPPVGTDV

GTINEQIEQVKDLQNEIDKLQEKMAELNDMKYKLHIANPNADTSAVDKAVDDLNQRLLAA

SHQLSDRQSKLEQALMQCGQFRDAMKSLLEWLADTRDEMDSQDPVAAADPKVLKAQLQEQ

KLFAKMVADRQPAVESLQDTGREILKTADGDSKADIEVGLADINSQWTQLNEMLEARKKE

LEDAMAAAQRFYDLHKEVTKDIENTDSRLKSEEFEVKAKPDEIAEQFDKLKDVCKEADDH

EPAVRETLKAGDELLQHCTEEDADVVRGKVNKLKDQYRDQLRLSKDMRKKYAEASELSSG

FFGANEELTKWLEETEAKLADAQKEGQEAEEQQEKLKDIQQAIAAKEPEIKSFNNTGAKL

LKLLPDDEKPKVEEPLEDVNKKWEGLRADVDQLAKELFSAQEQVQKFHLRLDEVKDWLTQ

KEEQLAAQEAVGVEPEKVKEQLADQTNLNSDVAAHKKTVSSICDTGESLLIALTEDEQHA

LKEELGNVKQRYQEVSDQTSARQAQLVEALLLSQQFRDIHKEVVTLLNRCEDNFQKLEDE

SQPAEVQQEIIKSIQESIAALKNLIGHLEETGNDLIKLSGPGEPADSVKEKLDSCRERYD

KLQWQTEERGIKIGMTLQQEEQIQHKLDELLSALEKRKEDFNNLEPISVRPEKISEQIEA

QKALQEDFNPEKESVEELSKAVEALVAARPDAKTSQLIKDKMAKVSTLSTDVQTDYDERL

KALEKALEAGQVFWSGLEELKHILKEIQDHMDVQDPPALDPEDMAEQKAESQELHSELEA

HEECLSSLREATPILVAHCSPSEKLLVENELAQITQQWDEIQKTWKKRDVGLQEVEETAK

QYSELYEPLMAWLTDMEEKLGHEPAVGTELDVVKDQLQQQKAFQKELAPHQTEVTAVNQK

GMVLSELCRPEDSDLLAAQLDDVNTRWDALHDLSNERQHKLEEALLALGQFQLALEELLV

WIKQTNATLDEQLEKEVQGDVKFIEVELAKHKILQNDILAHETSVESVSEAAKKLLDSGD

SKMESGALQGKVTELDDGWQEILAKSAQREAKLNDALDKSHGVMSEMKELRAWLNEANDF

LFSRRPVGGIPATAKKQLDKHKDFMAVINSRKESYHSVVEIVQDMIQSSDPTTAASLQHS

LNDMKTTWQGVMDKSADEGQKLQQALENAEQLDKNMTDMDSWLTQLEGTVAEFGPVSTIL

INLNQQRDQYQELKADIDAHREPFKEMKNLSYKITHVCIEEDGRIIGDAITALESRWKEV

LGQCSARKKLLDENFKLSQKFYNGVDDLLKMLDDSEQSLKSEEPIGVDPAHLRAQLKKHK

EFQQMLGSHQAAMDATIKAGKVLMDKSEDNDAVMIEGKIADLKARWDAVCGLSVERQQKL

EEALLFSGMFQEALQSLLDWLAVVEPSLSTETAVMGDSETVQILIDNHNTFQRELGRRQA

NYDSVMQAGRAMIDENKVEDPSQLEERLADLRMRWEAVCAMATTKQDRLENALDLAKDFD

TGVRTELAVLKEFEDTLRGLGPISEDLDGVAAQLDEQKVLHNDLLAEEANVAAAIKKGQV

ILRFCHPSAVQIVQQWLARLKKRWEDVSKWSNQRLTRLEEENKKMLEEEQLMEELLKWIV

VKEDALQEKEKEPIPEEDYEEVKRLLEEHKVYQEDMSKKQPVYDRLTKSSKRRNGQGSPA

PHSTPEPRGGRRGSSKIPKLSSPSSSFARERSREKLLSASPSSGYTREKERTPSFTRSGS

YTRDRHPGVAHLSKRWQRLWLMSMERLRRLQERLEHLAIKRASEKFDFNEWRTRFQKWLR

DSKSRVQDIFRRMDHDRDGKLTREQFITGILNTNFPTERWEMELVASLFSRDGLIDYKDF

INRLKNKPSSKKPEKPKTEAEQILSEVEKQCGQCKCCKKFAFFKVAENKYRFGDSQKLRL

IRIMRTTVMVRVGGGWEKLEEFLGKNDPCRAEGRTNLELREQLTRPVGAVQSMAAFKSKR

PLTAREGSDVSKPSISRERSGGSLRPGVAAKPPAIPKPKTRLGDVVSSGYGISRERSSEF

RSPRSRNGHSSSSSKVKRTGSQTSIGSGGSTEDLAEGGASPRGSTRALSSSPSAKKGPRS

GSSENLRSSVERLHSTTKAAGAMSSAASKKKTTRPGAASPRTGSSENLRSSVEKLHTTTK

AAGALSSAASAKKTTRQSATSPRAGSSENLRASVEKLHTTTKVAGAISKKPYTSPYAAPR

RKAAAEKEEKTPAEKKPPAETKTEKK*

>TRINITY_DN70518_c0_g1_i1.p1

AVKLQEGSELANSPRIDSAARVLEVVIAQPNQSLGELNFNASSKLEVQENVGSVGLGVTR

TGSLLGQVGFRYVVKPVTSGPYMPTDDSDYSPRDGQLMFQDGEGYKTLRINITDDQTAEL

DEAFVVQMSRPLGGVRIGQHQAVEVAISANDDPYGLFGFQTTDPQVVQEGGSLQLQVDRA

GGSFGEVHVTWRVTYAPSSQIQNPDQ

>TRINITY_DN7071_c1_g4_i1.p1

MAGFCGVVSALLFVSAITVSPSDALEPVCKPEKSSIYAPKLPQLPNAFTTSIEVNIANRN

YSIFYTEYYDLHGNRGALHRTRNGQTTKTIYDYNYDEIVEINDAMAKCVVEHIGKLRRRC

RHSFFGGNRSHIESVADLFHFGASWNESYMGVKEVRGIKCFHWRACVVPSEFTSYTLDYY

FSVTNWKPNGTLVRAEINGTAQNMKCTNGTYSPINGTHSFFHVYDFINFKAGAPDSEVFQ

PPRGLFCEGYRSANRSKPKLPPAFSVRLESVETRNKTVQEWKEVYDFDLKLFMVNYQDRW

NPQKGQVNLIYDLNSGTGYNITMRTSKCKIFPIMSNNSFATTEDSHHHLRMKDAQELFFG

VNGSSPTYLGSSYVRGIEVDIWSFKRYARKWNVTYITEVSFSKPTWDMRAGNLVHQHQVP

VQYNAYRSRGTWRGNIFNFDGESVTLSTFDVRPCFGKNERLFVYFRLKADYDKFGKDQRF

IRKFALTIATTANVSTLRVSGFQLLPAQDGISANFLLLDKPTQHSDIMQHVRPENDLREA

ADDLRRSVKSGKFQVRYDDAGSFSAIPDSYFSYNWPLVPWTNQPTNQPTNPSGKPGPGRP

SKARSSGVAKGAVAGVAFVMLAVGLVVGLGIAHVIMKRRGTGLFNYQRQA*

>TRINITY_DN724_c0_g1_i5.p2

MAEVATPEVQLDSTTPKEAGKDNASEKTIKELKEDVQAKESENGDAKVENGDSTNGKHEE

KSAENGDTRGEDKDEPSEGKESEEEAEEKPDLKRKGENETAEVLCRNFVSTATLANEFSV

PVCLSKLSFVCLKVKYATQNHACLQKKEVPK*

>TRINITY_DN72628_c0_g1_i1.p1

NDVDIEINVVDVNDNKPIFTMPDLFGRVNSNARPGTSAYQLRATDEDDGLNGRVGYQLVT

RNSVFAINPFRQTVETGNLLENDGSYKVELFAFDYGIPHQKSDTVSVEIKTVKFPPRFSR

NLYRFNVSETAFTGTLVGQVNATSASGARLWFSIVQ

>TRINITY_DN7547_c0_g1_i1.p1

PLSYSIASGGAGIFEIDPNSGVISLAKRMPSGSQIQYTLQVRAQDPGSKYQEVRLIVEVE

DSNNNAPVFTSCQTATVSENLPGGKRVTKVVAEDKNDRGKNREIEYSLKHGGERLFRIDN

TTGEIFTTSSLDREVDKSYSLIVQAEDGGYGRNEAERLLNYCFLDVKVGDKNDNYPEFLS

REYLGSVYYRSPVGTTILTVSATDADDDTNSQVEYSLVGPNGYFEITTEGVVKTKARLQK

DLPVTRLTVRAKNRKAMETRDQETRNSKTTVEISITEKQPPTCSKDLFVFNIPEDKPVNN

EVGNVSATSNTGSKSIAYSLVKDNPDVDQAFQVRPDGNIRTGTQLNYERKKQYTLQIRAK

ETDNNLYSTCVARVTLDDVNDEAPNFQLEQYYARVPENANVGFEVVKIKATDKDKDGTAK

VTYSIDKTGDQFGDDYKSFDINSDSGVITTKAKFDREQKRQYDLLVIASDGKTAPKVHVQ

IAVVDVNDEAPVFNPQEFDAEISEDAPIGASIRSLSAKDGDIGENARLDYFLSAGTGLQK

FKMETVYGKQNYGVLELAAPLDYEDTTEYTLYVTATDRKDSSRAKVTIKVLDANDNTPEF

TTLMYEATVPEESEPGVSVVTVTASDRDVSTKDKLKYSLDARGSKYFKINANTGQIETWD

GKLDRELSPYFMFSVYAFDGKHRGEAEVRVKLSDINDNAPLFPSPPYVGYVFEHKPAGTS

VMVVEALDKDEGGNSNSALEYVLIDNPGDRFAIDYKGLITTKKELNRETTPNEFTVTVKA

TDRGTPRKSGTTKAKIIVDDVNDHKPVFTKEEYRGSVREDALPGFSVMEVSATDKDAGIN

AELEFSIKSGNDPSAFYLDPRTGKIYVSGRLDFDKGKRSYRMIVIVRDRGMEPLEADKPA

TVIITIGDANDNPPKFVPATYSLRVAEDIKVGATLLKVTAVDQDSGSFSAFNFSINKGDD

ADIFGIKPDPKNASIGLIYTFLDLDRETTVLHNLTVVATDLAGLSGTATVYLTVTDVNDN

GPWFVPPYFEAEIKENTNTKQFVTTVNATDPDESENGPPFSFSIVNVTSKFSIARKTDMT

AEIFSSGSFDREVKPRWTLKVRGTDSGSPKKANETFVFIKIGDVNDNEPFDGSLNIIVNA

YRGEFAGGVIGKAYYKDEDSDGDVNTYKITSQSDSYFSVDSSSGEITAKEGLPVGSHSLV

VEVTEQNRRSGSNTGKTVRSNIKVFVRAVPDAAVRRSVAVQFLHVRKVSFFVGDFYGKVL

GALAQIFGVSANQVLIFSIQKAPLRHLPSGALTAVEVQLAVQIVDEVYMGFLDVVKTLVQ

QENRLIALGLDVGDIGIDECAREYQDVGKCTNVVRTSSKFTVASGDYGKIPAPGSSLTIV

SMDVILKGEYSAIFPPIYNCTTNNPCLHGGTCHNAVPRGTVICECPRGFRGPRCEFTTRT

FFGNSYIWLAALTAYERSEVSMSFVTRQANGLLLYQGPLYKGANNGLEDFMAVMMVGGYI

QLKMTLGPHPSAPLVMYMDRGNRLNDGNWHIVQVSRQLKVVKIIIDRCEKAQVVEENGRV

FEDRRMCEMEADVWGSSVYLNGFGPLQIGGVQNEVAGLSLQYSGFTGCIRDIYDNGNMYD

LNDPVKVENAPKGCEFANPCPDCPKERGYCEPRLNGGSICVCDLGYTGTSCSGRSEANWY

KPGSFSQYKVKQSRRRRRELVSPPVPLLNGFYSNIALQVKIEPTPNDMVIFLASNSLGTE

FNRIDVQNGVLRYVFRLGDRMKILKIPEYNVSDGKYHNVTVKREGNIATVQIDYEAKVVG

TTGGIHKLLNMGGGSFFAGGMPNITEVRIVDAWVKSGGNAILFGADGSVVSSGLGAGSAG

TLSGGSFFGTMIKLGIFGQIYTESYSTSKHVSLQGVVAVSTTGFSSSSSSSSSSSSSVTI

IRGSSSTGSALGTTGHVWVVLWDDDPAGHLWTNLHRELLHKQARQPAGRRGRKHHRV*

>TRINITY_DN75568_c0_g1_i1.p1

TGDAGAPGNPGFPGLKGDAGPPGETGAVGVTGPPGPDGDEGSQGDAGPPGFQIPGPVGRP

GDPGDQGLQGVAGQDFFDGDKGATGELGPEGPPGPQGSEGPGGKQGPPGEAGAVGQKGDV

GLDGIPGFVGITGNTGPPGPSGNPGPKGVKGTTGEEGAMGQPGDSIAGPPGEQGGFGMPG

DPGDSGPQGAKGDPGEPGPPGPSPIGEQGLRGLPGPKGDQGPPGELVGGEPLIPGPPGDP

GDEGLLGMPGIKGERGSAGLPGEAGGSGTQGPPGERGDVGTPGPAGEEGGQGDPGETGAN

GFDGDPGLGGALGAPGETGAAGASGSPGPRGDPGDAGAEGQRGPKGPDGDQGPPGESG

>TRINITY_DN7634_c0_g2_i4.p1

LGFSKTNSGMKDMDVVVGGKENDKDYVHDLWSTAKVRPPKDAQADYNLTNAKEENGKTKL

MFERKRSTGDDKDLEFKANESVYLAFAFHNTQDGMDVTTFPMHDERGYFDKQYNLLLQAT

PSPTGPNATVVTSTPTGTAGTPTQAPTSGQERPAMSLLNVALSALFLAIFL*

>TRINITY_DN800_c0_g1_i7.p1

MIFSSAQAARDFANRLNDLFLSGTGAQDERPFGTAVLDGIDLDIEGGSNAYYSEFVTELR

MLMDQDTSKPYLLTGAPQCPFPDHYLGPVLESDGDKFDQVYVQFYNNPPCMYSASVGGFN

KALDQWLNLGNSNGFG

>TRINITY_DN8071_c0_g1_i3.p1

EKMAIIITDGAQTDYPGLETDPLIEVAGRLQNRGVKIVSVGVGREVDPIQLLEMTGGDGD

LVFRATGFEDLKETLDDIIKTACPVDGQWSPWSPWTECTASCAGGLQRRNRTCNNPPPSG

GGANCTGPAEETQACNEDPCPIDGNWGEWNPWQDCSADCGGGVRTRFRICDNPPPSNGGA

RCVGISEDIENCNEDPCPIDGGWSPWKPWEACSVTCGGGEQKRTRACDSPEPQNGGAPCD

GPAEETQ

>TRINITY_DN8235_c0_g1_i1.p1

MSAGINMSKVKSKLATIKDKTEAEEDRKKNAEDLLREEEDKLHKNEEEIESFKRRIQLVL

EHIERAEKAYEVSAAKLDETKLKFQTEEEMRTDLESTDRDNDDEITKLEAQIVEENERLE

ESQNKLDEVLQKLKVVETDLQKAVERGNKLETKADNLENEATTKGESIRDLEERDAEAAE

KEQDSEEKILFFQGLLDEANQRVEDAERKVPPIELYMFELINETNDLAKKKEEMQEEMKS

MAEFADSDDDDDLVESNRANPAKKPEAKPEPEPEPEKTEDPEDEASEDED*

>TRINITY_DN8307_c0_g2_i1.p1

RNEALALEEDVMRAINVTGDIIKFVQEVAEALRQGEANQSSLIQRAEQILNKLSEVDFGP

ANVLVSDERDLVFLALNGSRSNLNDALQLWDLIRAANRTLRLLEARLGQILHKSAVAWAR

AIEAAGINSASRRFDSETPMRIAQELHAALNVSLNHVREVLLAARDSLNSSAVHYQKFEG

NFATLD

>TRINITY_DN8347_c0_g1_i4.p1

MPMARTRDRGIIWLCAAAFLVSMLPSSAVAEGGGEAEIDEEAKLTIECNKNYISVSFSLE

DYPKADTSTAHLANEACKPAVATNETVGFKFGLEDCGTQRSVSDDGKYVIYENKINVEMK

TLTPEDQTISRSHSVVFPFKCSYDKKALVTSGARDVDEIGEKPEVIGKIAFNPRSTEIIT

EAAGYGNFTYYMDMFKSDQYSEKEEYPAVKAIGQTLYLELKVESSDSKLQLFPDWCKATL

SADYSSDPSHMIMENTCSRDNTLEYNYQPGAVQRFSLVAFRFIESYDDVYLHCQVTVCRE

QDTESRCAKGCNEASDNSRKRRAAADQLAQTLYLGPIKLASQNKVGAPAVSSTSGVSTAT

LVAVIAGLLALLVLILIVGLVVLVRRRRGPYTGAFLIQEE*

>TRINITY_DN846_c0_g1_i1.p1

MADAAQGCDDLCGEQNKVCVPEGFQGEDVKQLFEDLGQTCKTEEAYWASDQPCYAFSREH

CYGTTELPDEIDCATGGNPAVKRLCPCDCEGGYFMADPAESCDSQCEKRGMVCAPEGFKG

KDVKQLFESLGKTCKTEESYWASDQPCYAFSREHCYGTTELPDEIDCATGGNPAVKRLCP

CDCEGGYFMADPAESCDSQCEKRGMVCAPEGFKGKDVKQLFESLGKTCKTEESYWASDQP

CYAFSREHCYGTTELPDEIDCATGGNPAVQRLCPCTCQ*

>TRINITY_DN8848_c0_g1_i1.p1

MSDKVEIRKKIASVALSKVGSTHWSYESPSGHGPNTYKCNYFVYDVGNEAGAKMPTGPTF

PGPIGAGEGGWGDSAAKLPNWSVVQSPQKGDVIGAHNENDVYHVGIYVGDDKTVSANPKN

VGHNSWPFGSGRYEGLDPVYRRYNPK*

>TRINITY_DN910_c0_g1_i2.p1

DGRRIYETTKLSHGKVVKFGRSHVFRFSDPAFDQRAKPQAPSISDRGSDQASISSMSDTD

LQKKGRPREYEAPDDVDMESGEAGVFETTFDVTGEIKTNTTFPEREKQLPQVQQNLQAMH

SFEDLQQDNADGDKLPARLEFREVGEDAFFAVVISEVNGAAVHFKLSPTYTLYMCCRYRM

SPAYRPDLSSDQRGERLGVTLVKIGNIVRSTVRENSQMPASLAFWIANSSELLHFLKEDR

DIALHTRDGQQILTSSIQMAFRSLVHCVQQELKSFMSAFLDETDDADMADMDFDSMSDPD

SPDHGMTANERSFRFAASGRPLGSEQWLGARRRHPKPTISDVLYTLSSAMSLLRRCRVNA

AITIQVFTHLFHYVNMWIFNKLVLQPQLGLCSRAWGRKLRKRLARVETWAQKQGLELAAD

RHLSRIIQAAHLLQAPKNSHNDINSISSTCFKLNSYQLRALLENYVPSHDEPAIPADLIN

SVVDVAENTADELMRSNGQEVQLEEEPELNLPFLLPEDGYSCDVIRGVPPGLKEFLEPLA

STGLCKLIVQPMASGLWTVYQTIPKDSSGEAPKQASSPDLVEVAFNKGRGGMGLSIVAAK

GAGQDQPGIYVKQVVKDGPAARDGRLQAGDQLVAVNGESLIGVSQERAAELMVKSGANVK

LLVAKQGAIFHGLATLLSQPSPMVTREVTGKLTPVEPESAQLVQASPTVPDDQLQRPPTR

WLQNDGVDVSYKQRSERELRAEEDRRRVEEEEKRRAEEEQQRLEEEHRRAEEDERRREEA

RKLEEERRFADERRKAEEEQRYMEETQRIEDQRHERRGYNGDWRPQVDERWRNEEPMRPT

GQNRFHGEMERPPIKPKPKPKPPQFQESLRNRDRQRSSPAFSFENANRDPGLRASPTTAG

SPRSYSPNGESHQSPEEPTSPLRIDTRETKYGRAISVRPSGLRSPTQTQRPTDLDQFAQS

EGWRRNDQSEFDRWQREERQLAEKREREMEERERLERERREQEERAWREKLDRERALQEE

REKWERERLNRERLERERLEREKQEQEERDRQALQAMMEEQRRQEQLERERREREDREER

ERQEQERIIKQRENQDVRTATAEHTRRLERDQEPARALEQQRWKSSREVLDSIESMNPDE

VEKEFQRRLQEEKRRREGEDANVVQERTAGGLVAVTRVQYHPPDREEQMERERKIQLILE

EREKRERERKENDRRRKIQEEKEERERQERQQRRLHQFEMEREQQREMQKKLQEQREREQ

AEWLRVQKEKREQQRNEQERQRMEHKMREEEERNRKRQELLQKKEQDEALRRLSQQQKEQ

EERRFAEEQRQIEMRREQDRRRQFEEQQLLREKEEQVRRQQVEDERARKLSTEDHVNELK

QRASADYDRRRQLIDDEISRRRDDKPPSVLKNSNSMRTRKQVSFSNVATEIREPSSPTYV

VGNSAGYTARVTPAASVRYVHTRLPADGAPPTERYPPDAEDEEDDLPPPPPPPPPEELLK

DDSFPPPPPPKSSHSLQRFTALGGGERSQGNYYTPHYDPQRNHADGFQIRDPYNNPEVHY

RNVPVSSTGGYPSYITMPRKGRPLSYPAALDAAPAPAPQRYGSQENVLDGPPQGGRPRFQ

PPQAARLDSDDEDLVEHARVSLARVSLTDEEKTRSPAKPEKMDFRDKLKMFNASSPEDRT

RLSKWERSQLAQMNGD*

>TRINITY_DN95494_c0_g1_i1.p2

DSDCSGTKKCCFNGCQRDCLAVGLECPEQCDENAQCVEFVIGGRQCVCNDGYEGDGTQCA

ANPCSGKECPFYGVCRASNGTAQCACPEVCPAIFMPVCGSDGKVYSNQCLMKAEACKRKT

MITVESKR
