# Supplementary material for: Proteomic Profiling of Black Coral (Antipatharia) Skeleton Reveals Hundreds of Skeleton-Associated Proteins Across Two Taxa
Source: Frontiers journal article supplement (doi:10.3389/fmars.2022.904835), 2022-06-30
Supplement: Data_Sheet_3.DOCX [file Data_Sheet_3.DOCX]

2x Clean Only

>TRINITY_DN0_c0_g1_TRINITY_DN0_c0_g1_i19_g.2076

YGHGYGYGHRGYGYGGYGYGKKYYDEDASGKYGYGGYGYGHGYGYGKGYGYGHGYGYGGY

GYGKKYYDEDASGKYGYGGYGYGGYGGYGHGYGYGKGYGYGHGYGYGGYGYGKKYYDED

ASGKYGYGGYGYGGYGYGHGYGGYGHKGYGGYGYGKHYYDEDASPSYHYVYGGYGHGYG

GYGHKGYGGYRGYGHKYYY*

>TRINITY_DN10863_c0_g1_TRINITY_DN10863_c0_g1_i1_g.7231

GGDFKCECNSGYQGDGKSCSDVDECRGQNDCDKNAMCTNTDGSYVCRCIKGYQGDGQTCQ

DINECLSADAKCDSKAECSNTNGSFNCQCIKGYQGNGLTCEDVDECSNGDNNCHSNALC

TNNEGSYICRCIKGFNGDGLTCQDINECEELNNACGSNERCKNNVGSFSCECTEGYART

DGTCQDIDECSIPGSTDCDENADCINTNGSYLCRCKEGFQGDGRSCGDTEARVRCEPEC

DVNAECRNASGSAGRVECVCNEGYEGNGVNCTDYDECSNGDNKCDLNALCTNTEGKYVC

RCISGFVGDGMTCQDVNECEVRNKTCGPNENCTNTAGSFSCECVEGYTRKDGTCQDIDE

CASSDTNKCDANAMCTNTEGSYVCRCVKGFQGDGYMCVDIDECLSGDAKCDANARCTNN

DGFYDCLCNDGYEGDGRTCEDVNECEEANKCGPDKTCTNTAGSFSCQCATGYTGEDGAC

LDAPKIVPPETKSVTLRAGESIRLNCGATGVPLPAVLWKKDGVEIPQLAGDGNSVAVIQ

AASPESSGTYVCEARNGVKDSEGEEIVALMEIPVSVTGCFQECGENAFCRNVSGSFQCE

CITGYQGDGQSCSDVDECSSEDLNECDSNALCTNSDGSYVCRCLKGYQGDGRTCADIDE

CSGQNDCANNSLCTNSEGSYACRCVKGYQGDGKTCTDIDECLSAKNHDCDTNALCTNIE

GSYVCRCVRGYQGDGQNCTDIDECSGEHECSDKALCTNTEGSYVCRCFNGYKGDGRTCE

DIDECSDGHECSPNAVCTNTDSSHVCRCIRGYQGDGKTCEDIDECLPDGANECAPNSLC

TNTNGSYVCRCISGYQGDGRTCEDLDECASDNDCSSSAVCTNTEGSYVCRCARGYRGDG

QTCEDIDECLSGDGNECDANAVCSNTGGSYDCRCNSGYQGDGRTCADVNECLESADCHP

NALCTNTEGSYVCRCKNGFIGDGSSCQDLDECKERNDTCGPNESCVNTVGSFSCRCLVG

YTRQNGTCQDNDECVSDDANECAPNALCTNTEGSYVCRCKSGFQGDGRACVDTDECSSG

VAECDVNAVCTNNDGSYACTCNEGFTGDGRSCAADTCVPDCGDGEHCVRIDGEFQCVCR

SGFEQVGDVCQDVDECRRPDLNKCDVNALCTNTEGAYVCRCISGYHGDGRMCKDVDECT

ERNVTCASNAGCVNTLGSYRCDCKEGYEGDGTLCDDIDECRTGVDECSENALCTNQPGS

YVCRCLSGYRGDGRLCGDIDECFAGQDDCHVMAECENSQGSYSCRCLEGYQGDGRNCTD

VDECDDGSSGCHSNAVCTNSDGSYSCACGVGYTGDGFNCTALPTTEPPTTPDVDECEAG

TAECDENAVCT

>TRINITY_DN10_c0_g1_TRINITY_DN10_c0_g1_i14_g.2793

MASQRLMVSGFPEGTTEAELMMYFQSRKKSGGGDIAKIKMEEGRRAVITFEEEGVAQRVC

SRKFQALRDAKLQVSLNFLQAQNVAERGHSMRDSNQWEPSTPEDPRRSIDARRDSSTAE

EKPEFEELKNEDPRPAETERCLSFLISNFSSATTEGKLRYYFENAKRSGGREIQELKFY

PDEGVAELSFAEVADYERLVGQEHRLEGQTLSIEIQEPEKGLPLDTRNLYVEGLNPQTY

RDCLIYYLEKFSVGVEVESIQFGPAGRALVTFKAPPDFDYMIEKVNSFNKGLEGFHPRA

RRSPVCSSIKVTGLSTQTTEERLILHFESRRNSGGDVHHVDYEEGSDSAIVYFKDVQTV

ERVLKKQDHSLHSKALSLELYHPILEEGPQNRQRSGRTRQTKPQKVLAVDRDIVSFIEE

FHEDELGELLESLEVSMVPDKSADSVVISLSSVGRGNHVQSSWAERAEAITKFLNAFTK

TSIDLGGDLAVEVQKRMHETELLKAENIPEQVHITFSESGGSVQFIGRESYVSEAIRAF

HIVARSVEDDLKLKRSLTQSEDKDIPQDKLQLLEMSGYCLELEKKRKHLKIEVGAANGH

IKFSGPEVEIIEAKTDIFKFLMQTKTLVLEMSERCLRVLFSPQGRSYTQKSFQEGNIVA

TVSPGQRGMKNEAVILGLDDGNARQAESLLQTLYKEFNTPLKDGQLPLTNGQKWKELVS

QVQFQSLVSVNIESNMLWVSGVSSEASRSFQQLRDFLVHNTVLKETISMPKGCSRFLVT

AWRPEVDQITRKNSTTWSPASDREEDGSGGIIISGNAENLTKCVEEIQNLASKIKCDNI

SVDKPGMGKLFSKVSGGHLLRGVEDKNRCTIERIMDVDEPTETPLLESAYGGTDSSCTC

TYVTRHGKKISVYKDDLTKHHVDAIVNAANDRLQHVGGLAAAVVKEGGKEIQEECEDHI

RRRGGSLLDGQVYVSGPGKLPCKQIIHAVGPKWNAKATEGEKTRQENMLAYAITNCLKK

ASSLSSIAIPAVSSGVYGFPLGLCASVIIDAVADFFDENPTCRLSEVHLTNNDDRTVST

FTDKMRKKFGKEESFHEHGAISAETISATNAALPIARRSSATNPKQPLTTAEGVKISVQ

VGDLTNVKADVLVGSCGSTLQLNNNPCARALSQAAGPGLQQECNTKGTVKEGGIAQAGP

HGLQQCKAVYFAVCSSWNGGKGEKVLMDLFRKCLTEAHNSNMASIAFSSIGTGVLGFPP

ATVAKVYFDQAIAFSAKHPRTRLKEIKFVPFDKDINTVSAFTGELSKRASRGLSQTNNT

KGGAQRRWGPNPVFSRVKERASDHLQVNVGPICFQVQAGDITKETTDAIVVVSNPDLDL

KLGGGAGAAILRDGGTFIQMECAAMGQQPPGAVVRTSAGNLNAKFIFHIVPSQKATMKE

TIVKCLQLAETSNIGSISFPAVGTGNLGMEPKDCAELLLTSVETFSQRNPKSLQLVRVV

IFQPDMVDAFRSVMKIKSGEESPSEHWVVRTVKKVASYMPFGSDQKEASQAEMLKSVPA

DIKMSLNVFAGTRLDVDRAIKEIRELMDEHCKQKFIEKDAIMLLTEDHERRIRTAALRH

GTKVEIEKPIGRIVIRGNSDDVLEVTGEIHEILDEIVEDQRKRYQEDLLIKTVEWEYKD

GAKFEKYPKDVNLKIETAHTEGKKKVAFVFDRQQCEIDFGKMEERCPAYRSVVDVRRRD

VKDLAVPAHWAPQPTDSNGKEKEVHLVKLNSNMREYQSVEQHFQSSMQGTSTIISIDRV

QNPGLNVIYETKKAKMDEGKGSNEMKLFHGTAGKNLDKINAYGFNRSYAGAHAVMYGSG

VYFAVQASYSARPTYSPPDGRGLRYMYLAKVLVGEYAVGKQGLIVPPSKNDPNNPTESY

DTAVDQDPNPNIIVTFYDWQCYPEYLITFK*

>TRINITY_DN11354_c0_g1_TRINITY_DN11354_c0_g1_i1_g.98678

MFYNDMRDPLCRDYSRVIIDWAKDENRWRCPGLGVFNSKRMEDSRFEDLKVKLGYPYLYF

HQGNCEHLILFTDMRLLDVDDPQKAKEYPVQVFRHRGRRTKCSLCSIYSARWVTNNDSL

ACMDPCFFCDNCFHSLHYSENGQKLADFQAYPYMGDFTW*

>TRINITY_DN1179_c0_g2_TRINITY_DN1179_c0_g2_i7_g.11447

MRQYCKKTCGWCGVNPTEEPVSPTEGECDDDSEWCDEWAGDGDCEDDEQFMRQYCKKTCG

WCGVNPTEEPVSPTEGECDDDSEWCDEWAGDGDCEDDEQFMRQYCKKSCGWCGDAGGNE

DPCNSHKFLPDAESRLTSAPGAEKCDDDLEIAWYRLSETNPEAKMPERCVKTERCGAHA

TGWLKGKHPSAKQGIVSRTVCFNWEKKSCCDWKVKIQVKNCGAFYVYKLKKAPECYLRY

CIAEPGEPTEKPAVKPTEGEPTEEPAVKPTEEPGSSKCGVRWNEEDKRIVGGTVAASNQ

DWPWQAGLKETRDGEIFCGGSLITDEWVLTAAHCIHDLIKPGDGCATARADEVKVVLGE

FDQRNVDGHEVDKEVSHLCIHSKYDRPNVDYDVALLRFKTPLKEFNATMSPVCLPTSST

DFPRGTKCTVTGFGRKVEGGDLSNRLREVKIPLRTLQYCKNKYREHKVTDRMLCAGDRN

GKDSCQGDSGGPLVCQDEQSDRFILWGVVSWGIGCAQKGNPGLYADVKYFLPWIEATMK

SVH*

>TRINITY_DN1194_c0_g1_TRINITY_DN1194_c0_g1_i7_g.11477

MAAPQTPLVMLVAVFSVLILARSSAAVDQAEENKALDFLQKYNNETRTRKWESSQASWVH

ATNLTEHNARLKTDASLAFSRYLTEKREEAAKFDTSKLSEDTARQIRFIKATATAKDQA

VQKKLTDLEGELEKLYSSAKVKDNDGKLLALNPDLYGILRESRDYERLKFVWQGWRDAS

GRKMRSLYKEFVKLSNQGARDNNWKDTGAWWRSWYEVNDLPKIVEGLYQSLKPLYQELH

AYVRFKLRDTYPQISKEGPIPAHLFGNMWAQTWANIYDLVEPYKNKSSLDVTKTMVKKG

MTVYEMFSLAESFFTSIGLEPLPKQFYNKSMLEKPSDGRKVVCHASAWDFRIEKDGEKD

VRVKQCTNINHDDLVTAHHELGHIQYYLQYWDLPFAYRTGANPGFHEAMGDTLSLSVNT

PQHLKRIGLLESYMADNETDINALMKMALSNVAFLPFGFLIDQWRWRVFSGDITSENYN

AKWWELRTKYQGIVPPVERSEEDFDPGAKYHIPGNTPYIRYFCSYVLQFQFHKAACEAA

SFKGHLHQCSIYQSKEAGKKIGEMLKLGKSKPWPEALEKLTGSTKMDVGPLKEYFDPLY

KWMKEQREEKGYPLGWSVTTSSVGAIVPTLFSVLAAALLGFVRFQ*

>TRINITY_DN11965_c0_g1_TRINITY_DN11965_c0_g1_i1_g.38819

MMKIILLVLVLFVAVDAKGGKCRKKALCQALEELKKQRPFEELKKEIESLKERMTKIEQC

SDKKPGCFCPFLFNGKTYYDCTTDGRTDGRLWCATTSDYDTDHKWKFC*

>TRINITY_DN1322_c0_g1_TRINITY_DN1322_c0_g1_i13_g.114141

MNADPSAAAMRRSEILLQGPNKSILEEHFNGVCVSDKAPPCASLGKIVFHINGTETTVHH

PDPNMSLNEWIRGQPGLKGTKVMCQEGGCGCCVVALNRADPLSKKTVTLAVNSCLFPLC

SVDGCEITTTEGIGNHKDGFHPVQKRLADHNGSQCGYCSPGMVMSMYSFLKENPKPDKE

QIEDIFDGNICRCTGYRPILDAMKSFAADASPIDIEELNKCTGQCNGCPQKKTCTHIPT

GAEPVWYSVASLSELYAIMNKEPEKSVKLVAGNTGKGVYKQEGHFDVIIDISKVQELRH

VKEVDGHLVLGAGLPLNDVIRILGEKADKSATFGAISQHLKKVANTPVRNVGSLAGNLM

LAHAHPDFPSDVLTIMEAAEATLLIGSSSSALTQHSLMDFLKLDMKRKVILGIALPILP

DVIFRTFKITSRAQNTHAYVNAGFGMKLDKATMTVKSPARIVYGGIRTNSIHAAKTEQF

LEGKVLTDPATLKGALALLEEEIQPDADVLVGSSSDYHKNLALSLFYKFYVAALGDEAS

AQIRSAGSSLVRPVSSGTQSYDTKPENYPITQPMTKIAATLQASGEAQYTNDLPSVEGE

VYGALVLSTLANCKIDKIDPSEALKKPGVIKFIGASDLPPGVKNMCPLPFDMDAHHVIE

LFSSGTIYYAGQSVGLIIADTQRHADEAAEAVKVTYRDVQPPILTIAEAIKAKSFHAQI

PILADVNCGNTEAAFASAAHVITGEISCGAQKHFHLETQTAMTVPDEDFLTVYSATQST

DFVQLGISAALGIPEKRIVVVTRRLGGAFGAKATQASVIAAISALAAQMLNRPVRLNVN

FNTNMRTAGNRSPFLAKYKIGVDDAGKLQAIEAEYYADDGYSINDTNLFVAKGHWDNVY

YCPNWKISMTSCFTHTASNTWCRGPGEIQVVFLMESMMEHVAKALNKSPEEVRFVNLYQ

PNQLTPTGIPIPFCNISTLWEDLLKSSEFEKRKAAVEEFNKANRWRKRGLSVVPSKYNI

GSSFAKHTVMVSIYHGDGTVAVTHGGIEMGQGINVKVAQVTARELGIPLEYIAIKEPTT

ITSPNSFVTGGSVGSEVNCKGAMECCKILNDRIAPIRETMPEASWPQLIAACYHKNVDL

SVQHLVVGQPPDKSYAAYGVVCTEVEVDVLTGQREILRSDILYDCGESINPEIDIGQVE

GGFVFGLGYWLTENVFYDPATGRQISDGTWNYTPPSSKDIPADLRISLLKNTPNPVGIL

RSKASGEPPLLMSCSGLFAVKHAVESYRADIGKDQYFPLNGPCTVEETQLSCLVESQHF

TL*

>TRINITY_DN13242_c0_g2_TRINITY_DN13242_c0_g2_i5_g.123590

VCPLKADECSVDSDCGSEAICCFNGCQRECLPSKDKNVVPGKCPKPWRTDPNLCDRRGDM

CQKDAECFLGNKCCFNGCQKDCVKPVLLTECQEKKKEAEMKLQGELPLLGVFIPRCRED

GWYAPEQCHESTGHCWCVNPKGEELPGTRVIRAGSANCTTRVSAGKCPKPTKGHRGFCD

LRGDMCLKDSECAVGEKCCFNGCQNDCVKPGITALVIISVVIVGVVVVIIIITIILSST

IINTTTTTTTTITTIISSEFKVQDGRGRQQRR*

>TRINITY_DN1341_c1_g1_TRINITY_DN1341_c1_g1_i8_g.114604

TTDGHCCVFPFTYSGEVYDKCTDKHSFYDWCATSVEEDGSVGAWDFCEEGEEEEEKDKEE

EIEEEVKEKEEEEEECPVKTADGGCCIFPFTYSGKVYNECTDKHSFSKWCATSVEEDGS

AGAWDYCEDEEQEEELEKEKEEEEEEEKEEEKEEKDKEEKECPMKTANGACCVFPFTYS

GEVYNECTRKHSFLEWCATSVEEDGSA

>TRINITY_DN13467_c0_g1_TRINITY_DN13467_c0_g1_i1_g.33054

DQEAYRATLTAAQALKGSGVLIYTVGVKPTANEDQLTGIASNDDGVFWLPEDELPRHVPW

LFYRLYEYLGTNHWPLHRPGTKCQQQYRDALQRYVFGRFVPRCRPDGRFEPIQCHSSFC

YCVDRDGMEISGSRRPGYSPPKCLADVKPATECQKHYRHANPHYSLGVFVPRCLPNGQY

EGVQCMPGAYCWCVYSSGRHRNNTKSRGWPDCDESERPLTPCQRAYWESHQSRSIGALI

PRCNPDGSYHRVQCHEKTCWCVDKDGKEIDGTRTKLPGLPSCQAPGQLPSRCEKQRAYA

LQKHVVGRWIPRCRLDGSYEPIQCDRGWNCWCVDVTGKEIAQSRTRGWPNCGPPGDQPS

KCLQHTKAALQQFLPGRFVPRCRAGGWYDYVQCAGSVCMCVDRLGMEVPGTSRPRFMQP

NCAQQGWMLTPCQKHHQESLEYFPKGRFVPHCEPDGRYKGVQCYGSLCVCVGPDGLETE

SSRRILLPEYPSCESDPAPTPCVREHRAALASSGRDAFVPRCNPDGSYMEVQCKDLMCY

CVDENGRKVPNTDTLQPFRPPCDKLNPTPCKRARLEALKSYQPGAYIPQCARDGKYKPV

QMHGAYAYCVDGNGREIRKTRVIRPFRPICPPPAPGEVPKRRSVCEQFSQGLDGVCSRR

DDECTKDADCSDDGRCCFNGCYNECATVVPPITPTPELPTTTPIPEPCEREPCNAPHNL

GCRNEGNEAVCICPVCDEVDEAP

>TRINITY_DN1446_c3_g1_TRINITY_DN1446_c3_g1_i2_g.63416

GEAVNPMGAADLTYTVDVRFVGPEISIRTDNIAAEGGQTVFTCSATGTPTPTVVWKIGDK

EIADQEAIPGESVITVTSSSRENYTCEAQNGLFDGDGSLTVARAHISVTGNVPPTITAP

DDRQTSQPGESTLTIVAASQEDAGTFTCEASNGVVDTEDNVIIKTTNVTVDVVAPPDIM

DPEDVNIKLTEGGSVTLPCDVTGIPDPTVQWRKPSGELVDATENDRFSFSGNSLIINDT

VGEDEGNWTCEAANPYGNDSMTIVLHIDGSIGAIGIPSFIGDPTPIVINCTFENSVDAT

VTISKGGQVIRRGKNPLYLYLNVTKKDDFGKYMCSVEDVGERPQKLAYVVSEAERPKKP

ENVSITTSCNGISISWTAPANGDFEISSYRLTWGGGDDEVVLPKDRRQYNISGLDANKI

YDIILTANSGIGAGDKYRQTVRTDQFCDGGVCNLRREGDVYILSASKGVWPVNGLCRAF

SPNDIGDVEDYRVDVKFYNPMDIKGEGRDYFGIIFNTANYKNHDFVFYRPGSGSRSCYH

SGRILNGSLHWYGSNSGPCPFGPPKRKRWLRVSLEVRGSKASLFLDGVHVATIRGQFPT

RGHAGVLLAQHKDNVVHFKDFKITALEPLPFASKACNAIVKYPDFHSLIIGDNLWPGGM

CRVSMPDTAGNNEYILDVKLFSEAGWTGDKVALPGVMFNAKDVDNFDFVYLRPHWRDVC

FQTGYLSEGVFHQGADTNLQSDCTCIPRGAHWFQLTLEVRQNGVGVFVDGKHLTTFKPH

QPLNASGGVVVASGCRRITRFKEFSITTLASLPFTPSGCTSARNLGEQFTLVSGNNYST

DSLCRAVLPGYSPDSLNYTVTVRLYSKTEPQAVNIRFGVMFNVHNDSYFEFVYFRPYRK

ENCIQGGRYERGRVTEYAPKSMSCSYGFLRSGYWYTTKVQVGNDEAQVYMDGYRAATLK

TRVATVGRGGVLLVNGYRRMLSFKGYSISF*

>TRINITY_DN1523_c0_g1_TRINITY_DN1523_c0_g1_i4_g.94058

RDNLTRVLKSLQRDVSGSLVQTGLDEVNTTLQRLIPVIDAYNITMETIREELNIGTVSIT

PLPLAVYPLNETVRAADIGPNSLPDANLRDDWVPGRHGQPGGALDLVGDIAEITNDGNL

DTRRSLSLLVWVYPTGSAGPILHYPDEGRKVPDTFKLWLSTSGGVQFTLADRHNANPSI

ELITDRVAENVWHHVAAVYNYSSGVARVWLNGTVAAERSVGQRDLATDSDVISMGYVTG

LDDVFIGKLSCVQFYGSALTQAHISALMHTCPTGSVVIPGDVSDAVMAQLDLGVTSLGD

SAENTSAMAGMARNEALALEEDVMRAIKVTGNIIKFVQEVAEALKQGQANQSSLIQQAE

KILNKLSEVDFGPANVSVSDERDLVFLALNGSLSNLNDALELWDLVRAVNRTLQLLEAR

LGQILHKSTAVWALAIEAANINSASRRFDSETPMRIAQELHVALKVSLNHVREVLLAAK

DSLNSSAVHYQKFEGNFATLDDLIRQVNERLAKLTEACADVEPLVKMAEDSASRLRNQA

DVLARMLTDTEQFAGKAVNASRRYSEITRALNDSLEIAREADRIASDAQTESLNVSSQA

ELSRNKSNALDADVATAEALVEEVGKNFSALKDYAQNIEQKIRESGADLANVRLGLSEM

ETFSDIENRSSSLEESAVNSFLAAEEARKVAEEIERNLPSLLPVDDARVEFNESFADVK

NDLNEIAANRTNMSRRIEVLRQSHREAEALSSEVKERLEDIQNMMSESHTLLDSMSLVM

KFGAESSVIRSPPPTVLDSSRLTNLLFYAKPQSDTGLLAYLGSVKSRKFRKRLMKDRPV

VDLRRRRIKKQTLKRRRRQIACQKDFAAVFLNEMRVHFAVCMDGVLTEVNSTAALRNGS

WHKIQADISTSEARLSVSFKDEDNVVTETERKSFSVGNPYLMIGQSGKLVIGGIPANKR

LASTLPIGQYHGCMDGLEVNGYGAGPWNAEFQQNVTNCVPRQDFIGAKGSYHLYGVGYL

EVDTTSERDEMFNWRFTFKTPFSNGLLMIGMDKKVDPAPGKTLFFAVEMINEHPDSSKA

ASVTFTSRVNNWNRAPTQPDTKKAARHRLPGQRTFCRRTVSWSGRPSWDAVPTPWNSDS

PSGLADPPAPCCTKLTLRRKTT*

>TRINITY_DN15497_c1_g1_TRINITY_DN15497_c1_g1_i1_g.14116

VSKRVLPRTVCQRRNRVTMKTLLILLVVVVAVVIPVADALECYTCLSTTSWEDCDKNRKL

GTCLAGLDRCAKVYAEGVTKAYGRGCESSQQCKDKDACKLAQLSKCEVDCCDSDGCNGA

AGKVASVFFLAACAVFAFFAI*

>TRINITY_DN1603_c0_g1_TRINITY_DN1603_c0_g1_i7_g.121738

MGDKWVRAQVGLGHMDGNFNIQFKASKFFAAADMAVDDISFPGCALAPIRACSSGEYQCK

RGSCVKPNQVCDFSDDCGDETDELPATCATYKERCDFERDLCSWTQDTDDDFDWTRDNG

GTLSYGTGPGRDHTKGTAKGYYLYIETSSPRKQNDTTRLSSIVFRPITSGANCRLRFWY

HMFGKHVNTLNVHLRTYVNGPLKNIWNLTGNQGDFWRRAEVPLTSGVNYQVVIEGIRGS

DYQGDIAIDDISFTPGCRPDSTATISPDVISPTPPTGCNLGEWKCANGNCIKATSYCNF

KKDCSDGSDEADCPSDACDFQTDFCKWTNPNIGDHYDWTRRKGKTPSSFTGPSADHTLN

TSAGYYVYTEVSNRPGIRADAHLLSPFWRQASRQCTFKFWYHMWGPSIGTLNVHVRRNS

KDLPQWSRSRNQGNKWIQGSVTLPKCVNDFRIVFEAKHFSTSSLGDIAIDDLSFENCAQ

PHPPGVCHSNQFMCANGICVDLDNKCDFDTDCCDGSDERNSTCSGYERCNFEGGLCGFT

QLNSTYDKFDWTRQSGRTGSSGTGPSADHTTGYKNGYYMYIETSSPRKNGDKALLASRV

FQSTRSCKMRFFYHMYGNHIGSLTIYTRTTTTGPMNSVWTKSGNQGNRWIRAVVPLTSS

QNFQVVIAGVAGTSFQGDIAIDDVSFTSDCVVGGTIPGWPTQPTSPPPPGCFKCASGSP

CIDFSKKCDFSNDCADRSDETTCGWPCGFEKDTCGWNQTSSDNFDWTRHSGCTASIATG

PCKDADNNAKGYYMYLETSTGWIGQKAVLVSPQFHQAYANCQLKFSYHMYGRTIGMLIV

YLRDSKNRTRLWYLSGNQGNSWNDTYVSIGRRNGPFTLEFEARRGSSWSGDIAIDKINM

MSCAKPKQCPGSTPVGSFRCGNGACITNNLKCDFTDDCGDGSDEAQCSGYLGRCNFEKD

LCAWKQLKSPEDEIDWRRQKGPTASGGTGPARDHTLGTVAGTYLYMEASGQSFGDRARL

VSPTLKGQCTLRMFYHMYGVHVHSLSVSYRTSVGGPLTVLKNLTGHVGDNWIRQEVTAV

VPSQGYQIVIEAIRGQSYRGDIAIDDLSITGPGCSLGGQLGPYTTPTGVTTTAHPNNCN

AQQFGCVKDGKCIPLAKVCDFHNDCVASSDERDCPKTCAFESDTCGWKNDVSDKDNFDW

SRKNGRTPSIGTGPSIDHNPGSILGYYMYIETSYGTVGDRANFISPLFKRSFSNCRMSF

WYHMYGSSIGALNVYVNSSNRVSLWWRKSGNQGNKWLQGLIGIGKRDKPFQVFFQAVRG

ASFMGDIAIDDIQFLECDLPPITSSCSQFSCARGSCVPGSKKCDYNDDCGDGTDEKYCS

AYQTRCDFSRGWCDWQQSQDDDFDWSRKKGGTASWNTGPPADHTDQTGYYMYIETSWPR

RYGDRAWLVSRNFQATTGASADCYFRFFYHMYGDSVEQLNVYTRKYQNGSVDPANRVLS

FTGSKGALWQRAEVKLTSSDNFQVVVEGVRGDSYTGDIALDDFSFTPGCVQFDGQLPYA

PTPTPTATPPSTPPHACLTSEFNCASQGSQACIPRTQVCDFRPTCQDGSDESACAKTTC

AFDSGDLCGWYVDNPSRTRRALVYTWSTQQGTTGTIATGPTADHTSGTSAGWYAYTESS

AGSLGDRAILTTPRVGQSGPDCVFSFWYHMFGSTVGTLSVKLTTPGGGSTIIWSKTGNQ

GNAWRNAQLVIGSKRLFQVVFEAKRGNGVKGDIAVDDVQFKNCQPLDMTKKCKPSEFKC

LQGGCISQNKLCDFNADCMANDASDESNCAGHPARCNFEHGLCLYSNSRDDKFDWTIAT

DGTYSYGTGPATDHTTGSKKGHYLYIETSWPRKPGDFARLNSPVMDASSTRCVMRFFYH

MKGRDIGSLLVRQRTSYYANGLSKPLFNVTGAQGDFWYKAEVNVPVSNMDFQLVIEGTR

GASYQGDIAIDDVSLSPGCKLCSGTCNIPGEPSPTPFGFHSRPTGSSCGVNQYVCKNLN

CIDKAQICNFKNDCGDNSDELPCGTTCDFEGDCAKGWRQATGADSFNWRRQQGKTASVG

TGPSQDHNPGTATGYYMYIETSFASPGDKAILKSYRYVASNANCRMKLWYHMYGSGVGS

LEVKLKLSDGSYKTLKQLYGDQGNKWKQMSLPISSQRDFEIMIQATRGPNWQGDVAIDD

ITFENCFADIARNCTANEVKCRTNGHCVLEQHVCDFKKDCGDQDDSDESTAVCKARTAN

CNFETNWCNWFNWWNDDFNWKRQHSTGGVGTGPSGDATTGSGFFVYIDSSLPNRPYDRA

RLANSVNFPPSRGLCVIRFYYNMFGSKQMGVLRLFVLRRNRGSWVWNWNEVWRTRGDPS

NNNWVRQEVKLDSWTTFRVGFEATVGGDDKTDISLDDISFSAGCYQGGTPPPPTGSARC

RATEFYCSADDQCINQHWKCDGTRDCSDGEDEIGCPSFSTIPTPSPGRPTPADCNFTNS

MCLWKSAYFADMTFTRNRGRTPSYQTGPDGDHTTGTGYYVYAEATGRYQGHFGELLGPN

MKGSQTCKVYFCYHMYGRSMGTLNVYKRITSDPKPDSTQQRLWTTSGDHGNKWFCKMVD

VNEAKDFSIVFEAMRGNGYQSDIAIDDIKFSDCGGLGPTAAPTSTPKPSIVDETFEKCT

SCWKNEKSGHDQFDWIIGRGETASQNTGPSYDHTLKTIYGRYLYIDVSSAANVSGWAHA

DLESRVITNVQRRCFLTLWYHMYGAGVGALRIVAYVIPKGGNENNKKEVNLLSLWGNQG

NKWQQAKVSLYNQQTKGQDMRIAIGGQRGWDLTGDIAIDDLQLHNCDLKDGLSPCSEKF

AKCNDKPFTRPTLGSLGGDCDFEHNGLCHWNNSGVADMPWYLRKGSTGSSTTGPSVDHT

KGTGQGYYIHIEASWYARGSIAVMESPYIMPTDSCTMTFWYHMFGGDCGSLLVFLNSGD

DLSLKFNETGDHGDKWFQGTVKLSSAYGFRVHLVASRGNSYKGDIALDDISFKGDCKFT

VDSSLKYGGKALTSGCSDGGREGFFNNPKVAGCRGLWWGRKNLRDSPSSPDPLCGDDVG

RWGRTCVKPADLCAKGWHICGTYGNISEIVNRTTGSDCQRAAYGRFSAAINHCTEKQPD

ADGCARPAVQKTYGCSMYHAPCSEPLCCGYDCSGPDPNNCDSGIFKNGLTRYTTSVGQM

QGCAFISMPSAGGVMCCKDDANTPTPAPTGPPTIGSCNFEKDLCGWTVDKKDGASFYKY

KGETPGRNTGPRYDHTRQDANGYYVFMYAAGAKPAAIARIRSPMLPSTPSSCRVNFYYH

MYGLGIGSLRMNLIVDGKSTKVWEKNGDQGDGWLRGTKDFQSQINSNKRFQIEFEAVRG

PTAAGDIALDDISFTDCNNQQGKCHRDQFKCKTSGQCVSSNFVCDGVADCNDHSDEDGC

GSCNLKQVYCKAEDKCLNRTLQCNGIKDCQDWSDESFCRCTDGYCLHGRCQLDGDGRPD

CFCQDGWNGTRCQNKMNFSCGAELIVCKVGDWFCGNKTAVCNKEVSCKLSPSDFKKYCP

GSPPVNPAARTSDKKSTSTYIAIGVAGAVFLILLVLGVAYFVMKGRRRKLQLFSVFYDP

TKDDQSAIKGAKGKGVEMAEGVGNPVYDSLNDGQQLQEFQMSDLDTNMFVSDEAFGMPSE

KGGASSMANPLYQDPYVEEDLEKY*

>TRINITY_DN1700_c0_g1_TRINITY_DN1700_c0_g1_i11_g.71464

RPKRSLPPVLHVLLLVLVVSRTSRKTMKSAVLLLVTIAVLLCEVHGAVQMRWCYKGNMEK

RKCEDLKNVIPSVAKAAGVADVTSKCVDGTDAEGCLRLIKEKTADLTGLDGGEMLRAET

YVIPIVSETHAGTGIKYYAVAVAKKSSPNINLKNLNGTKTCHTGARRSAGWVLPIGYML

SKKIMPSGPCNKVRDFLAAGKFFSKSCVPNVKTYNASGNLPGNLCALCKKDCSSADDYA

GYAGAFQCMNDGKGDVAFVKHTTVESAGVNTTAFEYLCKDGTRKAIGQHEQCNLGYSPA

HAVVARKDDSQVANYVKVLLKLNELYGTTQTNDTGFQLFNSTKYRGKDLLFKDSATGLN

DIGKKTIRDYFGEYYDDYKAVNCEDPGKPKTTTPGPTSKASALSVQNIMVPLSMIVAVL

VAGM*

>TRINITY_DN178_c4_g1_TRINITY_DN178_c4_g1_i5_g.76115

MTGEVEFSSLTKEDVKIKLEQPDRVPRRPSDEEVAKHRKTRVILVVFFGLVVLAMVVAAV

IIIIVSPKCAKAGDGGDGDKDGNVTTTDGLKEWWRGEIVYQIYPRSFKDSSGDGNGDLK

GILEKINHFKDIGVKIVRLSPIYKPTDFKDVDTMFGTMQDFDDLLKKAHEMGVKIVLDF

VPNYTSDEHPWFVDSKNPKGTKRDWYIWREGNDTHPPTNWASVDGGSAWEREGNSSYYY

LHQFSKEQPDLNLRNAAVVDSLKDAMKFWLDKGIDGFALEKVQFLLEELGKDEEQTALY

NKSLPLKYNMLVHKYTHDLSGNQDIVKNFQELIANYSGTVLMAEVTGSPNRSAQYYKVC

DFPYNIDLIPTSSAKSLSRSISDSVSGSLKNLPKGKSPNWLIGSQYKDRVGADLIKAMN

VLLLTLPGTPSTYYGEEIGLVNANTSVSPMQWSAENNAGFTSSKPWKTVSASYKTVNVA

EEQTKNGSVFSLYKKLVELRTKEAFNSSDFVVVHVDNQIMAYTRGDHAYLMAINFSDQL

WDGDLDKLSGRGKVVVDTEGKDVGKTVDVNKIKLNFKQALVVELHPEHTMSS*

>TRINITY_DN1829_c5_g1_TRINITY_DN1829_c5_g1_i1_g.102497

LHLNDSHYLAYVHWAGDKRDTIVMLTRDIHPSSGSTSHVWISEDYGQSFVNRTSSFRTLG

GSPALINLFYASSVDKTKYLFVDRVHKLIFRTVDDCQTFFRRQVSFTPDDILFHPTDDQ

VVLAYDRTSSVKRLYVSQNFGFSWRLKDEHVRTYYWGTPPLDNGNTLYIEREEQSGGTS

VVVKTDYFSNSAVVLISGVNDFELLDNYMFATKPASSGSSSLTLMVSKDRSAFQVAQIA

TYQATQDFYIADASENQVFLAVTHNSRTTHLYISDTSGTQYSLSLERVLYFSSGTSSSW

LRRYLDHDFVDLHKVDGLRGVYIVSQLSVGQVGRRHISSLITFDKGGEWQKLNPPTEDP

SGGALNCQLPNCSLHISQEFGKFYPYTRYSPILSRKSAPGIVLGMGSLGQYLQLNGDVF

LSNDAGLTWHQILKGKFYYNIGDHGGVVIAVPRGTYTNLIYYSWNEGETWMTYQFMNDD

RIRVYGLLTEPGEQSTTFTVFGSHPGRHQWTLVQINLRKVLGNPCRPEDYKQWVPSDAL

NGTCLLGSKTTYERRIAHAHCFIGYDYDRPISQQSCPCTREDFECDVDYRLDFGSCEWD

PSAGRPTLVPPVCPPGTTFLRTKGYRKVSGDMCSGGEEDRYAKQVTSCPIPDLPEFLLY

AARTAIRRITLGDNTEQDIPLNGLRNAIAIDFDYKHNCIYWADITTDNIKRAFLNGSGI

VQILHGITQQVEGLALDYLADNIYWVDAGAKRIEVSKADGRFRKVLFQVNLDRPRAIVL

DPNHGYMYWTDWGSQARIERASMSGGTRTTIVTGDLEWPNGITIDTVQRKLYWTDAGKD

KIERSNLDGSNRQTILTVGLPHPYAIAVFQEFMYWDDWSNQAIFRALKSGGGARTTIKS

GVPGVMDLKIFSQDAQKGNSSCDSWNPCSHLCLTSTTYPSYECACPDSMRTTIGPSGDI

VCHCMPGEHVDASGDCTSQVATCNSGQFTCANRRCIPSSWRCDHDNDCGDNSDETGCSY

SSCGPASFQCDNGRCIPARWKCDHDNDCHDYSDERNCTFPTCRSDQFTCNNRRCISQRW

VCDGDRDCSDGSDEQGCTPPPSTAVPSNVTCRSSQFQCHNGRCIPSSWRCDGDQDCGDG

SDEPPTCTTSCLSGYFRCVSSGHCIPGSWKCDTEDDCSDASDEVGCNYTTTPAPSTTTS

TRPRVCMSWEYRCTNGLCIYQFDVCDGVNDCGDNSDEIFCGAGNTTTSPPTGPCHYWEF

TCRNGGCVNNGLRCDGKDDCGDYSDEMGCAPRTTPQTTTRPHFCPVGWLRCSHNPSSIC

ISRRWLCDGIINCPMAWDEQPSNCPSSTVSPHTCPVTDYMCANGQCIPRSYVCNGIGDC

SDGSDETGCGPVTPTACSGFLCDGGTLCLPSIKHCDGYIDCRDKTDESTCVTNLRVTAK

TGSTVELGWTPVSIAPPGTIITGHRITYRATRIRSDPAPADQPWASKDVTTMNYALIDH

LQPCSEYEFRVQVRTSALVGPPTDPLKTTTPTVRTGPPFNITSVKLSDHSLQISWHAPI

LFCHPVTNYKVSYRRTGSSDPPSIQLTSNVNQCILTGLIPGVSYAITVTAFDNFNWGQT

SEEHTVTIPNVPVRPTSPVQNLEASDVKSQAVTLVWQQPIGPDGSKIAVVGYRVYQAGA

TTITTTSHNCTVTGLNPGTGYTFKVVPFNEVGEGPPAFVAVTTKGAHVGAPTSLVAKAV

NNTAIKLKWNAPGNVSSSPVYFIFYGTTHSGVSGVPTGRTSVTTYTVGNLHSDEVYVFE

VSVGRDGVHSVPVNAKPVMDTDRQPVHSLKAKLVDSNTVVLTWGKPVNVSNREIQKYKV

VYSYEESGSTTSKTVFTTANTPTTKTLKYLRFSILYTFSVMTRLTNGKEGEPVHVLQAT

GAFTAPVGTVKATLKARHLQLTWSAPRQIDPKTWLKFYEISWYVVTNPAASGNTTSSDV

TYSRSVEPGQTYRFSVRAVTIYGKGSAGYVTVSVPAHATAVQNLRSRLDGRKLTLTWEA

PKDDDQSHIEYYQVSWCRYCDFSSHTARVNVTSFSVQVERGFVYQFSVQPKLPDGLGTA

VEINVTTPEVKAQVQYLTYWLDFYQIDVHLSWSPPRASDLSGSCPLQGYEVMYNLARYP

YWPPPYTIRTNETNLRVNMSYYNEVYEFSVRPLTACGAGRSTKKTVVIPPVPSSSINDL

LCTSTNYSIRITWSQPGYDFPRLFFSAYDIKYRCRDCLSARWHFDHISNFNRTVFQFYG

SPGNTYDTWVRARTSRGYGQYSQSSCRLAALPVQVSSLRYSAKGKTVTFSWTGPASIKD

FMYYLLTLTCTSCPCENSARKVNVTATAFQTDVKRGHTYNVAVVVVTKKGSGKAIGQHF

FVAAVPNLQVEKLGVSGDNVTYRTVTWQAPKTSSKIQDYLVRLVDTSNKKCVMKTSVTD

KKSVILSHLENGHSYNVTVTAVVDEGEGASQFALFSVYAEPSPNARTSSKKKMSPVVWA

VPVGIVGLLLVVALVYFVMRTRRLQNSMYVMLHRSSDRGGGEVTFHAEEDDVPLISGFS

DDEPLVTA*

>TRINITY_DN1902_c0_g1_TRINITY_DN1902_c0_g1_i10_g.54500

MATEPSVASSHIEHLIAEIESSDGLLGPTLRAVYDGNQPKELLEKLEDRIRTHDKDIERM

CNYHYQGFIESVNELLKVRGEAKKLKMKVKQVNEDLQGSGRELVGKCEELIECRTTQRN

IASATESLTLCLPVLDMYAKLKDQMEQKRYYPALKTLEQLEHTYLPRITKFRFAEIMKS

SIPEFREHIKEASMSDLRDFLEKIRGVSEKLGSMAMKQAVQRSSLTLLHGVGGRKKGDD

EELDKCAQDIVDFSPVYRCLHIYTVLGERETFDNYYRKQRRKQARLVLAPSHGVIDESL

EAYRSYFHQIVGFFVVEDTILNTTKGLVTRSTVDNLWEMAASKIAPVLLTCTQSAYCKE

PSLLLQVKELIVWFCHTLSGFGFNVNQMNDVLFEMRSQHTATLMKSWETKFSELLAEDN

YTPVRCETEEELVRLLQDFPFDDSELREQPFPKNLPFSQCVIQIYKAIKEYINSYLKFY

ENVNVSQTEAGDAVRKSTNLLVTRSLSACFVEVMKGGITIPQLVQVSVNTVHLEAACPH

LEEYVSKLTGTANDSVNAARLYGLSTFKDLRAEAEQQIYEELNKKIGEFLELANYDWLP

AKPRKEPSEFLADLLIYLKSTFMNFTSLQGSVAQTACMSSCKHLANRLRGLLLDNEVKQ

ISISGLEGFNIDLRKCEGKCARVFVCVMVYVCARGRSCSCMCVVAAECASLSVRACACA

HVIVLMFTYLSVRVCSRA*

>TRINITY_DN192_c1_g1_TRINITY_DN192_c1_g1_i1_g.77571

VGVLPQDKGSYTCEASSGDGTVAKASSKIVEVYEAPTITLNPALPEVVKDLKDSVTLMCT

ARGTPPVQVTWKKEGGKPMDGQKVSPGKSVLTLTDVRLSDVATYTCQASNNARGVDGNL

IVVEKSVKLRVRSKPVINAKASPHVVYSFVGNQDAVSIRCSFDGYPSPKVKIYGLKNKK

VANGTGTATYKLFTKEPKMFITYRCNAKNIYGKVNHTVKLDYAQPPTAVRDLAAADVTC

NAIKIKWREPEKNGGMPVRQYVVEYMKTRVNVESPDTEYHASDLKPEMDYKFTVWPRNN

AHDGPREEITIETKKYCKPSRPVILEPLTEILEDTTFVLKWRRPELDGGDPNISYKVRY

APVAEADESVEKNELKTSSLQVTLSDLKLGTKYNVEVVAINKGGESDPATRQYQVPRVA

ARSRATPALASVVFTILTVGLALTMK*

>TRINITY_DN1941_c0_g2_TRINITY_DN1941_c0_g2_i1_g.55141

MTASAKMLRRCFTLLLLFSLSECYLKRVSRLSSPLEGGLGWKVEEIDVADYVKGSVWPKP

QKLAQTDGVEFSLDPKKFQFVSVGQSSDVLSAALLRYKNITFPLEVNAPPCKGRALQEI

ATLSVKVVKPYEDLSLESDESYTLDVNAPSSSLVAATVWGALRGLETFSQIVRQDMEGL

YYANKTNVMDYPRFQHRGFLIDTSRHYLKLPIIKKFLDAMSYSKFNVLHWHIVDETSFP

FVSDTYPQLSGQGAFNNKTHVYTKEDVAAVLEYARLRGIRVVPEFDTPGHTFSWRSIPG

FLTPCYKEGKPTGSLGPVNPTVDGNYDFLQKFFAEVAERFPDKYVHLGGDEVPFSCWQS

NPDITAWMKKMGYGTNYSRLEEYYEQKLLKIVGDLGKKYIIWQEVVDNNVQVLPDTVVN

VWKGGWENEMAKVTGKNLKAILSSCWYLNYISYKQPWHQYYQCDPTNFPGTDEQKKLVM

GGTGCMWGEWVDGTNILSRTWARALAVGERLWSSKDVTDLTDANWRFWEHRCRYLLRGI

PAENGIEAQYCRHEWSD*

>TRINITY_DN19449_c0_g2_TRINITY_DN19449_c0_g2_i1_g.97056

EVLRDSSQISANTLKAKACIDLYGLGAITGGKSESVGDECTKLSSESVKSARRVSSENVL

IVRGGSTNLQAQLRTKETRTIDLINQFLVEGQREGARPIEYEWKPIYTILEGRLKGDSN

RRKVTHLKMFFEGMLSYGCKYRHEGDVELRKFVILGTPQRPEYQCQLATTGCRKDSDCD

KSLLSGCYCYGSSCIDELRLKGGEKEDRRIRRKKEGGTFEGVNRSCKLTFFSGCECEHR

GSDWETVWSSEQADKDQEDDTATEEDDEGDHSGTAGTLDDQEPSARHNSSDRDRA*

>TRINITY_DN19865_c0_g2_TRINITY_DN19865_c0_g2_i1_g.79383

WRPAFEELGQRRRRRRRRRRRRKRRRGRRRRGRRLSKIEMNTKIIIALIFVVTSGFCHGR

EVCCPENWVGFQSYCYLFDTRQGNWGQAESICKQECAHLVSIKSAEEQRFVEKFLRGNT

WLGTSDEHQEGRWVWEDDGSQLAYTNWKSGEPNNARGNEDYGMLYQDGKWNDTPSGQTR

YVVCKKRAG*

>TRINITY_DN2052_c0_g1_TRINITY_DN2052_c0_g1_i2_g.8062

SEVSFTLVDDQPGESKFWEGYVVEVKKTVGKRSLDKRASSRSVDITTPSVASSPCLTCGD

PHITSYDKKYYNQLRAPGDYILTSNQQRNFEVHARIHRCWSVVCNCGVAIRENNDVIRV

DKCGGF

>TRINITY_DN2083_c1_g2_TRINITY_DN2083_c1_g2_i3_g.8012

LLHLSAQYAEPLELANMQLLLVLSCVAVLLLRSAKAEDCADKNDGCLGWADRGFCAEVSR

YHDYMMNNCKLSCGQCGGCADKKDGCPGWADQGFCAEVSRYHDYMMNNCKLSCGQCGGC

ADKKDGCPGWANKGFCAEVSRYHDYMMKNCKRSCGLCRGLVTNPPPTTEAKGCKDGKPE

CPIFKARGYCVRGSRFYAFATRTCPASCGLCKAKPTPIPRVDAAACL

>TRINITY_DN2216_c0_g1_TRINITY_DN2216_c0_g1_i1_g.113164

MSDAVEEGYSSRRRRRIAEDDTEDEAAKRREQRRKEREARRAEREKEDNDEEERRKAREE

RRRRRDAGDDAAGEETASSRRRREREEAKKKEEEEARQRQEEEERRRRGEEEQRRREEE

EQRRREEERRKQEEEEEEEEEEEEEEEPPSRPQDHMDAVNGEPEEEEEEEDDSIFAQMS

PQKKQAILDGLAAHMRGIVEEREAKSQPVTQVELDELDLKIRSLKTQVRKQEETQMQLQ

KQKRELEEKVTRNESTLTRLRTELKNAENENELAIKEGRKTKAAPGSRPVAKKVEPKGL

GFLSVVKKAQAAAWEDKFKAMREKKKNQMSDELMNTMNRVKRNESPLVGINLTKKKPDA

PKEDKPLWANTQLRKGGPAAKIDKKEGGKPDWSTRSSLKKTERRSESEVDAGKYNWRDQ

LKKSSPRSPGPDKVTDSVQEPAWKNISLRATPKRAEDDAD*

>TRINITY_DN230_c2_g1_TRINITY_DN230_c2_g1_i11_g.31027

MCLKDSECAVGEKCCFNGCQNDCVKPAIFTSAKPQSTTTKTNEPVSAGKCPKPTKGQRGL

CDFRGDMCLKDSECAVGEKCCFNGCQNDCVKPVAATPCKDAVEELDQRKNDPPMVGVFR

PTCKSDGWYDEVQCHGSTGHCWCADEFGNEVAGTRMRGRPDCAKPERANADLNNTCPPP

WKGETGFCDRMGDECSIDAMCAETEKCCFSGCQRLCTKAVGFSAGVKPGTCPKVWKGTN

GICDRRGDACDGDESCEGSKKCCFNGCQKDCVLPGLTPCQAKYEESLSLPALGRFMPKC

KPNGRFAAAQCHGSTGHCWCVDEDGVELAGTRARENVNCSKPDPCAKKNCRNHARCVVS

ADGLSASCKCPLACPLSYEPVCGSDGQTHSNLCTLRSTACLEEREIRVAYPGECLPADA

CASVKCGNNSQCIVLAGVTQCVCIGSEHLPCESADEPVCGSDGVVYPNLCQLQNEACTE

EKDIAPALPEVCEGPVDVCNSTKCAHPLQLCVEKNGRPVCECPVMACTRESDPVCGSDG

DSYPTECMMQLLSCERDMVVTVDYKGFCTDKPGVVLSDQDPCKTVSCSHPLQECRVVND

TATCVCPTAVTLEYAPVCASDGKTYPNRRSMAVEGCLNDQVLEVERDGSCLSDPCEISL

CSHKRHTCRLVV

>TRINITY_DN23480_c0_g1_TRINITY_DN23480_c0_g1_i1_g.106780

FDGLEGNRLNAYEVKRMIGQIPYRQGDTRFDRALDLANSKLFSKEGGARPYASKLLMVVT

DSGLTPDAGQYNSFREAAQRLRDRGVRVSTLGVGTQYPTAELEKSGKFFNSPTFVALPF

FVPVVLNDWWRYLWDQGLNADIGFVLESSDNVTPQQWGEILGFAQRTVRALHSSPRGNR

FGMISYGADRRINFYFNTLAGYKINDAEVNKLIAAAPKLNGAPRLDLALRAASERLFTV

ENGMRPDAPKHLIVVTAGRQSNPGLAAAAQAIRDRGIHVYAVGLGPNDYTQEAQAIVSS

PDNIFRESYSQLPEFGADLWGVIRRITWSRWRYPLLDVGFLFGASSETTPQRWSRYLEF

ARRVVDTLNVGSDRDRVGSIVFDSEARISFRFNTLQGYGYTRDGVKRLIDDQRYQQRPI

RVDRALELARRDLFTQRSGMRPYARQVLILLVDAPQDQEA

>TRINITY_DN24487_c0_g1_TRINITY_DN24487_c0_g1_i1_g.57476

SPGSPVWTRVKGQGNQWFVSQVSITNVAHVTILFEAIRGSSFQGDIAIDDITLMDGACPQ

TGYCDFEKFDSCTWSNSKSEDDFDWTIGFGSTPSGNTGPTVDHTTGLGIGKFIYIEASN

PRRPGHKARLLSERFPATSANGYCVKFWYHMYGASIGTLNVLVKTAPGNRSETIVWSLS

GNQQQQWRYGQAPVLSTLGGFQVVFEGIVGSGYAGDITLDDITYTAGSCVVLPSNAVPT

TPTPPTAAPPSPTTLPAGSSDCDFEAGFCSWTQDSSDHFNWTRQQGKTSSDQTGPTTDH

TLKTGNGTYTHIETSWPRKPNDTARLISPLRPRNARPGDCLQFWYHMYGPDINLLNVYV

MTNKVLGNLVWKRQGNQGNVWKYGQFFVRSLSSYQIVFEGVRGKGYRGDIALDDVKITS

GFCPPLKECSFEPSDLCGWTNEPNSIDNFDWTQQSGATASSGTGPGFDHTFGTAKGMYM

YIETSTQKVGDKSRLLSPRYGATTGKCLRFWYHMYGNGIGTLNVRIKRVLFGRPFYFLQ

WSRTGNHGNIWRVAQVTIRSGSNFQVAFEGIRGQTYQGDIAIDDVQLLDNPCPPPGDCN

FEAGTCTWTNARNTDQFDWLRSSGSTASFYTGPSVDHTLGTDGGYYMFIETSSPQKQND

KAHLVSEEFQPTGASGRCVKFWYHMYGKDIDTMNVWINTTTGKIGQIWSLSGDKGDKWY

YGQAPVSSKEVYQIIFEGIKGQSYQGDIAIDDIEFTVGTCNVLPANAKPSNPWTTPITS

TVAVTTGPTSAPSVYDCNFEQNFCTWTQSVADTFNWTRRQGASPSVGTGPGIDHTTGGS

TGYYAFIETSS

>TRINITY_DN2531_c0_g1_TRINITY_DN2531_c0_g1_i2_g.46011

GTCNTAVLAPPNSCPGENVCCRQLGKCPGVCVSADLKCRNPIQVVPGACPVGEQCCKEEC

DGQCVPPGTCNTAVLAPPNSCPGENVCCRQLEKCPGVCVSADLKCRNPIQVVPGACPVG

QQCCKEECDGQCVPPGTCNTAVLAPPNSCPGENVCCRQLEKCPGEIGTASGSGRVEIAV

CVSADLKCRNPIQVVPGACPVGQQCCKEECDGKCVPPGTCNTAVLAPPNSCPGEDVCCK

PLEACSATCVSSLQCNVQTQGACPGSQVCCLEPCRDCGPQLLCEGQCRRPELCLNPLSK

GACPNAGEICCEAVQ*

>TRINITY_DN261_c0_g1_TRINITY_DN261_c0_g1_i25_g.30933

FTTCIWMRSTHQLVGKNEAPLFSYATSRSDNEFLFFIGGGYLRVLCQAKSATVDYKVNEK

VNDGQWHHLCLTWENSAGSMNIYKDGERLGGAVGYSKGQKIAAGGLLVLGQEQDTVGGG

FDPNQSFTGDLSGANVWNHVLTAQQISTLSKSCLAGEGNVFQWSDFRSHTHGNVEVNAP

SKCQA*

>TRINITY_DN26_c0_g1_TRINITY_DN26_c0_g1_i14_g.3080

MKVFVLLCLLAGAFASSPEENLDVSRSDVQLAEGDIAVDGESRGSVGQRLWPGGVFVYDI

ESSLDDPLAKQQIQLAMSDWSQNTCITFKKRTTETAYVSMFRGSGCWSYVGRTGRKQQL

SLARGCWGKGTIIHEIGHALGYLHEQSRPDRDNYVEIKFENIQSGKEGNFRKSSSVNSL

GTPYDYGSIMHYGARYFSKNGQPTIVPKKAGVTIGNRKALSPIDIRQMNLLYKCGGGGG

TPAPPTQGPTPPPPGVGLNCNFEKDLCGFTQSRNDKFDWTRRSGSTTSSNTGPSSGNGG

SGYYMYIETSSPRVQGDNAKLSKTVSLSGSSCLSFYYHMHGSSMGSLKVTLDGKQVFSK

SGNQGNQWQQEKDIRLSGSGNKQLEFEGITGSSYTGDAAIDDVRVYDCQAPPPTPPPPP

PPTTQQPPPPPVTTQAPPPPPGGCGVSPISRVIGGVDAKPGHWPWQIALLMGGRFGCGG

SLIAPDWIVTAAHCVGSSNPANYQIRLGDHNRNVNEGTEQTIPAKRVIKHSGYNKPTPI

NNDIALIQLARPATLNSRVQTVCLPSHDYDVPTSSRCFITGWGKIKHPGSSHHILQQAQ

MPPVKKDVCAKKLAASPGGSSLTITDQMLCAGVENTILSGCHGDSGGPYVCQNSAGRWV

LQGAVSWGSPRCSSKERFSVFARVAKFRNWIDQLTGGIVPPNSPPPNTPAPPNTPAPPA

GLNCDFEKDLCGFTQSRNDKFDWTRRSGSTTSSNTGPSSGNGGSGYYMYIETSSPRVQG

DNAKLSKTVSLSGSSCLSFYYHMYGSDMGSLKVTVGGQEVFSKSGDQGNQWSRFEVSLS

GSGDNLLEFEGTRGPSWAGDAAIDDVRVYECNAGPVTPPAPGACGLRPNTRIVGGVDAN

HGDWPWQVMLRSSSGRQYCGGTLVAPQWVITATHCVENQSPSVTFVRLGAHKRTSDVGT

EQDFGVTKVINHPSYHSPLRYAHDIALLKLDRPAQLNKYVSLACLPDGVPDPGDGTKCW

ITGWGTLSSGGSQPEILQQASVPVVSRARCDQAYPSEIHDSMICAGLDQGGIDSCQGDS

GGPMVCETGGRYYLHGVTSWGYGCASAGKFGVYAKVTYVMKWLNDEMAKN*

>TRINITY_DN2797_c0_g1_TRINITY_DN2797_c0_g1_i12_g.26224

MYTHGGKTNGQVSMYNQRRPNFSSRNPRTDAHQPWAAVGAWFLGPRAENGELFMKLASKA

VLDQIAFRKSYYPADPVYVTDELKNGQTYTNTVKKMEKQLVGLTQELQRSVPFFSSRYK

GHVNWDTLMPANLGYMTAMLYNPNNCAAEASPVTTQYELEVGQGLCKMLGYDDRSTGHL

VTGGSLANIEGVWAARNLKYYALGLQEAALKEPKLKAAQEYPVYIPSLQRNVPLAKATA

WQLLNLNIDPDVVEMPEKVLKWINEKDSGDELTDTDLKDILTGYAYETVGTQEFCRRHN

LKKPACFLTPSTCHVSFVKAATILGLGKENIDLVPVDDRARMNTEELRKILEQKLAHEI

PVICVVAVMGTTEESSIDPLTSIVKIREDMRKKGLNFAIHADGAWGGYFASMLRDPPKN

HHMGNPTAVGFVPEMLLSEYVHREIAAFHECDTITIDPHKSGFCPYPAGAICYKDERMN

NFLNITGSVLYYHGDVNLGDVGIEGSKPGAAAAGVMLAHRVVGLDKNGYGRILAECTFT

AKVLYCAWVALPQPDDLFEIAPLQPLPPNVSVDFVRRILRERILDKSNEELAQDEEAMK

FLQEIGPDTLVPCFSVNLRGNKDVNICNAINTAIFKDLCHATDQVTAHRTPMLVTTSTL

EHLKHNNALKKLKKNLGLDPTDTTGVKYIITTCMDPWSTSTDFIDELAAVMRNAILCAI

GSATDQKGHHDFISGGKASKKGKVTVSYAGNFKKPEHKYFSMAKLQFVDKSDATKFNFK

AEEKVETPPLVFRNTKKDRVHDVLIFDTEEDDVGERHQRTDMFDIYEGMPDAGNAPFMT

EVEMKVLDVPRFDHFDPLATDYPEFSTYFMYGTAKRAYISHIPTKQPDFEQLVELQEIP

DDMTPLLPMNGVEVQLTEVTGSPQIDAAGKVVNPLTKDEYKIQYIGYEGQKHESTIKLG

TRIWFSGEL*

>TRINITY_DN2994_c0_g1_TRINITY_DN2994_c0_g1_i10_g.6144

MASGGVVLIKYLLFFFNFIFWLSGLALIIIGGIIKVNYGNFIQVSDSSITTAPVFLIIIG

VVVAIVGFLGCCGAYKENYCMITTFAVLLAIIFILEIAAGALSYAYRGKLEDFAKKGLQ

KGVDNYAEEKYKDAMDKIQQQFKCCGVDGPADYQTSNKTGPIKSCCRDKECKPSKNASA

EYDYFSSGCVPAFEKYMKDHLMILGGVGIGIAFIQLIGIIFSCCLMRSIKKEYEVSPCR

GGIQKTVVRTKMFVSTTPSFCIGPLLYILDSLLLIPGFPFL

>TRINITY_DN3017_c0_g1_TRINITY_DN3017_c0_g1_i6_g.81205

ARALKAHAMALQRHAAGYHGKHHGTHHAGHHGTHHGTHHAGHHAAKHHGGHHAGHHGGHH

AGHHGGHYAGHHVVIDHKKAVHALVHKYGKGGHAKINLKKIQKEVSKIGYCAAKKAGYK

IGYNYGKGLGFKIGLNKARLLALELHKGHHGLKNLRALNKGGYGGYGKHGHAHGGHAHG

GHAHGKKWH*

>TRINITY_DN3082_c0_g1_TRINITY_DN3082_c0_g1_i5_g.80876

MENQAVPLCLPNNCSWDPLTGEYSQEEDQDRKTLWVVDEALKRLRQIKGPVCVVSIAGPC

RKGKSYILSKAFDQGEVFPLGHSLDPETMGIWLWIVPQKYKDSNGREFTVVLLDSEGID

AVSSESSDDHRIFTLTVLLASVLIYNSAGVPTRKDLEGLDFIVQLSKRVRMGSAEDNPM

EDDVKYLHKTFPFFIWLLRDVVLQIPKSCSDITDYFMKRVFKAPKAQTGATGADNAQQA

AESIMKFFPGFHAFKLPPPSADPKVAQNMNSAESSVNQEFLKGVAEFSKSLKERLSLKR

SFNDGELVTGEALAAMAELYIAALNTPGTVPNIKSTWEIFVQNKCTEATKAALALYGDI

FTSHVKDLLPCDSDDLRRIHQDALERSLELFKEETRGILAAHVDKYLTDWKDKAEKNLS

DWQEKNDKETEDFCNRLLQSLKKQHLEPVLAKLIGPDGAKMTFAAIIEAYSAIETGFKN

KARGARDICASTFFNFHPELKAEMEKHVDHLQQLKDYDEQLAQQRAARAAEEEARGSSA

AAEGLRRTTGSAASGESGRGRS

>TRINITY_DN3155_c0_g2_TRINITY_DN3155_c0_g2_i7_g.37801

MMTKIILLALVLFVATDAKKGGGCGKKALCKGLEELKKRVDDLEQEIHDLKVGPKDYSLH

FPKIGKTDYASMKGMPEFQAITTCIWMRSTQKLSGNILTPLFSYATSRSNNEFLFFMGN

GFLRVLCQGKNANVVYQVNEKVNDGQWHHLCSTWENSAGSVNIYKDGERLGGAVGFRKG

QKIVAGGLLVLGQEQDSVGGGFVASESFVGDISGANVWSCVLTAEQISELSKSCLAGRG

NVFSWAGIRGKPMHGNVQVIEPSRCQACR*

>TRINITY_DN31932_c0_g2_TRINITY_DN31932_c0_g2_i1_g.18764

MYSSRDVRGSDTQPWAALGAWFLGPKGENGDLFQNLVRSAVHSHLKFREKYFPCDPIYVT

DEVKAAKSYQETVAYMKKQLHSMSEELERSVPFFTSRYKGHVLWDTVMPANLGYITALL

YNQNNCAQEA

>TRINITY_DN3221_c0_g1_TRINITY_DN3221_c0_g1_i2_g.60832

MKTIFALALFGAAVLLAQGEEFSVEHMELLDALEDPHRRPRPSGRPFPSRRPRPTPPEFV

RKCLEKAKGCWQNADDACDKIKCAKELRECVKAAAPKPSNMPTAVPPRVKICKEAAQKC

MQDAGDDCKEQLKCLVKLKVCLHRGPRGPRPTPPEFVRKCAAEGKKCMENAADSCMKFG

CAEAFGKCLKSNKPTGLPTRVPPRAKICFGRAKQCVADAGDDCDEKLRCLKILKICLHR

RPRRPRGDEDMEFDEFQAEELMAFQ*

>TRINITY_DN3260_c0_g1_TRINITY_DN3260_c0_g1_i1_g.61216

VVKCDRGLSEGSWYRFSGGAGAQIPESVVPTWHCGTHAPGWMDGKHPSVGEGVVSRKVCF

HWTSGNCQWSKVIQVRNCGNFYVYKLLKPPGCSMRYCGEQAGGGGTPAPPNSPPPPHTP

APPNTPAPPTAPPSGRCGKRPAGSRVVGGQDAAAHAWPWQISLRVNGGHICGGTLIDAE

HVVTAAHCVYRNPRPSGYTVVVGGHRRTGSTAVQQTRRLKELHKHSGFTMQNLRHDIAL

LRLESPVQLSEKVSPACLPSSKPAVGAKCYITGWGRISGGGPAADILQQAMLPVVSTAA

CKRKYGSIIDESPHLCAGSGQASSSGGCNGDSGGPLVCEEGGRWLLHGAVSFGMRNCPT

THYTVFARITSYIKWINDRRSSGSGGATPPPPNTPAPGTPPPPASCGIRPSSRIVGGVA

AKHGDWPWQAMLRTTSGFPYCGGTLVSPQWVVTATHCVTGKSPSSIIIRMGAHRRVNNV

GSEQDIRVSKVITHPSYHKPQRYSHDIALLKLERPAALNRYVNLACLPHSVTAPSDGTK

CWITGWGRLA

>TRINITY_DN3424_c0_g1_TRINITY_DN3424_c0_g1_i1_g.44298

RRIIDVTGKVTLSKSRILLDGNETSCTIQGDPRDCVDVTLFLKYVDPTLPSHKDLRIEYT

LELDSDVDLRRMYFLNGKSEESSTVKGSHTFSAQNTLETVGHFKVYIMDTEKIADVISE

LTFDLTYTINETSGCIVDLCPVLNDYTKNSVRAVAFFQKKCKTAECILDLAVKGQIDYP

GDYQELRIGLVNEMTVQLTVENLEQDTAYDAKVILTYPSSLGYIGVKSDERLFCDKSGD

GNGNGTSALTCTLVSPANPMDGLSERRFVVKFSTQKVKSAFKITVETSSGVVQDTNDKN

NKAEFPVDVKFEADLEMRGSSNPDQVVYSEEEAKETKLIQKDIGPKIVQTLQIRNNGPS

PVDGSEVKISIPVSYGTAPDDYLLYLLNVELTAGTCKDAPVNPKDIPEEKDNSTKPEND

NGRRKRRDVESGKLNCRRASCKTFECSLGLLDVGSTVEIQITARLWQSTLVKHKVGVVD

LETEARVKVPERFSQSNEDNDQVLITTRANPAKQEIVGKSTPWYVIFASVLGGILLLVA

AAALLYKFGFFKRKRYGQEISNPQNEEE*

>TRINITY_DN3435_c0_g1_TRINITY_DN3435_c0_g1_i17_g.44356

MNYKHPSSTPRPLQVTFSIGVTLEQCNPEVQKEKSITIRVPGFGSVLLNLEYVCECQCEA

PGFREDNSTKCSGGNGTYACGQCACNEGRYGDFCECSSAFDNLQDQSKCRANNSSKGPA

CSGNGQCICGKCVCNRDSRGRIYGDKCQCSDFSCDEFEEKICGGPERGTCDCGECLCKG

VYTGPNCGEVNCKEVESQCKKDQDPICGGPSKGTCNCGKCLCKNPYSGNYCEECHTCEG

GTCSRVHDCVRCATFDGNPLEDCKKTNRCESVIHSVNTVDDISKYADATTRCDAVDNDD

CTYFFTFKKRLDQKTYNLYLQEEKVCPKKAPVMWIVIGVVLGILLVGLLLLLIFKLLVT

MVDRLEYQKFERDRMTSKWHREKNPIYKEAKSTFENPTYAGGK*

>TRINITY_DN3471_c0_g1_TRINITY_DN3471_c0_g1_i3_g.44573

LCQFPYRCEVVEGVAACTCPKACTRDLAPVCGSDGTTYDNPCLLEVKSCAANNSITIASQ

GACESTEGPRVDECSGVECQYPKQCEVVEGVATCTCPKACTREFAPVCGSDGTTYDNPC

LMEVQACTTNTTIWIKKVGRCEDESKCPVYNPTPVCGSVTARCSSNDDCEPGESCCLDD

KCVRKCVSTVEPPDSLEQCPLFNPTASCGSLEVKCNSSDECAHKAKCCLDGSCVQRCVT

ALDLPKPEEGCPALDPMPLCGSVASSCDGSDDCPSGQQCCLDQVCIRRCVPSIPALPTL

PPGAKTCAELNCADP

>TRINITY_DN3497_c0_g1_TRINITY_DN3497_c0_g1_i5_g.44606

MKVLVLFLAFFVAAISAESRLREKRFFINSFIKKCSQESDCDAGKCCAFGRRCLPKLPQY

ATCHLTGIHKCGCREGLECRVTKEFSILGKKFSLKQCMPVEEPTEVEDVQDEELQDMIA

GDRKRRFLFDRCIQESDCGENRCCLFGKICAKKLPKHFTCYLTNKHKCGCQNGLECQVT

TTIVVPIIGTKIPIRQCVVAGPPAPDA*

>TRINITY_DN3619_c0_g1_TRINITY_DN3619_c0_g1_i1_g.25688

FNIGTTLIAASNASKMEALRILCCFFIVFPCSVLAFPEEENGDENLHEGDIKLSASQQVA

LDLHGDPTAPLAGARGLVKDRMRLWSSLIVPYNISQELDDNPVAKAVILSAMKEWEESS

CLRFVPRTTQRDYLEFFQGSGCWSYVGRQGGMQQISLASGCWRQGTVVHEIGHAMGYWH

EQSRPDRDDFVEIVWENIPDEKKHNFRKYNRTKIDSLGIAYDYLSVMHYSATAFGSGKV

TIKAKDAAVVQLGQRIGLYPSDVRQADLLYKCDGKTTRVPNRPSPPPPPSGPDDCTFEN

GLCGFSNVDGDQFDWTQRMGPTPSSSTGPSLDHTTERFGYFMFIETSSPRIENDTAILQ

SKEYPPGGERCLQFYYHMYGSQMGSLSVTYTDHRVLTNQVLWSRSGDQGNQWQLAKVQL

PSSTTPYRFSFVGVRGSGYRGDASIDDVFFTDGACQ*

>TRINITY_DN37479_c0_g1_TRINITY_DN37479_c0_g1_i6_g.20468

TVEWTRSLLPLPMGRSQQSGGRLKITGVQVQDSGNYTCTASNSMGAINTTTELVVREYYF

NRLDSVILRDHPDYEQTLNEYLEPVRVSERKWKLCYRAFDNGYSAPAFHAACDNKGPTV

TLVRVGDNVFGGYTDKSWGGSIGYISSDKAFLFSLKNRDNKEYKMAI

>TRINITY_DN37649_c0_g1_TRINITY_DN37649_c0_g1_i1_g.49485

MDTWIPIVFALLSAAAHVTNAQDVDGGYTEWSAWTECSVTCGSGTMVRVRQCTNPAPQGN

GRDCGSLGLPEESKICKAKNKCKRRQDVCKVGMDLHVMIDRSRSIPQRVLETVIRRFIP

ALVGKLKPSKKATRVTFSLFSRRAYFHLMNNFKDKSSYQKRSLDKLVSTIPVDERYFTT

RIKHALKGVHKDVFNRKKDRRNKQNVLLILGDGNSHPPVKTLTKLATKLRLKKNCHIVA

VGYGRRGKQDVDALRELAGQNVILVKKRPAIKLASSKLIRKVVRTICAVDGGFNKWTKW

SDCNAQCDTPGVQVHQRYCTRPVPAKRGKVCTGPFYEQRGCMGDPCT*

>TRINITY_DN378_c0_g1_TRINITY_DN378_c0_g1_i4_g.105416

GAEIIELGDGGAVDEGLAGEESRGGGEGGGNDDDEDDEAPGGPKTEEVEEEEWEPPSVQE

LVGEIEGYCQRLRDLAVEPQNCMPDVVIWMICGDKRVAYYRVPAYDVLFSTTPEATGQL

CGKTVELMLKYPGKKGQDIKEHPEVPGLVRLELWLGLQNHQHHWTAREKTEGEFIVYAE

SYENEMKIIKWIGPKGPGSRPRFSDVTGDLELPLDKFHVPPGWKFSSDWQIKPELSLFC

DSDTGHKKFLEEVFENQSRLFPGAEWGPAKEQWTDATGDGSASPDQMKPPSGWAWIMQN

WEVDKNRAVDGDGWEYSLNPSYGVYTPVEKAFHLTRRRRRVRERELKDPGASSAKKQDQ

MRELMKEGWGYAPAFFMKFHMKEKKMDFVRRRRYLRELRPEGGKIDGKQCSLPPLLRVQ

VKGDKAESAICLLPRLFVTFKKPRKFQLWAYMYQARDLIAKDDSGMNDAYARVVFGEES

QKTEILKKNMCPTWDQTLIFTKVDINEDLENITRAPPSVIVELFDNDEMGKDDFLGRCT

MKPLVRLNGVSNPPEPKLLWHPIMRGEKYAGEMLMCSELFLDEGAAIPHPPSLRGGVFP

VADRVRPVMQKKAVEILCWGVRNMKKFQLVKVKSPIVEFEIGGTTFTSEKIKNASKTPN

FPNPVLERKILILPKDEMYAPPINIRVRDDRPFGRKPLVAISSLKSLKKFECKLEPDGE

NELEIEVQAPQASAPPEQPVTGPGQPAPKTPAPAGDKTQVKGSEDQFDWWSKFHASLSG

REASTDRPKAKKAKKLLPLLSSGGEDEDSRDHTQKYLDKGYDTLTVFDRELENLEQFER

LDDFIGTYPLRRGKTKTKDDEDGSCVGEFKGSFRIYPVPDDQVDGSTLPETLFVNLPPS

EPQECTVRVYVVRGVELQPQDPNGLADPYLIVSLGKKKHDEQDNYKPNTLNPMFGKMFE

FKAKIPVVKDLKIKLMDYDLLSRDDLIGETTIDLEQRLLSRYHANCGLPKTYCTSGEHQ

WRDSEKPLKILEKWCEHKGKKMRFFRSKSNSPGRIVIEDRVYTLEEFETEETLLPPEKE

LGPSHQRLALHILRMQGLVPEHIETRSLYSPVQPEIEQGKLQLWVDVFPKSVGNPGYPV

DIAPREASKYELRVIIWNTSGVVLEETSITGDQMSDIYVKGWIGGIDEKQKTDVHYRSL

DGTGNFNWRMVFPFEYLPIEKKLSVKKKKHFWSLDETEEKVPPKLIVQVWDNDTFSHDD

FLGQKEIDLSKIPKPCSDPDKCGTRRDPERHGEFVDLFVQKSIRGWWACWKEGVEKPQG

KLEMTIELVTASQASMKPAGLGQEEPNANPKLDPPNRPETSFLWFANPLKTLRYIIWRK

YKWIILGLLLLLLVVLFIALLLYAMPGYSIKKLFGV*

>TRINITY_DN3867_c1_g1_TRINITY_DN3867_c1_g1_i3_g.4419

MLASRSGADCVSAAPLPELEEELVLSDEPEVFEDPAWKHHGHHGQWGHNAHGYHSGSKVH

HVASKSEAHAAGSAAGGRAGAAAGSGRAQVVAQSAGQAAGHGIGHGVGHGIAHGLGHGT

GHGLAHGLTEGTAHGIAAGMAEGIREGLKAAAHIFHQLKNIYCKKTVHCGGFYLQLK*

>TRINITY_DN394_c5_g1_TRINITY_DN394_c5_g1_i2_g.106159

MIATGKLGDIPVCVVLCSTTLFLSLDFVNGICNSIITFLSILPSDLIKQVIFQFLRNLIT

MLVAKVGGSNFQCQDHQQENEENDQETFVLLPGSTATKECNKSNDNTSSNQQIGACGIV

HFLRQDSIITKLGFCPGTNSNHGNPKGKKEKVKEKDQKLDNSCCSLHFDNQANCCYSLH

NSLATAAVCLIVKMEGAARIVKFLVFFFNFLFFALGIAMIGVGAWAKAKFGDYAVLSQK

VDYATGTNLLIATGVIIALVAFFGCCGAWKENKCFLIIFFILLLVILALEIAAAYFGYK

HRDQISKELKDDLLDEIRGKYGQEGDDGITDAIDKVQREEQCCGAQDYTDWYVSKFTGG

NHSIFPESCCVAEIKDEKDCGVFSSPPTNETAGKQIYTDGCFGILETLVKDRLYAVGAM

AITILVIQILGMIFALVLICQIGKSETYA*

>TRINITY_DN3953_c0_g1_TRINITY_DN3953_c0_g1_i19_g.34087

MAVPPKYDDLGKEARDVFGKGYGFGNVKLDVKTKTDKGVEFNIVGSSNNDTGKVGGSLET

KYKYADYGITFSEKWTTDNILSTDIIVEDQIAKGLKLEFDTTFTPNTGKKTAKVKGAYK

QDHFHSTVDVDFDFAGPTVQASAVAGYEGWVLGYQAAYDTAKSQLIANNFSFGYRSADF

HIHSSVNDGSRFTGAIYHKLAKNLEAAAQLNWASGTSNTSLNVGCKYEVDKDTAFRMKV

NSSSQVGVGYTQTLRPGIKATLSSLIDTKNLNQGGHKLGLTLELEA*

>TRINITY_DN40348_c0_g2_TRINITY_DN40348_c0_g2_i1_g.122660

IGRNCSRCKSGYYGFPNCRKCRCLFCNEITGACDCPPKTVGASCELCILGTYGHDPIIGC

RDCACDRAGVVGGDISCDALTGQCRCRPSHRGRRCDECAPGYHGYPLCNKCDCDARGVT

GNMCDHQTGRCLCKAGVTGER

>TRINITY_DN4046_c0_g1_TRINITY_DN4046_c0_g1_i2_g.34717

MATFAISKEYGYVVLTGISSGFMLSYLAINVGKARKKFKVALPKMYDDKEVVFNCYQRAH

LNTVENYPLFLMLLFLGGLEHPVFSSVAGVVWIISRIVYAHGYYTGDPSKRMRGSFGYL

PLLGLLGCSVKFALHLLGVIGDKVL*

>TRINITY_DN427_c0_g1_TRINITY_DN427_c0_g1_i7_g.9968

MVGSPAGYLKATVYILGPGDPSPSLSQLAGNNDKDDIESNLLRPSGVTLQPALFSLKVFM

AEDLPQMDSGLMKGVKKFFNLAKEDEKLVDPYVVFSFCGKNSQTVTKYKKDCPEFKQIL

KVPFRFPSMCEHLKIQIFDWDRVGDDDCIGTAFLPLSTISSYGDEGFLPTFGPCFITFY

GSVREFSDLPDEYEELNLGQGEGVAYRGRLLVELNTALTEEVGNPVEDLKAEEIIKIQP

YLSRTKYKLFCCLYEANMVSETDGPVEFEVSIGNYGNKMDESVAPANTPPANAVFDGTH

YFYLPWSEDKPCVSVESYWEDITFRLESLNIIHGIIDSLKANRKAVQHLIDHKAPTKDA

VAALFALLDQLITSCRTPLPKKKGRCFNKLDAKIRSDRLYELRAIVEDALKLKDEATDV

TKALMDIDGYLGRLKDLAEEPQNSLPDVIVWMISGSKRIAYYRIPAYKVLFSPTEGASG

KHCAKTMEVMLKYPSDDAKDHPEVPALVRLELWLGLEDYQASWTAREASEGDFCVFAET

YENEVKVGAWTKRLLTRPDFSDASGDIPLNKDDFKAPYGWKFDGTWFINPELSLKFAGD

SGHKTFLEDVFENQSRMIPGGNFGPASVPWTEVHGDEAKGKDELTCPPGWEWTSEWTVD

CNRAVDKDGWEYSVDVSYGAYGSIQKAYHMVRRRRWVRDRELKDPESVEKQKEMETFEK

EGWEYAPVFTAKFHVKERKMDFVRRRRWHCKMVPKQGEEQHLAIPPVCLLEVKDGDQKG

CVRNIPRMFVSFKNPHKFQLWAYIYQARDLLSMDDSGMNDAYARVVFGKNSAVTKTLTQ

QLCPTWNQTLIFENVEIFESLDNLAKYPPSVVVEIFDKDPVDKDDFLGRCVMKPVVRLN

GHELPEPRLQWHKVIKGDEAAGELLMVSELFLDEGAELPFRPAMVEDVFQVRSGVHPKL

QPTAVEILCWGVRSMKKFELTSVTSPSLEFDIGGAIVKTEVIKDTKKKPNFDHPVLQRL

IVNLPIEEIYTPPINIRVRDNRTFGRRPIVGVHSIRSLGRFRCATPQPTDSVDATPTTV

ADEAASVSMTSQEDHVVDIKEKDKKKDKGKEGSRKKDDDDLIDWWSKFYASIGDKEKSE

LYLKKGYETVQVYESELEKQPQFHNFEDFILTFPFRRGRAKSKEEQEDATVGEFKGTFR

VYPLPPDGNIKSLPESVYRNLPSPEPVDCVVRVYVLKAIELHPRDASGLADSYLIVTLG

KEKIDDQDNYIANTINPVYGKMFELQAKIPLAKDLKIQVMDNDKLGRDDLIGETVIDLE

QRILSRFRATCGLPKAFCKSGPNKWRDAEKPKKILEKWCEMNNKSPPTYEGESITVGEQ

TYHLADFEPEDMLKHKHLGKVPQRLALHVLNTKGLVPEHVETRSLYNGRQQREQGKLQL

WVDIFPKEMKPKLPVPISPRVPVDYVLRVIIWNTTDVILEETSITGEKMSDIYVKGWID

GIDESQSTDVHYRSLSGEGNFNWRFVFPFSYLPHDQKLYITEKEHFWSLDQTVQKIAPR

LVVQIWDNDILTDDFLGALELDLTKMPQPATSSRSCKLPVSGKTETISLFDQKNAYGFW

AASTIVEGKVQLRGKLEMTLEVLPESQAKLKPAGEGREDPNKNPTLSEPDRPATSFAWF

SSPFKSLRYIIWRRFKWYILGFLLFLIIFLLVALFFYSAPGYTMKKILGA*

>TRINITY_DN43315_c0_g1_TRINITY_DN43315_c0_g1_i1_g.55509

YEKCHLTVWQETLLIDENDANMSKEKRRRDSRALIGAEDRSLIGSHTRISQYTQSENALK

QRLKDIDHSHRQTNRRISHETRELKQILHGLQKDLKVSRRYVPTQLEERQLEPIRTRRN

TTSSFPGPPEKLTLLNRVLDDSVKSKSKTEAGLPVEVPSIEYLAKRRRSNSMPSMQETR

ELR

>TRINITY_DN4351_c1_g1_TRINITY_DN4351_c1_g1_i4_g.43562

MKHFAKMQKFVLILLVSYLRCCFGQAEKWQAVGCFTDDENHSTLPENFFNPPLHFDDLWP

ELKPLVDECSKAAETKGYDTFGIQFHQECWSGTNASLSYDKHGKSHNCRVGVDGYGVGQ

VYANFVYKRKAVDGGWSTWSNWTACLVTCGGGEQRRMRSCTNPAPEFGGKKCAGLSKET

KQCDAQPCPVDGVWGEWTKWTACHVTCGGGTQQRMRRCSKPLHGGKPCPGHSRETRKCN

TQPCPVHGSWTPWSNVGPCSKSCGNGLQTRVRTCTNPPPSHGGRNCLGPNRSQTNCRIR

SCPAVHRFCCASGITESSGALTINAFTSSMQTTVGLLGDMSAGSASGSQQTAVPSPLTA

LSEVGVAGVGTVT*

>TRINITY_DN4476_c0_g1_TRINITY_DN4476_c0_g1_i1_g.119147

MSLLLGVLVGLLGLSLSDACGNRPFQARVVNGENASPHAWPWQISLRVNGQHICGGSLIA

NDWVVTAAHCVARNPRPSGYTVVVGAHRRTGSTSVQQTFRLRQLFKHEQYDGRRLKNDI

ALLQLSGSISASSKVNTVCLPPSGSQAQAGAQCYITGWGRTVGGGSLPQTLQQAMLPVA

SHSDCSRVNGRLIPVDQRSMICAGGRGKGGCQGDSGGPFVCNEGGRWVLRGAVSWGHSM

CRTDHYTVFARVSNFLGWINQKMSGGGGGGGGGGGASCVDRDRRCSGWTSYCSFHRYVR

ANCRKTCRLC*

>TRINITY_DN45621_c1_g1_TRINITY_DN45621_c1_g1_i1_g.64725

DKARMEKSYTRTPPKGRCLQFWYMMYGQDLGSLNVYKKVGGKLQPIWNITGDQKQGRTWL

KALVTLNSTVDFKVVFEGTRGKGTRSDVAIDDVSVKDGPCPGVGDCNFQSDWCTWRNAP

RGDQFDWIRGSGRTPSSLTG

>TRINITY_DN4669_c5_g2_TRINITY_DN4669_c5_g2_i6_g.99073

MTAMPVVSTVSMVTMMSMVAMMAVVTMVTFVVDVDVPGHRNLHWHSHHLHFRYVNSLHVM

HRHGNGHFPDNRDLDNTVLLDVFGDLNRDPHDLCVVDWHWNFDVSGVVDGNRDLFVLRD

VPSLVYRDMHWYINGLHHRDPPVFSAVHGHLHRVLDVDRDLLVKTIKVPVHIPVHKTRY

VPQIKEVPVPIYHTRHVKIPVPVHHTKVVRVPVKVPEYIQKNRIVKVPVVRKVPVPVPV

HHVKTVNVPEVKVVRVPVKVPVPRYIHVHHKGHHGHH

>TRINITY_DN47019_c0_g1_TRINITY_DN47019_c0_g1_i1_g.76007

GDCERGRKCCFAGCTNKCLKPVMPSKPGQCPVPSSDVQACEVYSTECSVDHDCPNSMKCC

RWQCGRVCSHAVQDKDCDSVVDVGFLLDSSGSISPHDWSAVLHFLKRFIDSFLVAPDGT

RFGVVSYSSQPYVDFRFNTLTGNKLNNGEVKKLVDRIQHQKGYTFIDKALKLADRELFS

AKGGVRSAARKVLFVLTDGSQTINKGPTTPLNEAAQPLKDKGVKIWSIGVGKRANREQL

AEIASRPEDVSQLDDFQSLLDVVENLKEISCKAPSQTKCQKEYHFALRNPVHGGFVPRC

KADGSYEAVQCHGNLCYCVDSGGLKIPGTGTPIEAGKPPCTQAEKLTACQIAHKQALKK

RTLGAFIPMCRADGSYEPVQCHGKTAECWCVGADGREVLGTRSKEAVTCPVQNANLTRC

LRESQEKRRNWILGYRLAPWCLPDG

>TRINITY_DN4778_c0_g2_TRINITY_DN4778_c0_g2_i1_g.1379

MKSLSVGLLVLLSIHFCFGEECAKEAFLDKCGQLVDLIDKFADLDKRFEELEHPKATSCK

ELYDRGEREDKAYELHVGSKTVSVYCHMSAIANCGSGGFTL

>TRINITY_DN49405_c0_g1_TRINITY_DN49405_c0_g1_i4_g.71100

ENVFIQLDLEAEFHFTHLIMTFRSFRPAGMLIERSWDYGRKWQVYQYFAENCAKTFPDIL

KGPAKEIDDVICTEDFSSVEPSTGGEVIFRALNPLIPIENPYSLKVQNLLKLTNIRINL

TKLHNLGDTVLDPTRNEIREKYYYAVYDLVIRGSCSCYGHAEQCLPLSNQTNIPGMVHG

QCNCTHNTEGKNCEKCKTNYNDRPWKPATADDPNECRKCDCHGHATECRFDPAVYESSG

NVSGGVCINCQHNTVGRKCDQCKPLHYQDPKKAFSHPDACLPCNCDPIGGVSGGECEAK

NDPAKGLFAGRCICKKNVNGPRCDTCLNGYWNMRESNPDGCEACGCNPNGIIGRCNPQT

GECTCKRFVEGKFCDRCLAGFWGLGEGASGCLPCDCDPGGAYERNCEQIKGQCRCRKGI

TGRRCGHVKTGNFFPLPDRLIYESETARGIGPSSIVPREPPKERIVSWTGDGFRDVQHG

TILEYAVTNVPYTGQYNVLVRYNAKDSGVWRAVVTVSRTDGKPLSSGQCANASSDVSSG

NFTTVLSPYKRYSLSDQRICMEKGVSYYVRVLHLRDDSNRDGENSLLPDSTVLVPSTNS

GLFEGSNGEKYRNQYETYGCQDYHLAAAFPRPQLSEVCRSLIFSQSSILYDGAVPCNCD

PAGTERDENNTLICDPSGGQCKCKTNVMGQRCDRCAPGSYDFGPSGCKSCECDSVGSSD

NFCNQQTGQCTCVILASGRQCNLCPPRKWGFPECRSCECSNHASSCNPKTGVCINCEHN

TAGNNCENCSHGYYGDPTTGSPTDCKRCQCPGGSSGNQFSKTCYLDQESGRGVVVCDSC

EMGYSGTQCEQCADGYYGNPLVPGGRCQKCFCNMNVDPGVPGNCDRGTGECLGCLYNTA

GFSCERCESGFFGNALIRNCTECTCNNLGTSPGFFDTCNHVTGQCKCQPNVVGTRCDKC

AAGFWNLASGKGCEKCQCCEEGSIHSACDPVEGRCKCKAGYGGATCCECDEFFWGSPAY

SCQPCDCNEAGSIGLQCNRTTGRCQCKAGMVGEKCNQCAPDTSGRMPQCEVCGECYYQW

KDTLEYLSLNATTEIGEIGNVSVSGPINVYSYEKEINELKKKLKKIEIIAESQVTSEKD

TSTIKDELDSAADKIQNVQDRILEIEKELTTIEMQGNVAKAEVRILRERLDNLVRDGKR

LKDDVEKIRSKDIGRAFEDIRKSENISQRAGNVIEDAKAITSESMERRVEINRILAGPP

AFRVQVNFSMLSMDDIQKRIETLLNQLNLLNSIVCGTNQNKCGACGLANCTACGGPGCN

GSLELAKGALLQARSAERAQREREVAANATLEEIQRAEVTVNMTRQEAERALLKAEEAN

QQAINATLTMDELIKDILDFLARKYPDPKKVRALATLVKNLSLSVTEEEIKKLSIDIEK

ALSSLTGIDEILETTARNLTGARNLQKEAEEARERARTLPAVIQSVADALARASEGQRM

AADAIAKAREDIAMAGTFLDKIYPELDGLQQRVSSASRDLAQMRLRVPSVLGHLQENRK

EVAATETLVQQAMNLSQNAKKESGILQDAFNAAKFKIEEKTAVVKNGTARVKSFKEKAN

KLRDRLEYHLTKIIEIENKKITYDALVDELKKEQESMKELVGRIGKCYALYRGCNPQDT

DFKC*

>TRINITY_DN50736_c0_g1_TRINITY_DN50736_c0_g1_i2_g.57328

MAEEASVVPTFFTVNAVEGGEPLGMESGSIPDNNITASSCPDGVTPSMGRLNVGNSWCAG

DDKDCYLQVDCGKLHLVCAVATHGNRAPDSNGDYVKKFKIKHSNDGEHWIVYEEPLEQQ

SGEVSEVQETTADQLGANDDAKRLYEAMKGWGTDESALGEILCTRDNAELAAIRQAYAE

RYNVSLEEALTGELSGNLRTLLVELAKGERDESIEIDAALAESDAKDLLAAGVQAWGTD

EEVFIRVFTQRSLLQLSATFTAYREMGSESISDSLESEMSGHLLTALLTIVNRVQADPV

KFYADQIRKALEEGDWAAVERIVFSRSKIQLDKICTSYLSSYGSELADDVNMMYHGDNK

VALVEKIDQTKVLVQRIFEGNSDSHSVKRNDFKQPVITRFIRFCPLEWHVWPCMSVELY

GAQVIEGGASPPPDDEVVSAEQVEEVETVPEPVEEDIQVVDRRKEIEEEHRKRMEEIEN

RIKEQEEKRKQELEEKRRAEEEERRKMEEERKMREEEAARKREEERRQLEEERLKWEEE

RKKREEEVRQMIEEGRRKREEERKKREDEHRKKREEERKRREEERKARLEEEKRKLEEA

RRKREEEFRSRMENSRNINIDVAVALESPPEEDASTKPVQDDRKKKEEFWTKKVRDPVL

IEQEMKQLRDEERRRLAEERRKKEEEEAERTERELEITGEWRAKMEDTRPERLDEKWVI

EYRLKAMEDERRRREEELLKKEEDERRKRQKQEDERLKALAELAKKTDEQRELFRKQRE

EEERKRWEEEEARKNEEEKRRKWLLEERGRRMNEERRKREEEADLWRREMERKKALEEE

ENKRKEEEERIKQQIVDRKRLEDIERKGLEAERRRKREEEQRRRDEDEMRKREEREKLR

KKQLEKRMSGEMVRRKSEEDLREREKREEIWGQQMAKRHSKTFENKMVFITGSPQKGQD

TEEVFAQEVSMVMATPVVDDEPQTTVSTKRTVTVRTITTTVTDTRDNHLPTANDTNGEP

KTYIVDGIFHDHVGDHRDHGHGHHDHDHHGHHHDHHGHHHDHHGHH

>TRINITY_DN5091_c0_g1_TRINITY_DN5091_c0_g1_i10_g.109191

MNQPIAPTLPGIESFLKEVLGNEPLSSEAERQRLEFLRRLESISLPPSLPPRPPDLGLRR

RLAQQQETSTTGSQADESAYKNESFDPVDFASKQRDLARSRIYSTRRELNVNDSTGRVV

ETVPVESRHSISSYEDDIYEHLLCDTKVSSSPQAADADGKAEDASLWSSGGAPLRSSGG

KGKLWFTKRETKNPTDIYASDLLNPSIKGFLKDIKTNKRRWCVIHHEHFYIFKNSEDPA

MQIIDLPSCEIGVDDKKKISYSFKLSPAGGTSVSLAIEDGQDLSPWMSAIMAAAVRRGT

GFRPTSPLENAFSLRQPQERDTFAFSRERKTSEVDMEEEDGTLESFYECPSDLMSESPS

PVKVRSHSTPVPPSPSMETTEGYFAPLPPLPIESVEPVVVASSSDSSDDEYDDEEEDDD

DMEEKEEEKKKGKKEKIYDEIPKDLLKELTQEQRRVALGEENSSSLGDESQSEHSTTNS

NRQSYTDMLASDDTGTGSSQGENCRKRASTALSTGSVDSDGEASKLSQKPSFAKPLAPK

VKRRRKQPPIREARLKFFQDSTATYCGVLYQKRKQGVWSKRYCKIVKNWLKGFRHPGDE

EPCLDLPVVGYDFTLIDSKESNKNYAFKMGHPSRNTLLFATNSRQAVGKWIEMLSLAAT

GQNILAPYPPYFKPAVAKARSHESLGSSEGVQSEGDSGDPPPVLPRDYPLDSGMEGSQD

SARMEEDPQTADQHDGKPNSHRKEVPGSPSSSLERGKASPSSYSAAKERALKRRKEKQA

EGDSGRDTPSTMSPPHSLYIGENADGGVHPEPNDEHAGPVYENVPKVSQDDSSVGKKDR

SWVEAFKRKPGKLVRGYTSIGFETSKKYPNSVRKKGDQGFSHLLTLFDKEGRFCGYLIE

VKASKFSTTHVRRWCVVKNGSMHMYHRQADEKPEATLSLVDMWLTDESNAEKTKLAFKL

HAKDGRAFLFQASGKEDFDRWMGVLQLFTALRLERRPSSEKEPLRKADSSGAEEVEHYF

ERGTVRSKSTRAGNRVKDEGSPPGKPKASLRSKISQRVNVMDIFKKGHNFYDMENLPAE

GSYVNTVGYHSGTLTEVTDAVGLKGKTRWCAVREHEFLVYSDGKAPDPLRRFPLRKSRI

ENVTNPESSWHWFQVRCGLDTIVLATRHQADFDKWMKMLVTAREESNPVEENATCVGKL

PSAGLGGILHKRTKSETLSQKFMSPPPTGCYTPADERVSSVSMTTQVPETTDVLISGFL

TEMLGDARVIRWCLVTSERFSVYNDKNSGDAKIDWPLVDITMKEGGADADGRPSFVLYH

GNQVKRYQHHEPAVVTQWTSVFSRYCRPMTDSGRVMSVESLPSERLKDNRKSASFSDVK

MPTEEQNKTKEVLSEGRASGKKAARRVSEDSSLFKRLSRPDLFKAPWRASTEKLNVKLR

EKSTRRQKDDVDRRYSCGNLFDSEGRFCGHLMEVTATQLCMSEVRRWCQLRGDDLYIYE

HELASRPRALLPLINSRVVDQSDFERGVYRFRLESEGGKHATFSALTRSDFEKWTTVIS

VKSAVLLDRNERVRRTRSMILEDTLSVRSPSSDFSSLTEAEEPKQADKETTSKPSHPSL

TTFPSVSSDDSVFLRMADGDVTSPLSNCVVTDQTSEEPAFLVAEEVSGVERCRASDETL

ASDSRTPVAEYAETVTRLVSEGDESSETTRSQNPEQGGDGVETAKEEVVSVATPDSDDP

EESTGGVLGSSKAEGCLAESEVAEPDEEGLDKSRANGGRVEESEVDEEGLGESQLEELS

ALYDNFVAFAAALNDWYQGEKKSRPKEVAEALYENIPFAYEELLRERETKNELDAGKGS

GTSAESVQGSLGHTPSTVAWKFGKMHLQDGALSSPLYESVPETIGSTREKSEEIGSIRA

ESREGGFTRTEEAGINRKESDNVGSIREGSEALDSIRPYSGLYGEAELEELESVKEKSD

TPNSLNCEDDKRNAESIPTVPDDDSSGERTPTKLDSGESSKLSDDDESAGFGSSKRVET

RKETRSGPENGGATKWTESGGSNKAADDASDVNQTDSTVGHVSAADDSSAQTHCGEPLV

RSNGDAREHSADDEGSRLHSGEVEVGRRHSGEVEVGRRHSGEVGVGRRHSGEVEVGRRH

SGEVGGGRLHSSNSDEGGHDTYFGAEESRIADENTKDSSPSDQTQDGEQKTESTSDENV

LSKSQADLLKAFNEILELHGPESGDEDTKF*

>TRINITY_DN5092_c0_g1_TRINITY_DN5092_c0_g1_i1_g.108622

MLFKTASLLFLFPLVFSHDSDQCAKKVHDVEDFLHDKMKKLDSKVDNVLKKFNRILLTET

ELNRKLEKINAKLIPITEELTQCIKRTSFAPVGIPHKDCALGMQSGLIEDSAITATSSY

KTDDWTWLPSGGRLFKKDDFKQKIIGGWCPADTEGQMYLQIELEIPRKITHVATQGRFN

FDVYTKSFMLSYSQDGENFTVYQEGGLDKEFTTSRTSGDTLVYSSIRTPFTARFIRFLP

ITWKQSPCMRVEIYSCGRE*

>TRINITY_DN5096_c0_g1_TRINITY_DN5096_c0_g1_i2_g.108692

SSSSSDSKKEEKKGEEEENKGEEEEEKKEEEEEKEKEAPKEKEEDEAAKQDDMLEISEVT

TIVKTEPLEEGESSTKVFSQTRTVVSESHSYTKQTSGSEEVPDLSELTLDAATSETTSY

SVSSSRVVTQKTVITSSSTSEHVITSEGLAIENGDMEQVEQTAS*

>TRINITY_DN5258_c0_g1_TRINITY_DN5258_c0_g1_i1_g.42145

MAELSADDYHLDRPLYYACRDDRERFCRDVASGEGKVYKCLMKHKFEATMSEECRDKLTI

RQKIQAKDVKADFTFFQSCKKDYRKYEDKYDCGKGKTMHGMLANVLLCLEAALNDGKSI

DGKCQAELLDVRQQLMEDFSINPEVVRDCEREINDHCLKGTEKEGKTIDCLMRLGEEKK

LGKKCYKAVASLLKETGAGGDYRIDRTLYVACEPVVQTACKEKGQKDGDIMVLSCLMEN

MNTDHMVPECREQLLHLEFFLARDFRLDPQLYRVCKDDAEKICHAPDWKETDDVPTNMI

VSCLYRNSKPEIEEDRRVSRKCAAHVKRAMHLRAEDIHLMPEVQDECIADLGSFCGSKL

EKGEELECLQDHYDELQEKCKKAVGMFTEEEGEDYELDRKLVHACSGMVSKFCQDAVQT

GAAEDVLPCLVENKNDASMDSKCHAAIEHWQLTEMKDFKFSDKFKKACRDDVQMFCANQ

ATKKHEIIKCLSKQVRDAVLKDQDHTISENCRKQLRIEKFQEAENIKFDPDVYGKCKAD

VKNYCSNVTPGSAKVYECLKDHRHKLSTECYDQLFKREKMEAEHPDLDYRLVKVCKRMI

KFFCKDSPPNEILKCLKSNKNAPEMEDSCREVITKRQIMKAEDIMLNPSVVVACHRDMP

KFCGDVTHGGFGKIISCLKKHYTDLSDECAEHIRTMMEAASKDYRLDARLKNVCQTEVE

TLCKDIDPGHGKVEECLREKIAEIKNKDCRTEVARTMREGRFDVKADLMLYKACAHDIN

RHCIDVPFGHGQVMRCLLDVHKKNAQGNKLDKECYMHLSARLKMWEAAAKIVPMESLGD

IAMAISQSPSKNYFFIVFATVLALIFLGGLVFGRLSKRVKREMKDR*

>TRINITY_DN532_c0_g1_TRINITY_DN532_c0_g1_i1_g.82036

SKSTFIVGRKIISQIMGLALRPLVLLFIFVGSVSGGCRQADWQVVLDRGNVWATCNANEY

IKGLWRHDNGGANDERLGRIEFANCCSPPASYGKPNADCLNANWWSIFDRNNVWALCPS

GRYMQGIYKTNDKWLHNLEEGKCCKPPGHPNNWGHCYDHDVGLSFDRRGWSNCNDGYYL

VGLWRGGCDKLYCIEKFRCCKMQEKPTNGGWSPFGAWGACSKHCGGGTQSRSRTCTNPP

PAHGGAQCSGPSSESRPCNRESCIVNGGWTDYGAWGKCSKPCGGGLQERRRTCTNPPPE

NGGAECSGCDKDVRLCNTEPCRAVNGGWSDWSAYGECSKTCGNGKQYKTRTCTNPPPSN

GGKDCKGKAKKGKKCNKGRCPH*

>TRINITY_DN53897_c0_g1_TRINITY_DN53897_c0_g1_i5_g.21877

MASCGMKCLKFMLCAFNLVFWAAGIAVMAVGIYARISAKDYASLTGDTGFQTAANIMIAA

GALVMIIGFIGCCGAIKENKWLLLMYAFLLFLIFVLEIASGILAYSRRDEVISKIEKTV

KKAVEEEYGQADKENLKKAVDNAQQKLECCGVESPSDWKNSTFNKVPDSCCKKNRV*

>TRINITY_DN5654_c0_g1_TRINITY_DN5654_c0_g1_i1_g.322

DNCDKCVDGYYGNPTQGNPDDCKPCPCKFGSRCILVGSRVVCTDCPEGHAGNLCESCQDG

YYGDPSGLLGSPTRCQKCNCSGNIDLNAIGNCNTQTGECLKCIHDTRNGPLERCEECAV

GFYGNATDYPKPQCKACECYSPGTQTPVGHNPRDPLPCDDRAVCQCLPFVIGNKCDSCV

EEYWNVGSGRGCEACECDGVGSLHNVCDVRTGQCVCKPGVTSRACNQCKPDHYLFTDQG

CQPCNCNTEGALNVSCNEFGACVCKPGVLGIKCDSCPENQHNLTAGCIACPPCYDEIQR

IVNEVRHKLRLLITIKNNFNKSSSKIVIDRDFATRLEKLTDDVEKLLDKAEHTRETDEL

LQRQIKDLLTRLEEVHRALVDMTTKTAATQLVVKYGASNVTEAELSLERSREALDRAEM

LLRTDGAKALNDSILAANTTGQYAERMQEIKEEAHDFATMHERDANRILKVAQEVDEKS

KDALNLTNQAVSVQQQSAIDIEKLKRYLESVEELQVKVSNNATRSKVLSQEALDEANIL

LANGTAPLPDLGIKELQGKINNSKLEVTDADQRAQEILAELEYLVSDFNTKEEDVRDKM

ARWPGLLDKLRGLLENVTEANKTAHDAITRGENTLKKAQEMLETLQKFNEIIDKSRREA

VEAESNIPEIRRLIDSANMKTDSANDTIGKAREMASEAEMTSNKAKETAQRVQESANQI

KTDASNLQIPTDNLTKPVKEASDRLDSFNATAQRQTEAIARAKNSSKTAIKASQSAREK

VEEVLRKLNDLLSEIDNLNLIDEDKLTDLENHLNNETYMLRVQDRDIQNLETEHEVIHT

RIEQYRLDLERLKKERSILQKNFDSLPKRCPKQSNPGEGAGGGTGP*

>TRINITY_DN652_c1_g2_TRINITY_DN652_c1_g2_i3_g.37071

MKVVLFLALVAIPAALSIKCYMCTNCDGKGDEKDCGSSFDKCLKVYGKSGDKEATSRSCA

NQALCDAAKATCDAAKKLDSDAVCEAPCCDSDLCNAGAAPTFSVLLVSLCSLFAVVPFF

K*

>TRINITY_DN66169_c0_g1_TRINITY_DN66169_c0_g1_i1_g.14665

IDLAFAVSASGRNSDVAFQLMKETIKRIAEDNQGQDIQFSLILFGEEADTKIFFAERVNV

TALKASVNRLVKAVGESSLESGLAEARREFKRSGVRADAAKVLVVLVDKSEGVGEKEVV

AAAEGLTRIGVRVIVVALGEQADGAELEKVTTRKENVVEAGIDEDEKKLGEDIMDAVLS

EERVVPEIELAFAISATGAEADEAYRLMQDTLKSLVDEYGSSQIHYSVIVYGSSVEQKI

GFDVKFSDDEALKESIGKMSRASGSPALVDTLEEAKKLFESSNLRANAIKVFVVIADRT

SGRSIEDIRSAGRGLERTGIRVIAVSVGKETDPEKLKSASWDDSVISSPVRGKPKQLGE

EIMAKILEDKP

>TRINITY_DN66169_c0_g2_TRINITY_DN66169_c0_g2_i1_g.14672

MKDTMRAIIDKYGMGRVRYGLILFGDSASIKVNFRDGFKIEQLKQFIEISVKEPSGAALD

KALEEAKKMFTGPGVRGEARKVLVVITDKGSGRSPSDIREAAGELREEQVDIVVLSIGE

ESDKDELESMYPLGVVSEKKDSHPEDVADAVMKVVLEGGTQSVKIDLAFAVSASGRNSD

VAFQLMKETIKRIAEDNQGQDIQFSLILFGEEAETEISFGERVNVTALK

>TRINITY_DN6745_c0_g1_TRINITY_DN6745_c0_g1_i1_g.29670

MCSFEAPDICGYKKAPDLKYKLPWLRASGSTTSIGTGPRFDHTYGTLYGHYMYMEVSGNF

KQGDSGGLLSPRFPSTKGSCLQFYYHMYGDHIGTLNVYVKTGFWSSRKVWSKSGNQTNS

WNIANVNVKSSFSYQILFEGVRGSSYRGDIAIDDVRIMDGDCPLPGDCSFEKGMCTWTN

TQQLGDKFDWTMGSGSTTSGLTGPSVDHTTGTTKGQYIFIETSSPRVVGDNAFVLSERF

DPTTGSGRCMKFWHHMYGSTIGTLNVHLTTGNFSGKTLLWQRKGNQLDQWHLGQIRIQS

SVQYQIVFEGIRGRSFTGDISFDDIAFTVGGQGCSLLPPDARPPGQTTTPPILTTAAVT

SPPVNLGNDCNFEPGFCVWKSDARGKFNWTRHQGNTASQGTGPKYDHTYGTGQGYYVYI

ETSSPRKPNDTAILYSPSIPRLSSSSVCLIFWYHMFGPHVDSLNVYVKEGNQAKNLVWR

RSGSQADEWKQGLVQLSPSSSYVVSFEGVRGASYQGDIALDDISFKANTCPPLGECSFE

YQVGNNGAQCGWTNSGSDKFDWTRANGATSSVQTGPQNDHTYGTAQGYYMYIETSSPRK

KGDNALFVSPSYRPTSGSCFQFWYHMYGKDIGTLNVYLRKGNGKLPGARLWTRTGDRGN

VWRIAQVTVSSASGYNVVIEGIAGASYRGDIAIDDVALKNGSCPLPGDCDFENGMCTYT

NVLKGDVFDWLRNSGNTPSWRTGPSKDHTTGTSKGHYAYIETSSPRKQGDVARLISEEF

PPVSARPRCLTFWYHMYGSTVGTLRIITKTGPGNQSETAIWELSGNFGDVWLNGQVPLH

ASKWYSIVFEGVTGRSVTGDIAIDDIVYTNTWCNILPSIAVPPTPPPTTPPP

>TRINITY_DN6761_c0_g1_TRINITY_DN6761_c0_g1_i18_g.29882

MLEASVKEFSRVEEQVSTAESLTIPYVWGIYDLLVLPPSFPYGGMENPCLTFVTPTLLAG

DQSLINVIAHEIAHSWTGNLVTNKTWEHFWLNEGFTVYFERMIVAKMDGKTPEEQSQIR

DFAFIGGWKALKEAVAQFGADHPFTCLVVNLKNIDPDDSFSTVPYEKGSCFLYYLESLV

GGPTAFQPFLRDYLKNFEYKSLTTDEWKAYFEGYFHDKADVLKTVDWDTWLYKPGMPPV

NMLEKYDKTLQVPCTELCSRWVKAKEEDLPSFSEEDIADFLPSQVIEFLALTLQENPLP

VSHLGRMDEVYKFDETHNSEYKYRWCLQCCRSEYQKYYPSVTKFITVQGRMKFIRPIYQ

EMNRHESSKQLAIDTFEAHRSFYHPIAAQQIAKDLGLE*

>TRINITY_DN6821_c4_g2_TRINITY_DN6821_c4_g2_i4_g.56940

KHVPVIKKVPVHITRNKYIKYPVHITHTKYEKYPVRVPVPVVRTHYVKTNVYKKEPYPFH

ITHVKYNRVPVVKYVKEVQKVHVNKYIHHKGHSHGPKYY*

>TRINITY_DN691_c1_g1_TRINITY_DN691_c1_g1_i1_g.36824

MSAEDSEFVQLARIAEQAERYEDMVEYMIKVIKVTKKGQLLSNEERNLLSVAYKNVVGGH

RSSWRVLTSILDKEKEKENNQVAISQVEAYKKKIEGELNAKCDEVLELLENELLTSPTD

APAKVFYCKMKGDYNRYKVEVADEQNPEQREKLVQESDNAYKQAQDACKEIESKMDPIC

LGLALNYSVFYYEIAKKPEKACALAKKAFEDALEELQQNQDSSNSKDSTLIMQLLQDNL

TLWSSCDDE*

>TRINITY_DN70_c0_g1_TRINITY_DN70_c0_g1_i3_g.3376

SFVRGYHSDSYPFDGPGGTLAHAFYPHNNKGLSGDAHFDDDERFTTGTSDGINLDWVAVH

EFGHSLGLHHSNVRESIMYPWYKGFFPNIKLTYDDIQGIQALYGKPLPTTAGPTTNEPT

TVPGSPTPEEPTTTLAPTSSTEAPGADICSARWDAASERSDGRVYVFSNDFFWVLSPSL

KVELGPSSISSRWKEIPSPIDEAYARTDGKIVFFSGKQYWVYNQDDTQERGPKPISDFG

LPDYVDRIDAAFVYGGNKKTYFFWVDRYWRYDQEKTAIDPGYPRSINVWGKELASKPGT

VMTWPGNGATYFFYGSYYYKILAGSKLSVAPNYPKNSGVAWANCKA*

>TRINITY_DN765_c0_g1_TRINITY_DN765_c0_g1_i1_g.110428

MAEAAIAAAEVAAEAVAETVAEAAAESAAEAAAESAAEAAAEAAAEEAAEAAAESAAEVA

AEEAAETAAEEAAEEAAEEAAEEAASSSLVGKAVKITVMVTVGLGVASVVDLIKSDTGA

GQKKCPMEQDTRNKLDLVLNALNGISGVISGWNQVLKSLPQDTDLGTIQVDVSGSKKDV

SVSALFWEVFSGVQKDFKSAQKVSSSCSENCEWKANLQVFTLKIVNAVSGMLAICDLRK

QSPKLQKHNIPASGDEATIEGILQKDFPDWKELIDQQAKRKVNKLAVKEASSAATNAVL

PIVKVPIQTETMARVKKDVMPGIVHNAKDSGKRAAKKVFDHRRGHIMAISLIPFYGWGK

AVQLISDASRDAKRDARNAAQASATAAFASPQVQAQIKTITDQVSQEVFAQHKAEVNST

ISEAVDKVLSKYRA*

>TRINITY_DN7752_c0_g1_TRINITY_DN7752_c0_g1_i13_g.56137

MKIFLFLLLVLYALVTVDCARCVGTKQGICTRLEACQKKGDTLSDEVDKLDEQVKDLSDK

NKELESDLSACDNKVENLKKEIEGKKPGARNCKELLAAGKTTSGVYNVNPDGQGAFDVY

CDQTTGGGGYAVIQRRKDGSVDFYRDWDDYLEGFGDLSGEFWLGLEKIHRLTNVDCGNE

LRVDLSDWNGNSAQAVYEGFRVAGAVDLYRMNLDAFVGGTAGDSLTNHKGMAFSTRDRD

HDKSGSNCAVTYKGAWWYNGCHQSNLNGQYKEGGAHSTYADGINWKTWKGYKYSAKTST

MRIKPL*

>TRINITY_DN7_c0_g1_TRINITY_DN7_c0_g1_i2_g.2452

MKDKESTGLSQVDVAFLRAARAGNLEKVLNFLNEKGDIHTCNANGLNALHLAAKEGHVHV

VAELLNRGAAVNATTKKGNTALHIASLAGQKGSVDVLLENGASVNAKAQNGFTPLYMAC

QEGHVEVIRVLLSHGANQQVPTEDGFTPLDVAVQQGHDKVVAALLHHDSRKGYRSLHTA

ARKDYAKAAKLLLQKNHPPDVEAPNGFTPLHIACKYGNQSVGLVLIDGGATIDYKTKNY

IIVPLHVAAKYGHVHMVTLLVEKGSKVDIPNKDGLTPLHCGARDGHDRVVEYLLDKNGS

VTARTKHGLTPLHMATQGSHVSTSAILLDHKAPVNAVAANGLTPLHIAAHYGHVDIAQL

LLDRNADTDARARNGFTPLHVACKKNREPVILLLLKYGANVHSANEGGQTPMHVATYYG

NVTLVLLLLEHGGSPDITNMRGETALHIACRRREIAIVRLLLRNGAAVDAKTQDRETPL

HIAVRTKNTELVNLLLDHGASPDVIDKNKCTPLHTAARDGNEEIVEILLEHEASLTALS

KKGFTPLHEAARYGHVRVVEMLLKYYETPDPEGKHGLTPLHVATHYDHSDVATLLLNNG

ADKDAKAKNGYSPLHIGGSKNRIAISLLLLNRGVDPDTVTKTGISPLHLAAKEGHVDLC

EQLIEHGAFPGITTNNGLTSLHLAARENRVDVAKLLLKYNAPIDAQTVSGFTPLLIACV

YGNYEVAELLLQNGANVEAQTNKGYQPLHLAAQYGHELIIHLLLKYNAPPDAYTKDGYT

ALYIARRVMKNTTIIETLTKVTKVQQIITLIKQPGEEDQEPLEGEAIVFSAEPEELEEE

EEVLEALELHEEEAEPQVADESIDRYMTMDEMDMGDDSKGNRDSGLFARYSGSFLDKTP

LGGSQSSDLDKQENIVISDVSENIVMTEMTEVESSFDPNSDLPSSLANMSADNVMSYEP

PITGGFLISFVVDARGGKMESSQTGIKIVLPPKSCQMPSRITCKLHRLNKPTLLPPLKE

GEALASRVLDVGPTGLRFLQPIYLELPHFAALRDGERELVVVRTEDGGWNWQEVSVEDM

QGVNGYSGDMNEGYLPSKRYSRIVTPDFPERFAVISRLKKEAFSVGARGLVMKSSVVPQ

VQVSVPEGAVTKDTDVTMQVLPVDESFNDMEEFLAVSSVVTLEPLSLAFKKPVQVTIPC

PLHSGSHEGDMQPSLRLLCCFPEEGKPNRANAANYQWRDITDSTPLTVMNECARFSTSQ

PARYWLIETRNVENVTSDARLLYRKLSAVPYLAKFVVYAKVSLDGQEVRLRVFCITDDK

TEKTLEGQTGYVEIARSRDVEVCEGRPIYIKCLGNLAPVQREPLQLNVTAFHENRLSLN

LKVVDSSQPLTCRMAFLKEPRKDRQGNVHAICNLNIDASEESLKKADAAHRLPDSLLAL

VGQEVGDDWVALGQQVGFEDIELQEISDSREGVPHQCATEVLTKWRDKNESGANMASLE

EALRGMGREDIADNFKKLAYASYAKDVGITVIEKRSGDSGDSEQASGEADNKRISEFLA

AANGGDVMFGSGSPGPGDEAFSVEARPDSPTEEAKDLEGPERDKIIQEMFANDKGVLDF

FSSDAHPDGETEI*

>TRINITY_DN8052_c0_g1_TRINITY_DN8052_c0_g1_i11_g.40142

MPFGLCGKQNVTEEIQVSVELLDQSILQVVLSRDAKGLECLEKVAEKLGITEKSYFGLQY

VTKQGRDWWLVLDKPVSKQLERHRRNGCHDILLKFRVYFFVSDFNQLHDEVTRYQYYLQ

LKAYILERRLSCDEETAILLASYSAQAEFGDLDQGQQINYLKDYVLLPENLIFGLSEDE

LNQKIIDQYKHHRGMTSLQAEAEYIKVVQKLEGYGDEYYPVKDKDGILLLLGASFIGIV

VRHPHGLPPVYFRWPDIMRISHSKKYFNIETTKTLDTIQFEMEDPPTAKYAWKMFVLHH

QFCRLNMTSAPGEATRSRSPTPKLMAKERTVTLNRRSKKEGSQEDMLTVVDGCSESTLS

LPGSTGMINPVYSEGDDETNPKQSPSGDSSVVARTNGDVPLSANRPFPAETFGEPSSRP

VSLSLRETRPPRESIDANRPASADLSIPPNYPHSSSFSESPNKNEFLVRSSRSSDLSVS

PTSPKNDGQEFGKDCALEGEVSAAAAAGSLLSVDSGIPHGGADISYRTRSFESLDGGQS

GRNSAMASMESIPVSQQRPVRPTSLNLEGTADDVSVVTGPTSGYSTSTDSGLDERRDEL

DELEQEEQLSREEQLQALEKVLTDGQGFTEFQKIEMKLESRPVTTAEQQVNANKNRYKD

VLPYEETRVHLNAKHNASNSDYINASHIKMKVGSRQYSYIAAQGPTDQTTPDFWQMIWE

HGVKVVVMATEDNARTDPKNSCHRYWPDDEQGATTTFGSFRIRTEDVRDASPYKVRCWQ

VEHVPSKTRRTVHHLQFTAWPDHGVPKDSSEFLEFLEELESLRQRGKNGAGHHQEPAPL

VVHCTAGVGRTGVILLSDLVIACLQNNQRINIPRTLIRLRRQRMLLVANYGQYRFVYAT

VVQYIKSSRLI*

>TRINITY_DN822_c0_g1_TRINITY_DN822_c0_g1_i19_g.15957

MKLFLLLLACFLLGVSQATTACGPGADIAIVVDKSMSIGEDNFKIVRRFLAKFVDNFQVS

RDGDHIALLTFNEWVKVIFPLTKYMTKGSMKGAIWSIPTKLDWETRTDRALRKVERSIF

TKEGGDRPDRPNYVILFTDGKPYAVHMSDLEDVGEIASRLEKNGVTVIAVGYGKKIDTT

TLKKLAGANGHHYLMEDVSELEKNIIPIMASFCDGGYTDWSDWEKCSVTCGGGVKTRSR

TCTNPPPVHGGKHCDELGPASDEEACNEKPCATPCKTAIDLGIIADVSKSVGNENLQTL

KQALKMLVDKFEPSAEGTHLGLITFAQDAELHFTFADSQYQNSDAAEAKIDQISHLHHQ

TRTDKALIMANGELFTEAGGDRPKKPNVLLVFTDGKPTPKPGYKGFDVTVPPLVVSSLQ

MFQSTCSCR*

>TRINITY_DN822_c0_g1_TRINITY_DN822_c0_g1_i3_g.15966

IMSSFCAVDGGYTDWSDWGECSVTCGGGVKKLKSIERSPADRNLSTVVIRNTMIRNLLAL

LAFVATADQSQQIEVVSRPYFTLGCFKDTSNRAIPTLEGKDPILDGSYTARKNAIQKCY

QAALKRGYRVFAVQNGGWCASGPTAQLTYKKYGPSQACRSDGEGGGWANQVYQIKGGAS

CDPGADIAIIIDKSLSLSQSDFKTVRAFVAKFVNRLRVSPDGDHIALLTFNKWVAVRFQ

LTNPNKEALGRAIWQMDTTLALETRTDRALRRVETDIFTPQGGDRANRPNYVIIFTDGR

PWARDVSVSTLKITTSKIASRLREKGVKIIAIGFGRKIDMATLEMMSGPKGQTILMESA

NKLEENLPKIMSSFCAVDGGYTDWSDWGECSVTCGGGVKTRSRTCTNPPPAHGGKNCAE

LGPASQEEACNKETCPPPCKAALDLGIIADVSKSVGKQNLPKLKHALESLVDKFQPSVD

GTHVGLITFAENAELHFKFADSEYQNPDAAKGKIEEINKLYYQTRTDKALIMANEQLFT

KAGGDRPDKPNVLLVFTDGKPASASLSFDITVPPLVAKGVKITAIGIGRGIKKDVLQEI

AAGNAENVILVDDFDKLQDDLDEIKKMSCGS*

>TRINITY_DN8524_c0_g1_TRINITY_DN8524_c0_g1_i1_g.28131

DGCSAGGVCEKQDDGRLRCECRAGFSGVDCSTENQCEMDSNMGVSDKLLSSTLHAVKNNL

VDWTGDVASRTACVNYLEILDSSCSFSNTTLNQQECERQCRPGETDQVCAKLWDPFSFN

LKPSTTSRYVYNKVTMVCEHVQYLGCLGSGNHFGSLNECENACTLVAPDLKAPGTCFVA

GNGHYHTFDDTSYDF

>TRINITY_DN8568_c0_g1_TRINITY_DN8568_c0_g1_i3_g.28233

TPPPIVNNCTFESGLCSWTNLKGDQFDWSRSRGGTASWNTGPVVDHTLGTKQGYYVYIET

SYPRKPNDKAWLQSGQIQPTSGSSGKCLKFWFHMWGDHVNRLNVYTKIGSAMNRIWTRR

GTQGNKWRYAQLSLISNQPFYVIFEGVRGVDYMGDIALDDLDVADGACPAATQCDYEND

MCGWTNVKGDDFDWSRDSAGTPSLGTGPTTDHTTGTRNGYYLYIETSSPRKPGDKAHLL

SPKYPPTKGKCLNFFYHMMGRDIGQLNIYVKSGLSLGQLVFNETGDQGKYWLHGRANIV

SANSYQIVLEGIRGNSWQGDIAIDDLWIEDQACPPPGSCDFEQNSFCTWLNVPNANRSV

GLDDFDWTLGSGGTPSWQTGPSVDHTTGTSVGTYAFIETSGPNRKKGEIARIKSKMMSG

TTGMCLSWWFHMYGSTVASLNVYLLQTGKPESLVWNLNGSQGNVWRKAEVTIASRSRYN

VIFEGVRGTSYTGDIAIDDLLFTDGNCVGLCSSVNPNQRVLCGSFGINQAQCQNRGCCW

DSAVPNVPFCFYHPSACSSVKPASRKQCGYNGISAVRCRSWGCCWDSATPNAPMCFFGP

QVPTPFPTTPPLPTTQAPSMWDCTFESGLCNWNNSQEDQFDWYRQQGSTGSTNTGPDAD

HTLGSLKGYYVYIETSWQSPNDTAVLLSPTVPATTSKPQKMVCLRFYYHMYGQHVDKLN

LYMQTGQQLPQAPVWTKAGGQSNKWRLAQVEMTSARPFRIAFQGTRGVGYQGDIALDDI

SLTDGSCPLLPECEFEDPNICGYVQSQGDIFDWTRGSGNTTSRWTGPSADHTYGTAFGH

YMYIETSAPRKPGDYARLESPAFDKTDGNGKCLVFWYHMYGSGIGRLNIYLKRGSQLGQ

PVWSDTGNQGKNWHRVMTTVKSPYTQWKVVFEGIRGRSYRGDIAIDDVSVQNGPCPAAG

SCD

>TRINITY_DN870_c0_g1_TRINITY_DN870_c0_g1_i1_g.15228

MSYPPPYGGGYPPASQGYPPPAGGGYPPAPGGYPPPAGGYPPPQPGYPPAGGYPPMGTPA

GYPPVGGPAAPGYPPPTGYPPAPTGYPMASGYPPPPSQPPAPGGYPQASTYPTGTWAPP

PTGGYPAPGMPPAGQYPQQQPSQQQYQQPPQQNYGYQQGNFQSSAPPQVHASQAPAQAH

PKPKQPSGAPEAPAPVGAAVAQMASMSLKQKYGHPVIVPISPFDAEAICEQLRKAMRGA

GTDEQALIDLLVKCSNSQRVEVRKRYKTMFGKDLMNDLKSELSGNLEECLLAMMEPTAL

YDAKCLRRAMRGAGTDEESLIDILCTRTNQEITAIKQAYKDYYHRDLEKDCVSETSGHF

KRLLVSMCQGNRDESDTVDMEKAKKEAMDLFQAGEKKWGTDESRFNVVLASRSFNQLRA

TFDEYIKISQRDILNSIDREMSGDLKAGFKCIVQCARNPSVYFADRLWKSMKGAGTDDA

TLIRVVVSRSEVDLVEIKQSFLQKYHKTLYKMIQGDCSGDYKKLLQAIVGMN*

>TRINITY_DN89140_c0_g1_TRINITY_DN89140_c0_g1_i1_g.47212

VPESRDPCSENTCSLERGQICVVSAANRAICDCPPKCFNQKVGYVCGSDGFDYKNYCELK

RTACLLGRKITVTHKGRCGSAAQVPTDPPPTTDVQHGDDTPSRCMMRVKPGNCSTPVVR

WGYDYDLKKCRPFAYFSCNGN

>TRINITY_DN892_c0_g1_TRINITY_DN892_c0_g1_i1_g.15992

MGLQYLWGCGLMLLVGALASHAELLGYPHEGCYSDWKIQRDIEEDYSVISMRSKEAIETC

FSWAKRKRFKMFAISDKKCHSGSHIHMRYQDYKRTDACSKDGTGGENAYDFYFVLSGES

CQDLPKGAYQDRFLCNRYVNCTGDKTIIGFCSKGLFFNPASEKCEKGVPCKDGQPCLYV

PKDGKYEHPSSCRKYLYCKNKEATEVSCSGDLWFNTKTEKCDVPKNVDCPHDPCVDTNC

RNGGTCEASSSSENKYKCVCTEEYSGPHCEKKVPHPCKSGPCKNGASCTELGGEEFRCT

CKAGFAGKLCQKDLCNSRPCQNGGTCYGFLHDPRGYRCSCRADYTGDHCEKEIPHPCRA

RPCKNGAVCTELGGERFRCTCKPGYSGRLCESDLCDPNPCLNKGTCTHAYRGYTCKCTA

DFTGSHCEKEIPRPCRDDPCQNGATCTELGGKEFRCKCTEGYTGKLCDKKKPKDTTIRA

QSVILENDEGASNALMKFLGPVEDAGKSWKRCYRGSEFDFSSTAFHIHCHNKGPTVVLV

EAAGFVFGGYTDKDWTGWRSSYSYSEKSFLFSLKNPLGQPAKMEAYRYFDRAIYSSYNY

GPYFGAGPDLKIANQCNKNAYSSSRLGFTYREPKGYQIKSADQVRTILPVGRVSVSSYQ

FRVDEYEVFYQE*

>TRINITY_DN899_c0_g1_TRINITY_DN899_c0_g1_i2_g.15157

MFFTAVVSESAFSALKEGFPMAKLLWALQLLPLIAFIFIATDNVVDAKHHVPQFDRENEN

KTKLEVTIKHEKPESTDENKEEGESDEASEALIELILTEGQSGWKKKLEKVTKQNKNKK

NDKKKDKHRDRQHSTDSTSDENPSERSTESQPPTGAIDTLKGYFSQIGDKANRAKDGMS

KMIDDWGNKPADRRKDITAALNTAAAQIPKFANAKDDPVSAIAAAVSIGASFVSLAGPT

GALVSVAMNFIAGFLSLFGKGPKQKSVGEIVREQIDEALEAFHDQTLSDEAQAAIEAMR

QSKAFLDGVASTGQMISDSEASSLSAHVPVYYGVQFMSKLGVVIRRLIKANDAKDAKKC

LKYIELYCQLAALKDMTLQQFASLLPESHSNIRAGVYNDLETLRDAQALLFEFLYKSDL

GNKIMPYFDPDTSVISDVYLDKVLKIRNYDRWLAGTYCFTPGGQTKSMTWSTRVSQFSE

NRPYATLGTGSNCFWKVVPHGRWLFSIVNTKDCPDNGYCGALLSIDGIGDGKARVTIDH

EDPVLWEIGGNQQKRIRCMYGCNASPPSPFCGKELGMGYEQYWIWGRRKRSAFIGMGPS

RATELTGQLLDSYGGYVWWLTKTPITK*

>TRINITY_DN94892_c0_g1_TRINITY_DN94892_c0_g1_i1_g.100498

MGIITNCGVILALAVLSSRAASPLAIDMEGMRTTLRCYGLLYRLSNQEGMFKPDGSLNWT

TACAATQAFVDCFAEGSGTGFTLDANRVLNWQMCKANKVLKLCPEAQCDDLKKLARRTD

YWRNLPFPVSGGMQVECGRELHKECNHIYIDSLANHKNMAAYYMCYVDGYQTCPARALA

PLTQIYREAVTEGSPINVMFKKLQEAFRNQASAQHA*

>TRINITY_DN978_c0_g1_TRINITY_DN978_c0_g1_i6_g.89312

ADINSSKIGSGFTEPSLKSRGNVVQGQARKMSKIEPQDRPTFKVAHRLRCYGLMSRESFL

EFQTEFETIVNTITSCNERELWDYVASLFGVSDYADCVPINSANLSITWAPVVRCLNRM

TTDWNRDISIQKRENIFVPIISLARDVIAQQLNVPSDTVAMCRGSSEANGVITNGLDFK

DSVRNQVVVWSENHPTMSEIAWKIRQQRPGFNNMVIKKVEIPQESLESEVEIIDCFKAQ

IEAGKTLIVAFSHISNLSGARLPVRALCEAIHKMDKEIHVHCDGAQAWGAIEQDLTDIG

FDSGCGSSHKWMLGPKETGFLYVKKDRIPKIWPKDIGYNTKVESPTVVLPTDASRFEML

GQRNDLSIMAMLYSADLMGLIGFDQIEGRIKCLAEQLRLGLGEIDSKYFEIETPKTPAH

YHAIITLKFKDEWYLPSAGNEDISVAVYNVLYRDYKIGVSVKSENRLRFSPHIHNTKAH

MDRAVEAVKEILKKAKIRRPSSN*

>TRINITY_DN988_c1_g1_TRINITY_DN988_c1_g1_i2_g.88251

MGDSEFVPMKSAEAGGEPASKEKKAFVVSTAHAIAILILVIFVVVLVGVLSGVLSAKQAA

KKAREEAFADMARRNSDSSTKASPTDVAPTEPTGPEPWYQVRLPDDMKPIHYEVYLQPY

LLQNTFKGKVDVLFKVTKKRAKYANYILIHINEMNITKSSVSKQKEGISDPNAAIPGEE

VKVRRTFQYEKNHYYIFELDKDLEVRGKYVIRMEYKASLSLQLNGFYNSTYTNAKGETR

RLATTKFQPTDTRKALPCFDEPALKATFKTKIAYEDGYRALSNMPEEKNSNLKGAPGWK

LAEFQKTVPMSTYLLAFIVCDFNYTEAMTGQHKNITLRVWTTPDQVSQTKFALKDGKTM

LTFFEEYYRVPYPLPKSDMIAIPDFSSGAMENWGLITYRETALLIEDGVSSESNKQRVS

VVVSHELAHMWFGNLVSPKWWNDLWLNEGFASFVEYLGVNKTHPDWQMMEMFLLYDLQL

VFPLDSLVSSHPISVEVDHPKKIKQIFDRISYSKGSSIIRMLSGFLGTETFVAGLSSYL

EKYKYSSAETKDLWNSLNEKTDLDVPAIMDTWTLQMGFPVVTIKRKGDSNKAIATQEHF

LLDRNAKVTTPSPFNYKWYVPLTYVFQDNAKSPKTSWMNMDSVEFDWPKDKWIKGNYKQ

VGYYRVHYDDDNWNKLVQQLKDDPNVFTSEDRSSLIDDAFNLARAGYLKYDIALGTLDY

LDKETMYVPWKTALNRLSYLETVLNNRPAYGLLQKYKRDKVEALAKELGWEPGDKDGHL

EIYKRGAILGAACAAGHKDAIQNASKIFQEWKAGIRPSVNVDLRSLVYRYGIANSGPED

WEWLFEKYMNTSEASEKIKLMYALAGSREPWILTRFLGYSLDGKKVRSQDAVSLIVYVA

RNPVGKYLAWNFVRAQWDELFKMFSTSTFRLTSLISGVTSFNTEFDLQEMKTFFENSEA

GTSENARNQALERTRGNIDWLKKNEETIEKWLRENTKG*

In Both

>TRINITY_DN1027_c0_g1_TRINITY_DN1027_c0_g1_i4_g.103494

HICPDRITTPKPALRKVETFYDCVAPLLEQALGVCWVVRFISSCYLLGESKAKFMFIVRH

QSTTMTWLTGLLLALIACQCLAIRPDDCPVKECPEECPKLANCTEGPAYDYRFCECCPV

CAKVEGEVCGGRFHEEGTCAKGLFCSTDSKGVSTCQKRRCPPAPAKLVGCTLLPNTCND

DSNCDDETHCCYDGCRRRCRDPSEKFNSNHFGKPKPGKCPALPKPEFCAADVDECHFDW

DCNGNKKCCGNGCNKQCVLPGTAAGVLAPKCKPPPSRSSCPIHLRSSCDDDDECDENVP

STICCFDGCRRICVFPNGTTSGGGAAFKPGTCPFMNPPADCVSDHDQCVVDGHCFQDKK

CCSNDCFKECVPPADPKGPGTIVLPSQCPNVTRPGSCHVGLAHTCVANEDCVEGTFCCS

DGCRRRCFDPQGNTAGGGVEKAGECPAPSDLPAPEYCPSDVDECQIDYDCFQDRKCCSN

GCYKMCVPPNLSVGAAYKCPLVTESYQCHDGFKHLCETDEECTVGGELCCFDGCRRRCQ

APRGSPASKPSNGISVFCKDDGMRIDIEKDKLNGVKIFDLHLIDPNCKATSNNSHYSME

TPLVGCGTSSRYTSKFVVYSNEVIQKSENGESIITRNTDLTIPFACFYGKEGVTSTYGL

KPRHKATVTMDGGDTETRFTLDLSLFHDEEYQKPYGMDEYPVPVTIDEPLYVQASADIK

DKWLEVTADMCYATPTSNRDDAMKYYLIRNGCQQDATVLFYQAKSTQFRFSFDAFKFVG

VPSSFLYLHCHMFVCNVSNPESRCSIGCLREPRKRRAVQDVDAQLSQGPFILLNDEAKP

AKQVGQGAFSNQIMWVVVAMGAFCALCLLAVVYLKLKRKSPSPDPDRETYL*

>TRINITY_DN111_c0_g1_TRINITY_DN111_c0_g1_i4_g.76705

MSTARPPDKRCGTHAPGYLIGGHPAYEEGTVDRKVCFTWGGNACIVHAMIRVRNCGGFYV

YELAVLSHCKLRYCTNPNGINPTLPPTTAPPPTTAPVLPLPTVSLEVKTRAVPGDNGGK

RVEVYAKCSLSEKASKKYVLEGYWVIDGRQVPFEITKKKTTYELKELEEGFKAGTTISC

QIRGRQKKGKNNPWSAYVKSEEIYTGITITPDTMTVREDEPGKPIVASVAFPIDGTGTD

FTVTKDLFLSVEAGGPSPSDIHLSKKMISILENKLESDPVIVTAMEDQVDDGTKKAEAS

FTLVDDQPGESNFWKDYVVEVKKTVGKRSLDKRASSNSVDITTESQGSSICVTCGDPHV

RSYDNKYFDQLRDPGDYILTSNRQRNFDVHARIHRCWSVVCNCGVAIRENNDVIKIDKC

GGFPVVQQLSPEPVNGRVRVKRRNLGGRTEFRAFFTSGTEVKVLTYSWGVNLYVTSPSD

DSKRTRGQCGNNNNNAGDEHKDDWTKYRLPPRQSLFDRLPEKVQLPADVCPPNSDGNYL

SCTVRRPGINLNVGTDVVLTPGPLRYGGGRRKRDLTAEEEDEERFYSENDYLESEVFYD

FDYSVNITKRAEELGAVPDWGTQGVTEAQAREKCTEVLKNSGAGKACGGFDVGIDDRMD

ECMLDIQVTGDLSIAESAVSSMTALCVDEASRDPELLEVDEDGNLVPPANVVGAICPGD

CSGKGECKDGKCECKAGLGAEDCTIDLNKPPEVTSIQGDGLCNLDNRKCQVIRLEGSQF

LESDKLTCHFKPFKFQDGQETPDGGEVQTKAELSSSVEVACPYPEADQDALPWRYRVSV

SNNGVDKSEEFKTVVYHSMCHACKDSGECSDNVHKRKACVIDGICYGRQEFKQGDVCLK

CHPYMNRNKWTKYKHDKAPKFDMKTTYSGCVGQSFELDLHATDPEGTQVSFSLGSGSPA

GSSVTDGAFHWEVEGEKPTPVYIVGSDQCGQSRKFEIKMKIFQCKCKNGGRCLSDVEGI

PDCSISRRCKCPEGTSGDRCEKKG*

>TRINITY_DN1121_c0_g2_TRINITY_DN1121_c0_g2_i1_g.11906

MASFQLVLSAVLFLTLGIASSADDTNVVVNDVSQDFADDSIEYPQPAGQLVPRLEEEDET

GKTVNDVPGLTEDMVSDALRHARREVLDEEKNVKRDMTMQSRGYTHQAAHYRNRYHPAL

EPTRKRAMIMERTMKKVADSLGMRTKRERRDLYSLFSPEVSRMSCFGKARPLCNAHAPF

RTADGTCNNLHRPNYGSANSPFIRLKGAEPDYADGISAPRVAKSGRKLPNARLVSTTIF

KDRDIPSRDLNHMNMVWGQWLDHDTTLGGQPRIECRGRCGDNQGECFGIEIPYSDTHFP

HMGVFCITLKRDLPSVPERCGLMKPREQLNTLTSFIDGSQIYGPNLRVQREGRQLNPDV

GLVKERENPGGPGLLMMMPAVQMPNDTCRSPNLMTMPCFRSGDSRTNENQGLAVIHHVF

AREHNRLARVLKHINPHWTGEHIYQVCKKIIAAQQQHITYNEYIAEILDPKTRAYFGLN

IRQHGFDDGYDANINPAIINSFAAAAFRFGHSQIRNSMSRFGKHMHRYFDIDSSENHNP

EPLYDMHNGGMDSIIRGLAFDEAQEVDGFFAEAVTNNLKRNQNDVSDLPAINIQRGREH

GVPGYNTFRKACGLRPMKSLKEFESIVPASSVAKLYKLYEHPDDVDLFVGGIMEKHLPG

GAVGPTFACILAEQFRTLRHGDRFWYERNDPTIGFSLSQLNELKKITLARLLCDNSDDI

EKLPKWVLSTRSQVVSCRDLPEVDLMYWKEDVYH*

>TRINITY_DN11341_c0_g1_TRINITY_DN11341_c0_g1_i1_g.98710

MQSLMFVLIVCASLLHAHAAPGSGLLREKRSYDTAYDEPFVYECTQGPDCESQARVISYI

RSRHDNGKEDRVFDFECHSSSSVDKNRCSWGGFSNWDATINYNCPGEGAIVAITSHHSN

DKEDRRFSVKCCSLKPGANLQCGYYPHDDFINEYDQEFTLSIPSEAHINGLYSVHDNSK

EDRRFKFNVCQRA*

>TRINITY_DN1206_c10_g1_TRINITY_DN1206_c10_g1_i1_g.86263

MPSSGVKIAEEVINTYSEIKMEKKYSYAVFTIQDQKLVTLEETGPGYPGGKNAPVTEETS

REHFEQLRQSLKAKDGPRYVVFDCRMDANKDKLVFIFWSPDTCGPGKKMIFASTKDGVT

KKMEGLGCKCELHDDSELEFDNVKAAK*

>TRINITY_DN1228_c0_g1_TRINITY_DN1228_c0_g1_i3_g.85341

MRFGVASHLVLFLAVFRIESAQAACEGAGCFDPTDCSKCVPGRKGERGRYGQFGERGNQG

QDGPIGKPGLPGPKGFKGEAGIQGPPGDKGGQGMIGLPGFGGYNGIPGLPGVQGQKGVH

GLCGCKGELGDQGPDGPNGDVGSDGAKGIRGQKGVQGEPAENGEEPQFPGDRGEPGPQG

PPGPKGPTGGVGPQGEPGPQGGAGMLGNPGQEGDGGEKGESLPGVPGFKGNRGEQGDQG

EPGETLLGSDLKSSYQGPKGKPGNQGSRGREGDVGDTGGQGDAGSAGPKGAKGQPGKTG

EKGIQGEQGNPGVRGLEGSKGQQGARGAKGDAGSTGPSGKDGVAGARGKQGPVGEAGDA

NVAGPQGEPGPKGRTGPPGPDGDAGNQGPDGEQGEAGPQVMGPRGNLGDPGPSGPPGPP

GAAGVVGMQGSMGPPGEEGPRGQKGDKGEDVTGTPGDKGMAGPPGERGFKGDQGDIGDQ

GPAAIVFCTEGDCTPPNKGEKGVPGPSGDRGDEGDQGPEGPRGEKSTCPDCPPNPKGQA

GDPGADGEKGRPGEPGRDGPPGPGGTTGARGPAGKDGTPGIKGVPGAQGDNGTEGPKGE

SGRKPREELYEPPGPRGEDGDAGPPGKSGPAGSDGVAGPDGPPGIQGNTGATGEKGDAG

TVGTNGKDGIEGPKGMKGAKGAPPDVIPMPDAGERGAPGDEGDKGARGRPGPKGMKGDG

PPDDEKDKAIGEQGTVGEQGKQGPPGKKGDVGRPGPPGRNGTKGEPGDDVTGPSGQKGE

RGPPGVEGIRGFPGNQGKKGAKGEPGSKGMEGPRGLDGDDGQDGPPGPQGQSGADGNSG

DPGDPGDVGERGEKGSEGPRGPKGKPAGGKEKVTPGPRGNKGEKGATGDPGDKIDGPPG

DQGVMGLPGRPETGEKGAQGKTGDPGVQGGVGPKGLPGDRGNLGDPGMDGARGPEGPRG

IPGEISCGEVNSDFVFALDSSGSILPREFGLLKQFVNNVVNYLKIGEDLTRVGVIKYST

FSTVELTLTDSFDKETIKETVNGVAHDRGITRIDLGIKRAAEEVFTVAGGMRESSQKVF

VILTDGNQTGSDRAPDMVPLDQAIKPIHDRDIKVIAIGIGSVDYSQLQTLVQQDEDILT

ARDFNELLTKVKETIARSCRGPLGNKGDLGLKGTTGDAGAPGNPGFPGLKGDVGPPGEQ

GAVGATGPPGPGGDEGSQGDAGPPGFQIPGPVGPPGDPGDQGLQGEAGLDGFDGDKGAT

GDVGPEGPPGPQGLEGPGGKQGPPGETGAVGPKGDVGLDGIPGFEGIRGNTGPPGPSGN

VGRKGVKGATGGEGAMGPPGDSAPGPPGEQGAFGMPGEPGDSGPQGAKGDPGEPGPPGP

SPIGELGLQGLPGPKGDQGPPGRLDGGEALIPGPPGDAGEEGLSGMPGIKGNRGSAGIP

GEAGGSGTQGPPGEPGDVGTPGPAGEDGGRGDPGETGANGDDGNPGLGGAQGPPGETGV

AGASGSRGPRGDPGDAGAGGQRGPKGPDGDQGPPGESGGAGRVGRRGDKGARGEDGFPG

FMGPSGEQGARGGDGAQGATGELGALGPKGARGAPGDSGFPGIPGEIGRKGDRGNPGAL

GVKGDTGSRGPRGQHGDDGNAIGPPGDKGEPGDSGPPGIKGQQGDPGDAGLTGTVKGQK

GEQGFEGAPSTVKGPAGEPGQKGEQGRQGDPGDPGIEGLPGPPGAPGNAAQAAGFHVVH

HSQSNVAPTCRNGWKKLWSGYSLLYVQGHDVSHGQDLGSAGSCLRRFTTMPYLFCNTLK

NTCLYASRNDYSYWLSTNQSVPMMPIGAPAVEPYISKCTVCEAPGPMLAVHSQERTYPA

CPTGWIELWRGYSFLMHTGAGGSGSGQLLSSPGSCLENFRVNPFIECHERGTCHYFANK

YSFWLATVPNMFVKQQPETLKSGDRLNRVSRCRVCYRLARKKKRSVEPSFSHHLRFGTP

VGRGQNGRLAGDFDRFPFEHGGI*

>TRINITY_DN12671_c0_g1_TRINITY_DN12671_c0_g1_i1_g.35401

MSHVTNAEVQKKCPAFIGGGCPYSSLPQEKKGIAGNCPAFAKGTCPFAECKSVGEFQDKL

SQMRDQCKGDYAYQEFLKAVVLTSQQKEVELGRGCPFFNKGCPFSHGKDVLNPPSAAAP

FSVSHCYLKAKCPAFKGGVCPYSDLPKEMKGIAANCPAFKGGCPWK

>TRINITY_DN1338_c0_g1_TRINITY_DN1338_c0_g1_i2_g.114638

MIFDGNSDPTTVVKNRLGASVLARFVRIKPTKWHRHISMRVEFLGCLAECIEALGMEDER

ITDGQISASSEYNSIHAAKYGRLNHADGAGAWCAKTNDGNQWLQVDFKVLTKVTAIETQ

GRVPHSQWVTQYTVSYSVDGSSFQDYKQNGQVKIFDGNSDPTTVVKNRLGASVLARFVR

IKPTKWHRHISMRVEFLGCLAECIEALGMEDERITDGQISASSEYNSIHAAKYGRLNHA

DGAGAWCAKTNDGNQWLQVDFKVLTKVTAIETQGRVPHSQWVTQYTVSYGVDGNYFEDY

EKNGDVKVFVGNSDSDTVVQHELIPPIVARYIRIHPTDAYGWRSMRVGFQGCPAACSAR

LGMESGSIADEQISASSEWDSTCAAQNGRLNSANAWCPKTNDNNQWLQVHFGALTKVTA

IATQGRASGGQWVTQYTVSYTTDNVDFEDYVSNGEVEVFVGNSDSDTVVQHELIPPIVA

RYIRIHPTDAYGWRSM

>TRINITY_DN1353_c0_g1_TRINITY_DN1353_c0_g1_i4_g.114806

DRAQGNTNQNNVRCDQRDLATPGWYRFQGDAGDRMPENQCVPTLRCGTHAPGWLNGSHPT

VDEGAVQRKVCYHWSSNCCRWSNNIRVRNCGGFFVYELQRTPACYLRYCGNAGESTRAP

PTTPPVVDMCRHYKVLFDADRAVGNPRQSPVQCDRGLAPGWYRFQGDAGDRMPENQCVP

TLRCGTHAPGWLNGSHPTVDEGAVQRKVCYHW

>TRINITY_DN1467_c2_g1_TRINITY_DN1467_c2_g1_i3_g.63655

MVDQLGDEDKTSPEVVDRCRSVDDRYEALLQRAAIRRQKLLDALSLHQLNRDAYIVESWI

NEKEDRLDSALTVDKSMDLEECQLIEQRFDGFTQELNANEKRVEVVNDLGSQLIEKGHI

NSDEIRETTDRTNTRWANLRAAADKKRADLDKALRLQQYYADVTETRLWISEKSSLLLS

VEEVTNMKDLSTVMVLQRRLNSIQRDVGPLEDKVTCLEKEADELCSEYEGEPEEPIIRE

KIESVSSPWKELKNNVKKRDEALAESGELQRFVIDLDNFQEWLNTTEEQVVSDEIPNSL

LDAEQMLKEHEDLKDEIDSREPDFSQLMESGPKWIQDESDLQQQSLKEQLDNLETGWND

LHVLWEKRKRLLIEALNNQLFIRDSKQCEALLGQQELFLSKQEVGATVEAVLDQIKKHE

EFSHRMDANDEKINQMVAFADRLASENHYAGDKISAKAQSIDEWRVANRQKLEAALARL

RDALQLQQFIQDAEEMYDWLNERYNIASEESYRDLSNIQGKVMRHKAFEAELEANKERL

DQICESGRSLAEEKPEDKPEIDERLEKLNVKWQELEAASKLKGQKLGDAKKQEEFNAGV

KSIEGWITELESMNVSTEKATDLTTATRLYQKHKMIKEEIQAKRTHLAELNSAAQDLVD

AGHFDPDAVKEQTIVMEQRYDAMEAPMDERGADLESSLNFYQFNRDVDDEEAWIKEKEP

QLQSTNYGNNLFEVQKLLKRHRTLCAEIKIHEKHKDSISEKGEEMVQAGHPSSDEIQER

TEELQEQWDGLKKLSDEYKAQLDLSLQAKQYYYDASEAEAWMSEQELNMMGDERGKDEA

SASAMLKKHETLEAAIADYAENVNELRDTANGLVESEHPESETILVRQEQVDKLYDGLK

DLAEERRGKLDETLKLYQLNREVDDLELWIADREVVAGSQDIGQDLAQVELLIEKFREF

ARETTNIGTERVASTNAVCDQLIGTGHSDAATIAEWKDQINESWAGLLELIETRKKLLE

EARERHKFFDDAKEALSMIQEKENLLTSDLGRDLNSVRQLQVIHQGYEADLAPLGNQVA

AVQEEAARLQGSYAGDKAREIQQKEDEVVEAWKNLNLHVRQRTDLLHDADDLHRFLLAV

KEQMLWINDMLKTILAYEKAKDVPGVEALMREHQSLKVEIDARQDSFQDVIKMGEALLA

KKHYASVEIQEKLDMLNRSRSELHLEWEKRWEHLNLILEVMQFARDAYMAERWMVSQEP

QLKTDNLGEDIAEVEKLLEKHGNFEKLVLAQEERFGALERLTAFEEREKLRRKAEKERR

EREERERVERAERERREAEERERERQQEEQAARRRAEQERREAEQRAADAAATVASAQA

AQVHAAPDEKGEEDDSVTDIKMEGYLHRKPTMDGNKKATIRQWKSFYVILRDMELHFYK

DQKSTRTSEHEAAHPLPTAANECEVASTYTKRKHVFRFRTSDGHEYLFQAKDEDDMQLW

IRHISEAREGTPSKKEKRPSSKKGKKKH*

>TRINITY_DN1521_c0_g1_TRINITY_DN1521_c0_g1_i10_g.93804

SGMRSNTIKVAIVITDGAQTTTGPYTELSVASSGLKNKGVTVYALGIGKNVKESELEKIA

SSRDYVYSATSFKDLQPISDRLRNNLCTVPPRIVYHSADNQTRPGESVSLECVAIGVPT

PTVVWTRDGREYAETKAEGRSVLTITGVSKDDVGTFTCKAQNGIQNSEGGLIVASEDTI

INLIDPPKITFITGSQQVLLGGDVTLECVATGSPTPTVTWKRNGQTLPQTQALGKSVLA

INSTTADDVGAFTCEAQNGMQDVNGQLIVDRADTKVEIVAPPKITVITDKQEVFAGGDV

TLECVATGTPIPTVTWKRDGVDYVPQTQEPGKSVITINGVAAEDKGAFTCEAQNGVKNP

TGEIILVRAGTNVEIVGPPKITSITKPQQVFVGGAATLECVATGTPPPTVTWKRNGQDY

VSQTQEPGKSVITISAATASDDGAFSCEAQNGVKDSLGEIIVDRADTRVNIVAPPRITS

RMPDINAVVGDKVILECIATGIPPPTVTWKRNGQPYSPPTMDQTEGRNVITLENIRVQD

AATFTCEAANGLQNPQGDLIVDRADIKLNVAGPPKITSITKAQQVLVGADVTLECVATG

TPLPTVEWKIEGQEHTVLQSEPGRSVVRINGMVAESVDTFTCEAQNGMKTTEGQLIVDR

ANTRIDVVAPPKITRPLADVNARVGGDIRLVCVATGIPPPTVVWKKDGRQYSPQTQQAG

RSEVLISPASEQDTGSYTCEAQNGVTDSQGRVIVDRVDIKVKVADLCKVTTCTRPYSTC

EVRDNAAECVCRFSCSSERSLVCGTDGKSYENECLMRQAACQTDTSITVRHPGDCAPPR

ITSRMPDINAVVGDKVILECIATGIPPPTVTWKRNGQPYSPPTMDQTEGRNVITLENIR

VQDAATFTCEAANGLQNPQGDLIVDRADIKLNVAGPPKITSITKAQQVLVGADVTLECV

ATGTPLPTVEWKIEGQEHTVLQSEPGRSVVRINGMVAESVDTFTCEAQNGMKTTEGQLI

VDRANTRIDVVAPPKITRPLADVNARVGGDIRLVCVATGIPPPTVVWKKDGRQYSPQTQ

QAGRSEVLISPASEQDTGSYTCEAQNGVTDSQGRVIVDRVDIKVKVADLCKVTTCTRPY

STCEVRDNAAECVCRFSCSSERSLVCGTDGKSYENECLMRQAACQTDTSITVRHPGDCD

PCQGKVCDRPFAICVNRGGVAECTCELGCSNEKDLVCATNDITFDNECILKRRACALNA

GFTMRRKGHCEPCRGVNCQGGICRTYDDQAQCCPLSCPTVVDPVCSSHNRSFDSECAMQ

RDACEKKKAVQIKSRGFCPLTQCKSIVDICFLVDSSGSISRSNWRRMKLFLKNITTSFQ

VGENAARFAAISYSTNPQVEFYFNGLTGSQVTNENYHRLIDEMSHQKGFTYIDKALEMA

NEEIFKVGRGMRPEVDKIALVFTDGEQTTSGGYTPLGIASEPLKRRGIKVFSFGIGKRV

SLSQIRAIASDPVHNVITATSFKALQNRINTIMEDLCSFA*

>TRINITY_DN1521_c0_g1_TRINITY_DN1521_c0_g1_i5_g.93805

SGMRSNTIKVAIVITDGAQTTTGPYTELSVASSGLKNKGVTVYALGIGKNVKESELEKIA

SSRDYVYSATSFKDLQPISDRLRNNLCTVPPKIVSHTPDDTTDLGKNVTLECVATGVPT

PTVVWTKDGREYGETRAEGKSVLRIVGLRNEDIGTFTCKAQNGVKNNDGAVIVVTEDTK

IDVLEPCEREGCNAPNNLGCRNEGNEAVCICPVCDDVDEAPVCSKDRVQDSGRCEIRRQ

SCLVGENIEIAKEEPCGNECNPIMDLMFIVDSSGSIGRSNWARLKRFLMSITSNLDVGQ

GKTHVSTISYSTEPKIEFRFTVGQKKKEVNSRLEGMVWQRGFTYIDKALLLADRDSFTA

PSGMRSNTIKVAIVITDGAQTTTGPYTELSEASSGLKNKGVTVYALGIGKNVKESELEK

IASGRDYVYSARSFKDLQPISDRLRNNLCTVPPK

>TRINITY_DN16324_c0_g1_TRINITY_DN16324_c0_g1_i1_g.13613

MAGRFHRQHCFLCDLPRYPWAMLHDFSEPVCRGCCNYEGADRIEDAIHNSRLLRRTWENN

ENNHGRNATQERLNSAGSSVSSTPSPPPTNGVYQDQRRPSSRFQNHYRLAAEEAAESVL

SANMGNHPATSAPDNVNNINSGGVGRQRAQSIGSREAERRHFVADDQRQPVPNGNPFSS

RSQASLMTQNFVDSPRPDRIRETLSTLNQCAPFNIRLKKDHNIIGVMFAFEIMNRAGSE

YELKLLSEYPKGSGNEYLTAAGVVKQMIVDSPIVKDIGRGATSSGLKYLEYEKEREKND

WRPFSDFLPEAVRLFKEPVNLKLLPQPQLDTVNPSLLRLKNPCYQRPGIPVSRKHKMAM

EMEEYELAQGKRRMHPLRLSRDDMHHQHWMQSQVDPSKLPASSSAMIAPPGMPVSTIPS

ASVPPIMAVSQGKMNAVVLPGSDVHGRVPPKSPMAPGSRLDHTREESVGHLVMSTGVVS

GEGLSGRQQTSPRRTTTSPGMKSAETQSTTQDGEIKERGSGMNPGIVTCVICHEKLEDT

THFVQCPSVPHHKFCFPCSRESIKKQAGSEVFCPSGERCPLQGSNLPWVFMQKEIATIL

GSELALKKEKET*

>TRINITY_DN16795_c0_g1_TRINITY_DN16795_c0_g1_i1_g.119606

MNTLILQVLLGLLAAPYGASLVAYCRMAPNIQPAEGTAPKVTGYIVFEQPDHGGDTYITA

SLYNIGKPYSEYGIHIHQSGDIFSRGCQSAEGHYNPFNRNHGGRYSPIRHVGDFGNMRT

DASGHAFDAFYGRQVSLQGPNSVIGRSVVIHAKRDDLGLGAGESLENGNSGARLGCCVI

YTLHRSW*

>TRINITY_DN16986_c0_g1_TRINITY_DN16986_c0_g1_i2_g.27281

RDPYEKHWQVDDVDSSKCTNACDQRARCGCGLVYGDYKCSCQKGYYGAGTVGNCEPCPRN

TYKDFQGHALQCTSCPANSGNSGPGSTQIDDCECNPGYAGSPERNEACQVKLCDPLSAP

DNGYFTGGGTCAREYGTVCSMACNEGYKLSGSATRTCEVDSDGGVRWSGGTTLCSEITC

SSLSVPDADPKTGNCVINGQQAIQMVYQTKCTYTCSRGYNLVGSKERVCQLDESWSGSG

TACEKITCPALSALGVGSYVPGECDDQAMDFDRICETRCPSGYHIYPGAQDEYTYNRKC

LLTGEWDGEQKSCKDNEPPKLTCPTGSIDANNDPGKNVATVNWSFDFTDNSLTANEPGV

TKEKFTVVLTIENNETSTTLPKLLTIGKHAVRYTVTDLAENSQSCGFDVIVKDTEPPTC

EFCPSDIVLDNATSATIRVNWEAPRCSDNSGIPPTVKGNRQRGDQFGVPGKYEISYTVS

DGAGNEGNCTFTIDLSLLSCKMYPPPINGSLICNTINYEPFCSVKCRQGTDFAFNPPLN

YYCTSGTWNFWAFPGQPFETTLPWPDCSVRATPSWLKSNGFTDFFYEGDCNDPNVKAKL

AADYWNFLRGPYIPPPFCTINPDCTQDNIVVYCGQTSAADKRRRRAGTREVKIRFEYIN

KQTGLKQGVDDQNSQNEYNAKKQQVQSDVIDDVLAKSKNPTAWNEFKVTSGLELKGEFK

LENAEAYCSEDGGVVRKCESLDVNWATGEYKCNKNSGSITKCIRCPAGTYYDSDHDDCR

MCPEGTYSRQEGVLKCNSCPKGTWTFGNRKENFTSCKEECGPGFFSGTGIARCYKCPLG

YYSDGIRNTGCSKCPAGTTTVLAASKGIEECGMKCAPGTYSNNGVEPCLPCPIGTYQDS

QGQLTCLPCEKQLSTYGTGADSEGLCTEINRCASSPCKNGAQCVNAKDTYRCECAAGYE

GTNCEKEKDECLSDPCYQGATCLNKVNAFQCLCPEGFQGALCDEPISLCTKNKPCLNGA

TCIDKAGGFECQCAKGYSGVFCELNADECASNPCQNDAVCISGLDTFSCMCKPGYSGER

CQINDDDCASKPCVNGGKCVDGVRTYTCSCPAGYSGARCEHLIDECQSSPCQNGGQCID

KLGDYECICKPSYTGMKCEQQLSSDYDLSFASRVGKSVSKAKKPIPDLTAVTIAFWMRT

SDRNPGTVLSYATEDAGKVQDNALTLQDYASLNLVVNNVTQYVKIDATDGQWHHVAVTW

DSASGAWYSYIDGQEAARYAEAFQRGEVIKGGGVLVLGQEQDEIGGGFNTEECFIGDLS

QANVWNYVLSADQIYNLHLDCNNFQGNLLVWGDFREELNGNYALTPTSYACDFGTTIRR

YAARPGAKLSSSRKTVSNKSPEECVSACNNEGSFICRSFDYQKSTSTCYLSDKSSVDSN

INVDTSNAFDYYELNCLREVGVSAEVTIPNNRMTASSYYNSVFPPHAGRLQLHSVRNSQ

GTVTLGGSWAAKTNDNNQWLQIQLDAVMTITGSATQGREDAAQWVTSYKIEYSADGSSW

TYYPQTLPGNTDQSTVVRHELRPFNAKYVRFRPQGHHNHVSMRVEIYACPLPLTKPADS

NNECSGTPCNNGGVCVNWYNMFLCKCPAGFSGTRCETVHSCGDPGTPIYGSKSSSNYGS

GSTITFSCNSGYAISGSSSRTCQNGQWTGTQPTCEDINECAGNHGCAQWCRNTVGSFYC

ACQKGYQLSGKSCNDINECSTSNGGCSHSCHNTVGSFSCSCPAGMTKTAGGRSCVDVDE

CASNNGGCEHKCDNKMGSYDCTCNKGYALRSDKKTCLKLSCPNLGNPQYGTITYSSGLA

LDSVATASCQSGYTTTGGSARTCLADSTWSGVSAQCVRVYCREVGIVKNADRAVEGYMS

NRAVVGSIARFACKAHYIMEGSAARTCQNDGSWSGVQPRCIAAFCDKLATPSHGEVQGF

RFELGATLRVNCEVGYDLIPSSSSFRKCEEKSGGGGQWSGQDPVCQLKDCGDPGDPYGG

SRSFQSTTYLSVVMYACKPKHHLEGTATQVCQADGKWSAEKPVCLERSCGNPGVPANGQ

KIGDSHKYGDTVTFTCNTGYTMTGSSSRTCEESTAKWTGTQPTCNIVDCGDPGQIAHGF

RYGSSTTYRSILYFECNPGYKLSGSIGRYCQSSGSWSGSQPSCVASGCGADLIGPNGEI

TSPNFPNNYGNNQHCTWQITVPVNKQVRLDFSEFKTEGGKDVLQVFDTGSREPVITFSG

ATYKPPPFTSSGRSLRIRLITDGANTFKGFKVAYKQVATGCGGVRVGGPGALVSPGFPG

GYAHNLDCVWLLHIPGEKVDLRFVEMKTESTYDYVSIHKGHYMSSDNLIAAGLSGHDVP

GGSFVGTDYMWVRFRTNYIDSDGVFHSGWKADYKRYYPYYDVTKKRKK*

>TRINITY_DN1746_c0_g1_TRINITY_DN1746_c0_g1_i1_g.71458

MASGKYTLTPEEIEDIREQFSEFDVNKDGHISSEEIGSLLMSLGEDLPGYRIRELINEVD

KDENGMVEFNEFLEMYCTTTKKKEGAGLLKFVKKQEGLKKLGGTSEGSADGTTHTFSDE

EKVAFVDWINSALGDDPDVKGLLPISTEGDDLFTKLGDGIILCKMINLSAPGTIDERVI

NKKKLNLYLAHENLTLALNSAQAIGCYIVNIGAEDLHKGKAHLALGLLWQVIRIGLFAK

ITLSNVPGLARLLLEGETLADLNKLSPEEILLRWFNYHLQKAGSNRRVKNFSDDIKDSE

CYMILLNQIAPKGTNLDPTGSVINLPDKNKRAEKMLYNADKLNCRKFVRAKDVVQGNPK

LNMAFVANLFNNYPGLPPMDEDELDQEEMEPYEETREDLSFRNWMNSMGVDPYVNNIYT

DTCNGLILIQLFDIIKPGIVDWNKVNRPPFKKMGGKMKQIENCNYAVELGKQMKFSQVA

IGGKDIHDGIKTLTLAVVWQMMRAYTLKVLNELQPGIKDQDIVDWVNEKLAGAGKKSRI

TSFKDPSICSGHAVIDLIDAVKPGAVDYSLVTPGETEEEKLLNARYALSMARKVGAHIY

ALPEDMVEVTPKMVMTIFACIMSFASSANSA*

>TRINITY_DN17483_c0_g1_TRINITY_DN17483_c0_g1_i2_g.117071

PPRDDTPTACSKIRSQASGVNDGSYVPTCTGDGGYEKVQCHPTSGYCWCVDRSGKEWTRT

RQLGRPTCEHEAGLTPCEKERFSYTRQGRSLGAPQCTKNGDYKRVQCYGVLGECWCVDK

AGREIRGTRKRGQQPLCLPPGVLPYCVLERRFSLGWNDIRIRGMFVPECTVEGKYENIQ

CHTRTGWCWCVDDMGREYPGTRVQGKPDCQEIQAVISDCVKDRNRAKAWSSSLVFSPQC

SSDGSYLPVQCQQSTGYCWCVDARGNEIWGTKARGERPDCSKIAETKTVCTKESEEGIK

LQMSRFQISGFVPSCDENGAYKPVQCGAEGLCWCVDRYGNELPRTKTAGIPYCPLFAGM

TSCQKKRMFRLAWAADASPGRFIPVCRADGGFKRTQCERSTGYCWCVDEKGYAIPRTYT

RGRPLCEEPETLRRCRYERERMLPWPERFAPECNPDGSYKRVQCHGRDECWCVDRYGNE

VAGTRVRGRPTADCADIPSSGARTTCQHQLHSDRRGSFYYRFRMPTKPKLKCDGSGGFN

PVQCNVGSPYCWCVDKYGQHIPGSKTRGRPDCGLTAALSMCRKERQVVLGYNGTAAPGR

FVPRCRPDGSYDPVQCHDSSGFCWCVDKDGVEIFSTRRRGMPPCGVMAGKTPCQKDRIR

ALGMMGLPAPGRFVPECDSKGEYKPLNAITPLATAGVSTGMDKNYRGPGPKEA*

>TRINITY_DN1932_c0_g1_TRINITY_DN1932_c0_g1_i7_g.54941

MELDVKMPYSDPTSADAEWKKIQQNTFTRWCNEHLKCVNKYIHNLETDLCDGLKLIALLQ

VLSQKKLPRHNKKPTFQSQKIENVSIALKFIEQENIRLVNIDSSDIVKGNLKLILGLIW

TLILKYQISMPYMDDEPAEGGQKMTPKQALLSWVKSKMPESVPMDNFTTHWNDGRAIAC

LVDAAAPGLLPECEDLDPKESLQNATNAMTLARDWLDVPMVLDPADMVNPKVDELSVMT

YVSYFPEAKCKPGAPLRPRVHPSAKCYATGPGVEPKGLVCKKPAEFTVFTQGAGMGKLS

VQVWGPGKKDVEVFVQDNNDHTFSCYYVPTVVGRYDIHIKWNGRHIPKSPYRVEVSPDL

DASKAYAKGPGLEPRGIVAGKYTDFTVFTKDAGEGQVTVKVIDPRGGEDVDVIIEPQEG

GEYFVEYQPVNTGKHTIKVMFGGQHIAGSPFHVTVDPPKVDPVPSKVKVYGAGVEPSGL

KSGQRAPFTVDTRGAGDGVLDVFVEGPMGEEKVDIKNNGDGTYSCCYFPGKFGKYVVTV

TWSGTQVPSSPFTVKVATPVDASRIRAYGPGLERGSTDSPCEFTVETKGAGIDSLGFAI

EGPSQAEIKCVDQGGGVCHVTYFPRVPGTYAVHITCGDVDIPNSPFMVPISPPGDANLV

YAEGPGLEPEGVVAGVPAEFTVYTDQSGPGLVDVKVIDGNGRKANVDIKDNKDDTYTVT

YYPEKPGLYTVNITFNGQTIPRSPFRVNIGTSNPAKCRAYGPGLEKGLVHKPNKFKIET

KGAGEGSLGLTIEGPSEAKIECQDNGDGSCDVTYWPSDPGAYSINILFADQHIPDSPFV

SSISYPLDPSKVKVDGPGIEPGVRAGEPADIDIDTRLAGDAPLYVDVVDELNQSVPCDV

DEEEYGLHAVTYFPKKSGPHEVTIMYAGEHVPGSPFKVPISPKSDASKVKVTGPGVTRE

GVQPGKPTWFNIDTQDAGKGDARVKVQPVGHGARPVSEVVVEEIKPDVFKCSYTAPEEG

DYEVDVAFDGEPVSGSPFPVQVARPCDASKCVAQGDGLEKAVIDQLAEFDVDCSKAGEG

ELEAHVINPSGAETDALVTNNDDGSYSVSYTPTEEGVHDVDVKYGGKPIRGSPFKAHVL

PPTDPTRCKAYGPGLERAVVDEPANFTVETKGAGEGGLSLAIEGPSEAKLNCTDNGDGT

CSVSYVPVEPGEYSIHIKFADEHIPGSPFIARVTEPVDVRKVKCFGPGLDRTTPLYSTV

PQQFTVDASETGDADLDVAIETPDRKSIKPDEVREKGDGVYDVVYTPEDEGRYAVNVKY

ADQHVPNSPFRVRAGPPFDASKVKVSGPGVEGNPVTEEVAPFTCDVTEAGVAPLSATVT

PPSGPAITPDIKDNGDGTYTVEYVPEKPGRYGVDVKYGNRRVPGSPFRVQAKPGGDPSQ

VKVEGLEPDEEIVAGQEHDIDIDATKAGKGKPQVAITGPGRTKVPAEIVDNNDGTFTCL

YTPQEPGVHTYDVQYAGQPVPGSPFKAKVQPSADASKVEVDGLGPGELVPVGKEYDFDI

DASKTGKAEPEVAITAPSGKRVPVEMTDNQDGTHTCAFVPLEEGRHEVDVKYAGDTVPG

SPYSFKATPPEQPVNEEIVAAADERQNESLPDWPESPSDGKVRAYGKGLERGIAHEPCE

FTVVTKDAGPGGLSLAVEGPSKAVITCQDNGDGTCSVQYVPEEPGDYNVNVKFADEHIE

GSPFVAHVYSSWDDVDAAKPRPTVGKPCDVCLNIPDIVSPEDLKQLQATLQRPGSRREE

PVDLFMNDDGTLGVTFTPYEPGEHLIHVRKDGQEVQNSPFSVLVQAQRMGDVYPVGHAC

DLGIKVPEDADELVATLRRPNSSVEEPLKVSGKLEDDTLDVSFVPREPGEHFLSVKNKK

DDTHIPGSPFSILVEAVEPVEAVGCPLDYALDIPGINMPEDFAKLKGSLKRPSSDKEEP

LKLKLNSDNSLSVSFVPQETGVHYINVTKYGRHVPGSPFEVDVASEEPPRQVGKPMGKG

LDSPDVNLPEDYPRLTAALKRPSSKREEPIRLTLNGDGTLSIAFTPREVGEHLIHLRKD

GRDVQNSPFVIMVGEKDKVEEVHPMGKTCDVNLDIPGVNLPEDLTEGRLKAYLMRPSSV

KEEELGLELNPDNTLGVSFVPNEPGEHKISVRKLDKDVPGSPFSVMVEAAEAVNAVGRP

CDCLLDIPNLRLPEDIDSGKLVATLKRPSSNKEEPVKLKVTSDKQLCVSFVPREPGEHL

ISVKKYGRHVDKSPFSVMVVAPEEGNSIGRPCGVGLEIPGLILPEDYTSGRLTATLRRP

GSSVEEPLKLGLNSDNTLSVSFTPQETGEHFITVKKSGRHVTGSPFSVMVSGPGPANPG

KVKVTGDGLKKGVAGKPAYFTVDTRDAGYGGLGLAIEGPSKAQINCTDNEDGTCSVEYM

PEVPGKYSINVKFADEDVPGSPFAAHIKPAGAAEDDIIVADQGQDNYASPDFDDGPTQR

VSEVFEDLVTFGGAGSAQPHDFVFDLKGFKMDDLETTVVSPNGEVLDSEIIESADNTYT

IRFLPEQSGEHTINVKYKSRGTHISGSPFKVFVEAPMWGGAAKCTAAGPGLERGVVGHP

GEFTVWTRDAGPGGLAIAVEGPAKAEIKCKDNGDGSCDITYLPTAPGDYTVHIRFADED

IKDSPFKVHISPEVEEMFRDLTSDLAESDSGLKVGQPASFSVQTNADVENVTASVLAPS

GTETTASVSNLGDGNFAIRFVPREYGDHLVNVRFDDAHIPGSPFKIRVGGAEGHPEKVK

AYGPGLSSGCVGEPAEFTVNALEAGSGALALSVDGPAKVKMNCSENPDGTYNVSYNPVV

PGDYTISIKFAGQHIPGSPYSVRVEDGVSPGSTGDASKCTSRGTGLTRPVLGKPNTFTV

NASNAGRGSLMVGVEGPAIPAKEITVRHTGFNVYAVNYALENPGNYILKVLWADKHIPG

SPFHVSV*

>TRINITY_DN195_c0_g1_TRINITY_DN195_c0_g1_i1_g.77683

AIKARGSSHRFTAKLTRVHIEMASAIIEVIIEEAVEESVETAVEETVEEAVETTVEESVE

EAVEETVEETVEDAVETAVEDAVENAVEDTVEDTVEQATSSTIKRRIIMAIAGLLVGVL

VIGPIIDLIKAKTGAGKKKCKLDADTSSEMDKTTNVLDVLQKLVKSWAAQLKTYKQDAS

LGQVEDNGKKADAAGTVYTLFTDMKDKLNAASRIASECAESCEWKANIQQFRLDVILAA

YNVQGIFLAKDKATVMKEKNFPPEADRKTMTDTFNANYSTEWVEFIKLKAKQNLTKAVK

DQAKAASQAAVKNVISGPMKTQVKAGMEKQVVPDVKSQAMSAAKAQVTEVMNRYNSAIN

KHAAIPVYGIATLKSWMETYVKP

>TRINITY_DN20341_c0_g1_TRINITY_DN20341_c0_g1_i3_g.97666

ADIVFRIQCGQSGKDEKTVVPPAMKISILLLLAGLAAVNAENYVRVCYYTNWSQYRPAGA

KFFPESVDPHLCTHLAYAFAKIDQANKLAMYEWNDDKMYVRFNDLKKQNSGLKTLLAVG

GWNHENANSPFSRMVKTAASRKVFIDSSIAMLREYGFDGLDLDWEYPAVRGGSPAGDKQ

KFTVLCRELLEAFNQEAAQTGEPRLLLTAAVSAGKKTIDKAYEVDKIAKYLDLLNLMTY

DLHGSWDSETGHHTALVGPPGDELTVSFAVQYWIDKGFPANKIALGMATYGRSLGLVDP

ANNGLGAPAKKDWSNPPKGKYTREQGFLSYYEICKKSLTIVRENAVKAPYGYQGKEWVG

FDDKYSLKLKVDLIKEKGLAGGMFWALPLDDFQGTFCGQGKYPLMNAVKQYLGGYVPPP

PPTGATAAPTDAPTGPVNPPTQGPEPPTQAPTNPPSGSCVAIPPYDQYPGMDAWCASNC

AAGNCPASHCKCS*

>TRINITY_DN2042_c0_g1_TRINITY_DN2042_c0_g1_i2_g.8370

TFLARPWLLWLCEMDSRAVRPALWPLCMLLCIVAVSGDLYFNNGYLEYNTVKDITAVENT

ITVSFRTVEPMGLLLHGSSSGGSASDFVTLELIGGKLRYAARLGGHDGKFDDHEVYLGE

DLSDGVPHTIKVERVKKDVTITLDPEVRDPIVREEKSTYANLDLDRYIFTGGAIGLRLL

QGVESKSNFMGCIMEAKFVYKDQSDKRNDIDLLTESKKVPENIGDCPKEEYNPFSFLGG

GSKLVANTGSPDKMVGSFKFRTYKKDGTLLKQNKFEISYESTAVQLKVDSQPVSVNLNS

QINEGSWVSVEFEVSAASFKLTVNGQPNNLDGKALGSGFFASTTQFGSDFIGCMRDIVI

NSKKIIAADVPVSSRPKVVLEKCAIHDFCHPNPCLNYGKCDQDGVTFTCKCDVDSGYKG

TICQLPVYPLNCAELKRKDKDARNGNHTIDVDGPGPLKPFKAYCYMDDKKWEDCVTKIW

SLELNQKVVKYPAATGEPKLSFVRNVKYAPSLEAAKALARNSDNCTQFIEYGCKESPLL

NGGDFYGRWVSADGVHKSYWGGADSKSTACGCYPNCLDRLKTCNCDSLKGSWESDKGNL

TETSALPVSQVWFGGVNSARGKEGNFTVGDLLCRGEINNTATFINQDGMLRIKPWMPPS

HGVLSLFFRTPYPTGVLFSNGDLEKEYVQLRIVNSTTMALNFNVGSGTKSIFVTVNGEL

NDREWHKVVIYRNPKEFTMRVENDDDDNVHEGKVTLDLSSQRDLNVEGDMYLGSDPKAL

NGFVGCIRGLTVNGEVIDIQTAANEADPGSSVAGGCGAACHNNKQCRNGGECLDNYDVY

ECNCTLTPFYGYFCHLDHGAFFDQKSYMKYTYPTFEGFRGVDMTVGFKTDKCQGDILRI

TSKDTGEFILLAFQEKELKLVFNSGVATYETISSSACDGTRHSFAMTRRDMRVAYRFDQ

GDWKWVDKHNLNKPFPAMYQVIVGSTDETFEGCITGVKVQQYPLEKKRAAVQPIDAYLY

YDSASSEVKAQKAQVSVSGLSSISRMKCGPEPDDIPPIPTPRIPRPETPAPRRATTAPP

EDDGEGSNTAVIVIVVLILILVIVAVLVAIYWYWSRHKGVYHTHEDDENIKSTDPYIDL

VPASKQADDTEKKKEWYI*

>TRINITY_DN2096_c0_g1_TRINITY_DN2096_c0_g1_i6_g.8413

MISQNLFPLQSFVVTSVLQGILAAAQVVLPKDCKGNKFCEIMKMIVGPTAKFYLYGEFEW

KKIKVAAGFANIHIGFGLYFHKLELYVQGDWNATTKHIKLGFRADIKVPVNGDVYRDGI

KAPNSELFLFGVLEYDFLEQQVAGKLGMRGIWRKAYFIPFLGIGNIYFGITYKVGAPIP

ITGVQFGMRVEFGYDCLIPADFNNDGHCFGGAGYVGVGKPQFFYAEITALTLGKIARLL

GLTFKLPPPLDQSGFPEGASGSYSTDDFDLRIAGGPYIYKGFMIKGRVNVLGYSIYAHV

KLSDSTIFVDLKPDPIKLGNLVTIVRSPTDQKNGPWFYLDVKKDPIFYEAYIEGHVDLF

GISTYCRVNLTMTSFELLIQGNFLNLIKGELYIVAGYGFNSFVDLKFYVRVTVDLSGIN

NALDAAADAVDGAFKAAQKELRSAQDKVLEAKAECKRKMSLKCDNCKKLKCAQAEKNCK

GFLDAAGKWIGGVVNKVGQWVKKSFKAIGKALAPVGKAIKKFFKGWRRRRELQDLRNAE

FAVHIRRRRFISKIICEGIVGGGCKAVSYLCEGTCRAVEFIGKGLCNVMDVAVGFLKGI

EAVAGWVNKAIQFVLTQLFRVHHLFFEFDMDTYKGQAVFTAGVDLTIFGKRLFLAVSLD

LYDIVGSLKVTADRSTSWYKDKMNPKGNTDTEKNYYDNPNPFADFEMSEQFMIENQQSA

TDDRTGGCLYVENSNAGSYLKVTGCNETDERQWFSYTLKGQLMSMFSKLCIDTKGSSIG

NKVKQEKCDPRSDNQNYQCDLVVRTVKRRRANVCWTAGATSLSGPGSLVHLGSLKCIHP

HGGGNSVSEGNRLVIYAGCNEDRLEFKLEDGYLKHTKSGYCVRPVGSAVAGVELGLYQS

CSGHKFSFTKGGSLQHESSKKCINTANTEMKPVNGEKLVLSDKCENTEMSAIKEHLVFS

FIPTDPYIRMETCCDFGHPRLDQRFEVVDEPINTICSKFSRNLAYKKSTSQSSTAYNGF

SDRAVDENYSSVYNEKSCTHTNEETDPWWRVDLGSEQIVTDVLIVNRVNNWKRLTNFDV

RVGVHSDPSLNPTCFDRIRTVGQGQAIKLQCNPPIPGRYVAVQMYGKGILTLCEVSVYS

RVGPLADLCQLDNGGCAQSCHNLCNLKVKCGCWPGYTMAYDGKTCIDKDECQVNNGGCD

NIRGLCINTPGSHLCACKQGYSLKENSKTICEDKNECNVANAGCEHICNNTAGSFHCDC

RAGYKLKSDGYGCEDIDECATNVDGCEDQCHNYEGGYYCTCQNGYRLMEDGKSCEEIYC

PALEAPFRGAIAPDVCTDDRANIRRSTTCTYSCVDGHNLVGQDHSQVCQIDGLWQGATP

YCKAVTCPKLTKPANGAFVPASCSQADVEYGTRCVFYCYEGYEKRGPRYTTCQSDRTWS

ESAAMSCERVYKEPWIVCPIDTVVDLASDSSTAVLGYKWQLPRSNMDSLAVSPSNLNEN

YAFPVGKTRVMWTATNANGASKSCYYHVVVNDVTPPTVSNCPASFTIKTDNAWETVTWT

EPTFTDNVGVSVVSNKKPGQQLERWTTTNIQYIGRDAAGFSATCEFSVTIASYQCRPPQ

PMLNGRAFAFGIMMTLTCNQGYYFNPKPPGATGFTNQLYRCMNGEWNSFGQILTFFPDC

VVYSQPSGTSADQCVAGSVLTDLGGGTKLCLNCPPGMFFNTTSGQCQDCLQGYYQDVDG

KMECQICPKGQSTKHTRSKNANDCIELCRPGHFSDNGLDESGAPCEKCPKDTFQANEGQ

RTCDLCPAGSHTISDGATSLDDCVVPARVDEINPSGTHQVTEGDDIILECFVAGRPTPS

ITWNRLSGAEITDDRFREYVLYDQDNNVIGVEYVVSKAQMSDSGVFECRVQNAQATDSQ

QVQISVVQAPPTTLPPTGSAPPA*

>TRINITY_DN209_c0_g1_TRINITY_DN209_c0_g1_i2_g.31743

CVGDPSQTQPCNEGPCPIDGNWSPWKPWEPCSVTCGDGQQSRSRTCDNPAPQFGGADCVG

DPSQTQPCNEGPCPIDGNWSPWKPWEPCSVTCGDGQQSRSRTCDNPAPQFGGADCVGDP

SQTQPCNEGPCPIDGNWSPWKPWEPCSVTCGDGQQSRSRTCDNPAPQFGGADCVGDPSQ

TQPCNEGPCPIDGGWSPWKPWEDCSVTCGGGEQKRTRTCDSPEPQNGGAPCVGPPEETQ

PCNEQSCVQRVGPPGDPGPPGDKGPRGPGGPKGPPGERGEKGRTGEPALDGTPGARGPP

GPPGPPGPVFVVDPSDPNSPVVVPSDQKGPSVSLLEVRGEPGAKGAMGRTGRAGSRGQD

GDRGERGESGPPGAPGEQGARGESGVQGEAGLHGDDGLPGNAGESGPPGEPGKEGPQGI

RGAPGLRGVKGDRGEGGQFGEPGDPGSDGKRGVPGVDGRNGRNGGPGSQGPRGPPGEVG

EPGQPGDTGRPGQRGPEGTVGEPGDPGPEGNPGPLGLKGEAGDAGPQGEPGPTGEPGDQ

GEAGLRGQKGQRGRDGTQGAPGPKGSQGPMGRMGLPGDPGQRGNPGVAGDPGPNGSPGE

RGVTGGMGHEGAPGLPGPRGPTGLPGPSGDMGPPGKEGKRGRSGPPGKQGSPGPKGTQG

SRGFPGAYGKPGPNGEPGRQGQPGREGSKGETGDSGEPGAPGRPGLKGFPGARGRPGVP

GASGQKGMDGEEGRPGRQGTPGPTGLAGNMGFSGPRGENGAPGVDGSPGRKGARGEKGD

NGVKGMTGPPGPSGRSGQRGKRGSMGSAGSQGKQGLPGLQGPPGPPGRPGVPGPRGTRG

KDGSRGAQGTQGQQGTQGVQGRKGYLGRPGMLGRPGGDGSPGSKGPMGPPGPNGMKGPP

GLQGPTGRDGFPGNKGDPGRKGSPGFPGRNGRDGEPGYDGYPGYPGEPGLPGPKGSGGL

TGKPGAQGRRGDQGDRGEPGPQGIPGMPGQTGSRGEPGPPGPKGAPGPKGQKGEGGALG

TKGEPGKLGSRGTPGEKGDTGADGGVGNRGLRGTPGRPGPQGNPGRPGERGEAGEPGRP

GSKGSRGPTGKPGRPGSPGQTGVPGRNGWRGVDGEDGRAGPQGAVGDPGPQGHKGAYGL

PASPGPRGPPGFIGEPGIKGLPGIDGINGRPGEPGNPGPKGTPGNPGSLGLAGTPGIDG

EPGQKGETGALGEPGSPGRPGRQGPPGVAGSSGSEGTKGEPGIQGSPGENGVDGVKGAR

GSQGSDGMTGDEGDPGDRGSRGQKGDRGYGGRPGRNGPPGAQGEKGEPGSAGLEGDIGP

PGSEGLEGSPGASGNRGVEGEMGVVGPRGAPGERGPPGSDGERGDRGPPGPPGPQGRPG

QVIYTHVTGGQDKGPGRRLYAGSEKNSAIGQQSTEKEYQRFEDLVRNKIENNKVQMGTR

AYPARSCRDILLEGPATPSGNYWVDPNGGCVFDALEVFCDFPAKATCVSPRNAQIIFNN

VAPGTYMGLVQPEGQLLFEYSAGPVQLKFLRLLSKRVIQNVTYHCYNSRAWEEGQSIKL

KGDNDMELTTSAKTTPTVLKDECQVKDNKWHKTVLQINTKQRDGLPVIDVAPYDVQDSS

SKIKVELGPVCFMF*

>TRINITY_DN209_c0_g2_TRINITY_DN209_c0_g2_i2_g.31770

MALTRLISCVLLLCIVDYVAAQGCPPPRPQVSECPVYERFDEDDESTCGGPGQAACGPGK

ACCLNICFFECRDIVRQPERTQRYGLPGDQGPQGEPGQQGPDGRKGPAGQRGEPGTPGN

NGDPGPQGQPGMPGPRGPPGPITRVTDPLLNVGSLVPSPDFKGPMVEIREMRGDPGDPG

AEGRTGRTGARGADGERGDPGESGVVGPPGAPGARGVSGVGGEAGQPGQDGIPGTNGES

GPPGSDGEPGPEGIPGAVGLRGIKGDQGETGLSGDPGDPGADGEPGFPGDAGRNGKPGR

PGSAGYPGSPGEQGEQGPTGSAGPPGATGPQGSPGVPGSAGERGNPGPTGPKGEVGSPG

LQGAPGEVGEPGDKGVRGLLGASGEPGRPGRPGAQGIKGSPGGMGQLGLPGAPGSRGPP

GSPGAVGRPGRPGERGSPGKSGSQGSAGEMGVPGQSGPPGPTGVPGTTGKQGKPGRPGP

PGPQGRPGQRGSQGPRGYAGAEGRPGAKGTSGLPGAAGIPGSKGDQGESGRPGEPGKQG

GRGASGSPGKPGKSGSPGPAGLPGEDGRPGQSGGAGPRGVPGAPGLAGSKGGDGSTGAD

GERGAVGLPGVKGERGIQGEQGAQGRTGRQGSRGERGSQGAAGRAGPQGMSGPVGPPGL

PGKEGAPGSRGERGKDGSPGAPGEPGAQGERGSPGSQGRPGAPGQRGANGVDGTPGNRG

APGNPGSPGEPGPQGSQGPDGRQGFAGPKGEKGPSGERGTPGRNGKDGDAGLDGEPGFP

GSPGTAGPKGRDGNPGTPGARGRRGLPGGVGEIGSPGVPGSNGAPGSPGSSGPPGAKGP

KGEKGAKGDQGELGSPGDIGPLGSSGVPGAKGDTGTDGAPGFRGATGTPGRPGPQGTPG

SAGADGPPGTPGVNGAKGVRGPQGMAGQPGSPGVPGNNGNDGVPGLPGEDGPDGHAGPA

GETGAKGDNGQAGLPGLPGRQGPPGPTGVPGNQGVSGLKGADGREGPPGFEGPRGSPGN

SGPRGATGADGTDGVQGTEGTAGDKGAPGFRGPNGPAGAPGAPGVSGASGPKGSRGDKG

LTGKWGTNGLPGERGRQGPQGSQGDVGDAGDNGPKGETGDTGFTGRPGKPGPTGAVGEK

GSPGIAGPPGFNGTAGRDGFQGTPGANGAPGSEGAAGVQGPPGEPGDRGEPGYKGPDGD

PGPPGPVGPRGRPGRLIYTNVRPDGASKGPGLYSSSKHPSNNADNQMNQEPLPLAMLEW

SVIKPIEAKIRDHKSQDGTVLRPARSCRELHLEHPELSNGEYWIDPNEGCTMDAEKVYC

DFQQKATCVYPKEAQVNATNAKPEQWISESAGNQLFEYSADPVQLKFLRLLSKRVIQNV

TYHCYNSRAWEEGQSIKLKGDNDMELTTSAKTTPTVLKDECQVKDNKWHKTVLQINTKQ

RDGLPVIDVAPYDVQDSSSKIKVELGPVCFMF*

>TRINITY_DN21807_c0_g1_TRINITY_DN21807_c0_g1_i3_g.34345

MHSYNNWIHSLPGFEARRFGRRFQLGFSVMSGLVKAKKYDWKDSNLALFGSDLERNVKKD

AAETEKAWRGSGQKVGIQIWRIVQFKVTDWPKEDYGNFYNGDSYIILRTYKKDPNSEEL

DHDVHFWIGKYSTQDEYGTAAYKTVELDTFLDDKPVQHREVQDHESELFKSYFNKFTIW

KGGADTGFRRVEPTQYTPSLLRVHAEKKRVEVKEVPMKFENLSKDDVFIIDLGLQIYRW

IGEAANQKERYSSGQYAQELRSKRGGKPSYETLDDQTPEMLPDHLRQYFTVGQKKEKEQ

TDAKPKKELVLNRVSDASGTLQFKEISRGSGVQRSQLNSNDVFILDTGLECFVWTGKGA

SIDERRKGMEFAHNYLMKSDHPCVPVHVVKDEHEPDNFNKLF*

>TRINITY_DN21_c0_g4_TRINITY_DN21_c0_g4_i1_g.3027

SSTRFRGRSIGRATGETLSTMNLLVVTIVLSIGLVCAASSDDYGSELVRALMRESARSRP

VLDKPQRYDTETEFDDILPKLEERRPFAGLEKREPMGRTGYDKLDMARLAFLARELYDS

EGPCVDRELGCEEFYDNGQCWEKDLVDSMKDSCKKTCGYCRCQETRYGCCTSNGKVPAE

GYHKKGCGKKLCIDLDLKCQADQCKIKEDMAERCSYTCKACDRNKALSPPRGDCNAGNI

NKYPHGCCWDGSAATSADKQKGCPICADISPYLCSKHKDECGDTRFPNIRAFMFKCHQT

CGRCTCFNQYSDAVCEGPAKRGDCNRIPEVQENCRKACNICDCEDEYGKSFCQAWKKSG

RCSESGVQAKCRETCHACQPS*

>TRINITY_DN2366_c0_g1_TRINITY_DN2366_c0_g1_i2_g.62183

MSDQDTSTQSVGPRGGSTVRKTVTYTSTKGGSGSGSDVTLHHIHEAKEFFTDFEVLYRKH

RVEMDQMKKQHSQEVHKLTLEIENLKKQRRSLEDQLLDSKGQNKRTQDELVSVRKKLMQ

KETEFQALMRDLSSKNNLIATLKSEKLALQKEITTLKSEMVVSTSMVAEVQESAPVEED

LYTSQIIDIEASLKSSMDEKEGLEDEILSLQSRLARMQGDYEKALRDLDTTKKECGLKC

KKMEAQLQNSQRQRDDLKKQLERARDDLKRSKESIAGYQREALDNKKAADRLREELNSK

GKTIRNLEKKNGDLEDQLEQLKQTISECNMKVDVETKQCQAMERDLRNSEKRVAELEAL

TESLQNENDDLRRNITVSRGTISGLETQITKSKNRIKELEVEITQYRVRIQETESELDD

VNSKHAQLQSTYDVSMSEVDGLRSKLGSHSGKVNDLESLYNITAKERDELKQKIGPLER

KITDLTQALEKSENARDDLEQQLDALKNKNSVLETQLASANKTKAQLKRDLDGEKEKVG

QLRKELNALQAQLAEMQRNLDKSKSDNNRKQKTIDDLRNTIRQLENNIDAQQQELSEVN

TKNDILEDEKKEALEDLLDATRRAADLEEEVKKEEDDKNRLANELQDVAKKNSELECAF

DECDKEKNCFEEEVLALREKVKRLENELHDTAGKNAILEEDAKKHADVVGKLQDEIDQL

KSQLAEAKRQAESYRKELIERDTLIDSLKAQVADLEKENDDLGSQVADLKATIASLEDE

NRRLQLQLSGKDEEINRMSGEVEMTIKRNEELQNECMIVQDQVQVVESSYQDYLQSAGT

GEGDLQNERDKVANLEKDLQNLRQKIKVLEDRDTMRAKELDEVKAELAAADEKVNDLLA

DVQRLEGEKDDIGRDLLVAQSKANELENELGGALEDQKKAEDDLHDLQSKVSRLEGQLE

TLRKQNAKLKDQLKDANNANVQLKEKIGSLEVQLNQQEKANESLKKVVEKKDQAIAELN

EKIKKLQKLLDDAKRDLMSLTVANDGLKHDKKELERKLKAQNARIEQLENDLKELKAER

NALESKLSNKSHKLDLTEAQLASVRKERDNLKADVENLNATIRKMKEELLILRTQARQH

EKELEIKNKEIQDKDALIDRLRNAKQVADEELMKLKKELMNTKNDLEAAQSKIRSLEEN

LKQSALNESKLELTIRNLGRESEERDRASMSTDSQYYEIETLYKSSQDRETRLKQELQS

YKNRLEKLEADYRKLQQENVDLRAKVNSQNKKIRDLQAALDRADKEKKAAREELMNAEN

SIADLEVGLENETKERELLQKQLNDLNERLAKARKDILERDQTILELKMELEAAQKDLA

EKDNLVESLKAGKELLQNELDNAKAEVVAMSEENDALKAEEAQKRQEILDLNNKVNDLE

ERLAKLASERDRAMADAKEGAVKIGDLEAQIRDLTDERTVLEETVSDLKREVATLKEDK

LDIERQLAELQAKIDYFEKELANKDSIIADLKNKNDELEKQIELLKKNLRRLEADYEAA

LQKNKNLDKSYQSANERIALVEGAHDTGRDKCRRLEEENANLKKKLAELNVSVKVSSER

EQDLNQKLEQAQEKVSQLESLPPVEPMFAVETESMVESAPGDDMEVAFLKKDLEDMADK

CKKLEKDLKKAQESKAQLDRQLDDRDKKLNDKDDDILELQKEIQELKTRLQQAGDKTDG

PGVVDSLRAQKDALERDNNMLRQELSSTKTSLTEVQKRKRDLENEVFALKRKLGDVELK

LNMANAEIENMNQEVINSQKKIANLEDQLKKSQQAQASLRGELDDLRDRLQRTKASLLS

AQKQVSDLTSTVENLKRELNDRDNQIQWLNNNVRQQNEEIAVLKLKLANVKEENDRYAD

QVSELNGQIQEKEAKIHDLELSLTMLRADNEKLRKDLADANARAADFKNKYLNALKDIQ

RLQNEKEIKNQKIYYLENRNKALEADKSRLKQEIASLKKRMSELRIQLETSRPARSKPD

VIVMSNVSEVHSAPPSDMFGVSSEPPATSKKLKELEAAHKKAVRDKEYANRDLDNLRSK

LAKAESDLADSNRSRNAAEGDRDWKAKRITQLESALNDLQSKDVVDADEAGQWKNRAAE

LEQELQKLKNKLTRVEAYNATYEEKVNDLGNEVVAARQKIAQLESSLDDGRFKFEEKQK

EVLEVSKKLADMEAALQTANNAKNDLQREILSLQAKLDTKEEELQTEAMQHAQTKGAYD

QAKARNENLKAEIAKLQKKLRELQQQYDARMSEWSEGKFTIDRLEDENADLLAELEKLR

REIGTLRGDLDNAATEKRDNQAELMKMAPQVQDLESQLQNTQEDNAKLRLELASLREMY

TEVKTRYERYESETVIMTQSTAVVESGVDMFAEIDGDVKGENDRLNADLASWQNKFSTL

QKDHDTLFVDKQRLDDKLGDLQKKLNLLENSSQTLTSDKNKLYHEVESSKRKNNDLQAE

LEAARQAKNKLQEENDDLQKRLIQLEAEHEIHLKTHVDYGDSAPYAALQEAYKRSHERE

NELQQELLAAHKMISNLDHELKATRERVEAVQVSYRTVEIKCVTLREEVVTYQKRVSEL

EEKYEICRERNEELEDELTVIQHRVSEIEDENKINQETKASLKVEVTTLRTKISRLEAQ

LEDAVLEKDHLRLQIAAMRSKGDAASDNDVSRQMTDLRNRSDDYRRKIDDLQRSLSAKE

REQQNSVNEISNLKSEMDDLRKVKHLEGEEREASGNGVDANLDDFMALDEALAGGGDPM

ESTRMDYGVEDDTSTQRVVVKRGKGKQPTA*

>TRINITY_DN2512_c0_g1_TRINITY_DN2512_c0_g1_i4_g.45459

MRLPASFLAVVLVLVLASVQSPTTDAQSCNGCQSCVPKCIGPKGDRGDRGIQGIQGSPGL

PGFQGPEGLPGPRGEKGSKGEVGSRGLQGPRGATGRPGHPGSPGVPGTHGTEGPKGEPG

DPGCNGTKGDIGPAGNPGNPGNPGSPGGQGDPGQKGEPGRSRVDDKGVKGEPGPPGPGG

PPGMRGDTGPQGPNGVAGPPGVKGDGGTKGQKGEKGSGGIKLQGKKGEPGEKGLRGEKG

EPGRLQGTGSNTSNIIIGPPGQKGENGTVGPQGEKGEKGQMGQKGEQGGPGKEGPQGEP

GNNGEQGMKGADGPQGPTGPPGGNGDPGDRGETGSTGPPGQAGDPGVPGPQGPKGEKGQ

ATAGPPGPPGNVGDPGAGGFPGVKGDQGPQGKTGPPGPPGEEGPRGHKGDPGPAGPPGE

PGSVGEPGMKGPIGKPGDSGAEGAKGEQGSRGVAVQGDKGMDGPQGERGDPGEKGDQGL

RGPPGKNDFGPPGDRGEKGDQGPKGDEGVPGVRGPKGEQCGQCPAPAPGQKGETGKVGN

TGDPGDVGATGEAGQPGPPGADGPPGRSGVDGQKGERGDEGAPGFPGRKGDKGEVFRIK

GAPGQKGTPGPPGKTGDPGESGTAGPPGQPGPQGPPGQEGAKGERGADGLPGRNGNQGF

TGRKGEPGERGDAVQGDKGIMGAKGQKGEQGAPGDIGTSGEKGDPWNAVGQIKGEIGKK

GETGANGTKGEQGPQGDDGPPGPKGANGTKGEPGIAIKGEKGAPGDQGNQGNQGVKGDD

GLDGGTGVRGEDGAKGDQGPKGDKGTAGATGLPGNTGKDGAKGNKGAKGEKGGPGERGE

AGKDGPQGETGESGPPGPPGLEGEKGEKGDSVTGAKGDKGLDGPPGKPGEKGEPGDDGA

DGARGEIGPDGPRGDQGDKGDTGFKGQTGLPGPQGPPGESGNIGEKGLPGFPGDPGPKG

DTGAAGGEGTPGEKGMAGPPGPPGATGRIGFSGDKGSKGLKGIEGPPGPKQNGTVKGPR

GSKGEQGPRGPPGENGAIGTNGDKGDTGPPGPQGPQGPEGGPGANGPPGPPGQRGLKGE

KGEMGAEGTAGAKGEPGDTGAPGADGLQGQAGDPGDPGLPGKKGSSVQGPPGPTGPPGE

TGLPGDPGTEGPKGQKGADGPEGPPGPRGPEGLQGRAGEKGDRGSPGQVSLVPGPKGAT

GDPGENGKDGLPGDKGDTGPPGESGSPGADGIQGPKGDQGTEGPRGSTGQKGATGPVGS

TGEKGNIGPPGETGARGDPGAPGADGIDGLRGEKGDTGVAGATGPQGEKGNTGDQGISG

PPGETGSQGPRGNQGDPGSPGAIGPPGEAGPQGPKGAEGLRGEPGLPGDPGPRGEQGGR

GSDGSPGEQGPQGTTGFPGDAGDKGEKGDEGPEGAKGDAGIPSVTPGPRGEKGDQGFAG

IEGQQGDPGVQGEPGKDGPRGDRGEPGDTGVPGPKGDEGPVGLIGDKGDKGSGGLEGLA

GPPGQAGPPGSPDFGFYVTRHSQTIDLPNCPENTTSMWDGYSLLYVQGNERAHGQDLGS

PGSCLRRFSTMPFMFCNINNVCNLASRNDYSFWLSTPEVIPMMPVDEESVRPYISRCKV

CEAPSMVMAVHSQTRDIPRCPPSWASLWQGYSFLASTSAGNDGAGQLLSSPGSCLEDFR

AHPFIECHGKGTCHYYGSTYSFWLSTVDEDDQFRNPDKQTIKNGNLRNRISRCNVCMKL

YDNGNANGNGNGPDIGPISSIGSRRRLHN*

>TRINITY_DN261_c0_g4_TRINITY_DN261_c0_g4_i1_g.30938

KKKKKKEKRRRRRRRKQARKKDRKKLKKLMRFVMMTKIILLALLVLLATDGTKGQCGRDY

SLFFSKRATTDYVAVEGMPSLGAITACLWMRSDYRLTGSNMLVIFSYANSHSDNEFLVE

KYDTRLKLLVGGQSASVPETSANDGKWHHLCATWKSSGGSWNMYMDGKRLGGGSALNVG

RNIGSGGLLVLGQEQDSVGGGFNPIQSFVGDLSGPNVWN

>TRINITY_DN268_c5_g1_TRINITY_DN268_c5_g1_i1_g.30863

MVSFANAGVKLSHNDDLYRGGTYRVICTVTGEQFDGWYGPKGKITTDRAKSIHMETIDAS

KKRLVIASPDRSDGGVYTCKGSKASAKYTLSLLVVSTPDGNAQVLQLHQTGVIRIDAGG

YPTPSFVWKKDDQKIDVKGRYSVRADGSLVIKDVQASDQGNYTCSSSIYDGRVEEKKEF

DVKVYETAKITKHPKKDRYATEGYNITFVCEATGFPTVTYTWKNPINSVIKTFGRYHVD

KGILTIENVQPSDKGRYTCEVTSGDGKIQRAVSEIVNILVKPEISVYPDRKEIEVAPGK

ELRLECKVIAGSLPVNIRWTREGKEYEMQQKVGSDTTVINIDPIRVLDGGLYVCEAYNG

AQDASGNLITVTKSIQVQVISKPVPNTILSPSAVYSFLGNELVTNIRCNFYGFPPPEVT

IYDNRNYKVGNGTQEAVLRLYTNVLEMFSTYRCYGENIYGNANHTITLKFAEPPSEPRN

LYTNATCNLAMILWDEPAKDGGMPVTEYVVGYGKDREDEVVQNVDGQTDDFTIPGLNPE

TTYKYSVKAFNRAHTGLIARGTIKTTKYCRPSRPSIVEPEAEMLEDTKFTLKWRAPKDN

GGDPEITYKVRYTPYLDSGELGMTLELETPELEVLIVNLDMQTKYKFEVVAVNRGGESD

PAIKEYQVPSLGARTSRSCVLSASLPLMATAMLSCLMRRWL*

>TRINITY_DN272_c16_g1_TRINITY_DN272_c16_g1_i2_g.32023

IREEVRRSISSEDSRKKMKCAVVFLALFVAAAICADDPYREKRWLIRKCSSQSADCGKER

CCLLGKFCSPKLPKYSTCYLSSLTKCGCHDGLACRVTKEITILGQKIPFRQCVEPTRNI

DVETLSDEEVTAPNREKRFLIDKCSTESDCGENRCCLFNKICSTKLPELSTCYLVDSVH

KCGCANGLECKVTTTIKLPIVGTEIPIRQCVKKGE*

>TRINITY_DN2851_c0_g3_TRINITY_DN2851_c0_g3_i2_g.53292

MKTEVVFFVLLVLALTFDACNAGDEQSGLCHKADGFSEALKTLAAEHEQQLSAQRSACLK

EAKNCKDLLDAGMTADGVYTILPDDQAALQVYCDQTTDGGGWTVLQRRVSPFDTSFNRK

WEEYRCGFGNLTGEFWLGNDNIHRLAANPVSFRVDFHDGGNELYAKYENFVVAGADDKY

RWNMDSYSGTLANAIYGRTWHKWHVQVEMQFSTPDSDNDNCGCQCAHSSGWWYNYCGLA

NLNKEKAPQWIKDVSSTEWRWGSFSEMKIRPSSH*

>TRINITY_DN28715_c0_g1_TRINITY_DN28715_c0_g1_i6_g.937

MVEWTRDGEEIPQTISEGNSVVTIQDASAGDIGTYTCKARNGLTGPDGKEIASTVQVEID

VTEAPKIVSPASGNVSLSVGESYVLNCSATGIPVPQVVWTKDGQEVPQTSSEGNSVLTI

QDASAENIGRYKCEASNDLRDSDGELLVDSVNIGISVTDAPKIGVLPQDVTVSVGENIT

LNCTATGIPTPEVVWKKDGAEVPQVKGPGSSVVSILSSTADDTGNYTCEAANGVNGPDG

DEIVATVDIQIDVIDAPKIVSPPAGNVSLSAGDSYVLNCTATGIPPPLIVWEKDGEEVP

QTRGDGNSVVTIQDASADDIGTYTCKVTNSLTDPDGKLIVDTADVKISVTEAPKIVSPA

SGNVSLSVGESYVLNCSATGIPVPEVVWTKDGQEVPQTSSDGNSVVTIQDASAEDIGRY

KCEASNALRGSDGELLVDSVYTGISVT

>TRINITY_DN29130_c0_g1_TRINITY_DN29130_c0_g1_i1_g.19681

MKSFLVVFMVTCIVLSGQVWGDDLNSFDEEEERNPKRIADLNSFDEEEERNPKRIADLNS

FDEEEERNPKRLAAATVIEGATLGLSVLTTVLDAIGSVNRKIAIGLDNESGQTWNQATL

HFVSGTSDKVLPYELENGYAVLFPARKTNGPVARGAVGVMCMCAADKKYTVCVMYSVPY

DYNLYSNWWDVKAYTGCGIATDGVYNDLYYGNPFKGDSAWKTRDLGSGLKMRGAMSASG

DCTLEIHVDRK*

>TRINITY_DN295_c0_g1_TRINITY_DN295_c0_g1_i5_g.31922

MKFALCFALLCAALSFGEALKCYTCQSTDSWEKCEEIKKENTCGSGQDRCGKVEMRYEAG

GISTKIFAKSCETKQDCDNVKVILKACEAAKDAGADATCIVSCCSGDLCNAGAGAVVSV

ILILACAFLALFQ*

>TRINITY_DN30443_c0_g1_TRINITY_DN30443_c0_g1_i1_g.123826

KEVENPPECIIQHPGFRSVCIDRWSLRQAAGKYRTMERKRYKQTGLEETYLRSVSYREFT

QLVHGQIGSLRIQLPACAYHCIRKEISDPTEAFHGYEDEDED*

>TRINITY_DN3118_c0_g1_TRINITY_DN3118_c0_g1_i3_g.38001

MVTRTFLQVLCLVLFCYRSNATDYNVRVRTHGDAFAGTDADVWIKLAGEHGNIGQKELEN

GHNNFEKGKTDDFTLRGLSDVGRIKYIELRRSDAGTWGDWKLDWVEVAKSGSNLRQRFR

YDGWFPKEQWKTIPLNSCSGGYKIVGQFCEDIDECQEQGHRACPDPSATCKNTVGSYVC

ECPTGFKNVGGYCNDINECDQNECRSNTECTNTVGSFVCNCKTGYEPKSSTECSDIDEC

ARPASPCSETSTCHNTDGSYACVCKTGYYKPSPDSDCVDVDECQQQNNCQPIGIATCVN

TVGSYRCTCQDGYENQTPHQCVDTDECAGSNVCDPNKSVCRNFVGGYSCACKDGYRQGS

TNKICEGVVCPALVYPSGGRLDPSRCTQNNANRYQDVCTVTCDDGYALEDPQNKAYTCG

SQGRWEGVKAVCKAISCPALSAITNGGAWPDTCLTSGRNYGDACSYYCNSGYKLVGDAS

RSCTKDGTWSGSEPTCSKDVRVPWISCPSNIFVDLEQDKSTADVSAMWKEPTSNVQPIA

IQPSNLGPQFQYPTGQTKVTWSVTNSAGSASCSIYVTVYDKQPPTVQGCPTGKIYKETS

EKETAVTWTEPTFTDNVGVTEQESTHKSGHVFMTGTYNVYYKAFDAARNLATCEFQVVV

KRKGCSVLSPPVKGSITCNNFGGTYFCTVTCTPNHQIFKSPSQYQNFWSCDSTGTWTPD

APVPDCVEAAPNDGVTPCPDGQVRMDVQVFGQAQKYCGKCPTGMYFKMSECHICEAGKY

QDEHGQLSCKDCPQGTSSMPGAKNGNECTAPCAPGKFSVSGLGPNCESCPFDTYQSKAG

QSSCEPCPNGTNTEHVGATRPEDCGVDPKITAILPTSKTIKENTDVSFECRGTGLPRPK

FFWKFLQDIPADFLGKMTQQPIKDAEGNSVGATLLIQGATVKNTGSYECAATNTHGKAV

DLAQLTVEADLGFGSGGGQI*

>TRINITY_DN31932_c0_g1_TRINITY_DN31932_c0_g1_i4_g.18757

MNNFLNVTGDVTYYHGKVNLGDLGIEGSKPGAAAAGVLLAHRVIGLHKHGYGRILAECTF

TAKILYCAWVTMAKPHDNYIVVLTQGFPPGDPQKYIKFIEERILNKSNEELLQDKEAMT

FLREVGPDTLIPCFAVNLKGNTDVERCNRINDYLFKHLVHTDADMTAQRTPLIVTSSTM

SHHRHSNALNHFKQRLGLDTSDTSVGVKYIITTCLDPWTTSMDFIDDMVVIMRNAIRCA

IGKTLEGETFHDFVSTGTVDNAGSVIVSYNGCFQPNHEYFTMDKLRFIEDGATRDFRAK

IQKVKKIDQPIVFRNKYPDKLHDILLFDPEEGEEERSERLEVFDVFVGFPPSGTKVLTA

NMKVVDVPRFIHFDPTITNYPQFSIYFMYGQHNHAYISHVPAKYPDFEQLVELVEAPAG

VTPMILQHGIRVQLPDVAGKPTVDGSGKVINPLTASQYRIKFIGENGVEMVSTMTLRQT

IWFNGVMKPRSG*

>TRINITY_DN3307_c0_g1_TRINITY_DN3307_c0_g1_i2_g.91834

MVAACSRHTLYFLLWISSLCVSQGLSEDLQADANPVTGESHRVRRQAGSQVYRLPRSQPD

LDANGIFYNETLPPKGEPGRPGVEGSSGLPGVQGEPGGRGPPGRSGNTGRNGPPGRAGP

PGPPGQRGPNGITLIGAPVGTTLTEEEVEQIVTIYNSMQQQVASGNKAVGMLGPTGAAG

SIGEAGTPGFPGEGGPPGPKGALGEPGPQGPSGPPGDPGRPGVPGDEGSPGPTGPPGPP

GIKGDRGPTGQIGMMGRKGQRGGRGQQGQKGARGLTGEQGPPGMSGAPGNNGERGPQGN

KGSTGSAGDAGPKGMRGAPGQQGAPGQKGAAGMPGSQGLPGVRGARGEPGQNGAQGETG

PSGEPGSSGRQGNQGERGAPGVVGPPGASGPKGSTGPPGRQGGQGSPGSRGLKGQPGND

GLAGPKGQQGPPGPDGSKGPMGAAGNKGPAGQQGERGMPGMQGETGDEGPRGPPGPPGI

DGARGSSGAQGMPGSPGQRGPRGDAGRPGPRGRKGIRGEGGEPGPPGRQGGRGATGRAG

ERGSPGLPGSPGAPGYAGNSGPQGAPGQAGPDGAKGSSGPPGDQGPTGNPGSDGDRGPD

GAPGGRGDSGPVGADGLPGPQGAAGDQGAKGPSGGQGLPGRAGNTGRPGSKGPSGAAGE

KGPSGDDGAVGRDGGPGQPGANGEPGPAGAPGPAGSRGDRGSQGRPGPKGAMGPRGAPG

SPGSPGPSGLEGAPGSQGPAGEKGDSGPSGDQGPPGAPGEAGINGNSGEQGRIGEPGEK

GEQGESGAPGTPGRDGMAGARGAAGAPGPAGEAGPQGSQGERGPRGSIGREGSPGELGR

VGKDGPMGPPGTPGEQGRPGQDGPKGNRGESGGPGPAGAQGSPGAQGSPGGKGPRGAKG

DAGESGLPGSKGERGAPGPAGEIGPAGNPGADGEPGRSGANGQPGQAGPTGSTGSLGPP

GSIGQTGFPGQQGVTGESGPVGSPGDPGQDGANGRTGNPGRKGENGPKGEQGEPGDNGR

AGSPGARGANGARGSKGEKGNAGGVGAPGVAGQPGPIGATGTQGPQGVRGQSGEQGEVG

NAGRDGDRGATGAQGAKGIQGAQGGRGGVGTKGHRGAIGPPGPPGPTGDRGDAGDEGGR

GARGPKGLQGLRGEPGPQGLTGSQGLQGRSGQQGQRGGDGETGPKGRMGPVGPPGEPGP

PGVADIFSPPQRRKRSLPTTAAEEQIITFDEKINDILEMFEEIIRPSGERDSPARTCKE

LMQLDPSLPDGYYWLDPNGGAVEDAFKAFCNFTAGGQTCLSPKTPNTFAYDPVTTQFKF

LRILSKRGEQKISHDCPGSDQDFRIIGFNDEEVPMNSHNCQGGHRHSMAVNSVALLPLK

DVTMQEQHLTFDLGPVCFQ*

>TRINITY_DN348_c0_g1_TRINITY_DN348_c0_g1_i20_g.105236

MQFKLLSLCAMMVIFGIISSDAELIAYPHVGCYEGWRIRRYFNYDLGFWRGDDAIMQCYQ

AARKEGYKVFAITEGKCLSGDGAEKHYTSFDKSSKCNDKGTGGRNLYDIYLVAGGKQSC

EGLADGEYQDTTFCNRFYTCTKGSANVQLCPEGLLFNPANRECRDAAPCPRGAPCMYAP

DGEYIHPTSCRKYVVCHKGYAFEASCPAHLWFNTDTKECENPANVNCRHDPCMETPCLN

GGECKTSSQEQRGYTCVCKAGFTGTRCEKEEPKPCSANPCKNGGKCKDLGGNKYECSCK

AGYGGKDCSEHSVLVGSKILQGHSDYTKQLEDYLRTVEMHGKTWKLCFRASENHFLSSS

FHAHCNHKGPTVVLVRVGQYVFGGYTDRDWISSSAYTQSVRAFLFSLKNHLNQPFKSYP

YRHHGNAIYSNNGYGPTFGGGHDLYLANQCNVNTGSYTNLGHTYRPPFGYGYTSSQAKN

VFAGSYNFRCDEYEVFYQA*

>TRINITY_DN35676_c0_g1_TRINITY_DN35676_c0_g1_i1_g.67356

MATEVVTTTTTTTETVVVKTEEVVEEIKSNENHIDETKPQDGQEDEKPEIVEEQPKPEEN

GIAQAKVRLDQHPPWSKIPSPLPECLAVETYLRMLKIPYESSYKSTPDWSKLPVVAYEG

ATQRQDIYDFVNTKFGVDPDSHLDEEKKAVSRAFQLMVGESTAWSLVQYRWIDNYAETK

KYYKGKGLLVPDVRTKMEKNKCSKCLEAHTIGKHTKEQIYSIAEKDLRALSTFLGGDKE

YFMGDQPSAIDCTMFGLLANFVYAADTENSPQRKLIEDELTNLKDFCGRMKNDYWLDWS

EVCSDEVVEELKPKKPSLRRKKRTKSATDAKGEAESGEKAENKKEENGEKAEDGEGAEA

AAEGEPAAEGNKEEEEAKEGEEAKEEGVEKNEDEASANDGEEASEPPAQDAE*

>TRINITY_DN3883_c0_g1_TRINITY_DN3883_c0_g1_i2_g.4966

MPTTAPKRKKRPVNGGGAPTYTESEMDEFLKRQSLYRKPIAKDGSCLFRAVSEQVHQSQA

NHLDVRKACIEYMRKNKEMFEEFVEGPFDHHLFRLQDPKEWAGQVEISALALMYKRDFV

IYQDINVEPTKVTDNGFEHKILLCYSNGNHYDAVYDVKFKKNAAFCQALVYELLYKRVF

PELDRRDQGRKGGVRTLQEPLGFSADLYENGNIPDEFRENGNDDNDGWTEVKSRSQKAK

SARQNRTVEQEEARDDNSLRQSNEQKYQWEIHRSVDVEQYRNVAIEVWEEDKNNQQRQD

LAIAASIQYEPNDKCFVNLGPPKVPEEKLYSAIVKDICTSQGYLQVYVIELGRRLTVSV

QCLKPGDGHQAYKDLTGYYRKGGEGGSPCGDDGFKDDGRGRRKKGIQRGRRGFNKGDEQ

EEGAQRRPYQDEGFGRPKPGGQREKFNPRRGRPARGREDRTQREEEDAKYQEQMKLEEL

RDKDPKSFPFLPTQQTEKKPSAPDTPVVTAVVTPVVTSSATTDAAEFWRCRRNQKAKEA

TSPNASPVMSPTATDVKSSTPGSPESKVPLSPTPLMPGSPEVKVHTAPAVPTSQQPAPT

QLPTKDESSVAKATKDIKSKAADEGAKQLAEAKSEVKSSKDGENRAEKETVFEKGDKEG

RNETAIRDDSEKGGELRTEEAAPRTKESAVDHGGKKAANAARSGVKGAEVKEPEINAPE

VNAPEVKAPEAKALEATAGAAGLSFPGTSPVTHSAGMHPTRGGGVVAFHGEDIATEIKP

IEVKTNVAAADTGPKTLLKGLSTSKANTPNLSKESQGPAVPQLERSAVTTSKLVPEAAK

VGEKTWPQEPISAKPEPFKSELPKGQDGRPDGVQSTRLPHGEVVDGVFKPYTDEKRLHK

KEDAMPDGLTKPQPLISADGGPSEKKTVKFADPVKEEIEHRSFTVVPKGMLAVDLAAHA

RNSPPNSRKSGKNTAGKNGTELARKGPKPTSPVPGLIPQDLPAVAVLPANQTEKNLSEE

RSNRNNSSPDSTTRQPTVPPATPEPLLNADVGIPPSVSPQPPFQMPYVPIQLPTTNLTG

PVQFQSGMSMDPSGSDLPQDVSTLRFFYNLGYQYFIGLQSMMYYPMWPSAQDHMQQQTP

VAVSVGQQHYPGMQGMQPMYPPQPVPGYHTVHMAPGNPEMSVASFDRSSSDRSSPAQQT

GQQVPTQAQARPQVLSAQQQQTVSLHPQQSAFINQPWNRGFKRSHFLPHTHQPRAHAPG

NLGNPKPYKHKQKHKPRNDAQPPYAAAASQFHGHSPAQFGVTGFPTGAQSSASTSSPNF

YLPDHGGMKGAGAEATLGAQPYMNYPGMHPGPHTAANQRGQFS*

>TRINITY_DN3898_c0_g1_TRINITY_DN3898_c0_g1_i5_g.4793

MRSTQWWAHAKTRIWHASQDTATVLRFCRVWILWITVEILRYFIRRISQVRSHELEQARL

NYFRGTACDVHYANRILIGKHRELSTSLLSGHQSCEHISIITHPRANPFEVFFSAGCSI

HVISSSHSIQSGFRIVWIVLKGSMSVTSDSKDTVKAPIDKIWAVTGNWSDFSWILKAVS

VKVNGNERLIGYEDGSAVKQVLLEKNDAGHSLKFEIFDSDTPSKVMAHASKISCEMSLV

ALSAEETELHWKTEHHLKAGQDEEAIKTKIGGLRKVMLEFFKAKFEK*

>TRINITY_DN39562_c0_g1_TRINITY_DN39562_c0_g1_i5_g.73233

MPSYKVIYFPGRGRAEPVRMCFAAAGVKYEDVRIAGEEWAAFKPKTPFGQMPLLEVDGKL

LAQSGTILRYVARELGLAPTDNWQMAQCEMVVDGIDDIGKKMVEFYFCKDEEKKEELKK

TFFSEFLPAQMAMYEKLLTSNKDGNGYFVGDKLTFADIVFFTFTNSWLGQGKMEVPEPM

KPFDKLVAHYNLVMNNDKINARLKARPVTQM*

>TRINITY_DN3976_c0_g2_TRINITY_DN3976_c0_g2_i2_g.33881

MKHSHFVFREKAEESGETGEMLLRQLSVFLVLAALSHMAQAKTPCEEGEAGGGYRVMNSA

DRSELNTDQSSVKCDDSDRLKPGWVRFEGAAGGTVMSTARPPDNRCETHAPGYLVGGHP

AYEDGTVARKVCFGWKVNDCLRDVTINVRNCGNFYVYELEAVGFCKLRYCTNPSAPAPT

PPAPTTAPVLPGLPSVFLEVKTRAVPGANGGKRVEVYAKCSLLEEPPKEFEIEAYWVID

GKQVPFNFSREKKNYELKELEEGFKAGTTISCQIRGRKEKGKDNPWSAYVKSNEIYTGI

T

>TRINITY_DN4004_c0_g1_TRINITY_DN4004_c0_g1_i10_g.34896

MKTLAVLLFVFIASVSGGCYNANWWDLLDKKTNVWATCNLNKKAKYITGFWRSANGGMFD

ERVGRLEVAKCCCPAVAYTATANAACVNANWWKSLDKNFSWSTCPSGHYLSGIMKTGAN

KWLHNIEEGKCCKPKGHPANWGQCVDKDVTHSFDNKGWSECGTGFYLVGLYRGGCDKLQ

CIEKFKCCKMVDPGCDA*

>TRINITY_DN4023_c0_g1_TRINITY_DN4023_c0_g1_i1_g.35045

MSALNEIRRNLRGKLYEDPDFEATDENIFFSQKPPRPFVWKRPHEIVDDPRMFVGGASRL

DIKQGQLGDCWLLAAVASLTQFPSLLEKVVPKDQGFSKAEGYCGAFRFTIWQEGAWTDV

IIDDRLPTYNNQLVFLHSDEKNEFWSALLEKAYAKINGSYEALKGGQTSEAMEDFTGGL

AESIDLKKAPADLFRTIVKALSKSSLMGCSLNAVPGKVEAKGPMGLVRGHAYSLTGANK

VNVNARGRQIEAELVRVRNPWGNSREWEGDWGDKSPLWSMIDDNQKKQIGLVFDDDGEF

WMSFADFKKYFDKLEICMLGPDSADTGCGKAWEGRMEQAKWVYKSTAGGCRNFLDTFWK

NPQFRIELKDPDDDEDVDNCSFVVSLMQCGRRKMREQKKGMLTIGFSIYEIKGDTKVGP

DGHLDMNFFKYNSSVARSPVFINSREVTGRYSLPPGEYVVIPSTFNPNEEGKFLVRLYS

EKPADTKEMDTETKTPPAHERRPKLTKDQKGALNSKFYDSFLRLAGKDGAIDANELMEI

LTKVYGGGQDFSLEVCRSLLSLHDDDRSGKLGFEEFMEIWVLVKKWRAVFDKYDKDKSG

SMDLYELRAALSDLGISMSNRTTNAVCVRFRNARGTIDFDTFVQIIARMFALNDAFDDN

RMGSKASFSREEVGLIEVSFIPNHTSMCTDFTFLRALFLFSFDF*

>TRINITY_DN4091_c0_g1_TRINITY_DN4091_c0_g1_i4_g.34642

MGTRVQFQCGVLVLLLLGVAATDFTPPLDTADFVEEFQILGNLLTDAQTVGMCSSRPLPY

TDRVTAADVAFDLARAGRITTSSDRLFPNGLPESFVIFVTVKAETNSSGDLFTIYDKDQ

HQLSFRLNPIELKYRDGKTASKVGYPISIADGKWHRIAFALSNDSIQVILDCDQPFDAL

PRPENFKPQLRSSGKIALGGRTGTFKGTLQQLLIVPDPSLVNRYCTDFTPSCDAPLPYA

PFLPVRAANGFVEINNVRYFKGDRGPNGPPGPPGAQGSPGTRGFNGTVGNPGPAGAAGP

PGDPGPPGPPGNPGQGIFVNWRRLQASDEKGPGPSGPDPVVVPPAVPGEPGPPGARGPR

GFPGRRGSAGDKGPQGDPGPLGSPGSPGSPGQQGRPGRRGSDGPDGPRGPPGPAGPKGD

QGFAGMAGMTGHKGPMGLPGPRGEQGDKGEQGQRGASGEQGQPGLPGERGIPGEPGERG

PPGSRGSQGTSGERGPPGPSGPVGPPGQPGVQGAQGLIGPPGPPGIPGQIGQPGPKGET

GSSGLPGLPGQDGMPGYPGAEGPPGAKGDMGSAGPRGPQGYPGLPGEKGNRGRRGPPGE

KGDEGLSGYAGAKGDEGPRGEDGDAGAPGLPGSEGPEGSKGRSGMQGSPGPAGAPGPKG

ERGVPGLPGYAGEPGEKGNIGPQGARGRDGSKGARGNPGPPGAQGQRGRRGPRGERGQD

GTPGTPGSKGRVGEGGPAGDPGVPGPPGPQGDRGATGPKGPMGLPGKAGQPGFPGPRGE

TGSQGAPGQAGPPGMPGPRGAQGERGDPGSQGPSGQPGATGEPGSSGDPGKDGDKGDAG

KPGAPGQDGPQGRPGADGPKGIMGPPGAPGQRGTEGPPGLPGTPGQSGPRGPPGPSGPQ

GQRGQPGQPGPAGGQGETGNRGEDGERGEPGPEGQPGEPGNSGEDGPPGPPGSEGEKGN

QGPAGAPGKKGERGPKGPGGAPGQVGAPGRPGNVGLPGDQGPQGAQGPRGEKGSDGGRG

APGPPGQTGVPGVPGQRGQKGERGEGGPPGAVGAAGPRGAQGPAGAKGEQGETGAPGDD

GRLGEKGDQGPKGRAGASGPPGADGRPGQPGSKGSRGDPGPQGAAGARGPPGPQGGRGR

MGPSGPPGNQGPPGAQGAKGSRGKNGVDGPPGPPGQRGAPGARGDDGLPGAPGVPGETG

PRGFAGTDGETGDRGDPGPQGPPGPPGPPGSQGNSGPQGSQGERGPTGPPGEPGPQGNT

GMQGSRGAPGAKGDRGQDGPQGEKGDKGWPGFIGPTGPLGPKGETGDAGPPGPSGFPGE

KGNKGEAGSEGAMGLDGPQGVRGRAGALGPKGNRGPQGTRGDPGSQGPPGPPGPPADIG

PFLGGLLSGDQGKGNTRRRRSIESEVPEDEFIGAVESLREEIEEIRRPKGTKDNPARSC

KDLMLCDRNHGDGFYWIDPNHGCVDDAIQVFCNFTAGGETCLNPDVNTRMAMRKKWRKM

EGAEWFSEFDGGYEISYSKVGKTQLNFLRLLSEKASQNFTYYCGRGAVAWWDSASKSYD

KAIRLQGDNDGIFGYKKKGVAIKVLHDECRDNREGKAIFSIETDNLNQMPIVDFSPSMQ

DNSDEFGFEVGPICFK*

>TRINITY_DN41089_c0_g1_TRINITY_DN41089_c0_g1_i1_g.45001

MEALGKNSQIFLKKPPNTQISKVVGMQGRSTLGGSPLVKWNRSAWLNSKNLTVVRHPGHV

SITLVTLWVACHQIVTMCGYYMRESFNVKPRAECVETFPTGERKPSKFNNKKACEENGG

TWKEFTNFLEKATQYTDQQSCRNAGAQYTWGIPFGKMEPECLVKLEEPDCRQAPWSRVN

HLGNTLGGLPSNYSWTLPYFPSGEDQRCVFRMRYNISTDDYDASNTDSSSNNQLIENNP

KVDIGVLKTTLELAINTAQFGRTFQDRTHLIKLRGRQKYNVPDDKDIHNLNVRGKRGNI

VQVYPAV

>TRINITY_DN41407_c1_g1_TRINITY_DN41407_c1_g1_i1_g.28498

QNGVCVTANWKTLLNGKNIWALCPSGRYLQGIYKSKRQWVSNIERGRCCKPPGHPDTWGE

CYVHDVCSSFSKRGWSSCKEGYHMVGFFKGACEEINCIEKFR

>TRINITY_DN41992_c0_g1_TRINITY_DN41992_c0_g1_i2_g.90602

TNPAPQHDGKDCEGPADESRECNNQPCPIDGAWSEWSSYGNCSVSCGGGVQSRTRTCTNP

APQHGGKDCEGPADESRECNNQPCPIDGGWSAWSAYSDCSVSCGGGVQSRTRTCTNPAP

QHGGKDCEGLAKEKAECNTQAC

>TRINITY_DN4322_c0_g1_TRINITY_DN4322_c0_g1_i2_g.43308

QKTIEEIESHSAMNSNMAVLLFLLALSPILVNGLLDNPETILSNFKDKYNNSQSDLIFLL

DVSGSVSDYGFRSEKIFVESLLNEFSLAPYSTRSAVITFGNVIKTDLNYIDINAVDKYK

QKCTFMPLFQNNVQHRYGWATKMKDAFQEAINLINTATAKKTKRNVHTVTILITDGYWN

YGDPRANANSLKSSGVEVFAVGVDGYSQWQIQALASSNDHALEFSSFTKFRELALYIRG

DAHDKIFMEVPNECTVSSGCDQNAFCACGTVSGQYQCVCRQGMYGAGIPGQCFPCPRGS

YKHEPSPDDCKGCPPHSTTAGTGSTDISQCACWTGYQGDPKLGIECIPVKCSPVQTAPS

NGYLKGSCSDIYQSVCAFGCNEGYTLSGSATRTCQADKDWSGSPPQCDIVECPPLPDIN

YGTKSCSGLGKQYGDRCTFSCEAGYDLNGSSERVCQKDGQWTGTSSHCEPKKCPILRQL

AFGTVEPVDCVTTPQPYQRGCVMRCVTGYEMDGDSPLKCGADGQWIGRFPTCKDTRPPT

ITCPPNVSGGTDPESPTRSVTWAEPQVSDNAELHDASAKPTVVKSPANLVSPHNFAPGV

TSITYTATDKSGNQASCVFTVTIVDDEPPRIYCPANIELEKKTTTPTVKAYWPLPTYFD

NTNLPVTIFTDAVNGSDFSTGEHRITYSATDQANNKAECTFVVLVANVACQPYPPPVNG

AISCKYSGIWGGDQCIPQCSSKFEFSRTPATGYFCLSHGQWYIFDFRPSVDQSMPWPDC

SEEYVPGAVRKGMEWQYFVGDCSDPNVQEQIKKNFIEGLKYNIGQGDPNFCETQNVCQL

DNIKVKCGTTSSSGRRRRSQNVVTIEVDLDVFSKGRDYNVVKVEVEDYVNKAEQDPNLQ

TLKVDGVGDLSVAEVTKHDTFAVCSGGSVFGMNQNFGHETKCQTCPAGDYYKAETDVKG

SCTKCPMDHYQDLSGRLSCNVCPNGRHTLQTGSKNISQCLHACQAGEFSPTGLATCNVC

DIGKYQPDIRQKSCLSCPGSTVTLSKGAKSLSDCGMPCAPGTFSKTGVEPCEPCPAGQY

QDERMQTSCKTCPGSKATYGKGASSVSQCIDLNFCSSAPCNNGGTCSNAADGYLCKCPA

GFHGKNCENEDDECANTPCAKGATCVDKVNGYKCLCPPGYSGTNCEVSGNDCQVGSCQN

NGKCVELPGGFECVCQDGYAGKFCERQVHECASSPCQNGGTCSDKVGGYTCACSTGFSG

DRCERNDNSCNPDSCKNGASCSDTKYGHECTCPAGFGGVRCQANINECASSPCQNNGMC

VDQTNGYKCLCKPSFTGTHCEQEVSSDFDLSFARSNGRGTSIVEMRQELRAFTVAFWMK

VSNSELDPGTPISYAATLSGGSVDDNALVIHDYNGFNIWVNSKKASTNVAANDGQWHHV

AFTWKSQDGHWKVFKDGVKVKHSTAEFQKGQVIPAGGLFVLGQEQDNLGRNFSANEAFI

GQMSQMNVWSYELPDSDIDALSRSAHSHKGNVMAWGDFFLKADGGVKKIVPSTARTANK

CWTKWFNTPKTGSGDHETRPAQACSRPSSYDCQTVEGLSRPELELNITQECSANGIKCL

DSEQWGPRQCPDFRVRYVCPCEANSACSTNPCQNGGKCKTLPVGYECSCPVGYKGRNCE

HAMNCPNIGPIADGHASGSLSPGGRVTVTCNSGFSLTGSKSLTCRNGRWVGTIPACVDI

DECAQGKCGGECDNLVGSYRCRCSAGYILQSDGSCKDFDQCQKNNGDCQHKCVDGVGKY

HCECNHGYQLQSDGHSCADIDECASNGGLGPCEHKCVNKLAGYSCQCNPGFSLNSDGKT

CKAHSCPALPAPSNGKREPSTGANTVHSSIVFECSAGYRLRGSSMRTCNADGTWSGSQA

TCEVLKCITPGDLQHGSKSGSANSYGSVVSYSCSSGYRLVGSATRTCQADGAWSGDHPR

CIPANCGEPAAPANGKVIGSQRSVGDTVRFECNLGFKIQGSSFSVCQSGGSWSPATPTC

QVITCSQPPSLANGGSTVSGLTYGSKVNYHCNQNFHLSGSAERTCQLDGTWSGVQAECL

EHSCGNPGTPANGKKIGENYKYGDKVEFSCNEGYNLVGSTSRTCQTNGLWTGTQPTCVV

INCGDPGMPLNGERHGNEFTYGKVVTYDCLPKYKLVGSHQRTCGLSGQWDGSQPSCQAS

NCGGLLGGSSGVFSSVNYPNPYEDNSYCRWKITVASDRKAMVTFNSFKTQKDKDVVEVY

DGVSGELISRLSGVHNKPFSFASSSNVLDIKFLSDGADTSSGFDATYKEVSCGGRLTKL

DDVIQSPNFPNDYPYNARCVWVVDLSHPFQLEFDSFDTEEGYDFLKAYDSLSSFTGDEL

LFDFDGTRFRIAPVAVSTGKAHLTFTSNGYRNRKGFSLRVKKFTVNGRRRRRRR*

>TRINITY_DN44765_c0_g1_TRINITY_DN44765_c0_g1_i4_g.66584

MSALLLSFFVVLSARSGTEGARCPVTLPQDTPADSPCGLARQKDLAQNQAIYNLVSAEPL

HPFATLNMTEQQLGEIIKKDSFMREYAMSYLGMAKTTQAIFTNYLQEFGQKPITGFEDY

AKIKVFFKAALQLALGDKVRVPSDNEPFQGDFTQWFDDEFYAQQALAGVNPMTLQRVSI

HGDRRCRVKTVKGEWCHFPFEYRGQLYYSCTKRDHDRPWCSTRAKYGKRFWGDCAEEID

KEKDEDHDCTVKTTEGKWCHFPFKYRGQVYTSCTTRGHDHPWCATTAKYRKKFWGECAD

NEGREDEMVDVGLDLNKLSENLNPDFDWVGALKRALDNEAISLKKAVRDAHVYALRYPI

CDNIPTQRPDITDFDPNRTMRDFRSPIVLFVSDPGSIGGLKLVAIQTDHTPDSPVYTPH

DGDSWIFAKLEAQITDLGYSQMVEHLVKVHIVMEAVCVVLKRQIPSQHPLHQILKFHCR

EILVPNTFGTPSLVNENAFNHRLFAYGNTGAVQLIRDSYDSTTWDVTDFRRNIKKRGLH

DKGRIPYFPYRDDGEVILRAIENMVSDYIDLYYKQDENVEGDKELQEFANEISADGEGQ

NGGKGQIKGFPVKITSKKELKETVSRIIWQLSAQHASVNYELVDYATYIPNIPTKIYND

TRVEPGKFSYLNLPNRLTTAIDQRFISSLSTYRYDRLFDYGYELDDQKARDVLYSHFSR

LMLKVQEMLEGRNLERQKQGLLTYPYLLPRWLPNGVQA*

>TRINITY_DN460_c0_g1_TRINITY_DN460_c0_g1_i11_g.9906

MATVEDESTAGKGKVEKTQLIDTHGKKRDHDPTFKGPIKDRSCTDIPCCILFLAYIVGMV

IVGIVAFQEGDPDRLLLPTDSQGKVCGKDYEDRKYLLFFDITTCVTKGGDLTQYVSIPS

CPTPQVCVKECPKKTETGISPAAKDMVCKPGITPTDLTKYDLVTQGKCAPYYLESSPVL

YRCIPSAVGDLLNQNISKANGENVTKDEVEGGISGLQFLLNARNFGMKVFEDVKSVWYW

ILIGFLLTMLLALVYIVIIRWLAAPLIWFTIIAVFGLLIYGIYVCYKKYKFLEESGTST

DFELKFTFNLDSYTQSKDTWLGVGIFLTILLVILLLIVLVLCSRIRIATAMIAESSKAV

SSMLSALFFPIIPWLLQLVLFAWFLGVAVYLVTNGIPKYKVIDVPDNGDPYNLTNGADC

DPMTFEKNYKGTNSSCVLAGYTENVHLFRMQVYHFFGWLWIMNFIIALGQCALAGAFAS

WYFAFHKPDDIPSLPVLSSFWRTLRYHTGSLAFGAAIIAIVQFIRAVLEYIHQKLKESG

QDNKIVTFIMCCCKCCFWCLEKCLRFLNKNAYILIAIYGKNFCSSAKEAFFLLLRNVLR

VAAVNSVTTFLLFLGKILVVGIVAVASYHWFGKLKEDDPSTLHYDVVPVIISVVFAYAV

CVLFFDVYDMAIDTIFLCFLEDSERNDGSAEKPYYMTDSLKKILDVQNRPAEGQGGESA

K*

>TRINITY_DN4703_c0_g1_TRINITY_DN4703_c0_g1_i5_g.1283

MAGRTSHRLLVACVLLLGMLLFEPAVCQECETPIDLGFIIDASGSIADTALKDGKRRNAY

FKAMLDFVNAVIEDFEVGPDDTHVGAVLFSAAVLETVELTTDAAEIKGKVDGFLGRGPG

GGTKTGEAMREMRTRVFTGSGDRPDIPNVIVTITDGKSTDPDLLREQVRLFKATPNTKL

MALGVGTDFDINELQLMATNRRYVKTVNFADIKTIEKIIARAACEEPQLPPPAEVYGPP

GERGEGGPQGTDGLPGPEGSPGGRGLAGTAGEPGRRGPNGPPGFPGPDGPPGTLFTNTF

PGEKGPVIRPLIQYASQALTQGSVGSRGNPGRRGVDGTPGLAGPPGPQGDRGIEGPVGL

MGAIGAPGMPGTDGGSGPAGKAGVPGPPGPPGPPGDTGIAGTQGSRGERGRDGQPGVPG

SGGEDGDMGPAGPAGPPGRDGSNGAEGPMGSEGTRGAPGSEGPAGQPGDTGSPGETGRT

GVTGAPGAPGASGAKGQPGLAGANGERGYTGDRGEDGQRGSPGPTGNLGAPGRRGGRGS

KGSTGDAGPAGEPGADGLAGPTGEAGSAGENGGRGGRGSAGRVGGTGPVGSPGATGRQG

RGGSRGPDGSSGRQGAPGSPGIPGAPGEAGQRGAGGAAGEPGTSGATGRAGALGARGSR

GVVGPKGDKGSSGSSGSDGPQGETGPSGRIGRPGSAGQSGSPGAQGDSGAQGVAGTPGS

RGGAGPDGPKGSIGAQGDAGPSGSRGTTGDGGSKGGRGAPGDRGSPGPAGPPGVTGAQG

EPGEQGAIGNQGREGPAGDTGPSGAPGRRGAKGERGSNGRFGNEGSIGGRGQRGGEGNT

GPVGAPGAAGDRGNPGAAGAPGGRGVAGSVGPPGLAGSIGNRGPDGSRGLKGPSGDPGS

RGGTGEPGASGAPGPNGNAGNQGAPGTRGIAGERGDAGRTGSTGADGDAGEPGDAGSRG

KTGYPGPQGGMGAAGAQGPDGRSGESGAQGNPGPVGAPGGEGAQGAAGAEGERGVRGDT

GDRGTEGRPGEAGAVGLPGNTGATGDRGRTGAAGRPGREGDRGDVGAPGDAGLQGSQGA

AGTPGSPGGTGTGGPTGPPGPPGGAGPAGPTGQRGLSGSAGESGAVGEQGAKGERGDQG

RQGNDGQAGAAGPPGRQGLTGRQGDTGSQGSVGNVGPSGSPGARGAKGEAGATGVVGEA

GTVGPAGPIGTPGSQGTSGADGATGAQGAQGSKGEVGSRGDQGDGGIGGDTGRTGAKGQ

KGDRGSPGVTGPQGSQGPKGDIGPLGPTGPTGSSGARGDDGNAGSLGATGLQGPEGPDG

NVGHSGIKGDQGQRGPQGPPGIAGPPGPPGPSAQAGNLLSSIQDNNNKGPSRRRREAPR

ERQILDDALTAVDLVGYRIQLHTKPNGTREFPAQTCRGLHMCYPGLQSGNYWVDPNGGI

PNDAFEVYCDFDADYTCIYPNQHQNFMTDKRQWFTGSDGYKWLQRDLHGLNMMHYVAES

SQLTYLRLLSDRARQTVTYHCKNSAAWFNEEFSGFTKSIKIMSGNGVELHAESSKKFKP

KVVLDECRIKDGTWRKTIVEVDTPKPHRLPLQDVAVYDIGDEGEEFGLEIGPVCFS*

>TRINITY_DN4796_c0_g1_TRINITY_DN4796_c0_g1_i6_g.1432

NDKNIDDVYSKGFRNLRLRSRADLYDYPYNQAKFKRFLADLKHVVDKCLERGVTPIISWI

HHDAEAYATEEDRKAYLKWWKLVAEHFKDTDNRLSFNLFTELGVDTCGENCEESLRKRP

DKYNKWTKQVVEVIRGTGGKNKERILILSSPGKTGKDLVNIDPEIYRDEQYMMAEWHIY

ASGPNKKSGGAKEWHGDGSGVGQTNVKKALKEGTDFSKENKLPTYFGAWMPIDNYKGEL

NEGEVINFTRFFTSELRKAKLPWSLNVLDHYYDTKKSTWITGKQKFGKFKINVANVLNT

IQKVYGLQ*

>TRINITY_DN503_c0_g1_TRINITY_DN503_c0_g1_i1_g.82125

MRFLHLVFGAAVCAVLGLTDGTVTVLNPKDKVNYGQSLYKSLCTVDGGESFRAWKLPDGS

LLTTTDTSKRLHVESTGTQHFLVIRNVVVEDGGQYECLGTQGSAPMLIQIPFNIQPDQD

QEIHVDRKATIHLAAHGYPQPTVSWKKDGVEVKYSSRVKLLNDGSIQFSPVTADDNGTY

TYTVSQFQGTNIKTGTIKVKVFDKAKFTQKPNPASRRLTEGYNTTFHIKATGFPKPEIT

WWDETNNKQLDPFFQEHFIFSPEGSWTIIGIKRSDKGRYSCRATNDAGSDIAYVEITKV

DVPAKIASSVVDGVKQVGEKAELTCSTEKGDPTPTVKWLQNNQPYISQKFNSDKSVSVI

TFDKVRLIDAGEFVCEARNGARNEKGDQIVVKKAVRLNVVSKPVFNEKAAANVVYSFVG

NSVPVTVRCDFLGYPPPDVKLNAPNGTVLARGNFSASIKVTTGSPSDFANFTCEASNDR

GSDTTDVQLKQAVAPSVPRNVLYEKTCKKITLKWTVPVSDGGMPLIDYVISSDLGSVTV

PATADNMERELAAEFKPDTTYDIEIFAKSRADRSKSVVKSVKTNKYCVPSKPVITSKVT

KVETNELTLKWEAPDYDGGDTKITYKVEWIETSDASGNPMVKDGITGLEVELTDLNYDT

EYVVKLYAVNQQGTSEAATMYFKVGKEGADPEASTGGLSDGAIAGIVIAVILIVLIAID

LFCCFFNSCGLFFCCSQTICGGGGKSNKYKDNNAAEMEKQRLPEDV*

>TRINITY_DN52404_c0_g2_TRINITY_DN52404_c0_g2_i3_g.55310

HKRQTPNLHRRGRTTHRWNIRRVSCTTAAMKVWCLALVLLASYAYAFPVEDELSDEEFLQ

YEENQEDYRHDKVIKVPYKVPVHIDRVVKVPVVKKVTVRVPVPYHVPVPVHHTRIVKVP

VVRKVPVPVRVPVHDPVPVVHTKYIKVPVYKNVKVPVYQPVYHTKHVPVIKKVPVHITR

NKYIKYPDHITHTKYDKYPVRVPVPVVRTHNVKTNVYKKEPYPVHNTHVKYNRVPVVKY

VKEVQKVHVNKYIHHKGHSNGPKYY*

>TRINITY_DN588_c1_g1_TRINITY_DN588_c1_g1_i4_g.82432

MPETYSWSIGLLNQHGKYLTLEKFGSSTLNVDGSSLRKKQIWTLEQEGDTVYFRSHLKSY

LSADAKGNVTCKESEKHKDAQFTIEPQVNGKWAIKSVHNEYFSGNGDQLKCDAKTKELW

IVQLAMHPQINLKSCFRKRYAHLDVENDRLRVDELIPWGADATITLNFIEGKYALAASN

NKFLAGDGSLKESATEADGCLFSIEFHKNEVAFKGKDGRFLAVVGTGDLQLGKKTAAGK

DEMFEMEDSHPQVSFIGHNDRRVSIKQGVDVTANQRELTDTETFQMEFDKSAGGKVALR

SSKDGKYWEVSKDGGVTATAAEITPQSQFDLEQHGLHIAFKTASGKYLGGKSNGQLELK

PGSEVEESGKYIVELINRPILVLRGEFGFVGMKGTSNLECNRATYDVFQVLPNEEKKGH

YKIRTTSGKYWHTAEDGSIVVDEAKADDFTFILPKHNHLCIKAPNGNFLKGSQNGLFTA

KDSEMSKNAFWEY*

>TRINITY_DN60605_c0_g1_TRINITY_DN60605_c0_g1_i1_g.55574

MATPEDLQAYEAKQSELNEELERRKELGFDFQQILERQKSILSNDETAREGHVVTFEALL

REAVRVLKNYSENGKKNAADLDEFNDQLVHRTGGRVDAILQRMTVEITSECQRRGTRAL

LAEVTGARLCTVEGEILGQERLFDSEGDIVATDIISLDPHTGLVVPDPSTANMLLSDNV

TNVPVPPNFFVHPRTGRVMPVEGNVAYDPLASRLVFTADSTDADAANSAEALIPYIPYP

TNPETGVLVKTSLSTVERRSDMRFGGRMLCGKTGLPVPILGMTIHPETGNAYPIGGCHN

DPVTGLPVAIEIGSMMFDPNTGRPAPIVSVTIDPRNGNVIPLGGTPGESDLGDEVPLLV

GDSFSEPLSGMPLKVTGARLVDDGEERELEPMGGGYQHVLDVAELYHEFRVVEAVRALK

ESVTGPEASGARHEESLLESAQKDLHRARAKVVTQLLRNLHDLMRREERASLLAENGGS

PGMYEFSATGQLLPILVGTSMRDPSGTELEVPVLSIDKNRETDTVIPLGGSMEDPGGDG

LVPIMIGEKAVDPVTEQLSTIVGVKLNQEFAVVEPVTLSSSTQRKRRPPPGSVALLEEE

LAGRRSFWRRQRHRELELTELESKLHHQLIEGEHLMASDVQSQLESIREETVALSDAAH

REVQRRSEASMDHAAVLPTDVVAVLTLFDTAEREKDASHNTAHKRFADTITRFFDKLKV

EETKYNNRMEELQGALNPEAEAAVTERFLVIKERLRDELHDQLQNRSEQLDEEHSGLEY

TRNKAEISALEAKIVLTGGAVLAGDYEVSLPGVYGDDLPLPETNRELVPLLQRLIRLLQ

EGMPVMMNSAGQVVAGGYSIFGGGEGQVTQLAATQPGVSITRGSPAQTAGVAYAPSIQA

GQSAAGSVVQEQAQGKAASLSRRETAVFSTAEILSSVEVGQMGQKYSSETVNIAEIAAA

GTLTEEKRKEITKNLLEKHTLECAQLENELRSNEIKMITDVISEYEQKKEKALAGLQNE

LREKLRRAKSEEEREELLVEYARKMADVQEEIENEKQVKLRDVRRHLRQERMRRKRELY

SKHKAEARAAGISDVIDLDLPDESELERDLLLLAKQQEKLLAELTLAYAEENEREREER

ESGRRAEFDAEMEARVRAMNLSLAPEEIEGALEEVRVLQSSASSRRVNMKEKMKERKER

KKSKRALEELEAQLKNVEPGSAEEADIREALKQRDDADSLRGMDAVLSVLTEVDTEQED

QQRRKVVMKLLGSSQLSEEEQEAAVAKYMEEAEEAKKKFKDLQSHSQAVLAAKLAARRR

MKVERTKEDAMKKELLALSKKQAQLTGDQGAVEVLETAEQSVKKDVASEMGSLVEEQIE

RQAELEINQQKEVAEMTEEMDGVLAVNEKEISSQIEEQKKKLLEEKKQKFQKEMARSQA

NLSEEQAQHLLAQHQQELEILERSLDNEKNRQVSSLNEKIKERKRRKAAAMAQKHEAEM

GKELLKQQSERQRVQDQKLREAQTAALIDKVQGMSNEQAGNTIYRVLQQRHMQERVQME

EQFNNEIAAAKAEARALMSETCQAEREELIAKQEKEMMDLIAKSGSLTSGELAQQKAEL

KLNHKKQLAQFDSMAEKRVAEAEMDAVPSLEIKHAHARLEMRERQLRELAGTMKDLTTE

EELIQSYAEDAEKAAEAAKEYREQSMFDMAEKINKIKSERQQQSEEQRRKMDEEIRRLE

KELEEERNREELRLAEREAERTAKRLQIAEEQDAARRLEMAQRGMTEEQKEKLLKEHEE

NMAKFQENLKNEQARTKEALREKLEARRRKKKELELKKITETGKEDSAAIEQKEREQLS

SLAKEGAQRLETKTPLRPKTPAPARLKARDKSKGITDEDFFEESEPAVTSPAAPVLTAG

LPEGVSEQDWVSMLIGSPIFDSVNEIESMLRDNIGEGGVAGAKGGRPYLDIKDAQWLCQ

GDLVPVDINELSPANFVVYRFGVFVTQMLRNVIQAPEVTLLLASNLPPNNYDSNAFRNS

FFYEHARKILFIRQERMQSVGDFIVVIAHCLAHIKVDDLINDSNPSFLREFYKAIRVCC

QDMFFARSRATSTAQSLVGGAAGPSPLEAAFKRTTTMDERVNVVGELVNIKVSRTVDNH

FSVTRIAERLAKKNAFLTRAKLREYLATGHAPSQRKEEYAMTRLQELRGEKPRESSRPK

SHKMGGKTSLFSPKELLERQIGELNGRIDTLNSELAQVIRTESDLSTAISNMQSNEDVS

DERLEEIKQQLTNTEMQKDNLLKKLDHLDEEVRKKKKELGQKK*

>TRINITY_DN60890_c0_g1_TRINITY_DN60890_c0_g1_i1_g.87043

RPSSFLRKPNSKTCKFCFSVEQVEMSWDSYIDNLVAQSKDGSGSAHVDRACIIGLDGGAP

WTSAGHGSALKLQGQEGVNIARAFKSKDFTSFMSGGIHAEGTKYQFLREEDNKLVLGKK

KGEGALTLQSSKTAIVIAHCPEGCQQGNTNKAVGVIADYLESMNM*

>TRINITY_DN63286_c0_g1_TRINITY_DN63286_c0_g1_i7_g.34449

MIAAAPLRPKFSTKCSWCSFFAAIVNVWYRVVPREKKIFYPNREKSANFEAKEHQLHFVE

NFGLSGAAAIISKTAAAPIERIKLLVQNQDEMLKSGRLETPYKGIIDCTSRTYRAEGFL

SFWRGNLANCIRYFPTQALNFAFKDQIKAVFKPKKTDTYAVKFSKNIASGGAAGAMSLM

FVYSLDYCRTRLANDAKSGSKGGERQFNGIIDVYRKTLASDGIAGLYRGFVISCVGIIV

YRGFYFGLYDTLKPMLLGEDAGLLISFVLGYGVTVSAGLASYPIDTIRRRMMMTSGEAV

KYKGSLDCTMQILRNEGFMSMMKGAGANVLRGMAGAGVLAGFDKFKELYIQLRFKDD*

>TRINITY_DN6419_c0_g1_TRINITY_DN6419_c0_g1_i6_g.97183

MADPAQGCDDLCGEQNKVCVPEGFQGEDVKQLFEDLGQTCKTEEAKTCKTEEAYWAYWAT

DQPCYWFNRQHCYGTTGLPDKINCARGDNPDVKRLCPCDCEGGYFMADPAESCDSKCGK

LGMVCAPEGFKGKDVKQLFEDLGKTCKTEEAYWAYWATDQPCYWFDKQHCYGTTGLPDR

INCSRGDNPDVQRLCPCTCQ*

>TRINITY_DN648_c1_g1_TRINITY_DN648_c1_g1_i10_g.36676

MKSLFIGLLILLVLNSCFGKKGGGGGKKCKAKALCAVVEQLKSEVDGLKKWVEEHDHEEP

VHKAESCKDLYDQGEREDKAYELHVGSKTVSVYCHMSAIVNCGSGGFTLVMKTDGTKPT

FKYDSVLWTNDESYNLAAGATGLDRRETKLPTYSSTSFNKVCIGMNDGGRNRFISITVS

AHSLHDLIAPGEYHKTSLGRDTWKSLLASPSLQRNCNMEGFNVNQVKIFKARIGIVSNN

ENNCNSCDSFVAIGSSGAQTTGNRAAWGPDNGNRQTATIGYVLVQ*

>TRINITY_DN6570_c0_g1_TRINITY_DN6570_c0_g1_i2_g.49053

MFKFLGFGRGARSSDHLKDKQGKDLFEFSKAIEHGFPPKSSAIAHDPALRLLAIGTSTGV

LKIYGRPGVELSARHSKETVIQELHFLPEQGRVISVCDDGEQNTIHLWEVNKRNGKSVL

EEVKTCTLEGRLKKISVCRLSMSTNRLYLGTEGGNIYLLDINSFELQEYVIYQDVVMQS

VSDENKSNAGSVEAIQEHPSDSNKILIGYRKGLTVLWEHGSCSVRQTFLVSQELQGVAW

YPDGDKFVSAHADGSLNVWSVGEEEMNRDSNTPFGPFPCKAITKIELSNNLLFFAGGMP

RASYGDKHCISVMKDSTIQVVFDFTSHVLDFFTIGEEDSHFLAVLCEQEFVLIDLSGKD

KGYPTFVKPYLACLHSSPITSSHHCHDCPAELWDKITAAGQDQMTDEHSSKDWPITGGK

TICEEADTRNLLVTGHEDGSVNFWDVSHEGMALLYAVQTSKFFVGDHEAHDSEPQEGEE

DAWPPFKKVGKFDPCSDDPRYAVTKVSLCTKTNVLTVAGNGGQVLIFDISDESSEVELE

ITEIDFVADKENFQWKGHGPLLPKEGKISSPKGFKPRMGLQLTPAAPITALAVHSDWGL

VAVGTVHGVIMFDYLNKKTITTKWTVVEGESATGEHLSRKKSLKQSIRNSIRRLRRSRK

GSSPKKRGEGGEGEEAAAQATSPVSRLVNENRVEEDVMSMVRCLYFVDTYLRDAATRSA

SLWAGTNSGHIYVFYINVPDDRSAGEVSGELGKEIKLKHKAPVVSIFVVDKDGVPLAQT

CADDGEKGPDLSGQHSLVICSEEQFKTFTLPHLKPRTKEKLTAIDGSRVRKIGLINVTS

KNDEPGVVYHCLACLSNQGDLSVYSIPRLKLQLKASCLKKEDVSGISSLVFTSNGQGFY

LSSNSEMQRFSLTISEPLERDCILELAEGMRPAEPEPALAAEVELEVEAEKKSRSSSSS

SSSSDSKKEEKKGEEEENKGEEEEEKKEEEEEKEAPKEKEEDEAAKQDG

>TRINITY_DN6589_c0_g1_TRINITY_DN6589_c0_g1_i1_g.49149

AERARALQDGDPNVEIPDCKQNGDYDEVQCRGSWSFCVNRAGVEIPGTRKKSGEMKPYCP

AFDSGMTKCQKEVQWRLMAGEQFVPVCKPDGSFENVQCSAGECWCVDKYGNEITGTRSN

ETVQCKAPPRACDKQLQNVLKDGFRQGYLPRCNTNRTFDRVQCDHGVCFCVDRNGIHKQ

GTGVNVLVRGMPLCDEPDKPFTECQRRHFEAVTAPQLTYLPLCQPDGSYSEVQCRNLGE

KPVECWCAHKNNGTEILGTRTTGVLKCPNAAHTPCMQRFKKHYGPRLAPWDHVPVCNPD

GSFVSVQCDAFRGSCWCVDKNGEPVWGTARRGIPDCRRVVPSTLCQRHRSRIMGFSGRV

PPGAFVPQCTEDGRYRDVQCHGSTGYCWCVDVDGIEIEGTRQWGEPECTKPAANRLVVD

LAFLFDASSQINGPSFARQFTYAKRVLDALEISPAYAHVGAVAFGSTSEVVFTFNDPLN

GPNLTSAVVKGLIDGITHDGGLSEIVDGLLTVKRDLFSSKGGQRPNARKVLVVFVGSPE

EKAETSLSSAARQLMNGTNVEIFAVGVGSTFVLPELRNVTTSPDNVFVDANIHQLVPAV

LNAARQKPTLPPVVETQPNKCELEVEKALALAPSAGRFVPRCTKDGFEEVQCSEWTGEC

WCVDNEGVEVSGSRSKEFVSCPGQVRQRTDCQREYQEAESHKFLVGRFMTRCTPRGEYE

PVQCLGSQCFCVNKNGDEIAGTNVNLPARPDCSFKGKPKTVCQAESERLSQNAMPGAFV

PICEADGSYRSVQCQGSVCYCVDRRGMELPGTKTPRSDGPPTCSRPGSDLSRCQRMYQE

NWRNPVPGRYVPQCNPDGSFMSLQCHGAFCFPVDDFGREVRGRRFLQTLVSPYLSDEDT

PATPCQNELAFYQSAPPDVNTTEPRCTSEGYYFQIQCDRTSGECWCID

>TRINITY_DN66249_c0_g1_TRINITY_DN66249_c0_g1_i2_g.90563

MGFRVLTVVFLAFAVSRSQGQGITRVVDESLKGEQGPKGDEGPTGPPGIRGQKGVQGSVG

DSGSDGLPGPRGPTGPPGPPGEPGDPGNPTVIRIGIPGTTGPRGPKGQPGPPGAAGQPG

EAGPPGVIGPPGANGAPGEPGESGPPGKDGLNGTKGMMGMRGQPGPPGVRGPDGVAGQK

GSRGEKGDPGFRGLRGPRGNRGATGARGPSGVDGKNGAEGGRGPAGPPGDPGPDGVTGP

LGSQGAPGDDGRTGAPGPLGLPGNPGPVGAQGQGGSVGEPGVAGSPGAQGAPGRQGDAG

DRGESGEPGVDGRNGDPGAKGEKGVAGQPGPQGRPGENGIPGPNGLDGEAGEPGRKGER

GDKGRQGVRGARGTVGPKGEAGSPGRQGPPGQVGRNGNTGPDGGPGPQGPRGSNGLKGS

MGPPGTPGEPGDRGSDGQPGADGLKGERGDPGADGEEGRPGPRGLPGTPGESGVEGAQG

EKGAAGRNGQDGAPGPPGAMGATGAVGRSGLKGAAGSKGKQGATGPVGSRGAQGSRGAA

GDQGNSGEPGQDGANGEKGMMGLPGNAGGPGLQGDTGPQGPPGPDGKRGPPGERGQDGT

PGATGQRGERGERGEPGETGAAGESGPNGENGGDGAPGEPGVAGPPGPQGNAGESGSPG

RPGSAGLTGPKGEEGDVGAPGPRGEAGNDGSRGYAGKPGAPGAAGPPGARGSPGLSGQP

GHNGQPGIVGPTGEPGPAGPSGADGQVGAAGGIGKAGSQGARGEMGGPGQKGEQGPAGD

VGPTGEKGLPGNSGAAGSIGTAGAVGPTGSPGPPGAIGLTGPQGAPGRDGQRGTDGEKG

DPGAPGTPGLRGPPGQAGLNGGNGAKGRGGQPGKQGPPGPTGSPGLPGATGASGRPGGT

GPSGPAGAKGPRGATGDAGADGSPGSAGESGSPGPKGSKGNTGLPGVPGANGKPGISGQ

NGARGQKGSIGVPGQAGGPGNQGPRGLPGSPGPEGDRGARGDPGEDGDPGGEGEPGLPG

NSGAEGDRGPTGAQGARGDKGTPGNAGAPGPGGSRGRPGPPGDPGESGIVGGRGPKGPP

GPPGPNGVRGVQGVQGASGTQGSKGREGPPGYPGRPGEVGPSGPPGPRGPDGFAAPERT

VKSGTPRRRRSADTLEEDLPKKPLGEEYPSVEDRMTLEDNLAELAIEMFLFEHRNGDKY

FPAKTCRDLQLCRPDKAWKSGLYWIDPNMGSPEDAIQVYCDFTRNATCVQPKKTQIEKK

RWTSGDGRYLWFGEDIMSGSKFEYAADEIQLSLLQLLSTRASQNMTFHCKNAVAWYDKT

ARNHKKALKLLGANEFEFDIARYKDLFKVQLDECKTADNSKWGKTVLEVSTRKSSRLPV

VDFATYDMGGEFGMELGPVCFS*

>TRINITY_DN68176_c0_g1_TRINITY_DN68176_c0_g1_i1_g.117593

GSSVQSIDYSFGVSWGESLGGSVSQTLGQSVTGSLSVSGSNSMSNSGYGYRIMEGHHRHR

GHKGHYGHQGHHYGHHGKYYDEEMEDPSWKHYGQHGHYGHHGGKKRVVATRGEARAAGS

>TRINITY_DN6821_c4_g1_TRINITY_DN6821_c4_g1_i4_g.56932

MKVWCLALVLLASYAYAFPVEDELSDEEFLQDEENQEDYRHDKVIKVPYKVPVHIDRVVK

VPVVKKVPVRVPVPHHVPVPVHHTRIVKVPVVRKVPFPVRVPVHVPVPVVHTKYIKVPV

YNHVKVPVYQTVYHTKHVPVIK*

>TRINITY_DN7147_c0_g1_TRINITY_DN7147_c0_g1_i4_g.116117

MSGLRKAKKYDWKDSNLALFGSDLEKNVKKAAAGTEKAWQNAGKEVGLQIWRIVKFKVTD

WPRQDYGKFYNGDSYILLNTYKEEDEIKYDVHFWIGPESTQDEYGTAAYKTVELDTFLD

DKPVQHREVANHESALFKTYFETITLMNGGADSGFRRVEPKSYTPRLLRFQGTTMKNIK

VKEMEYVRENITPEDVFIVDMGLDVYQINGTKCDKDEKFKAVQYVQQLKSERGGKAKIH

STDYDGSTLRTPLDKLPSGARDEEEPESNAKPVLLKLSDASGHLETEEIPRIAKSSLKS

DDVFIYDTGKHCFVWTGRHASVDERRKALQHAHNHLIRTDHPFVPVTCCLEGKEPKAFH

DAF*

>TRINITY_DN7187_c0_g1_TRINITY_DN7187_c0_g1_i4_g.116238

MARLWPVSVLGVLLFIHAAIGQDLPDIPGPPGAKGPPGVPGDQGEQGLPGDPGPPGFAGD

NGKPGAPGPVGEQGEQGLKGPPGGSGGVGGLKGPSPGEIQGEKGEQGVDGPPGPPGSVG

PRGPPGSRGSQGQAGPSGLPGQRGPRGRPGAPGQPGRNGIPGDKGDTGDAGEAGPPGPP

GDQGEPGFPGETGQKGGRGAGGAKGYKGEAGQPGERGAPGRAGNPGKDGENGESGLPGA

KGKTGLPGPNGMSGPEGPPGARGAAGQTGPPGPQGPQGVAGLKGAQGAAGSRGVPGARG

EKGPRGGTGPKGLQGLRGKNGRNGEQGLKGDGGDTGPGGQQGLTGAMGVSGVPGNPGPP

GLDGDRGQRGADGDKGVQGFPGRQGPPGSAGPRGVQGRVGRIGAKGKAGSQGPAGAPGA

RGPTGSRGDPGSDGVPGDRGEAGSNGRPGFDGQQGDKGSAGRPGSPGSAGPRGAAGNPG

VQGREGKVGIPGDRGSDGATGTPGKPGPPGPPGPAGFAGTKGATGEPGATGEPGTQGPQ

GAKGEMGQPGSRGPTGEPGVTGRNGERGETGAPGSPGPQGPRGAQGAPGQPGQAGEMGS

PGERGSDGTPGTRGERGLPGERGAPGVDGSPGEPGMPGLPGADGSPGERGVAGAPGAPG

VAGAAGAPGSPGRTGSPGAKGDQGSTGRPGSAGPPGKNGEPGQDGLRGNPGPPGSPGVK

GEDGTDGANGADGNPGDRGARGVAGPAGTPGRPGSPGSPGPAGRPGAVGEPGPKGPKGE

RGDAGSPGLSNIEGQKGAKGIKGQPGNPGNQGTPGQAGVAGKPGPSGPPGPPGPPGPSG

LPGPNGLKGVQGDPGVNGQDGSPGNPGPNGKDGEPGSPGANGRAGPIGAKGAPGPKGEA

GAPGATGQMGARGDAGPQGPPGDTGLSGRDGLAGDDGATGPMGPPGPSGDDGDPGIPGA

DGTPGQNGRNGRAGQAGEVGAPGAPGRTGQSGAPGLPGADGAPGPKGQAGSKGSRGKDG

TTGITGKRGQAGPPGPKGQKGYRGAPGAKGDKGFTGPTGNPGAAGDQGPSGTPGSDGIR

GPPGIQGEPGDPGTPGGEGGDGLPGDIGPPGVRGDPGDVGPRGVDGSKGPTGPSGPPGP

PGYPGISPIVNYLAAGGEKSGGGGGGGASEEPDEPPGLYRTRETSPGQSEILEQQAKFQ

ELSDKARELLRPAGTKDNPAKTCADLHLDYPKLPNDWYWIDPNEGSKLDAIKVYCDFNK

NFSCVRPKNAKMSDMTLDPKYGENYKWLSEAFTDGEQIEYDGDSTQVTFLRVFSRRAYQ

NVTYHCRNSEAWQQKQSIKLMGDNDMEYHAGSASKLRPTVVSNGCKSKDGNWHKTVIEI

DTRQTHRLPINDVAPFDIGKADQEFKLEIGPVCFA*

>TRINITY_DN8038_c0_g1_TRINITY_DN8038_c0_g1_i6_g.40108

MIRSALTFLLCFQVIWSQQDVCDQPMIKTAQDGIPDSALASTSNINDHHGPKEVRFIGGD

AWCPDTKNAQPPHILTIDLGSVRKVGKIATKGRQSKKPMYVKSYIVRYSKLGVVYTSVM

DPLNAEMEKIFQGNADRDTSVYNSLHNSQGLPLEARFIQIIPLEFERLACIRLELYECA

AAPVTTTQPPVPTTTAAPPPPVTTEAPSDCPPGFQLDTDNVTCVDIDECSLDVKPCNQL

CSNTNGSFVCSCKPGYRLGSDQRTCQNIDECSDKNLNKCTQNCHDNEGSYTCSCRSGFK

LDSDGFTCNDIDECDLGTDSCDASTTTCVNTVGSYVCRCKSGYKKSFSQFACVDIDECS

EGLSECHIHSSYCHNLIGDYECLCRHGYERDTKFACKDIDECAQPDKGGCSDGCNNLVG

GYECTCPSGFELDGSGKKCVDKDECKDNNGGCQHTCVNTHGSFHCTCRPGYKLSGPFQC

VDINECDEGSDQCDANSTTCKNTVPSYECPCKDGYKPIANERYKCELKTCSALIETTGT

SVSPAKCLTNDGNKVGDKCTFSCQAGYELPNPGADTLTCLSTGFWDGALISCKKKVCPA

LSAIAHGSVQPSRCTTSGHEFGESCFYTCDNNYVLQGNNSKECQADGTWDSQKDPTCVK

FEPAPHITCPTNVHTQLLSGASEADVTSLWKDPTSNYQDSILLFPEKYRQNLVFPAGRT

TVTFEASNNIGQKATCSIDVVVEDKEAPKWDACPNDLYETTTQSTATVTWTEPTASDNV

KVASQESTNKPGDSFQIGQVTVRYTAKDPSKNKGECSFEVNVKKAECPDGVPPDNGALT

SCSNFGGSKFCSITCNANKKVFFTVSSVYCDVNTLKWTAIPDCVDYVALPADGCPTGMV

KQTASGFWPAPENICVKCPRGTFYDAKSCKKCAVGFISSAEGSSKCSECPDGYSTMEEG

SKTCTALCKPGSYSPSGFALSELGQQCVHCMKGYYQSQAGAKSCDKCPDGHTTLKTGAD

SANECGVAPKITSFGPNPVKAKENQATKFECRASGTPVPNFQIKKIVPAPDGFGGPVTI

EDILNDDGSLAGIRLVNSKVTEHDKGRYECKVQNAFGTVYAYLNVEVELDFGTGRRRRR

*

>TRINITY_DN92373_c0_g1_TRINITY_DN92373_c0_g1_i1_g.13849

NRCGRLICRVQFGHCTSPIMRLSFVCAFLVLYAAQVKAAEPCNPDVCKLPDCFCSGNDIP

KNLSASSIPQIVLLTFNSAVNSLSYSYAQEILTAGITNPNGCGITGTFFVSHEYTDYRD

VMVVRNERNEIAVNTVSASRYPAYWWKTATLAQWKAEIADMKEILRVWGQVEADSVVGF

RAPEIQVGGNAEFGALHELGFLYESSMPTQNSLNHPFWPYTLDYSSTQDCEIPPCPTDS

FPGLWEVPIVDYEDGSPFCNFLDSCKPPPENVDDVVNFLYTNFERHYNSSNRAPFFVST

DPAWFAEHPGYSETGVVNFLKKVAAKGDVWIVTISQAIEWIKNPTTLDDIKDFEPWKCD

SAPPPPPCSPQAVRTCTYDNGTHVMRTCTSPCPPHYPWTGNPHGL*

1x Clean Only

>TRINITY_DN10018_c0_g1_TRINITY_DN10018_c0_g1_i2_g.40557

MALTRELLLLLALAISASVTRGQEECKTVYDVALLLDGSGSIGRSDFRRLRTFAADTVRT

FNVSEQGSHVAVVEYSTEPNLVVGFNTFSGAELNNENVIARIENMAHSKGFTYIDRAIE

FASAEVFQVDKGMREEVEKMAIIITDGAQTVHDGLETDPLKDVADRLRNRGVKIVSVGV

GAVDPIELLDMAGGDGDLVFRATSFEDLEKTLSDIIKTACPVDGQWSPWSSWTECSASC

AGGLQRRNRTCNNPPPSGGGANCTGPAEETQACNEDPCPIDGNWGEWSPWQDCSADCGG

GVRTRFRVCDDPPPSNGGARCVGISEDIENCNEDPCPIDGNWSPWKPWEPCSVTCGDGQ

QSRSRTCDNPG

>TRINITY_DN1036_c0_g2_TRINITY_DN1036_c0_g2_i1_g.104529

MSELADKLARRQALNEDEDMPRRQVQVFNPYTEFKEFSRQQIKQFEKKFKSFDVDNDSFL

DLMDMKRMMENLGAPQTHIGLKQMIAQIDEDHDGKVSYREFLLIFRKAAAGELEEGSGL

SELARLVEVNVDEVGVGGAAKFFEAKVKQQSDSNKFEREIREEQEQRKREAEEAKQRKQ

AFKQKAALFGTH*

>TRINITY_DN10582_c0_g1_TRINITY_DN10582_c0_g1_i1_g.100073

MKMHNILVAVLFVVSAASLCSRTVAEKCQIKLPQDVPKDTDCYQQRQSDLEKMQATFRLK

TSQLVPPFPMLDMTQSELFAVVKSDPFASSYTFPFLKMSKGNQEIFDGYHNKTKDLPIT

SLGDYEEIREFFRETPQKVLGLGKQVELPSEHEDFQIDFTEWIGDDMFAQQRLAGINPN

GLERVTVHKPGREAIGIDWKKLKNEINPAFDVNRALKEATDGKLSLRKALRLGYLYAFR

IPLADDLESVPDITDDDPRRKRWDWQSPIALFYTDKRAAAGIRPLAIQMCHTPDCSVFT

PNDGDDWMFAKLNVQAADIGYSQIADHLVNIHILMEPVCVAVKRQISVHHPLHEILKFH

CREIIVPNTFGIPTLVGEGEFTHKLFPFGHLGASKIIRKLYPLLTWDITDFRKSLKAIE

TLSSSESLASLLSFPI*

>TRINITY_DN10_c0_g1_TRINITY_DN10_c0_g1_i4_g.2797

MASQRLMVSGFPEGTTEAELMMYFQSRKKSGGGDIAKIKMEEGRRAVITFEEEGVAQRVC

SRKFQALRDAKLQVSLNFLQAQNVAERGHSMRDSNQWEPSTPEDPRRSIDARRDSSTAE

EEANTQVTQQGASCRVEVTGLSKITSADCLCLYFENRRSSGGPVDDVEINQKCGTAIVT

FESAEVARRVAERTDHMLHNRPITVSLLPKEEPEFEELKNEDPRPAETERCLSFLISNF

SSATTEGKLRYYFENAKRSGGREIQELKFYPDEGVAELSFAEVADYERLVGQEHRLEGQ

TLSIEIQEPEKGLPLDTRNLYVEGLNPQTYRDCLIYYLEKFSVGVEVESIQFGPAGRAL

VTFKAPPDFDYMIEKVNSFNKGLEGFHPRARRSPVCSSIKVTGLSTQTTEERLILHFES

RRNSGGDVHHVDYEEGSDSAIVYFKDVQTVERVLKKQDHSLHSKALSLELYHPILEEGP

QNRQRSGRTRQTKPQKVLAVDRDIVSFIEEFHEDELGELLESLEVSMVPDKSADSVVIS

LSSVGRGNHVQSSWAERAEAITKFLNAFTKTSIDLGGDLAVEVQKRMHETELLKAENIP

EQVHITFSESGGSVQFIGRESYVSEAIRAFHIVARSVEDDLKLKRSLTQSEDKDIPQDK

LQLLEMSGYCLELEKKRKHLKIEVGAANGHIKFSGPEVEIIEAKTDIFKFLMQTKTLVL

EMSERCLRVLFSPQGRSYTQKSFQEGNIVATVSPGQRGMKNEAVILGLDDGNARQAESL

LQTLYKEFNTPLKDGQLPLTNGQKWKELVSQVQFQSLVSVNIESNMLWVSGVSSEASRS

FQQLRDFLVHNTVLKETISMPKGCSRFLVTAWRPEVDQITRKNSTTWSPASDREEDGSG

GIIISGNAENLTKCVEEIQNLASKIKCDNISVDKPGMGKLFSKVSGGHLLRGVEDKNRC

TIERIMDVDEPTETPLLESAYGGTDSSCTCTYVTRHGKKISVYKDDLTKHHVDAIVNAA

NDRLQHVGGLAAAVVKEGGKEIQEECEDHIRRRGGSLLDGQVYVSGPGKLPCKQIIHAV

GPKWNAKATEGEKTRQENMLAYAITNCLKKASSLSSIAIPAVSSGVYGFPLGLCASVII

DAVADFFDENPTCRLSEVHLTNNDDRTVSTFTDKMRKKFGKEESFHEHGAISAETISAT

NAALPIARRSSATNPKQPLTTAEGVKISVQVGDLTNVKADVLVGSCGSTLQLNNNPCAR

ALSQAAGPGLQQECNTKGTVKEGGIAQAGPHGLQQCKAVYFAVCSSWNGGKGEKVLMDL

FRKCLTEAHNSNMASIAFSSIGTGVLGFPPATVAKVYFDQAIAFSAKHPRTRLKEIKFV

PFDKDINTVSAFTGELSKRASRGLSQTNNTKGGAQRRWGPNPVFSRVKERASDHLQVNV

GPICFQVQAGDITKETTDAIVVVSNPDLDLKLGGGAGAAILRDGGTFIQMECAAMGQQP

PGAVVRTSAGNLNAKFIFHIVPSQKATMKETIVKCLQLAETSNIGSISFPAVGTGNLGM

EPKDCAELLLTSVETFSQRNPKSLQLVRVVIFQPDMVDAFRSVMKIKSGEESPSEHWVV

RTVKKVASYMPFGSDQKEASQAEMLKSVPADIKMSLNVFAGTRLDVDRAIKEIRELMDE

HCKQKFIEKDAIMLLTEDHERRIRTAALRHGTKVEIEKPIGRIVIRGNSDDVLEVTGEI

HEILDEIVEDQRKRYQEDLLIKTVEWEYKDGAKFEKYPKDVNLKIETAHTEGKKKVAFV

FDRQQCEIDFGKMEERCPAYRSVVDVRRRDVKDLAVPAHWAPQPTDSNGKEKEVHLVKL

NSNMREYQSVEQHFQSSMQGTSTIISIDRVQNPGLNVIYETKKAKMDEGKGSNEMKLFH

GTAGKNLDKINAYGFNRSYAGAHAVMYGSGVYFAVQASYSARPTYSPPDGRGLRYMYLA

KVLVGEYAVGKQGLIVPPSKNDPNNPTESYDTAVDQDPNPNIIVTFYDWQCYPEYLITF

K*

>TRINITY_DN111_c0_g1_TRINITY_DN111_c0_g1_i9_g.76699

LVPPANVVGAICPGDCSGKGECKDGKCECKAGLGAEDCTIDLNKPPEVTSIQGDGLCNLD

NRKCQVIRLEGSQFLESDKLTCHFKPFKFQDCQETQDGEEVQTKADLSSSVEVACPYPE

ADQDALPWRYRVSVSNNGVDKSEEFKTVVYHSMCHACKDSGECSDNVHKRKACVIDGIC

YGRQEFKQGDVCLRCHPLMNRNKWTKNKHDEPPKFNMQETYSVCVNQSFKLDLRATDPE

GTE

>TRINITY_DN1204_c0_g1_TRINITY_DN1204_c0_g1_i2_g.86265

MSRLALLIILFVGAVCVCAKTHEHAEEEENGDSGSGSSGEMTEEDIDKLTDKEDLEKLHI

DPDDCYDRKDEDCEDRAEEGKCLKDLDNMVKECPWSCRFCARDDGDTKKCIDKGDSCHK

FAQKNDCLRLPQYMMQNCKKSCELCGPENEYQDEDTRCPDWAKQGYCSTNDDIRDKCRY

SCKKYRSARPAPAPYPHPVTTLYPYQWSSTQYPSPYPYPSPHPSPYPYPYPYPSPVPYP

QPQPNPHPSPVPSPVPTPVPSPVPSPVPSPVPSPVPSPVPSPLPSPVPSPVPSPVPSPL

PSPVPSPVPSPVPSPLPSPVPSPVPSPVPSPLPSPIPSPVPSPVPSPVPSPGPMPSDVS

DKTLKHQKKHKDKKHDRAINKAEKKIE*

>TRINITY_DN1342_c0_g1_TRINITY_DN1342_c0_g1_i3_g.114260

VGTKVATVEATDKDSAAVTRLEYALASSHLNETFEVDAKSGVVTLKSAAGIRAGVQQIKI

SVSDGKFSSFSFAKINVQPLPSGRVKFRQPSYTTHVLEGPSISEDILAVQNVGYSLGET

LSYSIVNPSDLFVISPSTGVISTVQGGEFDREQIDRYVVVVQARGSGDVPSVAQVPVHV

AVQDVNDNNPVFGDSSYFFVVQKGGRLGAWVGQVSATDADIGSNGEVRYVLKSGGENRF

DVQFDSGLVTVKSSLNDVTDSKVFKLVVEARDNGRPRLRTEVEVQLKVVDKETPIFGRV

SYHKELREDSRIGTVVAKVQARSPGGADIFYAITQGNPFDQFAIDLRTGTVTIVAPLDY

ESTPTYRLTVRATDAKTSSHGEVDVRVTVTDVNDFSPVFNESLYLATISEAVAVGTSVL

VVPAIDKDSGVNRQITYSLQKESNFFSIDANTSVISVAKELDYETRIVYDLVVVATDGG

TPSMTGEARVRIVLQDANDNPPRFNRDTYHTAILGSAGPGFFVTRVIATDADESDAARL

RYSITSGDGRQYFHIDPTSGVITLSKVFGIEPGKVYDLDVAVTDNSTTARAQVRVVIGD

TNQHSPTFSQDVYQVEFHENYAPDTFVTMVAATDKDSGNFSRISYSIDSLEAARKFRID

AETGMIYSRISLDRELPSQASTHVPVRATDGGGRFGFCAVEVTLRDDNDNQPEFEVDQY

EARIPRTTGVGSHVLLASARDADAGTNGALTYTIMGHQTPPLFGIEADTGMIKVMRSPA

VKTYKFYVMARDSGSPFLYSTAPVTITVLDRDAAAVRFSRVEYQVDADEDVGTPSLLTT

VRASVLGVQNPGPIRYRIIPGPLPSSRGELFSVNSAGQIRTAGALDHEVLKRYVLIVEA

NATSFNQVAWATVVVNVKDVNDNKPRFVSDPYTLDVPENIAVGSSVLRVFAEDADEGTN

AELSYDFSSPSQHFAINGKTGWITTTAALDRETAGSVELSVRATDASTSPLTGRTVVRV

NILDVNDCPPRFSRAQFAASVKEDALIGQEVTTVTATDADQKPDMYFFIMSGDPLGKFG

MDRKTGKVFVKGALDRETVASYTLNVSVSDGLFTGFTDLKIEVQDVNDNPPVCARSMEI

KHISEDSPNGTRVLTVEVSDSDDGENSRLTYTVFGEGVGSFVFDQSTGDLKTASGLDRE

TKPYFNFMVSAVDKGGLKCFSNITIHIDDVNDNTPTFTQAQYSVSEFEDAHVGKVLLQV

KAEDADVGVNRKLSYSLLDDAQGTFNIETETGIVSLEKPLNREMRASYTLTVKAQDAGT

SPLWSTATVKVLVLNVNDVPPEFTQSVYAANVSENAGLGTVVARVRAISKEAGPEEISY

ALLPGRDSNLFKVDNKSGEVTLHGALDFETGTRYSLTVQASDLGPPVLTATATVNVEVT

DANDNKPVFSQLAYSAKVDENSPVGKFVVQVFASDKDSGANKLIRYSIVGGNAAGKFQI

DAGSGTIRVAAQIDRETTPSFVLTARAQDQGSTPLAAEVTVTVDVNDQNDNPPEFQRRS

FFVSIKESSPTGTDVIRLQPDDKDSPENGEPFSFLLLSGGDSKFKLYQNGLIKTDGMLD

SRYGDYVLKIRVQDNGAPAQFTVVEVRVRAEGTPTHPPKVEPLNIYLNLYNSQFNGGVV

GRVKAEDQDKDILVFSLVAPSGTPFEITRGGTVRTVASVFSGIYHLNVSVSDGVYREFV

PVKIDVSDITDDMLERSITLRLASMAPGTFVEKHFTKYRHFLGDLMGVPAGSVRIWSLQ

SSNTSLDVVFAVRKSSGTYHLASAVARKLNATRGRFERRVGVKVAYIGVSQCPRMQCAT

QYECRVIYRPENEQIRIMSDRRTFISYEHSRGHACVCRDKGGCSKLGKCASSPCPSGYK

CQDLPTGYVCQCVDASECPKEKTGCVDESCIKGTTAASFAGGSYLRYRVKIFRQPSRSL

SMAFKTWKSTGTLVYAAGDYDYSILEIVKGSLQLRFDFGSGAGVVSLDWYRINDGKWHH

VRVEREGNHATVIVDHGRHRASGQSPGAMRILNLDDDSIYFGAKVGSSVLRRDASNVRI

DNGFHGCMQNLNLNGQDLPLTGSSGGTTADGHGVQPGCQTSGACKLNPCPLDRMCVETF

VDHQCECLPGHSGAECKAFITCSASPCRNGGTCLPRVAGYSCACPPLFKGLQCHVSHAC

ASSPCQNGGTCEPSSAGRDGFTCRCPDGFNGRRCEIGVSCKEEPCKYGGSCNDDGTCSC

SEGFKGRDCGQDVDECLGEPCKNGGVCKNTFGSFKCNCSASSYGGQFCDAVVPDIAAAT

GDWPLGKGEIIGIGVFLFVILLIVLLAVILLRRRAKRRKSKALKVSPPVVGPNVDSPDP

PTPPPRQLGGYEDEGGSIPPMYDSEDSWRRHCAAKEFGSTKLTKASDANLSGYSWDFTD

LRKDSFPMQQRQSASLQEGRPEVPQRPRNYRFSESEDADTVHVPHVPKKPALYVNPRGK

GGSRLSMDGSEISEYTDIEHTDVFRGRFPRPPREAYPESLDQHPVGSYAPTMMTGRESE

LDSVADFTEDDLERVYLGNRLETCDDSPENTYLHSETFSDEDDDGYAPVPQDDVEFHKT

LQREIKTMMDELEDLKMESEL*

>TRINITY_DN16377_c0_g1_TRINITY_DN16377_c0_g1_i2_g.13578

MDFPRGSIVVVMILACWSLGIARAKQETLGRGFYLPERNIIEDSFIGGSRIFEKDLPPEC

LVETNPKDAGKTMSDVTYYKDTAEFYKQVGTSLGLSANVATYFTLGGALKYVAGSDSEH

SVSGTSLTVKSIKSSTALSKSCINEKELSKKLVDALDALPKTINMPQIDISWDKYNTFL

NTYGSHMPVAVDYGAQLIQWEFSESKKLYSNKEFLTRACLDLLNSTIKVGGGVDACAKI

KWKDFEKVANVYSKNKLTISGGSVETQTKLREKEGRTEEAITQLTKEGKGEFPAAVSYR

WKPLYEVLLQRFPDGDRNIKVKNLRMYYEGMKNFGCQLIQQGETILRQFVLNEEHGDPT

AFECRVPGEGCHDDNDCHYSFGRGCYCYGRTCIEKVTKTIHGESREERAIREDMKRGLN

EGPNKTCHWKGSCKCEVERFWPKGEVVWSYGSIQKKGKVGAAHKKHEETSGDRDEADEQ

EDEPEEWSA*

>TRINITY_DN1647_c0_g1_TRINITY_DN1647_c0_g1_i1_g.121366

MPPTPSPSLKLAHPKKHRRGLENYGTVPRWLDALGIWVPAKQEIKSYESFSTNKVLNQRS

SDMFLDPFPYLPRCNHACTLSALYRQHERLLAADEQRRKQRCMKIIDRLTQLREVWDSW

KNKSESVGTEHLTRLDAFRKSKETYIEPSEVIRKKRELRQQQEKEFREKQRKKLLELRE

QNRVPKIIVTNYDEEVAALQTEAAEQQDRDAVCSTSSESLGEENVHQSEERDSILDEGH

KTECDMETEPRDVTPPDYQCAPIVEDANKSEAISSRSCFDLEVAQFCDNTDGLASDSTE

TVDVLEGHTNSIRTEYIARSLAQRSEETKFTSRGSVTANDQTSLTEYEANALAPAAAAV

DRSTEKAGGSQASYSNDGHADRGLESEAFHPNLLSAPSLSSLSQHGHDALDGIATADET

AHLMSTNVPVPLGVADRSLSDGSLRASSSQDRYCKPRQARLHNTPQGKNLGAWKPKTND

NKQFLQVDLGSLTTVMQVATQGCPSANETSKRDKCWVKSYSLAFSKDGKKWEEYQERSK

VKEFRGNQDNDTVVVNSLDAPVQAQFVRFLPRSWKNSIAMRVEVLGEFPDVASQVTGSI

AGDQDLPEEDSFIEVQEEELNNEVYREEARSPVDVQERWEESLSDSINDTPGVQLCTVA

KVKRSLGPPLARLAVQGSKSLTVKPKLRKPKSEKREKKKKKKRKSKTVKLPSLVPTAEA

PEEDDEEGRSSTEEEQDEAPQEEPLFVIPPLPGLPQNTETGPRPQRGRTLSMFGSVPTT

TDDPKPRRRRVTADNSIRMELLRQQLAEERRQKLRSAMDKTKKRDLGTRTPSPDSGGSS

PFVDDFLAKNCIFSDGQRQYYQRIFNYFDEDQDGHLFPEQVLGALAFVNSNLLSDSHLN

YIYRVLDLCDCSLDSGADIKLFSVVAALSQRVAALDEFAKILMAQLDFKELDYKLQKAK

MLFTCYVDEVTKTIPLELLMLDLMAGGLASDSRNNIMKTLGRTSSLDFLDFLTYIPLFI

HIHDHVLSDPLGGVA*

>TRINITY_DN16795_c0_g1_TRINITY_DN16795_c0_g1_i3_g.119604

MHPIASGTITVLCIFVGLTLCADDFDPRQDLVVADCDMAPNRQPPEGLAPDVKGTIRILQ

SAAGGKTHFVVDLKNVSSPHTLHGFHIHEFGDIYSQGCQSTGSHYNPFGYFHGGPQDKI

RHVGDLGNLETDADGNIKAEFDDTQVSLLGPMAVNGRSFVIHAKEDDLGRGTGPAREES

LKTGNAGARLGCCTIYLVSPDNSNNDEMS*

>TRINITY_DN168_c0_g1_TRINITY_DN168_c0_g1_i12_g.76555

MRVLLGVARFKKELVSSVWFVAREGETRLSKMSTARGRAGGELKQRRNSAPSGSRARSVR

KPDDILRDVRGLKLRQRVSLVLNDKGLRDELEDIVDNFVQNGPKSNADGFRTYQDFLIP

SSTFYSPGLASGIHPISDIRGSESLNYSKQERLLRCKLASVYRLAELFNWTVGIYGHIT

ARATTGEDHFLINPFGLLYSEVTASSLVKVDKDGNIIDGGSTSLGVNKAGLVIHSVVHC

ARKNVKCVIHLHQHAVTAVSMMHQGLMPLSIEALSLGEISYHDFQGITVDEAEKESLAN

DFKENSKVMFLRNHGLVVVGDTIEEAFNTAYNAVRACEYQVRAMSAGVDNLIKCNDQSQ

EQVAKVVEEGVDTSGASWKTGELEFEAYMRMLDSMGYKTGYVYKNPEVFQGDQKADRMV

ATPATVTSTRSRTPHYTPEIERGPVRRAHSTGRANTYRNRLKWLNTPVKSTEYKKEKEK

AEINEDYEPAIIKDLQPEKEDKDVEIPNKQEVAEDIVLPMTKVTEVESVPYDKGFFNGE

ADIAVKPDGEVDGRADTAPADQGAIELKAELSVPGAEEGISPRKKKGTKVKKNPSFKDK

IVKRFGRKGERPKSERAEQGETANDKAE*

>TRINITY_DN1737_c0_g1_TRINITY_DN1737_c0_g1_i1_g.71966

VAGLITSTEGSLPRTDFIMLPFMVLVFCASLACCLGKPAGDMPVDRCYPPDQLEGRMVHI

AANTDVSIMKFYADHTQKAMRYTGKGWDVILLWNQGVQYTIAGGKCYRFKLDPNSYHPL

GVSDSFNLITEGQLGGEMMVQAYGVVFNGSGAMYVVSKKTCAPAYLIAKQNNETSVTNF

LDVRTCVSAGAFNVPAVCRMSPSASHHRDVPDVVPFKRGLQWHYGRK*

>TRINITY_DN1772_c0_g1_TRINITY_DN1772_c0_g1_i9_g.72338

FIQQDLVIPGEVTEREKLSLPCNAEGGGLKWEWKFNDLHIAAIDPTGRDFTIDANSGKLT

KKSGQGASGTYQCFVRNSQGKTFSRKLKVKVTKVPSFVDPDDTVKSQNVQLGKPTTLVC

PKRDAEGYGVEYQWGKSVGGAFEPLQQNERRVVTPEGNMHIMFVTQGDVTEIKGTNGKQ

CRISAGNTYDESYSINVEPKGQAQTSPIAASFHESLPPKTTAVQGRSKTLHCIPTGNPV

PTITWKKRAKDGDPDELIDKDNSDTDAPFKMFQFGRNLVLNNVKKSTHEGIYTCEAKQG

SGDPIKTETVVTVQVPPYWSPENPPKIKVIDILGNGTLTCPGKGDPNPTFTWYKNGDPL

VENDHVKIDGDRNKLQFTNVRLDEDAVYQCAVENSVSMKVGATWISVKAKAPKFDQLGP

FYLFRGTDSKLKCEPDAAPLPSAVWTRKGGTIKSGGRYALSDKGRTLTIRGVKDADKGK

YTCTATNQVGSDTATGEAVVLDRTEITVAPRDVYIVEGKPFDLRCEAKADASLELMYKW

YKDGAELRFNSRVVWRPGANTLTVFVARTDDTGEYTCLAYTPEPKKSEARKSAIVSIRG

APDPPTGLAITNCYELSTELTWTPGDANNGSIIYYIVEQEDASNRNVFIFHSNVTQPNA

TRTTLSLTAWANLRFRMRAVNRLGTSRPSEPTSQSCVTKEQAPSKYPDNFRGVPKKADE

LDIAWDPLTKLEQNAPGCKYVLSYRKDGTTSWKTITITDPSVGQYPVPNAGYYELWEFK

IQAENRVGSGPESPIRKSRSGQDAPKNAPTDVQFGDVKARSIELSWVRVTVDRGSVDGY

TIYYWSDSQVPSRKRRAIAANALSYKVKSTGQDPRQRATLEGLKPFTDYKLAIVAFNSG

GESPQSNEVAFKTLEDVPGPPEKVKVYPFGKYILVTWSPPVEKNGIITGYEVGAVKYEN

IQDVKTIPREPKASNTNRNLFRDLEFKSKYAVEVVAKNKIGAGPGVRKFTNTIEESVPA

KPRAPTVKADSIDSVVVTFLFGLEKGGYPLEFNVHYREKLDDEPWKKTGWVDHLDTQSV

KIDGLDNVLYEFKTVAKNDVGESEESGTTDSRPLPGIVAGARADEPIHKAPWFIVLLVV

IALLLLVLLILVLLSRRGRSRYPVGKRERGRAAILDDEPEEEDGIVFPRTEDIPPNYQS

QGSLHKSNLSDSDRDSLDDYGEGPEFKEDGSFTREYGDDKDGIKSPDQKDQSAFATFV*

>TRINITY_DN1853_c0_g1_TRINITY_DN1853_c0_g1_i7_g.102319

MAEQAKPNLSEVESFEHSKLKHVKTQEKNTLPSDETIKQEFVPDELPDRSELGKFDRTQL

KKTETSEKNSLPTKQTIEDEKRTAPFSGVEVFQKSTLHHTETKEKNPLPTPQDIRSEMM

PDRSELPDRSEVATFNKEAKLKHVETTEKNVLPTKEVIKEEAVDSRAEVKAFDQSKLKH

VDTTEKNPLPTQQMIYSEMMPDPSKRPDRSEVANFNKEQKLKHVETTEKDVLPTKEDIK

EEAIDSRVEVKTFDQTKLKHIETEEKNTLPTAQTLREELVPDNCPVRTELKGVAGFDSS

KLKHVETANKSQLPTKEVIEQEAFDSRAGVKSFDHSKLKHVETAEKNTLPTTQEIRAEM

MPDTLPDRSEVTKFNKEQQLKHVQTTEKSMLPTQEDIKMEAIDSRAEVKSFDHSKLKPT

DTKEKNVLPDAQTLREELRPDVLPARAELKDVEGFDKAKQLKHVNTEEKSTLPTQQVIQ

EESRETRAEVKSFDHSKLKHAETQEKNALPKAEGKCSLF*

>TRINITY_DN19086_c0_g1_TRINITY_DN19086_c0_g1_i1_g.113845

MAEQSREDLVKKAKFAEQAERYQDMSEAMKKLVESSKKEETLSSEERNLLSVAFKNVVGA

RRASWRVISSLLAKNPDPVAEGYLNEIKAELDKICEEVLNLLDKYLIPSTHSSDDPESA

VFYNKMKGDYLRYLAEVENSDKKAEHIQKSKGAYEEASKRAMEKMPPTHPIRLGLALNF

SVFYYEVDNNQKKACELAKQVCAFLW*

>TRINITY_DN19848_c0_g1_TRINITY_DN19848_c0_g1_i1_g.79393

MNKCIPKINQQITATGANGSLTTEVLDECRTKANFAADVYKQSFDRNMKTLALILLVLVV

VGTAMAKKQKNPLCKGKKKVVCQKLINCHEEKTKLHAHVKELQGEVGELKKPVVRFFMA

EPATSCDTQCGRFGMKCVPEGFAGKNVKELFKNLGLPCASEEGYVWADQPCYAFGAKHC

YGTTGLPEKINCAPGQNGSVRRLCPCA*

>TRINITY_DN2035_c0_g1_TRINITY_DN2035_c0_g1_i2_g.8174

LFVRYQAPSFVKVLAVGAICASNRSMSLLRVTVQRASNLPDVDFRGKSDPYVKVSFQGKE

YKTEVIEDNLDPEWTDKNVFEWDLGGQPLAPDATLSVQVKDYDKIGTNKLLGQTDIPLR

DLIKNHEHRIEQIYDLISGKKKPTPGKLQLLLEYTPPPSEQDEGGDGDGDGEEGGMEEG

GGEEDEILDEAGGDAGEPGAPGQPGKPGSRRRRSARKAGRKRGGRQWSTKVQDFQIRIR

VLEGRRLVGNNVNPVVRVTVADQAKESTVKKSTNKPEYNETFFYNFNKSEAELFDEIVQ

FEVFNSLRLRSDALIGYFMLDIGSIYESKGHAIVRKWVLLSGPEGEEDEEAEAEGGGDA

AAAQSKKGKPRGSSGASAGYLKVTAMVLGPGDNPPAAAKAEPKDDEDDIEANCLMPVGV

ARQPGIFKLKVYQAEDIPQMDAGTMQSFKKFFSFFGSKEDEEKKSEDLVDPYLTFSFCG

KTERTTTHYHEDCPEFKEALQLSIMFPSMCERLKIQMFDWDRATSDDCIGTAFISLSSI

SGQGEETEGFLPSFGPCFVNFYGSTREFSNLPDEHEDLNKGIGEGVAYRGRALVELETV

LTDELIKNSIAPLEDEDVVMVQPYLRRDKFKLFACFYEATMIADMDGPIEFEVSIGNCG

NKFDESVAPSNTPPCNAVFDGTHYHYLPWGHEKPCVCVDSSWENIAFRLEPRNILTRMA

ERLEHNLSRLKKEVEDTPSHKEENVYRIVASILDNYLAECRKELDRFKNDIPKIEGKRN

KLDKQTQQMRVDELTLMIEDINILQWKMRPPTPPPQEPIQPEGGEGSETIEVAQEAEEG

EREEEGDKGDSDDEEEEEEEERELP

>TRINITY_DN2216_c0_g1_TRINITY_DN2216_c0_g1_i2_g.113162

MSDAVEEGYSSRRRRRIAEDDTEDEAAKRREQRRKEREARRAEREKEDNDEEERRKAREE

RRRRRDAGDDAAGEETASSRRRREREEAKKKEEEEARQRQEEEERRRRGEEEQRRREEE

EQRRREEERRKQEEEEEEEEEEEEEEEPPSRPQDHMDAVNGEPEEEEEEEDDSIFAQMS

PQKKQAILDGLAAHMRGIVEEREAKSQPVTQVELDELDLKIRSLKTQVRKQEETQMQLQ

KQKRELEEKVTRNESTLTRLRTELKNAENENELAIKEGRKTKAAPGSRPVAKKVEPKGL

GFLSVVKKAQAAAWEDKFKAMREKKKNQAPDWLQKAKGRSPISVGRANVDKKKEAKPNW

SGQVALKKTERKTASDQEGAKVDFRGQLKKSGPKSPAHDRGGDAGNEPEWKKVSLRSTP

KGGDE*

>TRINITY_DN2263_c0_g1_TRINITY_DN2263_c0_g1_i4_g.113394

MATESPGRASKRLKLSNEETGKINEGLKSTETKEGSVSGVTSVSKTAELPNTTSTTDKDD

VVVISSSSSDEDSEKCNEKERTSPPTVKQGTKQVEQQDNVRTVDNALRKLVVKLEPCQE

KNMIKLTASPKKQPQNLSKAEARNQSGPVESSGSGQREDAPISGRAVNSHSDSDSDEVI

SQEDLLAKLGLSSVKELNKKESEKGVDSNLPKSDGKPLFPHRPKESIIEMLKVPRIFDP

NKGKKNGEAGAVVVNGVKKEDSRSGSANESSDDEDDSMKSKEKLISRLRNELRNEEAKL

LLLKKIQAAQNDNRVALPKSQKENMVAKTPVPTVPQHGLKLTNQISGKKSQTLPPPPPL

KTSSSSSGAPFNPQRILPKSGSQPTTQSSVYSKFTISPSPTSSEKSSSAIKNLQIVVSS

MTNLIQPSPVYARSSSQSSSPLYTTPSQPAPVRPTPVRANTHSASSGYVSFQQHLSQSS

HHSASTSSGKQAAAKMALRKQLERTLLQIPPPKPPPPEWSFIPSLNSPEFMSLIGMEEV

VNGLTAKPSKVPLEEKAPENPKVCSQCCSDFTPTWKVREGGVIVCERCSTLNVKKELKA

EHTARLKQAFLKALKQEQEIEQKMTDTPPIAPKPQTQRSSAQPLSSHHHIAHHQPVMHH

HHQSVQPRLYHHHQPPHSESLLFQLQQQHLQQQQQEMEVARRQADARWHPYLPPHRHSS

HKTQHHHPTYISDSDRQYLLDMIPSLPTNLGFGSSRL*

>TRINITY_DN228_c1_g1_TRINITY_DN228_c1_g1_i2_g.30839

MKKRGQTKSEASKKKRPKLETADDDDVLRQTQRGLFFDKPRYGIFMTLTYKSGVKPDAVK

DEILAAVKNVLRFALDLEKNEDEASRTRAIAAFNPDQWKAWFPREPHLSELEGRPSGSE

QGFLIPTSDKFIDTGGDIFFLLKSNAANQCDKVCEKVRSELKDYCDELDVTKSEPPSER

IIQNSFRDGLANPCDSASLMNAVVNSDADSKDGFPGSTFLLTQKFKFNWLALGALDQTQ

KEDMIGRRMTSDAFGGFTHSRAHMKRAHVLPESMPVDLTQQHSRVFRVSMPYGVDGSAA

GREQGVMYMHLCNTTEVFKRILINIAGSKSKSAPGEVTVDALLSNVQAQLGTWWYVPSA

AELSLPTFVERRFDLLDHWNVGSSNDYMFYNQKEYMHRMTTDGYTPGDPPSSRVMSLVD

YMFCHWNDQWFQERVWPPMPHLFENLKTKKNKKTVAKVMTLSVALRKGWAIKRTLGGLL

TTNKPEKLEDDNFYGRKAGTFSIHPDDFLAGRMPPTFSLGLSQLAMPYLHDKEVMPAFV

KGLSEAGNFGHIIPHYQTLLDKGIQKLIDELRAASTKDAAEKDFVLSCILALQGIQKYH

KNYAFLANYMANNLSFNYSEAQRANLREVAQRMDKLRTQKPDTFVEAVQLIFSFHCCLH

LTGEPTSIGRLDQMLEPYYKDITQEKAQEVIDCFWMKLGEPVMLNNRLLNDQGAWGACA

VPYSSTGVFANGDTINQWVQQVTVGGYKETNDATPEDACNEITLMCLKAARRLPLNAPC

LSLRMHKKMPQEVLAEAAKCLLSGGAHPVLLHDDRLIPGFEREKPPGVALDLKTRRGYA

CDGCYEPIFPGLTEFSLAYVPFLSVLEMTINHGSTFGMCGPAYLEGTPQSLPTAHAKDI

KTFDQLKEIYAKHFRVRVEYSIWLLLLNYGNLHTVCPSPLLSTLILDCVAARRDLTNGG

ARYPMIGVQFISFANAVDSLYTIKKLCFDHNTSILPLADMVKCLKCDWGNRMQEPWHDE

LAGPTHGQRLSDFYKDVREKSLRLPKFGTDEAADNTDIQEISGWLADLATNTIQTVARG

RDGQPLNDLIKSLQQKYSVQGYPWDVMLPPGSGSFEGYVGWGLGLAASADGRRAGAPIA

SDMSASPTPQDKPAVAKKNDIYKALRCWNKQSINEHFANGTEIDVKIEETFTELDLVGF

LKAYADQTAEVGGNLMSITCADEKTLSQAVANPEQYDLVRVRTGGWSEFFISFFSAHQQ

HQQRRQYYHVTH*

>TRINITY_DN2345_c0_g1_TRINITY_DN2345_c0_g1_i10_g.61734

PGLLTVVGVCQVRMAEAEKAAEVTPESQEDEKKEEPHPPAQPELETMRSIVLTGHGGYNK

VQVQKYAKPKPMQGQVTVRVHACGLNFADLMQRQGLYSAAPKPPYVGGLECSGIVEELG

EGVTDLEVGARVVCFGNLGNWTEYASVDAGLCFVMPDDMSFEDGAAIPVNYLTAYLMLF

HLGNLGKRKSILIHMAAGGVGVAATQLCKTVEGVTIFGTSSASKHEVIMDVGVQHPIDY

RTTDYVQAVRKVNPEGVDIVLDPLGSPDTKKGYDLLKPMGAMICFGAANSMTESKGMFS

SAKQWLKGITLSPSKMMADNKTVSGFHLGKIRDKQLLQDAMQALFKLYTEGAIKPRIDE

VFAFEDIAKAMKRMHQHKNVGKIILSPMKEPEPAPEPAPKETKTANAQEEDKPAEEGEG

KAEESKPEGKDKADEEGKPEGGGEKEKEDSKPEGGGEKEKEDSKPEGGGEKEKEDSKPE

GAEEKFEGEAKVDEVPAETDDAAATKADESKASDEASDTPPAEAGQADEAAASS*

>TRINITY_DN2362_c0_g1_TRINITY_DN2362_c0_g1_i1_g.61894

DFGAVTEGAQTRVEYLLCVPSNFDIRSYTMSKAVCVLNGEQVKGTLHFEEGQDGSCKVSG

TVTGLSEGQHGFHIHEFGDYTNGCVSAGSHYNPFGKTHGGPNDEVRHVGDLGNITAGAD

GNAAVNISDKLVKLTGETSVIGRSLVVHAKVDDLGKGGDEESLKTGNAGARLACGVIGI

CKA*

>TRINITY_DN25145_c0_g1_TRINITY_DN25145_c0_g1_i1_g.55774

SKFKWTSFVTRFPSQLEILDLEGRGKHWIHLADRSEEPQPPSLSLPTKANSAAKVSPLLS

VSAGTANVTTCVTESTQVDNVPDTKEGNSGNGHGEDGSLLDAGFLQAVTTPSTNSLDFT

SEGRAAATKLSAEVLVEELEERLLDSVSVFLQGKQGPELLSKIEAMPQIRKVLDKIQTT

TGSRFRWMPLLKKFSTKVDEARDQLLPVRTKLEDLDEGDPFQLSLGTSGDLIILVDRAT

TSAPSATTLGNNSNPESPPLATTGSNLSRVGVDAEANVGRKETAEQSTSCTSDAHVMYQ

LEKDLVELLCEYLTLSTEPQLLASIGGHPPIKAVVKRLRSGGRLSFKWKTFLLKYTDHF

EVRLSASGGMERIALRRSEEPSPSSPDIRYDRNPVEEPEIEETKIDVVVGEYSSSSGKG

GRGSREQLAATVLQLSVDSGDVSAPAFEEVQTLSKNWQTRNRVVTLPATQGNRTVSLSA

ISPSSDPDNGTCPVFAEQNCPAIATERPKPHSGNQSVNRTLEPDELAANVASVSNDRCK

SSEEIEDELISKVLFLLEAEPGPQLFGKIAARPEIREITHKLASTTRSTFKWMPFFRKF

STQIQIKKEKGGLHYLSMVDERGDSAPLPDSREHGLGDDELFDVPYRSEIPEMDMEEEE

ISRQCLSCFDKSEWVKAGAMAEEIQGATSRAFSSKPTDKLFELSDLEGTLNVPTFSPNS

ADGAKPKVVASTQIDDGKRSKLEGDICKHLVRRLRGSKNAPILVCDAVNDFELMSLIRQ

VLELPSGFFKWIRFLENHRDLFETSSAHTPNFQFRLTKDYLNALSSLGFSNESDFSPST

KVTTLATKVSLEELERQLVEAVCDILESPEKLSKVAAVPNIAEITKRIKAFTKAKFKWV

PFLKKYSAQIETTCVHDPGDHWLSATARNKDSC*

>TRINITY_DN261_c0_g1_TRINITY_DN261_c0_g1_i21_g.30931

FTTCIWMRSTHQLVGKNEAPLFSYATSRSDNEFLFFIGGGYLRVLCQAKSATVDYKVNEK

VNDGQWHHLCSTWENSAGSVNIYKDGERLGGAVGFRKGQKIVAGGLLVLGQEQDTVGGS

FDSNQVVVGDLSGANVWNHALTAQQISTLSKSCLAGEGDVFKWSDFRSHTHGNVEVNEP

SKCQA*

>TRINITY_DN26_c0_g1_TRINITY_DN26_c0_g1_i3_g.3085

KKDVCAKQLAASPGGSSLTITDQMLCAGVENTILSGCHGDSGGPYVCQNSAGRWVLQGAV

SWGSPRCSSKERFSVFARVAKFRNWIDQLTGGIVPPNSPPPNTPAPPNTPAPPAGFSCN

FDTDFCGFTQCKNDKFDWTRRSGSTPSSGTGPSSGHGGSGSYAYIETSSPRVNGDKARI

YRAISLSGSSCLSFYYHMYGMNMGSLKVTVGGQVVFSKSGNQGNQWHHFQGQLSGSGNK

ELEFEGVTGSSYQGDASIDDVRVFDCQAPPPTPPPPPPPTTQRPPPPPVTTQAPPPPPG

FSCNFDNDLCGFQQLKDDDFDFTHQRGGTPSGGTGPGADHTSGNGKYVYIETSSPRRPD

DKARISRQVTLGANSCLTFYYHMYGRDVGNLFVKLGSQIVFSLRGAQENKWKKAEVRLQ

SSGSVQLTFEGVRGKDWQGDIAIDDVSIGACGASTPAPPTAAPPPPGSCGVRPNTRIVG

GTAAKHGDWPWQAMLRTSSGFPYCGGTLVAPQWVVTATHCVDRKSASSVFVRLGAHKRT

SQVGTEQDFKVAKAITHPSYHKPKRYSHDIALLKLEKPAQMNRYVNLACLPHSVTAPSD

GTKCWITGWGRLASGGATPDYLQQVSVPVVSRARCDRAYPGKIHDSMICAGLDQGGIDS

CQGDSGGPMVCETGGRYYLHGVTSWGYGCASAGKFGVYAKVTYVMKWLNDEMAKN*

>TRINITY_DN26_c0_g1_TRINITY_DN26_c0_g1_i4_g.3083

MYGTDMGSLKVTVGGQEVFSKSGNQGDKWIHFQTPRLSGSGNQELVFEGIRGSSYTGDAA

IDDVRVFDCQVPAEFNCNFDTDLCGFIQSTADQFDWTRQNGGTPSYNTGPSADHSGNNG

YYVYIETSSPRVQGDKAKLSRTVSLSGSSCLSFYYHMYGTDMGSLKVTVGGQEVFSKSG

NQGDKWIHFQSSRLSGSGNQELVFEGIRGSSYTGDAAIDDVRVFDCQVPAEFNCNFDTD

LCGFIQSTADQFDWTRQNGGTPSYNTGPSADHSGNNGYYVYIETSSPRVQGDKAKLSRT

VSLSGSSCLSFYYHMYGSDMGSLKVTVGGQEVFSKSGDQGNQWSRFEVSLSGSGDNLLE

FEGTRGPSWAGDAAIDDVRVYECNAGPVTPPAPGACGLRPNTRIVGGVDANHGDWPWQV

MLRSSSGRQYCGGTLVAPQWVITATHCVENQSPSVTFVRLGAHKRTSDVGTEQDFGVTK

VINHPSYHSPLRYAHDIALLKLDRPAQLNKYVSLACLPDGVPDPGDGTKCWITGWGTLS

SGGSQPEILQQASVPVVSRARCDQAYPS

>TRINITY_DN27605_c0_g1_TRINITY_DN27605_c0_g1_i7_g.21967

MMCKVSVILVFLSTTYLASGRGVRNENRLPEADPHGARFAPGREDARSILETGTRRKREY

RLDNRYLQNQDGKYISVTASGAVIGKDRCDSHALFTYVIRADKSSYLLNKATGRYLAID

SSGKLYTSINGRSADADLGLMPSGGAPRDNHIYRMDGTGGKLYFALSKQNQKVSKQEAD

VIHVKSMCT*

>TRINITY_DN277_c0_g1_TRINITY_DN277_c0_g1_i5_g.32030

MVSATLNGEGYSGSFPLAVKSVEDNIRAAINARNVRLTEYFKDYDRLRTGFITKPQFDRC

LDQLFGIVLSTEDDQTLMGKYMSRDPKQSGMVNYRRFCEVIAADFEPNALNLDPSSQRI

GSTASEPVDRRPLSPASLSKCDELLHRMARYYHYHGINIKTCYADFDKHHIGVVTESQF

YRSFPGPPDVTEGETRLLAKKYRDPERAGLCNYYSFHEDIREKQQALADEADFTKLSKN

QGMFDDLRPKRPSTPSLQDIFEKIRVAVYKNGVRTTEFFKDHDKLRSGEITENQFVCGL

SLCCSSQANLTREEIKKVVDYYKTEDGRVKYKEFCDTMENAFNVPDLEKKPTSEVYRPM

TGSLAKAPNLLTPEEEQRVTEILQDMADKVRKRRLMVYPYFKDFDRSKGYTRGVTKPQF

ARMLHFLSLDLQSQELALLCRKFEYPFGGDINYPAFIQAIDSEYIGTATTISDFSKNRP

QSPPKSPPALDVSSVDLAELVGRIRHHVLVNSLRVEEFFQDFDALRHGSISASQFRRCL

DRMVPQQLTKAGVQVLAQHYADPKLPGNVKWTKFLEDIDIVFTKRGLEKIPTHQVAAME

TFRMSRPGEQSGEVSDSQEELLNSIQRLMTQKIRQRRILCKPSFQDFDKHNNGHVTRSQ

ARQCLLNLSLTNNDEEMKAVEAKYSDDTGFNYIKFLEDVQPSEKPELKYVQRLEELKRV

NQKVLPDLGEEDTELIMHKIRSKVIKERVRVLEFMRDYDKLRTGRMLKSYFPRALDMCN

LGLTKAEATKIMDRYISPAFPDYVDYLRFSDDIEESFTLKGLEKTPLVIPQQYHLHPES

ENRNLLPEAEVTLERVMERLAQRVRIRRIQLFPLFEDYDRVHNGTVSRSQFHRVLSELE

LGSLVSAREFAVLYKRFDVVVGLKHDFNYIAFCDLVNEYAKFEYGKP*

>TRINITY_DN2934_c0_g1_TRINITY_DN2934_c0_g1_i18_g.6267

MSNVTNADVQKKCPAFIGGGCPYSGLPVEKKGLAGKCPAFAKGTCPFAECKSVGEFQDKL

SQMRDQSKGDAEHQDFLKAVMLTSQEKAVELGRACPFFSKGCPFSHGKDILNPPCAAAP

FSVSHCDLKAKHPVFKEGACPYSNLPKEMKGIAARCPAFKGGCPWKSCKTVGEYVEILT

KMRDQHKGKAAVPVKRVFARVIQVSKDMEKKLSLCPFMQHKCQFMNDVHGKPIVPK*

>TRINITY_DN3155_c0_g2_TRINITY_DN3155_c0_g2_i1_g.37800

MMTKIILLALFLFVATDAVEGGECNKNALCKGLEELKKRVDDLEQELHDLKVGLRDYSLH

FPKIGTTDYASMEGMPDLGAITTCIWMRSTHKLVGKNLAPLFSYATTRSNNEFVFFMGS

GYLRVLCQDKNTNVVYQVNEKVNDGQWHHLCSTW

>TRINITY_DN3260_c0_g1_TRINITY_DN3260_c0_g1_i10_g.61198

GGEVRPWFVGRLVVSLLWRGWCSDPRVGGPHVALWHACARMDDGKHPSVGEGVVSRKVCF

HWTSGNCQWSKVIQVRNCGNFYVYKLLKPPGCSMRYCGEQAGGGGTPAPPNSPPPPPNT

NTPAPPSGQCGKRPAGSRVVGGQDAAAHAWPWQISLRVNGGHICGGTLIDAEYVVTAAH

CVYRNPQASGYTVVVGGHRRTGSTAVQQTRRLKELHKHSGFTMQNLRHDIALLRLESPV

QLSEKVSPACLPSSKPAVGAKCYITGWGRISGGGPAADILQQAMLPVVSTAACKRKYGS

IIDESPHLCAGSGQASSSGGCNGDSGGPLVCEEGGRWLLHGAVSFGMRNCPTTHYTVFA

RITSYMKWINDRRSSGGGGNPAPPNSPPPPNTPAPPTAPPSGECSNPRLLSESDRVRTF

NDRKVVKCDRGLSEGSWYRFSGGAGAQIPESVVPTWHCGTHAPGWMDGKHPSVGEGVVS

RKVCFHWTSGNCQWSKVIQVRNCGNFYVYKLLRPPGCSMRYCGEQAGNGGATPPPPNTP

VPGTPPPPGSCGIRPSSRIVGGVAAKHGDWPWQAMLRTTSGFPYCGGTLVSPQWVVTAT

HCVTGKSPSSIIIRMGAHRRVNNVGSEQDIRVSKVITHPSYHKPQRYSHDIALLKLERP

AALNRYVNLACLPHSVTAPSDGTKCWITGWGRLA

>TRINITY_DN3260_c1_g1_TRINITY_DN3260_c1_g1_i1_g.61226

RRATLAPFESHVMWLIAGVLLSLLGTSLSQGACGKRPSGSRIVGGSDAQAHSWPWQLSLR

VFNRHNCGASLISREWAVTAAHCVDRSSDPNRYTLLAAAHHRTNGGQVLRISQVIKHEG

FSMQHLRNDIAVLKLASPVTLTPKIQTICLPSQGSRISAGHQCYITGWGRISSSSNVLG

TYLQQAKVPIASHQQCRSKNGNFVHEPSMICAGGVGSSACNGDSGGPLACEENGRWILR

GAASWVTSRTCPGHTYSVYARVSEFINWIATKTGGNQGTPAPPTGGPCGGTPAPPTAAP

PQGECSNFKTLSESDRVKTFNDRKVVKCDSGLSEGSWYRFAGGAGTQIPESVVPMEHCG

THAP

>TRINITY_DN357_c0_g2_TRINITY_DN357_c0_g2_i11_g.106115

CYNWHRSTQWDDNMEMFKTVFFILFLTRLAEDLPLDDKNQSETSHLRQRRLVANPVASGP

APACYLQFFSGSSPPQGLPYTEANIRYICQKLPSDSTNYYATLFDEEAGIAVFSAYTVT

ATQARGIGTFDRNDVSQSWRTESGLRYQGTNKMYAGHGSGREGIHKGHLNPVNVNSFAK

PNMRATFTYTNAVPQYGTFNSGQWLAYEKRIVEYVEEKCAQRPSAVMYLLTGTSAFRLR

VGAQRPTQDPSAPQVHYFPNDVDEHIVRPNSMWTAGCCIWGGVEAESLAVMGNNDYDSA

KIQMTSLLLQELETLLTAAGESANLFPATPKCRVNSI

>TRINITY_DN360_c0_g1_TRINITY_DN360_c0_g1_i8_g.104967

LYRSRGLLTDCVSIFIVASECHSINKMVGIKLSVVIFALICVCQSKTISKKKPHHKKPAQ

HKVHDEKSGDPCSDTDEAYCEKWAPKGYCDNSFEDMTKKCKKSCKMCEPGGPEMDDDSR

CHLWAKEGFCEKVNHQPFMLKHCKFSCKEFIKSNPAAVQQAASGHRVPPSPVGQQGAYG

QQGYGQQPYGQQLPYGQQQPYGQYGQQQPYGQYGQQQQGQGGNTGTNTEQPAAVQPTQP

QTGEMPQQPAQPVQPTQPEQPAQPVQPAQPVQPAQPVQ

>TRINITY_DN364_c0_g1_TRINITY_DN364_c0_g1_i4_g.105541

VRVRAFTVDKGPASPLQNATTRGPPPRVINPDKMKLDTTTVTVPVENVEELSTGELVVCT

QFILVRQCTEQSNLGSSADPQYDQEKLGTYENEECDKPYITAAFESDPSRKEFPLGDGE

TYSCAANTNSRRRRRSATGGPYLNGKLKDGQTYSFFQRSFDKDNNYESLGFAKFKTEKA

FPIEIVLGVLIPVLVIVIVGAVIFYIRRRKSQSDDEPLEMRQSKVRRLTNRIMRQRGES

GAFDNHQPGEVLSVHEFERHVRNLHANGDLLFSQEYSSLKPNREFTWEGTLDPDNRIKN

RYNNIVAYDHSRVHLAQIGGVPGSDYINANFLDGYMKKKAYIASQGPLPETCNDFWRMV

WEQGSRTIVMVTRCEERGRIKCQQYWPDEGSQTYGNIEVTNMHMMELSDYVVRSFMVKQ

AGSRGERMISHYHYMAWPDHGVPCSKTSILNFVRKSSGANPPNSGPIVVHCSAGVGRTG

TWITIDAMLQRIAQEDTVDVYGFVLQMRNNRNLMVQTEDQYIFIHDVLVEAILCGYTEV

NVQELRGHIRKLMEVNFDTGSTEMEAEFARLGSSSVPMTRYQAATMPYNKNKNRYANVM

PFDETRVHLSIMPGIEGSDYINANYIDGYMQKRAFIATQAPIPDTIPDFWRMIWEQESC

TIVMLSNVEESGKVKVHRYWPSKQPTSIGSMVLEMTNEATYEDYVMREFKLTSTTESAS

RVVRQYHYIGWPHVGSPESGGGLVDLIGQVQRWQQASGNTTIVVHCSAGVGRTGVFCAL

SVLIDRLKSEAVVDVFQTVKQLREQRPAMVQTKDQYEFIYRALSEYLDSFDTYSNFH*

>TRINITY_DN3700_c0_g1_TRINITY_DN3700_c0_g1_i1_g.51537

MGLCMSKICQCHFCRCCECGPGCHCCRCCKKYFGDWWMCSDCCESDEEDEEYLTAVKAQR

AQKPPDEGEGMYNYPNGDFYVGEWRRGKRHGYGEFITKEGARYVGFFYDDEYVGDKPDD

RLRRSPVTSRPFSKSIQKDEDNANVRKQDADEIEKARAAEKELLRDKNGPSYSSVENGN

*

>TRINITY_DN37267_c0_g1_TRINITY_DN37267_c0_g1_i4_g.62755

MEPKKMNKVREKFSAMKEAIDQADLRKQDSKNGLKAAEDRALQFDNEAQSIKRRIQLLTE

RLNETNVRLDKQKEKLDNTSGKHRNEQAAGNELASLEDETEDQLAILEADVKDAQKLAE

ENQHKLVEAQRKFTVIERDLSKMVDKAEAKEKAVKDLEKTITMMGNKLKLLSDKDEDAS

EREDDQERQAKWLEEELQKKVQECEDLAREVSKLERLSDQTSDEVESWTKKKEAVQDEM

QRMCDDVDDDDF*

>TRINITY_DN37357_c0_g1_TRINITY_DN37357_c0_g1_i19_g.20205

MPLVDKGDKFTPTSAVMATMSPAWVLLVIFIHQWHGSQCQIVDIEPPKFTFCPPEKSVES

SQSTVRVTWDAPRVTDNTGMAVQVTSNRQPGEEFKVPGSYLIQYKAVDVSGYLAVCNFV

IHTKHPDTEAPKFISCPPHQEIESEKSTIRVHWDTPQVSDNSGIAPTISSSRQSGDMFT

VPGAYEVIYIARDASGNQAECSFTIITKKKTCAMFSPPIDGSLKCQNINGEPFCSVACK

KGTDFAFSPPLLHYCTSGTWNIWAIPGQPYETRLPWPDCSAQATPSWLNSQAFSGFSFT

GDCNDPNVTDGLKEDYWNFLRGPYVPPPFCTMNANCRKEGIVIHCGKSSSKN*

>TRINITY_DN3812_c0_g1_TRINITY_DN3812_c0_g1_i2_g.4515

MSYLERSPYSSGAAEPGLSSVIKRLEDQHLNGDPGTKSPTVPSKIRDIVNKSISPIDGKM

ASPSMGDENRMLQSEVSRLEDLLAATRAERDEIGSKYMAVSERLDQHMKGGSPGQDTAS

PGAYLSRSGELPSPGDSSLVNQVSYLKSKLEEEHTNYKRKLQAYQDGQQRQAQLIQKLQ

QKVLQYKRKCGELETSMSESKEHEEGVRKKLESMENSLKEQEAKLKETEEEHSSDLENA

LIRLEEEQQRSAGLQHVNNMLSDQLEQATAANQQLTVDIQKLTADWNKAREELEARDEE

EQSYFANEHNRLMDLWKTLNSFRRQFNEMKSSTQRDLSQVRAEVNKSVRVVQGACMDLD

KNLRGMDANTQAALEEERARRQRSEEQLREKVQEHIELQNDYDKEKADLTTKVKELANL

KGKLEAQLAERDNEIQNLTKKINSMEFGFAKQSEEWESASEAGIAAMREEAEILQNTLR

EITHAVKQDADTSSRLFGSPGPEIEVVDASLLEAEDDWDTSKRPISPSRAARVRSTSPT

RARSPAHSDNALGMVHSAIRKKNMQVQEMKGKMENAVEMEKATKKQLENAEGEKRRLEK

ALAAARDEVDATRQKVTEASQDRERFKAHTDTLHTEKQNLEKVRQSLHEKSEGLMSEVE

KLQAANNELQRQRDNLEDDNEDLTREKERLTKEIQRGQQVIEQLEGKQSVLKEDVVQLK

EQLSRALLEKEVTEQEKSHVSEVLSKSELQKAELELEMNKMRSEEVALRDALVKLQSLN

EGLGQDKIELNKIIKSMEADKSSLTNEKRELEVEKNSIRQELIRVEQEKVDLDTEKSTL

DQNLSIHEASREKLEQELVLANRERAELGEALNQVARERDSLHDELVQTQREAERQSGN

VVRLAKEKEELTREKSSLLVQVNSSERENRGLSENNASLKSEKESLETALYELQQTATK

LEARKEALESENQELLLAKEALTVDLQRVRKEKEIEETKLQKEKEVLEQQLNQTRRDGE

VAVKRSEQRHEEDVERLKREKESALLQANQEKEESLTQMKNEKEDLGRRLEKEKGFLVN

EVALVQKERDDQLLMAENEKQEALHAAANEKAALVERLTKAQNDVGNASVEIDRIKREA

FSKAEQDKTAISQLQNELRKTQSKLEDVSNKAQGESGDLKNQIKDLSKVRENTLREVGE

LKLQLKMVEEARDGIRRELIEAQRKIREGDEAREGVRKENTDLKRQLKDEEREKVAVQE

TANELRGKVKKAEAEKTNLKRVLDEANQKIANLDENRNAVQKEAGELRASLREVEKARL

EARRELQQLHNQVKMLDSECLKSKKEVSDLKDQLAKDEHLLDEMRRDNYNMKQKLVDTD

GQKEAAKREIQNLSRKMAEMEEDNRVREKDYGAALDETRRAEQKALDKVKNLENILDNS

NQDNSDLKLKLSGSEGRITGLEAQLARVEGAKNDLEFKLTSLHSTLRRTLGIKPPSEMG

RSPSPTRARSPSPRRRMFGANRSRSPEKGLEETDAGERPVSPSRRFSPSKSMDASAEID

PETVRQALRDFAQSMKDAERAKEEAVNRANALQKTIGEMEEERRGIDERLQAMQKTLGE

AEEGRRGADSRLSSAQTALMLQEETIRRLERERKGLNEKITALDTSLAQAEADRRQLRD

KVAQLQQTEAKSDQEKEAMRAQIENAESRLTKVELKKRSVEGDIERMRMQAAESEAEKM

ALRERIDQLLRAQQDLESRATSLQLTVDRLTLALAKTEEEEQMSKEKLNELSLSLNDSN

ATSQTLQEHIQQLQRALTNSEHDRRVMQERLEALKSAQQDSKNRSNMLQDRIQQMKNEQ

ADAEVRRMELEGQIRQLQQMLRQQKEAEEELVARIGKLQEEKRELQDRLATFQRNLAGA

EQTKREMERAHVRLEKDKKALKNTLDKIEREKLETEEMSSRLREDRDRLDRSTVSMEKD

NEELTKQVQNMQHAMAEMEHNHAKKLVEVTTRHRQEVDTENDRAKQAQSQLEKTQLARE

RAHKQRVRGLEEQVSTLKEQLSKELQKKQSYINRTAQKSEEIRGLRSKLEDSLNTVARD

SLHEPAVLERESHKLEDSVDGSSPMRRTRSTSPVKDSSDKFTTSTPAYGSLSGARRMTP

LTSGGRRTTPGVSPLRKTRKSTT*

>TRINITY_DN3834_c0_g1_TRINITY_DN3834_c0_g1_i2_g.4618

SVQPRRPADIIDLNEIKMAPRYKLIYFDARGRMEAIRLALEYAGIPYEDQRIQKADWPAV

KANGRFPFNQMPILEVDGNVLLAQSVSILRYVSKEAGLYPTDPLEAAKVDMIIDGLQDV

RPHLRNIFFENDPAKKEELRKKAYEEVLPDQLALFEKLLKSNNGGDGYFVGDKLTCADF

YFFAMLNNWLSYGKIEVPEPIQAFPLLAGLFGRVMNEPKIMAWLKRRPQTAL*

>TRINITY_DN3964_c0_g1_TRINITY_DN3964_c0_g1_i16_g.34178

MEKSKAAQLKRDGMVMQNDLLENKRNVDRLKNEVDKREKIIRELKDSINGLENKIELYQE

ENNHLDEKIQSLDKEKEELRSQYLEGQLVLKDSENLCQLTTEERDSLNKELQGLYKTIS

DLQTRFDICSQENSTHENQVAVLTQRGEKLENDLNCALRETSLAQAKARELENTKVKNM

EEIENLGHQLTALKNASEAYKRENREKDATIEGLRSEISDLNSDNQEKYAQLARLKAEH

QSGSDENKALREKLDKTNQELARLAEISENKVEEPSVELVTEEPVLQAQMDYVESAFFD

EGDGVEHGEDELNSEREKNAELEKKIAELTERVKDLETQVESRQKEVDKLENDMDVAEE

KMLSLNIELERVSVEKAKEYKQLLETESRLKETETELESTKDEKGRVEKEMHSLETKVS

KQEVQLESSRRQISNLRELLDAAKKKALEYQERLLQTESKSAQQEKLGETLNGVMSRKD

KTIDDLNNKIRKLQDELDKSKREERKAMLSNQTLEAAQQEGEKRLQSLQEQFGEAEKEI

KSLKERRSQLERELISKQHSLSLMETQISNLTKEKDRLEAEGATTREDYRRTKETLLVA

ENQLRDNERKNNSLAKESKENSRLIDSLKASKAALSGDMSALKKELEASRNSSQDKVRK

LQGQLQQANANVSRLELTVSKIRKEIELKDMSHRDSDTKVLEMDALLKASKDRSADLRS

ELEVGNRNIVKLDQENKSYQKRVTELQHDVTQLQRKVGELETVNRKIEREKKELKEELI

ASNTKLGDLEMKNEYDEEEIASLRRQLKDASKKSPNASLEDYTKQEKKLVELKILCSSS

QDKVKEKDNLIRQLQDTRAYLHEQVESLKASLAATDIDYTKLKKEQADLQRENLEQRKI

ANEFQSELKSIELERGRLQKERDADLITITSLEENIASLTQTNEAKKDKLSELRLQLDS

LSDKQLDFEKRNFELQSKNDRYEQEATTRNAKMEELMQSRDALLNDNEVLKKNLRKLQG

DYDAILKAKGKIESSHKITLQESTVLQASHDQSRDETRQLQDDIEALRRRLAAMEATNI

ELKEKEKDLQNNILHQQSQVSKLESIHETESERIIELEHELLGVKAELGRATEDRERAL

DDLDQAAGEVENKSRRVKQLERQLDNAIKDKKALEVQIEESIGVVSESKEQLLNAEVEL

QGFLTTPDGDTDQELKTITSERDDLRKEVYVLREELSSTKGDHDKVQKKTDELEKEMFL

MKRENTELEMKLHALTKDNEDLNRELIKDQKKVTVMEQDLHRMMNEKSKLDTALDDYKE

TVDKMRDSNLALQRQIHEMRSNMDVSERAIEEKNIQLEWYTNNNKSLGEEVTGLKQKLA

VLREESDQVKHENAEISFKVHELESKISELEHQLESGKQEKEKVRKEHVGTKASLSEYK

NNYLTTKKDADRLQNDFLSVSRKVAYLEARNGTLETEKDRLKKELIVVKGENTDLKAQC

EVHVKEKGRLRSEVARAQKKNVEIHTTLSSKQDKQKVSEATLSKRFKDLDDNYQKVLKD

REDTERKYLDVARKLSKLEAEHGDCGRTVEQLQHDVSLKVKRIDVLEERLVNFQGREMV

DEGEYKTLKKKMVTLEQELQSYKSKVYRLEAYKTSYEDNLASLQDELLAAQQRVALAEG

ALKTNQDQCAAQQRELLQALKKFTEMESAYQTTNTMKVDLQRTVDNKQNKIATLEDDLQ

NLKKEQAQMKVSLEQTKGRNTTMRGEITKLQKKLLEQKTYYEEQIRELSGKEIIIASLQ

EDNDSLEKDRADLKNELESVKDELERTVLENRDTSLDLQKLRLQHSELERTLKDENERL

KMELASLQALYDEIRVSKEEDIVVQNAESSQVEALPDMFEEDAGEDIESIKIERDRLIK

EQASLTERLAIQETSIETLKRERNTARDHVTQLQKSLSEKSIETNMLTEEKQRLILELE

VTERKLRELNDEKAEWTGEKDSLIKEVEEMQCKLHELVLKSQQEKVSEVPSEQIFGTME

ADFKRLQESEAELQVELLAALKKVSVLENELNAEQERSRSLEESDRALEEKLACSKEEI

VHYQEAVSKLEADHETVEDLNEDLQSKVQQLEEELNAMKDSNKLSQESKSQWENEGTSL

RSKIKKLEAQVEDERRAKDTLKAQLQEYKNIGDKASREFADHTDELRSELDRCRADISN

KERSIREMQNQLSSLDEKIAKMSRDKNDRERACQNHISELDAVNQQKADMEIEINTMRG

QIRTAELLRGEAEKDKEDLLTEMETLRNKGDDASRDMNMQLKTLRDQLDNTKRDAVGKE

ATMRDLREQVAKTDHELQLLKKNVQSKESDCEDHIRELEDANKKTSQMEINIISLNNKI

SKLEIQVETERKEKSNLQAQLDSSKVKNDQHAEEQAKFVSELQVSVDSSRREIRDKEDK

LEDVKNELELTRRDLLSKDSQWKSCTEKLEVVTTENSELRIELMSLREKIIVLEGDAEK

EKVSKENYMRQLNDVKNQGESDNQFMSEQITELNVRLEKLGRENVEKDNVVEKLRFQNA

SSEQDIEKVKRDLNNKKTECDDLGREIDKLNHARSEDEVEISSLRAKILQLERHIDEFR

KDKEVLVAQVETLKESSDSETVVLHEQITEFETRIEEYRTEIIEKEAIIEKLRVQVLNN

DNELGKLKRDVETLQTECDGYIREIEKLNQEKYEMDSESADVRNKYEMLVKRIDEERSE

RDLTESETVQMTEKITHIESRIEVYKLEIMEKETLIEKLRIINESNEQEVEKLKRELSN

RQVECDGYIVEIEKLNQKLAELNLDFNYRCNLTLKLESQIDTEKKETELKLKTLRSKFE

DEITTLRRELETNQLECEGYIAEIERLNQEIFRLKGLSPSEDTVVREVLVAQESMPSES

EPSSHTQLTFDVKEKPLEVSSMSLSPKRMVKVRNPFMAQSATKTTSTKITRIQQNTDPR

LHAQGDQTGEGQKVSMAGTSPSTIKIRHIESSSATAANQAGIKTASETTKKQTGGPVVV

QLETEKVFTPKLTVDGGGEAYSTSGFQQPYSPKLTVDGAGEAYSTSGYQRTSSYQQSVT

QTVLERSLSPNLTVGGGAEPFPTSSYQQSVTETVLERRSLSPKLTVGGGAQAFSTSGYQ

TSVRVPSPVQFEEFTRIGTTVTATTGKEKDIKSKRAPQKQ*

>TRINITY_DN4242_c0_g1_TRINITY_DN4242_c0_g1_i10_g.17662

MKFLIFCLLFAVSHAVIRIPLTKFPSIREVLRNSGISVKELMEKEGLKGYAPLYGVPEPL

SNYLDAQYYGEISIGTPAQTFKVVFDTGSSNLWVPSKKCPISNIACDLHNKYDSSKSST

YKANGTKFEIRYGSGSMEGFLSTDVVAVASVAVKDQTFAEALKEPGVAFVAAKFDGILG

MAYETISVDRVTPVFYNMVGQKLVSNPVFSFYLNRVPGATPGGELILGGSDPKYYQGNF

TYVPVTKQGYWQFKMDGVNVNGESSFCKGGCQAIADTGTSLIAGPTSEITKLNEMIGAK

PIISGEYTIDCSKIDSLPPIDFVLAGKKFTLSGKQYVLKVSAMGQTQCVSGFLGLDVPS

GPLWILGDVFIGPYYTEFDMGQNRVGFAPAV*

>TRINITY_DN43959_c0_g1_TRINITY_DN43959_c0_g1_i1_g.68198

GESVSASVGESIETVPETTITVHCAASGFPTPTITWTKDGRLLSQDERISISNNGSLSIS

KALASDSGEYSCIARNRFGENTMTSTIRVVEVAPPSISAPEKPETVTSYGGESVPASIG

DSIETVAETTITVHCAASGFPEPSITWLKDGQLITQSERVAVFSNGSLSISEAATSDSG

EYSCIARNRFGENTMTSTIRVVEVVTPSISAPEKPETVTSYGGESVSASIGDSIETVEE

TAITVHCAVSGFPEPSITWQKDGQAIVGDARHAISSNGSLSIFKALPSDSGEYSCVATN

RFGVDTRTSTINVAEIETPSISLPTEPEPVKSYDNQPVVTDVGGSVVTLPNTNITLECE

ASGVPKPRVTWLKDGQPIRESPRVEVSESSLQIFNALSSNTGEYSCVARSRFGKTVVNS

TISVVALQSPEIATPDQSRIVQSYDGKQVGATIGDSIQTLADSTVTIQCPVSGVPPPNI

TWLRNGRPISGRARLQVSNNGSLTIVKARSSDSGQYTCVARNRLGEDRVTSSVFTIDPQ

EPGIFSLERPRSLKSHDGQDVIATVSDSVEMAAGTNLTITCEATGVPKPTIIWFKDNKP

IPEEMRITVSNKGSLTISQSLVSDSGEYTCVARNLVGESKMASMVTVLGIQKPSISVPK

NPKQHESYDSKPVTATIGDAIITLTGTPIAIRCVASGSPK

>TRINITY_DN4465_c0_g1_TRINITY_DN4465_c0_g1_i1_g.119354

MMVAPLVLLLSCLLLSFEASAAEHPAKKRSHVDEANGIPFQLTGYGKWNTGGGRSSMDIH

IEIPMDLPTSQPPTSGVTGSTGSAGSASSSSPSTSPTPSTSSSASPGSEGSFSAEEQEG

LNAHNKFRAVHGSPAMTLNRKMCDEAAAYAQKIAASGNMKHSSREERNGQGENLAMGCS

TNKAQTMTEAVTNWYNEVCDPGYNFQGGRGQSGTGHFTQVVWKDSLQLGIGRAEVTENG

MKCAYIVGRYEPLGNFDTGNNDYAKNVQQGSLNKNQYCSSVRDQENRRKGAKLRHIALF

DKHVSRVVKRANRPKHSQ*

>TRINITY_DN4565_c0_g1_TRINITY_DN4565_c0_g1_i1_g.24674

SNTGGSFSCACNAGSTGDGVTCAALRTTEPPTTPDVDECEAGTAECGENADCINTVGSYR

CQCRSGFTGDGKSCTDIDECALSLDTCNGNAECRNNEGSYVCVCMEGYVGDGTECREKT

PDIGATSGMRMKYINEYLAIGCGPENMMVVVSKSMLDGLGRTDISLIDPRCLPSDNGTH

YILQTNLTSCGTMAKTTEDAIVYTNCVEERPDPEAMISRLPDVSIPFRCYYAREGFTSA

KQMNMSRKRIRGKAADKGEFSLDLGVFKDEDFTDPYGDQDFPIGVSVSTRVYMQLKVSS

ADQNLAILAQHCYATPDSSPNNTLRYDLIRTGCPVDRTVQYHQVPKSGIQRFSMKAFQF

VNQDPFVYIHCAVIVCNATDSDSQCNRKCDQETVGRHRRAATYSSPVHSDDLVQGPLLR

LRREKSQASTSSSSPAMYLVVVLAVASVGIFAGLMALLRKKFGARQQATAAPAPAAV*

>TRINITY_DN4625_c0_g1_TRINITY_DN4625_c0_g1_i1_g.99150

QRLPLQALEVFQLDRIILGHVTHFSSHSCVSTMEVLKLLLLPLLLCTLVKGEEEKLKIEV

LEEAKECDRKTKDGDYLSMHYTGVLASNGKKFDSSRDRNDPFEFALGRGQVIQGWDQGL

KDMCVGERRKLTIPPHLGYGDHGAGSDIPPKATLIFDVELLEIKDSPPEGEGIQEPSNV

FAEIDKDGNKELTHEEIKNFLTNQEGFPNDDASSHDNIVNEIFQQEDKDKDGVISFEEF

SGPKHEEL*

>TRINITY_DN4640_c0_g1_TRINITY_DN4640_c0_g1_i1_g.99431

MRVNLVLLSCLLLIFAGSAFGKEIQRRQEEQTIEAFRNEYQDTLDESDVDKRSKVHVPPE

VIKFLDENVKKVGKQTEGTTWRQFASVWAIPDAPNPYKYIPSADGKGVDPVINKKNTYS

PDKTDGQTYIVARPENTHIHSERIIYEQIQNGALTTLKYPPAMGVMYSYNTPCEDCQKN

YLLPVLKALQDQAEWKPMPFYLAWTKKYPRDKPQSYFDDLAKKWKKKGIIFFQHVV*

>TRINITY_DN4669_c5_g2_TRINITY_DN4669_c5_g2_i7_g.99076

GDGDDDGADIVGNRRVSQANMKVWCLALLLLAVYAKAVPLPEEDEASSEEWNDEDYRPHH

HHHHHHKRVRIEKVPVKVPVYRTRHVKVPVIRKVPHYVRVPVKVPKHVYHTKHVKVPVY

QKVPVYIKYPVKVPVHRTKYGRVPVVKTINVPVHIPVNKTRYVPQNKEVPVPIYHTRHV

KIPVPVHHTKVVRVPVKVPEYIQKNRIVKVPVVRKVPVPVPVHHVKTVNVPEVKVVRVP

VKVPVPRYIHVHHKGHHGHHGHHGHHGHHGYHGHRGYHGHGGHHGNKYY*

>TRINITY_DN47460_c0_g1_TRINITY_DN47460_c0_g1_i1_g.46692

QAQCAVEDRSNLCRQDRVRAIAWSAADRTPVFLPECLEDGSFKPVQCDRASTECWCVDKS

GNELRGTRTDGQPTCTTTVGKTTCQWLAETTDSNPSCDKDGGYAPVQCISVSGDLQYCF

CVDRLGREIPRTRVYHDQIVCDASGQYCCCSRR*

>TRINITY_DN47849_c2_g1_TRINITY_DN47849_c2_g1_i1_g.74739

MGHSQGFVSLVACLLGLFLLGCTNSQRILPDWPKIGDRITQPFLDQLMVSQLLEQNLTLG

FFLKGLNGPPGPPGPPGPPGEPGSPGIAGPPGPSGHVGEDGAPGASGAPGPPGPPGPPG

LPGERGDPGEQGAPGAAGLPGAPGLPGSQGPMGPPGPEPIMPNFTVICEGEKGWLQCKQ

YELIKVTRAFWGRDDHVTCPKVPAGLSTDRLCEAMADNTMQKVNGQCKNEQACEVVASN

IFFDDNTCGNVYKYLKVWYECIPDEANAVDVLKDGKKRRRKRKRATKEKRSSKE*

>TRINITY_DN5014_c0_g1_TRINITY_DN5014_c0_g1_i1_g.109029

MNYKLVICLVVCFVMIQGGYSKARKRTTSCEIPQEVRGNWRAPDFETKKGKLRLTIEIGA

SSAKLQRKLGDDESSVEFECTAGKDGFFLTKSQVPEGFNDLTGEIKSLYKLHQFTCFNF

DKINDFLKVNMYSFEENPESKDASQACSEMGTKETLNTIGFSPADQFNDNPAKEE*

>TRINITY_DN5232_c0_g1_TRINITY_DN5232_c0_g1_i1_g.42288

QLFGRVLFVRDDHFSSAFWILCCCCSSLLEIKMESIKKKMAMLKQQLDDATKGADEAEAK

LKEAEARAVTAENEVGMLTKELQRVEDELDAAESRLAATNEELIEAEKQADESERVRKG

LEDRGASDVERLQALRRQLESARSRAEEAEAQYEEVSSKLNVLENDLDEAETKADDAET

RVKILEEEVTTVGNNLRSLEITEGKASEREENYEVKISDLKSKLEDATIRADDAENRVK

ELEREVEDLEAKRDDAKKDYENVKDELEKTLQELHEM*

>TRINITY_DN6006_c0_g1_TRINITY_DN6006_c0_g1_i1_g.14625

MANVRLFALCVFSILEVSSGLFLGGDETDSLGGNKPSQLGFERNQDVYSHLVIPPWSRPF

KIGYCKSWEWSTDKRYREARMKICEEYGKGKHECESPSGCHDKCPYVNGSYPFWRLRNA

ADVPFLWVISGLKFYETSSSSKALVTDPAKAYASSYFGPGYKPSNAFDNNRDTIWVSNG

AAPPGMQWIGFEFPWPVYVGSIHLMSEEDKPERNPSMIYVEASCEKYFRNFVTQWIITN

PTHDSNKRFSVFNMAKFTNLGSTGRKGPTTVGMHYQGQDHDSQVTIKKGIQIWKVPATG

TYAIEAAGAAGGYDKFTTISKRGRGARVKGNFHLKRGDLVKILVGQEGGANMASGGAGG

GGGTFVVAEDNTALLVAGGGGGIDKFKGDSARCHGTTSQDGNPGYGGAQFRGGSNGKGA

EEGDNNYSGGGGGGFESDGRSNSNFGGSQGTGGEGGKSFYEGGVGGRSNQNDVEGGFGG

GGGPNGAGGGGGG

>TRINITY_DN6324_c0_g1_TRINITY_DN6324_c0_g1_i1_g.67217

SFHSVFFTARAKQRDRPQRHSTDILPDLKMQFVLVVLLVCIAASEARYASEKPYASQSIP

VPVKFITTQDEFLPGDKSAKYHAALCGGCQFDGLMARFSVNLKNTEWNDDKGDSISLTV

QDSTGKTIASNLLGKTPVPDFNFTYASKYGDLYFEMTTGSAPAFTYTLALSFDYKPVPG

GARPNCAQRWQMTAIEYAAMLKHREMTKANDLGELVPIFKTETRQTIETMELLHLRLDY

CFGPQPQYNITITTVADDRLSGFATYACVKTYVQQAGKCDTKTNFKDISGGAANFVLVH

LNGPMDYGSIEVIVRGDGRFAGNNFFTLAASAPRSP*

>TRINITY_DN6531_c1_g2_TRINITY_DN6531_c1_g2_i5_g.49305

GFVRAGRRSAAGRSASDFVFGGGAAAWPPFGGWRRVRTSKQRRHFVRCVECGDASYKSER

FVLPVFYATVCQVENPGAICQEAFIMSIRECFPMKKHRFPNSSKTPKRSPCDTRQQRRQ

TQAEQISSDIRASVQNSVTEQPGLEIMWDNQSPSPGTVLKFGKRKNGFVRAGRRSAAGR

SASDFVFGGGAAAWPPFGGWRRVRTSKQRRHFVRCVECGDASYKSERFVLPVFYATVCQ

VENPGAICQEAFIMSIRECFPMKKHRFPNSSKTPKRSPCDTRQQRRQTQAEQISSDIRA

SVQNSVTEQPGLEIMWDNQSPSPGTVLKFGKRKKKHGSDSSSGGEISDLVRKLADKSGA

TPEANPLLKFWMYEDIKDQQKEKGTRRRPMKQKSSVVLTPARRPRYISKQDGTVF*

>TRINITY_DN690_c0_g1_TRINITY_DN690_c0_g1_i3_g.35952

MSFLLWMCATVLVQYFNFATCEVQGSTEQLQNDVRNIQNEELDNFELPSDEQNDLQRSEK

LKTMSLAERRQFESDLYETFVGICNERNISPCHHTDIRFYAALIAKGDPECVVTCSKEQ

MLENKDQMPHGGRTIDLIASIQNYMKNLDGESSDDKKALTEMFNQGCAAVGSGTCAEKR

LFILPFIPAIIGLVKLAGIAAANYITAMSKSESTRYLNTVNSATRQVVKVAKVASKGSC

FSADSLVNIKKNNGDVVSRPLRSLNLGDLVESVDEQTGQRTFSKIYHIAHEQDDSRVQL

LRIEYNDRSNSTQSLGISDRHLMYVTKKGQSTTHAPLEEPIMAMEVEEGDTVWMMNEGR

LAPSKVTGVSTFFGAARHPLTENHHMIVDGLHASVHILNEQLYRKLSYPLRWTFWANPE

WNRSWLVQKLIRVVENGKEPFFANSPTELMEYWTGSAIPGFFSSPITAN*

>TRINITY_DN729_c0_g2_TRINITY_DN729_c0_g2_i1_g.109598

MPVFHTKTIESILEPVAQQVSQLVILHEEAEDGNAMPDLALPIQAVGAAVANLVQVGKET

ASKSTDKILKTEMPIAFTRVEESSVLLVEASKLLKKDPFSSVARKKLIDGSRGILSGTS

ALLLTFDEAEVRKILAYCKNVIDYLTVSEQVETLQDLTTFVKNLTPGLSSMAKMVEARE

KELTHQIHASILRKCIASVKNTVQPAISALKNYVKIPEIEPGVKGEGCAEAQANRSYFI

MKIMGDIHEIMRVLQLTTYDEDDSHDPLNDMKKAASLFDSKLGMAQEWLSSPTTSGGGF

GEMAARDCINQGRKLADASGEPDRSRIQKVCDDLDQLLGDLAHLRNHKQGTSPQAMALS

KKIAQGLTSLQDQMEKAIQHQEGSGTRRPNTTMVGKIEQAHTWLNNPAGDHSGLGQKAI

QECVQEGRKCAEKLSGPDRTDILRVCDELDQLTRELAELKRRGMGNSPQAHTLAAKIEG

KLEELNRKLQHAAIAQVAEDYMDTLSGLKNLEKAAKAPPGTPGRNENFEARAGEFEHQA

DQIASTAIQVANTGGKTNKMALDDIRQTADELKQLTPQVYHAAKLVLIYPENQTHGAHL

DSMKNEWKGKVEKLTDLVDSAIDPAQFISACEEAIGKDVEACEVAMEQENPQMVIAKTS

NIARRTKRIATIANEEANNTEDPAYAEQVLEAADGAGEAITPMVISAKSVATNTGDRNA

RRRLRDDLRKLQDSVGKVRVIVVGSAQAAPEEEDFPPPPPPDMTALNLEPQEEAPPRPP

PPSEVVPPRPPPPPEEIIDQKVQNVLEQPPEDNRMAMAAHNLHREALKWEAQGNDIIQA

VKKMAVLFAKMSKYMTDAEEGEPYSKKELIDLAKQIATESREVVKHARKVAEQCSDKRL

KQVMQQTIDRIPTVGTQLKIVATVKATMIGAQDPKADLEATETLVGCAENLMSAVRQTV

RETEAASVKLRSEAGQVLRWKKK*

>TRINITY_DN729_c0_g3_TRINITY_DN729_c0_g3_i2_g.109601

MASTEQKKQEGDETMQTSAEEEIPSCDEGGLESRKDDSHGEGNDGLSQEKATEVTGDQAE

VGDTSAAKLKRQSTMAATAKEGLEFLTRTPGADEPDDGVDAPSTIPPEASSKKPKMQRD

STIDVTTREGLEFLSRAPGDAVQDNGKDVPPADSAETNSKKPQLQRYSTIDVTTREGLE

FLSRAPPTAVQDDGPDASPAASPPETNSQKPKLQRDSTIDVTAREGKDYLERVGGVEED

EPAREKDSGVSKGTPERGSRSKLQRGSTIATTLREAEEFLNRTGGNGGEGNKNDKGKDA

ASPPRLRRDLTMKETAKVGGAFVGEKHLTGSRKQTQLLRESEQTETKRLTRASLKRAGT

MDVTAAEGKQFLKRKKK*

>TRINITY_DN7752_c0_g1_TRINITY_DN7752_c0_g1_i16_g.56138

MKTFIFLHLVLYALVTVDCTKKCKGKKQVARNCKEVIVAGKITSGVYSVDPDGQGAFHVY

CDQTTDGGGYAVIQRRKDGSVDFYRDWDDYLEGFGDLSGEFWLGLEKIHRLTNVDCGNE

LRVDLSDWNGNSAQAVYEGFRVAGAVDLYRMNLDAFVGGTAGDSLTNHKGMAFSTRDRD

HDKSGSNCAVTYKGAWWYNGCHQSNLNGQYKEGGAHSTYADGINWKTWKGYKYSAKTST

MRIKPL*

>TRINITY_DN863_c0_g1_TRINITY_DN863_c0_g1_i21_g.15550

MLEDFYRGSSSFTPSDALSKVGFQFLVKVVANPHSSCNAKPFLTSNSPRDGACVAIPSGQ

TYRATLEASHNDSSQSVSDIVIVAPLGMTKSTVTRTGTNPVGAGIWSAQVTWTPQRAQF

GQHILCFKAQDSSGQESSQRCVTLLAGSSAPSPVLSSRFPKASFLAPSRTYTWSIAFDS

KIARPSTPRYIRFKSSGGHTVHTIDTSSSPDVHIDNTTNTLRFTVSGALLNGYRSYHIL

MDRGVVEGTLGCSGSGPPSPGISSSSAWTFNLGCNEGFSLNAARTTCVDDDECATANGN

CSHTCSNTAGSYRCECPDSELILEADGKTCSAPGMTVTCESDSMHVTFTRQMLSGLDEQ

HLRLNDPSCTADGNSSHIWFLVPLQGCGTTHTDGTDTITYENKVTSRALHVGGVITRVR

EVEILFHCSYGRHKTLGFVSFRPNTRKLLVYEAGYGAFTFLFNMFHSSSFLRPYGDSDY

PVNVSLRQQLYFQLQVKCNDSDLVLFVDTCKATPSGNSRAKPEYVFIQSGCNDDSTLVY

NYNLQPVQRFNLEAFQFIASHPVVYIHCDVMVCHDSANFSRCDQGCLPGPSHGRKRRDV

ASQIGPSSAHYVISEGPFRLGTSGSHEKVVAMLDAPEQPLGSGGENSSALPIIIGLASV

AVLACLSVIIAFRKRKSDKQPYEPVPLDEGRPLVL*

>TRINITY_DN8817_c0_g1_TRINITY_DN8817_c0_g1_i9_g.83253

MRTGIASSMAAVVRRIVQTSKAPAAIGPYNQAVIVDKTMYVSGQLGLNPETMEFVSDDVA

EQTKQALTNMGHILEAGGSAFDKVVKTTVLVADINDYAKVNDVYTTFFTEKFPARAAFQ

VGNLPKLGKVEIEAVAIVGEVKDETELLGKL*

>TRINITY_DN992_c0_g1_TRINITY_DN992_c0_g1_i12_g.88122

MPLNNGAGFAFNYHYVCAPVAASKMTKLKAALFLIFLIFATGQPRDLRFSSDVLLPGHRS

DDLGGRVNRGLHIYEKEEYNRASRNRCDEKNVCVKTSSSSRVPGKPGCICHTIRGCTYD

EGECYYQSKYVVIIE*
