# Supplementary material for: Proteomic Profiling of Black Coral (Antipatharia) Skeleton Reveals Hundreds of Skeleton-Associated Proteins Across Two Taxa
Source: Frontiers journal article supplement (doi:10.3389/fmars.2022.904835), 2022-06-30
Supplement: Table_1.xlsx [file Table_1.xlsx]

## Sheet: Sheet1
Sample Name	Treatment	mg protein/g powder
Stichopathes Clean 2x 1x	HCl	4.97355
Antipathes Clean 1x	HCl	0.0306857
Stichopathes Clean 2x	HCl	2.31966
Antipathes Clean 2x	HCl	n/d
Stichopathes Clean 1x	GHCl	2.83118
Antipathes Clean 1x	GHCl	0.0941558
Stichopathes Clean 2x	GHCl	1.27765
Antipathes Clean 2x	GHCl	0.114637
Stichopathes Clean 1x	DTT	5.57905
Antipathes Clean 1x	DTT	6.94024
Stichopathes Clean 2x	DTT	6.91986
Antipathes Clean 2x	DTT	6.66856
Stichopathes Clean 1x	Chitinase	4.09818
Antipathes Clean 1x	Chitinase	0.265322
Stichopathes Clean 2x	Chitinase	1.28458
Antipathes Clean 2x	Chitinase	0.311054
