# Supplementary material for: Proteomic Profiling of Black Coral (Antipatharia) Skeleton Reveals Hundreds of Skeleton-Associated Proteins Across Two Taxa
Source: Frontiers journal article supplement (doi:10.3389/fmars.2022.904835), 2022-06-30
Supplement: Table_2.XLSX [file Table_2.XLSX]

## Sheet: Antipathes Cleaned Once
	Proteomics								Annotation											Fraction	Completeness		Amino Acid Composition																							Signal Peptide
Description	|Log Prob|	Best score	# of spectra	# of unique peptides	# of mod peptides	Coverage %	# AA's in protein	Short_Name	transcript_id	sprot_Top_BLASTX_hit	Annotation	sprot_Top_BLASTP_hit	Scleractinia.only_BLASTX	TmHMM	eggnog	Kegg	gene_ontology_BLASTX	gene_ontology_BLASTP	Combined GO	Unique to once cleaned fraction	Complete	Incomplete at C-terminus only	%Ala	%Cys	%Asp	%Glu	%Phe	%Gly	%His	%Ile	%Lys	%Leu	%Met	%Asn	%Pro	%Gln	%Arg	%Ser	%Thr	%Val	%Trp	%Tyr	Total%	%D+E	%WYF	Prediction	SP(Sec/SPI)	OTHER	CS Position
>TRINITY_DN10133_c2_g1_i1.p1 TRINITY_DN10133_c2_g1~~TRINITY_DN10133_c2_g1_i1.p1 ORF type:complete len:374 (+),score=61.28 TRINITY_DN10133_c2_g1_i1:138-1259(+)	2.97	421.9	3	3	0	6.43	373	TRINITY_DN10133_c2_g1_i1.p1	TRINITY_DN10133_c2_g1_i1	CUZD1_HUMAN^CUZD1_HUMAN^Q:231-1112,H:275-548^30.508%ID^E:7.24e-26^RecName: Full	CUB and zona pellucida-like domain-containing protein 1	CUZD1_HUMAN^CUZD1_HUMAN^Q:32-325,H:275-548^30.508%ID^E:8.55e-27^RecName: Full=CUB and zona pellucida-like domain-containing protein 1;^Eukaryota; Metazoa; Chordata; Craniata; Vertebrata; Euteleostomi; Mammalia; Eutheria; Euarchontoglires; Primates; Haplorrhini; Catarrhini; Hominidae; Homo	.	ExpAA=22.60^PredHel=1^Topology=o337-359i	ENOG410XQVR^scavenger receptor cysteine rich domain containing	KEGG:hsa:50624	GO:0016021^cellular_component^integral component of membrane`GO:0030658^cellular_component^transport vesicle membrane`GO:0042589^cellular_component^zymogen granule membrane`GO:0007049^biological_process^cell cycle`GO:0051301^biological_process^cell division`GO:0008283^biological_process^cell population proliferation`GO:0006931^biological_process^substrate-dependent cell migration, cell attachment…	GO:0016021^cellular_component^integral component of membrane`GO:0030658^cellular_component^transport vesicle membrane`GO:0042589^cellular_component^zymogen granule membrane`GO:0007049^biological_process^cell cycle`GO:0051301^biological_process^cell division`GO:0008283^biological_process^cell population proliferation`GO:0006931^biological_process^substrate-dependent cell migration, cell attachment…	GO:0030658;GO:0042589;GO:0007049;GO:0051301;GO:0008283;GO:0008283;GO:0006931;GO:0032023	Y	+	FALSE	5.63003	3.48525	6.70241	5.09383	4.82574	5.63003	2.14477	4.82574	4.02145	8.0429	1.87668	2.94906	5.09383	4.82574	5.89812	9.91957	6.43432	9.38338	0.80429	2.41287	100	11.7962	8.0429	SP(Sec/SPI)	0.990287	0.009713	CS pos: 23-24. STG-RD. Pr: 0.6489
>TRINITY_DN102095_c0_g1_i1.p1 TRINITY_DN102095_c0_g1~~TRINITY_DN102095_c0_g1_i1.p1 ORF type:complete len:151 (-),score=33.84 TRINITY_DN102095_c0_g1_i1:289-741(-)	5.41	642.8	3	2	0	12.67	150	TRINITY_DN102095_c0_g1_i1.p1	TRINITY_DN102095_c0_g1_i1	no blast hit	no blast hit	.	.	.	.	.	.	.		Y	+	FALSE	12	0	4	11.3333	0	6.66667	0.666667	0.666667	18	2	2	6.66667	9.33333	4	5.33333	8	2.66667	6.66667	0	0	100	15.3333	0	OTHER	0.00222	0.99778
>TRINITY_DN10301_c0_g1_i3.p1 TRINITY_DN10301_c0_g1~~TRINITY_DN10301_c0_g1_i3.p1 ORF type:5prime_partial len:498 (-),score=115.77 TRINITY_DN10301_c0_g1_i3:506-1999(-)	4.21	539.2	3	2	0	3.02	497	TRINITY_DN10301_c0_g1_i3.p1	TRINITY_DN10301_c0_g1_i3	VAT1_DANRE^VAT1_DANRE^Q:1987-872,H:8-408^50.374%ID^E:4.84e-130^RecName: Full	Synaptic vesicle membrane protein VAT-1 homolog	VAT1_DANRE^VAT1_DANRE^Q:41-376,H:70-408^55.162%ID^E:2.55e-133^RecName: Full=Synaptic vesicle membrane protein VAT-1 homolog;^Eukaryota; Metazoa; Chordata; Craniata; Vertebrata; Euteleostomi; Actinopterygii; Neopterygii; Teleostei; Ostariophysi; Cypriniformes; Cyprinidae; Danio	.	.	COG0604^alcohol dehydrogenase	.	GO:0048037^molecular_function^cofactor binding`GO:0016491^molecular_function^oxidoreductase activity`GO:0008270^molecular_function^zinc ion binding	GO:0048037^molecular_function^cofactor binding`GO:0016491^molecular_function^oxidoreductase activity`GO:0008270^molecular_function^zinc ion binding	GO:0016491;GO:0008270	Y	FALSE	FALSE	10.664	1.40845	6.03622	11.0664	2.61569	9.45674	1.81087	3.62173	8.65191	5.83501	3.82294	2.21328	7.04225	3.42052	2.61569	5.23139	4.82897	7.04225	0.402414	2.21328	100	17.1026	5.23139
>TRINITY_DN10484_c0_g1_i1.p1 TRINITY_DN10484_c0_g1~~TRINITY_DN10484_c0_g1_i1.p1 ORF type:5prime_partial len:210 (-),score=43.70 TRINITY_DN10484_c0_g1_i1:82-711(-)	9.14	564.3	5	5	1	22.97	209	TRINITY_DN10484_c0_g1_i1.p1	TRINITY_DN10484_c0_g1_i1	no blast hit	no blast hit	.	tr|A0A2B4RCT5|A0A2B4RCT5_STYPI^tr|A0A2B4RCT5|A0A2B4RCT5_STYPI^Q:266-3,H:238-325^68.182%ID^E:1.12e-36^.^.	.	.	.	.	.		Y	FALSE	FALSE	5.74163	3.34928	4.78469	7.6555	7.17703	6.2201	0.956938	4.78469	9.56938	7.17703	1.91388	4.78469	3.82775	3.82775	4.78469	9.56938	6.69856	4.30622	0.478469	2.39234	100	12.4402	10.0478
>TRINITY_DN10600_c0_g1_i2.p1 TRINITY_DN10600_c0_g1~~TRINITY_DN10600_c0_g1_i2.p1 ORF type:5prime_partial len:738 (-),score=39.78 TRINITY_DN10600_c0_g1_i2:107-2320(-)	1.57	352.6	4	2	0	2.58	737	TRINITY_DN10600_c0_g1_i2.p1	TRINITY_DN10600_c0_g1_i2	no blast hit	no blast hit	.	tr|A0A2B4SWQ7|A0A2B4SWQ7_STYPI^tr|A0A2B4SWQ7|A0A2B4SWQ7_STYPI^Q:1914-772,H:1-381^89.501%ID^E:0^.^.	.	.	.	.	.		Y	FALSE	FALSE	5.02035	2.57802	6.64858	5.69878	3.52782	5.56309	2.03528	3.93487	5.69878	7.86974	1.35685	4.07056	5.02035	3.39213	5.56309	8.81954	8.81954	8.00543	1.62822	4.74898	100	12.3474	9.90502
>TRINITY_DN108201_c0_g1_i1.p1 TRINITY_DN108201_c0_g1~~TRINITY_DN108201_c0_g1_i1.p1 ORF type:internal len:120 (+),score=20.41 TRINITY_DN108201_c0_g1_i1:2-358(+)	2.16	382	2	2	1	15.97	119	TRINITY_DN108201_c0_g1_i1.p1	TRINITY_DN108201_c0_g1_i1	no blast hit	no blast hit	.	.	.	.	.	.	.		Y	FALSE	FALSE	10.9244	0	8.40336	2.52101	1.68067	7.56303	0	5.04202	4.20168	10.084	0.840336	6.72269	5.04202	5.04202	5.88235	8.40336	5.04202	9.2437	0.840336	2.52101	100	10.9244	5.04202
>TRINITY_DN10840_c0_g1_i1.p1 TRINITY_DN10840_c0_g1~~TRINITY_DN10840_c0_g1_i1.p1 ORF type:5prime_partial len:493 (-),score=76.02 TRINITY_DN10840_c0_g1_i1:1063-2541(-)	4	418.6	3	2	0	5.28	492	TRINITY_DN10840_c0_g1_i1.p1	TRINITY_DN10840_c0_g1_i1	LMAN1_MOUSE^LMAN1_MOUSE^Q:2460-1168,H:51-483^45.309%ID^E:9.41e-111^RecName: Full	Protein ERGIC-53	LMAN1_MOUSE^LMAN1_MOUSE^Q:28-492,H:51-517^45.86%ID^E:1.08e-144^RecName: Full=Protein ERGIC-53;^Eukaryota; Metazoa; Chordata; Craniata; Vertebrata; Euteleostomi; Mammalia; Eutheria; Euarchontoglires; Glires; Rodentia; Myomorpha; Muroidea; Muridae; Murinae; Mus; Mus	.	ExpAA=33.71^PredHel=1^Topology=o458-480i	ENOG410ZFRX^lectin, mannose-binding 1	KEGG:mmu:70361`KO:K10080	GO:0062023^cellular_component^collagen-containing extracellular matrix`GO:0030134^cellular_component^COPII-coated ER to Golgi transport vesicle`GO:0005783^cellular_component^endoplasmic reticulum`GO:0005789^cellular_component^endoplasmic reticulum membrane`GO:0005793^cellular_component^endoplasmic reticulum-Golgi intermediate compartment`GO:0033116^cellular_component^endoplasmic reticulum-Golgi i…	GO:0062023^cellular_component^collagen-containing extracellular matrix`GO:0030134^cellular_component^COPII-coated ER to Golgi transport vesicle`GO:0005783^cellular_component^endoplasmic reticulum`GO:0005789^cellular_component^endoplasmic reticulum membrane`GO:0005793^cellular_component^endoplasmic reticulum-Golgi intermediate compartment`GO:0033116^cellular_component^endoplasmic reticulum-Golgi i…	GO:0030134;GO:0005783;GO:0005789;GO:0005793;GO:0033116;GO:0033116;GO:0005794;GO:0000139;GO:0044220;GO:0016021;GO:0043231;GO:0030017;GO:0042802;GO:0005537;GO:0046872;GO:0007029;GO:0006888;GO:0007030;GO:0010638;GO:0015031	Y	FALSE	FALSE	5.28455	0.813008	7.11382	6.50407	4.47154	8.13008	3.45528	4.06504	7.31707	7.72358	1.82927	4.6748	4.6748	5.69106	4.47154	5.89431	4.6748	8.13008	1.42276	3.65854	100	13.6179	9.55285
>TRINITY_DN11187_c0_g2_i3.p1 TRINITY_DN11187_c0_g2~~TRINITY_DN11187_c0_g2_i3.p1 ORF type:complete len:283 (-),score=20.30 TRINITY_DN11187_c0_g2_i3:137-985(-)	14.2	601.6	16	8	1	25.89	282	TRINITY_DN11187_c0_g2_i3.p1	TRINITY_DN11187_c0_g2_i3	no blast hit	no blast hit	.	.	.	.	.	.	.		Y	+	FALSE	4.96454	1.41844	5.31915	6.02837	3.90071	4.60993	1.41844	4.96454	8.15603	7.44681	1.77305	3.90071	7.44681	6.38298	3.90071	6.38298	6.73759	6.73759	2.48227	6.02837	100	11.3475	12.4113	OTHER	0.006741	0.993259
>TRINITY_DN11290_c0_g1_i1.p1 TRINITY_DN11290_c0_g1~~TRINITY_DN11290_c0_g1_i1.p1 ORF type:complete len:202 (+),score=26.67 TRINITY_DN11290_c0_g1_i1:116-721(+)	16.6	616.9	14	7	1	36.82	201	TRINITY_DN11290_c0_g1_i1.p1	TRINITY_DN11290_c0_g1_i1	no blast hit	no blast hit	.	.	.	.	.	.	.		Y	+	FALSE	8.45771	1.99005	2.98507	6.96517	5.47264	5.97015	1.99005	4.47761	8.95522	5.47264	0.995025	1.99005	6.46766	3.48259	1.49254	8.95522	7.9602	9.95025	0.995025	4.97512	100	9.95025	11.4428	SP(Sec/SPI)	0.998983	0.001017	CS pos: 17-18. ALS-QK. Pr: 0.8766
>TRINITY_DN12086_c0_g1_i2.p1 TRINITY_DN12086_c0_g1~~TRINITY_DN12086_c0_g1_i2.p1 ORF type:complete len:415 (+),score=56.84 TRINITY_DN12086_c0_g1_i2:81-1325(+)	0.92	370.1	49	2	2	1.93	414	TRINITY_DN12086_c0_g1_i2.p1	TRINITY_DN12086_c0_g1_i2	DCAF5_MOUSE^DCAF5_MOUSE^Q:144-1343,H:24-426^49.505%ID^E:7.93e-128^RecName: Full	DDB1- and CUL4-associated factor 5	DCAF5_MOUSE^DCAF5_MOUSE^Q:22-414,H:24-419^49.874%ID^E:5.06e-132^RecName: Full=DDB1- and CUL4-associated factor 5;^Eukaryota; Metazoa; Chordata; Craniata; Vertebrata; Euteleostomi; Mammalia; Eutheria; Euarchontoglires; Glires; Rodentia; Myomorpha; Muroidea; Muridae; Murinae; Mus; Mus	.	.	ENOG410ZPFW^ddb1 and cul4 associated factor 5	KEGG:mmu:320808`KO:K11800	GO:0080008^cellular_component^Cul4-RING E3 ubiquitin ligase complex`GO:0005739^cellular_component^mitochondrion`GO:0016567^biological_process^protein ubiquitination	GO:0080008^cellular_component^Cul4-RING E3 ubiquitin ligase complex`GO:0005739^cellular_component^mitochondrion`GO:0016567^biological_process^protein ubiquitination	GO:0005739;GO:0016567	Y	+	FALSE	6.03865	2.41546	6.76329	3.38164	5.07246	7.48792	4.10628	4.10628	3.1401	7.72947	1.69082	6.03865	5.7971	2.657	5.55556	6.76329	7.00483	8.9372	1.44928	3.86473	100	10.1449	10.3865	OTHER	0.003112	0.996888
>TRINITY_DN1399_c0_g1_i1.p1 TRINITY_DN1399_c0_g1~~TRINITY_DN1399_c0_g1_i1.p1 ORF type:complete len:243 (-),score=45.87 TRINITY_DN1399_c0_g1_i1:50-778(-)	5.18	436.7	5	3	0	7.85	242	TRINITY_DN1399_c0_g1_i1.p1	TRINITY_DN1399_c0_g1_i1	FCN2_PIG^FCN2_PIG^Q:721-53,H:105-323^53.125%ID^E:3.15e-72^RecName: Full	Ficolin-2	FCN2_PIG^FCN2_PIG^Q:20-242,H:105-323^53.125%ID^E:6.76e-73^RecName: Full=Ficolin-2;^Eukaryota; Metazoa; Chordata; Craniata; Vertebrata; Euteleostomi; Mammalia; Eutheria; Laurasiatheria; Artiodactyla; Suina; Suidae; Sus	tr|A0A3M6TNI6|A0A3M6TNI6_9CNID^tr|A0A3M6TNI6|A0A3M6TNI6_9CNID^Q:1234-1878,H:114-332^58.824%ID^E:1.39e-77^.^.	.	ENOG410ZYS4^fibrinogen	KEGG:ssc:396881`KO:K10104	GO:0005581^cellular_component^collagen trimer`GO:0005576^cellular_component^extracellular region`GO:0030246^molecular_function^carbohydrate binding`GO:0046872^molecular_function^metal ion binding`GO:0001867^biological_process^complement activation, lectin pathway	GO:0005581^cellular_component^collagen trimer`GO:0005576^cellular_component^extracellular region`GO:0030246^molecular_function^carbohydrate binding`GO:0046872^molecular_function^metal ion binding`GO:0001867^biological_process^complement activation, lectin pathway	GO:0005576;GO:0030246;GO:0046872;GO:0001867	Y	+	FALSE	7.02479	2.47934	7.85124	3.30579	3.71901	13.2231	2.47934	3.30579	6.61157	7.02479	1.65289	4.54545	1.23967	2.89256	4.95868	5.3719	5.3719	7.85124	3.30579	5.78512	100	11.157	12.8099	SP(Sec/SPI)	0.999677	0.000323	CS pos: 19-20. VDC-TE. Pr: 0.9240
>TRINITY_DN1434_c0_g1_i2.p1 TRINITY_DN1434_c0_g1~~TRINITY_DN1434_c0_g1_i2.p1 ORF type:5prime_partial len:450 (+),score=80.65 TRINITY_DN1434_c0_g1_i2:2-1351(+)	2.11	390	5	2	0	4.9	449	TRINITY_DN1434_c0_g1_i2.p1	TRINITY_DN1434_c0_g1_i2	FSTL4_HUMAN^FSTL4_HUMAN^Q:116-1255,H:453-839^23.039%ID^E:2.46e-22^RecName: Full	Follistatin-related protein 4	FSTL4_HUMAN^FSTL4_HUMAN^Q:27-418,H:447-839^23.095%ID^E:1.12e-22^RecName: Full=Follistatin-related protein 4;^Eukaryota; Metazoa; Chordata; Craniata; Vertebrata; Euteleostomi; Mammalia; Eutheria; Euarchontoglires; Primates; Haplorrhini; Catarrhini; Hominidae; Homo	.	.	ENOG410YBHC^Follistatin-like	KEGG:hsa:23105	GO:0005576^cellular_component^extracellular region`GO:0030141^cellular_component^secretory granule`GO:0048403^molecular_function^brain-derived neurotrophic factor binding`GO:0005509^molecular_function^calcium ion binding`GO:0030154^biological_process^cell differentiation`GO:0007275^biological_process^multicellular organism development`GO:0031549^biological_process^negative regulation of brain-der…	GO:0005576^cellular_component^extracellular region`GO:0030141^cellular_component^secretory granule`GO:0048403^molecular_function^brain-derived neurotrophic factor binding`GO:0005509^molecular_function^calcium ion binding`GO:0030154^biological_process^cell differentiation`GO:0007275^biological_process^multicellular organism development`GO:0031549^biological_process^negative regulation of brain-der…	GO:0030141;GO:0048403;GO:0005509;GO:0030154;GO:0007275;GO:0007275;GO:0031549;GO:0048671;GO:0061000;	Y	FALSE	FALSE	9.1314	0.890869	4.45434	4.45434	2.89532	8.46325	2.89532	6.01336	5.34521	9.57684	2.00445	4.89978	5.12249	2.44989	4.23163	6.4588	6.01336	8.90869	2.00445	3.78619	100	8.90869	8.68597
>TRINITY_DN1461_c2_g1_i1.p1 TRINITY_DN1461_c2_g1~~TRINITY_DN1461_c2_g1_i1.p1 ORF type:complete len:294 (+),score=57.44 TRINITY_DN1461_c2_g1_i1:50-931(+)	1.43	435.7	2	2	0	4.78	293	TRINITY_DN1461_c2_g1_i1.p1	TRINITY_DN1461_c2_g1_i1	RA1L2_HUMAN^RA1L2_HUMAN^Q:68-607,H:11-183^40.884%ID^E:1.71e-35^RecName: Full	Heterogeneous nuclear ribonucleoprotein A1-like 2	RA1L2_HUMAN^RA1L2_HUMAN^Q:7-186,H:11-183^40.884%ID^E:1.27e-38^RecName: Full=Heterogeneous nuclear ribonucleoprotein A1-like 2;^Eukaryota; Metazoa; Chordata; Craniata; Vertebrata; Euteleostomi; Mammalia; Eutheria; Euarchontoglires; Primates; Haplorrhini; Catarrhini; Hominidae; Homo	.	.	COG0724^Rna-binding protein	KEGG:hsa:144983`KO:K12741	GO:0005737^cellular_component^cytoplasm`GO:0005634^cellular_component^nucleus`GO:1990904^cellular_component^ribonucleoprotein complex`GO:0005681^cellular_component^spliceosomal complex`GO:0003729^molecular_function^mRNA binding`GO:0003723^molecular_function^RNA binding`GO:0006397^biological_process^mRNA processing`GO:0051028^biological_process^mRNA transport`GO:0008380^biological_process^RNA spli…	GO:0005737^cellular_component^cytoplasm`GO:0005634^cellular_component^nucleus`GO:1990904^cellular_component^ribonucleoprotein complex`GO:0005681^cellular_component^spliceosomal complex`GO:0003729^molecular_function^mRNA binding`GO:0003723^molecular_function^RNA binding`GO:0006397^biological_process^mRNA processing`GO:0051028^biological_process^mRNA transport`GO:0008380^biological_process^RNA spli…	GO:0005634;GO:1990904;GO:0005681;GO:0003729;GO:0003723;GO:0003723;GO:0006397;GO:0051028;GO:0008380;	Y	+	FALSE	5.80205	1.36519	8.19113	5.80205	2.73038	16.041	1.36519	2.38908	7.84983	4.09556	1.36519	2.04778	3.41297	3.41297	6.82594	7.84983	4.77816	7.16724	0.341297	7.16724	100	13.9932	10.2389	OTHER	0.001319	0.998681
>TRINITY_DN1469_c0_g1_i1.p1 TRINITY_DN1469_c0_g1~~TRINITY_DN1469_c0_g1_i1.p1 ORF type:5prime_partial len:2030 (+),score=690.28 TRINITY_DN1469_c0_g1_i1:2-6091(+)	2.53	541.2	3	2	0	0.69	2029	TRINITY_DN1469_c0_g1_i1.p1	TRINITY_DN1469_c0_g1_i1	no blast hit	no blast hit	.	.	.	.	.	.	.		Y	FALSE	FALSE	9.65993	0.394283	4.53425	13.6028	1.87284	5.42139	1.82356	3.79497	7.09709	10.3499	3.05569	3.20355	3.15426	5.96353	7.93494	6.20996	4.18926	6.25924	0.147856	1.3307	100	18.137	3.3514
>TRINITY_DN1491_c0_g1_i1.p1 TRINITY_DN1491_c0_g1~~TRINITY_DN1491_c0_g1_i1.p1 ORF type:5prime_partial len:415 (+),score=46.57 TRINITY_DN1491_c0_g1_i1:1-1245(+)	12.74	695.4	6	2	0	6.52	414	TRINITY_DN1491_c0_g1_i1.p1	TRINITY_DN1491_c0_g1_i1	ZPP_ACRMI^ZPP_ACRMI^Q:175-918,H:67-320^37.109%ID^E:8.13e-43^RecName: Full	ZP domain-containing protein {ECO:0000303|PubMed:23765379}	ZPP_ACRMI^ZPP_ACRMI^Q:59-306,H:67-320^37.109%ID^E:1.1e-49^RecName: Full=ZP domain-containing protein {ECO:0000303|PubMed:23765379};^Eukaryota; Metazoa; Cnidaria; Anthozoa; Hexacorallia; Scleractinia; Astrocoeniina; Acroporidae; Acropora	tr|A0A3M6UWN0|A0A3M6UWN0_9CNID^tr|A0A3M6UWN0|A0A3M6UWN0_9CNID^Q:444-196,H:1-82^80.723%ID^E:6.64e-28^.^.	ExpAA=22.82^PredHel=1^Topology=o368-390i	.	.	GO:0016021^cellular_component^integral component of membrane	GO:0016021^cellular_component^integral component of membrane		Y	FALSE	FALSE	6.28019	4.83092	5.7971	4.58937	4.58937	5.55556	3.1401	3.86473	3.62319	7.72947	1.44928	4.34783	5.31401	2.89855	7.24638	10.3865	6.28019	8.45411	0.241546	3.38164	100	10.3865	8.21256
>TRINITY_DN1513_c0_g1_i5.p1 TRINITY_DN1513_c0_g1~~TRINITY_DN1513_c0_g1_i5.p1 ORF type:complete len:1139 (-),score=282.97 TRINITY_DN1513_c0_g1_i5:51-2963(-)	16.66	527.2	15	12	0	11.96	970	TRINITY_DN1513_c0_g1_i5.p1	TRINITY_DN1513_c0_g1_i5	FP_ACRMI^FP_ACRMI^Q:3440-54,H:147-1280^44.01%ID^E:0^RecName: Full	Fibronectin type III domain-containing protein	FP_ACRMI^FP_ACRMI^Q:10-1138,H:147-1280^44.01%ID^E:0^RecName: Full=Fibronectin type III domain-containing protein;^Eukaryota; Metazoa; Cnidaria; Anthozoa; Hexacorallia; Scleractinia; Astrocoeniina; Acroporidae; Acropora	.	ExpAA=22.78^PredHel=1^Topology=o1014-1036i	.	.	GO:0016021^cellular_component^integral component of membrane	GO:0016021^cellular_component^integral component of membrane		Y	+	FALSE	6.59794	1.03093	6.49485	6.70103	3.40206	7.52577	0.721649	4.63918	6.90722	6.70103	0.515464	4.63918	7.01031	3.29897	5.7732	6.18557	7.73196	8.35052	1.75258	4.02062	100	13.1959	9.17526	OTHER	0.002807	0.997193
>TRINITY_DN15370_c0_g1_i3.p1 TRINITY_DN15370_c0_g1~~TRINITY_DN15370_c0_g1_i3.p1 ORF type:5prime_partial len:397 (-),score=113.17 TRINITY_DN15370_c0_g1_i3:292-1482(-)	1.9	526.3	3	2	0	4.04	396	TRINITY_DN15370_c0_g1_i3.p1	TRINITY_DN15370_c0_g1_i3	CDC37_HUMAN^CDC37_HUMAN^Q:1437-313,H:1-372^51.842%ID^E:2.79e-109^RecName: Full	Hsp90 co-chaperone Cdc37	CDC37_CHICK^CDC37_CHICK^Q:16-359,H:1-350^53.258%ID^E:4.26e-132^RecName: Full=Hsp90 co-chaperone Cdc37;^Eukaryota; Metazoa; Chordata; Craniata; Vertebrata; Euteleostomi; Archelosauria; Archosauria; Dinosauria; Saurischia; Theropoda; Coelurosauria; Aves; Neognathae; Galloanserae; Galliformes; Phasianidae; Phasianinae; Gallus	.	.	ENOG410XTCZ^cell division cycle 37 homolog (S	KEGG:gga:395430`KO:K09554	GO:0101031^cellular_component^chaperone complex`GO:0005737^cellular_component^cytoplasm`GO:0005829^cellular_component^cytosol`GO:0070062^cellular_component^extracellular exosome`GO:1990565^cellular_component^HSP90-CDC37 chaperone complex`GO:0051087^molecular_function^chaperone binding`GO:0031072^molecular_function^heat shock protein binding`GO:0051879^molecular_function^Hsp90 protein binding`GO:0…	GO:0005737^cellular_component^cytoplasm`GO:0051087^molecular_function^chaperone binding`GO:0031072^molecular_function^heat shock protein binding`GO:0019901^molecular_function^protein kinase binding`GO:0051082^molecular_function^unfolded protein binding`GO:0006457^biological_process^protein folding`GO:0050821^biological_process^protein stabilization	GO:0051087;GO:0031072;GO:0019901;GO:0051082;GO:0006457;GO:0006457;GO:0050821;	Y	FALSE	FALSE	8.33333	1.26263	8.08081	13.8889	2.52525	2.77778	3.28283	4.29293	9.59596	7.82828	3.78788	3.0303	3.28283	5.05051	5.80808	4.79798	4.0404	5.05051	1.26263	2.0202	100	21.9697	5.80808
>TRINITY_DN15419_c0_g1_i13.p1 TRINITY_DN15419_c0_g1~~TRINITY_DN15419_c0_g1_i13.p1 ORF type:internal len:294 (-),score=48.65 TRINITY_DN15419_c0_g1_i13:3-881(-)	26.06	648.4	14	8	3	29.35	293	TRINITY_DN15419_c0_g1_i13.p1	TRINITY_DN15419_c0_g1_i13	HMCN2_MOUSE^HMCN2_MOUSE^Q:881-78,H:4129-4380^31.502%ID^E:2.67e-24^RecName: Full	Hemicentin-2	HMCN2_MOUSE^HMCN2_MOUSE^Q:1-268,H:4129-4380^31.387%ID^E:5.56e-26^RecName: Full=Hemicentin-2;^Eukaryota; Metazoa; Chordata; Craniata; Vertebrata; Euteleostomi; Mammalia; Eutheria; Euarchontoglires; Glires; Rodentia; Myomorpha; Muroidea; Muridae; Murinae; Mus; Mus	.	.	ENOG410ZN3C^von Willebrand factor A domain containing 7	.	GO:0005604^cellular_component^basement membrane`GO:0005938^cellular_component^cell cortex`GO:0030054^cellular_component^cell junction`GO:0032154^cellular_component^cleavage furrow`GO:0062023^cellular_component^collagen-containing extracellular matrix`GO:0031012^cellular_component^extracellular matrix`GO:0005576^cellular_component^extracellular region`GO:0005615^cellular_component^extracellular sp…	GO:0005604^cellular_component^basement membrane`GO:0005938^cellular_component^cell cortex`GO:0030054^cellular_component^cell junction`GO:0032154^cellular_component^cleavage furrow`GO:0062023^cellular_component^collagen-containing extracellular matrix`GO:0031012^cellular_component^extracellular matrix`GO:0005576^cellular_component^extracellular region`GO:0005615^cellular_component^extracellular sp…	GO:0005938;GO:0030054;GO:0032154;GO:0062023;GO:0031012;GO:0031012;GO:0005576;GO:0005615;GO:0005509;GO:0050896	Y	FALSE	FALSE	7.50853	2.04778	7.16724	7.50853	0.682594	11.2628	0	7.84983	4.43686	5.46075	1.70648	4.09556	6.14334	3.41297	2.38908	8.53242	7.50853	9.55631	1.02389	1.70648	100	14.6758	3.41297
>TRINITY_DN15430_c0_g1_i1.p1 TRINITY_DN15430_c0_g1~~TRINITY_DN15430_c0_g1_i1.p1 ORF type:complete len:249 (-),score=35.32 TRINITY_DN15430_c0_g1_i1:204-950(-)	12.29	537.9	4	3	0	13.71	248	TRINITY_DN15430_c0_g1_i1.p1	TRINITY_DN15430_c0_g1_i1	TPIS_PONAB^TPIS_PONAB^Q:953-210,H:2-248^70.161%ID^E:4.34e-113^RecName: Full	Triosephosphate isomerase	TPIS_PONAB^TPIS_PONAB^Q:3-247,H:5-248^70.612%ID^E:4.48e-124^RecName: Full=Triosephosphate isomerase;^Eukaryota; Metazoa; Chordata; Craniata; Vertebrata; Euteleostomi; Mammalia; Eutheria; Euarchontoglires; Primates; Haplorrhini; Catarrhini; Hominidae; Pongo	tr|A0A2B4S7F8|A0A2B4S7F8_STYPI^tr|A0A2B4S7F8|A0A2B4S7F8_STYPI^Q:98-193,H:1-32^100%ID^E:3.19e-17^.^.	.	COG0149^triosephosphate isomerase	KEGG:pon:100172948`KO:K01803	GO:0005737^cellular_component^cytoplasm`GO:0008929^molecular_function^methylglyoxal synthase activity`GO:0042803^molecular_function^protein homodimerization activity`GO:0004807^molecular_function^triose-phosphate isomerase activity`GO:0006094^biological_process^gluconeogenesis`GO:0046166^biological_process^glyceraldehyde-3-phosphate biosynthetic process`GO:0006096^biological_process^glycolytic pr…	GO:0005737^cellular_component^cytoplasm`GO:0008929^molecular_function^methylglyoxal synthase activity`GO:0042803^molecular_function^protein homodimerization activity`GO:0004807^molecular_function^triose-phosphate isomerase activity`GO:0006094^biological_process^gluconeogenesis`GO:0046166^biological_process^glyceraldehyde-3-phosphate biosynthetic process`GO:0006096^biological_process^glycolytic pr…	GO:0008929;GO:0042803;GO:0004807;GO:0006094;GO:0046166;GO:0046166;GO:0006096;GO:0019242	Y	+	FALSE	9.27419	2.41935	4.83871	7.66129	2.82258	10.0806	1.6129	6.85484	7.66129	6.85484	1.6129	4.43548	3.22581	2.82258	4.03226	6.04839	3.62903	9.67742	2.01613	2.41935	100	12.5	7.25806	OTHER	0.00212	0.99788
>TRINITY_DN1563_c0_g1_i2.p1 TRINITY_DN1563_c0_g1~~TRINITY_DN1563_c0_g1_i2.p1 ORF type:5prime_partial len:453 (+),score=52.13 TRINITY_DN1563_c0_g1_i2:1-1359(+)	1.05	431.7	4	2	0	3.98	452	TRINITY_DN1563_c0_g1_i2.p1	TRINITY_DN1563_c0_g1_i2	CCNF_XENLA^CCNF_XENLA^Q:46-1113,H:194-546^33.148%ID^E:2.56e-53^RecName: Full	Cyclin-F	CCNF_XENLA^CCNF_XENLA^Q:16-371,H:194-546^33.148%ID^E:1.57e-54^RecName: Full=Cyclin-F;^Eukaryota; Metazoa; Chordata; Craniata; Vertebrata; Euteleostomi; Amphibia; Batrachia; Anura; Pipoidea; Pipidae; Xenopodinae; Xenopus; Xenopus	.	.	.	KEGG:xla:379591`KO:K10289	GO:0005814^cellular_component^centriole`GO:0005737^cellular_component^cytoplasm`GO:0005634^cellular_component^nucleus`GO:0019005^cellular_component^SCF ubiquitin ligase complex`GO:0007049^biological_process^cell cycle`GO:0051301^biological_process^cell division`GO:0010826^biological_process^negative regulation of centrosome duplication`GO:0016567^biological_process^protein ubiquitination`GO:00311…	GO:0005814^cellular_component^centriole`GO:0005737^cellular_component^cytoplasm`GO:0005634^cellular_component^nucleus`GO:0019005^cellular_component^SCF ubiquitin ligase complex`GO:0007049^biological_process^cell cycle`GO:0051301^biological_process^cell division`GO:0010826^biological_process^negative regulation of centrosome duplication`GO:0016567^biological_process^protein ubiquitination`GO:00311…	GO:0005737;GO:0005634;GO:0019005;GO:0007049;GO:0051301;GO:0051301;GO:0010826;GO:0016567;GO:0031146;	Y	FALSE	FALSE	7.74336	2.87611	6.41593	9.0708	5.0885	3.9823	1.54867	5.30973	4.42478	10.6195	2.43363	3.53982	2.21239	6.19469	4.64602	9.51327	3.9823	5.97345	1.32743	3.09735	100	15.4867	9.51327
>TRINITY_DN1685_c0_g1_i1.p1 TRINITY_DN1685_c0_g1~~TRINITY_DN1685_c0_g1_i1.p1 ORF type:3prime_partial len:520 (+),score=149.43 TRINITY_DN1685_c0_g1_i1:146-1702(+)	7.15	485.4	2	2	0	3.28	519	TRINITY_DN1685_c0_g1_i1.p1	TRINITY_DN1685_c0_g1_i1	no blast hit	no blast hit	.	tr|A0A2B4RJC9|A0A2B4RJC9_STYPI^tr|A0A2B4RJC9|A0A2B4RJC9_STYPI^Q:1078-926,H:1-51^88.235%ID^E:3.03e-24^.^.	.	.	.	.	.		Y	FALSE	+	5.97303	0.385356	8.8632	21.3873	1.15607	8.09249	1.92678	3.66089	7.70713	2.89017	1.34875	3.08285	6.93642	2.6975	4.62428	10.2119	4.23892	3.85356	0.192678	0.770713	100	30.2505	2.11946
>TRINITY_DN1689_c0_g2_i1.p1 TRINITY_DN1689_c0_g2~~TRINITY_DN1689_c0_g2_i1.p1 ORF type:complete len:383 (-),score=43.29 TRINITY_DN1689_c0_g2_i1:490-1638(-)	9.87	559.8	5	4	1	13.87	382	TRINITY_DN1689_c0_g2_i1.p1	TRINITY_DN1689_c0_g2_i1	no blast hit	no blast hit	.	.	.	.	.	.	.		Y	+	FALSE	3.66492	4.18848	6.5445	8.11518	1.83246	2.35602	4.18848	2.6178	8.37696	2.6178	1.04712	2.09424	18.8482	11.5183	3.9267	4.45026	6.80628	3.40314	1.04712	2.35602	100	14.6597	5.2356	SP(Sec/SPI)	0.95716	0.04284	CS pos: 16-17. AIA-KH. Pr: 0.7827
>TRINITY_DN1712_c0_g1_i1.p1 TRINITY_DN1712_c0_g1~~TRINITY_DN1712_c0_g1_i1.p1 ORF type:complete len:384 (-),score=70.03 TRINITY_DN1712_c0_g1_i1:493-1491(-)	7.73	613.9	2	2	0	6.02	332	TRINITY_DN1712_c0_g1_i1.p1	TRINITY_DN1712_c0_g1_i1	NSF1C_CHICK^NSF1C_CHICK^Q:1617-499,H:2-368^48.533%ID^E:2.93e-101^RecName: Full	NSFL1 cofactor p47	NSF1C_CHICK^NSF1C_CHICK^Q:10-382,H:2-368^49.333%ID^E:2.09e-107^RecName: Full=NSFL1 cofactor p47;^Eukaryota; Metazoa; Chordata; Craniata; Vertebrata; Euteleostomi; Archelosauria; Archosauria; Dinosauria; Saurischia; Theropoda; Coelurosauria; Aves; Neognathae; Galloanserae; Galliformes; Phasianidae; Phasianinae; Gallus	tr|A0A2B4SPL5|A0A2B4SPL5_STYPI^tr|A0A2B4SPL5|A0A2B4SPL5_STYPI^Q:2166-1180,H:70-398^83.283%ID^E:0^.^.	.	ENOG410YGXU^UBX domain protein	KEGG:gga:419268`KO:K14012	GO:0005829^cellular_component^cytosol`GO:0005795^cellular_component^Golgi stack`GO:0005815^cellular_component^microtubule organizing center`GO:0005634^cellular_component^nucleus`GO:0008289^molecular_function^lipid binding`GO:0043130^molecular_function^ubiquitin binding`GO:0000045^biological_process^autophagosome assembly`GO:0007030^biological_process^Golgi organization`GO:0061025^biological_proce…	GO:0005829^cellular_component^cytosol`GO:0005795^cellular_component^Golgi stack`GO:0005815^cellular_component^microtubule organizing center`GO:0005634^cellular_component^nucleus`GO:0008289^molecular_function^lipid binding`GO:0043130^molecular_function^ubiquitin binding`GO:0000045^biological_process^autophagosome assembly`GO:0007030^biological_process^Golgi organization`GO:0061025^biological_proce…	GO:0005795;GO:0005815;GO:0005634;GO:0008289;GO:0043130;GO:0043130;GO:0000045;GO:0007030;GO:0061025;GO:0031468;GO:0043161;	Y	+	FALSE	9.33735	0	6.62651	7.83133	3.91566	9.33735	3.01205	2.40964	4.81928	5.72289	1.80723	3.61446	8.13253	4.81928	6.92771	8.13253	5.72289	6.62651	0.301205	0.903614	100	14.4578	5.12048	OTHER	0.001083	0.998917
>TRINITY_DN17295_c1_g1_i1.p1 TRINITY_DN17295_c1_g1~~TRINITY_DN17295_c1_g1_i1.p1 ORF type:complete len:343 (-),score=102.57 TRINITY_DN17295_c1_g1_i1:259-1287(-)	8.85	659.4	4	4	0	12.57	342	TRINITY_DN17295_c1_g1_i1.p1	TRINITY_DN17295_c1_g1_i1	CALU_XENLA^CALU_XENLA^Q:1266-262,H:6-315^41.471%ID^E:4.2e-62^RecName: Full	Calumenin	CALUA_SALSA^CALUA_SALSA^Q:8-342,H:6-315^41.471%ID^E:1.68e-77^RecName: Full=Calumenin-A;^Eukaryota; Metazoa; Chordata; Craniata; Vertebrata; Euteleostomi; Actinopterygii; Neopterygii; Teleostei; Protacanthopterygii; Salmoniformes; Salmonidae; Salmoninae; Salmo	.	.	.	KEGG:sasa:106576025	GO:0005789^cellular_component^endoplasmic reticulum membrane`GO:0005576^cellular_component^extracellular region`GO:0005794^cellular_component^Golgi apparatus`GO:0042470^cellular_component^melanosome`GO:0033018^cellular_component^sarcoplasmic reticulum lumen`GO:0005509^molecular_function^calcium ion binding	GO:0005789^cellular_component^endoplasmic reticulum membrane`GO:0005576^cellular_component^extracellular region`GO:0005794^cellular_component^Golgi apparatus`GO:0042470^cellular_component^melanosome`GO:0033018^cellular_component^sarcoplasmic reticulum lumen`GO:0005509^molecular_function^calcium ion binding	GO:0005576;GO:0005794;GO:0042470;GO:0033018;GO:0005509;GO:0005509	Y	+	FALSE	4.97076	0.584795	14.0351	14.9123	4.67836	5.55556	3.80117	3.80117	10.5263	7.60234	2.33918	3.21637	2.33918	0.877193	3.21637	5.26316	3.50877	5.84795	1.16959	1.75439	100	28.9474	7.60234	SP(Sec/SPI)	0.995871	0.004129	CS pos: 23-24. SLA-DK. Pr: 0.4842
>TRINITY_DN17515_c0_g2_i2.p1 TRINITY_DN17515_c0_g2~~TRINITY_DN17515_c0_g2_i2.p1 ORF type:5prime_partial len:693 (-),score=98.84 TRINITY_DN17515_c0_g2_i2:353-2431(-)	1.66	399.5	2	2	0	1.59	692	TRINITY_DN17515_c0_g2_i2.p1	TRINITY_DN17515_c0_g2_i2	LOX5_RAT^LOX5_RAT^Q:1789-656,H:220-571^28.982%ID^E:5.38e-40^RecName: Full	Arachidonate 5-lipoxygenase	LOX5_RAT^LOX5_RAT^Q:208-585,H:220-571^28.982%ID^E:1.77e-40^RecName: Full=Arachidonate 5-lipoxygenase;^Eukaryota; Metazoa; Chordata; Craniata; Vertebrata; Euteleostomi; Mammalia; Eutheria; Euarchontoglires; Glires; Rodentia; Myomorpha; Muroidea; Muridae; Murinae; Rattus	.	.	ENOG410YN4N^Plant lipoxygenase may be involved in a number of diverse aspects of plant physiology including growth and development, pest resistance, and senescence or responses to wounding (By similarity)	KEGG:rno:25290`KO:K00461	GO:0005737^cellular_component^cytoplasm`GO:0005829^cellular_component^cytosol`GO:0030425^cellular_component^dendrite`GO:0005635^cellular_component^nuclear envelope`GO:0005641^cellular_component^nuclear envelope lumen`GO:0016363^cellular_component^nuclear matrix`GO:0031965^cellular_component^nuclear membrane`GO:0005634^cellular_component^nucleus`GO:0042383^cellular_component^sarcolemma`GO:0004051^…	GO:0005737^cellular_component^cytoplasm`GO:0005829^cellular_component^cytosol`GO:0030425^cellular_component^dendrite`GO:0005635^cellular_component^nuclear envelope`GO:0005641^cellular_component^nuclear envelope lumen`GO:0016363^cellular_component^nuclear matrix`GO:0031965^cellular_component^nuclear membrane`GO:0005634^cellular_component^nucleus`GO:0042383^cellular_component^sarcolemma`GO:0004051^…	GO:0005829;GO:0030425;GO:0005635;GO:0005641;GO:0016363;GO:0016363;GO:0031965;GO:0005634;GO:0042383;GO:0004051;GO:0005506;GO:0002526;GO:0006954;GO:0019370;GO:0006691;GO:0002540;GO:1904960;GO:0045907;GO:0055093;GO:0007584;GO:0019233;	Y	FALSE	FALSE	7.80347	1.01156	7.51445	5.20231	4.62428	5.78035	2.89017	2.74566	4.91329	10.4046	3.03468	4.04624	5.49133	5.34682	7.36994	5.92486	4.62428	5.49133	1.15607	4.62428	100	12.7168	10.4046
>TRINITY_DN1770_c0_g1_i11.p1 TRINITY_DN1770_c0_g1~~TRINITY_DN1770_c0_g1_i11.p1 ORF type:complete len:331 (-),score=56.17 TRINITY_DN1770_c0_g1_i11:340-1332(-)	6.44	470.3	3	2	0	6.97	330	TRINITY_DN1770_c0_g1_i11.p1	TRINITY_DN1770_c0_g1_i11	CATL_SARPE^CATL_SARPE^Q:1254-343,H:27-339^58.466%ID^E:5.78e-126^RecName: Full	Cathepsin L	CATL_SARPE^CATL_SARPE^Q:27-330,H:27-339^58.466%ID^E:2.78e-128^RecName: Full=Cathepsin L;^Eukaryota; Metazoa; Ecdysozoa; Arthropoda; Hexapoda; Insecta; Pterygota; Neoptera; Holometabola; Diptera; Brachycera; Muscomorpha; Oestroidea; Sarcophagidae; Sarcophaga; Boettcherisca	.	.	.	.	GO:0005764^cellular_component^lysosome`GO:0008234^molecular_function^cysteine-type peptidase activity`GO:0030154^biological_process^cell differentiation`GO:0007275^biological_process^multicellular organism development	GO:0005764^cellular_component^lysosome`GO:0008234^molecular_function^cysteine-type peptidase activity`GO:0030154^biological_process^cell differentiation`GO:0007275^biological_process^multicellular organism development	GO:0008234;GO:0030154;GO:0007275;	Y	+	FALSE	8.48485	2.42424	5.75758	4.54545	4.24242	10.303	3.33333	3.63636	5.15152	6.36364	1.81818	6.06061	2.72727	5.15152	3.33333	7.27273	5.75758	5.75758	2.42424	5.45455	100	10.303	12.1212	SP(Sec/SPI)	0.982816	0.017184	CS pos: 16-17. CQG-FT. Pr: 0.7485
>TRINITY_DN1796_c0_g1_i12.p1 TRINITY_DN1796_c0_g1~~TRINITY_DN1796_c0_g1_i12.p1 ORF type:complete len:659 (-),score=152.21 TRINITY_DN1796_c0_g1_i12:151-2127(-)	4.57	469.8	4	3	0	5.32	658	TRINITY_DN1796_c0_g1_i12.p1	TRINITY_DN1796_c0_g1_i12	ACE_CHICK^ACE_CHICK^Q:1992-238,H:538-1119^49.915%ID^E:0^RecName: Full	Angiotensin-converting enzyme	ACE_CHICK^ACE_CHICK^Q:46-630,H:538-1119^49.915%ID^E:0^RecName: Full=Angiotensin-converting enzyme;^Eukaryota; Metazoa; Chordata; Craniata; Vertebrata; Euteleostomi; Archelosauria; Archosauria; Dinosauria; Saurischia; Theropoda; Coelurosauria; Aves; Neognathae; Galloanserae; Galliformes; Phasianidae; Phasianinae; Gallus	tr|A0A3M6UEC9|A0A3M6UEC9_9CNID^tr|A0A3M6UEC9|A0A3M6UEC9_9CNID^Q:1252-740,H:1-171^94.737%ID^E:2.25e-108^.^.	ExpAA=30.11^PredHel=1^Topology=o635-657i	ENOG410XPJ3^Angiotensin I converting enzyme peptidyl-dipeptidase A	.	GO:0005615^cellular_component^extracellular space`GO:0016021^cellular_component^integral component of membrane`GO:0005886^cellular_component^plasma membrane`GO:0004180^molecular_function^carboxypeptidase activity`GO:0008239^molecular_function^dipeptidyl-peptidase activity`GO:0008238^molecular_function^exopeptidase activity`GO:0008237^molecular_function^metallopeptidase activity`GO:0008241^molecul…	GO:0005615^cellular_component^extracellular space`GO:0016021^cellular_component^integral component of membrane`GO:0005886^cellular_component^plasma membrane`GO:0004180^molecular_function^carboxypeptidase activity`GO:0008239^molecular_function^dipeptidyl-peptidase activity`GO:0008238^molecular_function^exopeptidase activity`GO:0008237^molecular_function^metallopeptidase activity`GO:0008241^molecul…	GO:0016021;GO:0005886;GO:0004180;GO:0008239;GO:0008238;GO:0008238;GO:0008237;GO:0008241;GO:0008270;GO:0008283;GO:0045777;GO:0003084;GO:0060319;GO:0003081	Y	+	FALSE	8.05471	1.21581	6.231	5.92705	4.71125	5.31915	2.43161	3.34347	8.35866	9.42249	2.43161	3.64742	4.55927	4.10334	5.47112	6.231	5.0152	6.07903	2.88754	4.55927	100	12.1581	12.1581	OTHER	0.376985	0.623015
>TRINITY_DN21001_c0_g1_i4.p1 TRINITY_DN21001_c0_g1~~TRINITY_DN21001_c0_g1_i4.p1 ORF type:internal len:342 (-),score=19.29 TRINITY_DN21001_c0_g1_i4:3-1025(-)	1.78	435.3	2	2	1	2.35	341	TRINITY_DN21001_c0_g1_i4.p1	TRINITY_DN21001_c0_g1_i4	no blast hit	no blast hit	.	.	.	.	.	.	.		Y	FALSE	FALSE	6.45161	2.6393	3.22581	2.34604	1.75953	23.1672	1.75953	2.6393	2.93255	4.39883	1.46628	5.27859	2.93255	4.69208	5.27859	9.67742	5.8651	8.5044	0.879765	4.10557	100	5.57185	6.74487
>TRINITY_DN2178_c0_g1_i9.p2 TRINITY_DN2178_c0_g1~~TRINITY_DN2178_c0_g1_i9.p2 ORF type:complete len:107 (+),score=21.63 TRINITY_DN2178_c0_g1_i9:305-625(+)	20.28	641.6	8	6	1	54.72	106	TRINITY_DN2178_c0_g1_i9.p2	TRINITY_DN2178_c0_g1_i9	THIO_GEOCY^THIO_GEOCY^Q:305-619,H:1-105^61.321%ID^E:1.09e-35^RecName: Full	Thioredoxin	THIO_GEOCY^THIO_GEOCY^Q:1-105,H:1-105^61.321%ID^E:6.68e-38^RecName: Full=Thioredoxin;^Eukaryota; Metazoa; Porifera; Demospongiae; Heteroscleromorpha; Tetractinellida; Astrophorina; Geodiidae; Geodia	.	.	.	.	GO:0005623^cellular_component^cell`GO:0005737^cellular_component^cytoplasm`GO:0015035^molecular_function^protein disulfide oxidoreductase activity`GO:0045454^biological_process^cell redox homeostasis`GO:0006662^biological_process^glycerol ether metabolic process	GO:0005623^cellular_component^cell`GO:0005737^cellular_component^cytoplasm`GO:0015035^molecular_function^protein disulfide oxidoreductase activity`GO:0045454^biological_process^cell redox homeostasis`GO:0006662^biological_process^glycerol ether metabolic process	GO:0005737;GO:0015035;GO:0045454;GO:0006662	Y	+	FALSE	11.3208	2.83019	6.60377	13.2075	3.77358	3.77358	0.943396	6.60377	14.1509	4.71698	2.83019	3.77358	3.77358	0	0.943396	3.77358	2.83019	10.3774	0.943396	2.83019	100	19.8113	7.54717	OTHER	0.001177	0.998823
>TRINITY_DN21906_c0_g2_i4.p1 TRINITY_DN21906_c0_g2~~TRINITY_DN21906_c0_g2_i4.p1 ORF type:internal len:173 (+),score=34.51 TRINITY_DN21906_c0_g2_i4:1-516(+)	8	612.5	7	2	0	17.44	172	TRINITY_DN21906_c0_g2_i4.p1	TRINITY_DN21906_c0_g2_i4	UROM_HUMAN^UROM_HUMAN^Q:10-231,H:219-293^44%ID^E:2.99e-12^RecName: Full	Uromodulin	UROM_HUMAN^UROM_HUMAN^Q:4-80,H:219-296^43.59%ID^E:6.9e-13^RecName: Full=Uromodulin;^Eukaryota; Metazoa; Chordata; Craniata; Vertebrata; Euteleostomi; Mammalia; Eutheria; Euarchontoglires; Primates; Haplorrhini; Catarrhini; Hominidae; Homo	.	.	ENOG410YDU6^antigen transcytosis by M cells in mucosal-associated lymphoid tissue	KEGG:hsa:7369`KO:K18274	GO:0031225^cellular_component^anchored component of membrane`GO:0016324^cellular_component^apical plasma membrane`GO:0016323^cellular_component^basolateral plasma membrane`GO:0060170^cellular_component^ciliary membrane`GO:0005929^cellular_component^cilium`GO:0070062^cellular_component^extracellular exosome`GO:0019898^cellular_component^extrinsic component of membrane`GO:0005796^cellular_component…	GO:0031225^cellular_component^anchored component of membrane`GO:0016324^cellular_component^apical plasma membrane`GO:0016323^cellular_component^basolateral plasma membrane`GO:0060170^cellular_component^ciliary membrane`GO:0005929^cellular_component^cilium`GO:0070062^cellular_component^extracellular exosome`GO:0019898^cellular_component^extrinsic component of membrane`GO:0005796^cellular_component…	GO:0016324;GO:0016323;GO:0060170;GO:0005929;GO:0070062;GO:0070062;GO:0019898;GO:0005796;GO:0000922;GO:0005509;GO:0019864;GO:0006968;GO:0007588;GO:0007157;GO:0050801;GO:0007159;GO:0072218;GO:0072221;GO:0072233;GO:0008285;GO:1990266;	Y	FALSE	FALSE	8.13953	4.06977	1.74419	7.55814	5.23256	9.30233	1.16279	1.74419	9.30233	6.97674	0	3.48837	9.30233	0.581395	5.23256	4.06977	8.13953	9.30233	0.581395	4.06977	100	9.30233	9.88372
>TRINITY_DN22686_c0_g1_i1.p1 TRINITY_DN22686_c0_g1~~TRINITY_DN22686_c0_g1_i1.p1 ORF type:internal len:369 (-),score=120.42 TRINITY_DN22686_c0_g1_i1:2-1105(-)	2.2	401.1	3	3	1	22.83	368	TRINITY_DN22686_c0_g1_i1.p1	TRINITY_DN22686_c0_g1_i1	no blast hit	no blast hit	.	.	.	.	.	.	.		Y	FALSE	FALSE	10.3261	0	7.33696	15.4891	1.3587	4.34783	1.63043	4.07609	5.97826	10.3261	1.63043	2.44565	4.61957	6.52174	4.61957	4.8913	4.8913	7.88043	1.08696	0.543478	100	22.8261	2.98913
>TRINITY_DN2309_c1_g1_i1.p1 TRINITY_DN2309_c1_g1~~TRINITY_DN2309_c1_g1_i1.p1 ORF type:5prime_partial len:524 (+),score=179.25 TRINITY_DN2309_c1_g1_i1:1-1572(+)	28.71	763.2	4	4	0	8.99	523	TRINITY_DN2309_c1_g1_i1.p1	TRINITY_DN2309_c1_g1_i1	no blast hit	no blast hit	.	.	ExpAA=21.94^PredHel=1^Topology=i21-43o	.	.	.	.		Y	FALSE	FALSE	5.73614	0.191205	11.6635	14.3403	1.14723	5.54493	1.33843	1.52964	12.0459	5.73614	0.764818	6.50096	1.33843	7.26577	4.39771	11.4723	2.48566	4.97132	0.573614	0.956023	100	26.0038	2.67686
>TRINITY_DN23444_c0_g1_i1.p1 TRINITY_DN23444_c0_g1~~TRINITY_DN23444_c0_g1_i1.p1 ORF type:internal len:497 (-),score=156.17 TRINITY_DN23444_c0_g1_i1:1-1488(-)	2.06	446.4	3	3	0	5.44	496	TRINITY_DN23444_c0_g1_i1.p1	TRINITY_DN23444_c0_g1_i1	MACF1_RAT^MACF1_RAT^Q:1332-4,H:4136-4575^22.022%ID^E:1.42e-22^RecName: Full	Microtubule-actin cross-linking factor 1	MACF1_RAT^MACF1_RAT^Q:53-495,H:4136-4575^22.022%ID^E:1.28e-22^RecName: Full=Microtubule-actin cross-linking factor 1;^Eukaryota; Metazoa; Chordata; Craniata; Vertebrata; Euteleostomi; Mammalia; Eutheria; Euarchontoglires; Glires; Rodentia; Myomorpha; Muroidea; Muridae; Murinae; Rattus	.	.	COG5069^Microtubule associated monoxygenase, calponin and LIM domain containing	.	GO:0015629^cellular_component^actin cytoskeleton`GO:0005737^cellular_component^cytoplasm`GO:0005794^cellular_component^Golgi apparatus`GO:0016020^cellular_component^membrane`GO:0005874^cellular_component^microtubule`GO:0015630^cellular_component^microtubule cytoskeleton`GO:0005886^cellular_component^plasma membrane`GO:0014069^cellular_component^postsynaptic density`GO:0032587^cellular_component^r…	GO:0015629^cellular_component^actin cytoskeleton`GO:0005737^cellular_component^cytoplasm`GO:0005794^cellular_component^Golgi apparatus`GO:0016020^cellular_component^membrane`GO:0005874^cellular_component^microtubule`GO:0015630^cellular_component^microtubule cytoskeleton`GO:0005886^cellular_component^plasma membrane`GO:0014069^cellular_component^postsynaptic density`GO:0032587^cellular_component^r…	GO:0005737;GO:0005794;GO:0016020;GO:0005874;GO:0015630;GO:0015630;GO:0005886;GO:0014069;GO:0032587;GO:0003779;GO:0051015;GO:0016887;GO:0005509;GO:0008017;GO:0051011;GO:0007163;GO:0043001;GO:0045104;GO:0001707;GO:0045773;GO:0030177;GO:0006620;GO:0030334;GO:0010632;GO:0051893;GO:0032886;GO:0150011;GO:0016055;GO:0042060;	Y	FALSE	FALSE	8.26613	0.806452	9.67742	12.5	1.41129	2.82258	1.20968	3.62903	6.65323	10.0806	2.21774	4.23387	3.62903	7.05645	6.04839	3.83065	2.82258	10.2823	1.00806	1.81452	100	22.1774	4.23387
>TRINITY_DN25259_c0_g1_i13.p1 TRINITY_DN25259_c0_g1~~TRINITY_DN25259_c0_g1_i13.p1 ORF type:3prime_partial len:183 (-),score=36.38 TRINITY_DN25259_c0_g1_i13:1-546(-)	1.91	409	3	3	0	14.29	182	TRINITY_DN25259_c0_g1_i13.p1	TRINITY_DN25259_c0_g1_i13	CD151_MACMU^CD151_MACMU^Q:579-100,H:24-193^40%ID^E:4.22e-28^RecName: Full	CD151 antigen	TSN11_HUMAN^TSN11_HUMAN^Q:1-144,H:35-186^35.526%ID^E:7.99e-30^RecName: Full=Tetraspanin-11;^Eukaryota; Metazoa; Chordata; Craniata; Vertebrata; Euteleostomi; Mammalia; Eutheria; Euarchontoglires; Primates; Haplorrhini; Catarrhini; Hominidae; Homo	.	ExpAA=45.06^PredHel=2^Topology=o26-48i55-77o	ENOG4111IRY^tetraspanin	KEGG:hsa:441631`KO:K17352	GO:0005887^cellular_component^integral component of plasma membrane`GO:0005178^molecular_function^integrin binding`GO:0016477^biological_process^cell migration	GO:0005887^cellular_component^integral component of plasma membrane`GO:0016477^biological_process^cell migration	GO:0016477;	Y	FALSE	+	9.34066	3.84615	3.84615	7.14286	4.94505	6.04396	1.0989	9.89011	8.79121	7.69231	2.1978	4.94505	2.74725	3.2967	2.1978	5.49451	6.04396	4.94505	1.0989	4.3956	100	10.989	10.4396
>TRINITY_DN26948_c0_g1_i2.p1 TRINITY_DN26948_c0_g1~~TRINITY_DN26948_c0_g1_i2.p1 ORF type:complete len:243 (-),score=84.30 TRINITY_DN26948_c0_g1_i2:557-1285(-)	20.14	701.4	10	6	0	13.64	242	TRINITY_DN26948_c0_g1_i2.p1	TRINITY_DN26948_c0_g1_i2	TPM_BRABE^TPM_BRABE^Q:1171-560,H:81-284^47.549%ID^E:1.05e-28^RecName: Full	Tropomyosin	TPM_BRABE^TPM_BRABE^Q:4-242,H:46-284^43.933%ID^E:1.84e-44^RecName: Full=Tropomyosin;^Eukaryota; Metazoa; Chordata; Cephalochordata; Branchiostomidae; Branchiostoma	.	.	.	.	.	.		Y	+	FALSE	12.8099	0	7.85124	21.0744	0	2.89256	0.413223	2.47934	9.50413	10.3306	1.23967	3.71901	0	3.30579	7.43802	4.13223	5.3719	6.19835	0	1.23967	100	28.9256	1.23967	OTHER	0.00018	0.99982
>TRINITY_DN271_c0_g1_i13.p1 TRINITY_DN271_c0_g1~~TRINITY_DN271_c0_g1_i13.p1 ORF type:complete len:174 (+),score=54.17 TRINITY_DN271_c0_g1_i13:136-657(+)	4.87	565.5	2	2	0	9.83	173	TRINITY_DN271_c0_g1_i13.p1	TRINITY_DN271_c0_g1_i13	FRIS_LYMST^FRIS_LYMST^Q:139-642,H:3-170^73.214%ID^E:8.76e-88^RecName: Full	Soma ferritin	FRIS_LYMST^FRIS_LYMST^Q:2-169,H:3-170^73.214%ID^E:7.14e-90^RecName: Full=Soma ferritin;^Eukaryota; Metazoa; Lophotrochozoa; Mollusca; Gastropoda; Heterobranchia; Euthyneura; Panpulmonata; Hygrophila; Lymnaeoidea; Lymnaeidae; Lymnaea	.	.	.	.	GO:0005623^cellular_component^cell`GO:0005737^cellular_component^cytoplasm`GO:0008199^molecular_function^ferric iron binding`GO:0004322^molecular_function^ferroxidase activity`GO:0006879^biological_process^cellular iron ion homeostasis`GO:0006826^biological_process^iron ion transport	GO:0005623^cellular_component^cell`GO:0005737^cellular_component^cytoplasm`GO:0008199^molecular_function^ferric iron binding`GO:0004322^molecular_function^ferroxidase activity`GO:0006879^biological_process^cellular iron ion homeostasis`GO:0006826^biological_process^iron ion transport	GO:0005737;GO:0008199;GO:0004322;GO:0006879;GO:0006826;GO:0006826	Y	+	FALSE	6.93642	1.15607	8.67052	9.82659	4.04624	6.93642	4.04624	3.46821	8.09249	10.4046	4.04624	4.04624	1.7341	5.78035	4.62428	3.46821	2.89017	5.20231	0.578035	4.04624	100	18.4971	8.67052	OTHER	0.000399	0.999601
>TRINITY_DN27513_c0_g1_i1.p1 TRINITY_DN27513_c0_g1~~TRINITY_DN27513_c0_g1_i1.p1 ORF type:3prime_partial len:968 (-),score=303.81 TRINITY_DN27513_c0_g1_i1:2-2902(-)	5.13	652.3	3	2	0	1.76	967	TRINITY_DN27513_c0_g1_i1.p1	TRINITY_DN27513_c0_g1_i1	no blast hit	no blast hit	.	.	.	.	.	.	.		Y	FALSE	+	4.65357	0.206825	6.41158	17.2699	2.99897	3.72285	0.827301	3.61944	8.1696	4.55016	0.827301	3.51603	6.51499	6.51499	10.3413	7.13547	4.44674	7.13547	0.41365	0.723888	100	23.6815	4.1365
>TRINITY_DN2817_c1_g1_i3.p1 TRINITY_DN2817_c1_g1~~TRINITY_DN2817_c1_g1_i3.p1 ORF type:5prime_partial len:309 (-),score=35.36 TRINITY_DN2817_c1_g1_i3:238-1164(-)	9.57	502.7	7	5	1	18.18	308	TRINITY_DN2817_c1_g1_i3.p1	TRINITY_DN2817_c1_g1_i3	no blast hit	no blast hit	.	.	.	.	.	.	.		Y	FALSE	FALSE	9.09091	9.74026	6.49351	5.19481	4.54545	6.16883	1.2987	2.92208	5.84416	6.81818	1.62338	5.19481	6.81818	3.24675	2.92208	6.49351	5.19481	7.46753	0.649351	2.27273	100	11.6883	7.46753
>TRINITY_DN28402_c0_g1_i1.p1 TRINITY_DN28402_c0_g1~~TRINITY_DN28402_c0_g1_i1.p1 ORF type:internal len:133 (+),score=45.95 TRINITY_DN28402_c0_g1_i1:3-398(+)	1.97	512.4	2	2	0	12.88	132	TRINITY_DN28402_c0_g1_i1.p1	TRINITY_DN28402_c0_g1_i1	no blast hit	no blast hit	.	.	.	.	.	.	.		Y	FALSE	FALSE	11.3636	1.51515	8.33333	15.1515	1.51515	0.757576	1.51515	3.78788	12.1212	8.33333	1.51515	4.54545	3.78788	6.06061	1.51515	6.06061	3.0303	5.30303	1.51515	2.27273	100	23.4848	5.30303
>TRINITY_DN2863_c0_g1_i1.p1 TRINITY_DN2863_c0_g1~~TRINITY_DN2863_c0_g1_i1.p1 ORF type:5prime_partial len:286 (+),score=28.66 TRINITY_DN2863_c0_g1_i1:2-859(+)	7.21	631.1	3	3	0	11.93	285	TRINITY_DN2863_c0_g1_i1.p1	TRINITY_DN2863_c0_g1_i1	no blast hit	no blast hit	.	.	ExpAA=21.30^PredHel=1^Topology=i35-57o	.	.	.	.		Y	FALSE	FALSE	10.1754	5.26316	3.15789	1.75439	3.15789	5.26316	3.50877	3.50877	8.07018	7.01754	2.80702	3.15789	10.5263	4.21053	2.45614	8.42105	6.31579	7.36842	0.350877	3.50877	100	4.91228	7.01754
>TRINITY_DN292_c0_g1_i10.p1 TRINITY_DN292_c0_g1~~TRINITY_DN292_c0_g1_i10.p1 ORF type:complete len:198 (-),score=16.83 TRINITY_DN292_c0_g1_i10:248-841(-)	8.11	580.8	3	3	0	12.69	197	TRINITY_DN292_c0_g1_i10.p1	TRINITY_DN292_c0_g1_i10	no blast hit	no blast hit	.	.	ExpAA=19.67^PredHel=1^Topology=o15-34i	.	.	.	.		Y	+	FALSE	7.1066	1.01523	6.59898	4.06091	3.5533	9.64467	3.04569	4.06091	5.07614	8.62944	2.03046	6.59898	2.03046	2.53807	7.61421	8.62944	4.56853	7.61421	0.507614	5.07614	100	10.6599	9.13706	OTHER	0.439624	0.560376
>TRINITY_DN2941_c0_g1_i1.p1 TRINITY_DN2941_c0_g1~~TRINITY_DN2941_c0_g1_i1.p1 ORF type:complete len:214 (+),score=38.94 TRINITY_DN2941_c0_g1_i1:95-736(+)	7.45	600.8	3	2	0	9.39	213	TRINITY_DN2941_c0_g1_i1.p1	TRINITY_DN2941_c0_g1_i1	FKB2B_RHIO9^FKB2B_RHIO9^Q:197-487,H:40-136^70.103%ID^E:2.68e-43^RecName: Full	FK506-binding protein 2B	FKB2B_RHIO9^FKB2B_RHIO9^Q:32-131,H:37-136^70%ID^E:3.73e-46^RecName: Full=FK506-binding protein 2B;^Eukaryota; Fungi; Fungi incertae sedis; Mucoromycota; Mucoromycotina; Mucoromycetes; Mucorales; Mucorineae; Rhizopodaceae; Rhizopus	.	.	.	.	GO:0016021^cellular_component^integral component of membrane`GO:0003755^molecular_function^peptidyl-prolyl cis-trans isomerase activity	GO:0016021^cellular_component^integral component of membrane`GO:0003755^molecular_function^peptidyl-prolyl cis-trans isomerase activity	GO:0003755;	Y	+	FALSE	2.8169	1.40845	8.92019	12.6761	4.69484	8.92019	2.8169	5.6338	8.92019	10.3286	1.40845	4.69484	5.16432	3.28638	2.8169	5.16432	4.22535	4.69484	0.469484	0.938967	100	21.5962	6.10329	SP(Sec/SPI)	0.997489	0.002511	CS pos: 19-20. VKG-EE. Pr: 0.9739
>TRINITY_DN3014_c2_g1_i10.p1 TRINITY_DN3014_c2_g1~~TRINITY_DN3014_c2_g1_i10.p1 ORF type:5prime_partial len:318 (+),score=30.04 TRINITY_DN3014_c2_g1_i10:3-956(+)	16.53	654.5	8	5	0	15.14	317	TRINITY_DN3014_c2_g1_i10.p1	TRINITY_DN3014_c2_g1_i10	CATZ_BOVIN^CATZ_BOVIN^Q:141-953,H:34-304^66.667%ID^E:1.33e-128^RecName: Full	Cathepsin Z	CATZ_BOVIN^CATZ_BOVIN^Q:47-317,H:34-304^66.667%ID^E:7.34e-137^RecName: Full=Cathepsin Z;^Eukaryota; Metazoa; Chordata; Craniata; Vertebrata; Euteleostomi; Mammalia; Eutheria; Laurasiatheria; Artiodactyla; Ruminantia; Pecora; Bovidae; Bovinae; Bos	.	.	COG4870^cathepsin	KEGG:bta:404187`KO:K08568	GO:0005615^cellular_component^extracellular space`GO:0005764^cellular_component^lysosome`GO:0004197^molecular_function^cysteine-type endopeptidase activity`GO:0051603^biological_process^proteolysis involved in cellular protein catabolic process	GO:0005615^cellular_component^extracellular space`GO:0005764^cellular_component^lysosome`GO:0004197^molecular_function^cysteine-type endopeptidase activity`GO:0051603^biological_process^proteolysis involved in cellular protein catabolic process	GO:0005764;GO:0004197;GO:0051603;	Y	FALSE	FALSE	7.25552	4.4164	4.4164	4.73186	2.83912	10.4101	2.52366	5.67823	6.62461	3.78549	2.2082	5.99369	4.10095	3.47003	4.10095	5.36278	5.99369	7.25552	3.15457	5.67823	100	9.14826	11.6719
>TRINITY_DN30599_c0_g1_i2.p1 TRINITY_DN30599_c0_g1~~TRINITY_DN30599_c0_g1_i2.p1 ORF type:5prime_partial len:1404 (-),score=233.93 TRINITY_DN30599_c0_g1_i2:1196-5407(-)	13.68	644.6	5	4	1	2.71	1403	TRINITY_DN30599_c0_g1_i2.p1	TRINITY_DN30599_c0_g1_i2	no blast hit	no blast hit	.	tr|A0A3M6TTH6|A0A3M6TTH6_9CNID^tr|A0A3M6TTH6|A0A3M6TTH6_9CNID^Q:1374-1,H:552-996^65.142%ID^E:3.52e-145^.^.	.	.	.	.	.		Y	FALSE	FALSE	8.90948	0.784034	7.27014	9.40841	1.49679	11.3329	0.926586	3.77762	4.84676	6.05845	1.28297	4.20527	5.91589	4.84676	2.49465	14.0413	5.77334	5.13186	0.285103	1.21169	100	16.6785	2.99359
>TRINITY_DN31096_c0_g1_i3.p1 TRINITY_DN31096_c0_g1~~TRINITY_DN31096_c0_g1_i3.p1 ORF type:5prime_partial len:155 (-),score=16.06 TRINITY_DN31096_c0_g1_i3:125-589(-)	0.92	365	2	2	0	9.74	154	TRINITY_DN31096_c0_g1_i3.p1	TRINITY_DN31096_c0_g1_i3	no blast hit	no blast hit	.	.	ExpAA=18.17^PredHel=1^Topology=i20-37o	.	.	.	.		Y	FALSE	FALSE	8.44156	9.09091	9.74026	7.79221	1.94805	6.49351	1.2987	2.5974	5.19481	8.44156	1.94805	3.8961	3.8961	3.24675	9.09091	1.2987	5.84416	6.49351	0	3.24675	100	17.5325	5.19481
>TRINITY_DN3190_c0_g1_i6.p1 TRINITY_DN3190_c0_g1~~TRINITY_DN3190_c0_g1_i6.p1 ORF type:complete len:150 (-),score=35.54 TRINITY_DN3190_c0_g1_i6:429-878(-)	2.88	509.5	3	2	0	12.08	149	TRINITY_DN3190_c0_g1_i6.p1	TRINITY_DN3190_c0_g1_i6	no blast hit	no blast hit	.	.	.	.	.	.	.		Y	+	FALSE	7.38255	2.01342	6.04027	5.36913	0.671141	6.04027	1.34228	2.01342	12.7517	9.39597	2.68456	6.71141	6.04027	5.36913	4.69799	8.05369	4.02685	4.69799	1.34228	3.3557	100	11.4094	5.36913	OTHER	0.001975	0.998025
>TRINITY_DN32375_c1_g1_i11.p1 TRINITY_DN32375_c1_g1~~TRINITY_DN32375_c1_g1_i11.p1 ORF type:3prime_partial len:270 (+),score=36.37 TRINITY_DN32375_c1_g1_i11:68-874(+)	13.7	688.2	5	4	0	15.24	269	TRINITY_DN32375_c1_g1_i11.p1	TRINITY_DN32375_c1_g1_i11	MFGM_RAT^MFGM_RAT^Q:11-331,H:319-427^43.119%ID^E:7.55e-24^RecName: Full	Lactadherin	MFGM_RAT^MFGM_RAT^Q:3-88,H:340-427^43.182%ID^E:7.45e-18^RecName: Full=Lactadherin;^Eukaryota; Metazoa; Chordata; Craniata; Vertebrata; Euteleostomi; Mammalia; Eutheria; Euarchontoglires; Glires; Rodentia; Myomorpha; Muroidea; Muridae; Murinae; Rattus	.	.	.	KEGG:rno:25277`KO:K17253	GO:0009897^cellular_component^external side of plasma membrane`GO:0005615^cellular_component^extracellular space`GO:0019897^cellular_component^extrinsic component of plasma membrane`GO:0005178^molecular_function^integrin binding`GO:0008429^molecular_function^phosphatidylethanolamine binding`GO:0001786^molecular_function^phosphatidylserine binding`GO:0001525^biological_process^angiogenesis`GO:0043…	GO:0009897^cellular_component^external side of plasma membrane`GO:0005615^cellular_component^extracellular space`GO:0019897^cellular_component^extrinsic component of plasma membrane`GO:0005178^molecular_function^integrin binding`GO:0008429^molecular_function^phosphatidylethanolamine binding`GO:0001786^molecular_function^phosphatidylserine binding`GO:0001525^biological_process^angiogenesis`GO:0043…	GO:0005615;GO:0019897;GO:0005178;GO:0008429;GO:0001786;GO:0001786;GO:0001525;GO:0043277;GO:0007155;GO:0006911;GO:0006910;GO:0008284;GO:0050766;GO:0043627;GO:0007338;	Y	FALSE	+	8.17844	0.743494	3.34572	2.97398	1.85874	10.7807	1.48699	2.97398	4.08922	2.97398	2.23048	4.46097	11.1524	4.08922	3.71747	15.2416	12.6394	3.71747	1.85874	1.48699	100	6.3197	5.20446
>TRINITY_DN32375_c1_g1_i5.p1 TRINITY_DN32375_c1_g1~~TRINITY_DN32375_c1_g1_i5.p1 ORF type:3prime_partial len:210 (+),score=28.65 TRINITY_DN32375_c1_g1_i5:68-694(+)	2	464.6	2	2	0	12.44	209	TRINITY_DN32375_c1_g1_i5.p1	TRINITY_DN32375_c1_g1_i5	EDIL3_MOUSE^EDIL3_MOUSE^Q:11-691,H:204-408^32.636%ID^E:2.28e-33^RecName: Full	EGF-like repeat and discoidin I-like domain-containing protein 3	FA5_MOUSE^FA5_MOUSE^Q:4-209,H:1932-2113^37.963%ID^E:4.88e-29^RecName: Full=Coagulation factor V;^Eukaryota; Metazoa; Chordata; Craniata; Vertebrata; Euteleostomi; Mammalia; Eutheria; Euarchontoglires; Glires; Rodentia; Myomorpha; Muroidea; Muridae; Murinae; Mus; Mus	.	.	ENOG4111F6G^coagulation factor	KEGG:mmu:14067`KO:K03902	GO:0005576^cellular_component^extracellular region`GO:0005509^molecular_function^calcium ion binding`GO:0005178^molecular_function^integrin binding`GO:0007155^biological_process^cell adhesion`GO:0007275^biological_process^multicellular organism development`GO:0010811^biological_process^positive regulation of cell-substrate adhesion	GO:0005783^cellular_component^endoplasmic reticulum`GO:0005576^cellular_component^extracellular region`GO:0005615^cellular_component^extracellular space`GO:0005794^cellular_component^Golgi apparatus`GO:0031091^cellular_component^platelet alpha granule`GO:0005507^molecular_function^copper ion binding`GO:0008015^biological_process^blood circulation`GO:0007596^biological_process^blood coagulation	GO:0005576;GO:0005615;GO:0005794;GO:0031091;GO:0005507;GO:0005507;GO:0008015;GO:0007596	Y	FALSE	+	7.17703	0.956938	5.74163	4.78469	1.91388	8.61244	1.91388	3.34928	4.30622	3.34928	3.34928	3.82775	6.69856	6.2201	4.30622	11.0048	11.0048	5.74163	2.87081	2.87081	100	10.5263	7.6555
>TRINITY_DN3274_c0_g1_i6.p1 TRINITY_DN3274_c0_g1~~TRINITY_DN3274_c0_g1_i6.p1 ORF type:complete len:361 (-),score=82.16 TRINITY_DN3274_c0_g1_i6:780-1862(-)	3.22	492	4	3	0	9.17	360	TRINITY_DN3274_c0_g1_i6.p1	TRINITY_DN3274_c0_g1_i6	PDI22_ORYSJ^PDI22_ORYSJ^Q:1802-810,H:36-369^48.81%ID^E:4.82e-112^RecName: Full	Protein disulfide isomerase-like 2-2	PDI22_ORYSJ^PDI22_ORYSJ^Q:21-351,H:36-369^48.81%ID^E:8.17e-117^RecName: Full=Protein disulfide isomerase-like 2-2;^Eukaryota; Viridiplantae; Streptophyta; Embryophyta; Tracheophyta; Spermatophyta; Magnoliopsida; Liliopsida; Poales; Poaceae; BOP clade; Oryzoideae; Oryzeae; Oryzinae; Oryza; Oryza sativa	tr|A0A2B4SGN7|A0A2B4SGN7_STYPI^tr|A0A2B4SGN7|A0A2B4SGN7_STYPI^Q:394-23,H:143-266^88.71%ID^E:3.24e-68^.^.	.	COG0526^Thioredoxin	KEGG:osa:4326806`KO:K09584	GO:0005623^cellular_component^cell`GO:0005783^cellular_component^endoplasmic reticulum`GO:0005576^cellular_component^extracellular region`GO:0003756^molecular_function^protein disulfide isomerase activity`GO:0045454^biological_process^cell redox homeostasis	GO:0005623^cellular_component^cell`GO:0005783^cellular_component^endoplasmic reticulum`GO:0005576^cellular_component^extracellular region`GO:0003756^molecular_function^protein disulfide isomerase activity`GO:0045454^biological_process^cell redox homeostasis	GO:0005783;GO:0005576;GO:0003756;GO:0045454	Y	+	FALSE	9.16667	1.66667	8.05556	8.33333	6.94444	8.05556	0.833333	3.61111	7.77778	6.94444	2.22222	6.11111	3.61111	2.5	4.16667	4.72222	4.16667	7.77778	0.555556	2.77778	100	16.3889	10.2778	SP(Sec/SPI)	0.976247	0.023753	CS pos: 20-21. SVG-NV. Pr: 0.7353
>TRINITY_DN329_c0_g1_i14.p1 TRINITY_DN329_c0_g1~~TRINITY_DN329_c0_g1_i14.p1 ORF type:complete len:391 (-),score=72.72 TRINITY_DN329_c0_g1_i14:1024-2196(-)	4.74	373.2	2	2	1	6.92	390	TRINITY_DN329_c0_g1_i14.p1	TRINITY_DN329_c0_g1_i14	FAT3_MOUSE^FAT3_MOUSE^Q:1515-1279,H:4022-4096^50.633%ID^E:8.95e-16^RecName: Full	Protocadherin Fat 3	FAT3_MOUSE^FAT3_MOUSE^Q:228-306,H:4022-4096^50.633%ID^E:9.07e-17^RecName: Full=Protocadherin Fat 3;^Eukaryota; Metazoa; Chordata; Craniata; Vertebrata; Euteleostomi; Mammalia; Eutheria; Euarchontoglires; Glires; Rodentia; Myomorpha; Muroidea; Muridae; Murinae; Mus; Mus	.	.	ENOG410XPEI^homophilic cell adhesion	.	GO:0030425^cellular_component^dendrite`GO:0016021^cellular_component^integral component of membrane`GO:0005886^cellular_component^plasma membrane`GO:0005509^molecular_function^calcium ion binding`GO:0000904^biological_process^cell morphogenesis involved in differentiation`GO:0098609^biological_process^cell-cell adhesion`GO:0007156^biological_process^homophilic cell adhesion via plasma membrane ad…	GO:0030425^cellular_component^dendrite`GO:0016021^cellular_component^integral component of membrane`GO:0005886^cellular_component^plasma membrane`GO:0005509^molecular_function^calcium ion binding`GO:0000904^biological_process^cell morphogenesis involved in differentiation`GO:0098609^biological_process^cell-cell adhesion`GO:0007156^biological_process^homophilic cell adhesion via plasma membrane ad…	GO:0016021;GO:0005886;GO:0005509;GO:0000904;GO:0098609;GO:0098609;GO:0007156;GO:2000171;GO:0001764;GO:0010842	Y	+	FALSE	6.15385	7.94872	4.61538	6.66667	4.10256	10.5128	3.58974	2.82051	7.94872	5.64103	1.28205	5.38462	4.35897	2.5641	4.10256	6.41026	5.38462	3.84615	1.28205	5.38462	100	11.2821	10.7692	SP(Sec/SPI)	0.997655	0.002345	CS pos: 22-23. SDA-EL. Pr: 0.7785
>TRINITY_DN344_c1_g1_i4.p1 TRINITY_DN344_c1_g1~~TRINITY_DN344_c1_g1_i4.p1 ORF type:internal len:850 (-),score=128.31 TRINITY_DN344_c1_g1_i4:2-2548(-)	2.81	349.7	4	4	0	3.53	849	TRINITY_DN344_c1_g1_i4.p1	TRINITY_DN344_c1_g1_i4	LEC3_MEGRO^LEC3_MEGRO^Q:490-74,H:13-157^35.374%ID^E:1.01e-19^RecName: Full	Lectin BRA-3	LEC3_MEGRO^LEC3_MEGRO^Q:687-825,H:13-157^35.374%ID^E:4.56e-20^RecName: Full=Lectin BRA-3;^Eukaryota; Metazoa; Ecdysozoa; Arthropoda; Crustacea; Multicrustacea; Hexanauplia; Cirripedia; Thoracica; Sessilia; Balanidae; Megabalanus	.	.	.	.	GO:0030246^molecular_function^carbohydrate binding	GO:0030246^molecular_function^carbohydrate binding		Y	FALSE	FALSE	6.94935	4.47585	5.30035	5.53592	5.41814	7.06714	3.65135	2.12014	3.41578	7.30271	0.824499	6.83157	4.47585	3.298	4.71143	7.18492	8.71614	7.77385	2.12014	2.82686	100	10.8363	10.3651
>TRINITY_DN3520_c1_g1_i1.p1 TRINITY_DN3520_c1_g1~~TRINITY_DN3520_c1_g1_i1.p1 ORF type:3prime_partial len:507 (+),score=107.55 TRINITY_DN3520_c1_g1_i1:146-1663(+)	1.46	424.3	2	2	0	4.94	506	TRINITY_DN3520_c1_g1_i1.p1	TRINITY_DN3520_c1_g1_i1	LOXH1_HUMAN^LOXH1_HUMAN^Q:1070-1663,H:540-752^38.967%ID^E:1.16e-35^RecName: Full	Lipoxygenase homology domain-containing protein 1	LOXH1_HUMAN^LOXH1_HUMAN^Q:309-506,H:540-752^38.967%ID^E:5.65e-36^RecName: Full=Lipoxygenase homology domain-containing protein 1;^Eukaryota; Metazoa; Chordata; Craniata; Vertebrata; Euteleostomi; Mammalia; Eutheria; Euarchontoglires; Primates; Haplorrhini; Catarrhini; Hominidae; Homo	.	.	ENOG410XTDU^lipoxygenase homology domains 1	KEGG:hsa:125336	GO:0032420^cellular_component^stereocilium`GO:0004096^molecular_function^catalase activity`GO:0020037^molecular_function^heme binding`GO:0007605^biological_process^sensory perception of sound	GO:0032420^cellular_component^stereocilium`GO:0004096^molecular_function^catalase activity`GO:0020037^molecular_function^heme binding`GO:0007605^biological_process^sensory perception of sound	GO:0004096;GO:0020037;GO:0007605;	Y	FALSE	+	3.75494	0.592885	7.11462	6.32411	1.97628	10.4743	1.77866	2.7668	4.94071	5.5336	2.37154	3.95257	4.34783	4.74308	8.69565	12.0553	7.11462	6.917	0.592885	3.95257	100	13.4387	6.52174
>TRINITY_DN35764_c0_g1_i9.p1 TRINITY_DN35764_c0_g1~~TRINITY_DN35764_c0_g1_i9.p1 ORF type:5prime_partial len:592 (-),score=-22.52 TRINITY_DN35764_c0_g1_i9:196-1971(-)	1.93	390.6	24	2	1	2.71	591	TRINITY_DN35764_c0_g1_i9.p1	TRINITY_DN35764_c0_g1_i9	RTBS_DROME^RTBS_DROME^Q:1731-466,H:431-859^31.034%ID^E:9.58e-46^RecName: Full	Probable RNA-directed DNA polymerase from transposon BS	RTBS_DROME^RTBS_DROME^Q:81-502,H:431-859^31.034%ID^E:2.81e-46^RecName: Full=Probable RNA-directed DNA polymerase from transposon BS;^Eukaryota; Metazoa; Ecdysozoa; Arthropoda; Hexapoda; Insecta; Pterygota; Neoptera; Holometabola; Diptera; Brachycera; Muscomorpha; Ephydroidea; Drosophilidae; Drosophila; Sophophora	.	.	.	.	GO:0003964^molecular_function^RNA-directed DNA polymerase activity`GO:0006313^biological_process^transposition, DNA-mediated	GO:0003964^molecular_function^RNA-directed DNA polymerase activity`GO:0006313^biological_process^transposition, DNA-mediated	GO:0006313;	Y	FALSE	FALSE	6.09137	2.03046	5.41455	3.5533	3.89171	4.90694	1.86125	6.93739	7.61421	12.6904	1.35364	7.61421	3.5533	4.90694	5.07614	5.75296	6.42978	5.92217	1.69205	2.70728	100	8.96785	8.29103
>TRINITY_DN3611_c0_g1_i1.p1 TRINITY_DN3611_c0_g1~~TRINITY_DN3611_c0_g1_i1.p1 ORF type:complete len:378 (-),score=25.85 TRINITY_DN3611_c0_g1_i1:267-1400(-)	3.86	408.9	3	2	0	5.57	377	TRINITY_DN3611_c0_g1_i1.p1	TRINITY_DN3611_c0_g1_i1	PAC_LYSSH^PAC_LYSSH^Q:1346-405,H:3-307^31.153%ID^E:1.41e-39^RecName: Full	Penicillin acylase	PAC_LYSSH^PAC_LYSSH^Q:19-332,H:3-307^31.153%ID^E:8.9e-42^RecName: Full=Penicillin acylase;^Bacteria; Firmicutes; Bacilli; Bacillales; Bacillaceae; Lysinibacillus	tr|A0A3M6TLV8|A0A3M6TLV8_9CNID^tr|A0A3M6TLV8|A0A3M6TLV8_9CNID^Q:1693-872,H:1-248^62.044%ID^E:1.75e-113^.^.	.	.	.	GO:0008953^molecular_function^penicillin amidase activity`GO:0046677^biological_process^response to antibiotic	GO:0008953^molecular_function^penicillin amidase activity`GO:0046677^biological_process^response to antibiotic	GO:0046677;	Y	+	FALSE	5.83554	1.32626	5.30504	6.36605	4.77454	7.42706	3.18302	2.38727	3.71353	9.81432	2.91777	3.97878	4.77454	3.18302	4.77454	7.69231	5.83554	11.6711	1.32626	3.71353	100	11.6711	9.81432	SP(Sec/SPI)	0.988435	0.011565	CS pos: 19-20. ANA-CT. Pr: 0.6881
>TRINITY_DN3704_c0_g1_i15.p1 TRINITY_DN3704_c0_g1~~TRINITY_DN3704_c0_g1_i15.p1 ORF type:complete len:207 (+),score=41.09 TRINITY_DN3704_c0_g1_i15:159-779(+)	9.02	595.9	3	3	0	14.08	206	TRINITY_DN3704_c0_g1_i15.p1	TRINITY_DN3704_c0_g1_i15	CAPSL_MOUSE^CAPSL_MOUSE^Q:162-776,H:5-208^54.634%ID^E:1.34e-77^RecName: Full	Calcyphosin-like protein	CAPSL_MOUSE^CAPSL_MOUSE^Q:2-206,H:5-208^54.634%ID^E:7.32e-82^RecName: Full=Calcyphosin-like protein;^Eukaryota; Metazoa; Chordata; Craniata; Vertebrata; Euteleostomi; Mammalia; Eutheria; Euarchontoglires; Glires; Rodentia; Myomorpha; Muroidea; Muridae; Murinae; Mus; Mus	.	.	ENOG410XRMJ^calcium-dependent protein kinase	KEGG:mmu:75568	GO:0005737^cellular_component^cytoplasm`GO:0005509^molecular_function^calcium ion binding	GO:0005737^cellular_component^cytoplasm`GO:0005509^molecular_function^calcium ion binding	GO:0005509;	Y	+	FALSE	5.33981	0.485437	10.1942	7.76699	6.31068	6.79612	1.45631	3.39806	9.2233	7.28155	2.91262	2.91262	2.91262	3.39806	5.33981	11.165	3.8835	3.8835	0.970874	4.36893	100	17.9612	11.6505	OTHER	0.000432	0.999568
>TRINITY_DN3894_c0_g3_i1.p1 TRINITY_DN3894_c0_g3~~TRINITY_DN3894_c0_g3_i1.p1 ORF type:complete len:561 (+),score=102.65 TRINITY_DN3894_c0_g3_i1:100-1782(+)	2.44	403.9	2	2	0	4.82	560	TRINITY_DN3894_c0_g3_i1.p1	TRINITY_DN3894_c0_g3_i1	RO60_XENLA^RO60_XENLA^Q:133-1770,H:1-535^49.726%ID^E:0^RecName: Full	60 kDa SS-A/Ro ribonucleoprotein {ECO:0000305}	RO60_XENLA^RO60_XENLA^Q:12-557,H:1-535^49.726%ID^E:0^RecName: Full=60 kDa SS-A/Ro ribonucleoprotein {ECO:0000305};^Eukaryota; Metazoa; Chordata; Craniata; Vertebrata; Euteleostomi; Amphibia; Batrachia; Anura; Pipoidea; Pipidae; Xenopodinae; Xenopus; Xenopus	.	.	.	KEGG:xla:378688`KO:K11089	GO:0005737^cellular_component^cytoplasm`GO:0046872^molecular_function^metal ion binding`GO:0034336^molecular_function^misfolded RNA binding`GO:0030030^biological_process^cell projection organization	GO:0005737^cellular_component^cytoplasm`GO:0046872^molecular_function^metal ion binding`GO:0034336^molecular_function^misfolded RNA binding`GO:0030030^biological_process^cell projection organization	GO:0046872;GO:0034336;GO:0030030;	Y	+	FALSE	10	1.42857	3.92857	7.5	4.10714	7.32143	1.96429	5.53571	6.42857	8.92857	3.39286	3.57143	4.46429	5.53571	5	4.82143	5.35714	6.25	1.25	3.21429	100	11.4286	8.57143	OTHER	0.000698	0.999302
>TRINITY_DN3924_c0_g1_i11.p1 TRINITY_DN3924_c0_g1~~TRINITY_DN3924_c0_g1_i11.p1 ORF type:complete len:264 (-),score=29.51 TRINITY_DN3924_c0_g1_i11:742-1533(-)	9.37	508.1	10	5	1	16.35	263	TRINITY_DN3924_c0_g1_i11.p1	TRINITY_DN3924_c0_g1_i11	no blast hit	no blast hit	CO4A2_ASCSU^CO4A2_ASCSU^Q:48-141,H:1269-1368^52%ID^E:2.28e-11^RecName: Full=Collagen alpha-2(IV) chain;^Eukaryota; Metazoa; Ecdysozoa; Nematoda; Chromadorea; Rhabditida; Spirurina; Ascaridomorpha; Ascaridoidea; Ascarididae; Ascaris	.	.	.	.	.	GO:0005604^cellular_component^basement membrane`GO:0005581^cellular_component^collagen trimer`GO:0005201^molecular_function^extracellular matrix structural constituent	GO:0005581;GO:0005201	Y	+	FALSE	3.80228	3.42205	4.18251	4.18251	3.80228	15.5894	1.14068	3.42205	6.46388	10.2662	3.80228	4.56274	12.1673	1.90114	2.28137	5.70342	5.70342	4.18251	0.760456	2.6616	100	8.36502	7.22433	SP(Sec/SPI)	0.993203	0.006797	CS pos: 22-23. TAS-LP. Pr: 0.5131
>TRINITY_DN3994_c0_g1_i10.p1 TRINITY_DN3994_c0_g1~~TRINITY_DN3994_c0_g1_i10.p1 ORF type:complete len:237 (-),score=27.78 TRINITY_DN3994_c0_g1_i10:243-953(-)	16.69	824.2	4	2	0	14.41	236	TRINITY_DN3994_c0_g1_i10.p1	TRINITY_DN3994_c0_g1_i10	PRY1_YEAST^PRY1_YEAST^Q:707-249,H:166-298^41.176%ID^E:3.6e-20^RecName: Full	Protein PRY1 {ECO:0000305}	PRY1_YEAST^PRY1_YEAST^Q:84-235,H:167-298^41.447%ID^E:1.84e-22^RecName: Full=Protein PRY1 {ECO:0000305};^Eukaryota; Fungi; Dikarya; Ascomycota; Saccharomycotina; Saccharomycetes; Saccharomycetales; Saccharomycetaceae; Saccharomyces	.	.	.	KEGG:sce:YJL079C	GO:0005783^cellular_component^endoplasmic reticulum`GO:0005576^cellular_component^extracellular region`GO:0005615^cellular_component^extracellular space`GO:0000324^cellular_component^fungal-type vacuole`GO:0005635^cellular_component^nuclear envelope`GO:0015485^molecular_function^cholesterol binding`GO:0000287^molecular_function^magnesium ion binding`GO:0032934^molecular_function^sterol binding`GO…	GO:0005783^cellular_component^endoplasmic reticulum`GO:0005576^cellular_component^extracellular region`GO:0005615^cellular_component^extracellular space`GO:0000324^cellular_component^fungal-type vacuole`GO:0005635^cellular_component^nuclear envelope`GO:0015485^molecular_function^cholesterol binding`GO:0000287^molecular_function^magnesium ion binding`GO:0032934^molecular_function^sterol binding`GO…	GO:0005576;GO:0005615;GO:0000324;GO:0005635;GO:0015485;GO:0015485;GO:0000287;GO:0032934;GO:0015918;	Y	+	FALSE	8.47458	3.38983	6.35593	5.9322	2.9661	11.8644	2.9661	3.38983	2.9661	5.9322	0.847458	4.66102	3.38983	5.9322	2.11864	7.62712	6.35593	7.62712	2.11864	5.08475	100	12.2881	10.1695	SP(Sec/SPI)	0.9981	0.0019	CS pos: 23-24. VKA-VE. Pr: 0.9684
>TRINITY_DN4124_c0_g2_i1.p1 TRINITY_DN4124_c0_g2~~TRINITY_DN4124_c0_g2_i1.p1 ORF type:3prime_partial len:414 (-),score=68.80 TRINITY_DN4124_c0_g2_i1:3-1241(-)	17.92	683	4	3	1	10.17	413	TRINITY_DN4124_c0_g2_i1.p1	TRINITY_DN4124_c0_g2_i1	CAFF_RIFPA^CAFF_RIFPA^Q:1853-84,H:135-700^40.282%ID^E:4e-36^RecName: Full	Fibril-forming collagen alpha chain	CO1A2_RAT^CO1A2_RAT^Q:1-413,H:132-565^42.438%ID^E:2.87e-43^RecName: Full=Collagen alpha-2(I) chain;^Eukaryota; Metazoa; Chordata; Craniata; Vertebrata; Euteleostomi; Mammalia; Eutheria; Euarchontoglires; Glires; Rodentia; Myomorpha; Muroidea; Muridae; Murinae; Rattus	.	.	ENOG410ZZWR^collagen, type	KEGG:rno:84352`KO:K06236	GO:0005581^cellular_component^collagen trimer`GO:0005576^cellular_component^extracellular region	GO:0005581^cellular_component^collagen trimer`GO:0005584^cellular_component^collagen type I trimer`GO:0031012^cellular_component^extracellular matrix`GO:0005576^cellular_component^extracellular region`GO:0005615^cellular_component^extracellular space`GO:0005201^molecular_function^extracellular matrix structural constituent`GO:0042802^molecular_function^identical protein binding`GO:0046872^molecul…	GO:0005584;GO:0031012;GO:0005576;GO:0005615;GO:0005201;GO:0005201;GO:0042802;GO:0046872;GO:0048407;GO:0002020;GO:0030674;GO:0046332;GO:0001568;GO:0030282;GO:0071230;GO:0071310;GO:0071300;GO:0097067;GO:0030199;GO:0032963;GO:0085029;GO:0030198;GO:0070208;GO:0008217;GO:0071873;GO:0007266;GO:0001501;GO:0043589;GO:0007179;	Y	FALSE	+	6.05327	0	6.2954	4.84262	0.726392	34.3826	0.242131	2.90557	3.63196	3.1477	0.726392	1.45278	9.68523	4.11622	7.74818	6.77966	4.35835	2.90557	0	0	100	11.138	0.726392
>TRINITY_DN4164_c0_g2_i1.p1 TRINITY_DN4164_c0_g2~~TRINITY_DN4164_c0_g2_i1.p1 ORF type:5prime_partial len:540 (-),score=158.04 TRINITY_DN4164_c0_g2_i1:256-1875(-)	8.87	728.9	6	5	0	6.49	539	TRINITY_DN4164_c0_g2_i1.p1	TRINITY_DN4164_c0_g2_i1	TYB_CAEEL^TYB_CAEEL^Q:1629-1261,H:23-139^41.6%ID^E:7.85e-11^RecName: Full	Thymosin beta {ECO:0000305}	TYB_CAEEL^TYB_CAEEL^Q:83-205,H:23-139^41.6%ID^E:5.56e-11^RecName: Full=Thymosin beta {ECO:0000305};^Eukaryota; Metazoa; Ecdysozoa; Nematoda; Chromadorea; Rhabditida; Rhabditina; Rhabditomorpha; Rhabditoidea; Rhabditidae; Peloderinae; Caenorhabditis	.	.	ENOG410Y3I4^thymosin beta	KEGG:cel:CELE_F08F1.8	GO:0005938^cellular_component^cell cortex`GO:0030054^cellular_component^cell junction`GO:0005856^cellular_component^cytoskeleton`GO:0005829^cellular_component^cytosol`GO:0003785^molecular_function^actin monomer binding`GO:0007015^biological_process^actin filament organization	GO:0005938^cellular_component^cell cortex`GO:0030054^cellular_component^cell junction`GO:0005856^cellular_component^cytoskeleton`GO:0005829^cellular_component^cytosol`GO:0003785^molecular_function^actin monomer binding`GO:0007015^biological_process^actin filament organization	GO:0030054;GO:0005856;GO:0005829;GO:0003785;GO:0007015;GO:0007015	Y	FALSE	FALSE	5.75139	0.185529	5.93692	13.9147	2.96846	1.85529	2.96846	2.78293	12.4304	7.97774	1.85529	3.52505	5.93692	4.82375	4.63822	6.67904	8.90538	6.30798	0	0.556586	100	19.8516	3.52505
>TRINITY_DN41751_c1_g1_i1.p1 TRINITY_DN41751_c1_g1~~TRINITY_DN41751_c1_g1_i1.p1 ORF type:complete len:367 (-),score=115.89 TRINITY_DN41751_c1_g1_i1:773-1873(-)	8.94	594.8	2	2	0	6.28	366	TRINITY_DN41751_c1_g1_i1.p1	TRINITY_DN41751_c1_g1_i1	ZPP_ACRMI^ZPP_ACRMI^Q:1792-776,H:67-414^49.138%ID^E:1.8e-90^RecName: Full	ZP domain-containing protein {ECO:0000303|PubMed:23765379}	ZPP_ACRMI^ZPP_ACRMI^Q:28-366,H:67-414^49.713%ID^E:2.4e-110^RecName: Full=ZP domain-containing protein {ECO:0000303|PubMed:23765379};^Eukaryota; Metazoa; Cnidaria; Anthozoa; Hexacorallia; Scleractinia; Astrocoeniina; Acroporidae; Acropora	.	ExpAA=22.96^PredHel=1^Topology=o320-342i	.	.	GO:0016021^cellular_component^integral component of membrane	GO:0016021^cellular_component^integral component of membrane		Y	+	FALSE	7.65027	2.73224	8.19672	4.37158	4.09836	4.09836	1.36612	4.37158	6.01093	9.28962	3.55191	4.37158	4.37158	5.19126	4.09836	8.19672	6.01093	7.37705	0.546448	4.09836	100	12.5683	8.74317	SP(Sec/SPI)	0.989553	0.010447	CS pos: 20-21. NTA-DN. Pr: 0.7975
>TRINITY_DN42621_c0_g1_i1.p1 TRINITY_DN42621_c0_g1~~TRINITY_DN42621_c0_g1_i1.p1 ORF type:internal len:225 (+),score=21.32 TRINITY_DN42621_c0_g1_i1:3-674(+)	2.88	426.4	5	3	1	16.07	224	TRINITY_DN42621_c0_g1_i1.p1	TRINITY_DN42621_c0_g1_i1	HMCN1_MOUSE^HMCN1_MOUSE^Q:6-674,H:3961-4144^30.357%ID^E:4.07e-24^RecName: Full	Hemicentin-1 {ECO:0000312|MGI:MGI:2685047}	HMCN1_MOUSE^HMCN1_MOUSE^Q:2-224,H:3961-4144^30.357%ID^E:3.67e-24^RecName: Full=Hemicentin-1 {ECO:0000312|MGI:MGI:2685047};^Eukaryota; Metazoa; Chordata; Craniata; Vertebrata; Euteleostomi; Mammalia; Eutheria; Euarchontoglires; Glires; Rodentia; Myomorpha; Muroidea; Muridae; Murinae; Mus; Mus	.	.	ENOG410ZN3C^von Willebrand factor A domain containing 7	KEGG:mmu:545370`KO:K17341	GO:0005604^cellular_component^basement membrane`GO:0005938^cellular_component^cell cortex`GO:0030054^cellular_component^cell junction`GO:0032154^cellular_component^cleavage furrow`GO:0062023^cellular_component^collagen-containing extracellular matrix`GO:0005576^cellular_component^extracellular region`GO:0005509^molecular_function^calcium ion binding`GO:0050839^molecular_function^cell adhesion mol…	GO:0005604^cellular_component^basement membrane`GO:0005938^cellular_component^cell cortex`GO:0030054^cellular_component^cell junction`GO:0032154^cellular_component^cleavage furrow`GO:0062023^cellular_component^collagen-containing extracellular matrix`GO:0005576^cellular_component^extracellular region`GO:0005509^molecular_function^calcium ion binding`GO:0050839^molecular_function^cell adhesion mol…	GO:0005938;GO:0030054;GO:0032154;GO:0062023;GO:0005576;GO:0005576;GO:0005509;GO:0050839;GO:0042803;GO:0038023;GO:0007049;GO:0051301;GO:0007157;GO:0007156;GO:0009617;	Y	FALSE	FALSE	7.14286	1.78571	3.57143	8.48214	2.67857	8.03571	1.78571	8.92857	2.67857	2.23214	0.892857	3.57143	4.91071	2.23214	4.01786	16.5179	9.82143	8.03571	0.892857	1.78571	100	12.0536	5.35714
>TRINITY_DN43166_c0_g2_i4.p1 TRINITY_DN43166_c0_g2~~TRINITY_DN43166_c0_g2_i4.p1 ORF type:complete len:604 (+),score=79.40 TRINITY_DN43166_c0_g2_i4:482-2293(+)	1.07	489.5	14	4	2	3.32	603	TRINITY_DN43166_c0_g2_i4.p1	TRINITY_DN43166_c0_g2_i4	I2BP1_DANRE^I2BP1_DANRE^Q:1061-2287,H:232-604^37.857%ID^E:2.06e-53^RecName: Full	Interferon regulatory factor 2-binding protein 1	I2BLB_XENLA^I2BLB_XENLA^Q:194-602,H:266-689^39.683%ID^E:2.66e-74^RecName: Full=Interferon regulatory factor 2-binding protein-like B;^Eukaryota; Metazoa; Chordata; Craniata; Vertebrata; Euteleostomi; Amphibia; Batrachia; Anura; Pipoidea; Pipidae; Xenopodinae; Xenopus; Xenopus	.	.	ENOG410Z1AW^Interferon regulatory factor 2 binding	KEGG:xla:379718`KO:K22383	GO:0005634^cellular_component^nucleus`GO:0001228^molecular_function^DNA-binding transcription activator activity, RNA polymerase II-specific`GO:0000977^molecular_function^RNA polymerase II regulatory region sequence-specific DNA binding	GO:0005634^cellular_component^nucleus`GO:0046872^molecular_function^metal ion binding	GO:0046872;	Y	+	FALSE	5.80431	2.32172	3.81426	6.96517	2.98507	6.96517	3.48259	3.81426	4.64345	6.96517	3.81426	5.14096	8.29187	4.80929	7.62852	10.1161	4.31177	5.47264	0.829187	1.82421	100	10.7794	5.63847	OTHER	0.001329	0.998671
>TRINITY_DN4573_c0_g1_i2.p2 TRINITY_DN4573_c0_g1~~TRINITY_DN4573_c0_g1_i2.p2 ORF type:complete len:152 (+),score=63.05 TRINITY_DN4573_c0_g1_i2:171-626(+)	1.93	480.1	3	2	0	8.61	151	TRINITY_DN4573_c0_g1_i2.p2	TRINITY_DN4573_c0_g1_i2	CML1_ORYSI^CML1_ORYSI^Q:171-674,H:1-180^43.243%ID^E:1.68e-39^RecName: Full	Calmodulin-like protein 1	CALM_AGABI^CALM_AGABI^Q:1-149,H:1-145^47.333%ID^E:6.89e-41^RecName: Full=Calmodulin;^Eukaryota; Fungi; Dikarya; Basidiomycota; Agaricomycotina; Agaricomycetes; Agaricomycetidae; Agaricales; Agaricaceae; Agaricus	.	.	COG5126^Calcium-binding protein	.	GO:0016020^cellular_component^membrane`GO:0005509^molecular_function^calcium ion binding`GO:0019722^biological_process^calcium-mediated signaling	GO:0005509^molecular_function^calcium ion binding`GO:0019722^biological_process^calcium-mediated signaling	GO:0019722;	Y	+	FALSE	7.28477	1.3245	9.27152	11.2583	5.29801	5.96026	0	6.62252	9.93377	7.94702	4.63576	2.64901	0.662252	5.29801	2.64901	8.60927	5.96026	3.97351	0.662252	0	100	20.5298	5.96026	OTHER	0.000276	0.999724
>TRINITY_DN46568_c0_g1_i1.p1 TRINITY_DN46568_c0_g1~~TRINITY_DN46568_c0_g1_i1.p1 ORF type:internal len:276 (+),score=135.54 TRINITY_DN46568_c0_g1_i1:1-825(+)	10.51	631.4	3	3	1	7.27	275	TRINITY_DN46568_c0_g1_i1.p1	TRINITY_DN46568_c0_g1_i1	no blast hit	no blast hit	SFP4_BOVIN^SFP4_BOVIN^Q:42-163,H:94-183^33.065%ID^E:4.5e-12^RecName: Full=Seminal plasma protein BSP-30 kDa;^Eukaryota; Metazoa; Chordata; Craniata; Vertebrata; Euteleostomi; Mammalia; Eutheria; Laurasiatheria; Artiodactyla; Ruminantia; Pecora; Bovidae; Bovinae; Bos	.	.	ENOG410XQ5D^matrix metallopeptidase	KEGG:bta:317699	.	GO:0009986^cellular_component^cell surface`GO:0005615^cellular_component^extracellular space`GO:0008201^molecular_function^heparin binding`GO:0033700^biological_process^phospholipid efflux`GO:1902492^biological_process^positive regulation of sperm capacitation`GO:0007338^biological_process^single fertilization`GO:0048240^biological_process^sperm capacitation	GO:0005615;GO:0008201;GO:0033700;GO:1902492;GO:0007338;GO:0007338;GO:0048240;	Y	FALSE	FALSE	3.63636	6.54545	5.45455	36	3.63636	7.63636	1.45455	0.363636	10.5455	0.727273	0	0.727273	2.18182	0.363636	0.363636	5.45455	4.72727	5.09091	2.18182	2.90909	100	41.4545	8.72727
>TRINITY_DN4697_c1_g1_i2.p1 TRINITY_DN4697_c1_g1~~TRINITY_DN4697_c1_g1_i2.p1 ORF type:complete len:404 (+),score=77.17 TRINITY_DN4697_c1_g1_i2:107-1213(+)	10.71	622.9	6	4	1	9.51	368	TRINITY_DN4697_c1_g1_i2.p1	TRINITY_DN4697_c1_g1_i2	ZPP_ACRMI^ZPP_ACRMI^Q:203-949,H:67-321^28.794%ID^E:7.94e-27^RecName: Full	ZP domain-containing protein {ECO:0000303|PubMed:23765379}	ZPP_ACRMI^ZPP_ACRMI^Q:68-395,H:67-398^26.706%ID^E:2.08e-30^RecName: Full=ZP domain-containing protein {ECO:0000303|PubMed:23765379};^Eukaryota; Metazoa; Cnidaria; Anthozoa; Hexacorallia; Scleractinia; Astrocoeniina; Acroporidae; Acropora	.	ExpAA=22.87^PredHel=1^Topology=o362-384i	.	.	GO:0016021^cellular_component^integral component of membrane	GO:0016021^cellular_component^integral component of membrane		Y	+	FALSE	8.96739	3.26087	7.06522	4.07609	3.53261	5.97826	1.63043	5.43478	4.07609	6.52174	2.98913	3.26087	5.97826	4.34783	7.6087	7.88043	5.97826	7.33696	0	4.07609	100	11.1413	7.6087	OTHER	0.001205	0.998795
>TRINITY_DN47584_c0_g1_i1.p1 TRINITY_DN47584_c0_g1~~TRINITY_DN47584_c0_g1_i1.p1 ORF type:internal len:183 (+),score=6.05 TRINITY_DN47584_c0_g1_i1:2-547(+)	2.05	397.3	6	2	1	7.14	182	TRINITY_DN47584_c0_g1_i1.p1	TRINITY_DN47584_c0_g1_i1	no blast hit	no blast hit	.	.	.	.	.	.	.		Y	FALSE	FALSE	3.2967	0	7.14286	7.14286	0.549451	7.14286	2.1978	3.2967	7.14286	5.49451	2.1978	1.0989	12.6374	4.94505	10.989	13.1868	7.14286	4.3956	0	0	100	14.2857	0.549451
>TRINITY_DN48421_c0_g1_i1.p1 TRINITY_DN48421_c0_g1~~TRINITY_DN48421_c0_g1_i1.p1 ORF type:complete len:183 (+),score=22.49 TRINITY_DN48421_c0_g1_i1:59-550(+)	3.57	413.3	5	4	0	22.09	163	TRINITY_DN48421_c0_g1_i1.p1	TRINITY_DN48421_c0_g1_i1	RRAAH_ALKEH^RRAAH_ALKEH^Q:68-514,H:6-154^56.376%ID^E:3.91e-47^RecName: Full	Putative 4-hydroxy-4-methyl-2-oxoglutarate aldolase	RRAAH_PSEMY^RRAAH_PSEMY^Q:24-178,H:7-161^54.194%ID^E:1.63e-61^RecName: Full=Putative 4-hydroxy-4-methyl-2-oxoglutarate aldolase;^Bacteria; Proteobacteria; Gammaproteobacteria; Pseudomonadales; Pseudomonadaceae; Pseudomonas	.	.	COG0684^Globally modulates RNA abundance by binding to RNase E (Rne) and regulating its endonucleolytic activity. Can modulate Rne action in a substrate-dependent manner by altering the composition of the degradosome. Modulates RNA-binding and helicase activities of the degradosome (By similarity)	KEGG:pmy:Pmen_2087`KO:K02553	GO:0047443^molecular_function^4-hydroxy-4-methyl-2-oxoglutarate aldolase activity`GO:0046872^molecular_function^metal ion binding`GO:0008948^molecular_function^oxaloacetate decarboxylase activity`GO:0008428^molecular_function^ribonuclease inhibitor activity`GO:0051252^biological_process^regulation of RNA metabolic process	GO:0047443^molecular_function^4-hydroxy-4-methyl-2-oxoglutarate aldolase activity`GO:0046872^molecular_function^metal ion binding`GO:0008948^molecular_function^oxaloacetate decarboxylase activity`GO:0008428^molecular_function^ribonuclease inhibitor activity`GO:0051252^biological_process^regulation of RNA metabolic process	GO:0046872;GO:0008948;GO:0008428;GO:0051252	Y	+	FALSE	7.97546	1.22699	8.58896	3.68098	3.68098	12.8834	1.22699	3.68098	9.20245	7.97546	3.06748	1.84049	4.90798	1.84049	3.68098	5.52147	3.06748	11.6564	0.613497	3.68098	100	12.2699	7.97546	OTHER	0.001038	0.998962
>TRINITY_DN4924_c0_g1_i11.p1 TRINITY_DN4924_c0_g1~~TRINITY_DN4924_c0_g1_i11.p1 ORF type:complete len:287 (-),score=57.56 TRINITY_DN4924_c0_g1_i11:313-1173(-)	5.92	529.5	2	2	0	9.79	286	TRINITY_DN4924_c0_g1_i11.p1	TRINITY_DN4924_c0_g1_i11	YBOX1_XENLA^YBOX1_XENLA^Q:1083-859,H:43-117^80%ID^E:3.03e-37^RecName: Full	Y-box-binding protein 1 {ECO:0000250|UniProtKB:P67809}	YBOXH_APLCA^YBOXH_APLCA^Q:6-113,H:14-121^70.37%ID^E:1.08e-49^RecName: Full=Y-box factor homolog;^Eukaryota; Metazoa; Lophotrochozoa; Mollusca; Gastropoda; Heterobranchia; Euthyneura; Euopisthobranchia; Aplysiida; Aplysioidea; Aplysiidae; Aplysia	.	.	.	.	GO:0005737^cellular_component^cytoplasm`GO:0070062^cellular_component^extracellular exosome`GO:0071204^cellular_component^histone pre-mRNA 3'end processing complex`GO:0062153^molecular_function^C5-methylcytidine-containing RNA binding`GO:0003677^molecular_function^DNA binding`GO:0035198^molecular_function^miRNA binding`GO:0003723^molecular_function^RNA binding`GO:0048598^biological_process^embryo…	GO:0005634^cellular_component^nucleus`GO:0003723^molecular_function^RNA binding	GO:0003723;	Y	+	FALSE	4.54545	0	6.64336	14.3357	2.44755	10.1399	1.04895	1.74825	6.99301	0.699301	0.699301	5.94406	7.34266	3.4965	16.7832	4.8951	4.1958	4.54545	0.34965	3.14685	100	20.979	5.94406	OTHER	0.001735	0.998265
>TRINITY_DN5142_c0_g1_i1.p1 TRINITY_DN5142_c0_g1~~TRINITY_DN5142_c0_g1_i1.p1 ORF type:5prime_partial len:294 (+),score=46.82 TRINITY_DN5142_c0_g1_i1:1-882(+)	2.1	396.8	3	2	1	7.17	293	TRINITY_DN5142_c0_g1_i1.p1	TRINITY_DN5142_c0_g1_i1	AT1B1_RABIT^AT1B1_RABIT^Q:106-837,H:15-290^32.982%ID^E:1.66e-22^RecName: Full	Sodium/potassium-transporting ATPase subunit beta-1	AT1B1_RABIT^AT1B1_RABIT^Q:36-279,H:15-290^32.982%ID^E:5.09e-29^RecName: Full=Sodium/potassium-transporting ATPase subunit beta-1;^Eukaryota; Metazoa; Chordata; Craniata; Vertebrata; Euteleostomi; Mammalia; Eutheria; Euarchontoglires; Glires; Lagomorpha; Leporidae; Oryctolagus	.	ExpAA=22.61^PredHel=1^Topology=i56-78o	ENOG411150A^ATPase, Na K transporting, beta	KEGG:ocu:100008749`KO:K01540	GO:0042383^cellular_component^sarcolemma`GO:0005890^cellular_component^sodium:potassium-exchanging ATPase complex`GO:0051117^molecular_function^ATPase binding`GO:0050998^molecular_function^nitric-oxide synthase binding`GO:0007155^biological_process^cell adhesion`GO:0006813^biological_process^potassium ion transport`GO:0006814^biological_process^sodium ion transport	GO:0042383^cellular_component^sarcolemma`GO:0005890^cellular_component^sodium:potassium-exchanging ATPase complex`GO:0051117^molecular_function^ATPase binding`GO:0050998^molecular_function^nitric-oxide synthase binding`GO:0007155^biological_process^cell adhesion`GO:0006813^biological_process^potassium ion transport`GO:0006814^biological_process^sodium ion transport	GO:0005890;GO:0051117;GO:0050998;GO:0007155;GO:0006813;GO:0006813;GO:0006814;	Y	FALSE	FALSE	8.53242	2.38908	5.11945	7.84983	6.14334	9.21502	1.36519	4.09556	9.55631	5.80205	2.38908	4.43686	5.46075	2.04778	4.09556	3.75427	4.43686	6.82594	1.36519	5.11945	100	12.9693	12.628
>TRINITY_DN51623_c0_g1_i1.p1 TRINITY_DN51623_c0_g1~~TRINITY_DN51623_c0_g1_i1.p1 ORF type:complete len:445 (-),score=137.33 TRINITY_DN51623_c0_g1_i1:1451-2785(-)	12.03	736	4	4	1	14.41	444	TRINITY_DN51623_c0_g1_i1.p1	TRINITY_DN51623_c0_g1_i1	VILI_HUMAN^VILI_HUMAN^Q:2821-1454,H:368-827^42.161%ID^E:1.83e-106^RecName: Full	Villin-1	VILI_HUMAN^VILI_HUMAN^Q:9-444,H:389-827^42%ID^E:4.57e-113^RecName: Full=Villin-1;^Eukaryota; Metazoa; Chordata; Craniata; Vertebrata; Euteleostomi; Mammalia; Eutheria; Euarchontoglires; Primates; Haplorrhini; Catarrhini; Hominidae; Homo	tr|A0A2B4R7J7|A0A2B4R7J7_STYPI^tr|A0A2B4R7J7|A0A2B4R7J7_STYPI^Q:83-511,H:1248-1386^59.441%ID^E:1.95e-49^.^.	.	ENOG410XR0A^capping protein (actin filament) gelsolin-like	KEGG:hsa:7429`KO:K05761	GO:0032432^cellular_component^actin filament bundle`GO:0005903^cellular_component^brush border`GO:0005737^cellular_component^cytoplasm`GO:0070062^cellular_component^extracellular exosome`GO:0030175^cellular_component^filopodium`GO:0032433^cellular_component^filopodium tip`GO:0030027^cellular_component^lamellipodium`GO:0005902^cellular_component^microvillus`GO:0005886^cellular_component^plasma mem…	GO:0032432^cellular_component^actin filament bundle`GO:0005903^cellular_component^brush border`GO:0005737^cellular_component^cytoplasm`GO:0070062^cellular_component^extracellular exosome`GO:0030175^cellular_component^filopodium`GO:0032433^cellular_component^filopodium tip`GO:0030027^cellular_component^lamellipodium`GO:0005902^cellular_component^microvillus`GO:0005886^cellular_component^plasma mem…	GO:0005903;GO:0005737;GO:0070062;GO:0030175;GO:0032433;GO:0032433;GO:0030027;GO:0005902;GO:0005886;GO:0001726;GO:0051015;GO:0005509;GO:0043027;GO:0042802;GO:0035727;GO:0005546;GO:0042803;GO:0051693;GO:0030042;GO:0030041;GO:0051014;GO:0045010;GO:0051016;GO:0071364;GO:0035729;GO:0060327;GO:0007173;GO:0030855;GO:0001951;GO:0032233;GO:0030836;GO:0030335;GO:0010634;GO:2000394;GO:0040018;GO:1903078;GO:…	Y	+	FALSE	7.20721	0.900901	7.65766	9.00901	4.95495	6.30631	2.25225	2.25225	8.10811	7.43243	2.47748	3.37838	4.72973	5.18018	5.40541	5.18018	3.37838	8.78378	1.57658	3.82883	100	16.6667	10.3604	OTHER	0.001559	0.998441
>TRINITY_DN530_c2_g1_i19.p1 TRINITY_DN530_c2_g1~~TRINITY_DN530_c2_g1_i19.p1 ORF type:complete len:1342 (-),score=300.66 TRINITY_DN530_c2_g1_i19:165-4190(-)	1.7	451.1	6	3	1	2.68	1341	TRINITY_DN530_c2_g1_i19.p1	TRINITY_DN530_c2_g1_i19	OTUD4_HUMAN^OTUD4_HUMAN^Q:4465-5367,H:14-294^44.918%ID^E:7.38e-70^RecName: Full	OTU domain-containing protein 4	OTUD4_HUMAN^OTUD4_HUMAN^Q:15-315,H:14-294^44.918%ID^E:3.74e-72^RecName: Full=OTU domain-containing protein 4;^Eukaryota; Metazoa; Chordata; Craniata; Vertebrata; Euteleostomi; Mammalia; Eutheria; Euarchontoglires; Primates; Haplorrhini; Catarrhini; Hominidae; Homo	.	.	ENOG410XNYW^OTU domain containing	KEGG:hsa:54726`KO:K13718	GO:0005829^cellular_component^cytosol`GO:0005634^cellular_component^nucleus`GO:0061578^molecular_function^Lys63-specific deubiquitinase activity`GO:0060090^molecular_function^molecular adaptor activity`GO:0003723^molecular_function^RNA binding`GO:0004843^molecular_function^thiol-dependent ubiquitin-specific protease activity`GO:0045087^biological_process^innate immune response`GO:2000660^biologic…	GO:0005829^cellular_component^cytosol`GO:0005634^cellular_component^nucleus`GO:0061578^molecular_function^Lys63-specific deubiquitinase activity`GO:0060090^molecular_function^molecular adaptor activity`GO:0003723^molecular_function^RNA binding`GO:0004843^molecular_function^thiol-dependent ubiquitin-specific protease activity`GO:0045087^biological_process^innate immune response`GO:2000660^biologic…	GO:0005634;GO:0061578;GO:0060090;GO:0003723;GO:0004843;GO:0004843;GO:0045087;GO:2000660;GO:0034122;GO:1901537;GO:0071108;GO:0070536;GO:1903093;	Y	+	FALSE	8.7994	0.59657	5.29456	7.00969	2.90828	7.82998	2.60999	1.93885	7.53169	5.07084	2.01342	4.17599	9.91797	6.71141	5.51827	7.23341	5.21999	6.18941	0.521999	2.90828	100	12.3043	6.33855	OTHER	0.002201	0.997799
>TRINITY_DN53645_c0_g1_i1.p1 TRINITY_DN53645_c0_g1~~TRINITY_DN53645_c0_g1_i1.p1 ORF type:complete len:458 (-),score=83.27 TRINITY_DN53645_c0_g1_i1:159-1532(-)	0.92	303.8	2	2	0	4.6	457	TRINITY_DN53645_c0_g1_i1.p1	TRINITY_DN53645_c0_g1_i1	DNSL3_HUMAN^DNSL3_HUMAN^Q:1424-627,H:15-284^47.407%ID^E:1.99e-78^RecName: Full	Deoxyribonuclease gamma	DNSL3_HUMAN^DNSL3_HUMAN^Q:37-326,H:15-303^45.578%ID^E:1.05e-79^RecName: Full=Deoxyribonuclease gamma;^Eukaryota; Metazoa; Chordata; Craniata; Vertebrata; Euteleostomi; Mammalia; Eutheria; Euarchontoglires; Primates; Haplorrhini; Catarrhini; Hominidae; Homo	.	.	ENOG410ZR9A^Deoxyribonuclease	KEGG:hsa:1776`KO:K11995	GO:0005783^cellular_component^endoplasmic reticulum`GO:0005576^cellular_component^extracellular region`GO:0005634^cellular_component^nucleus`GO:0005509^molecular_function^calcium ion binding`GO:0004536^molecular_function^deoxyribonuclease activity`GO:0004530^molecular_function^deoxyribonuclease I activity`GO:0003677^molecular_function^DNA binding`GO:0006309^biological_process^apoptotic DNA fragme…	GO:0005783^cellular_component^endoplasmic reticulum`GO:0005576^cellular_component^extracellular region`GO:0005634^cellular_component^nucleus`GO:0005509^molecular_function^calcium ion binding`GO:0004536^molecular_function^deoxyribonuclease activity`GO:0004530^molecular_function^deoxyribonuclease I activity`GO:0003677^molecular_function^DNA binding`GO:0006309^biological_process^apoptotic DNA fragme…	GO:0005576;GO:0005634;GO:0005509;GO:0004536;GO:0004530;GO:0004530;GO:0003677;GO:0006309;GO:0006308;GO:0000737;GO:0006259;GO:0002283;GO:0010623;GO:0002673;GO:0070948;	Y	+	FALSE	7.87746	1.53173	6.78337	4.814	5.03282	5.03282	0.875274	5.68928	5.25164	9.19037	2.18818	3.06346	2.62582	3.28228	7.65864	7.87746	6.56455	10.0656	0.875274	3.71991	100	11.5974	9.62801	SP(Sec/SPI)	0.933046	0.066954	CS pos: 18-19. ITG-TT. Pr: 0.4010
>TRINITY_DN5554_c0_g1_i2.p1 TRINITY_DN5554_c0_g1~~TRINITY_DN5554_c0_g1_i2.p1 ORF type:5prime_partial len:449 (-),score=118.46 TRINITY_DN5554_c0_g1_i2:1517-2863(-)	5.39	472.5	7	6	1	10.27	448	TRINITY_DN5554_c0_g1_i2.p1	TRINITY_DN5554_c0_g1_i2	no blast hit	no blast hit	PAIRB_RAT^PAIRB_RAT^Q:197-359,H:190-358^34.444%ID^E:2.01e-13^RecName: Full=Plasminogen activator inhibitor 1 RNA-binding protein;^Eukaryota; Metazoa; Chordata; Craniata; Vertebrata; Euteleostomi; Mammalia; Eutheria; Euarchontoglires; Glires; Rodentia; Myomorpha; Muroidea; Muridae; Murinae; Rattus	tr|A0A2B4SXK5|A0A2B4SXK5_STYPI^tr|A0A2B4SXK5|A0A2B4SXK5_STYPI^Q:2763-703,H:1-689^72.464%ID^E:0^.^.	.	ENOG410YBHR^SERPINE1 mRNA binding protein 1	KEGG:rno:246303`KO:K13199	.	GO:0005737^cellular_component^cytoplasm`GO:0005829^cellular_component^cytosol`GO:0005634^cellular_component^nucleus`GO:0048471^cellular_component^perinuclear region of cytoplasm`GO:0005886^cellular_component^plasma membrane`GO:0003730^molecular_function^mRNA 3'-UTR binding`GO:0032183^molecular_function^SUMO binding`GO:0030578^biological_process^PML body organization`GO:0042981^biological_process^…	GO:0005829;GO:0005634;GO:0048471;GO:0005886;GO:0003730;GO:0003730;GO:0032183;GO:0030578;GO:0042981;	Y	FALSE	FALSE	4.6875	0.669643	7.58929	11.8304	3.125	17.8571	0.446429	3.57143	9.15179	2.23214	0.669643	3.125	4.46429	2.23214	12.5	7.14286	2.67857	4.24107	0.892857	0.892857	100	19.4196	4.91071
>TRINITY_DN56331_c0_g1_i1.p1 TRINITY_DN56331_c0_g1~~TRINITY_DN56331_c0_g1_i1.p1 ORF type:complete len:192 (+),score=23.71 TRINITY_DN56331_c0_g1_i1:129-704(+)	11.11	809.1	23	4	1	7.33	191	TRINITY_DN56331_c0_g1_i1.p1	TRINITY_DN56331_c0_g1_i1	HAAF_LIMPO^HAAF_LIMPO^Q:129-695,H:1-168^30.208%ID^E:1.54e-19^RecName: Full	Hemagglutinin/amebocyte aggregation factor	HAAF_LIMPO^HAAF_LIMPO^Q:1-189,H:1-168^30.208%ID^E:1.72e-21^RecName: Full=Hemagglutinin/amebocyte aggregation factor;^Eukaryota; Metazoa; Ecdysozoa; Arthropoda; Chelicerata; Merostomata; Xiphosura; Limulidae; Limulus	.	.	.	.	GO:0005576^cellular_component^extracellular region	GO:0005576^cellular_component^extracellular region		Y	+	FALSE	4.71204	5.2356	10.9948	6.28272	5.75916	3.66492	4.71204	7.32984	2.6178	4.18848	1.57068	4.71204	3.66492	2.6178	5.75916	10.9948	3.14136	6.28272	1.04712	4.71204	100	17.2775	11.5183	SP(Sec/SPI)	0.998946	0.001054	CS pos: 19-20. AHA-AP. Pr: 0.9254
>TRINITY_DN570_c0_g4_i1.p1 TRINITY_DN570_c0_g4~~TRINITY_DN570_c0_g4_i1.p1 ORF type:3prime_partial len:500 (+),score=78.14 TRINITY_DN570_c0_g4_i1:211-1707(+)	26.35	598.7	16	11	3	16.63	499	TRINITY_DN570_c0_g4_i1.p1	TRINITY_DN570_c0_g4_i1	CO6A4_MOUSE^CO6A4_MOUSE^Q:283-879,H:842-1022^31.841%ID^E:2.98e-12^RecName: Full	Collagen alpha-4(VI) chain	COBA2_MOUSE^COBA2_MOUSE^Q:235-499,H:567-838^41.667%ID^E:9.3e-22^RecName: Full=Collagen alpha-2(XI) chain;^Eukaryota; Metazoa; Chordata; Craniata; Vertebrata; Euteleostomi; Mammalia; Eutheria; Euarchontoglires; Glires; Rodentia; Myomorpha; Muroidea; Muridae; Murinae; Mus; Mus	.	.	ENOG410ZT70^NA	KEGG:mmu:12815`KO:K19721	GO:0005581^cellular_component^collagen trimer`GO:0062023^cellular_component^collagen-containing extracellular matrix`GO:0031012^cellular_component^extracellular matrix`GO:0005576^cellular_component^extracellular region`GO:0032991^cellular_component^protein-containing complex`GO:0005518^molecular_function^collagen binding`GO:0007155^biological_process^cell adhesion`GO:0030198^biological_process^ex…	GO:0005581^cellular_component^collagen trimer`GO:0062023^cellular_component^collagen-containing extracellular matrix`GO:0031012^cellular_component^extracellular matrix`GO:0005615^cellular_component^extracellular space`GO:0005201^molecular_function^extracellular matrix structural constituent`GO:0046872^molecular_function^metal ion binding`GO:0051216^biological_process^cartilage development`GO:0002…	GO:0062023;GO:0031012;GO:0005615;GO:0005201;GO:0046872;GO:0046872;GO:0051216;GO:0002062;GO:0030199;GO:0030198;GO:0001649;GO:0060021;GO:0007605;GO:0001501;GO:0048705;GO:0060023;GO:0001894;	Y	FALSE	+	8.41683	0.801603	5.61122	5.81162	2.80561	21.6433	0.400802	4.20842	2.60521	5.41082	2.20441	2.00401	11.4228	2.80561	6.21242	5.81162	5.61122	5.61122	0	0.601202	100	11.4228	3.40681
>TRINITY_DN5715_c0_g1_i10.p1 TRINITY_DN5715_c0_g1~~TRINITY_DN5715_c0_g1_i10.p1 ORF type:3prime_partial len:1284 (+),score=183.05 TRINITY_DN5715_c0_g1_i10:185-4033(+)	20.57	650.9	15	11	1	8.65	1283	TRINITY_DN5715_c0_g1_i10.p1	TRINITY_DN5715_c0_g1_i10	AGRB1_HUMAN^AGRB1_HUMAN^Q:2231-4033,H:581-1182^28.774%ID^E:1.9e-50^RecName: Full	Adhesion G protein-coupled receptor B1 {ECO:0000312|HGNC:HGNC:943}	AGRB1_HUMAN^AGRB1_HUMAN^Q:683-1283,H:581-1182^28.951%ID^E:5.01e-55^RecName: Full=Adhesion G protein-coupled receptor B1 {ECO:0000312|HGNC:HGNC:943};^Eukaryota; Metazoa; Chordata; Craniata; Vertebrata; Euteleostomi; Mammalia; Eutheria; Euarchontoglires; Primates; Haplorrhini; Catarrhini; Hominidae; Homo	.	ExpAA=140.30^PredHel=6^Topology=o1047-1069i1082-1099o1114-1136i1156-1178o1193-1215i1236-1258o	ENOG4111FBM^brain-specific angiogenesis inhibitor	KEGG:hsa:575`KO:K04596	GO:0005911^cellular_component^cell-cell junction`GO:0030425^cellular_component^dendrite`GO:0043197^cellular_component^dendritic spine`GO:0005615^cellular_component^extracellular space`GO:0005925^cellular_component^focal adhesion`GO:0016021^cellular_component^integral component of membrane`GO:0005887^cellular_component^integral component of plasma membrane`GO:0048471^cellular_component^perinuclear…	GO:0005911^cellular_component^cell-cell junction`GO:0030425^cellular_component^dendrite`GO:0043197^cellular_component^dendritic spine`GO:0005615^cellular_component^extracellular space`GO:0005925^cellular_component^focal adhesion`GO:0016021^cellular_component^integral component of membrane`GO:0005887^cellular_component^integral component of plasma membrane`GO:0048471^cellular_component^perinuclear…	GO:0030425;GO:0043197;GO:0005615;GO:0005925;GO:0016021;GO:0016021;GO:0005887;GO:0048471;GO:0001891;GO:0005886;GO:0014069;GO:0004930;GO:0001530;GO:0030165;GO:0001786;GO:0007189;GO:0043277;GO:0007409;GO:0007155;GO:0007166;GO:0050829;GO:0043652;GO:0007186;GO:0045087;GO:0007517;GO:0016525;GO:0008285;GO:0010596;GO:0042177;GO:0031397;GO:0007422;GO:0006910;GO:1901741;GO:1903428;GO:0051965;GO:0048167;GO:…	Y	FALSE	+	6.93687	2.0265	4.91037	4.83242	3.81917	6.85892	1.4809	5.45596	6.85892	8.106	1.32502	4.67654	5.06625	3.97506	3.5074	8.02806	8.18394	9.66485	1.63679	2.65004	100	9.74279	8.106
>TRINITY_DN59303_c0_g1_i1.p1 TRINITY_DN59303_c0_g1~~TRINITY_DN59303_c0_g1_i1.p1 ORF type:complete len:149 (+),score=7.48 TRINITY_DN59303_c0_g1_i1:141-587(+)	7.84	648.5	3	3	0	21.62	148	TRINITY_DN59303_c0_g1_i1.p1	TRINITY_DN59303_c0_g1_i1	LOXH1_MOUSE^LOXH1_MOUSE^Q:234-545,H:174-277^38.462%ID^E:1.3e-12^RecName: Full	Lipoxygenase homology domain-containing protein 1	LOXH1_MOUSE^LOXH1_MOUSE^Q:32-135,H:174-277^38.462%ID^E:4.4e-14^RecName: Full=Lipoxygenase homology domain-containing protein 1;^Eukaryota; Metazoa; Chordata; Craniata; Vertebrata; Euteleostomi; Mammalia; Eutheria; Euarchontoglires; Glires; Rodentia; Myomorpha; Muroidea; Muridae; Murinae; Mus; Mus	.	.	ENOG410XTDU^lipoxygenase homology domains 1	KEGG:mmu:240411	GO:0032420^cellular_component^stereocilium`GO:0004096^molecular_function^catalase activity`GO:0020037^molecular_function^heme binding`GO:0007605^biological_process^sensory perception of sound	GO:0032420^cellular_component^stereocilium`GO:0004096^molecular_function^catalase activity`GO:0020037^molecular_function^heme binding`GO:0007605^biological_process^sensory perception of sound	GO:0004096;GO:0020037;GO:0007605;	Y	+	FALSE	6.75676	2.02703	6.08108	4.72973	6.08108	7.43243	2.7027	6.75676	8.10811	8.10811	0.675676	7.43243	2.7027	2.02703	2.7027	6.75676	4.72973	7.43243	2.7027	4.05405	100	10.8108	12.8378	SP(Sec/SPI)	0.991473	0.008527	CS pos: 23-24. VCP-EN. Pr: 0.5430
>TRINITY_DN598_c0_g1_i2.p1 TRINITY_DN598_c0_g1~~TRINITY_DN598_c0_g1_i2.p1 ORF type:5prime_partial len:358 (+),score=52.39 TRINITY_DN598_c0_g1_i2:2-1075(+)	12.72	701.1	6	5	0	14.85	357	TRINITY_DN598_c0_g1_i2.p1	TRINITY_DN598_c0_g1_i2	no blast hit	no blast hit	.	tr|A0A2B4SEP4|A0A2B4SEP4_STYPI^tr|A0A2B4SEP4|A0A2B4SEP4_STYPI^Q:160-1023,H:74-360^35.505%ID^E:3.67e-35^.^.	.	.	.	.	.		Y	FALSE	FALSE	9.2437	1.68067	3.92157	5.04202	6.16246	5.60224	3.08123	2.80112	3.36134	7.0028	2.2409	5.60224	7.0028	5.60224	5.32213	5.32213	7.84314	7.28291	1.68067	4.20168	100	8.96359	12.0448
>TRINITY_DN5980_c0_g1_i1.p1 TRINITY_DN5980_c0_g1~~TRINITY_DN5980_c0_g1_i1.p1 ORF type:5prime_partial len:1003 (-),score=229.82 TRINITY_DN5980_c0_g1_i1:971-3979(-)	0.98	322.7	9	4	0	5.79	1002	TRINITY_DN5980_c0_g1_i1.p1	TRINITY_DN5980_c0_g1_i1	FAK1_MOUSE^FAK1_MOUSE^Q:3979-2090,H:125-723^52.283%ID^E:0^RecName: Full	Focal adhesion kinase 1	FAK1_XENLA^FAK1_XENLA^Q:1-996,H:125-1058^44.956%ID^E:0^RecName: Full=Focal adhesion kinase 1;^Eukaryota; Metazoa; Chordata; Craniata; Vertebrata; Euteleostomi; Amphibia; Batrachia; Anura; Pipoidea; Pipidae; Xenopodinae; Xenopus; Xenopus	tr|A0A2B4RHU0|A0A2B4RHU0_STYPI^tr|A0A2B4RHU0|A0A2B4RHU0_STYPI^Q:2-442,H:43-194^54.487%ID^E:1.46e-17^.^.	.	ENOG410ZH9Y^Protein tyrosine kinase 2	KEGG:xla:399286`KO:K05725	GO:0005912^cellular_component^adherens junction`GO:0016324^cellular_component^apical plasma membrane`GO:0016323^cellular_component^basolateral plasma membrane`GO:0005623^cellular_component^cell`GO:0005737^cellular_component^cytoplasm`GO:0005829^cellular_component^cytosol`GO:0043197^cellular_component^dendritic spine`GO:0005925^cellular_component^focal adhesion`GO:0098978^cellular_component^glutam…	GO:0005856^cellular_component^cytoskeleton`GO:0005925^cellular_component^focal adhesion`GO:0005886^cellular_component^plasma membrane`GO:0005524^molecular_function^ATP binding`GO:0004715^molecular_function^non-membrane spanning protein tyrosine kinase activity`GO:0007275^biological_process^multicellular organism development`GO:0007172^biological_process^signal complex assembly	GO:0005925;GO:0005886;GO:0005524;GO:0004715;GO:0007275;GO:0007275;GO:0007172;	Y	FALSE	FALSE	6.98603	1.29741	5.78842	6.58683	3.89222	4.69062	2.59481	5.18962	6.78643	8.38323	2.89421	2.79441	6.38723	4.99002	5.88822	10.479	5.08982	5.48902	0.698603	3.09381	100	12.3752	7.68463
>TRINITY_DN60864_c0_g1_i1.p1 TRINITY_DN60864_c0_g1~~TRINITY_DN60864_c0_g1_i1.p1 ORF type:internal len:156 (-),score=8.02 TRINITY_DN60864_c0_g1_i1:1-465(-)	4.79	499.3	5	3	0	16.77	155	TRINITY_DN60864_c0_g1_i1.p1	TRINITY_DN60864_c0_g1_i1	no blast hit	no blast hit	.	.	.	.	.	.	.		Y	FALSE	FALSE	6.45161	14.8387	7.09677	7.09677	3.87097	7.74194	1.93548	1.29032	7.74194	7.74194	0	3.22581	9.67742	1.29032	5.80645	3.22581	5.80645	3.87097	0	1.29032	100	14.1935	5.16129
>TRINITY_DN6241_c0_g2_i2.p1 TRINITY_DN6241_c0_g2~~TRINITY_DN6241_c0_g2_i2.p1 ORF type:3prime_partial len:149 (+),score=21.15 TRINITY_DN6241_c0_g2_i2:477-920(+)	14.64	710.6	5	3	0	31.08	148	TRINITY_DN6241_c0_g2_i2.p1	TRINITY_DN6241_c0_g2_i2	no blast hit	no blast hit	.	.	.	.	.	.	.		Y	FALSE	+	7.43243	0.675676	5.40541	4.72973	6.75676	6.08108	0.675676	4.72973	8.10811	8.78378	2.02703	7.43243	7.43243	3.37838	2.7027	4.05405	8.10811	9.45946	1.35135	0.675676	100	10.1351	8.78378
>TRINITY_DN629_c0_g1_i4.p1 TRINITY_DN629_c0_g1~~TRINITY_DN629_c0_g1_i4.p1 ORF type:complete len:186 (+),score=31.16 TRINITY_DN629_c0_g1_i4:329-886(+)	1.74	425.1	2	2	0	12.43	185	TRINITY_DN629_c0_g1_i4.p1	TRINITY_DN629_c0_g1_i4	no blast hit	no blast hit	.	.	ExpAA=21.74^PredHel=1^Topology=i3-25o	.	.	.	.		Y	+	FALSE	10.8108	1.62162	6.48649	1.62162	2.7027	9.18919	1.08108	4.86486	6.48649	6.48649	2.16216	1.08108	5.94595	5.40541	4.86486	4.86486	5.40541	9.72973	3.24324	5.94595	100	8.10811	11.8919	SP(Sec/SPI)	0.987641	0.012359	CS pos: 25-26. VMA-QG. Pr: 0.6354
>TRINITY_DN656_c0_g1_i1.p1 TRINITY_DN656_c0_g1~~TRINITY_DN656_c0_g1_i1.p1 ORF type:complete len:202 (-),score=22.44 TRINITY_DN656_c0_g1_i1:259-864(-)	5.17	445.1	4	3	1	17.41	201	TRINITY_DN656_c0_g1_i1.p1	TRINITY_DN656_c0_g1_i1	SODC_CAEEL^SODC_CAEEL^Q:711-271,H:36-179^51.02%ID^E:4.71e-40^RecName: Full	Superoxide dismutase [Cu-Zn]	SODC_CAEEL^SODC_CAEEL^Q:52-198,H:36-179^51.02%ID^E:1.25e-41^RecName: Full=Superoxide dismutase [Cu-Zn];^Eukaryota; Metazoa; Ecdysozoa; Nematoda; Chromadorea; Rhabditida; Rhabditina; Rhabditomorpha; Rhabditoidea; Rhabditidae; Peloderinae; Caenorhabditis	tr|A0A2B4S7B6|A0A2B4S7B6_STYPI^tr|A0A2B4S7B6|A0A2B4S7B6_STYPI^Q:34-525,H:14-180^57.895%ID^E:5.27e-51^.^.	.	COG2032^Destroys radicals which are normally produced within the cells and which are toxic to biological systems (By similarity)	KEGG:cel:CELE_C15F1.7`KO:K04565	GO:0005737^cellular_component^cytoplasm`GO:0005829^cellular_component^cytosol`GO:0005576^cellular_component^extracellular region`GO:0005615^cellular_component^extracellular space`GO:0005739^cellular_component^mitochondrion`GO:0005507^molecular_function^copper ion binding`GO:0042803^molecular_function^protein homodimerization activity`GO:0004784^molecular_function^superoxide dismutase activity`GO:…	GO:0005737^cellular_component^cytoplasm`GO:0005829^cellular_component^cytosol`GO:0005576^cellular_component^extracellular region`GO:0005615^cellular_component^extracellular space`GO:0005739^cellular_component^mitochondrion`GO:0005507^molecular_function^copper ion binding`GO:0042803^molecular_function^protein homodimerization activity`GO:0004784^molecular_function^superoxide dismutase activity`GO:…	GO:0005829;GO:0005576;GO:0005615;GO:0005739;GO:0005507;GO:0005507;GO:0042803;GO:0004784;GO:0001306;GO:0055114;GO:0060378;GO:0040028;GO:0019430;GO:0006801	Y	+	FALSE	8.45771	2.98507	8.45771	3.48259	3.48259	11.9403	4.97512	5.47264	4.97512	7.46269	0.995025	3.48259	5.97015	3.9801	4.97512	4.97512	5.47264	6.96517	0	1.49254	100	11.9403	4.97512	SP(Sec/SPI)	0.979213	0.020787	CS pos: 21-22. TLC-AD. Pr: 0.6225
>TRINITY_DN6561_c2_g1_i4.p1 TRINITY_DN6561_c2_g1~~TRINITY_DN6561_c2_g1_i4.p1 ORF type:complete len:529 (-),score=80.36 TRINITY_DN6561_c2_g1_i4:95-1462(-)	5.87	381.6	10	8	1	17.14	455	TRINITY_DN6561_c2_g1_i4.p1	TRINITY_DN6561_c2_g1_i4	GNS_MOUSE^GNS_MOUSE^Q:1591-128,H:33-510^52.653%ID^E:1.68e-173^RecName: Full	N-acetylglucosamine-6-sulfatase	GNS_MOUSE^GNS_MOUSE^Q:2-445,H:77-510^52.691%ID^E:2.59e-164^RecName: Full=N-acetylglucosamine-6-sulfatase;^Eukaryota; Metazoa; Chordata; Craniata; Vertebrata; Euteleostomi; Mammalia; Eutheria; Euarchontoglires; Glires; Rodentia; Myomorpha; Muroidea; Muridae; Murinae; Mus; Mus	.	.	COG3119^Sulfatase	KEGG:mmu:75612`KO:K01137	GO:0005764^cellular_component^lysosome`GO:0005539^molecular_function^glycosaminoglycan binding`GO:0046872^molecular_function^metal ion binding`GO:0008449^molecular_function^N-acetylglucosamine-6-sulfatase activity`GO:0043199^molecular_function^sulfate binding`GO:0008484^molecular_function^sulfuric ester hydrolase activity`GO:0030203^biological_process^glycosaminoglycan metabolic process	GO:0005764^cellular_component^lysosome`GO:0005539^molecular_function^glycosaminoglycan binding`GO:0046872^molecular_function^metal ion binding`GO:0008449^molecular_function^N-acetylglucosamine-6-sulfatase activity`GO:0043199^molecular_function^sulfate binding`GO:0008484^molecular_function^sulfuric ester hydrolase activity`GO:0030203^biological_process^glycosaminoglycan metabolic process	GO:0005539;GO:0046872;GO:0008449;GO:0043199;GO:0008484;GO:0008484;GO:0030203;	Y	+	FALSE	6.15385	2.85714	5.71429	4.17582	4.61538	7.47253	3.07692	3.95604	5.93407	7.25275	1.53846	6.37363	6.81319	3.73626	3.95604	8.35165	6.15385	5.93407	1.75824	4.17582	100	9.89011	10.5495	OTHER	0.008227	0.991773
>TRINITY_DN66999_c0_g1_i1.p1 TRINITY_DN66999_c0_g1~~TRINITY_DN66999_c0_g1_i1.p1 ORF type:5prime_partial len:211 (-),score=25.00 TRINITY_DN66999_c0_g1_i1:351-983(-)	5.81	447.1	3	3	0	11.43	210	TRINITY_DN66999_c0_g1_i1.p1	TRINITY_DN66999_c0_g1_i1	no blast hit	no blast hit	.	.	.	.	.	.	.		Y	FALSE	FALSE	8.09524	0.47619	5.71429	3.80952	2.85714	7.14286	2.38095	5.2381	5.71429	9.52381	2.85714	3.80952	2.85714	1.90476	10.9524	8.09524	5.2381	9.04762	0.47619	3.80952	100	9.52381	7.14286
>TRINITY_DN67248_c0_g1_i2.p1 TRINITY_DN67248_c0_g1~~TRINITY_DN67248_c0_g1_i2.p1 ORF type:internal len:178 (-),score=41.11 TRINITY_DN67248_c0_g1_i2:2-532(-)	6.07	542.8	2	2	0	10.73	177	TRINITY_DN67248_c0_g1_i2.p1	TRINITY_DN67248_c0_g1_i2	HMCN2_MOUSE^HMCN2_MOUSE^Q:493-2,H:697-859^33.333%ID^E:5.71e-20^RecName: Full	Hemicentin-2	HMCN2_MOUSE^HMCN2_MOUSE^Q:14-177,H:697-859^33.333%ID^E:5.14e-20^RecName: Full=Hemicentin-2;^Eukaryota; Metazoa; Chordata; Craniata; Vertebrata; Euteleostomi; Mammalia; Eutheria; Euarchontoglires; Glires; Rodentia; Myomorpha; Muroidea; Muridae; Murinae; Mus; Mus	.	.	ENOG410ZN3C^von Willebrand factor A domain containing 7	.	GO:0005604^cellular_component^basement membrane`GO:0005938^cellular_component^cell cortex`GO:0030054^cellular_component^cell junction`GO:0032154^cellular_component^cleavage furrow`GO:0062023^cellular_component^collagen-containing extracellular matrix`GO:0031012^cellular_component^extracellular matrix`GO:0005576^cellular_component^extracellular region`GO:0005615^cellular_component^extracellular sp…	GO:0005604^cellular_component^basement membrane`GO:0005938^cellular_component^cell cortex`GO:0030054^cellular_component^cell junction`GO:0032154^cellular_component^cleavage furrow`GO:0062023^cellular_component^collagen-containing extracellular matrix`GO:0031012^cellular_component^extracellular matrix`GO:0005576^cellular_component^extracellular region`GO:0005615^cellular_component^extracellular sp…	GO:0005938;GO:0030054;GO:0032154;GO:0062023;GO:0031012;GO:0031012;GO:0005576;GO:0005615;GO:0005509;GO:0050896	Y	FALSE	FALSE	7.34463	2.25989	8.47458	5.08475	0	9.60452	0	8.47458	3.9548	3.38983	0	5.64972	7.34463	3.38983	1.69492	6.77966	8.47458	14.6893	1.69492	1.69492	100	13.5593	3.38983
>TRINITY_DN687_c1_g1_i3.p2 TRINITY_DN687_c1_g1~~TRINITY_DN687_c1_g1_i3.p2 ORF type:3prime_partial len:117 (-),score=31.07 TRINITY_DN687_c1_g1_i3:2-349(-)	4.35	523.7	2	2	0	13.79	116	TRINITY_DN687_c1_g1_i3.p2	TRINITY_DN687_c1_g1_i3	no blast hit	no blast hit	.	.	.	.	.	.	.		Y	FALSE	+	10.3448	6.89655	5.17241	4.31034	6.89655	10.3448	0.862069	2.58621	11.2069	6.03448	2.58621	2.58621	6.89655	6.89655	1.72414	5.17241	2.58621	4.31034	0	2.58621	100	9.48276	9.48276
>TRINITY_DN6883_c1_g1_i2.p1 TRINITY_DN6883_c1_g1~~TRINITY_DN6883_c1_g1_i2.p1 ORF type:5prime_partial len:3327 (-),score=1160.96 TRINITY_DN6883_c1_g1_i2:2105-12085(-)	23.5	648.4	12	11	0	3.55	3326	TRINITY_DN6883_c1_g1_i2.p1	TRINITY_DN6883_c1_g1_i2	MACF1_MOUSE^MACF1_MOUSE^Q:12085-2909,H:4130-7184^27.391%ID^E:0^RecName: Full	Microtubule-actin cross-linking factor 1	MACF1_HUMAN^MACF1_HUMAN^Q:1-3220,H:4168-7366^27.793%ID^E:0^RecName: Full=Microtubule-actin cross-linking factor 1, isoforms 1/2/3/5;^Eukaryota; Metazoa; Chordata; Craniata; Vertebrata; Euteleostomi; Mammalia; Eutheria; Euarchontoglires; Primates; Haplorrhini; Catarrhini; Hominidae; Homo	.	.	COG5069^Microtubule associated monoxygenase, calponin and LIM domain containing	KEGG:hsa:23499`KO:K19827	GO:0015629^cellular_component^actin cytoskeleton`GO:0005938^cellular_component^cell cortex`GO:0005737^cellular_component^cytoplasm`GO:0005794^cellular_component^Golgi apparatus`GO:0016020^cellular_component^membrane`GO:0005874^cellular_component^microtubule`GO:0015630^cellular_component^microtubule cytoskeleton`GO:0014069^cellular_component^postsynaptic density`GO:0032587^cellular_component^ruffl…	GO:0015629^cellular_component^actin cytoskeleton`GO:0005737^cellular_component^cytoplasm`GO:0005856^cellular_component^cytoskeleton`GO:0005794^cellular_component^Golgi apparatus`GO:0016020^cellular_component^membrane`GO:0005874^cellular_component^microtubule`GO:0005886^cellular_component^plasma membrane`GO:0032587^cellular_component^ruffle membrane`GO:0003779^molecular_function^actin binding`GO:0…	GO:0005737;GO:0005856;GO:0005794;GO:0016020;GO:0005874;GO:0005874;GO:0005886;GO:0032587;GO:0003779;GO:0051015;GO:0016887;GO:0045296;GO:0005509;GO:0051011;GO:0003723;GO:0043001;GO:0045104;GO:0045773;GO:0030177;GO:0030334;GO:0010632;GO:0051893;GO:0032886;GO:0150011;GO:0016055;GO:0042060	Y	FALSE	FALSE	9.14011	0.811786	8.20806	12.0265	1.74384	4.17919	1.6837	3.15695	9.5009	10.6133	1.80397	3.30728	3.48767	6.40409	4.84065	6.82502	4.29946	5.6825	1.23271	1.05232	100	20.2345	4.02886
>TRINITY_DN70518_c0_g1_i1.p1 TRINITY_DN70518_c0_g1~~TRINITY_DN70518_c0_g1_i1.p1 ORF type:internal len:207 (+),score=37.37 TRINITY_DN70518_c0_g1_i1:2-619(+)	2.51	457.6	2	2	0	16.02	206	TRINITY_DN70518_c0_g1_i1.p1	TRINITY_DN70518_c0_g1_i1	AGRV1_HUMAN^AGRV1_HUMAN^Q:8-607,H:2086-2301^30.357%ID^E:5.32e-19^RecName: Full	Adhesion G-protein coupled receptor V1 {ECO:0000305}	AGRV1_HUMAN^AGRV1_HUMAN^Q:3-202,H:2086-2301^30.357%ID^E:4.79e-19^RecName: Full=Adhesion G-protein coupled receptor V1 {ECO:0000305};^Eukaryota; Metazoa; Chordata; Craniata; Vertebrata; Euteleostomi; Mammalia; Eutheria; Euarchontoglires; Primates; Haplorrhini; Catarrhini; Hominidae; Homo	.	.	ENOG410XT0U^G protein-coupled receptor 98	KEGG:hsa:84059`KO:K18263	GO:0009986^cellular_component^cell surface`GO:0005737^cellular_component^cytoplasm`GO:0070062^cellular_component^extracellular exosome`GO:0016021^cellular_component^integral component of membrane`GO:0016020^cellular_component^membrane`GO:1990075^cellular_component^periciliary membrane compartment`GO:0001917^cellular_component^photoreceptor inner segment`GO:0005886^cellular_component^plasma membra…	GO:0009986^cellular_component^cell surface`GO:0005737^cellular_component^cytoplasm`GO:0070062^cellular_component^extracellular exosome`GO:0016021^cellular_component^integral component of membrane`GO:0016020^cellular_component^membrane`GO:1990075^cellular_component^periciliary membrane compartment`GO:0001917^cellular_component^photoreceptor inner segment`GO:0005886^cellular_component^plasma membra…	GO:0005737;GO:0070062;GO:0016021;GO:0016020;GO:1990075;GO:1990075;GO:0001917;GO:0005886;GO:0043235;GO:0002141;GO:0002142;GO:0060171;GO:0045202;GO:1990696;GO:0010855;GO:0005509;GO:0004930;GO:0001965;GO:0016787;GO:0007166;GO:0098609;GO:0071277;GO:0050910;GO:0045184;GO:0007186;GO:0048839;GO:0060122;GO:0048496;GO:0007194;GO:0007399;GO:0050877;GO:0045494;GO:0030501;GO:0010739;GO:0090037;GO:0031647;GO:…	Y	FALSE	FALSE	6.31068	0	6.79612	5.82524	3.39806	10.6796	0.970874	3.39806	1.94175	7.76699	1.45631	3.8835	5.33981	9.2233	4.85437	8.25243	5.33981	11.165	0.485437	2.91262	100	12.6214	6.79612
>TRINITY_DN7071_c1_g4_i1.p1 TRINITY_DN7071_c1_g4~~TRINITY_DN7071_c1_g4_i1.p1 ORF type:complete len:658 (-),score=65.32 TRINITY_DN7071_c1_g4_i1:1331-3283(-)	6.78	572.1	4	3	0	4.46	650	TRINITY_DN7071_c1_g4_i1.p1	TRINITY_DN7071_c1_g4_i1	no blast hit	no blast hit	.	.	ExpAA=24.40^PredHel=1^Topology=o613-635i	.	.	.	.		Y	+	FALSE	6.46154	1.53846	4.76923	4	6.46154	7.07692	2.61538	4.46154	5.38462	6	1.84615	6.30769	5.07692	3.38462	6.61538	8	6	7.53846	1.69231	4.76923	100	8.76923	12.9231	SP(Sec/SPI)	0.996958	0.003042	CS pos: 24-25. SDA-LE. Pr: 0.8584
>TRINITY_DN724_c0_g1_i5.p2 TRINITY_DN724_c0_g1~~TRINITY_DN724_c0_g1_i5.p2 ORF type:complete len:152 (-),score=41.14 TRINITY_DN724_c0_g1_i5:1013-1468(-)	15.18	777.7	4	4	2	27.81	151	TRINITY_DN724_c0_g1_i5.p2	TRINITY_DN724_c0_g1_i5	no blast hit	no blast hit	.	.	.	.	.	.	.		Y	+	FALSE	8.60927	2.64901	5.96026	17.2185	1.98675	5.29801	1.3245	0.662252	13.245	5.96026	0.662252	5.96026	3.97351	2.64901	1.98675	7.28477	6.62252	7.28477	0	0.662252	100	23.1788	2.64901	OTHER	0.000567	0.999433
>TRINITY_DN72628_c0_g1_i1.p1 TRINITY_DN72628_c0_g1~~TRINITY_DN72628_c0_g1_i1.p1 ORF type:internal len:157 (-),score=15.27 TRINITY_DN72628_c0_g1_i1:1-468(-)	2.27	394.5	2	2	1	12.18	156	TRINITY_DN72628_c0_g1_i1.p1	TRINITY_DN72628_c0_g1_i1	PCDL_ACRMI^PCDL_ACRMI^Q:423-7,H:1789-1927^56.115%ID^E:2.06e-45^RecName: Full	Protocadherin-like protein {ECO:0000303|PubMed:23765379}	PCDL_ACRMI^PCDL_ACRMI^Q:1-154,H:1774-1927^59.091%ID^E:2.77e-55^RecName: Full=Protocadherin-like protein {ECO:0000303|PubMed:23765379};^Eukaryota; Metazoa; Cnidaria; Anthozoa; Hexacorallia; Scleractinia; Astrocoeniina; Acroporidae; Acropora	.	.	.	.	GO:0016021^cellular_component^integral component of membrane`GO:0005886^cellular_component^plasma membrane`GO:0005509^molecular_function^calcium ion binding`GO:0007156^biological_process^homophilic cell adhesion via plasma membrane adhesion molecules	GO:0016021^cellular_component^integral component of membrane`GO:0005886^cellular_component^plasma membrane`GO:0005509^molecular_function^calcium ion binding`GO:0007156^biological_process^homophilic cell adhesion via plasma membrane adhesion molecules	GO:0005886;GO:0005509;GO:0007156;	Y	FALSE	FALSE	5.76923	0	7.05128	4.48718	7.05128	7.05128	0.641026	4.48718	3.20513	6.41026	0.641026	8.97436	4.48718	3.84615	6.41026	7.05128	7.69231	10.8974	0.641026	3.20513	100	11.5385	10.8974
>TRINITY_DN7547_c0_g1_i1.p1 TRINITY_DN7547_c0_g1~~TRINITY_DN7547_c0_g1_i1.p1 ORF type:5prime_partial len:1978 (+),score=298.94 TRINITY_DN7547_c0_g1_i1:2-5935(+)	4.59	461.9	10	8	2	3.39	1977	TRINITY_DN7547_c0_g1_i1.p1	TRINITY_DN7547_c0_g1_i1	PCDL_ACRMI^PCDL_ACRMI^Q:2-5539,H:2131-3998^52.368%ID^E:0^RecName: Full	Protocadherin-like protein {ECO:0000303|PubMed:23765379}	PCDL_ACRMI^PCDL_ACRMI^Q:1-1908,H:2131-4056^51.674%ID^E:0^RecName: Full=Protocadherin-like protein {ECO:0000303|PubMed:23765379};^Eukaryota; Metazoa; Cnidaria; Anthozoa; Hexacorallia; Scleractinia; Astrocoeniina; Acroporidae; Acropora	tr|A0A3M6V3V6|A0A3M6V3V6_9CNID^tr|A0A3M6V3V6|A0A3M6V3V6_9CNID^Q:13-471,H:1-153^97.386%ID^E:2.04e-93^.^.	.	.	.	GO:0016021^cellular_component^integral component of membrane`GO:0005886^cellular_component^plasma membrane`GO:0005509^molecular_function^calcium ion binding`GO:0007156^biological_process^homophilic cell adhesion via plasma membrane adhesion molecules	GO:0016021^cellular_component^integral component of membrane`GO:0005886^cellular_component^plasma membrane`GO:0005509^molecular_function^calcium ion binding`GO:0007156^biological_process^homophilic cell adhesion via plasma membrane adhesion molecules	GO:0005886;GO:0005509;GO:0007156;	Y	FALSE	FALSE	6.32271	1.1128	7.08144	5.76631	4.24886	8.49772	1.1128	5.20991	6.0698	6.37329	1.36571	5.46282	4.45119	2.88316	5.15933	8.09307	7.03085	9.30703	0.556399	3.89479	100	12.8477	8.70005
>TRINITY_DN75568_c0_g1_i1.p1 TRINITY_DN75568_c0_g1~~TRINITY_DN75568_c0_g1_i1.p1 ORF type:internal len:359 (-),score=88.09 TRINITY_DN75568_c0_g1_i1:1-1074(-)	7.09	553.9	2	2	1	3.35	358	TRINITY_DN75568_c0_g1_i1.p1	TRINITY_DN75568_c0_g1_i1	no blast hit	no blast hit	CO5A2_HUMAN^CO5A2_HUMAN^Q:2-358,H:462-864^41.966%ID^E:3.97e-30^RecName: Full=Collagen alpha-2(V) chain;^Eukaryota; Metazoa; Chordata; Craniata; Vertebrata; Euteleostomi; Mammalia; Eutheria; Euarchontoglires; Primates; Haplorrhini; Catarrhini; Hominidae; Homo	.	.	ENOG4110XTV^Collagen, type V, alpha 2	KEGG:hsa:1290`KO:K19721	.	GO:0005588^cellular_component^collagen type V trimer`GO:0062023^cellular_component^collagen-containing extracellular matrix`GO:0005788^cellular_component^endoplasmic reticulum lumen`GO:0031012^cellular_component^extracellular matrix`GO:0005576^cellular_component^extracellular region`GO:0005615^cellular_component^extracellular space`GO:0005201^molecular_function^extracellular matrix structural con…	GO:0062023;GO:0005788;GO:0031012;GO:0005576;GO:0005615;GO:0005615;GO:0005201;GO:0030020;GO:0046872;GO:0046332;GO:0071230;GO:0030199;GO:0030198;GO:0048592;GO:1903225;GO:0001503;GO:0001501;GO:0043588	Y	FALSE	FALSE	6.42458	0	7.5419	6.42458	1.95531	33.7989	0	1.95531	2.7933	3.63128	0.837989	1.11732	17.8771	4.7486	1.67598	3.07263	3.35196	2.7933	0	0	100	13.9665	1.95531
>TRINITY_DN7634_c0_g2_i4.p1 TRINITY_DN7634_c0_g2~~TRINITY_DN7634_c0_g2_i4.p1 ORF type:5prime_partial len:172 (+),score=31.64 TRINITY_DN7634_c0_g2_i4:1-516(+)	9.25	752.2	5	2	0	11.7	171	TRINITY_DN7634_c0_g2_i4.p1	TRINITY_DN7634_c0_g2_i4	no blast hit	no blast hit	.	.	.	.	.	.	.		Y	FALSE	FALSE	8.77193	0	8.18713	4.67836	5.26316	7.01754	1.75439	0.584795	7.60234	8.77193	3.50877	5.84795	5.84795	3.50877	2.92398	5.84795	10.5263	5.84795	0.584795	2.92398	100	12.8655	8.77193
>TRINITY_DN800_c0_g1_i7.p1 TRINITY_DN800_c0_g1~~TRINITY_DN800_c0_g1_i7.p1 ORF type:3prime_partial len:137 (+),score=21.72 TRINITY_DN800_c0_g1_i7:529-936(+)	2.85	401.3	2	2	0	7.35	136	TRINITY_DN800_c0_g1_i7.p1	TRINITY_DN800_c0_g1_i7	CHI3_CANAL^CHI3_CANAL^Q:379-930,H:62-239^44.865%ID^E:5.39e-34^RecName: Full	Chitinase 3	CHIA_TOBAC^CHIA_TOBAC^Q:3-126,H:109-226^45.6%ID^E:2.46e-25^RecName: Full=Acidic endochitinase;^Eukaryota; Viridiplantae; Streptophyta; Embryophyta; Tracheophyta; Spermatophyta; Magnoliopsida; eudicotyledons; Gunneridae; Pentapetalae; asterids; lamiids; Solanales; Solanaceae; Nicotianoideae; Nicotianeae; Nicotiana	.	.	.	KEGG:nta:107825584`KO:K01183	GO:0009986^cellular_component^cell surface`GO:0005576^cellular_component^extracellular region`GO:0008061^molecular_function^chitin binding`GO:0004568^molecular_function^chitinase activity`GO:0000282^biological_process^cellular bud site selection`GO:0006032^biological_process^chitin catabolic process`GO:0000272^biological_process^polysaccharide catabolic process	GO:0005618^cellular_component^cell wall`GO:0005576^cellular_component^extracellular region`GO:0004568^molecular_function^chitinase activity`GO:0006032^biological_process^chitin catabolic process`GO:0000272^biological_process^polysaccharide catabolic process	GO:0005576;GO:0004568;GO:0006032;GO:0000272	Y	FALSE	+	7.35294	1.47059	9.55882	3.67647	7.35294	10.2941	0.735294	2.20588	2.20588	10.2941	2.94118	6.61765	5.88235	5.14706	2.94118	7.35294	3.67647	4.41176	0.735294	5.14706	100	13.2353	13.2353
>TRINITY_DN8071_c0_g1_i3.p1 TRINITY_DN8071_c0_g1~~TRINITY_DN8071_c0_g1_i3.p1 ORF type:internal len:248 (+),score=25.42 TRINITY_DN8071_c0_g1_i3:2-742(+)	6.8	514.1	4	3	1	11.74	247	TRINITY_DN8071_c0_g1_i3.p1	TRINITY_DN8071_c0_g1_i3	HMCN1_MOUSE^HMCN1_MOUSE^Q:248-724,H:4582-4740^54.717%ID^E:1.03e-55^RecName: Full	Hemicentin-1 {ECO:0000312|MGI:MGI:2685047}	HMCN1_MOUSE^HMCN1_MOUSE^Q:83-241,H:4582-4740^54.717%ID^E:9.24e-56^RecName: Full=Hemicentin-1 {ECO:0000312|MGI:MGI:2685047};^Eukaryota; Metazoa; Chordata; Craniata; Vertebrata; Euteleostomi; Mammalia; Eutheria; Euarchontoglires; Glires; Rodentia; Myomorpha; Muroidea; Muridae; Murinae; Mus; Mus	.	.	ENOG410ZN3C^von Willebrand factor A domain containing 7	KEGG:mmu:545370`KO:K17341	GO:0005604^cellular_component^basement membrane`GO:0005938^cellular_component^cell cortex`GO:0030054^cellular_component^cell junction`GO:0032154^cellular_component^cleavage furrow`GO:0062023^cellular_component^collagen-containing extracellular matrix`GO:0005576^cellular_component^extracellular region`GO:0005509^molecular_function^calcium ion binding`GO:0050839^molecular_function^cell adhesion mol…	GO:0005604^cellular_component^basement membrane`GO:0005938^cellular_component^cell cortex`GO:0030054^cellular_component^cell junction`GO:0032154^cellular_component^cleavage furrow`GO:0062023^cellular_component^collagen-containing extracellular matrix`GO:0005576^cellular_component^extracellular region`GO:0005509^molecular_function^calcium ion binding`GO:0050839^molecular_function^cell adhesion mol…	GO:0005938;GO:0030054;GO:0032154;GO:0062023;GO:0005576;GO:0005576;GO:0005509;GO:0050839;GO:0042803;GO:0038023;GO:0007049;GO:0051301;GO:0007157;GO:0007156;GO:0009617;	Y	FALSE	FALSE	6.47773	6.88259	8.09717	8.09717	1.21457	13.3603	0	5.26316	2.42915	3.64372	0.809717	5.26316	9.7166	4.04858	5.26316	4.45344	6.47773	4.45344	3.64372	0.404858	100	16.1943	5.26316
>TRINITY_DN8235_c0_g1_i1.p1 TRINITY_DN8235_c0_g1~~TRINITY_DN8235_c0_g1_i1.p1 ORF type:complete len:291 (+),score=114.58 TRINITY_DN8235_c0_g1_i1:67-939(+)	2.42	487.2	2	2	0	5.52	290	TRINITY_DN8235_c0_g1_i1.p1	TRINITY_DN8235_c0_g1_i1	no blast hit	no blast hit	TPM2_PODCA^TPM2_PODCA^Q:1-251,H:1-251^31.873%ID^E:1.06e-16^RecName: Full=Tropomyosin-2;^Eukaryota; Metazoa; Cnidaria; Hydrozoa; Hydroidolina; Anthoathecata; Filifera; Hydractiniidae; Podocoryna	.	.	.	.	.	.		Y	+	FALSE	8.27586	0	10	21.7241	2.06897	1.37931	0.689655	3.7931	11.3793	8.62069	2.41379	4.82759	3.10345	3.44828	4.82759	4.48276	4.48276	3.7931	0	0.689655	100	31.7241	2.75862	OTHER	0.000235	0.999765
>TRINITY_DN8307_c0_g2_i1.p1 TRINITY_DN8307_c0_g2~~TRINITY_DN8307_c0_g2_i1.p1 ORF type:internal len:187 (-),score=57.27 TRINITY_DN8307_c0_g2_i1:1-558(-)	6.41	508.2	2	2	0	11.83	186	TRINITY_DN8307_c0_g2_i1.p1	TRINITY_DN8307_c0_g2_i1	no blast hit	no blast hit	.	.	.	.	.	.	.		Y	FALSE	FALSE	14.5161	0	5.37634	8.06452	3.22581	3.76344	2.15054	5.37634	2.15054	13.9785	1.07527	7.52688	1.07527	4.83871	8.60215	7.52688	2.15054	6.98925	1.07527	0.537634	100	13.4409	4.83871
>TRINITY_DN8347_c0_g1_i4.p1 TRINITY_DN8347_c0_g1~~TRINITY_DN8347_c0_g1_i4.p1 ORF type:complete len:401 (+),score=92.95 TRINITY_DN8347_c0_g1_i4:113-1315(+)	32.43	776.4	11	10	1	23.5	400	TRINITY_DN8347_c0_g1_i4.p1	TRINITY_DN8347_c0_g1_i4	ZPP_ACRMI^ZPP_ACRMI^Q:242-1138,H:67-351^34.098%ID^E:2.56e-42^RecName: Full	ZP domain-containing protein {ECO:0000303|PubMed:23765379}	ZPP_ACRMI^ZPP_ACRMI^Q:44-390,H:67-394^35.127%ID^E:6.28e-58^RecName: Full=ZP domain-containing protein {ECO:0000303|PubMed:23765379};^Eukaryota; Metazoa; Cnidaria; Anthozoa; Hexacorallia; Scleractinia; Astrocoeniina; Acroporidae; Acropora	.	ExpAA=34.44^PredHel=1^Topology=o362-384i	.	.	GO:0016021^cellular_component^integral component of membrane	GO:0016021^cellular_component^integral component of membrane		Y	+	FALSE	9.75	2.75	5.75	7.75	3.5	5.75	1	5.25	5.75	8	2	3.5	3.75	3.25	4.75	8.75	6.25	7.5	0.5	4.5	100	13.5	8.5	SP(Sec/SPI)	0.96165	0.03835	CS pos: 30-31. AVA-EG. Pr: 0.5088
>TRINITY_DN846_c0_g1_i1.p1 TRINITY_DN846_c0_g1~~TRINITY_DN846_c0_g1_i1.p1 ORF type:complete len:279 (-),score=46.72 TRINITY_DN846_c0_g1_i1:147-983(-)	7.47	575.3	9	3	0	12.23	278	TRINITY_DN846_c0_g1_i1.p1	TRINITY_DN846_c0_g1_i1	no blast hit	no blast hit	.	.	.	.	.	.	.		Y	+	FALSE	7.91367	10.7914	7.91367	10.4317	3.95683	9.35252	1.07914	1.07914	6.11511	4.67626	1.79856	1.43885	6.11511	5.03597	2.8777	5.03597	5.7554	3.59712	1.07914	3.95683	100	18.3453	8.99281	OTHER	0.000887	0.999113
>TRINITY_DN8848_c0_g1_i1.p1 TRINITY_DN8848_c0_g1~~TRINITY_DN8848_c0_g1_i1.p1 ORF type:complete len:147 (-),score=21.09 TRINITY_DN8848_c0_g1_i1:90-530(-)	36.63	1073.1	8	5	0	45.21	146	TRINITY_DN8848_c0_g1_i1.p1	TRINITY_DN8848_c0_g1_i1	no blast hit	no blast hit	.	tr|A0A3M6TFH0|A0A3M6TFH0_9CNID^tr|A0A3M6TFH0|A0A3M6TFH0_9CNID^Q:130-408,H:15-107^52.688%ID^E:1.71e-30^.^.	.	.	.	.	.		Y	+	FALSE	6.16438	0.684932	5.47945	4.10959	2.05479	13.6986	3.42466	3.42466	7.53425	2.05479	1.36986	6.84932	8.21918	1.36986	2.73973	8.90411	3.42466	9.58904	2.73973	6.16438	100	9.58904	10.9589	OTHER	0.013185	0.986815
>TRINITY_DN910_c0_g1_i2.p1 TRINITY_DN910_c0_g1~~TRINITY_DN910_c0_g1_i2.p1 ORF type:5prime_partial len:1697 (+),score=484.17 TRINITY_DN910_c0_g1_i2:3-5093(+)	1.85	625.7	3	3	0	1.53	1696	TRINITY_DN910_c0_g1_i2.p1	TRINITY_DN910_c0_g1_i2	AFAD_HUMAN^AFAD_HUMAN^Q:3-2060,H:473-1112^46.369%ID^E:6.18e-176^RecName: Full	Afadin	AFAD_HUMAN^AFAD_HUMAN^Q:1-686,H:473-1112^46.648%ID^E:0^RecName: Full=Afadin;^Eukaryota; Metazoa; Chordata; Craniata; Vertebrata; Euteleostomi; Mammalia; Eutheria; Euarchontoglires; Primates; Haplorrhini; Catarrhini; Hominidae; Homo	tr|A0A3M6U9T7|A0A3M6U9T7_9CNID^tr|A0A3M6U9T7|A0A3M6U9T7_9CNID^Q:1491-1141,H:626-742^78.632%ID^E:1.6e-56^.^.	.	ENOG410XR0S^myeloid lymphoid or mixed-lineage leukemia (trithorax homolog, Drosophila)	KEGG:hsa:4301`KO:K05702	GO:0030054^cellular_component^cell junction`GO:0044291^cellular_component^cell-cell contact zone`GO:0005911^cellular_component^cell-cell junction`GO:0005829^cellular_component^cytosol`GO:0016607^cellular_component^nuclear speck`GO:0005654^cellular_component^nucleoplasm`GO:0005886^cellular_component^plasma membrane`GO:0046930^cellular_component^pore complex`GO:0070160^cellular_component^tight junc…	GO:0030054^cellular_component^cell junction`GO:0044291^cellular_component^cell-cell contact zone`GO:0005911^cellular_component^cell-cell junction`GO:0005829^cellular_component^cytosol`GO:0016607^cellular_component^nuclear speck`GO:0005654^cellular_component^nucleoplasm`GO:0005886^cellular_component^plasma membrane`GO:0046930^cellular_component^pore complex`GO:0070160^cellular_component^tight junc…	GO:0044291;GO:0005911;GO:0005829;GO:0016607;GO:0005654;GO:0005654;GO:0005886;GO:0046930;GO:0070160;GO:0051015;GO:0045296;GO:0050839;GO:0008022;GO:0017016;GO:0034332;GO:0070830;GO:0007155;GO:0044331;GO:0007267;GO:0090557;GO:0061951;GO:0030336;GO:0046931;GO:0022409;GO:2000049;GO:0010628;GO:0043547;GO:0032880;GO:0007165;	Y	FALSE	FALSE	6.78066	0.471698	6.13208	12.559	2.71226	4.42217	1.82783	2.59434	4.59906	7.31132	2.1816	3.06604	6.60377	7.78302	12.7358	6.78066	3.71462	4.83491	0.943396	1.94575	100	18.691	5.60142
>TRINITY_DN95494_c0_g1_i1.p2 TRINITY_DN95494_c0_g1~~TRINITY_DN95494_c0_g1_i1.p2 ORF type:internal len:129 (-),score=27.88 TRINITY_DN95494_c0_g1_i1:3-386(-)	1.54	377.5	2	2	1	6.25	128	TRINITY_DN95494_c0_g1_i1.p2	TRINITY_DN95494_c0_g1_i1	no blast hit	no blast hit	.	.	.	.	.	.	.		Y	FALSE	FALSE	7.8125	15.625	5.46875	7.03125	3.125	10.1562	0	2.34375	6.25	2.34375	2.34375	4.6875	4.6875	5.46875	3.90625	5.46875	3.90625	7.03125	0	2.34375	100	12.5	5.46875
>TRINITY_DN10028_c0_g1_i1.p1 TRINITY_DN10028_c0_g1~~TRINITY_DN10028_c0_g1_i1.p1 ORF type:complete len:307 (-),score=58.87 TRINITY_DN10028_c0_g1_i1:221-1141(-)	1.55	398.7	2	2	0	3.59	306	TRINITY_DN10028_c0_g1_i1.p1	TRINITY_DN10028_c0_g1_i1	ADT_CHLRE^ADT_CHLRE^Q:1135-233,H:2-303^65.132%ID^E:1.78e-122^RecName: Full	ADP,ATP carrier protein	ADT_CHLRE^ADT_CHLRE^Q:3-303,H:2-303^65.132%ID^E:8.74e-138^RecName: Full=ADP,ATP carrier protein;^Eukaryota; Viridiplantae; Chlorophyta; Chlorophyceae; Chlamydomonadales; Chlamydomonadaceae; Chlamydomonas	tr|A0A3M6T6Z8|A0A3M6T6Z8_9CNID^tr|A0A3M6T6Z8|A0A3M6T6Z8_9CNID^Q:800-372,H:1-143^84.615%ID^E:2.72e-84^.^.	ExpAA=58.80^PredHel=2^Topology=i175-197o212-234i	ENOG410XNW0^transmembrane transport	KEGG:cre:CHLREDRAFT_196520`KO:K05863	GO:0016021^cellular_component^integral component of membrane`GO:0005743^cellular_component^mitochondrial inner membrane`GO:0022857^molecular_function^transmembrane transporter activity	GO:0016021^cellular_component^integral component of membrane`GO:0005743^cellular_component^mitochondrial inner membrane`GO:0022857^molecular_function^transmembrane transporter activity	GO:0005743;GO:0022857	N	+	FALSE	10.1307	1.63399	4.90196	3.59477	6.20915	10.7843	0.653595	6.20915	7.51634	9.15033	4.57516	3.26797	1.96078	2.61438	5.88235	6.20915	4.57516	4.90196	0.326797	4.90196	100	8.49673	11.4379	OTHER	0.00159	0.99841
>TRINITY_DN10103_c0_g1_i7.p1 TRINITY_DN10103_c0_g1~~TRINITY_DN10103_c0_g1_i7.p1 ORF type:5prime_partial len:1834 (-),score=69.92 TRINITY_DN10103_c0_g1_i7:100-5601(-)	1.68	498.6	11	5	2	1.36	1833	TRINITY_DN10103_c0_g1_i7.p1	TRINITY_DN10103_c0_g1_i7	POLN_ABPVR^POLN_ABPVR^Q:4014-2749,H:1407-1841^24.176%ID^E:1.6e-17^RecName: Full	Replicase polyprotein	POLN_ABPVR^POLN_ABPVR^Q:466-887,H:1407-1841^24.176%ID^E:2.34e-17^RecName: Full=Replicase polyprotein;^Viruses; Riboviria; Picornavirales; Dicistroviridae; Aparavirus	.	.	.	KEGG:vg:911837	GO:0005524^molecular_function^ATP binding`GO:0008234^molecular_function^cysteine-type peptidase activity`GO:0003723^molecular_function^RNA binding`GO:0003724^molecular_function^RNA helicase activity`GO:0003968^molecular_function^RNA-directed 5'-3' RNA polymerase activity`GO:0006351^biological_process^transcription, DNA-templated`GO:0039694^biological_process^viral RNA genome replication	GO:0005524^molecular_function^ATP binding`GO:0008234^molecular_function^cysteine-type peptidase activity`GO:0003723^molecular_function^RNA binding`GO:0003724^molecular_function^RNA helicase activity`GO:0003968^molecular_function^RNA-directed 5'-3' RNA polymerase activity`GO:0006351^biological_process^transcription, DNA-templated`GO:0039694^biological_process^viral RNA genome replication	GO:0008234;GO:0003723;GO:0003724;GO:0003968;GO:0006351;GO:0006351;GO:0039694;	N	FALSE	FALSE	7.5832	1.03655	5.67376	7.03764	4.74632	8.18331	2.01855	5.12821	4.69176	8.01964	2.29133	3.98254	5.78287	3.87343	5.6192	6.00109	6.27387	7.20131	1.85488	3.00055	100	12.7114	9.60175
>TRINITY_DN10182_c0_g1_i1.p1 TRINITY_DN10182_c0_g1~~TRINITY_DN10182_c0_g1_i1.p1 ORF type:5prime_partial len:239 (-),score=28.48 TRINITY_DN10182_c0_g1_i1:144-860(-)	36.22	840.1	50	8	2	26.05	238	TRINITY_DN10182_c0_g1_i1.p1	TRINITY_DN10182_c0_g1_i1	ACTP1_ANTAS^ACTP1_ANTAS^Q:719-150,H:21-212^50.777%ID^E:1.35e-60^RecName: Full	DELTA-actitoxin-Aas1a {ECO:0000303|PubMed:22683676}	ACTP1_ANTAS^ACTP1_ANTAS^Q:25-237,H:1-212^47.685%ID^E:5.19e-63^RecName: Full=DELTA-actitoxin-Aas1a {ECO:0000303|PubMed:22683676};^Eukaryota; Metazoa; Cnidaria; Anthozoa; Hexacorallia; Actiniaria; Actiniidae; Anthopleura	.	.	.	.	GO:0005576^cellular_component^extracellular region`GO:0042151^cellular_component^nematocyst`GO:0044218^cellular_component^other organism cell membrane`GO:0046930^cellular_component^pore complex`GO:0015267^molecular_function^channel activity`GO:0090729^molecular_function^toxin activity`GO:0006812^biological_process^cation transport`GO:0052331^biological_process^hemolysis in other organism involved…	GO:0005576^cellular_component^extracellular region`GO:0042151^cellular_component^nematocyst`GO:0044218^cellular_component^other organism cell membrane`GO:0046930^cellular_component^pore complex`GO:0015267^molecular_function^channel activity`GO:0090729^molecular_function^toxin activity`GO:0006812^biological_process^cation transport`GO:0052331^biological_process^hemolysis in other organism involved…	GO:0042151;GO:0044218;GO:0046930;GO:0015267;GO:0090729;GO:0090729;GO:0006812;GO:0052331;GO:0009405;GO:0046931	N	FALSE	FALSE	6.30252	2.10084	6.30252	7.14286	3.78151	10.084	0.420168	4.62185	6.72269	7.14286	2.94118	2.94118	3.36134	1.68067	5.04202	7.98319	6.30252	9.2437	2.10084	3.78151	100	13.4454	9.66387
>TRINITY_DN10207_c0_g1_i1.p1 TRINITY_DN10207_c0_g1~~TRINITY_DN10207_c0_g1_i1.p1 ORF type:complete len:408 (-),score=129.24 TRINITY_DN10207_c0_g1_i1:1499-2722(-)	21.22	752.7	15	8	1	20.39	407	TRINITY_DN10207_c0_g1_i1.p1	TRINITY_DN10207_c0_g1_i1	FAXC_XENTR^FAXC_XENTR^Q:2503-1832,H:107-333^34.199%ID^E:4.57e-33^RecName: Full	Failed axon connections homolog	FAXC_XENTR^FAXC_XENTR^Q:74-297,H:107-333^34.199%ID^E:1.81e-34^RecName: Full=Failed axon connections homolog;^Eukaryota; Metazoa; Chordata; Craniata; Vertebrata; Euteleostomi; Amphibia; Batrachia; Anura; Pipoidea; Pipidae; Xenopodinae; Xenopus; Silurana	.	.	ENOG4111HSJ^failed axon connections homolog (Drosophila)	.	GO:0016021^cellular_component^integral component of membrane	GO:0016021^cellular_component^integral component of membrane		N	+	FALSE	9.09091	1.4742	6.38821	16.2162	1.9656	5.65111	1.2285	3.1941	10.5651	5.65111	1.7199	3.4398	5.40541	2.9484	2.9484	5.40541	6.38821	5.65111	1.4742	3.1941	100	22.6044	6.63391	OTHER	0.000495	0.999505
>TRINITY_DN10537_c0_g1_i2.p1 TRINITY_DN10537_c0_g1~~TRINITY_DN10537_c0_g1_i2.p1 ORF type:5prime_partial len:826 (+),score=211.04 TRINITY_DN10537_c0_g1_i2:2-2479(+)	4.69	442.4	7	7	0	5.82	825	TRINITY_DN10537_c0_g1_i2.p1	TRINITY_DN10537_c0_g1_i2	GSLG1_MOUSE^GSLG1_MOUSE^Q:2-2476,H:345-1175^43.163%ID^E:0^RecName: Full	Golgi apparatus protein 1	GSLG1_MOUSE^GSLG1_MOUSE^Q:1-825,H:345-1175^43.163%ID^E:0^RecName: Full=Golgi apparatus protein 1;^Eukaryota; Metazoa; Chordata; Craniata; Vertebrata; Euteleostomi; Mammalia; Eutheria; Euarchontoglires; Glires; Rodentia; Myomorpha; Muroidea; Muridae; Murinae; Mus; Mus	tr|A0A3M6T523|A0A3M6T523_9CNID^tr|A0A3M6T523|A0A3M6T523_9CNID^Q:1549-23,H:1-508^64.875%ID^E:0^.^.	ExpAA=22.45^PredHel=1^Topology=o792-814i	ENOG410XNWV^Golgi glycoprotein 1	KEGG:mmu:20340`KO:K06816	GO:0030054^cellular_component^cell junction`GO:0005856^cellular_component^cytoskeleton`GO:0031012^cellular_component^extracellular matrix`GO:0005794^cellular_component^Golgi apparatus`GO:0005797^cellular_component^Golgi medial cisterna`GO:0000139^cellular_component^Golgi membrane`GO:0016021^cellular_component^integral component of membrane`GO:0043231^cellular_component^intracellular membrane-boun…	GO:0030054^cellular_component^cell junction`GO:0005856^cellular_component^cytoskeleton`GO:0031012^cellular_component^extracellular matrix`GO:0005794^cellular_component^Golgi apparatus`GO:0005797^cellular_component^Golgi medial cisterna`GO:0000139^cellular_component^Golgi membrane`GO:0016021^cellular_component^integral component of membrane`GO:0043231^cellular_component^intracellular membrane-boun…	GO:0005856;GO:0031012;GO:0005794;GO:0005797;GO:0000139;GO:0000139;GO:0016021;GO:0043231;GO:0005886;GO:0045202;GO:0017134;GO:0060349;GO:0010955;GO:0030512;GO:0032330;	N	FALSE	FALSE	6.90909	5.93939	8.12121	9.21212	3.15152	4.72727	3.15152	4.9697	10.9091	8.24242	3.51515	3.0303	2.78788	3.15152	5.81818	4.24242	3.39394	5.69697	0.363636	2.66667	100	17.3333	6.18182
>TRINITY_DN107186_c0_g1_i1.p1 TRINITY_DN107186_c0_g1~~TRINITY_DN107186_c0_g1_i1.p1 ORF type:internal len:155 (-),score=9.88 TRINITY_DN107186_c0_g1_i1:3-464(-)	1.49	353.8	19	2	1	6.49	154	TRINITY_DN107186_c0_g1_i1.p1	TRINITY_DN107186_c0_g1_i1	no blast hit	no blast hit	.	.	.	.	.	.	.		N	FALSE	FALSE	9.09091	1.2987	11.039	5.84416	2.5974	8.44156	2.5974	7.14286	3.8961	7.14286	0	2.5974	7.14286	1.94805	5.84416	7.14286	5.19481	7.14286	0.649351	3.24675	100	16.8831	6.49351
>TRINITY_DN10851_c0_g1_i2.p1 TRINITY_DN10851_c0_g1~~TRINITY_DN10851_c0_g1_i2.p1 ORF type:3prime_partial len:384 (-),score=94.89 TRINITY_DN10851_c0_g1_i2:1-1149(-)	6.24	390	3	3	0	7.83	383	TRINITY_DN10851_c0_g1_i2.p1	TRINITY_DN10851_c0_g1_i2	no blast hit	no blast hit	.	.	.	.	.	.	.		N	FALSE	+	5.22193	1.30548	5.22193	12.7937	1.04439	3.39426	2.08877	3.13316	9.13838	11.2272	1.30548	4.69974	0.78329	6.26632	7.5718	11.4883	5.48303	4.69974	0.522193	2.61097	100	18.0157	4.17755
>TRINITY_DN10980_c0_g1_i3.p1 TRINITY_DN10980_c0_g1~~TRINITY_DN10980_c0_g1_i3.p1 ORF type:complete len:669 (-),score=84.24 TRINITY_DN10980_c0_g1_i3:277-2283(-)	16.25	577.9	7	7	0	10.93	668	TRINITY_DN10980_c0_g1_i3.p1	TRINITY_DN10980_c0_g1_i3	LOX5_HUMAN^LOX5_HUMAN^Q:1662-580,H:222-569^28.61%ID^E:1.04e-35^RecName: Full	Arachidonate 5-lipoxygenase	LOX5_MESAU^LOX5_MESAU^Q:208-666,H:221-671^27.004%ID^E:2.61e-38^RecName: Full=Arachidonate 5-lipoxygenase;^Eukaryota; Metazoa; Chordata; Craniata; Vertebrata; Euteleostomi; Mammalia; Eutheria; Euarchontoglires; Glires; Rodentia; Myomorpha; Muroidea; Cricetidae; Cricetinae; Mesocricetus	tr|A0A2B4S5Z9|A0A2B4S5Z9_STYPI^tr|A0A2B4S5Z9|A0A2B4S5Z9_STYPI^Q:1443-316,H:1-376^84.84%ID^E:0^.^.	ExpAA=20.01^PredHel=1^Topology=i7-24o	ENOG410YN4N^Plant lipoxygenase may be involved in a number of diverse aspects of plant physiology including growth and development, pest resistance, and senescence or responses to wounding (By similarity)	KEGG:hsa:240`KO:K00461	GO:0005829^cellular_component^cytosol`GO:0005576^cellular_component^extracellular region`GO:0005615^cellular_component^extracellular space`GO:1904813^cellular_component^ficolin-1-rich granule lumen`GO:0005635^cellular_component^nuclear envelope`GO:0005641^cellular_component^nuclear envelope lumen`GO:0016363^cellular_component^nuclear matrix`GO:0031965^cellular_component^nuclear membrane`GO:000565…	GO:0005829^cellular_component^cytosol`GO:0005641^cellular_component^nuclear envelope lumen`GO:0016363^cellular_component^nuclear matrix`GO:0031965^cellular_component^nuclear membrane`GO:0004051^molecular_function^arachidonate 5-lipoxygenase activity`GO:0005506^molecular_function^iron ion binding`GO:0019370^biological_process^leukotriene biosynthetic process	GO:0005641;GO:0016363;GO:0031965;GO:0004051;GO:0005506;GO:0005506;GO:0019370;	N	+	FALSE	6.73653	1.1976	7.03593	5.08982	4.04192	6.43713	1.94611	5.53892	5.38922	11.6766	3.29341	3.74251	4.64072	5.53892	4.19162	5.83832	5.98802	7.18563	0.898204	3.59281	100	12.1257	8.53293	SP(Sec/SPI)	0.733447	0.266553	CS pos: 24-25. VVA-GK. Pr: 0.3618
>TRINITY_DN11012_c0_g1_i1.p1 TRINITY_DN11012_c0_g1~~TRINITY_DN11012_c0_g1_i1.p1 ORF type:5prime_partial len:1057 (-),score=232.76 TRINITY_DN11012_c0_g1_i1:117-3287(-)	10.11	585.7	6	5	0	3.79	1056	TRINITY_DN11012_c0_g1_i1.p1	TRINITY_DN11012_c0_g1_i1	SCUB1_MOUSE^SCUB1_MOUSE^Q:2516-1965,H:258-434^41.304%ID^E:1.2e-28^RecName: Full	Signal peptide, CUB and EGF-like domain-containing protein 1	SCUB1_MOUSE^SCUB1_MOUSE^Q:258-441,H:258-434^41.304%ID^E:7.44e-29^RecName: Full=Signal peptide, CUB and EGF-like domain-containing protein 1;^Eukaryota; Metazoa; Chordata; Craniata; Vertebrata; Euteleostomi; Mammalia; Eutheria; Euarchontoglires; Glires; Rodentia; Myomorpha; Muroidea; Muridae; Murinae; Mus; Mus	tr|A0A2B4R8V5|A0A2B4R8V5_STYPI^tr|A0A2B4R8V5|A0A2B4R8V5_STYPI^Q:622-945,H:870-977^41.818%ID^E:2.74e-14^.^.	.	ENOG411030G^Signal peptide, CUB domain, EGF-like	KEGG:mmu:64706	GO:0009986^cellular_component^cell surface`GO:0009897^cellular_component^external side of plasma membrane`GO:0005615^cellular_component^extracellular space`GO:0019897^cellular_component^extrinsic component of plasma membrane`GO:0005509^molecular_function^calcium ion binding`GO:0042802^molecular_function^identical protein binding`GO:0046982^molecular_function^protein heterodimerization activity`GO…	GO:0009986^cellular_component^cell surface`GO:0009897^cellular_component^external side of plasma membrane`GO:0005615^cellular_component^extracellular space`GO:0019897^cellular_component^extrinsic component of plasma membrane`GO:0005509^molecular_function^calcium ion binding`GO:0042802^molecular_function^identical protein binding`GO:0046982^molecular_function^protein heterodimerization activity`GO…	GO:0009897;GO:0005615;GO:0019897;GO:0005509;GO:0042802;GO:0042802;GO:0046982;GO:0045880;GO:0051260;	N	FALSE	FALSE	6.06061	6.91288	6.43939	5.01894	3.2197	8.04924	1.89394	3.97727	4.54545	4.92424	1.42045	6.1553	5.39773	4.92424	3.78788	7.38636	7.29167	7.19697	1.32576	4.07197	100	11.4583	8.61742
>TRINITY_DN11163_c0_g1_i1.p1 TRINITY_DN11163_c0_g1~~TRINITY_DN11163_c0_g1_i1.p1 ORF type:5prime_partial len:926 (+),score=134.01 TRINITY_DN11163_c0_g1_i1:2-2779(+)	5.08	578	6	5	0	5.73	925	TRINITY_DN11163_c0_g1_i1.p1	TRINITY_DN11163_c0_g1_i1	no blast hit	no blast hit	.	tr|A0A3M6UMH7|A0A3M6UMH7_9CNID^tr|A0A3M6UMH7|A0A3M6UMH7_9CNID^Q:182-1159,H:24-347^70.336%ID^E:2.9e-160^.^.	.	.	.	.	.		N	FALSE	FALSE	6.27027	2.16216	4.97297	5.94595	4.64865	8.64865	1.94595	5.51351	5.2973	8.43243	3.02703	4.10811	6.27027	4.10811	3.45946	6.7027	5.83784	7.24324	1.18919	4.21622	100	10.9189	10.0541
>TRINITY_DN11251_c0_g1_i1.p1 TRINITY_DN11251_c0_g1~~TRINITY_DN11251_c0_g1_i1.p1 ORF type:internal len:503 (+),score=126.32 TRINITY_DN11251_c0_g1_i1:3-1508(+)	3.24	462.8	2	2	0	4.58	502	TRINITY_DN11251_c0_g1_i1.p1	TRINITY_DN11251_c0_g1_i1	CADN_ACRMI^CADN_ACRMI^Q:3-1448,H:658-1142^29.779%ID^E:7.69e-39^RecName: Full	Coadhesin {ECO:0000303|PubMed:23765379}	CADN_ACRMI^CADN_ACRMI^Q:1-482,H:658-1142^29.779%ID^E:1.63e-50^RecName: Full=Coadhesin {ECO:0000303|PubMed:23765379};^Eukaryota; Metazoa; Cnidaria; Anthozoa; Hexacorallia; Scleractinia; Astrocoeniina; Acroporidae; Acropora	tr|A0A2B4SXE2|A0A2B4SXE2_STYPI^tr|A0A2B4SXE2|A0A2B4SXE2_STYPI^Q:117-806,H:1-277^37.241%ID^E:8.56e-42^.^.	.	.	.	GO:0016021^cellular_component^integral component of membrane	GO:0016021^cellular_component^integral component of membrane		N	FALSE	FALSE	10.1594	0	7.17131	11.3546	3.18725	8.36653	0.199203	6.3745	7.96813	7.96813	1.99203	1.79283	2.39044	1.59363	5.77689	8.56574	3.38645	10.757	0.199203	0.796813	100	18.5259	4.18327
>TRINITY_DN11579_c0_g1_i2.p1 TRINITY_DN11579_c0_g1~~TRINITY_DN11579_c0_g1_i2.p1 ORF type:complete len:344 (-),score=37.76 TRINITY_DN11579_c0_g1_i2:153-1184(-)	13.77	424.6	13	9	1	27.99	343	TRINITY_DN11579_c0_g1_i2.p1	TRINITY_DN11579_c0_g1_i2	TSP1_XENLA^TSP1_XENLA^Q:1112-966,H:438-486^53.061%ID^E:3.11e-12^RecName: Full	Thrombospondin-1	TSP1_MOUSE^TSP1_MOUSE^Q:25-77,H:435-485^52.83%ID^E:6.52e-12^RecName: Full=Thrombospondin-1;^Eukaryota; Metazoa; Chordata; Craniata; Vertebrata; Euteleostomi; Mammalia; Eutheria; Euarchontoglires; Glires; Rodentia; Myomorpha; Muroidea; Muridae; Murinae; Mus; Mus	.	.	ENOG410XQKE^thrombospondin	.	GO:0009986^cellular_component^cell surface`GO:0005783^cellular_component^endoplasmic reticulum`GO:0031012^cellular_component^extracellular matrix`GO:0005615^cellular_component^extracellular space`GO:0016529^cellular_component^sarcoplasmic reticulum`GO:0005509^molecular_function^calcium ion binding`GO:0050840^molecular_function^extracellular matrix binding`GO:0008201^molecular_function^heparin bin…	GO:0009986^cellular_component^cell surface`GO:0062023^cellular_component^collagen-containing extracellular matrix`GO:0005737^cellular_component^cytoplasm`GO:0005783^cellular_component^endoplasmic reticulum`GO:0009897^cellular_component^external side of plasma membrane`GO:0031012^cellular_component^extracellular matrix`GO:0005615^cellular_component^extracellular space`GO:0005577^cellular_component…	GO:0062023;GO:0005737;GO:0005783;GO:0009897;GO:0031012;GO:0031012;GO:0005615;GO:0005577;GO:0031091;GO:0016529;GO:0030141;GO:0005509;GO:0070052;GO:0050840;GO:0070051;GO:0017134;GO:0001968;GO:0008201;GO:0005178;GO:0043236;GO:0030169;GO:0001786;GO:0050431;GO:0000187;GO:0048266;GO:0048514;GO:0007155;GO:0007050;GO:0016477;GO:0071732;GO:0003197;GO:0043652;GO:0003417;GO:0006954;GO:0016525;GO:0002581;GO:…	N	+	FALSE	8.16327	4.37318	4.08163	3.49854	2.91545	7.28863	1.74927	3.79009	12.2449	7.87172	1.45773	3.79009	4.37318	3.207	7.87172	5.24781	4.95627	9.0379	1.45773	2.62391	100	7.58017	6.99708	SP(Sec/SPI)	0.999601	0.000399	CS pos: 21-22. TNA-ED. Pr: 0.7767
>TRINITY_DN11748_c0_g1_i1.p1 TRINITY_DN11748_c0_g1~~TRINITY_DN11748_c0_g1_i1.p1 ORF type:internal len:519 (+),score=88.12 TRINITY_DN11748_c0_g1_i1:1-1554(+)	19.14	794.6	4	3	0	6.56	518	TRINITY_DN11748_c0_g1_i1.p1	TRINITY_DN11748_c0_g1_i1	TLL1_MOUSE^TLL1_MOUSE^Q:175-1323,H:461-882^31.616%ID^E:6.09e-66^RecName: Full	Tolloid-like protein 1	TLL1_MOUSE^TLL1_MOUSE^Q:59-441,H:461-882^31.382%ID^E:2.86e-66^RecName: Full=Tolloid-like protein 1;^Eukaryota; Metazoa; Chordata; Craniata; Vertebrata; Euteleostomi; Mammalia; Eutheria; Euarchontoglires; Glires; Rodentia; Myomorpha; Muroidea; Muridae; Murinae; Mus; Mus	tr|A0A3M6UUN4|A0A3M6UUN4_9CNID^tr|A0A3M6UUN4|A0A3M6UUN4_9CNID^Q:3-452,H:174-323^45.695%ID^E:1.25e-36^.^.	.	ENOG410ZPX7^Meprin A	.	GO:0005576^cellular_component^extracellular region`GO:0005509^molecular_function^calcium ion binding`GO:0005518^molecular_function^collagen binding`GO:0004222^molecular_function^metalloendopeptidase activity`GO:0008270^molecular_function^zinc ion binding`GO:0030154^biological_process^cell differentiation`GO:0007275^biological_process^multicellular organism development	GO:0005576^cellular_component^extracellular region`GO:0005509^molecular_function^calcium ion binding`GO:0005518^molecular_function^collagen binding`GO:0004222^molecular_function^metalloendopeptidase activity`GO:0008270^molecular_function^zinc ion binding`GO:0030154^biological_process^cell differentiation`GO:0007275^biological_process^multicellular organism development	GO:0005509;GO:0005518;GO:0004222;GO:0008270;GO:0030154;GO:0030154;GO:0007275;	N	FALSE	FALSE	5.98456	2.50965	3.861	7.52896	5.40541	9.45946	1.1583	3.4749	4.2471	5.40541	0.772201	3.861	8.30116	3.28185	4.44015	9.84556	9.45946	5.21236	2.3166	3.4749	100	11.39	11.1969
>TRINITY_DN134_c0_g2_i1.p1 TRINITY_DN134_c0_g2~~TRINITY_DN134_c0_g2_i1.p1 ORF type:5prime_partial len:1793 (-),score=565.08 TRINITY_DN134_c0_g2_i1:831-6209(-)	38.85	654.3	19	16	1	9.04	1792	TRINITY_DN134_c0_g2_i1.p1	TRINITY_DN134_c0_g2_i1	SPTB2_HUMAN^SPTB2_HUMAN^Q:6209-1515,H:520-2075^44.608%ID^E:0^RecName: Full	Spectrin beta chain, non-erythrocytic 1	SPTB2_HUMAN^SPTB2_HUMAN^Q:2-1532,H:758-2305^41.501%ID^E:0^RecName: Full=Spectrin beta chain, non-erythrocytic 1;^Eukaryota; Metazoa; Chordata; Craniata; Vertebrata; Euteleostomi; Mammalia; Eutheria; Euarchontoglires; Primates; Haplorrhini; Catarrhini; Hominidae; Homo	tr|A0A3M6TMB2|A0A3M6TMB2_9CNID^tr|A0A3M6TMB2|A0A3M6TMB2_9CNID^Q:1883-978,H:23-322^87.417%ID^E:8.89e-122^.^.	.	COG5069^Microtubule associated monoxygenase, calponin and LIM domain containing	KEGG:hsa:6711`KO:K06115	GO:0030673^cellular_component^axolemma`GO:0032437^cellular_component^cuticular plate`GO:0005737^cellular_component^cytoplasm`GO:0005829^cellular_component^cytosol`GO:0070062^cellular_component^extracellular exosome`GO:0098978^cellular_component^glutamatergic synapse`GO:0031430^cellular_component^M band`GO:0005730^cellular_component^nucleolus`GO:0014069^cellular_component^postsynaptic density`GO:0…	GO:0030673^cellular_component^axolemma`GO:0032437^cellular_component^cuticular plate`GO:0005737^cellular_component^cytoplasm`GO:0005829^cellular_component^cytosol`GO:0070062^cellular_component^extracellular exosome`GO:0098978^cellular_component^glutamatergic synapse`GO:0031430^cellular_component^M band`GO:0005730^cellular_component^nucleolus`GO:0014069^cellular_component^postsynaptic density`GO:0…	GO:0032437;GO:0005737;GO:0005829;GO:0070062;GO:0098978;GO:0098978;GO:0031430;GO:0005730;GO:0014069;GO:0008091;GO:0014731;GO:0003779;GO:0030506;GO:0045296;GO:0005516;GO:0051020;GO:0005543;GO:0044877;GO:0003723;GO:0005200;GO:0051693;GO:0007411;GO:0007182;GO:0006888;GO:0043001;GO:0000165;GO:0071709;GO:0000281;GO:0007009;GO:1900042;GO:1903078;GO:0072659;GO:1903076;GO:0060390	N	FALSE	FALSE	9.04018	0.613839	7.97991	13.3371	2.00893	3.23661	2.73438	4.40848	7.47768	10.5469	2.45536	4.07366	1.45089	6.36161	6.69643	5.41295	3.51562	4.85491	1.6183	2.17634	100	21.317	5.80357
>TRINITY_DN14331_c0_g1_i1.p1 TRINITY_DN14331_c0_g1~~TRINITY_DN14331_c0_g1_i1.p1 ORF type:complete len:250 (+),score=88.24 TRINITY_DN14331_c0_g1_i1:121-870(+)	6.19	567.5	5	5	1	16.87	249	TRINITY_DN14331_c0_g1_i1.p1	TRINITY_DN14331_c0_g1_i1	TPM2_PODCA^TPM2_PODCA^Q:133-831,H:6-238^30.472%ID^E:7.83e-13^RecName: Full	Tropomyosin-2	TPM1_HYDVU^TPM1_HYDVU^Q:5-247,H:9-250^28.862%ID^E:8.67e-15^RecName: Full=Tropomyosin-1;^Eukaryota; Metazoa; Cnidaria; Hydrozoa; Hydroidolina; Anthoathecata; Aplanulata; Hydridae; Hydra	.	.	.	KEGG:hmg:100215665	.	.		N	+	FALSE	8.03213	0.803213	10.8434	16.4659	1.20482	2.40964	0.803213	2.40964	12.0482	9.63855	2.40964	3.21285	0	8.03213	5.62249	4.81928	4.01606	6.0241	0.803213	0.401606	100	27.3092	2.40964	OTHER	0.000291	0.999709
>TRINITY_DN1504_c0_g1_i2.p1 TRINITY_DN1504_c0_g1~~TRINITY_DN1504_c0_g1_i2.p1 ORF type:5prime_partial len:580 (+),score=77.84 TRINITY_DN1504_c0_g1_i2:3-1742(+)	23.14	771.4	9	6	0	11.23	579	TRINITY_DN1504_c0_g1_i2.p1	TRINITY_DN1504_c0_g1_i2	MATN1_HUMAN^MATN1_HUMAN^Q:186-1427,H:33-412^25.059%ID^E:4.2e-16^RecName: Full	Cartilage matrix protein	MATN1_HUMAN^MATN1_HUMAN^Q:62-475,H:33-412^25.06%ID^E:1.1e-18^RecName: Full=Cartilage matrix protein;^Eukaryota; Metazoa; Chordata; Craniata; Vertebrata; Euteleostomi; Mammalia; Eutheria; Euarchontoglires; Primates; Haplorrhini; Catarrhini; Hominidae; Homo	.	.	ENOG410XSCQ^growth plate cartilage chondrocyte morphogenesis	KEGG:hsa:4146	GO:0062023^cellular_component^collagen-containing extracellular matrix`GO:0031012^cellular_component^extracellular matrix`GO:0005576^cellular_component^extracellular region`GO:0005615^cellular_component^extracellular space`GO:0005509^molecular_function^calcium ion binding`GO:0005201^molecular_function^extracellular matrix structural constituent`GO:0030198^biological_process^extracellular matrix o…	GO:0062023^cellular_component^collagen-containing extracellular matrix`GO:0031012^cellular_component^extracellular matrix`GO:0005576^cellular_component^extracellular region`GO:0005615^cellular_component^extracellular space`GO:0005509^molecular_function^calcium ion binding`GO:0005201^molecular_function^extracellular matrix structural constituent`GO:0030198^biological_process^extracellular matrix o…	GO:0031012;GO:0005576;GO:0005615;GO:0005509;GO:0005201;GO:0005201;GO:0030198;GO:0003429;GO:0065003;GO:0030500	N	FALSE	FALSE	6.04491	2.9361	6.04491	7.4266	4.14508	7.94473	2.07254	6.04491	5.52677	7.25389	1.38169	3.97237	5.69948	4.83592	6.56304	5.87219	5.87219	6.90846	1.20898	2.24525	100	13.4715	7.59931
>TRINITY_DN15317_c0_g1_i3.p1 TRINITY_DN15317_c0_g1~~TRINITY_DN15317_c0_g1_i3.p1 ORF type:5prime_partial len:393 (+),score=101.30 TRINITY_DN15317_c0_g1_i3:1-1179(+)	6.1	570.1	4	3	1	8.16	392	TRINITY_DN15317_c0_g1_i3.p1	TRINITY_DN15317_c0_g1_i3	no blast hit	no blast hit	.	.	ExpAA=23.99^PredHel=1^Topology=i12-34o	.	.	.	.		N	FALSE	FALSE	8.41837	1.78571	6.37755	12.2449	4.33673	9.94898	2.55102	4.84694	9.18367	9.18367	3.06122	2.80612	2.04082	2.80612	5.35714	3.31633	3.82653	5.86735	0.255102	1.78571	100	18.6224	6.37755
>TRINITY_DN16272_c0_g1_i2.p1 TRINITY_DN16272_c0_g1~~TRINITY_DN16272_c0_g1_i2.p1 ORF type:5prime_partial len:250 (-),score=37.12 TRINITY_DN16272_c0_g1_i2:187-936(-)	3.28	369.9	2	2	0	4.42	249	TRINITY_DN16272_c0_g1_i2.p1	TRINITY_DN16272_c0_g1_i2	no blast hit	no blast hit	.	.	ExpAA=17.02^PredHel=1^Topology=i19-36o	.	.	.	.		N	FALSE	FALSE	2.40964	0.803213	1.60643	4.41767	1.20482	1.20482	9.63855	5.22088	12.0482	2.40964	0.803213	2.00803	11.245	1.20482	5.22088	1.60643	4.81928	23.2932	0.803213	8.03213	100	6.0241	10.0402
>TRINITY_DN16632_c0_g1_i1.p1 TRINITY_DN16632_c0_g1~~TRINITY_DN16632_c0_g1_i1.p1 ORF type:5prime_partial len:150 (-),score=35.57 TRINITY_DN16632_c0_g1_i1:66-515(-)	1.74	429.4	2	2	0	10.74	149	TRINITY_DN16632_c0_g1_i1.p1	TRINITY_DN16632_c0_g1_i1	RL28_RAT^RL28_RAT^Q:479-81,H:1-132^45.865%ID^E:2.79e-36^RecName: Full	60S ribosomal protein L28	RL28_RAT^RL28_RAT^Q:13-145,H:1-132^45.865%ID^E:1.58e-36^RecName: Full=60S ribosomal protein L28;^Eukaryota; Metazoa; Chordata; Craniata; Vertebrata; Euteleostomi; Mammalia; Eutheria; Euarchontoglires; Glires; Rodentia; Myomorpha; Muroidea; Muridae; Murinae; Rattus	.	.	ENOG4111T32^protein complex subunit organization	.	GO:0044297^cellular_component^cell body`GO:0036464^cellular_component^cytoplasmic ribonucleoprotein granule`GO:0022625^cellular_component^cytosolic large ribosomal subunit`GO:0030425^cellular_component^dendrite`GO:0003735^molecular_function^structural constituent of ribosome`GO:0006412^biological_process^translation	GO:0044297^cellular_component^cell body`GO:0036464^cellular_component^cytoplasmic ribonucleoprotein granule`GO:0022625^cellular_component^cytosolic large ribosomal subunit`GO:0030425^cellular_component^dendrite`GO:0003735^molecular_function^structural constituent of ribosome`GO:0006412^biological_process^translation	GO:0036464;GO:0022625;GO:0030425;GO:0003735;GO:0006412;GO:0006412	N	FALSE	FALSE	5.36913	2.68456	2.68456	2.01342	3.3557	5.36913	1.34228	3.3557	13.4228	7.38255	4.02685	8.72483	2.68456	2.68456	9.39597	9.39597	6.04027	7.38255	1.34228	1.34228	100	4.69799	6.04027
>TRINITY_DN168_c1_g1_i1.p1 TRINITY_DN168_c1_g1~~TRINITY_DN168_c1_g1_i1.p1 ORF type:complete len:369 (+),score=77.55 TRINITY_DN168_c1_g1_i1:70-1176(+)	2.25	434.1	6	4	0	11.41	368	TRINITY_DN168_c1_g1_i1.p1	TRINITY_DN168_c1_g1_i1	GELS1_LUMTE^GELS1_LUMTE^Q:67-1164,H:1-362^54.496%ID^E:4.49e-134^RecName: Full	Gelsolin-like protein 1	GELS1_LUMTE^GELS1_LUMTE^Q:2-365,H:3-362^54.795%ID^E:6.83e-135^RecName: Full=Gelsolin-like protein 1;^Eukaryota; Metazoa; Lophotrochozoa; Annelida; Clitellata; Oligochaeta; Haplotaxida; Lumbricina; Lumbricidae; Lumbricinae; Lumbricus	.	.	.	.	GO:0005737^cellular_component^cytoplasm`GO:0005856^cellular_component^cytoskeleton`GO:0003779^molecular_function^actin binding`GO:0051015^molecular_function^actin filament binding`GO:0005509^molecular_function^calcium ion binding`GO:0051693^biological_process^actin filament capping`GO:0030043^biological_process^actin filament fragmentation`GO:0030041^biological_process^actin filament polymerizati…	GO:0005737^cellular_component^cytoplasm`GO:0005856^cellular_component^cytoskeleton`GO:0003779^molecular_function^actin binding`GO:0051015^molecular_function^actin filament binding`GO:0005509^molecular_function^calcium ion binding`GO:0051693^biological_process^actin filament capping`GO:0030043^biological_process^actin filament fragmentation`GO:0030041^biological_process^actin filament polymerizati…	GO:0005856;GO:0003779;GO:0051015;GO:0005509;GO:0051693;GO:0051693;GO:0030043;GO:0030041;GO:0051014;GO:0045010;GO:0007275;	N	+	FALSE	4.34783	0.543478	8.42391	8.15217	4.8913	6.79348	2.17391	3.53261	10.3261	7.06522	1.63043	4.07609	3.53261	4.8913	5.16304	5.97826	4.8913	6.79348	2.17391	4.61957	100	16.5761	11.6848	OTHER	0.00075	0.99925
>TRINITY_DN16950_c0_g1_i1.p1 TRINITY_DN16950_c0_g1~~TRINITY_DN16950_c0_g1_i1.p1 ORF type:internal len:381 (-),score=48.02 TRINITY_DN16950_c0_g1_i1:2-1141(-)	17.03	739	6	6	0	15.26	380	TRINITY_DN16950_c0_g1_i1.p1	TRINITY_DN16950_c0_g1_i1	COCA1_MOUSE^COCA1_MOUSE^Q:1051-503,H:1199-1376^32.258%ID^E:1.15e-20^RecName: Full	Collagen alpha-1(XII) chain	COCA1_MOUSE^COCA1_MOUSE^Q:31-213,H:1199-1376^32.258%ID^E:1.03e-20^RecName: Full=Collagen alpha-1(XII) chain;^Eukaryota; Metazoa; Chordata; Craniata; Vertebrata; Euteleostomi; Mammalia; Eutheria; Euarchontoglires; Glires; Rodentia; Myomorpha; Muroidea; Muridae; Murinae; Mus; Mus	.	.	ENOG4111RUM^collagen, type XII, alpha 1	KEGG:mmu:12816`KO:K08132	GO:0005595^cellular_component^collagen type XII trimer`GO:0062023^cellular_component^collagen-containing extracellular matrix`GO:0031012^cellular_component^extracellular matrix`GO:0005615^cellular_component^extracellular space`GO:0007155^biological_process^cell adhesion`GO:0035987^biological_process^endodermal cell differentiation`GO:0003429^biological_process^growth plate cartilage chondrocyte m…	GO:0005595^cellular_component^collagen type XII trimer`GO:0062023^cellular_component^collagen-containing extracellular matrix`GO:0031012^cellular_component^extracellular matrix`GO:0005615^cellular_component^extracellular space`GO:0007155^biological_process^cell adhesion`GO:0035987^biological_process^endodermal cell differentiation`GO:0003429^biological_process^growth plate cartilage chondrocyte m…	GO:0062023;GO:0031012;GO:0005615;GO:0007155;GO:0035987;GO:0035987;GO:0003429;	N	FALSE	FALSE	5.52632	4.21053	6.05263	7.36842	3.15789	8.15789	0.789474	6.57895	5.78947	6.05263	1.31579	5.78947	3.68421	1.84211	6.57895	7.63158	7.89474	8.42105	1.05263	2.10526	100	13.4211	6.31579
>TRINITY_DN18094_c0_g1_i1.p1 TRINITY_DN18094_c0_g1~~TRINITY_DN18094_c0_g1_i1.p1 ORF type:5prime_partial len:515 (-),score=57.18 TRINITY_DN18094_c0_g1_i1:160-1704(-)	7.22	427.7	4	4	0	7.59	514	TRINITY_DN18094_c0_g1_i1.p1	TRINITY_DN18094_c0_g1_i1	PERO_DROME^PERO_DROME^Q:1704-163,H:154-687^35.978%ID^E:8.21e-91^RecName: Full	Peroxidase	PERO_DROME^PERO_DROME^Q:1-514,H:154-687^35.978%ID^E:1.6e-91^RecName: Full=Peroxidase;^Eukaryota; Metazoa; Ecdysozoa; Arthropoda; Hexapoda; Insecta; Pterygota; Neoptera; Holometabola; Diptera; Brachycera; Muscomorpha; Ephydroidea; Drosophilidae; Drosophila; Sophophora	.	.	ENOG410XPZ3^prostaglandin G H synthase and cyclooxygenase	KEGG:dme:Dmel_CG3477`KO:K19511	GO:0042600^cellular_component^chorion`GO:0005576^cellular_component^extracellular region`GO:0020037^molecular_function^heme binding`GO:0046872^molecular_function^metal ion binding`GO:0004601^molecular_function^peroxidase activity`GO:0007306^biological_process^eggshell chorion assembly`GO:0042744^biological_process^hydrogen peroxide catabolic process`GO:0018149^biological_process^peptide cross-lin…	GO:0042600^cellular_component^chorion`GO:0005576^cellular_component^extracellular region`GO:0020037^molecular_function^heme binding`GO:0046872^molecular_function^metal ion binding`GO:0004601^molecular_function^peroxidase activity`GO:0007306^biological_process^eggshell chorion assembly`GO:0042744^biological_process^hydrogen peroxide catabolic process`GO:0018149^biological_process^peptide cross-lin…	GO:0005576;GO:0020037;GO:0046872;GO:0004601;GO:0007306;GO:0007306;GO:0042744;GO:0018149;GO:0018212;GO:0006979	N	FALSE	FALSE	6.22568	2.14008	6.61479	5.83658	5.44747	7.58755	2.72374	6.42023	0.77821	8.94942	3.30739	5.44747	7.00389	3.6965	9.53307	5.25292	5.83658	3.6965	0.972763	2.52918	100	12.4514	8.94942
>TRINITY_DN1943_c0_g1_i24.p1 TRINITY_DN1943_c0_g1~~TRINITY_DN1943_c0_g1_i24.p1 ORF type:5prime_partial len:398 (+),score=77.73 TRINITY_DN1943_c0_g1_i24:3-1196(+)	10.8	613.1	4	3	0	6.05	397	TRINITY_DN1943_c0_g1_i24.p1	TRINITY_DN1943_c0_g1_i24	TYRO_STRGA^TYRO_STRGA^Q:279-926,H:3-227^31.818%ID^E:3.49e-21^RecName: Full	Tyrosinase	TYRO_STRGA^TYRO_STRGA^Q:93-308,H:3-227^31.818%ID^E:1.82e-21^RecName: Full=Tyrosinase;^Bacteria; Actinobacteria; Streptomycetales; Streptomycetaceae; Streptomyces	.	.	.	.	GO:0046872^molecular_function^metal ion binding`GO:0004503^molecular_function^monophenol monooxygenase activity`GO:0042438^biological_process^melanin biosynthetic process	GO:0046872^molecular_function^metal ion binding`GO:0004503^molecular_function^monophenol monooxygenase activity`GO:0042438^biological_process^melanin biosynthetic process	GO:0004503;GO:0042438	N	FALSE	FALSE	9.06801	2.77078	6.29723	8.31234	6.54912	6.54912	3.27456	4.78589	5.79345	4.78589	2.267	3.77834	5.28967	3.52645	5.03778	6.04534	5.03778	5.54156	2.77078	2.51889	100	14.6096	11.8388
>TRINITY_DN19495_c1_g2_i2.p1 TRINITY_DN19495_c1_g2~~TRINITY_DN19495_c1_g2_i2.p1 ORF type:complete len:220 (+),score=23.56 TRINITY_DN19495_c1_g2_i2:250-909(+)	27.88	734.6	5	4	0	29.22	219	TRINITY_DN19495_c1_g2_i2.p1	TRINITY_DN19495_c1_g2_i2	XP4_XENLA^XP4_XENLA^Q:304-744,H:72-217^38.667%ID^E:9.7e-23^RecName: Full	Putative gastrointestinal growth factor xP4	XP4_XENLA^XP4_XENLA^Q:1-219,H:5-220^31.718%ID^E:3.22e-27^RecName: Full=Putative gastrointestinal growth factor xP4;^Eukaryota; Metazoa; Chordata; Craniata; Vertebrata; Euteleostomi; Amphibia; Batrachia; Anura; Pipoidea; Pipidae; Xenopodinae; Xenopus; Xenopus	.	.	.	KEGG:xla:378510	GO:0005576^cellular_component^extracellular region`GO:0008083^molecular_function^growth factor activity	GO:0005576^cellular_component^extracellular region`GO:0008083^molecular_function^growth factor activity	GO:0008083;	N	+	FALSE	8.21918	11.4155	9.58904	9.13242	3.19635	10.0457	0.456621	2.73973	2.73973	2.73973	0.456621	3.19635	7.76256	6.39269	2.73973	3.65297	5.02283	4.56621	4.10959	1.82648	100	18.7215	9.13242	SP(Sec/SPI)	0.99933	0.00067	CS pos: 18-19. IQA-DD. Pr: 0.9826
>TRINITY_DN20198_c0_g1_i1.p1 TRINITY_DN20198_c0_g1~~TRINITY_DN20198_c0_g1_i1.p1 ORF type:complete len:562 (-),score=150.60 TRINITY_DN20198_c0_g1_i1:335-2020(-)	3.38	381.7	4	4	1	6.42	561	TRINITY_DN20198_c0_g1_i1.p1	TRINITY_DN20198_c0_g1_i1	no blast hit	no blast hit	.	.	.	.	.	.	.		N	+	FALSE	7.48663	1.60428	5.88235	9.09091	4.99109	6.41711	1.60428	5.16934	8.7344	9.09091	4.63458	3.0303	3.56506	3.92157	6.06061	4.45633	4.81283	4.99109	1.78253	2.6738	100	14.9733	9.44742	OTHER	0.001453	0.998547
>TRINITY_DN2037_c0_g2_i1.p1 TRINITY_DN2037_c0_g2~~TRINITY_DN2037_c0_g2_i1.p1 ORF type:5prime_partial len:356 (-),score=68.87 TRINITY_DN2037_c0_g2_i1:220-1287(-)	9.2	642.6	3	3	0	5.92	355	TRINITY_DN2037_c0_g2_i1.p1	TRINITY_DN2037_c0_g2_i1	no blast hit	no blast hit	.	tr|A0A2B4SAQ8|A0A2B4SAQ8_STYPI^tr|A0A2B4SAQ8|A0A2B4SAQ8_STYPI^Q:541-2,H:121-300^93.889%ID^E:3.1e-98^.^.	ExpAA=20.70^PredHel=1^Topology=i17-39o	.	.	.	.		N	FALSE	FALSE	7.32394	10.1408	6.47887	11.5493	2.53521	2.53521	1.40845	0.84507	8.16901	7.60563	0.84507	8.4507	4.78873	4.22535	4.50704	5.35211	4.22535	4.78873	2.53521	1.69014	100	18.0282	6.76056
>TRINITY_DN20865_c0_g2_i1.p1 TRINITY_DN20865_c0_g2~~TRINITY_DN20865_c0_g2_i1.p1 ORF type:internal len:180 (+),score=26.04 TRINITY_DN20865_c0_g2_i1:1-537(+)	1.74	345.4	2	2	0	15.08	179	TRINITY_DN20865_c0_g2_i1.p1	TRINITY_DN20865_c0_g2_i1	FBN1_BOVIN^FBN1_BOVIN^Q:1-537,H:1337-1517^44.385%ID^E:8.18e-31^RecName: Full	Fibrillin-1 {ECO:0000250|UniProtKB:P35555}	FBN1_BOVIN^FBN1_BOVIN^Q:1-179,H:1337-1517^44.385%ID^E:7.37e-31^RecName: Full=Fibrillin-1 {ECO:0000250|UniProtKB:P35555};^Eukaryota; Metazoa; Chordata; Craniata; Vertebrata; Euteleostomi; Mammalia; Eutheria; Laurasiatheria; Artiodactyla; Ruminantia; Pecora; Bovidae; Bovinae; Bos	.	.	ENOG410XSTY^Latent transforming growth factor beta binding protein 2	KEGG:bta:281154`KO:K06825	GO:0031012^cellular_component^extracellular matrix`GO:0005576^cellular_component^extracellular region`GO:0005615^cellular_component^extracellular space`GO:0001527^cellular_component^microfibril`GO:0005509^molecular_function^calcium ion binding`GO:0005201^molecular_function^extracellular matrix structural constituent`GO:0008201^molecular_function^heparin binding`GO:0005179^molecular_function^hormo…	GO:0031012^cellular_component^extracellular matrix`GO:0005576^cellular_component^extracellular region`GO:0005615^cellular_component^extracellular space`GO:0001527^cellular_component^microfibril`GO:0005509^molecular_function^calcium ion binding`GO:0005201^molecular_function^extracellular matrix structural constituent`GO:0008201^molecular_function^heparin binding`GO:0005179^molecular_function^hormo…	GO:0005576;GO:0005615;GO:0001527;GO:0005509;GO:0005201;GO:0005201;GO:0008201;GO:0005179;GO:0034199;GO:0042593;GO:0006006;GO:0010737	N	FALSE	FALSE	6.14525	15.0838	11.7318	5.02793	2.23464	12.8492	1.11732	1.11732	3.35196	2.23464	0.558659	6.14525	1.11732	1.11732	5.58659	5.58659	6.70391	8.93855	0	3.35196	100	16.7598	5.58659
>TRINITY_DN2227_c0_g1_i1.p1 TRINITY_DN2227_c0_g1~~TRINITY_DN2227_c0_g1_i1.p1 ORF type:complete len:1943 (+),score=798.56 TRINITY_DN2227_c0_g1_i1:89-5917(+)	67.97	753.2	31	23	2	11.89	1942	TRINITY_DN2227_c0_g1_i1.p1	TRINITY_DN2227_c0_g1_i1	MYS_ARGIR^MYS_ARGIR^Q:107-5755,H:7-1896^53.066%ID^E:0^RecName: Full	Myosin heavy chain, striated muscle	MYS_ARGIR^MYS_ARGIR^Q:7-1913,H:7-1920^53.184%ID^E:0^RecName: Full=Myosin heavy chain, striated muscle;^Eukaryota; Metazoa; Lophotrochozoa; Mollusca; Bivalvia; Pteriomorphia; Pectinoida; Pectinoidea; Pectinidae; Argopecten	tr|A0A3M6UJE9|A0A3M6UJE9_9CNID^tr|A0A3M6UJE9|A0A3M6UJE9_9CNID^Q:956-738,H:1-73^68.493%ID^E:2.81e-29^.^.	.	.	.	GO:0030016^cellular_component^myofibril`GO:0016459^cellular_component^myosin complex`GO:0032982^cellular_component^myosin filament`GO:0051015^molecular_function^actin filament binding`GO:0005524^molecular_function^ATP binding`GO:0005516^molecular_function^calmodulin binding`GO:0003774^molecular_function^motor activity	GO:0030016^cellular_component^myofibril`GO:0016459^cellular_component^myosin complex`GO:0032982^cellular_component^myosin filament`GO:0051015^molecular_function^actin filament binding`GO:0005524^molecular_function^ATP binding`GO:0005516^molecular_function^calmodulin binding`GO:0003774^molecular_function^motor activity	GO:0016459;GO:0032982;GO:0051015;GO:0005524;GO:0005516;GO:0005516;GO:0003774;	N	+	FALSE	8.85685	0.720906	6.48816	13.2338	2.72915	4.27394	1.59629	3.91349	10.7621	10.1957	2.36869	4.84037	1.5448	6.53965	6.38517	4.99485	3.50154	4.47992	0.566426	2.00824	100	19.7219	5.30381	OTHER	0.000336	0.999664
>TRINITY_DN2417_c0_g1_i1.p1 TRINITY_DN2417_c0_g1~~TRINITY_DN2417_c0_g1_i1.p1 ORF type:complete len:292 (-),score=60.28 TRINITY_DN2417_c0_g1_i1:676-1551(-)	11.67	590.2	6	6	1	13.06	291	TRINITY_DN2417_c0_g1_i1.p1	TRINITY_DN2417_c0_g1_i1	no blast hit	no blast hit	CO1A1_CHICK^CO1A1_CHICK^Q:65-156,H:444-547^53.846%ID^E:2.21e-11^RecName: Full=Collagen alpha-1(I) chain;^Eukaryota; Metazoa; Chordata; Craniata; Vertebrata; Euteleostomi; Archelosauria; Archosauria; Dinosauria; Saurischia; Theropoda; Coelurosauria; Aves; Neognathae; Galloanserae; Galliformes; Phasianidae; Phasianinae; Gallus	tr|A0A3M6U1L6|A0A3M6U1L6_9CNID^tr|A0A3M6U1L6|A0A3M6U1L6_9CNID^Q:363-1,H:319-433^68.595%ID^E:8.15e-26^.^.	.	.	.	.	GO:0005584^cellular_component^collagen type I trimer`GO:0005737^cellular_component^cytoplasm`GO:0031012^cellular_component^extracellular matrix`GO:0005615^cellular_component^extracellular space`GO:0005201^molecular_function^extracellular matrix structural constituent`GO:0046872^molecular_function^metal ion binding`GO:0001568^biological_process^blood vessel development`GO:0038063^biological_proces…	GO:0005737;GO:0031012;GO:0005615;GO:0005201;GO:0046872;GO:0046872;GO:0001568;GO:0038063;GO:0030198;GO:0001503;GO:0009612;GO:0001501;GO:0043588;	N	+	FALSE	6.18557	2.74914	4.811	5.49828	3.09278	14.0893	1.03093	3.78007	6.52921	6.87285	2.4055	4.46735	14.0893	4.12371	4.12371	5.15464	3.78007	4.46735	1.37457	1.37457	100	10.3093	5.84192	OTHER	0.001202	0.998798
>TRINITY_DN2428_c0_g2_i1.p1 TRINITY_DN2428_c0_g2~~TRINITY_DN2428_c0_g2_i1.p1 ORF type:5prime_partial len:427 (-),score=53.39 TRINITY_DN2428_c0_g2_i1:51-1331(-)	11.07	571.5	7	6	1	14.08	426	TRINITY_DN2428_c0_g2_i1.p1	TRINITY_DN2428_c0_g2_i1	TRFM_RABIT^TRFM_RABIT^Q:1175-201,H:19-348^37.249%ID^E:2.11e-59^RecName: Full	Melanotransferrin {ECO:0000250|UniProtKB:P08582}	TRFM_RABIT^TRFM_RABIT^Q:11-387,H:10-385^36.07%ID^E:1.28e-60^RecName: Full=Melanotransferrin {ECO:0000250|UniProtKB:P08582};^Eukaryota; Metazoa; Chordata; Craniata; Vertebrata; Euteleostomi; Mammalia; Eutheria; Euarchontoglires; Glires; Lagomorpha; Leporidae; Oryctolagus	.	.	ENOG410XQ36^antigen p97 (melanoma associated) identified by monoclonal antibodies 133.2 and 96.5	KEGG:ocu:100008603`KO:K06569	GO:0031225^cellular_component^anchored component of membrane`GO:0005615^cellular_component^extracellular space`GO:0005886^cellular_component^plasma membrane`GO:0046872^molecular_function^metal ion binding`GO:0006811^biological_process^ion transport`GO:0055072^biological_process^iron ion homeostasis	GO:0031225^cellular_component^anchored component of membrane`GO:0005615^cellular_component^extracellular space`GO:0005886^cellular_component^plasma membrane`GO:0046872^molecular_function^metal ion binding`GO:0006811^biological_process^ion transport`GO:0055072^biological_process^iron ion homeostasis	GO:0005615;GO:0005886;GO:0046872;GO:0006811;GO:0055072;GO:0055072	N	FALSE	FALSE	8.92019	3.52113	5.16432	3.28638	2.11268	8.21596	1.64319	2.8169	9.15493	9.85915	2.34742	6.10329	4.69484	2.58216	2.58216	6.57277	6.80751	8.68545	0.704225	4.22535	100	8.4507	7.04225
>TRINITY_DN246_c0_g2_i1.p1 TRINITY_DN246_c0_g2~~TRINITY_DN246_c0_g2_i1.p1 ORF type:5prime_partial len:168 (-),score=56.79 TRINITY_DN246_c0_g2_i1:553-1056(-)	5.99	496	4	4	1	23.35	167	TRINITY_DN246_c0_g2_i1.p1	TRINITY_DN246_c0_g2_i1	H10_RAT^H10_RAT^Q:948-739,H:28-97^64.286%ID^E:3.48e-20^RecName: Full	Histone H1.0	H5_CHICK^H5_CHICK^Q:10-150,H:5-141^47.917%ID^E:8.76e-29^RecName: Full=Histone H5;^Eukaryota; Metazoa; Chordata; Craniata; Vertebrata; Euteleostomi; Archelosauria; Archosauria; Dinosauria; Saurischia; Theropoda; Coelurosauria; Aves; Neognathae; Galloanserae; Galliformes; Phasianidae; Phasianinae; Gallus	.	.	ENOG4112541^Histone cluster 1	KEGG:gga:693250`KO:K11275	GO:0000790^cellular_component^nuclear chromatin`GO:0005719^cellular_component^nuclear euchromatin`GO:0000786^cellular_component^nucleosome`GO:0005634^cellular_component^nucleus`GO:0017053^cellular_component^transcriptional repressor complex`GO:0003680^molecular_function^AT DNA binding`GO:0031490^molecular_function^chromatin DNA binding`GO:0003690^molecular_function^double-stranded DNA binding`GO:…	GO:0000786^cellular_component^nucleosome`GO:0005634^cellular_component^nucleus`GO:0003690^molecular_function^double-stranded DNA binding`GO:0031492^molecular_function^nucleosomal DNA binding`GO:0006325^biological_process^chromatin organization`GO:0030261^biological_process^chromosome condensation`GO:0031936^biological_process^negative regulation of chromatin silencing`GO:0045910^biological_proces…	GO:0005634;GO:0003690;GO:0031492;GO:0006325;GO:0030261;GO:0030261;GO:0031936;GO:0045910;GO:0006334;GO:0016584;GO:0006355;	N	FALSE	FALSE	19.1617	0	1.1976	4.19162	1.79641	5.38922	1.1976	4.19162	25.1497	5.98802	1.1976	0.598802	10.1796	3.59281	2.39521	4.79042	2.99401	4.19162	0	1.79641	100	5.38922	3.59281
>TRINITY_DN25600_c0_g2_i2.p2 TRINITY_DN25600_c0_g2~~TRINITY_DN25600_c0_g2_i2.p2 ORF type:3prime_partial len:150 (+),score=14.53 TRINITY_DN25600_c0_g2_i2:684-1130(+)	45.18	712.5	39	12	4	63.76	149	TRINITY_DN25600_c0_g2_i2.p2	TRINITY_DN25600_c0_g2_i2	PLCL_MYTGA^PLCL_MYTGA^Q:681-1118,H:3-156^30.323%ID^E:1.68e-17^RecName: Full	Perlucin-like protein {ECO:0000303|PubMed:21643827}	C209D_MOUSE^C209D_MOUSE^Q:28-148,H:106-229^35.2%ID^E:1.32e-19^RecName: Full=CD209 antigen-like protein D;^Eukaryota; Metazoa; Chordata; Craniata; Vertebrata; Euteleostomi; Mammalia; Eutheria; Euarchontoglires; Glires; Rodentia; Myomorpha; Muroidea; Muridae; Murinae; Mus; Mus	.	.	ENOG41123NI^endocytosis	KEGG:mmu:170779`KO:K06563	GO:0005576^cellular_component^extracellular region`GO:0030246^molecular_function^carbohydrate binding	GO:0016021^cellular_component^integral component of membrane`GO:0005537^molecular_function^mannose binding`GO:0046872^molecular_function^metal ion binding`GO:0042803^molecular_function^protein homodimerization activity`GO:0042742^biological_process^defense response to bacterium`GO:0006897^biological_process^endocytosis`GO:0050715^biological_process^positive regulation of cytokine secretion	GO:0005537;GO:0046872;GO:0042803;GO:0042742;GO:0006897;GO:0006897;GO:0050715;	N	FALSE	+	4.69799	3.3557	9.39597	6.71141	4.02685	7.38255	1.34228	7.38255	6.71141	5.36913	2.01342	8.05369	4.02685	4.69799	2.68456	6.71141	3.3557	2.68456	4.69799	4.69799	100	16.1074	13.4228
>TRINITY_DN261_c0_g1_i4.p1 TRINITY_DN261_c0_g1~~TRINITY_DN261_c0_g1_i4.p1 ORF type:5prime_partial len:631 (-),score=105.80 TRINITY_DN261_c0_g1_i4:239-2131(-)	15.58	787.1	9	4	1	6.67	630	TRINITY_DN261_c0_g1_i4.p1	TRINITY_DN261_c0_g1_i4	VWDE_HUMAN^VWDE_HUMAN^Q:1591-251,H:768-1216^27.174%ID^E:3.26e-46^RecName: Full	von Willebrand factor D and EGF domain-containing protein	VWDE_HUMAN^VWDE_HUMAN^Q:181-627,H:768-1216^27.174%ID^E:1.07e-46^RecName: Full=von Willebrand factor D and EGF domain-containing protein;^Eukaryota; Metazoa; Chordata; Craniata; Vertebrata; Euteleostomi; Mammalia; Eutheria; Euarchontoglires; Primates; Haplorrhini; Catarrhini; Hominidae; Homo	.	.	ENOG410Z37Q^von Willebrand factor D and EGF	KEGG:hsa:221806	GO:0009986^cellular_component^cell surface`GO:0005576^cellular_component^extracellular region`GO:0005102^molecular_function^signaling receptor binding`GO:0048856^biological_process^anatomical structure development	GO:0009986^cellular_component^cell surface`GO:0005576^cellular_component^extracellular region`GO:0005102^molecular_function^signaling receptor binding`GO:0048856^biological_process^anatomical structure development	GO:0005576;GO:0005102;GO:0048856;	N	FALSE	FALSE	5.2381	5.55556	7.77778	7.14286	3.49206	9.52381	1.5873	2.53968	6.66667	5.2381	1.5873	4.28571	5.55556	4.12698	5.2381	7.30159	4.92063	8.4127	1.42857	2.38095	100	14.9206	7.30159
>TRINITY_DN26283_c0_g1_i2.p1 TRINITY_DN26283_c0_g1~~TRINITY_DN26283_c0_g1_i2.p1 ORF type:5prime_partial len:1035 (-),score=359.54 TRINITY_DN26283_c0_g1_i2:407-3511(-)	2.31	383.8	12	1	0	0.87	1034	TRINITY_DN26283_c0_g1_i2.p1	TRINITY_DN26283_c0_g1_i2	no blast hit	no blast hit	.	.	.	.	.	.	.		N	FALSE	FALSE	6.76983	1.06383	5.89942	14.1199	0.773694	2.41779	1.6441	2.90135	12.1857	13.1528	2.03095	5.60928	0.290135	6.38298	6.18956	7.93037	5.22244	3.86847	0.483559	1.06383	100	20.0193	2.32108
>TRINITY_DN26452_c2_g1_i1.p1 TRINITY_DN26452_c2_g1~~TRINITY_DN26452_c2_g1_i1.p1 ORF type:5prime_partial len:293 (+),score=63.43 TRINITY_DN26452_c2_g1_i1:1-879(+)	2.86	460	3	3	1	6.16	292	TRINITY_DN26452_c2_g1_i1.p1	TRINITY_DN26452_c2_g1_i1	BMH2_YEAST^BMH2_YEAST^Q:76-846,H:1-244^56.757%ID^E:1.59e-85^RecName: Full	Protein BMH2	BMH2_YEAST^BMH2_YEAST^Q:26-282,H:1-244^56.757%ID^E:9.53e-90^RecName: Full=Protein BMH2;^Eukaryota; Fungi; Dikarya; Ascomycota; Saccharomycotina; Saccharomycetes; Saccharomycetales; Saccharomycetaceae; Saccharomyces	.	.	.	KEGG:sce:YDR099W`KO:K06630	GO:0005737^cellular_component^cytoplasm`GO:0005634^cellular_component^nucleus`GO:0005886^cellular_component^plasma membrane`GO:0003688^molecular_function^DNA replication origin binding`GO:0050815^molecular_function^phosphoserine residue binding`GO:0019904^molecular_function^protein domain specific binding`GO:0030437^biological_process^ascospore formation`GO:0000077^biological_process^DNA damage c…	GO:0005737^cellular_component^cytoplasm`GO:0005634^cellular_component^nucleus`GO:0005886^cellular_component^plasma membrane`GO:0003688^molecular_function^DNA replication origin binding`GO:0050815^molecular_function^phosphoserine residue binding`GO:0019904^molecular_function^protein domain specific binding`GO:0030437^biological_process^ascospore formation`GO:0000077^biological_process^DNA damage c…	GO:0005634;GO:0005886;GO:0003688;GO:0050815;GO:0019904;GO:0019904;GO:0030437;GO:0000077;GO:0006270;GO:0034221;GO:0043066;GO:1904667;GO:0006267;GO:0007124;GO:0007265;GO:0070873;GO:0001402;	N	FALSE	FALSE	8.21918	2.05479	8.56164	12.6712	2.05479	2.05479	0.684932	4.45205	8.56164	9.24658	3.42466	3.08219	2.05479	3.76712	5.82192	6.50685	5.13699	6.16438	0.684932	4.79452	100	21.2329	7.53425
>TRINITY_DN2668_c0_g2_i1.p1 TRINITY_DN2668_c0_g2~~TRINITY_DN2668_c0_g2_i1.p1 ORF type:complete len:542 (-),score=38.02 TRINITY_DN2668_c0_g2_i1:217-1842(-)	11.15	666.4	5	5	0	9.06	541	TRINITY_DN2668_c0_g2_i1.p1	TRINITY_DN2668_c0_g2_i1	MMP24_MOUSE^MMP24_MOUSE^Q:1695-223,H:57-543^36.056%ID^E:2.05e-81^RecName: Full	Matrix metalloproteinase-24	MMP24_RAT^MMP24_RAT^Q:50-540,H:57-543^36.561%ID^E:5.03e-88^RecName: Full=Matrix metalloproteinase-24;^Eukaryota; Metazoa; Chordata; Craniata; Vertebrata; Euteleostomi; Mammalia; Eutheria; Euarchontoglires; Glires; Rodentia; Myomorpha; Muroidea; Muridae; Murinae; Rattus	.	ExpAA=22.67^PredHel=1^Topology=i7-29o	ENOG410XQ5D^matrix metallopeptidase	KEGG:rno:83513`KO:K08002	GO:0031012^cellular_component^extracellular matrix`GO:0005615^cellular_component^extracellular space`GO:0005887^cellular_component^integral component of plasma membrane`GO:0032588^cellular_component^trans-Golgi network membrane`GO:0045296^molecular_function^cadherin binding`GO:0004222^molecular_function^metalloendopeptidase activity`GO:0008270^molecular_function^zinc ion binding`GO:0044331^biolog…	GO:0031012^cellular_component^extracellular matrix`GO:0005615^cellular_component^extracellular space`GO:0016021^cellular_component^integral component of membrane`GO:0005887^cellular_component^integral component of plasma membrane`GO:0032588^cellular_component^trans-Golgi network membrane`GO:0045296^molecular_function^cadherin binding`GO:0004222^molecular_function^metalloendopeptidase activity`GO:…	GO:0005615;GO:0016021;GO:0005887;GO:0032588;GO:0045296;GO:0045296;GO:0004222;GO:0008233;GO:0008270;GO:0044331;GO:0098742;GO:0030574;GO:0050965;GO:0030198;GO:0010001;GO:0097150;GO:0006508;	N	+	FALSE	7.20887	0.924214	7.94824	4.62107	5.54529	8.31793	1.2939	4.62107	5.54529	6.28466	1.10906	3.51201	7.94824	1.84843	5.1756	7.02403	7.39372	5.36044	2.5878	5.73013	100	12.5693	13.8632	SP(Sec/SPI)	0.995929	0.004071	CS pos: 24-25. VEA-AP. Pr: 0.9685
>TRINITY_DN27235_c0_g1_i1.p1 TRINITY_DN27235_c0_g1~~TRINITY_DN27235_c0_g1_i1.p1 ORF type:5prime_partial len:1189 (+),score=169.24 TRINITY_DN27235_c0_g1_i1:2-3568(+)	0.95	333.7	2	2	0	2.27	1188	TRINITY_DN27235_c0_g1_i1.p1	TRINITY_DN27235_c0_g1_i1	SORL_RABIT^SORL_RABIT^Q:2-589,H:558-753^38.384%ID^E:4.95e-32^RecName: Full	Sortilin-related receptor	SORL_RABIT^SORL_RABIT^Q:1-196,H:558-753^38.384%ID^E:4.69e-32^RecName: Full=Sortilin-related receptor;^Eukaryota; Metazoa; Chordata; Craniata; Vertebrata; Euteleostomi; Mammalia; Eutheria; Euarchontoglires; Glires; Lagomorpha; Leporidae; Oryctolagus	.	ExpAA=22.84^PredHel=1^Topology=o1101-1123i	ENOG410Y3W5^Functions as a sorting receptor in the Golgi compartment required for the intracellular sorting and delivery of soluble vacuolar proteins, like carboxypeptidase Y (CPY) and proteinase A. Executes multiple rounds of sorting by cycling between the late Golgi and a prevacuolar endosome-like compartment	KEGG:ocu:100009378	GO:0005769^cellular_component^early endosome`GO:0031901^cellular_component^early endosome membrane`GO:0005783^cellular_component^endoplasmic reticulum`GO:0005789^cellular_component^endoplasmic reticulum membrane`GO:0005768^cellular_component^endosome`GO:0005615^cellular_component^extracellular space`GO:0005794^cellular_component^Golgi apparatus`GO:0000139^cellular_component^Golgi membrane`GO:0016…	GO:0005769^cellular_component^early endosome`GO:0031901^cellular_component^early endosome membrane`GO:0005783^cellular_component^endoplasmic reticulum`GO:0005789^cellular_component^endoplasmic reticulum membrane`GO:0005768^cellular_component^endosome`GO:0005615^cellular_component^extracellular space`GO:0005794^cellular_component^Golgi apparatus`GO:0000139^cellular_component^Golgi membrane`GO:0016…	GO:0031901;GO:0005783;GO:0005789;GO:0005768;GO:0005615;GO:0005615;GO:0005794;GO:0000139;GO:0016021;GO:0016020;GO:0005771;GO:0032585;GO:0005886;GO:0055038;GO:0030658;GO:1990845;GO:0002024;GO:0006897;GO:0038020;GO:0030514;GO:0010897;GO:1904179;GO:0046628;GO:0006605;GO:0014910;	N	FALSE	FALSE	5.97643	1.26263	5.38721	5.55556	4.0404	7.15488	1.17845	5.13468	7.74411	5.21886	1.76768	5.13468	5.13468	3.367	4.3771	9.09091	8.41751	8.33333	1.6835	4.0404	100	10.9428	9.76431
>TRINITY_DN27972_c0_g1_i14.p1 TRINITY_DN27972_c0_g1~~TRINITY_DN27972_c0_g1_i14.p1 ORF type:complete len:219 (-),score=14.72 TRINITY_DN27972_c0_g1_i14:244-816(-)	16.95	717.7	10	6	2	30	190	TRINITY_DN27972_c0_g1_i14.p1	TRINITY_DN27972_c0_g1_i14	no blast hit	no blast hit	.	.	.	.	.	.	.		N	+	FALSE	4.21053	7.36842	7.89474	2.63158	3.15789	8.94737	3.15789	3.15789	5.78947	8.94737	1.57895	5.78947	3.68421	3.15789	6.31579	7.89474	2.63158	3.68421	5.26316	4.73684	100	10.5263	13.1579	SP(Sec/SPI)	0.998541	0.001459	CS pos: 19-20. ARG-GC. Pr: 0.7126
>TRINITY_DN2876_c0_g1_i7.p1 TRINITY_DN2876_c0_g1~~TRINITY_DN2876_c0_g1_i7.p1 ORF type:complete len:1137 (-),score=336.83 TRINITY_DN2876_c0_g1_i7:944-4354(-)	15.99	666.1	7	4	0	4.31	1136	TRINITY_DN2876_c0_g1_i7.p1	TRINITY_DN2876_c0_g1_i7	L2GL2_HUMAN^L2GL2_HUMAN^Q:4354-1613,H:1-939^43.022%ID^E:0^RecName: Full	LLGL scribble cell polarity complex component 2	L2GL1_MOUSE^L2GL1_MOUSE^Q:1-961,H:1-1002^41.552%ID^E:0^RecName: Full=Lethal(2) giant larvae protein homolog 1;^Eukaryota; Metazoa; Chordata; Craniata; Vertebrata; Euteleostomi; Mammalia; Eutheria; Euarchontoglires; Glires; Rodentia; Myomorpha; Muroidea; Muridae; Murinae; Mus; Mus	.	.	ENOG410XS6Z^Lethal giant larvae homolog	KEGG:mmu:16897`KO:K06094	GO:0005623^cellular_component^cell`GO:0030864^cellular_component^cortical actin cytoskeleton`GO:0005737^cellular_component^cytoplasm`GO:0005829^cellular_component^cytosol`GO:0043231^cellular_component^intracellular membrane-bounded organelle`GO:0005886^cellular_component^plasma membrane`GO:0005096^molecular_function^GTPase activator activity`GO:0045159^molecular_function^myosin II binding`GO:0030…	GO:0030424^cellular_component^axon`GO:0016323^cellular_component^basolateral plasma membrane`GO:0005623^cellular_component^cell`GO:0030864^cellular_component^cortical actin cytoskeleton`GO:0005737^cellular_component^cytoplasm`GO:0005856^cellular_component^cytoskeleton`GO:0031901^cellular_component^early endosome membrane`GO:0000137^cellular_component^Golgi cis cisterna`GO:0035748^cellular_compone…	GO:0016323;GO:0005623;GO:0030864;GO:0005737;GO:0005856;GO:0005856;GO:0031901;GO:0000137;GO:0035748;GO:0005886;GO:0032588;GO:0005096;GO:0045159;GO:0019901;GO:0017137;GO:0007409;GO:0007420;GO:0030866;GO:0051294;GO:0006887;GO:0006893;GO:0035090;GO:0065003;GO:0032878;GO:0008593;	N	+	FALSE	5.54577	1.76056	5.80986	10.4754	3.69718	7.74648	2.99296	4.48944	7.92254	7.83451	1.49648	2.8169	3.96127	2.99296	3.60915	10.6514	5.98592	7.21831	1.05634	1.93662	100	16.2852	6.69014	OTHER	0.001877	0.998123
>TRINITY_DN28792_c0_g1_i1.p1 TRINITY_DN28792_c0_g1~~TRINITY_DN28792_c0_g1_i1.p1 ORF type:internal len:172 (-),score=46.49 TRINITY_DN28792_c0_g1_i1:2-514(-)	19.78	580.1	5	5	2	24.56	171	TRINITY_DN28792_c0_g1_i1.p1	TRINITY_DN28792_c0_g1_i1	no blast hit	no blast hit	.	.	.	.	.	.	.		N	FALSE	FALSE	12.8655	0	5.84795	10.5263	1.16959	2.33918	0.584795	5.26316	8.77193	7.60234	2.92398	7.60234	2.33918	5.26316	7.01754	7.01754	9.35673	2.92398	0.584795	0	100	16.3743	1.75439
>TRINITY_DN2887_c0_g1_i7.p1 TRINITY_DN2887_c0_g1~~TRINITY_DN2887_c0_g1_i7.p1 ORF type:complete len:1611 (-),score=378.17 TRINITY_DN2887_c0_g1_i7:160-4992(-)	51.41	761	25	13	9	7.76	1610	TRINITY_DN2887_c0_g1_i7.p1	TRINITY_DN2887_c0_g1_i7	CO5A1_HUMAN^CO5A1_HUMAN^Q:1218-166,H:1474-1836^44.236%ID^E:1.58e-55^RecName: Full	Collagen alpha-1(V) chain	CO1A2_MOUSE^CO1A2_MOUSE^Q:321-1610,H:86-1372^42.274%ID^E:3.99e-147^RecName: Full=Collagen alpha-2(I) chain;^Eukaryota; Metazoa; Chordata; Craniata; Vertebrata; Euteleostomi; Mammalia; Eutheria; Euarchontoglires; Glires; Rodentia; Myomorpha; Muroidea; Muridae; Murinae; Mus; Mus	.	.	ENOG410XNMM^collagen, type	KEGG:mmu:12843`KO:K06236	GO:0005604^cellular_component^basement membrane`GO:0005588^cellular_component^collagen type V trimer`GO:0062023^cellular_component^collagen-containing extracellular matrix`GO:0005788^cellular_component^endoplasmic reticulum lumen`GO:0031012^cellular_component^extracellular matrix`GO:0005576^cellular_component^extracellular region`GO:0005615^cellular_component^extracellular space`GO:0005201^molecu…	GO:0005581^cellular_component^collagen trimer`GO:0005584^cellular_component^collagen type I trimer`GO:0062023^cellular_component^collagen-containing extracellular matrix`GO:0005783^cellular_component^endoplasmic reticulum`GO:0031012^cellular_component^extracellular matrix`GO:0005615^cellular_component^extracellular space`GO:0005201^molecular_function^extracellular matrix structural constituent`GO…	GO:0005584;GO:0062023;GO:0005783;GO:0031012;GO:0005615;GO:0005615;GO:0005201;GO:0042802;GO:0046872;GO:0048407;GO:0002020;GO:0030674;GO:0046332;GO:0001568;GO:0030282;GO:0071230;GO:0030199;GO:0032963;GO:0085029;GO:0030198;GO:0070208;GO:0008217;GO:0007266;GO:0001501;GO:0043589;GO:0007179	N	+	FALSE	6.39752	0.807453	5.65217	4.90683	2.54658	25.4037	0.310559	2.1118	4.34783	3.85093	1.30435	2.6087	15.0311	5.46584	6.3354	5.15528	3.10559	3.04348	0.496894	1.11801	100	10.559	4.16149	SP(Sec/SPI)	0.989131	0.010869	CS pos: 21-22. VAA-TD. Pr: 0.7189
>TRINITY_DN2984_c0_g1_i4.p1 TRINITY_DN2984_c0_g1~~TRINITY_DN2984_c0_g1_i4.p1 ORF type:complete len:2959 (-),score=872.94 TRINITY_DN2984_c0_g1_i4:426-9302(-)	63.81	805.2	28	22	1	8.92	2958	TRINITY_DN2984_c0_g1_i4.p1	TRINITY_DN2984_c0_g1_i4	FLNA_HUMAN^FLNA_HUMAN^Q:9293-1590,H:25-2646^36.928%ID^E:0^RecName: Full	Filamin-A	FLNA_HUMAN^FLNA_HUMAN^Q:4-2571,H:25-2646^37.032%ID^E:0^RecName: Full=Filamin-A;^Eukaryota; Metazoa; Chordata; Craniata; Vertebrata; Euteleostomi; Mammalia; Eutheria; Euarchontoglires; Primates; Haplorrhini; Catarrhini; Hominidae; Homo	tr|A0A2B4S6C3|A0A2B4S6C3_STYPI^tr|A0A2B4S6C3|A0A2B4S6C3_STYPI^Q:45-236,H:489-552^51.562%ID^E:5.26e-17^.^.	.	COG5069^Microtubule associated monoxygenase, calponin and LIM domain containing	KEGG:hsa:2316`KO:K04437	GO:0015629^cellular_component^actin cytoskeleton`GO:0005884^cellular_component^actin filament`GO:0097440^cellular_component^apical dendrite`GO:0005911^cellular_component^cell-cell junction`GO:0030863^cellular_component^cortical cytoskeleton`GO:0005737^cellular_component^cytoplasm`GO:0005829^cellular_component^cytosol`GO:0043198^cellular_component^dendritic shaft`GO:0070062^cellular_component^extr…	GO:0015629^cellular_component^actin cytoskeleton`GO:0005884^cellular_component^actin filament`GO:0097440^cellular_component^apical dendrite`GO:0005911^cellular_component^cell-cell junction`GO:0030863^cellular_component^cortical cytoskeleton`GO:0005737^cellular_component^cytoplasm`GO:0005829^cellular_component^cytosol`GO:0043198^cellular_component^dendritic shaft`GO:0070062^cellular_component^extr…	GO:0005884;GO:0097440;GO:0005911;GO:0030863;GO:0005737;GO:0005737;GO:0005829;GO:0043198;GO:0070062;GO:0005576;GO:0005925;GO:0098978;GO:0030426;GO:0016020;GO:0031523;GO:0005730;GO:0005634;GO:0043204;GO:0048471;GO:0005886;GO:0098794;GO:0030018;GO:0051015;GO:0045296;GO:0034988;GO:0001664;GO:0051020;GO:0044325;GO:0019900;GO:0031852;GO:0015459;GO:0042803;GO:0048365;GO:0017160;GO:0017048;GO:0003723;GO:…	N	+	FALSE	6.6261	1.69033	7.60649	7.23462	3.27924	9.97295	2.09601	4.12441	6.38945	5.57809	1.08181	3.38066	9.12779	2.43408	3.31305	6.45707	5.54429	10.4124	0.540906	3.11021	100	14.8411	6.93036	OTHER	0.001319	0.998681
>TRINITY_DN3033_c0_g1_i4.p1 TRINITY_DN3033_c0_g1~~TRINITY_DN3033_c0_g1_i4.p1 ORF type:complete len:133 (-),score=23.80 TRINITY_DN3033_c0_g1_i4:105-503(-)	11.52	660.9	4	3	1	21.97	132	TRINITY_DN3033_c0_g1_i4.p1	TRINITY_DN3033_c0_g1_i4	no blast hit	no blast hit	.	tr|A0A3M6T6M3|A0A3M6T6M3_9CNID^tr|A0A3M6T6M3|A0A3M6T6M3_9CNID^Q:820-98,H:20-255^70.37%ID^E:2.98e-92^.^.	ExpAA=22.02^PredHel=1^Topology=i108-130o	.	.	.	.		N	+	FALSE	13.6364	11.3636	5.30303	6.81818	4.54545	6.81818	0	4.54545	9.84848	9.09091	1.51515	1.51515	0	3.0303	0.757576	7.57576	5.30303	6.06061	0.757576	1.51515	100	12.1212	6.81818	SP(Sec/SPI)	0.999818	0.000182	CS pos: 19-20. GEA-LK. Pr: 0.9788
>TRINITY_DN3033_c1_g1_i1.p1 TRINITY_DN3033_c1_g1~~TRINITY_DN3033_c1_g1_i1.p1 ORF type:5prime_partial len:154 (-),score=19.34 TRINITY_DN3033_c1_g1_i1:69-530(-)	10.04	454.9	3	3	2	15.69	153	TRINITY_DN3033_c1_g1_i1.p1	TRINITY_DN3033_c1_g1_i1	no blast hit	no blast hit	.	.	ExpAA=42.73^PredHel=2^Topology=i13-35o133-152i	.	.	.	.		N	FALSE	FALSE	7.18954	9.80392	7.18954	6.53595	5.22876	5.88235	0	5.88235	6.53595	7.84314	3.92157	2.61438	2.61438	2.61438	3.92157	8.49673	5.88235	5.22876	0.653595	1.96078	100	13.7255	7.84314
>TRINITY_DN30976_c0_g1_i5.p1 TRINITY_DN30976_c0_g1~~TRINITY_DN30976_c0_g1_i5.p1 ORF type:complete len:374 (+),score=57.13 TRINITY_DN30976_c0_g1_i5:174-1295(+)	7.16	532.3	7	5	2	7.77	373	TRINITY_DN30976_c0_g1_i5.p1	TRINITY_DN30976_c0_g1_i5	no blast hit	no blast hit	.	.	.	.	.	.	.		N	+	FALSE	6.70241	3.48525	6.97051	4.82574	2.41287	8.84718	2.68097	3.75335	7.23861	5.36193	1.34048	6.97051	7.5067	3.75335	2.14477	5.36193	9.11528	4.82574	2.68097	4.02145	100	11.7962	9.11528	SP(Sec/SPI)	0.996623	0.003377	CS pos: 19-20. SIA-KE. Pr: 0.6785
>TRINITY_DN3214_c0_g2_i5.p3 TRINITY_DN3214_c0_g2~~TRINITY_DN3214_c0_g2_i5.p3 ORF type:complete len:169 (-),score=29.33 TRINITY_DN3214_c0_g2_i5:145-651(-)	8.03	445.7	6	5	3	14.88	168	TRINITY_DN3214_c0_g2_i5.p3	TRINITY_DN3214_c0_g2_i5	ECT_ACRMI^ECT_ACRMI^Q:501-226,H:106-196^53.261%ID^E:3.37e-17^RecName: Full	Ectin {ECO:0000303|PubMed:23765379}	HMCN1_MOUSE^HMCN1_MOUSE^Q:50-164,H:4584-4697^47.826%ID^E:6.46e-31^RecName: Full=Hemicentin-1 {ECO:0000312|MGI:MGI:2685047};^Eukaryota; Metazoa; Chordata; Craniata; Vertebrata; Euteleostomi; Mammalia; Eutheria; Euarchontoglires; Glires; Rodentia; Myomorpha; Muroidea; Muridae; Murinae; Mus; Mus	.	.	ENOG410ZN3C^von Willebrand factor A domain containing 7	KEGG:mmu:545370`KO:K17341	GO:0005576^cellular_component^extracellular region	GO:0005604^cellular_component^basement membrane`GO:0005938^cellular_component^cell cortex`GO:0030054^cellular_component^cell junction`GO:0032154^cellular_component^cleavage furrow`GO:0062023^cellular_component^collagen-containing extracellular matrix`GO:0005576^cellular_component^extracellular region`GO:0005509^molecular_function^calcium ion binding`GO:0050839^molecular_function^cell adhesion mol…	GO:0005938;GO:0030054;GO:0032154;GO:0062023;GO:0005576;GO:0005576;GO:0005509;GO:0050839;GO:0042803;GO:0038023;GO:0007049;GO:0051301;GO:0007157;GO:0007156;GO:0009617;	N	+	FALSE	6.54762	8.92857	4.7619	4.7619	0.595238	14.2857	0.595238	3.57143	14.2857	1.19048	0.595238	4.7619	4.7619	1.78571	6.54762	7.7381	5.95238	2.97619	2.38095	2.97619	100	9.52381	5.95238	OTHER	0.006549	0.993451
>TRINITY_DN328_c1_g2_i2.p1 TRINITY_DN328_c1_g2~~TRINITY_DN328_c1_g2_i2.p1 ORF type:complete len:310 (+),score=48.34 TRINITY_DN328_c1_g2_i2:317-1246(+)	12.07	552.8	15	5	1	19.42	309	TRINITY_DN328_c1_g2_i2.p1	TRINITY_DN328_c1_g2_i2	MRC1_HUMAN^MRC1_HUMAN^Q:413-1225,H:646-929^28.136%ID^E:4.73e-27^RecName: Full	Macrophage mannose receptor 1	MRC1_HUMAN^MRC1_HUMAN^Q:33-303,H:646-929^28.136%ID^E:1.95e-28^RecName: Full=Macrophage mannose receptor 1;^Eukaryota; Metazoa; Chordata; Craniata; Vertebrata; Euteleostomi; Mammalia; Eutheria; Euarchontoglires; Primates; Haplorrhini; Catarrhini; Hominidae; Homo	.	.	ENOG410XRS3^mannose receptor, C type 1	KEGG:hsa:4360`KO:K06560	GO:0009986^cellular_component^cell surface`GO:0010008^cellular_component^endosome membrane`GO:0005887^cellular_component^integral component of plasma membrane`GO:0005886^cellular_component^plasma membrane`GO:0038024^molecular_function^cargo receptor activity`GO:0005537^molecular_function^mannose binding`GO:0004888^molecular_function^transmembrane signaling receptor activity`GO:0001618^molecular_f…	GO:0009986^cellular_component^cell surface`GO:0010008^cellular_component^endosome membrane`GO:0005887^cellular_component^integral component of plasma membrane`GO:0005886^cellular_component^plasma membrane`GO:0038024^molecular_function^cargo receptor activity`GO:0005537^molecular_function^mannose binding`GO:0004888^molecular_function^transmembrane signaling receptor activity`GO:0001618^molecular_f…	GO:0010008;GO:0005887;GO:0005886;GO:0038024;GO:0005537;GO:0005537;GO:0004888;GO:0001618;GO:0071346;GO:0071353;GO:0071222;GO:0006898	N	+	FALSE	7.11974	4.85437	8.09061	8.73786	3.23625	9.38511	1.2945	3.55987	8.09061	5.82524	1.94175	5.50162	4.85437	2.91262	5.50162	4.53074	2.91262	3.23625	4.20712	4.20712	100	16.8285	11.6505	SP(Sec/SPI)	0.997786	0.002214	CS pos: 20-21. AAS-KR. Pr: 0.6620
>TRINITY_DN3520_c2_g1_i1.p1 TRINITY_DN3520_c2_g1~~TRINITY_DN3520_c2_g1_i1.p1 ORF type:5prime_partial len:252 (-),score=45.08 TRINITY_DN3520_c2_g1_i1:58-813(-)	10.69	531.3	7	3	0	7.97	251	TRINITY_DN3520_c2_g1_i1.p1	TRINITY_DN3520_c2_g1_i1	RL6_RAT^RL6_RAT^Q:765-61,H:52-298^51.21%ID^E:1.22e-69^RecName: Full	60S ribosomal protein L6	RL6_RAT^RL6_RAT^Q:17-251,H:52-298^51.613%ID^E:3.46e-74^RecName: Full=60S ribosomal protein L6;^Eukaryota; Metazoa; Chordata; Craniata; Vertebrata; Euteleostomi; Mammalia; Eutheria; Euarchontoglires; Glires; Rodentia; Myomorpha; Muroidea; Muridae; Murinae; Rattus	.	.	COG2163^(ribosomal) protein	KEGG:rno:117042`KO:K02934	GO:0031672^cellular_component^A band`GO:0036464^cellular_component^cytoplasmic ribonucleoprotein granule`GO:0022625^cellular_component^cytosolic large ribosomal subunit`GO:0005634^cellular_component^nucleus`GO:0042788^cellular_component^polysomal ribosome`GO:0014069^cellular_component^postsynaptic density`GO:0005791^cellular_component^rough endoplasmic reticulum`GO:0045202^cellular_component^syna…	GO:0031672^cellular_component^A band`GO:0036464^cellular_component^cytoplasmic ribonucleoprotein granule`GO:0022625^cellular_component^cytosolic large ribosomal subunit`GO:0005634^cellular_component^nucleus`GO:0042788^cellular_component^polysomal ribosome`GO:0014069^cellular_component^postsynaptic density`GO:0005791^cellular_component^rough endoplasmic reticulum`GO:0045202^cellular_component^syna…	GO:0036464;GO:0022625;GO:0005634;GO:0042788;GO:0014069;GO:0014069;GO:0005791;GO:0045202;GO:1990932;GO:0003729;GO:0003723;GO:0003735;GO:0000049;GO:0002181;GO:0000027;	N	FALSE	FALSE	3.58566	0.398406	5.57769	5.17928	2.78884	4.78088	2.39044	5.17928	13.9442	9.96016	1.19522	2.39044	5.9761	4.38247	9.56175	5.9761	4.78088	8.36653	0.398406	3.18725	100	10.757	6.3745
>TRINITY_DN35252_c0_g1_i1.p1 TRINITY_DN35252_c0_g1~~TRINITY_DN35252_c0_g1_i1.p1 ORF type:complete len:368 (+),score=70.55 TRINITY_DN35252_c0_g1_i1:76-1179(+)	8.88	508.8	6	5	1	20.71	367	TRINITY_DN35252_c0_g1_i1.p1	TRINITY_DN35252_c0_g1_i1	no blast hit	no blast hit	.	.	.	.	.	.	.		N	+	FALSE	9.26431	1.90736	6.26703	3.26975	5.17711	6.81199	1.90736	4.08719	5.99455	7.62943	2.45232	4.08719	5.44959	4.63215	5.17711	6.26703	9.26431	5.72207	0.544959	4.08719	100	9.53678	9.80926	OTHER	0.001645	0.998355
>TRINITY_DN3600_c0_g1_i11.p1 TRINITY_DN3600_c0_g1~~TRINITY_DN3600_c0_g1_i11.p1 ORF type:complete len:419 (-),score=90.97 TRINITY_DN3600_c0_g1_i11:222-1385(-)	13.63	589.2	11	8	3	16.54	387	TRINITY_DN3600_c0_g1_i11.p1	TRINITY_DN3600_c0_g1_i11	TRFE_XENTR^TRFE_XENTR^Q:1316-306,H:26-341^40.351%ID^E:3.39e-68^RecName: Full	Serotransferrin	TRFE_XENTR^TRFE_XENTR^Q:43-391,H:14-341^39.831%ID^E:1.85e-70^RecName: Full=Serotransferrin;^Eukaryota; Metazoa; Chordata; Craniata; Vertebrata; Euteleostomi; Amphibia; Batrachia; Anura; Pipoidea; Pipidae; Xenopodinae; Xenopus; Silurana	.	ExpAA=62.03^PredHel=3^Topology=i7-29o39-61i399-417o	.	KEGG:xtr:613079`KO:K14736	GO:0005615^cellular_component^extracellular space`GO:0046872^molecular_function^metal ion binding`GO:0006811^biological_process^ion transport`GO:0055072^biological_process^iron ion homeostasis	GO:0005615^cellular_component^extracellular space`GO:0046872^molecular_function^metal ion binding`GO:0006811^biological_process^ion transport`GO:0055072^biological_process^iron ion homeostasis	GO:0046872;GO:0006811;GO:0055072;	N	+	FALSE	10.8527	3.61757	6.97674	4.39276	4.39276	9.04393	2.06718	3.61757	10.5943	9.04393	2.84238	4.39276	2.32558	1.55039	1.80879	6.45995	4.65116	6.71835	0.775194	3.87597	100	11.3695	9.04393	SP(Sec/SPI)	0.986595	0.013405	CS pos: 21-22. ASA-AV. Pr: 0.6460
>TRINITY_DN36455_c0_g1_i3.p1 TRINITY_DN36455_c0_g1~~TRINITY_DN36455_c0_g1_i3.p1 ORF type:5prime_partial len:442 (+),score=182.06 TRINITY_DN36455_c0_g1_i3:1-1326(+)	29.17	803.7	11	8	1	17.91	441	TRINITY_DN36455_c0_g1_i3.p1	TRINITY_DN36455_c0_g1_i3	no blast hit	no blast hit	.	.	.	.	.	.	.		N	FALSE	FALSE	8.39002	0	5.44218	20.4082	1.13379	4.30839	0.680272	1.36054	11.5646	4.7619	1.36054	2.26757	3.85488	5.44218	14.2857	6.34921	3.40136	3.85488	0.907029	0.226757	100	25.8503	2.26757
>TRINITY_DN3751_c0_g1_i1.p1 TRINITY_DN3751_c0_g1~~TRINITY_DN3751_c0_g1_i1.p1 ORF type:complete len:1378 (+),score=270.42 TRINITY_DN3751_c0_g1_i1:164-4297(+)	81.83	1125.1	19	16	14	15.69	1377	TRINITY_DN3751_c0_g1_i1.p1	TRINITY_DN3751_c0_g1_i1	COBA2_MOUSE^COBA2_MOUSE^Q:3752-4291,H:1527-1734^37.5%ID^E:3.31e-26^RecName: Full	Collagen alpha-2(XI) chain	CO1A2_RAT^CO1A2_RAT^Q:181-1377,H:91-1372^39.485%ID^E:1.73e-123^RecName: Full=Collagen alpha-2(I) chain;^Eukaryota; Metazoa; Chordata; Craniata; Vertebrata; Euteleostomi; Mammalia; Eutheria; Euarchontoglires; Glires; Rodentia; Myomorpha; Muroidea; Muridae; Murinae; Rattus	.	.	ENOG410ZZWR^collagen, type	KEGG:rno:84352`KO:K06236	GO:0005581^cellular_component^collagen trimer`GO:0062023^cellular_component^collagen-containing extracellular matrix`GO:0031012^cellular_component^extracellular matrix`GO:0005615^cellular_component^extracellular space`GO:0005201^molecular_function^extracellular matrix structural constituent`GO:0046872^molecular_function^metal ion binding`GO:0051216^biological_process^cartilage development`GO:0002…	GO:0005581^cellular_component^collagen trimer`GO:0005584^cellular_component^collagen type I trimer`GO:0031012^cellular_component^extracellular matrix`GO:0005576^cellular_component^extracellular region`GO:0005615^cellular_component^extracellular space`GO:0005201^molecular_function^extracellular matrix structural constituent`GO:0042802^molecular_function^identical protein binding`GO:0046872^molecul…	GO:0005584;GO:0031012;GO:0005576;GO:0005615;GO:0005201;GO:0005201;GO:0042802;GO:0046872;GO:0048407;GO:0002020;GO:0030674;GO:0046332;GO:0001568;GO:0030282;GO:0071230;GO:0071310;GO:0071300;GO:0097067;GO:0030199;GO:0032963;GO:0085029;GO:0030198;GO:0070208;GO:0008217;GO:0071873;GO:0007266;GO:0001501;GO:0043589;GO:0007179;	N	+	FALSE	7.33479	0.580973	3.99419	4.93827	1.23457	28.7582	0.580973	1.96078	3.26797	3.12273	1.59768	2.97749	13.7255	6.68119	6.46333	5.80973	3.3406	2.83224	0.145243	0.653595	100	8.93246	2.03341	SP(Sec/SPI)	0.976964	0.023036	CS pos: 26-27. GLS-ED. Pr: 0.4248
>TRINITY_DN3769_c0_g1_i7.p1 TRINITY_DN3769_c0_g1~~TRINITY_DN3769_c0_g1_i7.p1 ORF type:complete len:2809 (-),score=935.77 TRINITY_DN3769_c0_g1_i7:614-9040(-)	366.7	876.8	233	129	21	35.47	2808	TRINITY_DN3769_c0_g1_i7.p1	TRINITY_DN3769_c0_g1_i7	no blast hit	no blast hit	.	.	.	.	.	.	.		N	+	FALSE	8.33333	0.391738	8.72507	12.6781	0.676638	2.74217	1.10399	3.20513	11.2179	12.6425	1.92308	6.16097	0.641026	6.94444	6.48148	5.91168	3.73932	4.87892	0.178063	1.4245	100	21.4031	2.2792	OTHER	0.000393	0.999607
>TRINITY_DN377_c0_g1_i3.p1 TRINITY_DN377_c0_g1~~TRINITY_DN377_c0_g1_i3.p1 ORF type:5prime_partial len:1474 (-),score=263.75 TRINITY_DN377_c0_g1_i3:570-4991(-)	58.66	633.3	25	17	4	11.61	1473	TRINITY_DN377_c0_g1_i3.p1	TRINITY_DN377_c0_g1_i3	AD26A_MOUSE^AD26A_MOUSE^Q:4988-4590,H:351-483^45.985%ID^E:5.57e-26^RecName: Full	Disintegrin and metalloproteinase domain-containing protein 26A	AD26A_MOUSE^AD26A_MOUSE^Q:2-134,H:351-483^45.985%ID^E:1.51e-26^RecName: Full=Disintegrin and metalloproteinase domain-containing protein 26A;^Eukaryota; Metazoa; Chordata; Craniata; Vertebrata; Euteleostomi; Mammalia; Eutheria; Euarchontoglires; Glires; Rodentia; Myomorpha; Muroidea; Muridae; Murinae; Mus; Mus	tr|A0A2B4SM26|A0A2B4SM26_STYPI^tr|A0A2B4SM26|A0A2B4SM26_STYPI^Q:29-340,H:470-573^87.5%ID^E:1.69e-53^.^.	.	ENOG410XX2M^ADAM metallopeptidase domain	KEGG:mmu:13525`KO:K08613	GO:0009897^cellular_component^external side of plasma membrane`GO:0016021^cellular_component^integral component of membrane`GO:1990913^cellular_component^sperm head plasma membrane`GO:0005178^molecular_function^integrin binding`GO:0046872^molecular_function^metal ion binding`GO:0004222^molecular_function^metalloendopeptidase activity`GO:0008237^molecular_function^metallopeptidase activity`GO:0030…	GO:0009897^cellular_component^external side of plasma membrane`GO:0016021^cellular_component^integral component of membrane`GO:1990913^cellular_component^sperm head plasma membrane`GO:0005178^molecular_function^integrin binding`GO:0046872^molecular_function^metal ion binding`GO:0004222^molecular_function^metalloendopeptidase activity`GO:0008237^molecular_function^metallopeptidase activity`GO:0030…	GO:0016021;GO:1990913;GO:0005178;GO:0046872;GO:0004222;GO:0004222;GO:0008237;GO:0030154;GO:0007275;GO:0007283	N	FALSE	FALSE	5.49898	5.29532	7.06042	4.68432	2.78344	9.16497	2.71555	3.32654	6.85675	5.83842	1.69722	5.3632	4.75221	4.00543	4.75221	8.28242	5.83842	5.43109	2.9871	3.66599	100	11.7447	9.43652
>TRINITY_DN39201_c0_g1_i2.p1 TRINITY_DN39201_c0_g1~~TRINITY_DN39201_c0_g1_i2.p1 ORF type:internal len:642 (-),score=72.30 TRINITY_DN39201_c0_g1_i2:2-1924(-)	37.71	615.3	13	10	2	20.44	641	TRINITY_DN39201_c0_g1_i2.p1	TRINITY_DN39201_c0_g1_i2	VWDE_HUMAN^VWDE_HUMAN^Q:1585-1088,H:1394-1586^37.056%ID^E:4.99e-29^RecName: Full	von Willebrand factor D and EGF domain-containing protein	VWDE_HUMAN^VWDE_HUMAN^Q:114-279,H:1394-1586^37.056%ID^E:3.18e-29^RecName: Full=von Willebrand factor D and EGF domain-containing protein;^Eukaryota; Metazoa; Chordata; Craniata; Vertebrata; Euteleostomi; Mammalia; Eutheria; Euarchontoglires; Primates; Haplorrhini; Catarrhini; Hominidae; Homo	tr|A0A2B4R7H4|A0A2B4R7H4_STYPI^tr|A0A2B4R7H4|A0A2B4R7H4_STYPI^Q:3-410,H:222-357^58.088%ID^E:1.27e-47^.^.	.	ENOG410Z37Q^von Willebrand factor D and EGF	KEGG:hsa:221806	GO:0009986^cellular_component^cell surface`GO:0005576^cellular_component^extracellular region`GO:0005102^molecular_function^signaling receptor binding`GO:0048856^biological_process^anatomical structure development	GO:0009986^cellular_component^cell surface`GO:0005576^cellular_component^extracellular region`GO:0005102^molecular_function^signaling receptor binding`GO:0048856^biological_process^anatomical structure development	GO:0005576;GO:0005102;GO:0048856;	N	FALSE	FALSE	5.14821	8.11232	8.58034	5.61622	3.74415	7.80031	2.02808	2.34009	4.83619	6.08424	1.40406	5.46022	5.61622	5.30421	5.61622	6.08424	5.30421	6.08424	0.936037	3.90016	100	14.1966	8.58034
>TRINITY_DN4009_c0_g1_i10.p2 TRINITY_DN4009_c0_g1~~TRINITY_DN4009_c0_g1_i10.p2 ORF type:complete len:450 (+),score=94.69 TRINITY_DN4009_c0_g1_i10:400-1749(+)	3.35	379.3	4	3	0	7.35	449	TRINITY_DN4009_c0_g1_i10.p2	TRINITY_DN4009_c0_g1_i10	LKHA4_BOVIN^LKHA4_BOVIN^Q:298-1746,H:137-611^53.83%ID^E:3.72e-180^RecName: Full	Leukotriene A-4 hydrolase	LKHA4_MOUSE^LKHA4_MOUSE^Q:1-449,H:171-611^52.339%ID^E:1.97e-174^RecName: Full=Leukotriene A-4 hydrolase;^Eukaryota; Metazoa; Chordata; Craniata; Vertebrata; Euteleostomi; Mammalia; Eutheria; Euarchontoglires; Glires; Rodentia; Myomorpha; Muroidea; Muridae; Murinae; Mus; Mus	tr|A0A3M6TAU7|A0A3M6TAU7_9CNID^tr|A0A3M6TAU7|A0A3M6TAU7_9CNID^Q:3676-2192,H:453-941^74.349%ID^E:0^.^.	.	COG0308^aminopeptidase	KEGG:mmu:16993`KO:K01254	GO:0005829^cellular_component^cytosol`GO:0005654^cellular_component^nucleoplasm`GO:0005634^cellular_component^nucleus`GO:0004177^molecular_function^aminopeptidase activity`GO:0004301^molecular_function^epoxide hydrolase activity`GO:0004463^molecular_function^leukotriene-A4 hydrolase activity`GO:0070006^molecular_function^metalloaminopeptidase activity`GO:0008270^molecular_function^zinc ion bindin…	GO:0005737^cellular_component^cytoplasm`GO:0005829^cellular_component^cytosol`GO:0005654^cellular_component^nucleoplasm`GO:0005634^cellular_component^nucleus`GO:0004177^molecular_function^aminopeptidase activity`GO:0004301^molecular_function^epoxide hydrolase activity`GO:0004463^molecular_function^leukotriene-A4 hydrolase activity`GO:0070006^molecular_function^metalloaminopeptidase activity`GO:00…	GO:0005829;GO:0005654;GO:0005634;GO:0004177;GO:0004301;GO:0004301;GO:0004463;GO:0070006;GO:0008270;GO:0044255;GO:0044267;GO:0019370;GO:0006691;GO:0043171	N	+	FALSE	4.89978	2.22717	5.12249	8.90869	6.23608	4.89978	2.67261	4.89978	6.4588	8.68597	2.22717	2.89532	5.79065	4.00891	3.34076	6.23608	6.4588	6.90423	2.44989	4.67706	100	14.0312	13.363	OTHER	0.00139	0.99861
>TRINITY_DN4056_c0_g1_i3.p1 TRINITY_DN4056_c0_g1~~TRINITY_DN4056_c0_g1_i3.p1 ORF type:complete len:1126 (-),score=197.91 TRINITY_DN4056_c0_g1_i3:130-3507(-)	10.39	576.6	5	4	0	3.56	1125	TRINITY_DN4056_c0_g1_i3.p1	TRINITY_DN4056_c0_g1_i3	FBLN2_HUMAN^FBLN2_HUMAN^Q:2883-1960,H:704-1021^37.5%ID^E:2.55e-44^RecName: Full	Fibulin-2	LTBP1_MOUSE^LTBP1_MOUSE^Q:219-515,H:1025-1318^38.742%ID^E:8.32e-44^RecName: Full=Latent-transforming growth factor beta-binding protein 1 {ECO:0000303|PubMed:12711388, ECO:0000303|PubMed:12711389};^Eukaryota; Metazoa; Chordata; Craniata; Vertebrata; Euteleostomi; Mammalia; Eutheria; Euarchontoglires; Glires; Rodentia; Myomorpha; Muroidea; Muridae; Murinae; Mus; Mus	.	.	ENOG410Z7XK^Latent transforming growth factor beta binding protein	KEGG:mmu:268977`KO:K19559	GO:0062023^cellular_component^collagen-containing extracellular matrix`GO:0031012^cellular_component^extracellular matrix`GO:0005576^cellular_component^extracellular region`GO:1903561^cellular_component^extracellular vesicle`GO:0005509^molecular_function^calcium ion binding`GO:0050840^molecular_function^extracellular matrix binding`GO:0030023^molecular_function^extracellular matrix constituent co…	GO:0062023^cellular_component^collagen-containing extracellular matrix`GO:0005737^cellular_component^cytoplasm`GO:0030425^cellular_component^dendrite`GO:0031012^cellular_component^extracellular matrix`GO:0005615^cellular_component^extracellular space`GO:0038045^cellular_component^large latent transforming growth factor-beta complex`GO:0001527^cellular_component^microfibril`GO:0005739^cellular_com…	GO:0005737;GO:0030425;GO:0031012;GO:0005615;GO:0038045;GO:0038045;GO:0001527;GO:0005739;GO:0043025;GO:0048471;GO:0032991;GO:0005509;GO:0050436;GO:0050431;GO:0035904;GO:0060976;GO:0032967;GO:1901388;GO:0035583;GO:0007179;GO:0003281;	N	+	FALSE	6.4	7.73333	7.2	4.8	3.11111	7.55556	1.51111	3.91111	6.57778	5.42222	0.711111	5.6	5.95556	4.08889	2.66667	8.26667	8.08889	6.31111	0.8	3.28889	100	12	7.2	SP(Sec/SPI)	0.98921	0.01079	CS pos: 17-18. IWS-QQ. Pr: 0.7646
>TRINITY_DN4189_c0_g1_i2.p1 TRINITY_DN4189_c0_g1~~TRINITY_DN4189_c0_g1_i2.p1 ORF type:5prime_partial len:2540 (+),score=594.02 TRINITY_DN4189_c0_g1_i2:2-7621(+)	13.39	562.2	17	12	1	4.84	2539	TRINITY_DN4189_c0_g1_i2.p1	TRINITY_DN4189_c0_g1_i2	no blast hit	no blast hit	.	.	.	.	.	.	.		N	FALSE	FALSE	5.12013	0.551398	6.77432	14.297	1.14218	2.79638	1.3785	4.48996	10.3584	11.2249	1.81174	4.3718	0.945254	6.61678	6.49862	7.60142	6.57739	5.55337	0.157542	1.73297	100	21.0713	3.03269
>TRINITY_DN4279_c0_g1_i1.p1 TRINITY_DN4279_c0_g1~~TRINITY_DN4279_c0_g1_i1.p1 ORF type:complete len:1336 (+),score=486.95 TRINITY_DN4279_c0_g1_i1:116-4009(+)	8.77	607.8	2	2	0	1.7	1297	TRINITY_DN4279_c0_g1_i1.p1	TRINITY_DN4279_c0_g1_i1	ANK2_HUMAN^ANK2_HUMAN^Q:2-1546,H:300-813^53.786%ID^E:1.25e-168^RecName: Full	Ankyrin-2	ANK2_MOUSE^ANK2_MOUSE^Q:1-1122,H:300-1417^45.047%ID^E:0^RecName: Full=Ankyrin-2 {ECO:0000250|UniProtKB:Q01484};^Eukaryota; Metazoa; Chordata; Craniata; Vertebrata; Euteleostomi; Mammalia; Eutheria; Euarchontoglires; Glires; Rodentia; Myomorpha; Muroidea; Muridae; Murinae; Mus; Mus	.	.	COG0666^Ankyrin Repeat	KEGG:mmu:109676`KO:K10380	GO:0031672^cellular_component^A band`GO:0016324^cellular_component^apical plasma membrane`GO:0043194^cellular_component^axon initial segment`GO:0016323^cellular_component^basolateral plasma membrane`GO:0005623^cellular_component^cell`GO:0043034^cellular_component^costamere`GO:0005856^cellular_component^cytoskeleton`GO:0005829^cellular_component^cytosol`GO:0005769^cellular_component^early endosome…	GO:0031672^cellular_component^A band`GO:0005623^cellular_component^cell`GO:0043034^cellular_component^costamere`GO:0005737^cellular_component^cytoplasm`GO:0005856^cellular_component^cytoskeleton`GO:0005769^cellular_component^early endosome`GO:0005887^cellular_component^integral component of plasma membrane`GO:0014704^cellular_component^intercalated disc`GO:0005764^cellular_component^lysosome`GO:0…	GO:0005623;GO:0043034;GO:0005737;GO:0005856;GO:0005769;GO:0005769;GO:0005887;GO:0014704;GO:0005764;GO:0031430;GO:0005739;GO:0048471;GO:0005886;GO:0014069;GO:0045211;GO:0055037;GO:0042383;GO:0030315;GO:0030018;GO:0051117;GO:0044325;GO:0015459;GO:0030674;GO:0086014;GO:0086066;GO:0060048;GO:0006874;GO:0034613;GO:0006897;GO:1901021;GO:0051928;GO:2001259;GO:0010628;GO:1901018;GO:0043268;GO:0008104;GO:…	N	+	FALSE	8.63531	1.31072	6.32228	8.55821	2.46723	6.63069	3.00694	4.54896	4.93446	10.8712	2.08173	4.47186	5.39707	3.23824	5.01157	6.55359	5.47417	7.4788	0.539707	2.46723	100	14.8805	5.47417	OTHER	0.002724	0.997276
>TRINITY_DN4382_c0_g1_i10.p1 TRINITY_DN4382_c0_g1~~TRINITY_DN4382_c0_g1_i10.p1 ORF type:complete len:286 (+),score=60.71 TRINITY_DN4382_c0_g1_i10:480-1337(+)	18.09	579.3	7	5	0	21.75	285	TRINITY_DN4382_c0_g1_i10.p1	TRINITY_DN4382_c0_g1_i10	COCA1_MOUSE^COCA1_MOUSE^Q:843-1319,H:459-617^29.697%ID^E:1.39e-12^RecName: Full	Collagen alpha-1(XII) chain	COCA1_MOUSE^COCA1_MOUSE^Q:122-280,H:459-617^29.697%ID^E:1.78e-13^RecName: Full=Collagen alpha-1(XII) chain;^Eukaryota; Metazoa; Chordata; Craniata; Vertebrata; Euteleostomi; Mammalia; Eutheria; Euarchontoglires; Glires; Rodentia; Myomorpha; Muroidea; Muridae; Murinae; Mus; Mus	.	.	ENOG4111RUM^collagen, type XII, alpha 1	KEGG:mmu:12816`KO:K08132	GO:0005595^cellular_component^collagen type XII trimer`GO:0062023^cellular_component^collagen-containing extracellular matrix`GO:0031012^cellular_component^extracellular matrix`GO:0005615^cellular_component^extracellular space`GO:0007155^biological_process^cell adhesion`GO:0035987^biological_process^endodermal cell differentiation`GO:0003429^biological_process^growth plate cartilage chondrocyte m…	GO:0005595^cellular_component^collagen type XII trimer`GO:0062023^cellular_component^collagen-containing extracellular matrix`GO:0031012^cellular_component^extracellular matrix`GO:0005615^cellular_component^extracellular space`GO:0007155^biological_process^cell adhesion`GO:0035987^biological_process^endodermal cell differentiation`GO:0003429^biological_process^growth plate cartilage chondrocyte m…	GO:0062023;GO:0031012;GO:0005615;GO:0007155;GO:0035987;GO:0035987;GO:0003429;	N	+	FALSE	8.42105	2.10526	7.01754	3.85965	2.45614	7.7193	1.75439	3.50877	8.07018	7.7193	1.40351	4.5614	4.91228	5.61404	4.91228	7.36842	5.26316	9.47368	2.10526	1.75439	100	10.8772	6.31579	OTHER	0.005107	0.994893
>TRINITY_DN4382_c0_g1_i17.p1 TRINITY_DN4382_c0_g1~~TRINITY_DN4382_c0_g1_i17.p1 ORF type:3prime_partial len:362 (+),score=70.22 TRINITY_DN4382_c0_g1_i17:134-1216(+)	4.84	484.8	2	2	0	4.71	361	TRINITY_DN4382_c0_g1_i17.p1	TRINITY_DN4382_c0_g1_i17	MLP_ACRMI^MLP_ACRMI^Q:596-796,H:249-313^50.746%ID^E:3.25e-16^RecName: Full	Mucin-like protein {ECO:0000303|PubMed:23765379}	MLP_ACRMI^MLP_ACRMI^Q:155-221,H:249-313^50.746%ID^E:1.26e-16^RecName: Full=Mucin-like protein {ECO:0000303|PubMed:23765379};^Eukaryota; Metazoa; Cnidaria; Anthozoa; Hexacorallia; Scleractinia; Astrocoeniina; Acroporidae; Acropora	.	.	.	.	GO:0016021^cellular_component^integral component of membrane`GO:0005509^molecular_function^calcium ion binding`GO:0007160^biological_process^cell-matrix adhesion	GO:0016021^cellular_component^integral component of membrane`GO:0005509^molecular_function^calcium ion binding`GO:0007160^biological_process^cell-matrix adhesion	GO:0005509;GO:0007160	N	FALSE	+	6.6482	6.09418	6.6482	8.86427	2.21607	9.69529	1.66205	1.38504	8.31025	7.20222	1.66205	5.81717	3.3241	3.3241	4.98615	5.54017	4.15512	4.98615	3.3241	4.15512	100	15.5125	9.69529
>TRINITY_DN44558_c0_g3_i1.p1 TRINITY_DN44558_c0_g3~~TRINITY_DN44558_c0_g3_i1.p1 ORF type:complete len:149 (+),score=32.02 TRINITY_DN44558_c0_g3_i1:135-581(+)	2.1	365.5	3	2	0	12.16	148	TRINITY_DN44558_c0_g3_i1.p1	TRINITY_DN44558_c0_g3_i1	COFI_GIBZE^COFI_GIBZE^Q:135-566,H:1-145^32.075%ID^E:4.87e-17^RecName: Full	Cofilin	COFI_GIBZE^COFI_GIBZE^Q:1-148,H:1-149^32.515%ID^E:5.43e-20^RecName: Full=Cofilin;^Eukaryota; Fungi; Dikarya; Ascomycota; Pezizomycotina; Sordariomycetes; Hypocreomycetidae; Hypocreales; Nectriaceae; Fusarium	.	.	ENOG41122P5^actin-depolymerizing factor	KEGG:fgr:FGSG_06245`KO:K05765	GO:0015629^cellular_component^actin cytoskeleton`GO:0005737^cellular_component^cytoplasm`GO:0016363^cellular_component^nuclear matrix`GO:0003779^molecular_function^actin binding`GO:0030042^biological_process^actin filament depolymerization`GO:0007049^biological_process^cell cycle`GO:0051301^biological_process^cell division	GO:0015629^cellular_component^actin cytoskeleton`GO:0005737^cellular_component^cytoplasm`GO:0016363^cellular_component^nuclear matrix`GO:0003779^molecular_function^actin binding`GO:0030042^biological_process^actin filament depolymerization`GO:0007049^biological_process^cell cycle`GO:0051301^biological_process^cell division	GO:0005737;GO:0016363;GO:0003779;GO:0030042;GO:0007049;GO:0007049;GO:0051301;	N	+	FALSE	6.08108	2.02703	10.1351	8.10811	4.72973	6.08108	1.35135	8.10811	15.5405	3.37838	4.05405	3.37838	3.37838	1.35135	2.02703	6.08108	3.37838	6.75676	0.675676	3.37838	100	18.2432	8.78378	OTHER	0.001027	0.998973
>TRINITY_DN47372_c0_g1_i10.p1 TRINITY_DN47372_c0_g1~~TRINITY_DN47372_c0_g1_i10.p1 ORF type:complete len:308 (-),score=66.09 TRINITY_DN47372_c0_g1_i10:61-984(-)	4.72	410	6	5	1	13.68	307	TRINITY_DN47372_c0_g1_i10.p1	TRINITY_DN47372_c0_g1_i10	FBCD1_MACFA^FBCD1_MACFA^Q:684-67,H:212-427^46.606%ID^E:1.43e-53^RecName: Full	Fibrinogen C domain-containing protein 1	FBCD1_MACFA^FBCD1_MACFA^Q:101-306,H:212-427^46.606%ID^E:3.98e-55^RecName: Full=Fibrinogen C domain-containing protein 1;^Eukaryota; Metazoa; Chordata; Craniata; Vertebrata; Euteleostomi; Mammalia; Eutheria; Euarchontoglires; Primates; Haplorrhini; Catarrhini; Cercopithecidae; Cercopithecinae; Macaca	.	.	.	KEGG:mcf:102115035	GO:0016021^cellular_component^integral component of membrane`GO:0016020^cellular_component^membrane`GO:0008061^molecular_function^chitin binding`GO:0046872^molecular_function^metal ion binding	GO:0016021^cellular_component^integral component of membrane`GO:0016020^cellular_component^membrane`GO:0008061^molecular_function^chitin binding`GO:0046872^molecular_function^metal ion binding	GO:0016020;GO:0008061;GO:0046872;	N	+	FALSE	7.16612	2.60586	6.84039	6.18893	2.60586	11.0749	0.651466	2.28013	9.77199	9.44625	1.62866	6.51466	2.9316	3.90879	4.56026	5.86319	4.88599	5.86319	2.28013	2.9316	100	13.0293	7.81759	SP(Sec/SPI)	0.999057	0.000943	CS pos: 19-20. SLA-KN. Pr: 0.9570
>TRINITY_DN49056_c0_g1_i1.p2 TRINITY_DN49056_c0_g1~~TRINITY_DN49056_c0_g1_i1.p2 ORF type:internal len:170 (+),score=18.76 TRINITY_DN49056_c0_g1_i1:3-509(+)	17.46	785.8	11	3	1	20.12	169	TRINITY_DN49056_c0_g1_i1.p2	TRINITY_DN49056_c0_g1_i1	HMCN1_HUMAN^HMCN1_HUMAN^Q:15-506,H:4574-4737^53.659%ID^E:4.35e-33^RecName: Full	Hemicentin-1	HMCN1_HUMAN^HMCN1_HUMAN^Q:5-168,H:4574-4737^53.659%ID^E:1.45e-55^RecName: Full=Hemicentin-1;^Eukaryota; Metazoa; Chordata; Craniata; Vertebrata; Euteleostomi; Mammalia; Eutheria; Euarchontoglires; Primates; Haplorrhini; Catarrhini; Hominidae; Homo	.	.	ENOG410ZN3C^von Willebrand factor A domain containing 7	KEGG:hsa:83872`KO:K17341	GO:0005604^cellular_component^basement membrane`GO:0005938^cellular_component^cell cortex`GO:0032154^cellular_component^cleavage furrow`GO:0062023^cellular_component^collagen-containing extracellular matrix`GO:0070062^cellular_component^extracellular exosome`GO:0005509^molecular_function^calcium ion binding`GO:0050839^molecular_function^cell adhesion molecule binding`GO:0005201^molecular_function…	GO:0005604^cellular_component^basement membrane`GO:0005938^cellular_component^cell cortex`GO:0032154^cellular_component^cleavage furrow`GO:0062023^cellular_component^collagen-containing extracellular matrix`GO:0070062^cellular_component^extracellular exosome`GO:0005509^molecular_function^calcium ion binding`GO:0050839^molecular_function^cell adhesion molecule binding`GO:0005201^molecular_function…	GO:0005938;GO:0032154;GO:0062023;GO:0070062;GO:0005509;GO:0005509;GO:0050839;GO:0005201;GO:0042803;GO:0038023;GO:0007049;GO:0051301;GO:0007157;GO:0007156;GO:0009617;GO:0007601	N	FALSE	FALSE	5.32544	10.0592	6.50888	5.91716	0	13.0178	1.77515	1.77515	3.5503	0	0	4.14201	8.87574	5.32544	5.32544	14.2012	5.32544	3.5503	3.5503	1.77515	100	12.426	5.32544
>TRINITY_DN492_c0_g1_i1.p1 TRINITY_DN492_c0_g1~~TRINITY_DN492_c0_g1_i1.p1 ORF type:complete len:547 (-),score=164.71 TRINITY_DN492_c0_g1_i1:1175-2815(-)	25.86	736.3	10	7	0	10.62	546	TRINITY_DN492_c0_g1_i1.p1	TRINITY_DN492_c0_g1_i1	SRC8_CHICK^SRC8_CHICK^Q:2815-1754,H:11-366^63.764%ID^E:2.42e-137^RecName: Full	Src substrate protein p85	SRC8_HUMAN^SRC8_HUMAN^Q:1-544,H:1-547^55.596%ID^E:0^RecName: Full=Src substrate cortactin;^Eukaryota; Metazoa; Chordata; Craniata; Vertebrata; Euteleostomi; Mammalia; Eutheria; Euarchontoglires; Primates; Haplorrhini; Catarrhini; Hominidae; Homo	tr|A0A3M6TC62|A0A3M6TC62_9CNID^tr|A0A3M6TC62|A0A3M6TC62_9CNID^Q:1130-480,H:308-521^79.358%ID^E:1.24e-77^.^.	.	ENOG410XTAK^Hematopoietic cell-specific lyn substrate 1	KEGG:hsa:2017`KO:K06106	GO:0030054^cellular_component^cell junction`GO:0005905^cellular_component^clathrin-coated pit`GO:0030864^cellular_component^cortical actin cytoskeleton`GO:0030863^cellular_component^cortical cytoskeleton`GO:0030425^cellular_component^dendrite`GO:0043197^cellular_component^dendritic spine`GO:0005783^cellular_component^endoplasmic reticulum`GO:0005925^cellular_component^focal adhesion`GO:0030027^ce…	GO:0005938^cellular_component^cell cortex`GO:0005905^cellular_component^clathrin-coated pit`GO:0030864^cellular_component^cortical actin cytoskeleton`GO:0030863^cellular_component^cortical cytoskeleton`GO:0005737^cellular_component^cytoplasm`GO:0005856^cellular_component^cytoskeleton`GO:0005829^cellular_component^cytosol`GO:0030425^cellular_component^dendrite`GO:0043197^cellular_component^dendrit…	GO:0005905;GO:0030864;GO:0030863;GO:0005737;GO:0005856;GO:0005856;GO:0005829;GO:0030425;GO:0043197;GO:0005925;GO:0005794;GO:0043231;GO:0030027;GO:1990023;GO:0005886;GO:0002102;GO:0014069;GO:0045211;GO:0001726;GO:0030427;GO:0008076;GO:0051015;GO:0045296;GO:0005522;GO:0031532;GO:0030041;GO:0048870;GO:0097062;GO:0048041;GO:0006886;GO:0097581;GO:0061024;GO:2001237;GO:0048812;GO:0030838;GO:0045773;GO:…	N	+	FALSE	10.8059	0.18315	9.89011	13.7363	3.2967	10.4396	2.1978	1.28205	8.60806	1.0989	1.0989	1.0989	1.4652	7.32601	6.59341	6.77656	3.11355	5.67766	1.4652	3.84615	100	23.6264	8.60806	OTHER	0.000697	0.999303
>TRINITY_DN502_c0_g1_i3.p1 TRINITY_DN502_c0_g1~~TRINITY_DN502_c0_g1_i3.p1 ORF type:complete len:201 (-),score=59.88 TRINITY_DN502_c0_g1_i3:691-1263(-)	24.57	710.9	11	5	0	40.53	190	TRINITY_DN502_c0_g1_i3.p1	TRINITY_DN502_c0_g1_i3	EFHD2_DROME^EFHD2_DROME^Q:1260-799,H:28-184^59.873%ID^E:1.17e-39^RecName: Full	EF-hand domain-containing protein D2 homolog	EFHD2_BOVIN^EFHD2_BOVIN^Q:13-197,H:56-241^60.753%ID^E:2.68e-64^RecName: Full=EF-hand domain-containing protein D2;^Eukaryota; Metazoa; Chordata; Craniata; Vertebrata; Euteleostomi; Mammalia; Eutheria; Laurasiatheria; Artiodactyla; Ruminantia; Pecora; Bovidae; Bovinae; Bos	tr|A0A3M6TSI7|A0A3M6TSI7_9CNID^tr|A0A3M6TSI7|A0A3M6TSI7_9CNID^Q:570-193,H:12-137^80.952%ID^E:4.43e-74^.^.	.	ENOG4111JG9^EF-hand domain family, member	KEGG:bta:514259	GO:0005927^cellular_component^muscle tendon junction`GO:0005886^cellular_component^plasma membrane`GO:0005509^molecular_function^calcium ion binding`GO:0007498^biological_process^mesoderm development	GO:0045121^cellular_component^membrane raft`GO:0005509^molecular_function^calcium ion binding	GO:0005509;	N	+	FALSE	8.94737	0	6.84211	12.6316	7.36842	5.26316	1.57895	3.15789	10	7.36842	3.68421	3.15789	1.57895	8.42105	7.36842	4.73684	1.57895	5.26316	0	1.05263	100	19.4737	8.42105	OTHER	0.000467	0.999533
>TRINITY_DN5029_c0_g1_i8.p1 TRINITY_DN5029_c0_g1~~TRINITY_DN5029_c0_g1_i8.p1 ORF type:5prime_partial len:1870 (-),score=786.39 TRINITY_DN5029_c0_g1_i8:395-6004(-)	26.39	706.8	10	8	0	4.44	1869	TRINITY_DN5029_c0_g1_i8.p1	TRINITY_DN5029_c0_g1_i8	SPTN1_RAT^SPTN1_RAT^Q:5944-407,H:565-2470^58.857%ID^E:0^RecName: Full	Spectrin alpha chain, non-erythrocytic 1	SPTN1_RAT^SPTN1_RAT^Q:3-1866,H:547-2470^58.723%ID^E:0^RecName: Full=Spectrin alpha chain, non-erythrocytic 1;^Eukaryota; Metazoa; Chordata; Craniata; Vertebrata; Euteleostomi; Mammalia; Eutheria; Euarchontoglires; Glires; Rodentia; Myomorpha; Muroidea; Muridae; Murinae; Rattus	.	.	COG5069^Microtubule associated monoxygenase, calponin and LIM domain containing	KEGG:rno:64159`KO:K06114	GO:0030863^cellular_component^cortical cytoskeleton`GO:0032437^cellular_component^cuticular plate`GO:0005829^cellular_component^cytosol`GO:0005916^cellular_component^fascia adherens`GO:0016328^cellular_component^lateral plasma membrane`GO:0016020^cellular_component^membrane`GO:0033270^cellular_component^paranode region of axon`GO:0005886^cellular_component^plasma membrane`GO:0032991^cellular_comp…	GO:0030863^cellular_component^cortical cytoskeleton`GO:0032437^cellular_component^cuticular plate`GO:0005829^cellular_component^cytosol`GO:0005916^cellular_component^fascia adherens`GO:0016328^cellular_component^lateral plasma membrane`GO:0016020^cellular_component^membrane`GO:0033270^cellular_component^paranode region of axon`GO:0005886^cellular_component^plasma membrane`GO:0032991^cellular_comp…	GO:0032437;GO:0005829;GO:0005916;GO:0016328;GO:0016020;GO:0016020;GO:0033270;GO:0005886;GO:0032991;GO:0008091;GO:0030018;GO:0003779;GO:0005509;GO:0005516;GO:0046982;GO:0044877;GO:0030507;GO:0019905;GO:0031532;GO:0051693	N	FALSE	FALSE	9.14928	0.749064	8.93526	11.985	2.94275	3.95934	2.78224	4.7084	7.59765	9.4703	1.60514	3.63831	1.28411	7.27662	6.15302	6.20653	3.42429	4.33387	1.60514	2.19369	100	20.9203	6.74157
>TRINITY_DN5031_c0_g1_i2.p1 TRINITY_DN5031_c0_g1~~TRINITY_DN5031_c0_g1_i2.p1 ORF type:complete len:612 (+),score=96.54 TRINITY_DN5031_c0_g1_i2:72-1838(+)	3.07	405	3	3	1	5.44	588	TRINITY_DN5031_c0_g1_i2.p1	TRINITY_DN5031_c0_g1_i2	ADDA_PONAB^ADDA_PONAB^Q:168-1358,H:44-450^42.619%ID^E:1.48e-95^RecName: Full	Alpha-adducin	ADDA_HUMAN^ADDA_HUMAN^Q:56-452,H:44-450^42.619%ID^E:3.29e-101^RecName: Full=Alpha-adducin;^Eukaryota; Metazoa; Chordata; Craniata; Vertebrata; Euteleostomi; Mammalia; Eutheria; Euarchontoglires; Primates; Haplorrhini; Catarrhini; Hominidae; Homo	.	.	COG0235^Class II aldolase adducin	KEGG:hsa:118`KO:K18622	GO:0005737^cellular_component^cytoplasm`GO:0005856^cellular_component^cytoskeleton`GO:0005886^cellular_component^plasma membrane`GO:0003779^molecular_function^actin binding`GO:0005516^molecular_function^calmodulin binding	GO:0005623^cellular_component^cell`GO:0005737^cellular_component^cytoplasm`GO:0005856^cellular_component^cytoskeleton`GO:0005829^cellular_component^cytosol`GO:0008290^cellular_component^F-actin capping protein complex`GO:0005925^cellular_component^focal adhesion`GO:0016604^cellular_component^nuclear body`GO:0005654^cellular_component^nucleoplasm`GO:0005634^cellular_component^nucleus`GO:0005886^ce…	GO:0005737;GO:0005856;GO:0005829;GO:0008290;GO:0005925;GO:0005925;GO:0016604;GO:0005654;GO:0005634;GO:0005886;GO:0044853;GO:0014069;GO:0003779;GO:0051015;GO:0045296;GO:0005516;GO:0046982;GO:0042803;GO:0003723;GO:0030507;GO:0005200;GO:0008134;GO:0030036;GO:0051017;GO:0051016;GO:0000902;GO:0006884;GO:0071277;GO:0030218;GO:0020027;GO:0048873;GO:0001701;GO:0036498;GO:0035264;GO:1903393;GO:1903142;GO:…	N	+	FALSE	7.82313	1.02041	6.29252	8.67347	2.72109	7.82313	2.04082	5.10204	7.9932	6.63265	1.87075	4.42177	4.08163	3.06122	6.80272	6.46259	5.61224	7.82313	0.510204	3.23129	100	14.966	6.46259	OTHER	0.000558	0.999442
>TRINITY_DN507_c0_g1_i17.p1 TRINITY_DN507_c0_g1~~TRINITY_DN507_c0_g1_i17.p1 ORF type:internal len:878 (-),score=151.82 TRINITY_DN507_c0_g1_i17:2-2632(-)	2.6	307.1	3	2	0	2.39	877	TRINITY_DN507_c0_g1_i17.p1	TRINITY_DN507_c0_g1_i17	MLRP2_ACRMI^MLRP2_ACRMI^Q:1552-563,H:891-1244^39.548%ID^E:2.73e-57^RecName: Full	MAM and LDL-receptor class A domain-containing protein 2	MLRP2_ACRMI^MLRP2_ACRMI^Q:356-690,H:886-1244^40.39%ID^E:9.28e-66^RecName: Full=MAM and LDL-receptor class A domain-containing protein 2;^Eukaryota; Metazoa; Cnidaria; Anthozoa; Hexacorallia; Scleractinia; Astrocoeniina; Acroporidae; Acropora	.	.	.	.	GO:0005576^cellular_component^extracellular region`GO:0016020^cellular_component^membrane	GO:0005576^cellular_component^extracellular region`GO:0016020^cellular_component^membrane	GO:0016020;	N	FALSE	FALSE	6.49943	3.42075	5.58723	2.62258	3.07868	11.6306	2.50855	4.21893	3.76283	5.35918	1.3683	4.1049	8.09578	5.24515	4.561	10.4903	6.27138	6.27138	2.05245	2.85063	100	8.20981	7.98176
>TRINITY_DN51412_c0_g1_i2.p1 TRINITY_DN51412_c0_g1~~TRINITY_DN51412_c0_g1_i2.p1 ORF type:complete len:366 (+),score=67.35 TRINITY_DN51412_c0_g1_i2:108-1205(+)	10.49	569.4	2	2	0	6.3	365	TRINITY_DN51412_c0_g1_i2.p1	TRINITY_DN51412_c0_g1_i2	no blast hit	no blast hit	.	.	ExpAA=44.66^PredHel=2^Topology=i183-205o215-237i	.	.	.	.		N	+	FALSE	11.2329	0	8.76712	3.28767	2.46575	6.84932	0.547945	6.84932	10.411	10.9589	1.64384	4.38356	4.10959	6.30137	1.09589	6.0274	6.30137	6.0274	1.09589	1.64384	100	12.0548	5.20548	OTHER	0.001216	0.998784
>TRINITY_DN5412_c0_g1_i4.p1 TRINITY_DN5412_c0_g1~~TRINITY_DN5412_c0_g1_i4.p1 ORF type:5prime_partial len:712 (-),score=135.47 TRINITY_DN5412_c0_g1_i4:571-2706(-)	22.44	542.1	11	10	1	12.24	711	TRINITY_DN5412_c0_g1_i4.p1	TRINITY_DN5412_c0_g1_i4	CANB_DROME^CANB_DROME^Q:2547-580,H:257-923^47.407%ID^E:0^RecName: Full	Calpain-B	CANB_DROME^CANB_DROME^Q:54-709,H:257-923^47.407%ID^E:0^RecName: Full=Calpain-B;^Eukaryota; Metazoa; Ecdysozoa; Arthropoda; Hexapoda; Insecta; Pterygota; Neoptera; Holometabola; Diptera; Brachycera; Muscomorpha; Ephydroidea; Drosophilidae; Drosophila; Sophophora	.	.	ENOG410XP0B^Calpain-like cysteine peptidase	KEGG:dme:Dmel_CG8107`KO:K08585	GO:0005737^cellular_component^cytoplasm`GO:0016020^cellular_component^membrane`GO:0005509^molecular_function^calcium ion binding`GO:0004198^molecular_function^calcium-dependent cysteine-type endopeptidase activity`GO:0007298^biological_process^border follicle cell migration`GO:0016322^biological_process^neuron remodeling`GO:0016540^biological_process^protein autoprocessing`GO:0006508^biological_p…	GO:0005737^cellular_component^cytoplasm`GO:0016020^cellular_component^membrane`GO:0005509^molecular_function^calcium ion binding`GO:0004198^molecular_function^calcium-dependent cysteine-type endopeptidase activity`GO:0007298^biological_process^border follicle cell migration`GO:0016322^biological_process^neuron remodeling`GO:0016540^biological_process^protein autoprocessing`GO:0006508^biological_p…	GO:0016020;GO:0005509;GO:0004198;GO:0007298;GO:0016322;GO:0016322;GO:0016540;GO:0006508	N	FALSE	FALSE	7.173	1.40647	8.15752	6.61041	6.04782	7.73558	1.40647	4.5007	7.59494	8.72011	2.53165	4.07876	4.21941	2.53165	6.04782	7.59494	3.37553	5.48523	2.391	2.391	100	14.7679	10.8298
>TRINITY_DN54326_c0_g1_i2.p1 TRINITY_DN54326_c0_g1~~TRINITY_DN54326_c0_g1_i2.p1 ORF type:5prime_partial len:662 (-),score=87.07 TRINITY_DN54326_c0_g1_i2:291-2276(-)	19.62	592.5	8	7	1	10.74	661	TRINITY_DN54326_c0_g1_i2.p1	TRINITY_DN54326_c0_g1_i2	LAMB1_HUMAN^LAMB1_HUMAN^Q:2276-537,H:1120-1709^24.207%ID^E:1.16e-27^RecName: Full	Laminin subunit beta-1	LAMB2_RAT^LAMB2_RAT^Q:1-642,H:1134-1783^26.119%ID^E:1.77e-47^RecName: Full=Laminin subunit beta-2;^Eukaryota; Metazoa; Chordata; Craniata; Vertebrata; Euteleostomi; Mammalia; Eutheria; Euarchontoglires; Glires; Rodentia; Myomorpha; Muroidea; Muridae; Murinae; Rattus	.	.	ENOG410XPEG^laminin beta	KEGG:rno:25473`KO:K06243	GO:0005604^cellular_component^basement membrane`GO:0062023^cellular_component^collagen-containing extracellular matrix`GO:0005788^cellular_component^endoplasmic reticulum lumen`GO:0070062^cellular_component^extracellular exosome`GO:0005576^cellular_component^extracellular region`GO:0005615^cellular_component^extracellular space`GO:0043256^cellular_component^laminin complex`GO:0005606^cellular_com…	GO:0005604^cellular_component^basement membrane`GO:0043256^cellular_component^laminin complex`GO:0005608^cellular_component^laminin-3 complex`GO:0031594^cellular_component^neuromuscular junction`GO:0045202^cellular_component^synapse`GO:0043083^cellular_component^synaptic cleft`GO:0005201^molecular_function^extracellular matrix structural constituent`GO:0005178^molecular_function^integrin binding`…	GO:0043256;GO:0005608;GO:0031594;GO:0045202;GO:0043083;GO:0043083;GO:0005201;GO:0005178;GO:0009887;GO:0014002;GO:0048677;GO:0007411;GO:0070831;GO:0016477;GO:0000904;GO:0072274;GO:0072249;GO:0007528;GO:0031175;GO:0060041;GO:0014044;GO:0034446;GO:0050808;GO:0009888;GO:0007601;	N	FALSE	FALSE	10.1362	3.02572	4.99244	9.83359	1.51286	5.59758	0.75643	6.80787	7.86687	9.37973	1.96672	5.74887	2.42057	5.14372	7.11044	5.44629	5.29501	5.14372	0.302572	1.51286	100	14.826	3.32829
>TRINITY_DN5487_c0_g1_i3.p1 TRINITY_DN5487_c0_g1~~TRINITY_DN5487_c0_g1_i3.p1 ORF type:complete len:1301 (+),score=379.13 TRINITY_DN5487_c0_g1_i3:115-4017(+)	11.4	664.6	7	7	1	4	1300	TRINITY_DN5487_c0_g1_i3.p1	TRINITY_DN5487_c0_g1_i3	ANX13_HUMAN^ANX13_HUMAN^Q:460-1119,H:92-312^41.892%ID^E:3.9e-40^RecName: Full	Annexin A13	ANX13_HUMAN^ANX13_HUMAN^Q:116-335,H:92-312^41.892%ID^E:2.03e-38^RecName: Full=Annexin A13;^Eukaryota; Metazoa; Chordata; Craniata; Vertebrata; Euteleostomi; Mammalia; Eutheria; Euarchontoglires; Primates; Haplorrhini; Catarrhini; Hominidae; Homo	tr|A0A3M6UPC3|A0A3M6UPC3_9CNID^tr|A0A3M6UPC3|A0A3M6UPC3_9CNID^Q:1322-540,H:283-524^79.545%ID^E:3.74e-142^.^.	.	ENOG410XPUN^annexin A7	KEGG:hsa:312`KO:K17099	GO:0016324^cellular_component^apical plasma membrane`GO:0016323^cellular_component^basolateral plasma membrane`GO:0031410^cellular_component^cytoplasmic vesicle`GO:0070382^cellular_component^exocytic vesicle`GO:0070062^cellular_component^extracellular exosome`GO:0005615^cellular_component^extracellular space`GO:0019898^cellular_component^extrinsic component of membrane`GO:0045121^cellular_compone…	GO:0016324^cellular_component^apical plasma membrane`GO:0016323^cellular_component^basolateral plasma membrane`GO:0031410^cellular_component^cytoplasmic vesicle`GO:0070382^cellular_component^exocytic vesicle`GO:0070062^cellular_component^extracellular exosome`GO:0005615^cellular_component^extracellular space`GO:0019898^cellular_component^extrinsic component of membrane`GO:0045121^cellular_compone…	GO:0016323;GO:0031410;GO:0070382;GO:0070062;GO:0005615;GO:0005615;GO:0019898;GO:0045121;GO:0005654;GO:0005886;GO:0005509;GO:0005544;GO:1901611;GO:0001786;GO:0030154;GO:0042997;GO:0042998;	N	+	FALSE	6.30769	1	7.23077	15.5385	1.53846	4.61538	2.53846	3.69231	8.46154	7	2.46154	3.07692	3.07692	3.84615	10.6154	4.46154	4.84615	6.30769	1.76923	1.61538	100	22.7692	4.92308	OTHER	0.004479	0.995521
>TRINITY_DN56015_c0_g1_i1.p2 TRINITY_DN56015_c0_g1~~TRINITY_DN56015_c0_g1_i1.p2 ORF type:complete len:143 (+),score=35.84 TRINITY_DN56015_c0_g1_i1:124-552(+)	3.14	466.5	3	2	0	15.49	142	TRINITY_DN56015_c0_g1_i1.p2	TRINITY_DN56015_c0_g1_i1	no blast hit	no blast hit	.	.	.	.	.	.	.		N	+	FALSE	10.5634	0.704225	7.04225	7.74648	4.22535	5.6338	3.52113	4.92958	12.6761	7.74648	2.8169	2.8169	1.40845	2.11268	1.40845	10.5634	2.8169	7.74648	2.8169	0.704225	100	14.7887	7.74648	OTHER	0.00103	0.99897
>TRINITY_DN566_c0_g1_i19.p1 TRINITY_DN566_c0_g1~~TRINITY_DN566_c0_g1_i19.p1 ORF type:complete len:362 (-),score=58.98 TRINITY_DN566_c0_g1_i19:290-1348(-)	2.53	455.3	5	5	0	14.49	352	TRINITY_DN566_c0_g1_i19.p1	TRINITY_DN566_c0_g1_i19	no blast hit	no blast hit	.	.	.	.	.	.	.		N	+	FALSE	7.10227	0.852273	7.38636	5.68182	4.26136	7.10227	1.70455	6.81818	11.3636	6.25	1.98864	5.11364	3.69318	2.27273	5.39773	6.53409	3.69318	5.11364	2.84091	4.82955	100	13.0682	11.9318	SP(Sec/SPI)	0.992949	0.007051	CS pos: 20-21. ASA-ES. Pr: 0.6845
>TRINITY_DN570_c0_g2_i1.p1 TRINITY_DN570_c0_g2~~TRINITY_DN570_c0_g2_i1.p1 ORF type:5prime_partial len:1063 (-),score=212.73 TRINITY_DN570_c0_g2_i1:149-3337(-)	109.48	1058.4	20	15	14	18.27	1062	TRINITY_DN570_c0_g2_i1.p1	TRINITY_DN570_c0_g2_i1	CO3A1_RAT^CO3A1_RAT^Q:838-155,H:1228-1462^38.655%ID^E:2.88e-41^RecName: Full	Collagen alpha-1(III) chain	CO1A2_RAT^CO1A2_RAT^Q:2-1062,H:124-1372^39.377%ID^E:2.05e-159^RecName: Full=Collagen alpha-2(I) chain;^Eukaryota; Metazoa; Chordata; Craniata; Vertebrata; Euteleostomi; Mammalia; Eutheria; Euarchontoglires; Glires; Rodentia; Myomorpha; Muroidea; Muridae; Murinae; Rattus	.	.	ENOG410ZZWR^collagen, type	KEGG:rno:84352`KO:K06236	GO:0005581^cellular_component^collagen trimer`GO:0005586^cellular_component^collagen type III trimer`GO:0062023^cellular_component^collagen-containing extracellular matrix`GO:0031012^cellular_component^extracellular matrix`GO:0005615^cellular_component^extracellular space`GO:0005201^molecular_function^extracellular matrix structural constituent`GO:0005178^molecular_function^integrin binding`GO:00…	GO:0005581^cellular_component^collagen trimer`GO:0005584^cellular_component^collagen type I trimer`GO:0031012^cellular_component^extracellular matrix`GO:0005576^cellular_component^extracellular region`GO:0005615^cellular_component^extracellular space`GO:0005201^molecular_function^extracellular matrix structural constituent`GO:0042802^molecular_function^identical protein binding`GO:0046872^molecul…	GO:0005584;GO:0031012;GO:0005576;GO:0005615;GO:0005201;GO:0005201;GO:0042802;GO:0046872;GO:0048407;GO:0002020;GO:0030674;GO:0046332;GO:0001568;GO:0030282;GO:0071230;GO:0071310;GO:0071300;GO:0097067;GO:0030199;GO:0032963;GO:0085029;GO:0030198;GO:0070208;GO:0008217;GO:0071873;GO:0007266;GO:0001501;GO:0043589;GO:0007179;	N	FALSE	FALSE	10.6403	0.659134	5.17891	4.61394	1.12994	28.5311	0.847458	2.25989	2.63653	2.63653	0.753296	2.82486	8.94539	4.7081	6.77966	7.15631	4.51977	3.48399	0.47081	1.22411	100	9.79284	2.82486
>TRINITY_DN5790_c0_g1_i14.p1 TRINITY_DN5790_c0_g1~~TRINITY_DN5790_c0_g1_i14.p1 ORF type:internal len:277 (+),score=52.71 TRINITY_DN5790_c0_g1_i14:1-828(+)	26.93	856.3	6	5	2	11.96	276	TRINITY_DN5790_c0_g1_i14.p1	TRINITY_DN5790_c0_g1_i14	no blast hit	no blast hit	.	.	.	.	.	.	.		N	FALSE	FALSE	4.71014	4.71014	3.62319	3.62319	2.17391	15.942	3.26087	2.89855	7.97101	2.53623	1.81159	1.81159	5.7971	16.6667	1.08696	6.88406	1.08696	3.62319	0.724638	9.05797	100	7.24638	11.9565
>TRINITY_DN5807_c0_g1_i2.p1 TRINITY_DN5807_c0_g1~~TRINITY_DN5807_c0_g1_i2.p1 ORF type:complete len:596 (+),score=73.97 TRINITY_DN5807_c0_g1_i2:149-1936(+)	4.55	566	4	4	0	3.87	595	TRINITY_DN5807_c0_g1_i2.p1	TRINITY_DN5807_c0_g1_i2	NLGNX_HUMAN^NLGNX_HUMAN^Q:209-1867,H:47-616^37.031%ID^E:3e-110^RecName: Full	Neuroligin-4, X-linked	NLGNX_HUMAN^NLGNX_HUMAN^Q:21-573,H:47-616^37.031%ID^E:3.33e-112^RecName: Full=Neuroligin-4, X-linked;^Eukaryota; Metazoa; Chordata; Craniata; Vertebrata; Euteleostomi; Mammalia; Eutheria; Euarchontoglires; Primates; Haplorrhini; Catarrhini; Hominidae; Homo	tr|A0A2B4R740|A0A2B4R740_STYPI^tr|A0A2B4R740|A0A2B4R740_STYPI^Q:710-18,H:85-315^74.459%ID^E:1.85e-135^.^.	.	COG2272^Carboxylesterase	KEGG:hsa:57502`KO:K07378	GO:0098985^cellular_component^asymmetric, glutamatergic, excitatory synapse`GO:0030054^cellular_component^cell junction`GO:0009986^cellular_component^cell surface`GO:0030425^cellular_component^dendrite`GO:0060076^cellular_component^excitatory synapse`GO:0016021^cellular_component^integral component of membrane`GO:0005887^cellular_component^integral component of plasma membrane`GO:0005886^cellular…	GO:0098985^cellular_component^asymmetric, glutamatergic, excitatory synapse`GO:0030054^cellular_component^cell junction`GO:0009986^cellular_component^cell surface`GO:0030425^cellular_component^dendrite`GO:0060076^cellular_component^excitatory synapse`GO:0016021^cellular_component^integral component of membrane`GO:0005887^cellular_component^integral component of plasma membrane`GO:0005886^cellular…	GO:0030054;GO:0009986;GO:0030425;GO:0060076;GO:0016021;GO:0016021;GO:0005887;GO:0005886;GO:0098839;GO:0098793;GO:0089717;GO:0098983;GO:0045202;GO:0050839;GO:0031404;GO:0042043;GO:0042803;GO:0097110;GO:0038023;GO:0030534;GO:0003360;GO:0045216;GO:0021549;GO:0007612;GO:0050804;GO:0090394;GO:0007158;GO:0030182;GO:0035265;GO:0097104;GO:0099054;GO:0097105;GO:0035176;GO:0050808;GO:0048488;GO:0071625	N	+	FALSE	8.57143	1.0084	4.53782	4.20168	6.05042	5.71429	2.35294	3.02521	4.36975	8.23529	3.52941	3.69748	7.39496	2.18487	5.04202	10.084	6.21849	7.73109	2.01681	4.03361	100	8.7395	12.1008	SP(Sec/SPI)	0.970173	0.029827	CS pos: 19-20. TDA-AI. Pr: 0.9297
>TRINITY_DN5867_c0_g3_i1.p1 TRINITY_DN5867_c0_g3~~TRINITY_DN5867_c0_g3_i1.p1 ORF type:3prime_partial len:290 (+),score=22.11 TRINITY_DN5867_c0_g3_i1:105-971(+)	20.04	660.7	14	8	1	20.76	289	TRINITY_DN5867_c0_g3_i1.p1	TRINITY_DN5867_c0_g3_i1	no blast hit	no blast hit	.	.	.	.	.	.	.		N	FALSE	+	3.80623	6.22837	8.65052	6.57439	1.03806	3.11419	2.07612	2.07612	5.88235	4.49827	1.38408	3.11419	17.9931	3.11419	3.80623	9.68858	3.46021	5.88235	1.03806	6.57439	100	15.2249	8.65052
>TRINITY_DN6024_c0_g1_i2.p1 TRINITY_DN6024_c0_g1~~TRINITY_DN6024_c0_g1_i2.p1 ORF type:internal len:1084 (-),score=228.42 TRINITY_DN6024_c0_g1_i2:1-3249(-)	42.59	905.9	9	9	6	8.86	1083	TRINITY_DN6024_c0_g1_i2.p1	TRINITY_DN6024_c0_g1_i2	COA_ACRMI^COA_ACRMI^Q:843-100,H:490-738^37.121%ID^E:1.32e-25^RecName: Full	Collagen alpha chain	CO1A2_RAT^CO1A2_RAT^Q:4-1082,H:160-1252^40.984%ID^E:1.85e-118^RecName: Full=Collagen alpha-2(I) chain;^Eukaryota; Metazoa; Chordata; Craniata; Vertebrata; Euteleostomi; Mammalia; Eutheria; Euarchontoglires; Glires; Rodentia; Myomorpha; Muroidea; Muridae; Murinae; Rattus	.	.	ENOG410ZZWR^collagen, type	KEGG:rno:84352`KO:K06236	GO:0005581^cellular_component^collagen trimer`GO:0005576^cellular_component^extracellular region`GO:0005201^molecular_function^extracellular matrix structural constituent	GO:0005581^cellular_component^collagen trimer`GO:0005584^cellular_component^collagen type I trimer`GO:0031012^cellular_component^extracellular matrix`GO:0005576^cellular_component^extracellular region`GO:0005615^cellular_component^extracellular space`GO:0005201^molecular_function^extracellular matrix structural constituent`GO:0042802^molecular_function^identical protein binding`GO:0046872^molecul…	GO:0005584;GO:0031012;GO:0005576;GO:0005615;GO:0005201;GO:0005201;GO:0042802;GO:0046872;GO:0048407;GO:0002020;GO:0030674;GO:0046332;GO:0001568;GO:0030282;GO:0071230;GO:0071310;GO:0071300;GO:0097067;GO:0030199;GO:0032963;GO:0085029;GO:0030198;GO:0070208;GO:0008217;GO:0071873;GO:0007266;GO:0001501;GO:0043589;GO:0007179;	N	FALSE	FALSE	5.26316	0.369344	4.43213	5.54017	1.10803	30.5633	0.277008	1.29271	4.43213	2.77008	1.38504	2.95476	15.0508	4.70914	7.75623	4.3398	3.04709	3.13943	0.184672	1.38504	100	9.9723	2.67775
>TRINITY_DN6024_c1_g1_i3.p1 TRINITY_DN6024_c1_g1~~TRINITY_DN6024_c1_g1_i3.p1 ORF type:complete len:1453 (-),score=334.00 TRINITY_DN6024_c1_g1_i3:270-4628(-)	46.06	792	30	16	12	11.09	1452	TRINITY_DN6024_c1_g1_i3.p1	TRINITY_DN6024_c1_g1_i3	COA_ACRMI^COA_ACRMI^Q:1442-279,H:489-883^39.858%ID^E:2.93e-62^RecName: Full	Collagen alpha chain	CO1A2_LITCT^CO1A2_LITCT^Q:199-1450,H:109-1354^41.673%ID^E:1.3e-142^RecName: Full=Collagen alpha-2(I) chain;^Eukaryota; Metazoa; Chordata; Craniata; Vertebrata; Euteleostomi; Amphibia; Batrachia; Anura; Neobatrachia; Ranoidea; Ranidae; Rana; Aquarana	.	.	.	.	GO:0005581^cellular_component^collagen trimer`GO:0005576^cellular_component^extracellular region`GO:0005201^molecular_function^extracellular matrix structural constituent	GO:0005581^cellular_component^collagen trimer`GO:0005576^cellular_component^extracellular region`GO:0005201^molecular_function^extracellular matrix structural constituent`GO:0046872^molecular_function^metal ion binding	GO:0005576;GO:0005201;GO:0046872;	N	+	FALSE	6.88705	1.1708	4.95868	5.16529	1.30854	27.0661	0.550964	1.92837	4.13223	3.85675	0.757576	2.61708	14.3939	5.02755	5.78512	5.16529	4.26997	3.58127	0.413223	0.964187	100	10.124	2.68595	SP(Sec/SPI)	0.999748	0.000252	CS pos: 21-22. VAA-QA. Pr: 0.5211
>TRINITY_DN60847_c0_g1_i2.p1 TRINITY_DN60847_c0_g1~~TRINITY_DN60847_c0_g1_i2.p1 ORF type:complete len:1106 (-),score=257.47 TRINITY_DN60847_c0_g1_i2:226-3543(-)	111.31	822.7	36	22	21	19.82	1105	TRINITY_DN60847_c0_g1_i2.p1	TRINITY_DN60847_c0_g1_i2	no blast hit	no blast hit	CO1A2_RAT^CO1A2_RAT^Q:80-1084,H:81-1091^42.884%ID^E:8.92e-85^RecName: Full=Collagen alpha-2(I) chain;^Eukaryota; Metazoa; Chordata; Craniata; Vertebrata; Euteleostomi; Mammalia; Eutheria; Euarchontoglires; Glires; Rodentia; Myomorpha; Muroidea; Muridae; Murinae; Rattus	.	.	ENOG410ZZWR^collagen, type	KEGG:rno:84352`KO:K06236	.	GO:0005581^cellular_component^collagen trimer`GO:0005584^cellular_component^collagen type I trimer`GO:0031012^cellular_component^extracellular matrix`GO:0005576^cellular_component^extracellular region`GO:0005615^cellular_component^extracellular space`GO:0005201^molecular_function^extracellular matrix structural constituent`GO:0042802^molecular_function^identical protein binding`GO:0046872^molecul…	GO:0005584;GO:0031012;GO:0005576;GO:0005615;GO:0005201;GO:0005201;GO:0042802;GO:0046872;GO:0048407;GO:0002020;GO:0030674;GO:0046332;GO:0001568;GO:0030282;GO:0071230;GO:0071310;GO:0071300;GO:0097067;GO:0030199;GO:0032963;GO:0085029;GO:0030198;GO:0070208;GO:0008217;GO:0071873;GO:0007266;GO:0001501;GO:0043589;GO:0007179;	N	+	FALSE	9.14027	0.271493	4.88688	3.61991	0.633484	32.9412	0	1.17647	4.1629	2.53394	0.723982	2.44344	15.9276	4.97738	5.33937	4.70588	3.16742	2.80543	0.180995	0.361991	100	8.50679	1.17647	OTHER	0.009855	0.990145
>TRINITY_DN64006_c0_g1_i1.p1 TRINITY_DN64006_c0_g1~~TRINITY_DN64006_c0_g1_i1.p1 ORF type:internal len:163 (+),score=29.83 TRINITY_DN64006_c0_g1_i1:1-486(+)	13.74	562.5	12	5	2	27.78	162	TRINITY_DN64006_c0_g1_i1.p1	TRINITY_DN64006_c0_g1_i1	MRC1_HUMAN^MRC1_HUMAN^Q:16-486,H:856-1025^26.519%ID^E:2.06e-12^RecName: Full	Macrophage mannose receptor 1	MRC1_HUMAN^MRC1_HUMAN^Q:6-162,H:856-1025^26.519%ID^E:1.86e-12^RecName: Full=Macrophage mannose receptor 1;^Eukaryota; Metazoa; Chordata; Craniata; Vertebrata; Euteleostomi; Mammalia; Eutheria; Euarchontoglires; Primates; Haplorrhini; Catarrhini; Hominidae; Homo	tr|A0A3M6TE79|A0A3M6TE79_9CNID^tr|A0A3M6TE79|A0A3M6TE79_9CNID^Q:11-241,H:1068-1144^48.052%ID^E:2.93e-15^.^.	.	ENOG410XRS3^mannose receptor, C type 1	KEGG:hsa:4360`KO:K06560	GO:0009986^cellular_component^cell surface`GO:0010008^cellular_component^endosome membrane`GO:0005887^cellular_component^integral component of plasma membrane`GO:0005886^cellular_component^plasma membrane`GO:0038024^molecular_function^cargo receptor activity`GO:0005537^molecular_function^mannose binding`GO:0004888^molecular_function^transmembrane signaling receptor activity`GO:0001618^molecular_f…	GO:0009986^cellular_component^cell surface`GO:0010008^cellular_component^endosome membrane`GO:0005887^cellular_component^integral component of plasma membrane`GO:0005886^cellular_component^plasma membrane`GO:0038024^molecular_function^cargo receptor activity`GO:0005537^molecular_function^mannose binding`GO:0004888^molecular_function^transmembrane signaling receptor activity`GO:0001618^molecular_f…	GO:0010008;GO:0005887;GO:0005886;GO:0038024;GO:0005537;GO:0005537;GO:0004888;GO:0001618;GO:0071346;GO:0071353;GO:0071222;GO:0006898	N	FALSE	FALSE	6.79012	4.93827	10.4938	9.25926	3.08642	10.4938	0.617284	3.08642	4.93827	5.55556	1.85185	6.17284	3.7037	3.7037	5.55556	5.55556	1.85185	2.46914	4.93827	4.93827	100	19.7531	12.963
>TRINITY_DN68189_c0_g1_i1.p1 TRINITY_DN68189_c0_g1~~TRINITY_DN68189_c0_g1_i1.p1 ORF type:complete len:265 (-),score=62.34 TRINITY_DN68189_c0_g1_i1:384-1124(-)	1.78	390.4	3	2	0	6.91	246	TRINITY_DN68189_c0_g1_i1.p1	TRINITY_DN68189_c0_g1_i1	1433_HELAN^1433_HELAN^Q:1106-399,H:10-240^51.695%ID^E:7.43e-67^RecName: Full	14-3-3-like protein	1433G_CHICK^1433G_CHICK^Q:25-260,H:6-235^57.322%ID^E:2.39e-77^RecName: Full=14-3-3 protein gamma;^Eukaryota; Metazoa; Chordata; Craniata; Vertebrata; Euteleostomi; Archelosauria; Archosauria; Dinosauria; Saurischia; Theropoda; Coelurosauria; Aves; Neognathae; Galloanserae; Galliformes; Phasianidae; Phasianinae; Gallus	.	.	COG5040^Tyrosine 3-monooxygenase tryptophan 5-monooxygenase activation protein	KEGG:gga:427820`KO:K16198	GO:0019904^molecular_function^protein domain specific binding	GO:0005737^cellular_component^cytoplasm`GO:0019904^molecular_function^protein domain specific binding	GO:0019904;	N	+	FALSE	8.53659	2.43902	6.09756	13.4146	1.62602	2.84553	0.406504	4.06504	10.5691	10.1626	2.43902	5.69106	2.03252	5.69106	2.84553	7.31707	2.43902	6.09756	0.813008	4.47154	100	19.5122	6.91057	OTHER	0.000552	0.999448
>TRINITY_DN70742_c0_g1_i3.p1 TRINITY_DN70742_c0_g1~~TRINITY_DN70742_c0_g1_i3.p1 ORF type:internal len:116 (+),score=23.47 TRINITY_DN70742_c0_g1_i3:1-345(+)	17.56	863.3	6	4	1	23.48	115	TRINITY_DN70742_c0_g1_i3.p1	TRINITY_DN70742_c0_g1_i3	no blast hit	no blast hit	.	.	.	.	.	.	.		N	FALSE	FALSE	11.3043	6.08696	5.21739	5.21739	6.08696	9.56522	1.73913	2.6087	10.4348	5.21739	1.73913	1.73913	6.08696	6.95652	1.73913	8.69565	2.6087	6.08696	0	0.869565	100	10.4348	6.95652
>TRINITY_DN7289_c0_g1_i5.p1 TRINITY_DN7289_c0_g1~~TRINITY_DN7289_c0_g1_i5.p1 ORF type:complete len:2147 (-),score=895.73 TRINITY_DN7289_c0_g1_i5:388-6828(-)	24.26	651.5	13	10	0	4.24	2146	TRINITY_DN7289_c0_g1_i5.p1	TRINITY_DN7289_c0_g1_i5	CROCC_HUMAN^CROCC_HUMAN^Q:6777-766,H:15-1992^40.226%ID^E:0^RecName: Full	Rootletin	CROCC_HUMAN^CROCC_HUMAN^Q:18-2038,H:15-2009^40.34%ID^E:0^RecName: Full=Rootletin;^Eukaryota; Metazoa; Chordata; Craniata; Vertebrata; Euteleostomi; Mammalia; Eutheria; Euarchontoglires; Primates; Haplorrhini; Catarrhini; Hominidae; Homo	.	.	ENOG410XPG3^Ciliary rootlet coiled-coil, rootletin	KEGG:hsa:9696`KO:K16469	GO:0015629^cellular_component^actin cytoskeleton`GO:0005814^cellular_component^centriole`GO:0005813^cellular_component^centrosome`GO:0035253^cellular_component^ciliary rootlet`GO:0005829^cellular_component^cytosol`GO:0070062^cellular_component^extracellular exosome`GO:0001917^cellular_component^photoreceptor inner segment`GO:0005886^cellular_component^plasma membrane`GO:0003779^molecular_function…	GO:0015629^cellular_component^actin cytoskeleton`GO:0005814^cellular_component^centriole`GO:0005813^cellular_component^centrosome`GO:0035253^cellular_component^ciliary rootlet`GO:0005829^cellular_component^cytosol`GO:0070062^cellular_component^extracellular exosome`GO:0001917^cellular_component^photoreceptor inner segment`GO:0005886^cellular_component^plasma membrane`GO:0003779^molecular_function…	GO:0005814;GO:0005813;GO:0035253;GO:0005829;GO:0070062;GO:0070062;GO:0001917;GO:0005886;GO:0003779;GO:0019894;GO:0005200;GO:0005198;GO:0010457;GO:0007098;GO:0032053;GO:0010669;GO:0051656;GO:0045494;GO:0045724;GO:1903566;GO:0008104;GO:0033365	N	+	FALSE	8.15471	0.139795	5.4986	14.4455	0.745573	3.44828	1.49115	2.51631	8.99348	10.8108	2.7027	4.56664	1.58434	7.59553	9.22647	7.82852	4.61323	4.75303	0.186393	0.698975	100	19.9441	1.63094	OTHER	0.000739	0.999261
>TRINITY_DN7368_c0_g1_i17.p1 TRINITY_DN7368_c0_g1~~TRINITY_DN7368_c0_g1_i17.p1 ORF type:5prime_partial len:303 (-),score=65.47 TRINITY_DN7368_c0_g1_i17:301-1209(-)	10.64	778	13	1	0	4.3	302	TRINITY_DN7368_c0_g1_i17.p1	TRINITY_DN7368_c0_g1_i17	no blast hit	no blast hit	.	.	.	.	.	.	.		N	FALSE	FALSE	11.9205	0	7.28477	7.61589	0.662252	13.9073	8.9404	1.65563	2.31788	9.93377	3.31126	0.993377	5.62914	1.3245	3.97351	4.63576	5.62914	5.96026	1.3245	2.98013	100	14.9007	4.96689
>TRINITY_DN7696_c0_g1_i3.p1 TRINITY_DN7696_c0_g1~~TRINITY_DN7696_c0_g1_i3.p1 ORF type:complete len:372 (+),score=60.26 TRINITY_DN7696_c0_g1_i3:141-1256(+)	12.22	602.1	9	6	2	14.56	371	TRINITY_DN7696_c0_g1_i3.p1	TRINITY_DN7696_c0_g1_i3	ZPP_ACRMI^ZPP_ACRMI^Q:249-1223,H:65-394^27.353%ID^E:6.83e-35^RecName: Full	ZP domain-containing protein {ECO:0000303|PubMed:23765379}	ZPP_ACRMI^ZPP_ACRMI^Q:37-361,H:65-394^27.353%ID^E:8.7e-36^RecName: Full=ZP domain-containing protein {ECO:0000303|PubMed:23765379};^Eukaryota; Metazoa; Cnidaria; Anthozoa; Hexacorallia; Scleractinia; Astrocoeniina; Acroporidae; Acropora	tr|A0A2B4SPU8|A0A2B4SPU8_STYPI^tr|A0A2B4SPU8|A0A2B4SPU8_STYPI^Q:1562-432,H:1-377^88.594%ID^E:0^.^.	ExpAA=22.81^PredHel=1^Topology=o332-354i	.	.	GO:0016021^cellular_component^integral component of membrane	GO:0016021^cellular_component^integral component of membrane		N	+	FALSE	7.00809	3.2345	7.54717	4.04313	5.12129	5.92992	2.42588	4.85175	6.19946	7.81671	2.15633	4.04313	5.12129	3.77358	4.58221	8.3558	5.92992	7.00809	0.539084	4.31267	100	11.5903	9.97305	SP(Sec/SPI)	0.998479	0.001521	CS pos: 19-20. VNG-QD. Pr: 0.9721
>TRINITY_DN7908_c0_g1_i1.p1 TRINITY_DN7908_c0_g1~~TRINITY_DN7908_c0_g1_i1.p1 ORF type:3prime_partial len:324 (-),score=61.97 TRINITY_DN7908_c0_g1_i1:1-969(-)	1.69	480.7	6	3	2	5.57	323	TRINITY_DN7908_c0_g1_i1.p1	TRINITY_DN7908_c0_g1_i1	no blast hit	no blast hit	.	.	.	.	.	.	.		N	FALSE	+	5.88235	2.47678	8.04954	7.12074	5.26316	5.57276	2.47678	4.33437	6.19195	7.73994	1.85759	4.02477	4.64396	3.40557	7.73994	8.04954	5.26316	5.26316	0	4.64396	100	15.1703	9.90712
>TRINITY_DN8112_c0_g1_i20.p1 TRINITY_DN8112_c0_g1~~TRINITY_DN8112_c0_g1_i20.p1 ORF type:5prime_partial len:101 (+),score=26.09 TRINITY_DN8112_c0_g1_i20:1-303(+)	8.3	579.9	10	5	1	47	100	TRINITY_DN8112_c0_g1_i20.p1	TRINITY_DN8112_c0_g1_i20	no blast hit	no blast hit	.	.	.	.	.	.	.		N	FALSE	FALSE	8	6	3	4	5	9	3	4	17	3	5	3	8	4	2	3	2	8	1	2	100	7	8
>TRINITY_DN8257_c0_g1_i1.p1 TRINITY_DN8257_c0_g1~~TRINITY_DN8257_c0_g1_i1.p1 ORF type:complete len:136 (+),score=24.00 TRINITY_DN8257_c0_g1_i1:769-1176(+)	12.35	598.2	6	4	1	40.74	135	TRINITY_DN8257_c0_g1_i1.p1	TRINITY_DN8257_c0_g1_i1	no blast hit	no blast hit	.	tr|A0A2B4SU00|A0A2B4SU00_STYPI^tr|A0A2B4SU00|A0A2B4SU00_STYPI^Q:2000-639,H:1-454^94.493%ID^E:0^.^.	.	.	.	.	.		N	+	FALSE	9.62963	0.740741	2.22222	5.92593	3.7037	8.14815	2.96296	4.44444	4.44444	5.92593	2.96296	7.40741	7.40741	3.7037	2.96296	6.66667	5.92593	7.40741	1.48148	5.92593	100	8.14815	11.1111	OTHER	0.003155	0.996845
>TRINITY_DN827_c0_g1_i15.p1 TRINITY_DN827_c0_g1~~TRINITY_DN827_c0_g1_i15.p1 ORF type:complete len:1135 (-),score=186.10 TRINITY_DN827_c0_g1_i15:551-3577(-)	12.52	469.9	4	4	1	5.16	1008	TRINITY_DN827_c0_g1_i15.p1	TRINITY_DN827_c0_g1_i15	USOM7_ACRMI^USOM7_ACRMI^Q:2080-1097,H:95-421^33.036%ID^E:1.38e-42^RecName: Full	Uncharacterized skeletal organic matrix protein 7 {ECO:0000303|PubMed:23765379}	USOM7_ACRMI^USOM7_ACRMI^Q:626-953,H:95-421^33.036%ID^E:4.23e-43^RecName: Full=Uncharacterized skeletal organic matrix protein 7 {ECO:0000303|PubMed:23765379};^Eukaryota; Metazoa; Cnidaria; Anthozoa; Hexacorallia; Scleractinia; Astrocoeniina; Acroporidae; Acropora	.	.	.	.	GO:0005576^cellular_component^extracellular region	GO:0005576^cellular_component^extracellular region		N	+	FALSE	6.44841	2.38095	6.94444	4.96032	4.46429	8.82937	1.5873	5.75397	4.36508	6.05159	1.19048	5.35714	5.35714	2.28175	5.55556	7.34127	6.44841	9.22619	1.38889	4.06746	100	11.9048	9.92063	OTHER	0.003105	0.996895
>TRINITY_DN8297_c0_g1_i1.p1 TRINITY_DN8297_c0_g1~~TRINITY_DN8297_c0_g1_i1.p1 ORF type:5prime_partial len:889 (-),score=86.40 TRINITY_DN8297_c0_g1_i1:98-2764(-)	7.34	554.3	2	2	1	2.93	888	TRINITY_DN8297_c0_g1_i1.p1	TRINITY_DN8297_c0_g1_i1	SVEP1_RAT^SVEP1_RAT^Q:2308-848,H:277-788^26.616%ID^E:8.8e-40^RecName: Full	Sushi, von Willebrand factor type A, EGF and pentraxin domain-containing protein 1	SVEP1_RAT^SVEP1_RAT^Q:153-639,H:277-788^26.527%ID^E:5.37e-40^RecName: Full=Sushi, von Willebrand factor type A, EGF and pentraxin domain-containing protein 1;^Eukaryota; Metazoa; Chordata; Craniata; Vertebrata; Euteleostomi; Mammalia; Eutheria; Euarchontoglires; Glires; Rodentia; Myomorpha; Muroidea; Muridae; Murinae; Rattus	.	.	ENOG410XPJ1^c-type lectin domain family	.	GO:0005737^cellular_component^cytoplasm`GO:0005576^cellular_component^extracellular region`GO:0016020^cellular_component^membrane`GO:0005509^molecular_function^calcium ion binding`GO:0003682^molecular_function^chromatin binding`GO:0007155^biological_process^cell adhesion	GO:0005737^cellular_component^cytoplasm`GO:0005576^cellular_component^extracellular region`GO:0016020^cellular_component^membrane`GO:0005509^molecular_function^calcium ion binding`GO:0003682^molecular_function^chromatin binding`GO:0007155^biological_process^cell adhesion	GO:0005576;GO:0016020;GO:0005509;GO:0003682;GO:0007155;GO:0007155	N	FALSE	FALSE	5.96847	7.88288	5.85586	4.95495	2.81532	9.68468	1.23874	3.26577	6.19369	3.04054	0.900901	5.40541	6.08108	4.95495	2.47748	8.44595	8.44595	6.64414	1.68919	4.05405	100	10.8108	8.55856
>TRINITY_DN878_c0_g2_i3.p1 TRINITY_DN878_c0_g2~~TRINITY_DN878_c0_g2_i3.p1 ORF type:5prime_partial len:349 (+),score=40.97 TRINITY_DN878_c0_g2_i3:3-1049(+)	1.05	352.8	2	2	1	4.89	348	TRINITY_DN878_c0_g2_i3.p1	TRINITY_DN878_c0_g2_i3	no blast hit	no blast hit	.	.	.	.	.	.	.		N	FALSE	FALSE	7.18391	10.9195	7.18391	7.75862	2.58621	6.03448	1.72414	2.29885	7.75862	5.45977	2.01149	4.02299	4.02299	3.44828	8.04598	7.47126	4.31034	3.16092	0.862069	3.73563	100	14.9425	7.18391
>TRINITY_DN934_c0_g1_i4.p1 TRINITY_DN934_c0_g1~~TRINITY_DN934_c0_g1_i4.p1 ORF type:complete len:210 (-),score=44.27 TRINITY_DN934_c0_g1_i4:96-725(-)	1.53	331	2	2	0	8.13	209	TRINITY_DN934_c0_g1_i4.p1	TRINITY_DN934_c0_g1_i4	GST8_CAEEL^GST8_CAEEL^Q:725-102,H:1-205^37.736%ID^E:1.96e-35^RecName: Full	Probable glutathione S-transferase 8	GST8_CAEEL^GST8_CAEEL^Q:1-208,H:1-205^37.736%ID^E:3.21e-36^RecName: Full=Probable glutathione S-transferase 8;^Eukaryota; Metazoa; Ecdysozoa; Nematoda; Chromadorea; Rhabditida; Rhabditina; Rhabditomorpha; Rhabditoidea; Rhabditidae; Peloderinae; Caenorhabditis	tr|A0A2B4SAY8|A0A2B4SAY8_STYPI^tr|A0A2B4SAY8|A0A2B4SAY8_STYPI^Q:121-642,H:1-174^79.885%ID^E:4.52e-99^.^.	.	ENOG4111VAU^glutathione Stransferase	KEGG:cel:CELE_F11G11.1`KO:K00799	GO:0004364^molecular_function^glutathione transferase activity`GO:0006749^biological_process^glutathione metabolic process	GO:0004364^molecular_function^glutathione transferase activity`GO:0006749^biological_process^glutathione metabolic process	GO:0006749;	N	+	FALSE	10.5263	1.43541	5.26316	7.17703	8.13397	5.74163	0.956938	4.30622	9.56938	8.13397	5.26316	2.87081	5.26316	3.34928	3.34928	3.82775	3.82775	5.74163	1.91388	3.34928	100	12.4402	13.3971	OTHER	0.000979	0.999021
>TRINITY_DN9573_c0_g1_i13.p1 TRINITY_DN9573_c0_g1~~TRINITY_DN9573_c0_g1_i13.p1 ORF type:complete len:271 (-),score=52.32 TRINITY_DN9573_c0_g1_i13:1768-2580(-)	7.26	597.3	5	3	0	12.22	270	TRINITY_DN9573_c0_g1_i13.p1	TRINITY_DN9573_c0_g1_i13	PDCD5_BOVIN^PDCD5_BOVIN^Q:68-409,H:18-125^59.13%ID^E:1.31e-34^RecName: Full	Programmed cell death protein 5	GAPR1_HUMAN^GAPR1_HUMAN^Q:111-265,H:9-149^33.544%ID^E:2.56e-19^RecName: Full=Golgi-associated plant pathogenesis-related protein 1;^Eukaryota; Metazoa; Chordata; Craniata; Vertebrata; Euteleostomi; Mammalia; Eutheria; Euarchontoglires; Primates; Haplorrhini; Catarrhini; Hominidae; Homo	.	.	COG2340^Scp-like extracellular	KEGG:hsa:152007	GO:0005829^cellular_component^cytosol`GO:0005634^cellular_component^nucleus`GO:0010698^molecular_function^acetyltransferase activator activity`GO:0048487^molecular_function^beta-tubulin binding`GO:0003677^molecular_function^DNA binding`GO:0008201^molecular_function^heparin binding`GO:0006915^biological_process^apoptotic process`GO:0071560^biological_process^cellular response to transforming growt…	GO:0070062^cellular_component^extracellular exosome`GO:0005615^cellular_component^extracellular space`GO:0000139^cellular_component^Golgi membrane`GO:0042803^molecular_function^protein homodimerization activity`GO:0010634^biological_process^positive regulation of epithelial cell migration`GO:0010718^biological_process^positive regulation of epithelial to mesenchymal transition`GO:0070374^biologic…	GO:0005615;GO:0000139;GO:0042803;GO:0010634;GO:0010718;GO:0010718;GO:0070374;	N	+	FALSE	8.51852	2.96296	5.18519	9.25926	2.59259	5.18519	1.85185	2.96296	8.14815	6.66667	2.59259	5.18519	9.62963	4.81481	4.81481	2.22222	8.88889	3.33333	2.59259	2.59259	100	14.4444	7.77778	OTHER	0.007325	0.992675
>TRINITY_DN9588_c0_g1_i1.p1 TRINITY_DN9588_c0_g1~~TRINITY_DN9588_c0_g1_i1.p1 ORF type:complete len:412 (-),score=31.04 TRINITY_DN9588_c0_g1_i1:443-1678(-)	10.71	590.8	4	3	0	7.79	411	TRINITY_DN9588_c0_g1_i1.p1	TRINITY_DN9588_c0_g1_i1	ENTP1_MOUSE^ENTP1_MOUSE^Q:1603-473,H:46-453^31.529%ID^E:3.05e-46^RecName: Full	Ectonucleoside triphosphate diphosphohydrolase 1	ENTP1_MOUSE^ENTP1_MOUSE^Q:26-405,H:46-456^31.542%ID^E:2.08e-48^RecName: Full=Ectonucleoside triphosphate diphosphohydrolase 1;^Eukaryota; Metazoa; Chordata; Craniata; Vertebrata; Euteleostomi; Mammalia; Eutheria; Euarchontoglires; Glires; Rodentia; Myomorpha; Muroidea; Muridae; Murinae; Mus; Mus	tr|A0A3M6TIX7|A0A3M6TIX7_9CNID^tr|A0A3M6TIX7|A0A3M6TIX7_9CNID^Q:535-8,H:60-235^39.326%ID^E:1.34e-37^.^.	ExpAA=18.69^PredHel=1^Topology=i7-29o	COG5371^Ectonucleoside triphosphate diphosphohydrolase	KEGG:mmu:12495`KO:K01510	GO:0005604^cellular_component^basement membrane`GO:0016323^cellular_component^basolateral plasma membrane`GO:0009986^cellular_component^cell surface`GO:0005615^cellular_component^extracellular space`GO:0016021^cellular_component^integral component of membrane`GO:0043005^cellular_component^neuron projection`GO:0043025^cellular_component^neuronal cell body`GO:0014069^cellular_component^postsynaptic…	GO:0005604^cellular_component^basement membrane`GO:0016323^cellular_component^basolateral plasma membrane`GO:0009986^cellular_component^cell surface`GO:0005615^cellular_component^extracellular space`GO:0016021^cellular_component^integral component of membrane`GO:0043005^cellular_component^neuron projection`GO:0043025^cellular_component^neuronal cell body`GO:0014069^cellular_component^postsynaptic…	GO:0016323;GO:0009986;GO:0005615;GO:0016021;GO:0043005;GO:0043005;GO:0043025;GO:0014069;GO:0097060;GO:0008021;GO:0102490;GO:0043262;GO:0005524;GO:0016887;GO:0102485;GO:0102486;GO:0102491;GO:0102488;GO:0102487;GO:0102489;GO:0042802;GO:0017110;GO:0017111;GO:0007186;GO:2001170;GO:0033602;GO:0030168;GO:0009181	N	+	FALSE	7.54258	2.18978	7.54258	7.05596	5.10949	6.81265	2.91971	6.56934	5.59611	9.48905	1.21655	3.64964	4.13625	3.40633	3.89294	6.32603	4.86618	5.83942	0.729927	5.10949	100	14.5985	10.9489	SP(Sec/SPI)	0.843662	0.156338	CS pos: 25-26. ASA-NI. Pr: 0.6092
>TRINITY_DN980_c1_g1_i3.p1 TRINITY_DN980_c1_g1~~TRINITY_DN980_c1_g1_i3.p1 ORF type:5prime_partial len:1643 (-),score=452.05 TRINITY_DN980_c1_g1_i3:180-5108(-)	31.67	735.9	19	11	8	6.94	1642	TRINITY_DN980_c1_g1_i3.p1	TRINITY_DN980_c1_g1_i3	CO4A1_BOVIN^CO4A1_BOVIN^Q:929-267,H:1445-1667^67.265%ID^E:4.12e-105^RecName: Full	Collagen alpha-1(IV) chain	CO4A1_DROME^CO4A1_DROME^Q:2-1614,H:89-1776^41.723%ID^E:0^RecName: Full=Collagen alpha-1(IV) chain {ECO:0000303|PubMed:3142875};^Eukaryota; Metazoa; Ecdysozoa; Arthropoda; Hexapoda; Insecta; Pterygota; Neoptera; Holometabola; Diptera; Brachycera; Muscomorpha; Ephydroidea; Drosophilidae; Drosophila; Sophophora	.	.	ENOG410XNMM^collagen, type	KEGG:dme:Dmel_CG4145`KO:K06237	GO:0005587^cellular_component^collagen type IV trimer`GO:0031012^cellular_component^extracellular matrix`GO:0005615^cellular_component^extracellular space`GO:0005201^molecular_function^extracellular matrix structural constituent`GO:0030020^molecular_function^extracellular matrix structural constituent conferring tensile strength`GO:0048407^molecular_function^platelet-derived growth factor binding…	GO:0005604^cellular_component^basement membrane`GO:0005587^cellular_component^collagen type IV trimer`GO:0031012^cellular_component^extracellular matrix`GO:0005615^cellular_component^extracellular space`GO:0005201^molecular_function^extracellular matrix structural constituent`GO:0071711^biological_process^basement membrane organization`GO:0055013^biological_process^cardiac muscle cell development…	GO:0005587;GO:0031012;GO:0005615;GO:0005201;GO:0071711;GO:0071711;GO:0055013;GO:0038063;GO:0007391;GO:0030198;GO:0060729;GO:0035848;GO:0048621;	N	FALSE	FALSE	4.93301	0.91352	6.94275	6.27284	1.27893	29.2935	0.548112	2.25335	6.63825	2.49695	0.91352	2.98417	13.581	4.6894	4.3849	4.26309	3.95859	2.67966	0.365408	0.609013	100	13.2156	2.25335
>TRINITY_DN99_c0_g1_i2.p1 TRINITY_DN99_c0_g1~~TRINITY_DN99_c0_g1_i2.p1 ORF type:5prime_partial len:1065 (-),score=199.08 TRINITY_DN99_c0_g1_i2:455-3649(-)	157.25	766.3	73	38	9	31.77	1064	TRINITY_DN99_c0_g1_i2.p1	TRINITY_DN99_c0_g1_i2	HMCN1_HUMAN^HMCN1_HUMAN^Q:3622-1673,H:3261-3901^29.582%ID^E:6.24e-61^RecName: Full	Hemicentin-1	HMCN1_HUMAN^HMCN1_HUMAN^Q:10-659,H:3261-3901^29.582%ID^E:8.94e-62^RecName: Full=Hemicentin-1;^Eukaryota; Metazoa; Chordata; Craniata; Vertebrata; Euteleostomi; Mammalia; Eutheria; Euarchontoglires; Primates; Haplorrhini; Catarrhini; Hominidae; Homo	.	.	ENOG410ZN3C^von Willebrand factor A domain containing 7	KEGG:hsa:83872`KO:K17341	GO:0005604^cellular_component^basement membrane`GO:0005938^cellular_component^cell cortex`GO:0032154^cellular_component^cleavage furrow`GO:0062023^cellular_component^collagen-containing extracellular matrix`GO:0070062^cellular_component^extracellular exosome`GO:0005509^molecular_function^calcium ion binding`GO:0050839^molecular_function^cell adhesion molecule binding`GO:0005201^molecular_function…	GO:0005604^cellular_component^basement membrane`GO:0005938^cellular_component^cell cortex`GO:0032154^cellular_component^cleavage furrow`GO:0062023^cellular_component^collagen-containing extracellular matrix`GO:0070062^cellular_component^extracellular exosome`GO:0005509^molecular_function^calcium ion binding`GO:0050839^molecular_function^cell adhesion molecule binding`GO:0005201^molecular_function…	GO:0005938;GO:0032154;GO:0062023;GO:0070062;GO:0005509;GO:0005509;GO:0050839;GO:0005201;GO:0042803;GO:0038023;GO:0007049;GO:0051301;GO:0007157;GO:0007156;GO:0009617;GO:0007601	N	FALSE	FALSE	7.33083	4.32331	6.48496	5.35714	2.81955	7.80075	0.75188	6.39098	4.88722	4.51128	1.50376	4.69925	5.45113	4.9812	5.45113	6.10902	9.68045	9.49248	0.75188	1.2218	100	11.8421	4.79323
[truncated: 12 more columns]

## Sheet: Antipathes Cleaned Twice
	Proteomics								Annotation														Fraction	Completeness		Amino Acid Composition																							Signal Peptide
Description	|Log Prob|	Best score	# of spectra	# of unique peptides	# of mod peptides	Coverage %	# AA's in protein	Short_Name	transcript_id	sprot_Top_BLASTX_hit	Annotation	prot_id	sprot_Top_BLASTP_hit	Scleractinia.only_BLASTX	TmHMM	eggnog	Kegg	gene_ontology_BLASTX	gene_ontology_BLASTP	gene_ontology_BLASTP		Combined GO	Unique to twice cleaned fraction	Complete	Incomplete at C-terminus only	%Ala	%Cys	%Asp	%Glu	%Phe	%Gly	%His	%Ile	%Lys	%Leu	%Met	%Asn	%Pro	%Gln	%Arg	%Ser	%Thr	%Val	%Trp	%Tyr	Total%	%D+E	%WYF	Prediction
>TRINITY_DN100611_c0_g1_i1.p1 TRINITY_DN100611_c0_g1~~TRINITY_DN100611_c0_g1_i1.p1 ORF type:complete len:232 (-),score=47.53 TRINITY_DN100611_c0_g1_i1:113-763(-)	7.93	540.3	7	5	0	18.52	216	TRINITY_DN100611_c0_g1_i1.p1	TRINITY_DN100611_c0_g1_i1	GSTM4_HUMAN^GSTM4_HUMAN^Q:763-125,H:1-213^52.582%ID^E:1.14e-79^RecName: Full	Glutathione S-transferase Mu 4	TRINITY_DN100611_c0_g1_i1.p1	GSTM4_HUMAN^GSTM4_HUMAN^Q:1-215,H:1-215^52.093%ID^E:1.97e-80^RecName: Full=Glutathione S-transferase Mu 4;^Eukaryota; Metazoa; Chordata; Craniata; Vertebrata; Euteleostomi; Mammalia; Eutheria; Euarchontoglires; Primates; Haplorrhini; Catarrhini; Hominidae; Homo	tr|A0A3M6TQ19|A0A3M6TQ19_9CNID^tr|A0A3M6TQ19|A0A3M6TQ19_9CNID^Q:4-156,H:18-68^54.902%ID^E:1.21e-14^.^.	.	ENOG4110YU0^Glutathione S-transferase, mu	KEGG:hsa:2948`KO:K00799	GO:0005737^cellular_component^cytoplasm`GO:0005829^cellular_component^cytosol`GO:0045171^cellular_component^intercellular bridge`GO:0019899^molecular_function^enzyme binding`GO:0043295^molecular_function^glutathione binding`GO:0004364^molecular_function^glutathione transferase activity`GO:0042803^molecular_function^protein homodimerization activity`GO:1901687^biological_process^glutathione deriva…	GO:0005737^cellular_component^cytoplasm`GO:0005829^cellular_component^cytosol`GO:0045171^cellular_component^intercellular bridge`GO:0019899^molecular_function^enzyme binding`GO:0043295^molecular_function^glutathione binding`GO:0004364^molecular_function^glutathione transferase activity`GO:0042803^molecular_function^protein homodimerization activity`GO:1901687^biological_process^glutathione deriva…	GO:0005737^cellular_component^cytoplasm	GO:0005829^cellular_component^cytosol	GO:0045171;GO:0019899;GO:0043295;GO:0004364;GO:0042803;GO:1901687;GO:0006749;GO:0042759;GO:0018916;GO:0042178	Y	+	FALSE	7.40741	1.38889	8.33333	6.48148	6.94444	6.01852	2.31481	6.48148	9.25926	11.5741	1.85185	3.7037	3.7037	1.85185	4.62963	3.7037	4.16667	5.09259	0.925926	4.16667	100	14.8148	12.037	OTHER
>TRINITY_DN10136_c0_g2_i1.p1 TRINITY_DN10136_c0_g2~~TRINITY_DN10136_c0_g2_i1.p1 ORF type:internal len:115 (-),score=34.31 TRINITY_DN10136_c0_g2_i1:3-344(-)	3.59	425.5	4	3	2	17.54	114	TRINITY_DN10136_c0_g2_i1.p1	TRINITY_DN10136_c0_g2_i1	no blast hit	no blast hit	TRINITY_DN10136_c0_g2_i1.p1	.	.	.	.	.	.	.	.			Y	FALSE	FALSE	14.9123	0.877193	8.77193	6.14035	0	3.50877	1.75439	5.26316	4.38596	13.1579	3.50877	5.26316	0.877193	6.14035	6.14035	7.89474	5.26316	5.26316	0	0.877193	100	14.9123	0.877193
>TRINITY_DN10229_c0_g2_i2.p1 TRINITY_DN10229_c0_g2~~TRINITY_DN10229_c0_g2_i2.p1 ORF type:5prime_partial len:180 (+),score=22.20 TRINITY_DN10229_c0_g2_i2:2-541(+)	6.62	407.8	7	5	0	22.9	179	TRINITY_DN10229_c0_g2_i2.p1	TRINITY_DN10229_c0_g2_i2	SAP3_MACFA^SAP3_MACFA^Q:95-532,H:32-187^32.515%ID^E:5.83e-19^RecName: Full	Ganglioside GM2 activator	TRINITY_DN10229_c0_g2_i2.p1	SAP3_MACFA^SAP3_MACFA^Q:30-177,H:30-187^32.121%ID^E:2e-19^RecName: Full=Ganglioside GM2 activator;^Eukaryota; Metazoa; Chordata; Craniata; Vertebrata; Euteleostomi; Mammalia; Eutheria; Euarchontoglires; Primates; Haplorrhini; Catarrhini; Cercopithecidae; Cercopithecinae; Macaca	.	.	.	KEGG:mcf:102143555`KO:K12383	GO:0005764^cellular_component^lysosome`GO:0008047^molecular_function^enzyme activator activity`GO:0016787^molecular_function^hydrolase activity`GO:0006689^biological_process^ganglioside catabolic process	GO:0005764^cellular_component^lysosome`GO:0008047^molecular_function^enzyme activator activity`GO:0016787^molecular_function^hydrolase activity`GO:0006689^biological_process^ganglioside catabolic process	GO:0005764^cellular_component^lysosome	GO:0008047^molecular_function^enzyme activator activity	GO:0016787;GO:0006689	Y	FALSE	FALSE	6.70391	3.91061	4.46927	2.23464	3.35196	6.14525	2.23464	7.82123	10.0559	7.82123	1.11732	3.35196	6.14525	3.35196	4.46927	9.49721	3.35196	10.0559	2.23464	1.67598	100	6.70391	7.26257
>TRINITY_DN10314_c0_g1_i4.p1 TRINITY_DN10314_c0_g1~~TRINITY_DN10314_c0_g1_i4.p1 ORF type:complete len:141 (-),score=14.42 TRINITY_DN10314_c0_g1_i4:269-691(-)	13.36	735	5	4	0	29.29	140	TRINITY_DN10314_c0_g1_i4.p1	TRINITY_DN10314_c0_g1_i4	PROF_CLYJA^PROF_CLYJA^Q:691-272,H:1-140^86.429%ID^E:1.22e-86^RecName: Full	Profilin	TRINITY_DN10314_c0_g1_i4.p1	PROF_CLYJA^PROF_CLYJA^Q:1-140,H:1-140^86.429%ID^E:1.07e-88^RecName: Full=Profilin;^Eukaryota; Metazoa; Echinodermata; Eleutherozoa; Echinozoa; Echinoidea; Euechinoidea; Gnathostomata; Clypeasteroida; Clypeasteridae; Clypeaster	.	.	.	.	GO:0005737^cellular_component^cytoplasm`GO:0005856^cellular_component^cytoskeleton`GO:0003779^molecular_function^actin binding	GO:0005737^cellular_component^cytoplasm`GO:0005856^cellular_component^cytoskeleton`GO:0003779^molecular_function^actin binding	GO:0005737^cellular_component^cytoplasm	GO:0005856^cellular_component^cytoskeleton	GO:0003779;	Y	+	FALSE	12.1429	2.14286	5	5.71429	2.85714	12.1429	2.85714	5.71429	8.57143	7.85714	2.14286	2.85714	2.14286	5	2.14286	7.85714	5	4.28571	1.42857	2.14286	100	10.7143	6.42857	OTHER
>TRINITY_DN10319_c0_g1_i1.p1 TRINITY_DN10319_c0_g1~~TRINITY_DN10319_c0_g1_i1.p1 ORF type:5prime_partial len:174 (+),score=20.64 TRINITY_DN10319_c0_g1_i1:2-523(+)	6.35	479.4	3	2	1	15.61	173	TRINITY_DN10319_c0_g1_i1.p1	TRINITY_DN10319_c0_g1_i1	SODC_PBCV1^SODC_PBCV1^Q:44-499,H:22-179^42.236%ID^E:3.32e-32^RecName: Full	Superoxide dismutase [Cu-Zn]	TRINITY_DN10319_c0_g1_i1.p1	SODC_PBCV1^SODC_PBCV1^Q:15-166,H:22-179^42.236%ID^E:3.05e-33^RecName: Full=Superoxide dismutase [Cu-Zn];^Viruses; Phycodnaviridae; Chlorovirus	.	.	.	KEGG:vg:918416`KO:K04565	GO:0046872^molecular_function^metal ion binding`GO:0004784^molecular_function^superoxide dismutase activity	GO:0046872^molecular_function^metal ion binding`GO:0004784^molecular_function^superoxide dismutase activity	GO:0046872^molecular_function^metal ion binding	GO:0004784^molecular_function^superoxide dismutase activity		Y	FALSE	FALSE	6.93642	2.31214	4.62428	4.62428	3.46821	13.8728	5.20231	4.62428	2.89017	5.20231	1.15607	5.20231	4.62428	4.04624	5.78035	8.09249	4.04624	6.35838	1.15607	5.78035	100	9.24855	10.4046
>TRINITY_DN10423_c0_g1_i6.p1 TRINITY_DN10423_c0_g1~~TRINITY_DN10423_c0_g1_i6.p1 ORF type:complete len:880 (+),score=138.75 TRINITY_DN10423_c0_g1_i6:68-2707(+)	6.19	478.9	14	9	2	8.3	879	TRINITY_DN10423_c0_g1_i6.p1	TRINITY_DN10423_c0_g1_i6	PIWL1_HUMAN^PIWL1_HUMAN^Q:395-2704,H:103-861^48.072%ID^E:0^RecName: Full	Piwi-like protein 1	TRINITY_DN10423_c0_g1_i6.p1	PIWL1_MOUSE^PIWL1_MOUSE^Q:15-879,H:23-862^45.475%ID^E:0^RecName: Full=Piwi-like protein 1 {ECO:0000305};^Eukaryota; Metazoa; Chordata; Craniata; Vertebrata; Euteleostomi; Mammalia; Eutheria; Euarchontoglires; Glires; Rodentia; Myomorpha; Muroidea; Muridae; Murinae; Mus; Mus	.	.	ENOG410XNRH^piwi-like	KEGG:mmu:57749`KO:K02156	GO:0033391^cellular_component^chromatoid body`GO:0005737^cellular_component^cytoplasm`GO:0097433^cellular_component^dense body`GO:0005634^cellular_component^nucleus`GO:0043186^cellular_component^P granule`GO:0004521^molecular_function^endoribonuclease activity`GO:0046872^molecular_function^metal ion binding`GO:0003729^molecular_function^mRNA binding`GO:0140262^molecular_function^mRNA cap binding …	GO:0033391^cellular_component^chromatoid body`GO:0005737^cellular_component^cytoplasm`GO:0005829^cellular_component^cytosol`GO:0097433^cellular_component^dense body`GO:0005634^cellular_component^nucleus`GO:0043186^cellular_component^P granule`GO:0004521^molecular_function^endoribonuclease activity`GO:0046872^molecular_function^metal ion binding`GO:0003729^molecular_function^mRNA binding`GO:014026…	GO:0033391^cellular_component^chromatoid body	GO:0005737^cellular_component^cytoplasm	GO:0005829;GO:0097433;GO:0005634;GO:0043186;GO:0004521;GO:0046872;GO:0003729;GO:0140262;GO:0034584;GO:1905538;GO:0019901;GO:0003727;GO:0031047;GO:0051321;GO:0007275;GO:0010529;GO:0034587;GO:0006417;GO:0007286;GO:0007283;GO:0035093;	Y	+	FALSE	6.37088	1.25142	4.89192	4.89192	3.18544	7.05347	2.27531	4.89192	5.68828	8.41866	2.95791	4.77816	6.82594	6.14334	7.84983	4.77816	6.82594	6.25711	1.02389	3.6405	100	9.78385	7.84983	OTHER
>TRINITY_DN10485_c0_g1_i1.p1 TRINITY_DN10485_c0_g1~~TRINITY_DN10485_c0_g1_i1.p1 ORF type:internal len:151 (-),score=27.60 TRINITY_DN10485_c0_g1_i1:2-451(-)	4.42	595.3	2	2	0	14	150	TRINITY_DN10485_c0_g1_i1.p1	TRINITY_DN10485_c0_g1_i1	MLRP2_ACRMI^MLRP2_ACRMI^Q:451-2,H:4811-4957^59.333%ID^E:2.05e-52^RecName: Full	MAM and LDL-receptor class A domain-containing protein 2	TRINITY_DN10485_c0_g1_i1.p1	MLRP2_ACRMI^MLRP2_ACRMI^Q:1-150,H:4811-4957^59.333%ID^E:1.85e-52^RecName: Full=MAM and LDL-receptor class A domain-containing protein 2;^Eukaryota; Metazoa; Cnidaria; Anthozoa; Hexacorallia; Scleractinia; Astrocoeniina; Acroporidae; Acropora	.	.	.	.	GO:0005576^cellular_component^extracellular region`GO:0016020^cellular_component^membrane	GO:0005576^cellular_component^extracellular region`GO:0016020^cellular_component^membrane	GO:0005576^cellular_component^extracellular region	GO:0016020^cellular_component^membrane		Y	FALSE	FALSE	7.33333	6	8	4.66667	3.33333	12	0.666667	3.33333	6	4.66667	2	4.66667	4.66667	3.33333	6.66667	8.66667	6.66667	2	2.66667	2.66667	100	12.6667	8.66667
>TRINITY_DN106204_c0_g1_i1.p1 TRINITY_DN106204_c0_g1~~TRINITY_DN106204_c0_g1_i1.p1 ORF type:complete len:228 (-),score=68.14 TRINITY_DN106204_c0_g1_i1:66-749(-)	2.07	366.6	2	2	1	7.49	227	TRINITY_DN106204_c0_g1_i1.p1	TRINITY_DN106204_c0_g1_i1	HSP31_CANAL^HSP31_CANAL^Q:749-84,H:1-230^34.335%ID^E:8.86e-31^RecName: Full	Glyoxalase 3 {ECO:0000303|PubMed:24302734}	TRINITY_DN106204_c0_g1_i1.p1	HSP31_CANAL^HSP31_CANAL^Q:1-222,H:1-230^34.335%ID^E:7.8e-32^RecName: Full=Glyoxalase 3 {ECO:0000303|PubMed:24302734};^Eukaryota; Fungi; Dikarya; Ascomycota; Saccharomycotina; Saccharomycetes; Saccharomycetales; Debaryomycetaceae; Candida/Lodderomyces clade; Candida	.	.	.	KEGG:cal:CAALFM_C302610CA`KO:K22211	GO:0062040^cellular_component^fungal biofilm matrix`GO:0030446^cellular_component^hyphal cell wall`GO:0030445^cellular_component^yeast-form cell wall`GO:0019172^molecular_function^glyoxalase III activity`GO:0019243^biological_process^methylglyoxal catabolic process to D-lactate via S-lactoyl-glutathione	GO:0062040^cellular_component^fungal biofilm matrix`GO:0030446^cellular_component^hyphal cell wall`GO:0030445^cellular_component^yeast-form cell wall`GO:0019172^molecular_function^glyoxalase III activity`GO:0019243^biological_process^methylglyoxal catabolic process to D-lactate via S-lactoyl-glutathione	GO:0062040^cellular_component^fungal biofilm matrix	GO:0030446^cellular_component^hyphal cell wall	GO:0030445;GO:0019172;GO:0019243;	Y	+	FALSE	11.0132	3.0837	4.84581	6.60793	4.84581	7.92952	2.64317	1.76211	9.2511	7.92952	3.52423	4.40529	5.72687	2.64317	0.881057	3.52423	5.28634	11.0132	0.440529	2.64317	100	11.4537	7.92952	OTHER
>TRINITY_DN106333_c0_g1_i1.p1 TRINITY_DN106333_c0_g1~~TRINITY_DN106333_c0_g1_i1.p1 ORF type:internal len:108 (-),score=18.01 TRINITY_DN106333_c0_g1_i1:2-322(-)	5.76	383.5	6	4	1	36.45	107	TRINITY_DN106333_c0_g1_i1.p1	TRINITY_DN106333_c0_g1_i1	NID1_HUMAN^NID1_HUMAN^Q:301-107,H:846-916^53.521%ID^E:1.48e-16^RecName: Full	Nidogen-1	TRINITY_DN106333_c0_g1_i1.p1	NID1_HUMAN^NID1_HUMAN^Q:8-72,H:846-916^53.521%ID^E:1.33e-16^RecName: Full=Nidogen-1;^Eukaryota; Metazoa; Chordata; Craniata; Vertebrata; Euteleostomi; Mammalia; Eutheria; Euarchontoglires; Primates; Haplorrhini; Catarrhini; Hominidae; Homo	.	.	ENOG410XR8N^nidogen 1	KEGG:hsa:4811`KO:K06826	GO:0005604^cellular_component^basement membrane`GO:0062023^cellular_component^collagen-containing extracellular matrix`GO:0070062^cellular_component^extracellular exosome`GO:0005576^cellular_component^extracellular region`GO:0005886^cellular_component^plasma membrane`GO:0043235^cellular_component^receptor complex`GO:0005509^molecular_function^calcium ion binding`GO:0005518^molecular_function^coll…	GO:0005604^cellular_component^basement membrane`GO:0062023^cellular_component^collagen-containing extracellular matrix`GO:0070062^cellular_component^extracellular exosome`GO:0005576^cellular_component^extracellular region`GO:0005886^cellular_component^plasma membrane`GO:0043235^cellular_component^receptor complex`GO:0005509^molecular_function^calcium ion binding`GO:0005518^molecular_function^coll…	GO:0005604^cellular_component^basement membrane	GO:0062023^cellular_component^collagen-containing extracellular matrix	GO:0070062;GO:0005576;GO:0005886;GO:0043235;GO:0005509;GO:0005518;GO:0005201;GO:0043236;GO:0043237;GO:0043394;GO:0042813;GO:0017147;GO:0071711;GO:0060070;GO:0007160;GO:0030198;GO:0032836;GO:0010811	Y	FALSE	FALSE	5.60748	8.41121	8.41121	4.6729	1.86916	10.2804	3.73832	3.73832	6.54206	3.73832	4.6729	1.86916	7.47664	5.60748	7.47664	6.54206	3.73832	2.80374	0.934579	1.86916	100	13.0841	4.6729
>TRINITY_DN10934_c0_g1_i1.p1 TRINITY_DN10934_c0_g1~~TRINITY_DN10934_c0_g1_i1.p1 ORF type:complete len:259 (-),score=23.77 TRINITY_DN10934_c0_g1_i1:120-896(-)	3.17	429.6	6	4	2	15.89	258	TRINITY_DN10934_c0_g1_i1.p1	TRINITY_DN10934_c0_g1_i1	ACTP1_ANTAS^ACTP1_ANTAS^Q:638-126,H:42-212^48.256%ID^E:2.02e-49^RecName: Full	DELTA-actitoxin-Aas1a {ECO:0000303|PubMed:22683676}	TRINITY_DN10934_c0_g1_i1.p1	ACTP1_ANTAS^ACTP1_ANTAS^Q:52-257,H:4-212^44.286%ID^E:3.13e-53^RecName: Full=DELTA-actitoxin-Aas1a {ECO:0000303|PubMed:22683676};^Eukaryota; Metazoa; Cnidaria; Anthozoa; Hexacorallia; Actiniaria; Actiniidae; Anthopleura	tr|A0A2B4RWI5|A0A2B4RWI5_STYPI^tr|A0A2B4RWI5|A0A2B4RWI5_STYPI^Q:1170-361,H:96-365^65.556%ID^E:9.02e-127^.^.	.	.	.	GO:0005576^cellular_component^extracellular region`GO:0042151^cellular_component^nematocyst`GO:0044218^cellular_component^other organism cell membrane`GO:0046930^cellular_component^pore complex`GO:0015267^molecular_function^channel activity`GO:0090729^molecular_function^toxin activity`GO:0006812^biological_process^cation transport`GO:0052331^biological_process^hemolysis in other organism involved…	GO:0005576^cellular_component^extracellular region`GO:0042151^cellular_component^nematocyst`GO:0044218^cellular_component^other organism cell membrane`GO:0046930^cellular_component^pore complex`GO:0015267^molecular_function^channel activity`GO:0090729^molecular_function^toxin activity`GO:0006812^biological_process^cation transport`GO:0052331^biological_process^hemolysis in other organism involved…	GO:0005576^cellular_component^extracellular region	GO:0042151^cellular_component^nematocyst	GO:0044218;GO:0046930;GO:0015267;GO:0090729;GO:0006812;GO:0052331;GO:0009405;GO:0046931	Y	+	FALSE	5.42636	1.93798	6.58915	5.03876	3.10078	9.68992	2.32558	3.10078	8.13953	9.68992	1.93798	4.65116	2.71318	2.32558	4.65116	8.13953	4.26357	8.91473	2.32558	5.03876	100	11.6279	10.4651	OTHER
>TRINITY_DN1101_c0_g1_i5.p1 TRINITY_DN1101_c0_g1~~TRINITY_DN1101_c0_g1_i5.p1 ORF type:complete len:782 (-),score=248.63 TRINITY_DN1101_c0_g1_i5:554-2899(-)	4.67	471.9	4	4	0	4.87	781	TRINITY_DN1101_c0_g1_i5.p1	TRINITY_DN1101_c0_g1_i5	NCB5R_LACBS^NCB5R_LACBS^Q:1309-662,H:82-293^35.185%ID^E:1.13e-38^RecName: Full	NADH-cytochrome b5 reductase 1	TRINITY_DN1101_c0_g1_i5.p1	NCB5R_LACBS^NCB5R_LACBS^Q:510-746,H:61-293^33.333%ID^E:6.38e-39^RecName: Full=NADH-cytochrome b5 reductase 1;^Eukaryota; Fungi; Dikarya; Basidiomycota; Agaricomycotina; Agaricomycetes; Agaricomycetidae; Agaricales; Tricholomataceae; Laccaria	.	.	COG0543^cytochrome-b5 reductase activity, acting on NAD(P)H	KEGG:lbc:LACBIDRAFT_300832`KO:K00326	GO:0005789^cellular_component^endoplasmic reticulum membrane`GO:0016021^cellular_component^integral component of membrane`GO:0005741^cellular_component^mitochondrial outer membrane`GO:0004128^molecular_function^cytochrome-b5 reductase activity, acting on NAD(P)H	GO:0005789^cellular_component^endoplasmic reticulum membrane`GO:0016021^cellular_component^integral component of membrane`GO:0005741^cellular_component^mitochondrial outer membrane`GO:0004128^molecular_function^cytochrome-b5 reductase activity, acting on NAD(P)H	GO:0005789^cellular_component^endoplasmic reticulum membrane	GO:0016021^cellular_component^integral component of membrane	GO:0005741;GO:0004128	Y	+	FALSE	6.78617	2.56082	6.53009	5.37772	4.48143	8.96287	2.30474	2.8169	6.27401	9.09091	3.20102	3.45711	4.9936	4.22535	4.09731	7.29834	4.9936	6.65813	1.66453	4.22535	100	11.9078	10.3713	OTHER
>TRINITY_DN111_c0_g1_i4.p1 TRINITY_DN111_c0_g1~~TRINITY_DN111_c0_g1_i4.p1 ORF type:5prime_partial len:300 (+),score=60.56 TRINITY_DN111_c0_g1_i4:1-900(+)	6.99	631.5	2	2	1	9.7	299	TRINITY_DN111_c0_g1_i4.p1	TRINITY_DN111_c0_g1_i4	MATN1_CHICK^MATN1_CHICK^Q:349-810,H:280-422^31.818%ID^E:7.03e-12^RecName: Full	Cartilage matrix protein	TRINITY_DN111_c0_g1_i4.p1	HMCN1_MOUSE^HMCN1_MOUSE^Q:44-100,H:4697-4753^50.877%ID^E:3.62e-16^RecName: Full=Hemicentin-1 {ECO:0000312|MGI:MGI:2685047};^Eukaryota; Metazoa; Chordata; Craniata; Vertebrata; Euteleostomi; Mammalia; Eutheria; Euarchontoglires; Glires; Rodentia; Myomorpha; Muroidea; Muridae; Murinae; Mus; Mus	tr|A0A2B4SFU9|A0A2B4SFU9_STYPI^tr|A0A2B4SFU9|A0A2B4SFU9_STYPI^Q:130-2880,H:632-1535^80.844%ID^E:0^.^.	.	ENOG410ZN3C^von Willebrand factor A domain containing 7	KEGG:mmu:545370`KO:K17341	GO:0062023^cellular_component^collagen-containing extracellular matrix`GO:0031012^cellular_component^extracellular matrix`GO:0005615^cellular_component^extracellular space`GO:0005509^molecular_function^calcium ion binding`GO:0005201^molecular_function^extracellular matrix structural constituent`GO:0003429^biological_process^growth plate cartilage chondrocyte morphogenesis	GO:0005604^cellular_component^basement membrane`GO:0005938^cellular_component^cell cortex`GO:0030054^cellular_component^cell junction`GO:0032154^cellular_component^cleavage furrow`GO:0062023^cellular_component^collagen-containing extracellular matrix`GO:0005576^cellular_component^extracellular region`GO:0005509^molecular_function^calcium ion binding`GO:0050839^molecular_function^cell adhesion mol…	GO:0005604^cellular_component^basement membrane	GO:0005938^cellular_component^cell cortex	GO:0030054;GO:0032154;GO:0062023;GO:0005576;GO:0005509;GO:0050839;GO:0042803;GO:0038023;GO:0007049;GO:0051301;GO:0007157;GO:0007156;GO:0009617;	Y	FALSE	FALSE	6.35452	3.01003	8.02676	9.0301	3.01003	8.69565	1.67224	7.35786	7.69231	6.68896	0.668896	3.34448	5.68562	2.67559	4.34783	3.67893	8.02676	7.69231	1.00334	1.33779	100	17.0569	5.35117
>TRINITY_DN11122_c0_g1_i2.p1 TRINITY_DN11122_c0_g1~~TRINITY_DN11122_c0_g1_i2.p1 ORF type:complete len:524 (-),score=151.66 TRINITY_DN11122_c0_g1_i2:1525-3000(-)	2.82	397.1	3	3	0	5.3	491	TRINITY_DN11122_c0_g1_i2.p1	TRINITY_DN11122_c0_g1_i2	DHE3_BACTN^DHE3_BACTN^Q:2847-1528,H:7-444^61.136%ID^E:8.33e-176^RecName: Full	Glutamate dehydrogenase	TRINITY_DN11122_c0_g1_i2.p1	DHE3_BACTN^DHE3_BACTN^Q:84-523,H:7-444^61.136%ID^E:0^RecName: Full=Glutamate dehydrogenase;^Bacteria; Bacteroidetes; Bacteroidia; Bacteroidales; Bacteroidaceae; Bacteroides	.	.	COG0334^oxidoreductase activity, acting on the CH-NH2 group of donors, NAD or NADP as acceptor	KEGG:bth:BT_1970`KO:K00262	GO:0005829^cellular_component^cytosol`GO:0004354^molecular_function^glutamate dehydrogenase (NADP+) activity`GO:0006537^biological_process^glutamate biosynthetic process	GO:0005829^cellular_component^cytosol`GO:0004354^molecular_function^glutamate dehydrogenase (NADP+) activity`GO:0006537^biological_process^glutamate biosynthetic process	GO:0005829^cellular_component^cytosol	GO:0004354^molecular_function^glutamate dehydrogenase (NADP+) activity	GO:0006537;	Y	+	FALSE	8.14664	1.62933	4.68432	6.72098	4.48065	10.387	1.83299	2.24033	4.27699	8.55397	2.44399	4.68432	3.86965	4.07332	6.31365	7.33198	4.48065	9.97963	1.01833	2.85132	100	11.4053	8.35031	OTHER
>TRINITY_DN11376_c0_g1_i1.p1 TRINITY_DN11376_c0_g1~~TRINITY_DN11376_c0_g1_i1.p1 ORF type:complete len:232 (+),score=48.49 TRINITY_DN11376_c0_g1_i1:85-780(+)	3.85	442.8	4	3	1	7.79	231	TRINITY_DN11376_c0_g1_i1.p1	TRINITY_DN11376_c0_g1_i1	CLIC5_MOUSE^CLIC5_MOUSE^Q:112-723,H:18-242^37.281%ID^E:6.59e-25^RecName: Full	Chloride intracellular channel protein 5	TRINITY_DN11376_c0_g1_i1.p1	CLIC5_RAT^CLIC5_RAT^Q:10-213,H:18-242^37.445%ID^E:5.24e-35^RecName: Full=Chloride intracellular channel protein 5;^Eukaryota; Metazoa; Chordata; Craniata; Vertebrata; Euteleostomi; Mammalia; Eutheria; Euarchontoglires; Glires; Rodentia; Myomorpha; Muroidea; Muridae; Murinae; Rattus	tr|A0A3M6VA11|A0A3M6VA11_9CNID^tr|A0A3M6VA11|A0A3M6VA11_9CNID^Q:846-82,H:212-479^58.955%ID^E:3.44e-86^.^.	.	ENOG410ZRK6^Chloride intracellular channel	KEGG:rno:94272`KO:K05025	GO:0015629^cellular_component^actin cytoskeleton`GO:0016324^cellular_component^apical plasma membrane`GO:0005938^cellular_component^cell cortex`GO:0034707^cellular_component^chloride channel complex`GO:0005794^cellular_component^Golgi apparatus`GO:0005815^cellular_component^microtubule organizing center`GO:0005634^cellular_component^nucleus`GO:0032420^cellular_component^stereocilium`GO:0032421^ce…	GO:0015629^cellular_component^actin cytoskeleton`GO:0016324^cellular_component^apical plasma membrane`GO:0005938^cellular_component^cell cortex`GO:0034707^cellular_component^chloride channel complex`GO:0005794^cellular_component^Golgi apparatus`GO:0005815^cellular_component^microtubule organizing center`GO:0005634^cellular_component^nucleus`GO:0032420^cellular_component^stereocilium`GO:0032421^ce…	GO:0015629^cellular_component^actin cytoskeleton	GO:0016324^cellular_component^apical plasma membrane	GO:0005938;GO:0034707;GO:0005794;GO:0005815;GO:0005634;GO:0032420;GO:0032421;GO:0005254;GO:0005244;GO:0060088;GO:0006821;GO:0002024;GO:0050885;GO:0008104;GO:0034765;GO:0002021;GO:0007605;GO:0007601	Y	+	FALSE	6.06061	0.865801	6.92641	7.79221	5.62771	7.79221	2.1645	5.62771	8.65801	12.5541	3.0303	3.0303	5.62771	3.0303	3.8961	5.19481	3.8961	6.49351	0.4329	1.2987	100	14.7186	7.35931	OTHER
>TRINITY_DN1157_c0_g1_i1.p1 TRINITY_DN1157_c0_g1~~TRINITY_DN1157_c0_g1_i1.p1 ORF type:internal len:427 (-),score=43.01 TRINITY_DN1157_c0_g1_i1:1-1278(-)	4.26	458.8	4	4	0	7.51	426	TRINITY_DN1157_c0_g1_i1.p1	TRINITY_DN1157_c0_g1_i1	SAX3_CAEEL^SAX3_CAEEL^Q:918-91,H:159-425^28.47%ID^E:1.34e-24^RecName: Full	Protein sax-3	TRINITY_DN1157_c0_g1_i1.p1	SAX3_CAEEL^SAX3_CAEEL^Q:121-396,H:159-425^28.47%ID^E:1.2e-24^RecName: Full=Protein sax-3;^Eukaryota; Metazoa; Ecdysozoa; Nematoda; Chromadorea; Rhabditida; Rhabditina; Rhabditomorpha; Rhabditoidea; Rhabditidae; Peloderinae; Caenorhabditis	tr|A0A2B4S2X3|A0A2B4S2X3_STYPI^tr|A0A2B4S2X3|A0A2B4S2X3_STYPI^Q:381-1,H:91-217^85.039%ID^E:1.06e-78^.^.	.	ENOG410XPQS^Roundabout, axon guidance receptor, homolog	KEGG:cel:CELE_ZK377.2`KO:K06754	GO:0005829^cellular_component^cytosol`GO:0005887^cellular_component^integral component of plasma membrane`GO:0008046^molecular_function^axon guidance receptor activity`GO:0033563^biological_process^dorsal/ventral axon guidance`GO:0001764^biological_process^neuron migration`GO:1905489^biological_process^regulation of sensory neuron axon guidance`GO:0035385^biological_process^Roundabout signaling p…	GO:0005829^cellular_component^cytosol`GO:0005887^cellular_component^integral component of plasma membrane`GO:0008046^molecular_function^axon guidance receptor activity`GO:0033563^biological_process^dorsal/ventral axon guidance`GO:0001764^biological_process^neuron migration`GO:1905489^biological_process^regulation of sensory neuron axon guidance`GO:0035385^biological_process^Roundabout signaling p…	GO:0005829^cellular_component^cytosol	GO:0005887^cellular_component^integral component of plasma membrane	GO:0008046;GO:0033563;GO:0001764;GO:1905489;GO:0035385;GO:0097374	Y	FALSE	FALSE	5.86854	2.11268	5.6338	5.39906	1.87793	8.4507	1.64319	7.51174	7.74648	4.22535	1.17371	3.75587	4.22535	3.28638	4.46009	7.04225	8.21596	10.7981	0.938967	5.6338	100	11.0329	8.4507
>TRINITY_DN11763_c0_g1_i1.p1 TRINITY_DN11763_c0_g1~~TRINITY_DN11763_c0_g1_i1.p1 ORF type:complete len:191 (-),score=67.19 TRINITY_DN11763_c0_g1_i1:276-848(-)	4.88	497.6	8	2	0	10	190	TRINITY_DN11763_c0_g1_i1.p1	TRINITY_DN11763_c0_g1_i1	H10_MOUSE^H10_MOUSE^Q:782-573,H:28-97^64.286%ID^E:2.07e-22^RecName: Full	Histone H1.0	TRINITY_DN11763_c0_g1_i1.p1	H10A_XENLA^H10A_XENLA^Q:2-90,H:5-93^62.921%ID^E:1.02e-32^RecName: Full=Histone H1.0-A;^Eukaryota; Metazoa; Chordata; Craniata; Vertebrata; Euteleostomi; Amphibia; Batrachia; Anura; Pipoidea; Pipidae; Xenopodinae; Xenopus; Xenopus	.	.	ENOG4112541^Histone cluster 1	KEGG:xla:398662`KO:K11275	GO:0015629^cellular_component^actin cytoskeleton`GO:0005794^cellular_component^Golgi apparatus`GO:0016604^cellular_component^nuclear body`GO:0000790^cellular_component^nuclear chromatin`GO:0005719^cellular_component^nuclear euchromatin`GO:0005654^cellular_component^nucleoplasm`GO:0000786^cellular_component^nucleosome`GO:0005634^cellular_component^nucleus`GO:0017053^cellular_component^transcriptio…	GO:0000786^cellular_component^nucleosome`GO:0005634^cellular_component^nucleus`GO:0003677^molecular_function^DNA binding`GO:0030261^biological_process^chromosome condensation`GO:0006334^biological_process^nucleosome assembly	GO:0000786^cellular_component^nucleosome	GO:0005634^cellular_component^nucleus	GO:0003677;GO:0030261;GO:0006334;	Y	+	FALSE	22.6316	0	1.05263	2.10526	0.526316	4.21053	1.05263	2.10526	29.4737	2.63158	1.05263	2.10526	9.47368	2.10526	2.10526	5.78947	3.68421	6.84211	0	1.05263	100	3.15789	1.57895	OTHER
>TRINITY_DN11770_c0_g2_i6.p1 TRINITY_DN11770_c0_g2~~TRINITY_DN11770_c0_g2_i6.p1 ORF type:5prime_partial len:228 (-),score=23.57 TRINITY_DN11770_c0_g2_i6:345-1028(-)	4.81	439.7	4	3	1	19.38	227	TRINITY_DN11770_c0_g2_i6.p1	TRINITY_DN11770_c0_g2_i6	SCR11_NOTSL^SCR11_NOTSL^Q:980-348,H:2-205^35.071%ID^E:3.33e-37^RecName: Full	S-crystallin SL11	TRINITY_DN11770_c0_g2_i6.p1	SCR11_NOTSL^SCR11_NOTSL^Q:17-227,H:2-205^35.071%ID^E:1.51e-38^RecName: Full=S-crystallin SL11;^Eukaryota; Metazoa; Lophotrochozoa; Mollusca; Cephalopoda; Coleoidea; Neocoleoidea; Decapodiformes; Teuthida; Oegopsina; Ommastrephidae; Nototodarus	.	.	.	.	GO:0005212^molecular_function^structural constituent of eye lens	GO:0005212^molecular_function^structural constituent of eye lens	GO:0005212^molecular_function^structural constituent of eye lens			Y	FALSE	FALSE	9.2511	0.440529	6.60793	7.04846	4.84581	5.72687	0.881057	6.60793	7.04846	12.3348	3.0837	4.40529	7.04846	3.52423	6.60793	2.64317	1.76211	4.84581	1.32159	3.96476	100	13.6564	10.1322
>TRINITY_DN1203_c0_g1_i1.p1 TRINITY_DN1203_c0_g1~~TRINITY_DN1203_c0_g1_i1.p1 ORF type:5prime_partial len:1889 (+),score=367.01 TRINITY_DN1203_c0_g1_i1:3-5669(+)	14.29	514.5	14	13	6	6.41	1888	TRINITY_DN1203_c0_g1_i1.p1	TRINITY_DN1203_c0_g1_i1	MLRP2_ACRMI^MLRP2_ACRMI^Q:3-4649,H:5758-7297^61.647%ID^E:0^RecName: Full	MAM and LDL-receptor class A domain-containing protein 2	TRINITY_DN1203_c0_g1_i1.p1	MLRP2_ACRMI^MLRP2_ACRMI^Q:1-1549,H:5758-7297^61.647%ID^E:0^RecName: Full=MAM and LDL-receptor class A domain-containing protein 2;^Eukaryota; Metazoa; Cnidaria; Anthozoa; Hexacorallia; Scleractinia; Astrocoeniina; Acroporidae; Acropora	.	ExpAA=23.22^PredHel=1^Topology=o1765-1787i	.	.	GO:0005576^cellular_component^extracellular region`GO:0016020^cellular_component^membrane	GO:0005576^cellular_component^extracellular region`GO:0016020^cellular_component^membrane	GO:0005576^cellular_component^extracellular region	GO:0016020^cellular_component^membrane		Y	FALSE	FALSE	5.98517	5.08475	8.20975	3.07203	4.29025	10.4873	1.95975	3.4428	5.45551	4.92585	2.01271	5.34958	4.81992	3.60169	4.97881	8.26271	6.35593	5.03178	2.38347	4.29025	100	11.2818	10.964
>TRINITY_DN12185_c0_g1_i15.p1 TRINITY_DN12185_c0_g1~~TRINITY_DN12185_c0_g1_i15.p1 ORF type:complete len:228 (-),score=17.61 TRINITY_DN12185_c0_g1_i15:289-972(-)	6.65	545.6	5	4	0	14.98	227	TRINITY_DN12185_c0_g1_i15.p1	TRINITY_DN12185_c0_g1_i15	MET27_HUMAN^MET27_HUMAN^Q:891-241,H:31-234^27.982%ID^E:1.68e-18^RecName: Full	Methyltransferase-like protein 27 {ECO:0000312|HGNC:HGNC:19068}	TRINITY_DN12185_c0_g1_i15.p1	MET27_HUMAN^MET27_HUMAN^Q:28-208,H:31-206^30.601%ID^E:1.61e-19^RecName: Full=Methyltransferase-like protein 27 {ECO:0000312|HGNC:HGNC:19068};^Eukaryota; Metazoa; Chordata; Craniata; Vertebrata; Euteleostomi; Mammalia; Eutheria; Euarchontoglires; Primates; Haplorrhini; Catarrhini; Hominidae; Homo	.	.	COG0500^Methyltransferase	KEGG:hsa:155368	.	.	.			Y	+	FALSE	8.37004	2.64317	7.48899	7.48899	2.64317	7.04846	3.96476	7.48899	9.2511	7.04846	1.76211	3.52423	3.0837	2.64317	3.0837	2.64317	7.04846	6.60793	0.440529	5.72687	100	14.978	8.81057	OTHER
>TRINITY_DN12800_c0_g1_i4.p1 TRINITY_DN12800_c0_g1~~TRINITY_DN12800_c0_g1_i4.p1 ORF type:internal len:165 (-),score=15.71 TRINITY_DN12800_c0_g1_i4:2-493(-)	4.23	455.4	3	2	0	11.59	164	TRINITY_DN12800_c0_g1_i4.p1	TRINITY_DN12800_c0_g1_i4	no blast hit	no blast hit	TRINITY_DN12800_c0_g1_i4.p1	.	.	.	.	.	.	.	.			Y	FALSE	FALSE	8.53659	4.87805	1.82927	7.92683	5.4878	4.87805	3.04878	2.43902	4.26829	14.6341	1.21951	4.87805	1.21951	6.70732	6.09756	7.31707	4.26829	6.09756	0.609756	3.65854	100	9.7561	9.7561
>TRINITY_DN13319_c0_g1_i2.p1 TRINITY_DN13319_c0_g1~~TRINITY_DN13319_c0_g1_i2.p1 ORF type:5prime_partial len:215 (-),score=30.53 TRINITY_DN13319_c0_g1_i2:100-744(-)	17.44	656.7	6	5	0	22.43	214	TRINITY_DN13319_c0_g1_i2.p1	TRINITY_DN13319_c0_g1_i2	no blast hit	no blast hit	TRINITY_DN13319_c0_g1_i2.p1	.	.	ExpAA=18.82^PredHel=1^Topology=i21-40o	.	.	.	.	.			Y	FALSE	FALSE	4.6729	10.2804	4.6729	7.47664	3.27103	4.6729	0.934579	6.07477	9.81308	7.94393	0.46729	2.80374	4.20561	1.86916	7.47664	8.8785	6.07477	6.54206	0.46729	1.40187	100	12.1495	5.14019
>TRINITY_DN1347_c2_g1_i9.p1 TRINITY_DN1347_c2_g1~~TRINITY_DN1347_c2_g1_i9.p1 ORF type:5prime_partial len:268 (-),score=35.66 TRINITY_DN1347_c2_g1_i9:113-916(-)	2.24	316.9	3	2	0	9.36	267	TRINITY_DN1347_c2_g1_i9.p1	TRINITY_DN1347_c2_g1_i9	PSB4_MOUSE^PSB4_MOUSE^Q:865-116,H:12-264^58.103%ID^E:1.3e-110^RecName: Full	Proteasome subunit beta type-4	TRINITY_DN1347_c2_g1_i9.p1	PSB4_MOUSE^PSB4_MOUSE^Q:18-267,H:12-264^58.103%ID^E:2.92e-111^RecName: Full=Proteasome subunit beta type-4;^Eukaryota; Metazoa; Chordata; Craniata; Vertebrata; Euteleostomi; Mammalia; Eutheria; Euarchontoglires; Glires; Rodentia; Myomorpha; Muroidea; Muridae; Murinae; Mus; Mus	.	.	ENOG410YAMA^The proteasome is a multicatalytic proteinase complex which is characterized by its ability to cleave peptides with Arg, Phe, Tyr, Leu, and Glu adjacent to the leaving group at neutral or slightly basic pH. The proteasome has an ATP-dependent proteolytic activity (By similarity)	KEGG:mmu:19172`KO:K02736	GO:0005737^cellular_component^cytoplasm`GO:0005829^cellular_component^cytosol`GO:0005654^cellular_component^nucleoplasm`GO:0005634^cellular_component^nucleus`GO:0000502^cellular_component^proteasome complex`GO:0005839^cellular_component^proteasome core complex`GO:0019774^cellular_component^proteasome core complex, beta-subunit complex`GO:0004175^molecular_function^endopeptidase activity`GO:000153…	GO:0005737^cellular_component^cytoplasm`GO:0005829^cellular_component^cytosol`GO:0005654^cellular_component^nucleoplasm`GO:0005634^cellular_component^nucleus`GO:0000502^cellular_component^proteasome complex`GO:0005839^cellular_component^proteasome core complex`GO:0019774^cellular_component^proteasome core complex, beta-subunit complex`GO:0004175^molecular_function^endopeptidase activity`GO:000153…	GO:0005737^cellular_component^cytoplasm	GO:0005829^cellular_component^cytosol	GO:0005654;GO:0005634;GO:0000502;GO:0005839;GO:0019774;GO:0004175;GO:0001530;GO:0004298;GO:0002862;GO:0010498;GO:0010499;GO:0043161	Y	FALSE	FALSE	7.86517	1.87266	5.61798	3.74532	4.86891	8.61423	2.24719	5.61798	4.49438	7.86517	1.87266	5.61798	5.24345	3.74532	4.86891	7.1161	6.36704	6.74157	1.49813	4.11985	100	9.3633	10.4869
>TRINITY_DN1399_c0_g1_i13.p1 TRINITY_DN1399_c0_g1~~TRINITY_DN1399_c0_g1_i13.p1 ORF type:5prime_partial len:332 (-),score=67.03 TRINITY_DN1399_c0_g1_i13:50-1045(-)	1.23	355.5	2	2	0	4.23	331	TRINITY_DN1399_c0_g1_i13.p1	TRINITY_DN1399_c0_g1_i13	FCN2_PIG^FCN2_PIG^Q:718-53,H:104-323^51.121%ID^E:1.66e-66^RecName: Full	Ficolin-2	TRINITY_DN1399_c0_g1_i13.p1	FCN2_PIG^FCN2_PIG^Q:110-331,H:104-323^51.121%ID^E:9.85e-67^RecName: Full=Ficolin-2;^Eukaryota; Metazoa; Chordata; Craniata; Vertebrata; Euteleostomi; Mammalia; Eutheria; Laurasiatheria; Artiodactyla; Suina; Suidae; Sus	tr|A0A3M6TNI6|A0A3M6TNI6_9CNID^tr|A0A3M6TNI6|A0A3M6TNI6_9CNID^Q:1318-1962,H:114-332^58.824%ID^E:2.24e-77^.^.	ExpAA=19.85^PredHel=1^Topology=i33-52o	ENOG410ZYS4^fibrinogen	KEGG:ssc:396881`KO:K10104	GO:0005581^cellular_component^collagen trimer`GO:0005576^cellular_component^extracellular region`GO:0030246^molecular_function^carbohydrate binding`GO:0046872^molecular_function^metal ion binding`GO:0001867^biological_process^complement activation, lectin pathway	GO:0005581^cellular_component^collagen trimer`GO:0005576^cellular_component^extracellular region`GO:0030246^molecular_function^carbohydrate binding`GO:0046872^molecular_function^metal ion binding`GO:0001867^biological_process^complement activation, lectin pathway	GO:0005581^cellular_component^collagen trimer	GO:0005576^cellular_component^extracellular region	GO:0030246;GO:0046872;GO:0001867;	Y	FALSE	FALSE	7.55287	2.71903	8.1571	4.53172	4.53172	10.2719	2.1148	2.1148	10.2719	8.45921	1.81269	4.83384	0.906344	3.62538	3.92749	6.34441	4.53172	6.64653	2.71903	3.92749	100	12.6888	11.1782
>TRINITY_DN14_c0_g1_i1.p1 TRINITY_DN14_c0_g1~~TRINITY_DN14_c0_g1_i1.p1 ORF type:complete len:501 (-),score=86.81 TRINITY_DN14_c0_g1_i1:208-1710(-)	8.44	478.2	7	7	4	14.4	500	TRINITY_DN14_c0_g1_i1.p1	TRINITY_DN14_c0_g1_i1	no blast hit	no blast hit	TRINITY_DN14_c0_g1_i1.p1	.	.	.	.	.	.	.	.			Y	+	FALSE	7	1.8	5.6	6.8	3.4	5.4	3.2	4	8	7.2	2.8	5.2	6	4.6	3.8	7	6.4	4.8	2	5	100	12.4	10.4	OTHER
>TRINITY_DN14383_c0_g1_i12.p1 TRINITY_DN14383_c0_g1~~TRINITY_DN14383_c0_g1_i12.p1 ORF type:complete len:640 (-),score=124.87 TRINITY_DN14383_c0_g1_i12:170-2089(-)	4.23	574.1	8	4	2	7.36	639	TRINITY_DN14383_c0_g1_i12.p1	TRINITY_DN14383_c0_g1_i12	HMCN1_MOUSE^HMCN1_MOUSE^Q:1480-785,H:4521-4745^45.69%ID^E:7.88e-57^RecName: Full	Hemicentin-1 {ECO:0000312|MGI:MGI:2685047}	TRINITY_DN14383_c0_g1_i12.p1	HMCN1_HUMAN^HMCN1_HUMAN^Q:204-445,H:4522-4754^44.628%ID^E:7.99e-66^RecName: Full=Hemicentin-1;^Eukaryota; Metazoa; Chordata; Craniata; Vertebrata; Euteleostomi; Mammalia; Eutheria; Euarchontoglires; Primates; Haplorrhini; Catarrhini; Hominidae; Homo	.	.	ENOG410ZN3C^von Willebrand factor A domain containing 7	KEGG:hsa:83872`KO:K17341	GO:0005604^cellular_component^basement membrane`GO:0005938^cellular_component^cell cortex`GO:0030054^cellular_component^cell junction`GO:0032154^cellular_component^cleavage furrow`GO:0062023^cellular_component^collagen-containing extracellular matrix`GO:0005576^cellular_component^extracellular region`GO:0005509^molecular_function^calcium ion binding`GO:0050839^molecular_function^cell adhesion mol…	GO:0005604^cellular_component^basement membrane`GO:0005938^cellular_component^cell cortex`GO:0032154^cellular_component^cleavage furrow`GO:0062023^cellular_component^collagen-containing extracellular matrix`GO:0070062^cellular_component^extracellular exosome`GO:0005509^molecular_function^calcium ion binding`GO:0050839^molecular_function^cell adhesion molecule binding`GO:0005201^molecular_function…	GO:0005604^cellular_component^basement membrane	GO:0005938^cellular_component^cell cortex	GO:0032154;GO:0062023;GO:0070062;GO:0005509;GO:0050839;GO:0005201;GO:0042803;GO:0038023;GO:0007049;GO:0051301;GO:0007157;GO:0007156;GO:0009617;GO:0007601	Y	+	FALSE	7.04225	4.53834	6.41628	8.4507	3.28638	10.3286	2.03443	4.38185	6.57277	6.41628	1.56495	4.22535	5.6338	1.40845	3.44288	6.25978	7.98122	6.88576	1.72144	1.40845	100	14.867	6.41628	SP(Sec/SPI)
>TRINITY_DN15098_c1_g1_i3.p1 TRINITY_DN15098_c1_g1~~TRINITY_DN15098_c1_g1_i3.p1 ORF type:complete len:262 (-),score=73.80 TRINITY_DN15098_c1_g1_i3:53-838(-)	8.13	539.9	4	3	0	10.34	261	TRINITY_DN15098_c1_g1_i3.p1	TRINITY_DN15098_c1_g1_i3	EF1D_MACFA^EF1D_MACFA^Q:826-56,H:6-281^48.913%ID^E:6.21e-61^RecName: Full	Elongation factor 1-delta	TRINITY_DN15098_c1_g1_i3.p1	EF1D_MACFA^EF1D_MACFA^Q:5-261,H:6-281^49.638%ID^E:2.3e-77^RecName: Full=Elongation factor 1-delta;^Eukaryota; Metazoa; Chordata; Craniata; Vertebrata; Euteleostomi; Mammalia; Eutheria; Euarchontoglires; Primates; Haplorrhini; Catarrhini; Cercopithecidae; Cercopithecinae; Macaca	.	.	.	KEGG:mcf:101866441`KO:K15410	GO:0005853^cellular_component^eukaryotic translation elongation factor 1 complex`GO:0005634^cellular_component^nucleus`GO:0003677^molecular_function^DNA binding`GO:0003746^molecular_function^translation elongation factor activity	GO:0005853^cellular_component^eukaryotic translation elongation factor 1 complex`GO:0005634^cellular_component^nucleus`GO:0003677^molecular_function^DNA binding`GO:0003746^molecular_function^translation elongation factor activity	GO:0005853^cellular_component^eukaryotic translation elongation factor 1 complex	GO:0005634^cellular_component^nucleus	GO:0003677;GO:0003746	Y	+	FALSE	10.3448	0.383142	9.1954	12.6437	2.29885	6.51341	1.14943	5.74713	10.3448	7.27969	1.53257	1.14943	2.68199	4.5977	3.83142	6.89655	3.83142	7.27969	1.14943	1.14943	100	21.8391	4.5977	OTHER
>TRINITY_DN1513_c0_g1_i7.p1 TRINITY_DN1513_c0_g1~~TRINITY_DN1513_c0_g1_i7.p1 ORF type:5prime_partial len:748 (-),score=173.01 TRINITY_DN1513_c0_g1_i7:51-2294(-)	3.33	470.8	5	5	1	6.69	747	TRINITY_DN1513_c0_g1_i7.p1	TRINITY_DN1513_c0_g1_i7	FP_ACRMI^FP_ACRMI^Q:2291-54,H:530-1280^47.963%ID^E:0^RecName: Full	Fibronectin type III domain-containing protein	TRINITY_DN1513_c0_g1_i7.p1	FP_ACRMI^FP_ACRMI^Q:2-747,H:530-1280^47.963%ID^E:0^RecName: Full=Fibronectin type III domain-containing protein;^Eukaryota; Metazoa; Cnidaria; Anthozoa; Hexacorallia; Scleractinia; Astrocoeniina; Acroporidae; Acropora	.	ExpAA=22.78^PredHel=1^Topology=o623-645i	.	.	GO:0016021^cellular_component^integral component of membrane	GO:0016021^cellular_component^integral component of membrane	GO:0016021^cellular_component^integral component of membrane			Y	FALSE	FALSE	6.82731	0.669344	6.29183	7.22892	3.74833	7.36278	0.937082	4.2838	5.75636	7.36278	0.401606	5.22088	6.69344	3.07898	6.82731	7.09505	6.82731	7.76439	1.87416	3.74833	100	13.5207	9.37082
>TRINITY_DN15325_c0_g1_i2.p1 TRINITY_DN15325_c0_g1~~TRINITY_DN15325_c0_g1_i2.p1 ORF type:complete len:648 (-),score=132.75 TRINITY_DN15325_c0_g1_i2:142-1875(-)	2.58	368.4	6	5	0	6.93	577	TRINITY_DN15325_c0_g1_i2.p1	TRINITY_DN15325_c0_g1_i2	TKT_MOUSE^TKT_MOUSE^Q:2013-145,H:2-619^63.403%ID^E:0^RecName: Full	Transketolase	TRINITY_DN15325_c0_g1_i2.p1	TKT_MOUSE^TKT_MOUSE^Q:3-625,H:2-619^63.403%ID^E:0^RecName: Full=Transketolase;^Eukaryota; Metazoa; Chordata; Craniata; Vertebrata; Euteleostomi; Mammalia; Eutheria; Euarchontoglires; Glires; Rodentia; Myomorpha; Muroidea; Muridae; Murinae; Mus; Mus	.	.	COG0021^Transketolase	KEGG:mmu:21881`KO:K00615	GO:0005789^cellular_component^endoplasmic reticulum membrane`GO:0043231^cellular_component^intracellular membrane-bounded organelle`GO:0043209^cellular_component^myelin sheath`GO:0016604^cellular_component^nuclear body`GO:0016607^cellular_component^nuclear speck`GO:0005654^cellular_component^nucleoplasm`GO:0005777^cellular_component^peroxisome`GO:0030246^molecular_function^carbohydrate binding`GO…	GO:0005789^cellular_component^endoplasmic reticulum membrane`GO:0043231^cellular_component^intracellular membrane-bounded organelle`GO:0043209^cellular_component^myelin sheath`GO:0016604^cellular_component^nuclear body`GO:0016607^cellular_component^nuclear speck`GO:0005654^cellular_component^nucleoplasm`GO:0005777^cellular_component^peroxisome`GO:0030246^molecular_function^carbohydrate binding`GO…	GO:0005789^cellular_component^endoplasmic reticulum membrane	GO:0043231^cellular_component^intracellular membrane-bounded organelle	GO:0043209;GO:0016604;GO:0016607;GO:0005654;GO:0005777;GO:0030246;GO:0048037;GO:0000287;GO:0048029;GO:0042803;GO:0030976;GO:0004802;GO:0046166;GO:0006098;GO:0009052;GO:0040008;GO:0046390;	Y	+	FALSE	10.9185	2.94627	6.23917	5.54593	5.19931	8.14558	2.25303	7.10572	6.41248	6.58579	1.90641	3.29289	4.85269	1.90641	5.026	6.23917	4.85269	7.45234	0.34662	2.77296	100	11.7851	8.31889	OTHER
>TRINITY_DN1535_c0_g1_i10.p1 TRINITY_DN1535_c0_g1~~TRINITY_DN1535_c0_g1_i10.p1 ORF type:5prime_partial len:393 (-),score=68.88 TRINITY_DN1535_c0_g1_i10:273-1451(-)	1.27	367.5	5	4	1	8.93	392	TRINITY_DN1535_c0_g1_i10.p1	TRINITY_DN1535_c0_g1_i10	GELS2_LUMTE^GELS2_LUMTE^Q:1268-276,H:28-364^48.98%ID^E:9.87e-105^RecName: Full	Gelsolin-like protein 2	TRINITY_DN1535_c0_g1_i10.p1	GELS2_LUMTE^GELS2_LUMTE^Q:62-392,H:28-364^48.98%ID^E:4.18e-106^RecName: Full=Gelsolin-like protein 2;^Eukaryota; Metazoa; Lophotrochozoa; Annelida; Clitellata; Oligochaeta; Haplotaxida; Lumbricina; Lumbricidae; Lumbricinae; Lumbricus	.	.	.	.	GO:0005737^cellular_component^cytoplasm`GO:0005856^cellular_component^cytoskeleton`GO:0051015^molecular_function^actin filament binding`GO:0051693^biological_process^actin filament capping	GO:0005737^cellular_component^cytoplasm`GO:0005856^cellular_component^cytoskeleton`GO:0051015^molecular_function^actin filament binding`GO:0051693^biological_process^actin filament capping	GO:0005737^cellular_component^cytoplasm	GO:0005856^cellular_component^cytoskeleton	GO:0051015;GO:0051693	Y	FALSE	FALSE	5.35714	2.04082	6.88776	7.65306	4.08163	6.12245	3.82653	4.33673	9.94898	6.88776	1.02041	3.57143	4.08163	4.08163	4.33673	6.63265	6.37755	6.88776	2.04082	3.82653	100	14.5408	9.94898
>TRINITY_DN15409_c0_g1_i2.p1 TRINITY_DN15409_c0_g1~~TRINITY_DN15409_c0_g1_i2.p1 ORF type:complete len:520 (-),score=105.49 TRINITY_DN15409_c0_g1_i2:208-1767(-)	1.83	385.5	2	2	1	3.28	519	TRINITY_DN15409_c0_g1_i2.p1	TRINITY_DN15409_c0_g1_i2	PDIA3_BOVIN^PDIA3_BOVIN^Q:1713-337,H:26-490^53.404%ID^E:8.17e-157^RecName: Full	Protein disulfide-isomerase A3	TRINITY_DN15409_c0_g1_i2.p1	PDIA3_BOVIN^PDIA3_BOVIN^Q:19-477,H:26-490^53.83%ID^E:3.35e-169^RecName: Full=Protein disulfide-isomerase A3;^Eukaryota; Metazoa; Chordata; Craniata; Vertebrata; Euteleostomi; Mammalia; Eutheria; Laurasiatheria; Artiodactyla; Ruminantia; Pecora; Bovidae; Bovinae; Bos	.	.	COG0526^Thioredoxin	.	GO:0005623^cellular_component^cell`GO:0009986^cellular_component^cell surface`GO:0005783^cellular_component^endoplasmic reticulum`GO:0005788^cellular_component^endoplasmic reticulum lumen`GO:0042470^cellular_component^melanosome`GO:0003756^molecular_function^protein disulfide isomerase activity`GO:0045454^biological_process^cell redox homeostasis`GO:0043065^biological_process^positive regulation …	GO:0005623^cellular_component^cell`GO:0009986^cellular_component^cell surface`GO:0005783^cellular_component^endoplasmic reticulum`GO:0005788^cellular_component^endoplasmic reticulum lumen`GO:0042470^cellular_component^melanosome`GO:0003756^molecular_function^protein disulfide isomerase activity`GO:0045454^biological_process^cell redox homeostasis`GO:0043065^biological_process^positive regulation …	GO:0005623^cellular_component^cell	GO:0009986^cellular_component^cell surface	GO:0005783;GO:0005788;GO:0042470;GO:0003756;GO:0045454;GO:0043065;GO:0006457;GO:0034976	Y	+	FALSE	6.55106	1.34875	7.70713	8.09249	6.93642	5.39499	1.92678	4.62428	12.3314	5.39499	2.31214	3.66089	5.97303	0.963391	3.08285	7.12909	5.00963	7.89981	0.578035	3.08285	100	15.7996	10.5973	SP(Sec/SPI)
>TRINITY_DN15419_c0_g1_i1.p1 TRINITY_DN15419_c0_g1~~TRINITY_DN15419_c0_g1_i1.p1 ORF type:internal len:294 (-),score=40.81 TRINITY_DN15419_c0_g1_i1:3-881(-)	7.05	632.1	4	4	3	15.02	293	TRINITY_DN15419_c0_g1_i1.p1	TRINITY_DN15419_c0_g1_i1	HMCN2_MOUSE^HMCN2_MOUSE^Q:881-78,H:4129-4380^31.502%ID^E:2.33e-25^RecName: Full	Hemicentin-2	TRINITY_DN15419_c0_g1_i1.p1	HMCN2_MOUSE^HMCN2_MOUSE^Q:1-268,H:4129-4380^31.387%ID^E:4.81e-27^RecName: Full=Hemicentin-2;^Eukaryota; Metazoa; Chordata; Craniata; Vertebrata; Euteleostomi; Mammalia; Eutheria; Euarchontoglires; Glires; Rodentia; Myomorpha; Muroidea; Muridae; Murinae; Mus; Mus	.	.	ENOG410ZN3C^von Willebrand factor A domain containing 7	.	GO:0005604^cellular_component^basement membrane`GO:0005938^cellular_component^cell cortex`GO:0030054^cellular_component^cell junction`GO:0032154^cellular_component^cleavage furrow`GO:0062023^cellular_component^collagen-containing extracellular matrix`GO:0031012^cellular_component^extracellular matrix`GO:0005576^cellular_component^extracellular region`GO:0005615^cellular_component^extracellular sp…	GO:0005604^cellular_component^basement membrane`GO:0005938^cellular_component^cell cortex`GO:0030054^cellular_component^cell junction`GO:0032154^cellular_component^cleavage furrow`GO:0062023^cellular_component^collagen-containing extracellular matrix`GO:0031012^cellular_component^extracellular matrix`GO:0005576^cellular_component^extracellular region`GO:0005615^cellular_component^extracellular sp…	GO:0005604^cellular_component^basement membrane	GO:0005938^cellular_component^cell cortex	GO:0030054;GO:0032154;GO:0062023;GO:0031012;GO:0005576;GO:0005615;GO:0005509;GO:0050896	Y	FALSE	FALSE	7.50853	2.04778	6.82594	7.16724	0.682594	11.6041	0	8.19113	4.09556	5.46075	1.70648	4.43686	6.14334	3.41297	2.38908	8.53242	7.16724	9.89761	1.02389	1.70648	100	13.9932	3.41297
>TRINITY_DN1542_c0_g1_i1.p1 TRINITY_DN1542_c0_g1~~TRINITY_DN1542_c0_g1_i1.p1 ORF type:complete len:705 (+),score=80.32 TRINITY_DN1542_c0_g1_i1:95-2209(+)	2.81	502.4	3	2	0	1.85	704	TRINITY_DN1542_c0_g1_i1.p1	TRINITY_DN1542_c0_g1_i1	ADA10_XENLA^ADA10_XENLA^Q:140-2194,H:12-733^36.562%ID^E:2.42e-133^RecName: Full	Disintegrin and metalloproteinase domain-containing protein 10	TRINITY_DN1542_c0_g1_i1.p1	ADA10_XENLA^ADA10_XENLA^Q:10-700,H:6-733^36.671%ID^E:4.88e-147^RecName: Full=Disintegrin and metalloproteinase domain-containing protein 10;^Eukaryota; Metazoa; Chordata; Craniata; Vertebrata; Euteleostomi; Amphibia; Batrachia; Anura; Pipoidea; Pipidae; Xenopodinae; Xenopus; Xenopus	tr|A0A3M6TES2|A0A3M6TES2_9CNID^tr|A0A3M6TES2|A0A3M6TES2_9CNID^Q:2072-1101,H:1-324^89.815%ID^E:0^.^.	ExpAA=22.71^PredHel=1^Topology=o650-672i	.	KEGG:xla:399187`KO:K06704	GO:0009986^cellular_component^cell surface`GO:0005737^cellular_component^cytoplasm`GO:0005794^cellular_component^Golgi apparatus`GO:0005798^cellular_component^Golgi-associated vesicle`GO:0016021^cellular_component^integral component of membrane`GO:0005634^cellular_component^nucleus`GO:0046872^molecular_function^metal ion binding`GO:0004222^molecular_function^metalloendopeptidase activity`GO:00082…	GO:0009986^cellular_component^cell surface`GO:0005737^cellular_component^cytoplasm`GO:0005794^cellular_component^Golgi apparatus`GO:0005798^cellular_component^Golgi-associated vesicle`GO:0016021^cellular_component^integral component of membrane`GO:0005634^cellular_component^nucleus`GO:0046872^molecular_function^metal ion binding`GO:0004222^molecular_function^metalloendopeptidase activity`GO:00082…	GO:0009986^cellular_component^cell surface	GO:0005737^cellular_component^cytoplasm	GO:0005794;GO:0005798;GO:0016021;GO:0005634;GO:0046872;GO:0004222;GO:0008237;GO:0042803;GO:0019901;GO:0017124;GO:0006509;GO:0007162;GO:0007219;GO:0006468	Y	+	FALSE	5.39773	5.25568	6.67614	6.10795	3.97727	7.52841	2.84091	4.54545	9.09091	7.8125	1.13636	4.40341	4.97159	2.98295	4.82955	6.67614	5.39773	4.82955	0.710227	4.82955	100	12.7841	9.51705	SP(Sec/SPI)
>TRINITY_DN1553_c0_g1_i5.p1 TRINITY_DN1553_c0_g1~~TRINITY_DN1553_c0_g1_i5.p1 ORF type:5prime_partial len:1223 (+),score=261.46 TRINITY_DN1553_c0_g1_i5:1-3669(+)	1.23	366.4	2	2	0	1.15	1222	TRINITY_DN1553_c0_g1_i5.p1	TRINITY_DN1553_c0_g1_i5	PTPRS_CHICK^PTPRS_CHICK^Q:160-3657,H:353-1515^34.243%ID^E:8.47e-174^RecName: Full	Receptor-type tyrosine-protein phosphatase S	TRINITY_DN1553_c0_g1_i5.p1	PTPRS_CHICK^PTPRS_CHICK^Q:11-1219,H:317-1515^34.051%ID^E:0^RecName: Full=Receptor-type tyrosine-protein phosphatase S;^Eukaryota; Metazoa; Chordata; Craniata; Vertebrata; Euteleostomi; Archelosauria; Archosauria; Dinosauria; Saurischia; Theropoda; Coelurosauria; Aves; Neognathae; Galloanserae; Galliformes; Phasianidae; Phasianinae; Gallus	.	ExpAA=25.09^PredHel=1^Topology=o560-582i	.	KEGG:gga:396375`KO:K06778	GO:0030424^cellular_component^axon`GO:0030054^cellular_component^cell junction`GO:0030426^cellular_component^growth cone`GO:0005887^cellular_component^integral component of plasma membrane`GO:0099061^cellular_component^integral component of postsynaptic density membrane`GO:0030285^cellular_component^integral component of synaptic vesicle membrane`GO:0043204^cellular_component^perikaryon`GO:000588…	GO:0030424^cellular_component^axon`GO:0030054^cellular_component^cell junction`GO:0030426^cellular_component^growth cone`GO:0005887^cellular_component^integral component of plasma membrane`GO:0099061^cellular_component^integral component of postsynaptic density membrane`GO:0030285^cellular_component^integral component of synaptic vesicle membrane`GO:0043204^cellular_component^perikaryon`GO:000588…	GO:0030424^cellular_component^axon	GO:0030054^cellular_component^cell junction	GO:0030426;GO:0005887;GO:0099061;GO:0030285;GO:0043204;GO:0005886;GO:0043395;GO:0008201;GO:0042803;GO:0004725;GO:0030517;GO:0048681;GO:0048671;GO:0061000;GO:0035335;GO:0006470;GO:0099560;	Y	FALSE	FALSE	6.38298	1.55483	5.48282	6.71031	3.35516	5.97381	2.29133	5.48282	5.97381	6.71031	1.63666	4.09165	5.40098	3.35516	5.89198	7.44681	8.10147	8.6743	1.06383	4.41899	100	12.1931	8.83797
>TRINITY_DN1572_c4_g1_i4.p1 TRINITY_DN1572_c4_g1~~TRINITY_DN1572_c4_g1_i4.p1 ORF type:complete len:956 (-),score=233.11 TRINITY_DN1572_c4_g1_i4:548-3415(-)	1.27	332.9	5	5	2	5.03	955	TRINITY_DN1572_c4_g1_i4.p1	TRINITY_DN1572_c4_g1_i4	E41L2_HUMAN^E41L2_HUMAN^Q:3349-2333,H:218-556^49.706%ID^E:1.23e-101^RecName: Full	Band 4.1-like protein 2	TRINITY_DN1572_c4_g1_i4.p1	E41L2_HUMAN^E41L2_HUMAN^Q:23-361,H:218-556^49.706%ID^E:1.68e-105^RecName: Full=Band 4.1-like protein 2;^Eukaryota; Metazoa; Chordata; Craniata; Vertebrata; Euteleostomi; Mammalia; Eutheria; Euarchontoglires; Primates; Haplorrhini; Catarrhini; Hominidae; Homo	.	.	ENOG410Y7NQ^erythrocyte membrane protein band 4.1-like	KEGG:hsa:2037`KO:K06107	GO:0099738^cellular_component^cell cortex region`GO:0030054^cellular_component^cell junction`GO:0005829^cellular_component^cytosol`GO:0070062^cellular_component^extracellular exosome`GO:0005925^cellular_component^focal adhesion`GO:0005654^cellular_component^nucleoplasm`GO:0005886^cellular_component^plasma membrane`GO:0008091^cellular_component^spectrin`GO:0003779^molecular_function^actin binding`…	GO:0099738^cellular_component^cell cortex region`GO:0030054^cellular_component^cell junction`GO:0005829^cellular_component^cytosol`GO:0070062^cellular_component^extracellular exosome`GO:0005925^cellular_component^focal adhesion`GO:0005654^cellular_component^nucleoplasm`GO:0005886^cellular_component^plasma membrane`GO:0008091^cellular_component^spectrin`GO:0003779^molecular_function^actin binding`…	GO:0099738^cellular_component^cell cortex region	GO:0030054^cellular_component^cell junction	GO:0005829;GO:0070062;GO:0005925;GO:0005654;GO:0005886;GO:0008091;GO:0003779;GO:0042731;GO:0030507;GO:0005198;GO:0031032;GO:0007049;GO:0051301;GO:0030866;GO:1904778;	Y	+	FALSE	5.86387	0.52356	5.65445	9.73822	2.6178	6.59686	2.72251	4.39791	6.38743	6.0733	2.19895	2.93194	7.12042	3.87435	8.58639	7.12042	7.64398	6.38743	1.04712	2.51309	100	15.3927	6.17801	OTHER
>TRINITY_DN1631_c1_g2_i1.p1 TRINITY_DN1631_c1_g2~~TRINITY_DN1631_c1_g2_i1.p1 ORF type:complete len:761 (+),score=198.46 TRINITY_DN1631_c1_g2_i1:126-2408(+)	7.91	465.6	7	6	0	7.11	760	TRINITY_DN1631_c1_g2_i1.p1	TRINITY_DN1631_c1_g2_i1	EST2B_XENLA^EST2B_XENLA^Q:126-2393,H:1-868^33.486%ID^E:4.43e-137^RecName: Full	Extended synaptotagmin-2-B	TRINITY_DN1631_c1_g2_i1.p1	EST2B_XENLA^EST2B_XENLA^Q:1-756,H:1-868^33.753%ID^E:7.96e-145^RecName: Full=Extended synaptotagmin-2-B;^Eukaryota; Metazoa; Chordata; Craniata; Vertebrata; Euteleostomi; Amphibia; Batrachia; Anura; Pipoidea; Pipidae; Xenopodinae; Xenopus; Xenopus	.	ExpAA=53.58^PredHel=1^Topology=i46-68o	.	KEGG:xla:380278	GO:0140268^cellular_component^endoplasmic reticulum-plasma membrane contact site`GO:0031234^cellular_component^extrinsic component of cytoplasmic side of plasma membrane`GO:0016021^cellular_component^integral component of membrane`GO:0031227^cellular_component^intrinsic component of endoplasmic reticulum membrane`GO:0044232^cellular_component^organelle membrane contact site`GO:0005509^molecular_f…	GO:0140268^cellular_component^endoplasmic reticulum-plasma membrane contact site`GO:0031234^cellular_component^extrinsic component of cytoplasmic side of plasma membrane`GO:0016021^cellular_component^integral component of membrane`GO:0031227^cellular_component^intrinsic component of endoplasmic reticulum membrane`GO:0044232^cellular_component^organelle membrane contact site`GO:0005509^molecular_f…	GO:0140268^cellular_component^endoplasmic reticulum-plasma membrane contact site	GO:0031234^cellular_component^extrinsic component of cytoplasmic side of plasma membrane	GO:0016021;GO:0031227;GO:0044232;GO:0005509;GO:0031210;GO:0008429;GO:0035091;GO:0006897;GO:0061817;GO:0006869	Y	+	FALSE	6.57895	0.394737	9.47368	6.31579	4.47368	5.52632	0.789474	6.18421	8.55263	9.60526	2.36842	3.55263	5.92105	2.76316	4.21053	6.71053	5	8.15789	1.71053	1.71053	100	15.7895	7.89474	OTHER
>TRINITY_DN16636_c0_g2_i5.p1 TRINITY_DN16636_c0_g2~~TRINITY_DN16636_c0_g2_i5.p1 ORF type:complete len:460 (+),score=72.38 TRINITY_DN16636_c0_g2_i5:98-1477(+)	2.3	350.2	3	3	0	5.88	459	TRINITY_DN16636_c0_g2_i5.p1	TRINITY_DN16636_c0_g2_i5	CORO6_RAT^CORO6_RAT^Q:98-1468,H:1-461^49.465%ID^E:7.19e-151^RecName: Full	Coronin-6	TRINITY_DN16636_c0_g2_i5.p1	CORO6_RAT^CORO6_RAT^Q:1-457,H:1-461^49.679%ID^E:1.55e-164^RecName: Full=Coronin-6;^Eukaryota; Metazoa; Chordata; Craniata; Vertebrata; Euteleostomi; Mammalia; Eutheria; Euarchontoglires; Glires; Rodentia; Myomorpha; Muroidea; Muridae; Murinae; Rattus	.	.	ENOG410XQAD^Coronin, actin binding protein	KEGG:rno:245982`KO:K13886	GO:0051015^molecular_function^actin filament binding`GO:0007015^biological_process^actin filament organization`GO:0016477^biological_process^cell migration	GO:0051015^molecular_function^actin filament binding`GO:0007015^biological_process^actin filament organization`GO:0016477^biological_process^cell migration	GO:0051015^molecular_function^actin filament binding	GO:0007015^biological_process^actin filament organization	GO:0016477;	Y	+	FALSE	8.061	2.17865	5.66449	7.40741	3.48584	6.97168	2.17865	6.75381	8.93246	6.53595	2.83224	5.22876	5.01089	2.39651	3.7037	6.75381	4.13943	7.18954	2.17865	2.39651	100	13.0719	8.061	OTHER
>TRINITY_DN1664_c0_g1_i2.p1 TRINITY_DN1664_c0_g1~~TRINITY_DN1664_c0_g1_i2.p1 ORF type:5prime_partial len:792 (-),score=111.55 TRINITY_DN1664_c0_g1_i2:138-2513(-)	1.18	389	3	3	0	3.29	791	TRINITY_DN1664_c0_g1_i2.p1	TRINITY_DN1664_c0_g1_i2	EDIL3_MOUSE^EDIL3_MOUSE^Q:1139-324,H:199-478^38.621%ID^E:7.46e-46^RecName: Full	EGF-like repeat and discoidin I-like domain-containing protein 3	TRINITY_DN1664_c0_g1_i2.p1	EDIL3_MOUSE^EDIL3_MOUSE^Q:459-730,H:199-478^38.621%ID^E:4.1e-46^RecName: Full=EGF-like repeat and discoidin I-like domain-containing protein 3;^Eukaryota; Metazoa; Chordata; Craniata; Vertebrata; Euteleostomi; Mammalia; Eutheria; Euarchontoglires; Glires; Rodentia; Myomorpha; Muroidea; Muridae; Murinae; Mus; Mus	tr|A0A3M6V680|A0A3M6V680_9CNID^tr|A0A3M6V680|A0A3M6V680_9CNID^Q:1850-15,H:63-681^68.174%ID^E:0^.^.	.	ENOG41114BV^Milk fat globule-EGF factor 8 protein	KEGG:mmu:13612	GO:0005576^cellular_component^extracellular region`GO:0005509^molecular_function^calcium ion binding`GO:0005178^molecular_function^integrin binding`GO:0007155^biological_process^cell adhesion`GO:0007275^biological_process^multicellular organism development`GO:0010811^biological_process^positive regulation of cell-substrate adhesion	GO:0005576^cellular_component^extracellular region`GO:0005509^molecular_function^calcium ion binding`GO:0005178^molecular_function^integrin binding`GO:0007155^biological_process^cell adhesion`GO:0007275^biological_process^multicellular organism development`GO:0010811^biological_process^positive regulation of cell-substrate adhesion	GO:0005576^cellular_component^extracellular region	GO:0005509^molecular_function^calcium ion binding	GO:0005178;GO:0007155;GO:0007275;GO:0010811	Y	FALSE	FALSE	7.71176	2.02276	3.66625	4.17193	3.53982	9.22882	4.29836	4.17193	3.91909	5.43616	1.64349	5.18331	4.42478	4.80405	7.20607	8.34387	5.689	6.44753	3.53982	4.5512	100	7.83818	11.6308
>TRINITY_DN1796_c0_g1_i6.p1 TRINITY_DN1796_c0_g1~~TRINITY_DN1796_c0_g1_i6.p1 ORF type:complete len:649 (-),score=153.47 TRINITY_DN1796_c0_g1_i6:169-2115(-)	7.39	484	5	3	0	4.78	648	TRINITY_DN1796_c0_g1_i6.p1	TRINITY_DN1796_c0_g1_i6	ACE_RAT^ACE_RAT^Q:2028-271,H:47-637^49.916%ID^E:0^RecName: Full	Angiotensin-converting enzyme	TRINITY_DN1796_c0_g1_i6.p1	ACE_RAT^ACE_RAT^Q:30-615,H:47-637^49.916%ID^E:0^RecName: Full=Angiotensin-converting enzyme;^Eukaryota; Metazoa; Chordata; Craniata; Vertebrata; Euteleostomi; Mammalia; Eutheria; Euarchontoglires; Glires; Rodentia; Myomorpha; Muroidea; Muridae; Murinae; Rattus	.	ExpAA=27.45^PredHel=1^Topology=o620-642i	ENOG410XPJ3^Angiotensin I converting enzyme peptidyl-dipeptidase A	KEGG:rno:24310`KO:K01283	GO:0009925^cellular_component^basal plasma membrane`GO:0031526^cellular_component^brush border membrane`GO:0005737^cellular_component^cytoplasm`GO:0005768^cellular_component^endosome`GO:0009897^cellular_component^external side of plasma membrane`GO:0070062^cellular_component^extracellular exosome`GO:0005615^cellular_component^extracellular space`GO:0016021^cellular_component^integral component of…	GO:0009925^cellular_component^basal plasma membrane`GO:0031526^cellular_component^brush border membrane`GO:0005737^cellular_component^cytoplasm`GO:0005768^cellular_component^endosome`GO:0009897^cellular_component^external side of plasma membrane`GO:0070062^cellular_component^extracellular exosome`GO:0005615^cellular_component^extracellular space`GO:0016021^cellular_component^integral component of…	GO:0009925^cellular_component^basal plasma membrane	GO:0031526^cellular_component^brush border membrane	GO:0005737;GO:0005768;GO:0009897;GO:0070062;GO:0005615;GO:0016021;GO:0005764;GO:0005886;GO:0097225;GO:0031982;GO:0003779;GO:0031711;GO:0004180;GO:0031404;GO:0008239;GO:0008144;GO:0004175;GO:0008238;GO:0070573;GO:0008237;GO:0051019;GO:0031434;GO:0008233;GO:0008241;GO:0008240;GO:0008270;GO:0007568;GO:0050435;GO:0060978;GO:0031100;GO:0050482;GO:0010815;GO:0007420;GO:0071838;GO:1904045;GO:0071333;GO:…	Y	+	FALSE	7.71605	1.23457	6.17284	6.17284	4.16667	5.40123	2.31481	3.54938	8.95062	9.72222	2.16049	3.54938	4.62963	4.01235	4.93827	6.17284	5.24691	6.17284	2.9321	4.78395	100	12.3457	11.8827	SP(Sec/SPI)
>TRINITY_DN19465_c0_g1_i2.p1 TRINITY_DN19465_c0_g1~~TRINITY_DN19465_c0_g1_i2.p1 ORF type:complete len:247 (-),score=54.70 TRINITY_DN19465_c0_g1_i2:321-956(-)	1.4	351.6	4	1	0	3.79	211	TRINITY_DN19465_c0_g1_i2.p1	TRINITY_DN19465_c0_g1_i2	RL13_DANRE^RL13_DANRE^Q:956-372,H:1-195^68.205%ID^E:1.27e-74^RecName: Full	60S ribosomal protein L13	TRINITY_DN19465_c0_g1_i2.p1	RL13_DANRE^RL13_DANRE^Q:1-211,H:1-211^68.246%ID^E:4.52e-93^RecName: Full=60S ribosomal protein L13;^Eukaryota; Metazoa; Chordata; Craniata; Vertebrata; Euteleostomi; Actinopterygii; Neopterygii; Teleostei; Ostariophysi; Cypriniformes; Cyprinidae; Danio	.	.	COG4352^cytoplasmic translation	KEGG:dre:378961`KO:K02873	GO:0022625^cellular_component^cytosolic large ribosomal subunit`GO:0003735^molecular_function^structural constituent of ribosome`GO:0051726^biological_process^regulation of cell cycle`GO:0006412^biological_process^translation	GO:0022625^cellular_component^cytosolic large ribosomal subunit`GO:0003735^molecular_function^structural constituent of ribosome`GO:0051726^biological_process^regulation of cell cycle`GO:0006412^biological_process^translation	GO:0022625^cellular_component^cytosolic large ribosomal subunit	GO:0003735^molecular_function^structural constituent of ribosome	GO:0051726;GO:0006412	Y	+	FALSE	11.3744	0.473934	2.36967	5.21327	2.8436	5.21327	1.89573	5.6872	13.7441	6.16114	1.4218	4.2654	6.63507	5.21327	11.8483	2.8436	4.73934	5.6872	0.947867	1.4218	100	7.58294	5.21327	OTHER
>TRINITY_DN19489_c0_g3_i1.p1 TRINITY_DN19489_c0_g3~~TRINITY_DN19489_c0_g3_i1.p1 ORF type:5prime_partial len:499 (+),score=140.53 TRINITY_DN19489_c0_g3_i1:1-1497(+)	4.42	401	5	4	2	8.03	498	TRINITY_DN19489_c0_g3_i1.p1	TRINITY_DN19489_c0_g3_i1	SNX2_HUMAN^SNX2_HUMAN^Q:346-1494,H:138-519^61.88%ID^E:1.03e-160^RecName: Full	Sorting nexin-2	TRINITY_DN19489_c0_g3_i1.p1	SNX2_HUMAN^SNX2_HUMAN^Q:27-498,H:54-519^55.882%ID^E:6.8e-178^RecName: Full=Sorting nexin-2;^Eukaryota; Metazoa; Chordata; Craniata; Vertebrata; Euteleostomi; Mammalia; Eutheria; Euarchontoglires; Primates; Haplorrhini; Catarrhini; Hominidae; Homo	.	.	COG5391^sorting nexin	KEGG:hsa:6643`KO:K17917	GO:0005737^cellular_component^cytoplasm`GO:0005829^cellular_component^cytosol`GO:0031901^cellular_component^early endosome membrane`GO:0005768^cellular_component^endosome`GO:0010008^cellular_component^endosome membrane`GO:0030027^cellular_component^lamellipodium`GO:0005764^cellular_component^lysosome`GO:0016020^cellular_component^membrane`GO:0032991^cellular_component^protein-containing complex`G…	GO:0005737^cellular_component^cytoplasm`GO:0005829^cellular_component^cytosol`GO:0031901^cellular_component^early endosome membrane`GO:0005768^cellular_component^endosome`GO:0010008^cellular_component^endosome membrane`GO:0030027^cellular_component^lamellipodium`GO:0005764^cellular_component^lysosome`GO:0016020^cellular_component^membrane`GO:0032991^cellular_component^protein-containing complex`G…	GO:0005737^cellular_component^cytoplasm	GO:0005829^cellular_component^cytosol	GO:0031901;GO:0005768;GO:0010008;GO:0030027;GO:0005764;GO:0016020;GO:0032991;GO:0030904;GO:0030905;GO:0045296;GO:0005154;GO:0005158;GO:1990460;GO:0035091;GO:0046982;GO:0042803;GO:1990459;GO:0034498;GO:0006897;GO:0006886;GO:0072673;GO:0051259;GO:0042147;	Y	FALSE	FALSE	8.03213	0.60241	6.62651	13.8554	4.21687	4.61847	2.00803	3.61446	9.03614	7.83133	2.40964	3.21285	4.41767	5.02008	4.41767	6.4257	5.62249	5.62249	0.803213	1.60643	100	20.4819	6.62651
>TRINITY_DN195_c0_g1_i2.p1 TRINITY_DN195_c0_g1~~TRINITY_DN195_c0_g1_i2.p1 ORF type:5prime_partial len:543 (-),score=82.06 TRINITY_DN195_c0_g1_i2:2078-3706(-)	2.08	355.8	5	4	0	4.43	542	TRINITY_DN195_c0_g1_i2.p1	TRINITY_DN195_c0_g1_i2	SRC42_DROME^SRC42_DROME^Q:3592-2084,H:1-515^56.977%ID^E:0^RecName: Full	Tyrosine-protein kinase Src42A	TRINITY_DN195_c0_g1_i2.p1	SRC42_DROME^SRC42_DROME^Q:39-541,H:1-515^56.977%ID^E:0^RecName: Full=Tyrosine-protein kinase Src42A;^Eukaryota; Metazoa; Ecdysozoa; Arthropoda; Hexapoda; Insecta; Pterygota; Neoptera; Holometabola; Diptera; Brachycera; Muscomorpha; Ephydroidea; Drosophilidae; Drosophila; Sophophora	.	.	COG0515^Serine Threonine protein kinase	KEGG:dme:Dmel_CG44128`KO:K08892	GO:0005912^cellular_component^adherens junction`GO:0005737^cellular_component^cytoplasm`GO:0005829^cellular_component^cytosol`GO:0031234^cellular_component^extrinsic component of cytoplasmic side of plasma membrane`GO:0005886^cellular_component^plasma membrane`GO:0005524^molecular_function^ATP binding`GO:0004715^molecular_function^non-membrane spanning protein tyrosine kinase activity`GO:0004713^…	GO:0005912^cellular_component^adherens junction`GO:0005737^cellular_component^cytoplasm`GO:0005829^cellular_component^cytosol`GO:0031234^cellular_component^extrinsic component of cytoplasmic side of plasma membrane`GO:0005886^cellular_component^plasma membrane`GO:0005524^molecular_function^ATP binding`GO:0004715^molecular_function^non-membrane spanning protein tyrosine kinase activity`GO:0004713^…	GO:0005912^cellular_component^adherens junction	GO:0005737^cellular_component^cytoplasm	GO:0005829;GO:0031234;GO:0005886;GO:0005524;GO:0004715;GO:0004713;GO:0005102;GO:0051017;GO:0034332;GO:0043277;GO:0007411;GO:0030154;GO:0016477;GO:0007623;GO:0048749;GO:0042742;GO:0007391;GO:0007395;GO:0090136;GO:0046529;GO:0007476;GO:0036335;GO:0042059;GO:0045886;GO:0007424;GO:0038083;GO:0018108;GO:0045742;GO:0070374;GO:0045874;GO:0006468;GO:0042127;GO:0048167;GO:0007435;GO:0007169;	Y	FALSE	FALSE	6.64207	1.84502	6.08856	7.93358	3.69004	6.45756	2.21402	4.05904	7.38007	10.1476	1.84502	4.05904	6.08856	3.32103	4.61255	6.27306	5.16605	5.90406	2.02952	4.24354	100	14.0221	9.9631
>TRINITY_DN2075_c0_g1_i1.p1 TRINITY_DN2075_c0_g1~~TRINITY_DN2075_c0_g1_i1.p1 ORF type:internal len:176 (-),score=20.43 TRINITY_DN2075_c0_g1_i1:1-525(-)	2.77	401.5	2	2	0	10.86	175	TRINITY_DN2075_c0_g1_i1.p1	TRINITY_DN2075_c0_g1_i1	no blast hit	no blast hit	TRINITY_DN2075_c0_g1_i1.p1	.	tr|A0A3M6TDU0|A0A3M6TDU0_9CNID^tr|A0A3M6TDU0|A0A3M6TDU0_9CNID^Q:195-2252,H:469-1049^48.692%ID^E:2.47e-151^.^.	.	.	.	.	.	.			Y	FALSE	FALSE	9.71429	1.14286	7.42857	10.8571	3.42857	5.14286	1.14286	1.71429	9.14286	12.5714	1.71429	2.85714	2.28571	4	5.71429	8.57143	6.28571	4	0.571429	1.71429	100	18.2857	5.71429
>TRINITY_DN21208_c0_g1_i1.p1 TRINITY_DN21208_c0_g1~~TRINITY_DN21208_c0_g1_i1.p1 ORF type:complete len:786 (+),score=168.80 TRINITY_DN21208_c0_g1_i1:194-2551(+)	4.48	457.5	9	5	2	4.97	785	TRINITY_DN21208_c0_g1_i1.p1	TRINITY_DN21208_c0_g1_i1	ELP_ACRMI^ELP_ACRMI^Q:32-2548,H:289-1124^39.195%ID^E:3.22e-164^RecName: Full	EGF and laminin G domain-containing protein {ECO:0000303|PubMed:23765379}	TRINITY_DN21208_c0_g1_i1.p1	ELP_ACRMI^ELP_ACRMI^Q:1-785,H:343-1124^41.082%ID^E:4.3e-174^RecName: Full=EGF and laminin G domain-containing protein {ECO:0000303|PubMed:23765379};^Eukaryota; Metazoa; Cnidaria; Anthozoa; Hexacorallia; Scleractinia; Astrocoeniina; Acroporidae; Acropora	tr|A0A3M6UMC6|A0A3M6UMC6_9CNID^tr|A0A3M6UMC6|A0A3M6UMC6_9CNID^Q:111-4,H:111-146^94.444%ID^E:1.93e-17^.^.	ExpAA=23.06^PredHel=1^Topology=o720-742i	.	.	GO:0016021^cellular_component^integral component of membrane	GO:0016021^cellular_component^integral component of membrane	GO:0016021^cellular_component^integral component of membrane			Y	+	FALSE	5.47771	3.82166	7.64331	4.71338	3.94904	7.7707	1.91083	4.84076	7.13376	6.49682	1.78344	5.47771	5.35032	3.05732	4.07643	6.6242	6.36943	7.89809	1.65605	3.94904	100	12.3567	9.55414	OTHER
>TRINITY_DN21440_c0_g1_i2.p1 TRINITY_DN21440_c0_g1~~TRINITY_DN21440_c0_g1_i2.p1 ORF type:5prime_partial len:336 (+),score=70.55 TRINITY_DN21440_c0_g1_i2:1-1008(+)	4.88	574.9	2	2	1	6.87	335	TRINITY_DN21440_c0_g1_i2.p1	TRINITY_DN21440_c0_g1_i2	CAHZ_DANRE^CAHZ_DANRE^Q:163-888,H:16-260^41.935%ID^E:2.49e-55^RecName: Full	Carbonic anhydrase	TRINITY_DN21440_c0_g1_i2.p1	CAHZ_DANRE^CAHZ_DANRE^Q:55-296,H:16-260^41.935%ID^E:2.57e-56^RecName: Full=Carbonic anhydrase;^Eukaryota; Metazoa; Chordata; Craniata; Vertebrata; Euteleostomi; Actinopterygii; Neopterygii; Teleostei; Ostariophysi; Cypriniformes; Cyprinidae; Danio	.	ExpAA=22.45^PredHel=1^Topology=o312-334i	COG3338^Carbonic anhydrase	KEGG:dre:30331`KO:K18245	GO:0004089^molecular_function^carbonate dehydratase activity`GO:0008270^molecular_function^zinc ion binding`GO:0015670^biological_process^carbon dioxide transport`GO:0042539^biological_process^hypotonic salinity response	GO:0004089^molecular_function^carbonate dehydratase activity`GO:0008270^molecular_function^zinc ion binding`GO:0015670^biological_process^carbon dioxide transport`GO:0042539^biological_process^hypotonic salinity response	GO:0004089^molecular_function^carbonate dehydratase activity	GO:0008270^molecular_function^zinc ion binding	GO:0015670;GO:0042539	Y	FALSE	FALSE	8.65672	1.49254	3.58209	3.8806	4.47761	6.56716	3.28358	4.1791	6.56716	10.1493	2.68657	5.97015	5.37313	3.58209	2.68657	7.46269	8.35821	6.26866	1.49254	3.28358	100	7.46269	9.25373
>TRINITY_DN2177_c0_g1_i1.p1 TRINITY_DN2177_c0_g1~~TRINITY_DN2177_c0_g1_i1.p1 ORF type:5prime_partial len:644 (-),score=137.37 TRINITY_DN2177_c0_g1_i1:1389-3320(-)	2.54	435.1	2	2	1	4.51	643	TRINITY_DN2177_c0_g1_i1.p1	TRINITY_DN2177_c0_g1_i1	ICA69_MOUSE^ICA69_MOUSE^Q:3212-2463,H:20-269^60.4%ID^E:6.93e-99^RecName: Full	Islet cell autoantigen 1	TRINITY_DN2177_c0_g1_i1.p1	ICA69_MOUSE^ICA69_MOUSE^Q:37-286,H:20-269^60.4%ID^E:6.14e-104^RecName: Full=Islet cell autoantigen 1;^Eukaryota; Metazoa; Chordata; Craniata; Vertebrata; Euteleostomi; Mammalia; Eutheria; Euarchontoglires; Glires; Rodentia; Myomorpha; Muroidea; Muridae; Murinae; Mus; Mus	.	.	ENOG410YJKW^Islet cell autoantigen	KEGG:mmu:15893`KO:K19863	GO:0030054^cellular_component^cell junction`GO:0005829^cellular_component^cytosol`GO:0030425^cellular_component^dendrite`GO:0000139^cellular_component^Golgi membrane`GO:0005795^cellular_component^Golgi stack`GO:0043231^cellular_component^intracellular membrane-bounded organelle`GO:0048471^cellular_component^perinuclear region of cytoplasm`GO:0030667^cellular_component^secretory granule membrane`G…	GO:0030054^cellular_component^cell junction`GO:0005829^cellular_component^cytosol`GO:0030425^cellular_component^dendrite`GO:0000139^cellular_component^Golgi membrane`GO:0005795^cellular_component^Golgi stack`GO:0043231^cellular_component^intracellular membrane-bounded organelle`GO:0048471^cellular_component^perinuclear region of cytoplasm`GO:0030667^cellular_component^secretory granule membrane`G…	GO:0030054^cellular_component^cell junction	GO:0005829^cellular_component^cytosol	GO:0030425;GO:0000139;GO:0005795;GO:0043231;GO:0048471;GO:0030667;GO:0030672;GO:0019904;GO:0006836;GO:0050796;GO:0046928;GO:0043254	Y	FALSE	FALSE	8.08709	0.466563	8.39813	7.46501	3.57698	6.84292	1.39969	2.02177	7.46501	9.17574	3.26594	3.88802	5.59876	5.59876	4.66563	9.79782	5.59876	3.11042	0.777605	2.79938	100	15.8631	7.15397
>TRINITY_DN21906_c1_g1_i1.p1 TRINITY_DN21906_c1_g1~~TRINITY_DN21906_c1_g1_i1.p1 ORF type:internal len:300 (-),score=46.19 TRINITY_DN21906_c1_g1_i1:1-897(-)	14.71	608.3	14	5	0	13.04	299	TRINITY_DN21906_c1_g1_i1.p1	TRINITY_DN21906_c1_g1_i1	VWDE_MOUSE^VWDE_MOUSE^Q:888-7,H:213-503^25.078%ID^E:7.94e-13^RecName: Full	von Willebrand factor D and EGF domain-containing protein	TRINITY_DN21906_c1_g1_i1.p1	VWDE_MOUSE^VWDE_MOUSE^Q:4-297,H:213-503^25.078%ID^E:1.86e-16^RecName: Full=von Willebrand factor D and EGF domain-containing protein;^Eukaryota; Metazoa; Chordata; Craniata; Vertebrata; Euteleostomi; Mammalia; Eutheria; Euarchontoglires; Glires; Rodentia; Myomorpha; Muroidea; Muridae; Murinae; Mus; Mus	.	.	ENOG410XP6K^Notch ligand involved in the mediation of Notch signaling (By similarity)	.	GO:0005576^cellular_component^extracellular region	GO:0005576^cellular_component^extracellular region	GO:0005576^cellular_component^extracellular region			Y	FALSE	FALSE	3.67893	2.67559	8.69565	5.68562	3.01003	7.02341	1.00334	7.35786	10.7023	3.67893	0.668896	3.67893	4.34783	1.67224	4.68227	9.0301	8.02676	10.0334	1.33779	3.01003	100	14.3813	7.35786
>TRINITY_DN2233_c0_g1_i4.p1 TRINITY_DN2233_c0_g1~~TRINITY_DN2233_c0_g1_i4.p1 ORF type:complete len:528 (-),score=77.63 TRINITY_DN2233_c0_g1_i4:353-1936(-)	1.16	348.9	2	2	0	2.47	527	TRINITY_DN2233_c0_g1_i4.p1	TRINITY_DN2233_c0_g1_i4	PDLI5_HUMAN^PDLI5_HUMAN^Q:1321-362,H:278-591^33.824%ID^E:5.51e-54^RecName: Full	PDZ and LIM domain protein 5	TRINITY_DN2233_c0_g1_i4.p1	PDLI5_RAT^PDLI5_RAT^Q:1-525,H:61-586^30.051%ID^E:5.15e-62^RecName: Full=PDZ and LIM domain protein 5;^Eukaryota; Metazoa; Chordata; Craniata; Vertebrata; Euteleostomi; Mammalia; Eutheria; Euarchontoglires; Glires; Rodentia; Myomorpha; Muroidea; Muridae; Murinae; Rattus	.	.	ENOG410XRD4^PDZ and LIM domain	KEGG:rno:64353`KO:K19867	GO:0015629^cellular_component^actin cytoskeleton`GO:0042995^cellular_component^cell projection`GO:0005829^cellular_component^cytosol`GO:0031941^cellular_component^filamentous actin`GO:0016020^cellular_component^membrane`GO:0014069^cellular_component^postsynaptic density`GO:0098793^cellular_component^presynapse`GO:0001725^cellular_component^stress fiber`GO:0030018^cellular_component^Z disc`GO:0003…	GO:0042995^cellular_component^cell projection`GO:0005829^cellular_component^cytosol`GO:0031941^cellular_component^filamentous actin`GO:0016020^cellular_component^membrane`GO:0014069^cellular_component^postsynaptic density`GO:0098793^cellular_component^presynapse`GO:0001725^cellular_component^stress fiber`GO:0030018^cellular_component^Z disc`GO:0003779^molecular_function^actin binding`GO:0042805^m…	GO:0042995^cellular_component^cell projection	GO:0005829^cellular_component^cytosol	GO:0031941;GO:0016020;GO:0014069;GO:0098793;GO:0001725;GO:0030018;GO:0003779;GO:0042805;GO:0046872;GO:0051371;GO:0005080;GO:0047485;GO:0030159;GO:0030036;GO:0061049;GO:0007507;GO:0061061;GO:0061001;GO:0051963;	Y	+	FALSE	7.96964	3.98482	4.36433	5.6926	4.17457	7.21063	3.79507	2.65655	6.45161	3.03605	2.27704	3.03605	14.4213	5.12334	4.74383	6.26186	4.93359	6.45161	0.759013	2.65655	100	10.0569	7.59013	OTHER
>TRINITY_DN22734_c0_g1_i4.p1 TRINITY_DN22734_c0_g1~~TRINITY_DN22734_c0_g1_i4.p1 ORF type:5prime_partial len:334 (+),score=35.84 TRINITY_DN22734_c0_g1_i4:3-1004(+)	4.51	385.2	3	3	2	10.81	333	TRINITY_DN22734_c0_g1_i4.p1	TRINITY_DN22734_c0_g1_i4	FGF20_HUMAN^FGF20_HUMAN^Q:2034-1747,H:65-160^38.542%ID^E:2.31e-15^RecName: Full	Fibroblast growth factor 20	TRINITY_DN22734_c0_g1_i4.p1	.	.	.	ENOG4111IPH^fibroblast growth factor receptor signaling pathway	KEGG:hsa:26281`KO:K04358	GO:0005576^cellular_component^extracellular region`GO:0005104^molecular_function^fibroblast growth factor receptor binding`GO:0008083^molecular_function^growth factor activity`GO:0043395^molecular_function^heparan sulfate proteoglycan binding`GO:0090722^molecular_function^receptor-receptor interaction`GO:0005102^molecular_function^signaling receptor binding`GO:0007267^biological_process^cell-cell…	.	.			Y	FALSE	FALSE	3.003	10.8108	6.90691	4.5045	3.6036	8.40841	0.600601	4.5045	7.50751	5.40541	0.900901	3.6036	5.40541	5.40541	5.40541	6.90691	7.20721	6.30631	0.600601	3.003	100	11.4114	7.20721
>TRINITY_DN22857_c0_g3_i2.p2 TRINITY_DN22857_c0_g3~~TRINITY_DN22857_c0_g3_i2.p2 ORF type:5prime_partial len:123 (-),score=20.70 TRINITY_DN22857_c0_g3_i2:101-469(-)	5.38	574.8	3	1	0	9.84	122	TRINITY_DN22857_c0_g3_i2.p2	TRINITY_DN22857_c0_g3_i2	no blast hit	no blast hit	TRINITY_DN22857_c0_g3_i2.p2	.	.	ExpAA=20.70^PredHel=1^Topology=i98-120o	.	.	.	.	.			Y	FALSE	FALSE	17.2131	11.4754	7.37705	5.7377	2.45902	8.19672	0.819672	3.27869	9.83607	6.55738	0.819672	2.45902	0.819672	1.63934	0.819672	6.55738	4.91803	5.7377	1.63934	1.63934	100	13.1148	5.7377
>TRINITY_DN2314_c1_g1_i2.p1 TRINITY_DN2314_c1_g1~~TRINITY_DN2314_c1_g1_i2.p1 ORF type:3prime_partial len:498 (+),score=93.97 TRINITY_DN2314_c1_g1_i2:255-1745(+)	2.58	416.8	5	3	0	5.43	497	TRINITY_DN2314_c1_g1_i2.p1	TRINITY_DN2314_c1_g1_i2	CTL4_XENLA^CTL4_XENLA^Q:144-1712,H:4-534^38.202%ID^E:2.13e-119^RecName: Full	Choline transporter-like protein 4	TRINITY_DN2314_c1_g1_i2.p1	CTL4_XENLA^CTL4_XENLA^Q:2-497,H:42-545^38.264%ID^E:2.15e-114^RecName: Full=Choline transporter-like protein 4;^Eukaryota; Metazoa; Chordata; Craniata; Vertebrata; Euteleostomi; Amphibia; Batrachia; Anura; Pipoidea; Pipidae; Xenopodinae; Xenopus; Xenopus	.	ExpAA=138.42^PredHel=6^Topology=i178-200o205-227i259-281o309-331i394-416o443-465i	.	KEGG:xla:444429`KO:K15377	GO:0016324^cellular_component^apical plasma membrane`GO:0016021^cellular_component^integral component of membrane`GO:0015220^molecular_function^choline transmembrane transporter activity`GO:0008292^biological_process^acetylcholine biosynthetic process`GO:0061526^biological_process^acetylcholine secretion`GO:0015871^biological_process^choline transport`GO:0035675^biological_process^neuromast hair …	GO:0016324^cellular_component^apical plasma membrane`GO:0016021^cellular_component^integral component of membrane`GO:0015220^molecular_function^choline transmembrane transporter activity`GO:0008292^biological_process^acetylcholine biosynthetic process`GO:0061526^biological_process^acetylcholine secretion`GO:0015871^biological_process^choline transport`GO:0035675^biological_process^neuromast hair …	GO:0016324^cellular_component^apical plasma membrane	GO:0016021^cellular_component^integral component of membrane	GO:0015220;GO:0008292;GO:0061526;GO:0015871;GO:0035675;GO:0032475;GO:0030307;	Y	FALSE	+	6.43863	3.82294	5.4326	3.21932	6.23742	6.84105	1.20724	8.04829	6.23742	11.2676	2.21328	2.8169	4.42656	2.61569	2.21328	5.6338	6.03622	8.4507	2.41449	4.42656	100	8.65191	13.0785
>TRINITY_DN2336_c0_g1_i15.p2 TRINITY_DN2336_c0_g1~~TRINITY_DN2336_c0_g1_i15.p2 ORF type:5prime_partial len:447 (-),score=82.12 TRINITY_DN2336_c0_g1_i15:1351-2691(-)	2.84	422.3	14	7	2	10.54	446	TRINITY_DN2336_c0_g1_i15.p2	TRINITY_DN2336_c0_g1_i15	GP2_CANLF^GP2_CANLF^Q:2553-2185,H:38-156^51.613%ID^E:1.65e-28^RecName: Full	Pancreatic secretory granule membrane major glycoprotein GP2	TRINITY_DN2336_c0_g1_i15.p2	GP2_CANLF^GP2_CANLF^Q:47-172,H:38-159^51.181%ID^E:3.48e-30^RecName: Full=Pancreatic secretory granule membrane major glycoprotein GP2;^Eukaryota; Metazoa; Chordata; Craniata; Vertebrata; Euteleostomi; Mammalia; Eutheria; Laurasiatheria; Carnivora; Caniformia; Canidae; Canis	.	.	ENOG410YDU6^antigen transcytosis by M cells in mucosal-associated lymphoid tissue	.	GO:0031225^cellular_component^anchored component of membrane`GO:0005576^cellular_component^extracellular region`GO:0005886^cellular_component^plasma membrane	GO:0031225^cellular_component^anchored component of membrane`GO:0005576^cellular_component^extracellular region`GO:0005886^cellular_component^plasma membrane	GO:0031225^cellular_component^anchored component of membrane	GO:0005576^cellular_component^extracellular region	GO:0005886;	Y	FALSE	FALSE	5.38117	6.05381	6.27803	4.4843	2.9148	8.96861	2.24215	1.79372	2.24215	4.70852	1.56951	6.27803	9.64126	4.93274	10.3139	2.24215	7.3991	7.17489	2.01794	3.36323	100	10.7623	8.29596
>TRINITY_DN2342_c0_g1_i3.p1 TRINITY_DN2342_c0_g1~~TRINITY_DN2342_c0_g1_i3.p1 ORF type:complete len:231 (+),score=34.09 TRINITY_DN2342_c0_g1_i3:30-695(+)	5.49	398.4	5	5	1	18.55	221	TRINITY_DN2342_c0_g1_i3.p1	TRINITY_DN2342_c0_g1_i3	GST1_ASCSU^GST1_ASCSU^Q:30-674,H:1-204^35.321%ID^E:8.57e-30^RecName: Full	Glutathione S-transferase 1	TRINITY_DN2342_c0_g1_i3.p1	GST1_ASCSU^GST1_ASCSU^Q:1-215,H:1-204^35.321%ID^E:1.21e-30^RecName: Full=Glutathione S-transferase 1;^Eukaryota; Metazoa; Ecdysozoa; Nematoda; Chromadorea; Rhabditida; Spirurina; Ascaridomorpha; Ascaridoidea; Ascarididae; Ascaris	tr|A0A3M6UHR6|A0A3M6UHR6_9CNID^tr|A0A3M6UHR6|A0A3M6UHR6_9CNID^Q:452-132,H:1-103^79.439%ID^E:5.41e-52^.^.	.	.	.	GO:0005903^cellular_component^brush border`GO:0005737^cellular_component^cytoplasm`GO:0004602^molecular_function^glutathione peroxidase activity`GO:0004364^molecular_function^glutathione transferase activity`GO:0098869^biological_process^cellular oxidant detoxification`GO:0055114^biological_process^oxidation-reduction process	GO:0005903^cellular_component^brush border`GO:0005737^cellular_component^cytoplasm`GO:0004602^molecular_function^glutathione peroxidase activity`GO:0004364^molecular_function^glutathione transferase activity`GO:0098869^biological_process^cellular oxidant detoxification`GO:0055114^biological_process^oxidation-reduction process	GO:0005903^cellular_component^brush border	GO:0005737^cellular_component^cytoplasm	GO:0004602;GO:0004364;GO:0098869;GO:0055114	Y	+	FALSE	6.33484	0.904977	5.88235	6.33484	6.33484	8.1448	1.35747	5.88235	9.04977	7.69231	3.16742	4.97738	4.97738	4.0724	3.61991	5.42986	2.26244	7.23982	1.35747	4.97738	100	12.2172	12.6697	OTHER
>TRINITY_DN2418_c0_g1_i2.p1 TRINITY_DN2418_c0_g1~~TRINITY_DN2418_c0_g1_i2.p1 ORF type:complete len:142 (+),score=21.34 TRINITY_DN2418_c0_g1_i2:442-867(+)	1.55	415.4	3	1	0	5.67	141	TRINITY_DN2418_c0_g1_i2.p1	TRINITY_DN2418_c0_g1_i2	NSE3_HUMAN^NSE3_HUMAN^Q:379-837,H:137-289^42.484%ID^E:2.3e-35^RecName: Full	Non-structural maintenance of chromosomes element 3 homolog	TRINITY_DN2418_c0_g1_i2.p1	NSE3_HUMAN^NSE3_HUMAN^Q:13-132,H:169-289^47.107%ID^E:2.65e-34^RecName: Full=Non-structural maintenance of chromosomes element 3 homolog;^Eukaryota; Metazoa; Chordata; Craniata; Vertebrata; Euteleostomi; Mammalia; Eutheria; Euarchontoglires; Primates; Haplorrhini; Catarrhini; Hominidae; Homo	.	ExpAA=15.47^PredHel=1^Topology=o20-42i	ENOG4111S70^Melanoma antigen, family	KEGG:hsa:56160`KO:K22823	GO:0000781^cellular_component^chromosome, telomeric region`GO:0005737^cellular_component^cytoplasm`GO:0005654^cellular_component^nucleoplasm`GO:0030915^cellular_component^Smc5-Smc6 complex`GO:0046983^molecular_function^protein dimerization activity`GO:0072711^biological_process^cellular response to hydroxyurea`GO:0071478^biological_process^cellular response to radiation`GO:0034644^biological_proc…	GO:0000781^cellular_component^chromosome, telomeric region`GO:0005737^cellular_component^cytoplasm`GO:0005654^cellular_component^nucleoplasm`GO:0030915^cellular_component^Smc5-Smc6 complex`GO:0046983^molecular_function^protein dimerization activity`GO:0072711^biological_process^cellular response to hydroxyurea`GO:0071478^biological_process^cellular response to radiation`GO:0034644^biological_proc…	GO:0000781^cellular_component^chromosome, telomeric region	GO:0005737^cellular_component^cytoplasm	GO:0005654;GO:0030915;GO:0046983;GO:0072711;GO:0071478;GO:0034644;GO:0006310;GO:0006281;GO:0031398;GO:0040008;GO:0006355;	Y	+	FALSE	4.96454	0	3.5461	15.6028	2.83688	7.80142	3.5461	4.96454	7.0922	9.21986	4.96454	1.41844	2.12766	5.67376	4.25532	4.25532	4.96454	7.0922	2.83688	2.83688	100	19.1489	8.51064	OTHER
>TRINITY_DN2463_c0_g1_i2.p1 TRINITY_DN2463_c0_g1~~TRINITY_DN2463_c0_g1_i2.p1 ORF type:5prime_partial len:562 (+),score=105.16 TRINITY_DN2463_c0_g1_i2:3-1688(+)	6.04	488.9	3	3	1	5.35	561	TRINITY_DN2463_c0_g1_i2.p1	TRINITY_DN2463_c0_g1_i2	CHDH_RAT^CHDH_RAT^Q:30-1676,H:37-591^56.15%ID^E:0^RecName: Full	Choline dehydrogenase, mitochondrial	TRINITY_DN2463_c0_g1_i2.p1	CHDH_RAT^CHDH_RAT^Q:1-488,H:99-591^56.795%ID^E:0^RecName: Full=Choline dehydrogenase, mitochondrial;^Eukaryota; Metazoa; Chordata; Craniata; Vertebrata; Euteleostomi; Mammalia; Eutheria; Euarchontoglires; Glires; Rodentia; Myomorpha; Muroidea; Muridae; Murinae; Rattus	tr|A0A3M6TC16|A0A3M6TC16_9CNID^tr|A0A3M6TC16|A0A3M6TC16_9CNID^Q:1264-332,H:1-308^58.599%ID^E:6.71e-122^.^.	.	COG2303^oxidoreductase	KEGG:rno:290551`KO:K00108	GO:0005743^cellular_component^mitochondrial inner membrane`GO:0008812^molecular_function^choline dehydrogenase activity`GO:0050660^molecular_function^flavin adenine dinucleotide binding`GO:0019285^biological_process^glycine betaine biosynthetic process from choline	GO:0005743^cellular_component^mitochondrial inner membrane`GO:0008812^molecular_function^choline dehydrogenase activity`GO:0050660^molecular_function^flavin adenine dinucleotide binding`GO:0019285^biological_process^glycine betaine biosynthetic process from choline	GO:0005743^cellular_component^mitochondrial inner membrane	GO:0008812^molecular_function^choline dehydrogenase activity	GO:0050660;GO:0019285	Y	FALSE	FALSE	8.3779	1.96078	5.7041	5.7041	3.92157	9.26916	2.85205	5.34759	5.34759	7.48663	3.38681	5.16934	5.34759	5.34759	3.20856	7.13012	4.63458	5.88235	1.42602	2.49554	100	11.4082	7.84314
>TRINITY_DN2524_c0_g1_i11.p1 TRINITY_DN2524_c0_g1~~TRINITY_DN2524_c0_g1_i11.p1 ORF type:3prime_partial len:639 (-),score=72.79 TRINITY_DN2524_c0_g1_i11:1-1914(-)	3.48	493.1	4	3	0	3.45	638	TRINITY_DN2524_c0_g1_i11.p1	TRINITY_DN2524_c0_g1_i11	ITB1B_XENLA^ITB1B_XENLA^Q:1890-10,H:10-652^41.818%ID^E:6.44e-144^RecName: Full	Integrin beta-1-B	TRINITY_DN2524_c0_g1_i11.p1	ITB1B_XENLA^ITB1B_XENLA^Q:9-635,H:10-652^42.511%ID^E:6.56e-151^RecName: Full=Integrin beta-1-B;^Eukaryota; Metazoa; Chordata; Craniata; Vertebrata; Euteleostomi; Amphibia; Batrachia; Anura; Pipoidea; Pipidae; Xenopodinae; Xenopus; Xenopus	.	.	.	.	GO:0030054^cellular_component^cell junction`GO:0032154^cellular_component^cleavage furrow`GO:0008305^cellular_component^integrin complex`GO:0071438^cellular_component^invadopodium membrane`GO:0030027^cellular_component^lamellipodium`GO:0042470^cellular_component^melanosome`GO:0032587^cellular_component^ruffle membrane`GO:0038023^molecular_function^signaling receptor activity`GO:0007160^biological…	GO:0030054^cellular_component^cell junction`GO:0032154^cellular_component^cleavage furrow`GO:0008305^cellular_component^integrin complex`GO:0071438^cellular_component^invadopodium membrane`GO:0030027^cellular_component^lamellipodium`GO:0042470^cellular_component^melanosome`GO:0032587^cellular_component^ruffle membrane`GO:0038023^molecular_function^signaling receptor activity`GO:0007160^biological…	GO:0030054^cellular_component^cell junction	GO:0032154^cellular_component^cleavage furrow	GO:0008305;GO:0071438;GO:0030027;GO:0042470;GO:0032587;GO:0038023;GO:0007160;GO:0007229	Y	FALSE	+	5.01567	8.15047	6.89655	6.42633	3.29154	9.40439	1.5674	5.01567	7.52351	6.73981	0.940439	4.23197	4.23197	3.76176	3.76176	8.15047	3.9185	7.36677	0.783699	2.82132	100	13.3229	6.89655
>TRINITY_DN25259_c0_g1_i3.p1 TRINITY_DN25259_c0_g1~~TRINITY_DN25259_c0_g1_i3.p1 ORF type:complete len:207 (-),score=43.23 TRINITY_DN25259_c0_g1_i3:1228-1848(-)	15.73	903.3	5	4	0	13.59	206	TRINITY_DN25259_c0_g1_i3.p1	TRINITY_DN25259_c0_g1_i3	CD151_HUMAN^CD151_HUMAN^Q:1881-1234,H:24-252^37.931%ID^E:7.3e-28^RecName: Full	CD151 antigen	TRINITY_DN25259_c0_g1_i3.p1	TSN11_MOUSE^TSN11_MOUSE^Q:1-201,H:35-248^34.112%ID^E:2.36e-39^RecName: Full=Tetraspanin-11;^Eukaryota; Metazoa; Chordata; Craniata; Vertebrata; Euteleostomi; Mammalia; Eutheria; Euarchontoglires; Glires; Rodentia; Myomorpha; Muroidea; Muridae; Murinae; Mus; Mus	.	ExpAA=67.87^PredHel=3^Topology=o26-48i55-77o176-198i	ENOG4111IRY^tetraspanin	KEGG:mmu:68498`KO:K17352	GO:0005604^cellular_component^basement membrane`GO:0009986^cellular_component^cell surface`GO:0005829^cellular_component^cytosol`GO:0005925^cellular_component^focal adhesion`GO:0005887^cellular_component^integral component of plasma membrane`GO:0016020^cellular_component^membrane`GO:0005886^cellular_component^plasma membrane`GO:0005178^molecular_function^integrin binding`GO:0007155^biological_pro…	GO:0005887^cellular_component^integral component of plasma membrane`GO:0016477^biological_process^cell migration	GO:0005887^cellular_component^integral component of plasma membrane	GO:0016477^biological_process^cell migration		Y	+	FALSE	9.70874	4.36893	3.8835	6.79612	4.36893	9.2233	0	12.6214	8.73786	7.76699	2.42718	3.8835	1.45631	3.39806	1.94175	5.33981	4.85437	4.85437	0.970874	3.39806	100	10.6796	8.73786	OTHER
>TRINITY_DN2533_c0_g1_i4.p1 TRINITY_DN2533_c0_g1~~TRINITY_DN2533_c0_g1_i4.p1 ORF type:complete len:505 (+),score=61.20 TRINITY_DN2533_c0_g1_i4:147-1661(+)	1.41	424.1	4	3	1	5.36	504	TRINITY_DN2533_c0_g1_i4.p1	TRINITY_DN2533_c0_g1_i4	EFHC2_DANRE^EFHC2_DANRE^Q:147-1604,H:1-487^67.146%ID^E:0^RecName: Full	EF-hand domain-containing family member C2	TRINITY_DN2533_c0_g1_i4.p1	EFHC2_DANRE^EFHC2_DANRE^Q:1-486,H:1-487^67.146%ID^E:0^RecName: Full=EF-hand domain-containing family member C2;^Eukaryota; Metazoa; Chordata; Craniata; Vertebrata; Euteleostomi; Actinopterygii; Neopterygii; Teleostei; Ostariophysi; Cypriniformes; Cyprinidae; Danio	.	.	ENOG410XQCQ^EF-hand domain (C-terminal) containing	.	GO:1903251^biological_process^multi-ciliated epithelial cell differentiation`GO:0010975^biological_process^regulation of neuron projection development`GO:0039010^biological_process^specification of pronephric distal tubule identity	GO:1903251^biological_process^multi-ciliated epithelial cell differentiation`GO:0010975^biological_process^regulation of neuron projection development`GO:0039010^biological_process^specification of pronephric distal tubule identity	GO:1903251^biological_process^multi-ciliated epithelial cell differentiation	GO:0010975^biological_process^regulation of neuron projection development	GO:0039010;	Y	+	FALSE	3.96825	1.5873	6.94444	6.54762	5.95238	7.7381	2.77778	5.35714	6.74603	7.7381	1.78571	3.96825	7.53968	3.37302	7.34127	5.35714	4.36508	5.95238	0.793651	4.16667	100	13.4921	10.9127	OTHER
>TRINITY_DN2536_c1_g1_i2.p1 TRINITY_DN2536_c1_g1~~TRINITY_DN2536_c1_g1_i2.p1 ORF type:complete len:413 (-),score=56.66 TRINITY_DN2536_c1_g1_i2:371-1609(-)	2.33	369.8	4	2	1	4.61	412	TRINITY_DN2536_c1_g1_i2.p1	TRINITY_DN2536_c1_g1_i2	AATC_CHICK^AATC_CHICK^Q:1606-389,H:3-411^52.913%ID^E:9.75e-164^RecName: Full	Aspartate aminotransferase, cytoplasmic	TRINITY_DN2536_c1_g1_i2.p1	AATC_CHICK^AATC_CHICK^Q:2-407,H:3-411^52.913%ID^E:2.09e-166^RecName: Full=Aspartate aminotransferase, cytoplasmic;^Eukaryota; Metazoa; Chordata; Craniata; Vertebrata; Euteleostomi; Archelosauria; Archosauria; Dinosauria; Saurischia; Theropoda; Coelurosauria; Aves; Neognathae; Galloanserae; Galliformes; Phasianidae; Phasianinae; Gallus	.	.	COG1448^aminotransferase	KEGG:gga:396261`KO:K14454	GO:0005829^cellular_component^cytosol`GO:0004069^molecular_function^L-aspartate:2-oxoglutarate aminotransferase activity`GO:0047801^molecular_function^L-cysteine:2-oxoglutarate aminotransferase activity`GO:0030170^molecular_function^pyridoxal phosphate binding`GO:0006103^biological_process^2-oxoglutarate metabolic process`GO:0006532^biological_process^aspartate biosynthetic process`GO:0006531^bio…	GO:0005829^cellular_component^cytosol`GO:0004069^molecular_function^L-aspartate:2-oxoglutarate aminotransferase activity`GO:0047801^molecular_function^L-cysteine:2-oxoglutarate aminotransferase activity`GO:0030170^molecular_function^pyridoxal phosphate binding`GO:0006103^biological_process^2-oxoglutarate metabolic process`GO:0006532^biological_process^aspartate biosynthetic process`GO:0006531^bio…	GO:0005829^cellular_component^cytosol	GO:0004069^molecular_function^L-aspartate:2-oxoglutarate aminotransferase activity	GO:0047801;GO:0030170;GO:0006103;GO:0006532;GO:0006531;GO:0006520;GO:0006094;GO:0006536;GO:0006114;	Y	+	FALSE	9.95146	0.970874	6.31068	4.12621	3.8835	7.28155	3.15534	5.58252	5.33981	8.98058	1.94175	6.31068	4.85437	2.91262	4.36893	5.82524	5.58252	7.03883	1.69903	3.8835	100	10.4369	9.46602	OTHER
>TRINITY_DN25572_c0_g2_i1.p1 TRINITY_DN25572_c0_g2~~TRINITY_DN25572_c0_g2_i1.p1 ORF type:complete len:110 (-),score=3.55 TRINITY_DN25572_c0_g2_i1:236-565(-)	1.16	455.1	2	2	1	9.17	109	TRINITY_DN25572_c0_g2_i1.p1	TRINITY_DN25572_c0_g2_i1	RL36_DANRE^RL36_DANRE^Q:544-317,H:6-81^72.368%ID^E:3.82e-31^RecName: Full	60S ribosomal protein L36	TRINITY_DN25572_c0_g2_i1.p1	RL36_DANRE^RL36_DANRE^Q:8-83,H:6-81^72.368%ID^E:6.41e-33^RecName: Full=60S ribosomal protein L36;^Eukaryota; Metazoa; Chordata; Craniata; Vertebrata; Euteleostomi; Actinopterygii; Neopterygii; Teleostei; Ostariophysi; Cypriniformes; Cyprinidae; Danio	.	.	COG5051^60S ribosomal protein l36	KEGG:dre:405888`KO:K02920	GO:0022625^cellular_component^cytosolic large ribosomal subunit`GO:0003735^molecular_function^structural constituent of ribosome`GO:0007420^biological_process^brain development`GO:0002181^biological_process^cytoplasmic translation`GO:0051726^biological_process^regulation of cell cycle	GO:0022625^cellular_component^cytosolic large ribosomal subunit`GO:0003735^molecular_function^structural constituent of ribosome`GO:0007420^biological_process^brain development`GO:0002181^biological_process^cytoplasmic translation`GO:0051726^biological_process^regulation of cell cycle	GO:0022625^cellular_component^cytosolic large ribosomal subunit	GO:0003735^molecular_function^structural constituent of ribosome	GO:0007420;GO:0002181;GO:0051726;	Y	+	FALSE	7.33945	5.50459	3.66972	2.75229	2.75229	5.50459	0.917431	3.66972	15.5963	10.0917	4.58716	4.58716	5.50459	0	9.17431	4.58716	2.75229	9.17431	0	1.83486	100	6.42202	4.58716	OTHER
>TRINITY_DN27090_c0_g1_i1.p1 TRINITY_DN27090_c0_g1~~TRINITY_DN27090_c0_g1_i1.p1 ORF type:internal len:194 (-),score=64.57 TRINITY_DN27090_c0_g1_i1:3-581(-)	3.57	374.7	3	1	1	7.77	193	TRINITY_DN27090_c0_g1_i1.p1	TRINITY_DN27090_c0_g1_i1	no blast hit	no blast hit	TRINITY_DN27090_c0_g1_i1.p1	.	.	.	.	.	.	.	.			Y	FALSE	FALSE	4.66321	0.518135	5.69948	11.9171	2.59067	3.62694	0.518135	7.77202	8.29016	7.25389	4.14508	5.18135	1.03627	5.18135	4.66321	5.18135	5.69948	13.9896	0.518135	1.5544	100	17.6166	4.66321
>TRINITY_DN2716_c0_g1_i10.p1 TRINITY_DN2716_c0_g1~~TRINITY_DN2716_c0_g1_i10.p1 ORF type:5prime_partial len:573 (-),score=84.17 TRINITY_DN2716_c0_g1_i10:1163-2881(-)	3.05	517.1	3	3	2	5.59	572	TRINITY_DN2716_c0_g1_i10.p1	TRINITY_DN2716_c0_g1_i10	ANXA7_BOVIN^ANXA7_BOVIN^Q:2107-1172,H:151-462^59.295%ID^E:4.14e-123^RecName: Full	Annexin A7	TRINITY_DN2716_c0_g1_i10.p1	ANXA7_HUMAN^ANXA7_HUMAN^Q:94-570,H:26-487^48.033%ID^E:3.81e-132^RecName: Full=Annexin A7;^Eukaryota; Metazoa; Chordata; Craniata; Vertebrata; Euteleostomi; Mammalia; Eutheria; Euarchontoglires; Primates; Haplorrhini; Catarrhini; Hominidae; Homo	tr|A0A3M6TGW0|A0A3M6TGW0_9CNID^tr|A0A3M6TGW0|A0A3M6TGW0_9CNID^Q:2884-1070,H:2054-2660^71.17%ID^E:0^.^.	.	ENOG410XPUN^annexin A7	KEGG:hsa:310`KO:K17095	GO:0005623^cellular_component^cell`GO:0042584^cellular_component^chromaffin granule membrane`GO:0005634^cellular_component^nucleus`GO:0005509^molecular_function^calcium ion binding`GO:0005544^molecular_function^calcium-dependent phospholipid binding`GO:0048306^molecular_function^calcium-dependent protein binding`GO:0042802^molecular_function^identical protein binding`GO:0005178^molecular_function…	GO:0005623^cellular_component^cell`GO:0062023^cellular_component^collagen-containing extracellular matrix`GO:0005829^cellular_component^cytosol`GO:0005789^cellular_component^endoplasmic reticulum membrane`GO:0070062^cellular_component^extracellular exosome`GO:0016020^cellular_component^membrane`GO:0005635^cellular_component^nuclear envelope`GO:0005634^cellular_component^nucleus`GO:0005886^cellula…	GO:0005623^cellular_component^cell	GO:0062023^cellular_component^collagen-containing extracellular matrix	GO:0005829;GO:0005789;GO:0070062;GO:0016020;GO:0005635;GO:0005634;GO:0005886;GO:0005509;GO:0005544;GO:0048306;GO:0042802;GO:0005178;GO:0003723;GO:0006914;GO:0008283;GO:0006874;GO:0009992;GO:0030855;GO:0007599;GO:0061025;GO:0010629;GO:0008360;GO:0051592;GO:0014070;GO:0009651;	Y	FALSE	FALSE	8.74126	1.92308	4.54545	4.72028	2.27273	9.26573	1.22378	3.84615	5.41958	6.99301	2.97203	2.27273	12.4126	6.99301	4.1958	6.64336	4.54545	4.54545	0.699301	5.76923	100	9.26573	8.74126
>TRINITY_DN2790_c0_g4_i1.p1 TRINITY_DN2790_c0_g4~~TRINITY_DN2790_c0_g4_i1.p1 ORF type:complete len:378 (+),score=75.64 TRINITY_DN2790_c0_g4_i1:99-1232(+)	12.28	490.6	11	8	1	19.89	377	TRINITY_DN2790_c0_g4_i1.p1	TRINITY_DN2790_c0_g4_i1	ARC1A_MOUSE^ARC1A_MOUSE^Q:114-1226,H:3-369^59.946%ID^E:1.6e-161^RecName: Full	Actin-related protein 2/3 complex subunit 1A	TRINITY_DN2790_c0_g4_i1.p1	ARC1A_MOUSE^ARC1A_MOUSE^Q:6-376,H:3-369^59.946%ID^E:7.27e-164^RecName: Full=Actin-related protein 2/3 complex subunit 1A;^Eukaryota; Metazoa; Chordata; Craniata; Vertebrata; Euteleostomi; Mammalia; Eutheria; Euarchontoglires; Glires; Rodentia; Myomorpha; Muroidea; Muridae; Murinae; Mus; Mus	.	.	ENOG410XNWX^protein 2 3 complex subunit	KEGG:mmu:56443`KO:K05757	GO:0005885^cellular_component^Arp2/3 protein complex`GO:0005737^cellular_component^cytoplasm`GO:0036195^cellular_component^muscle cell projection membrane`GO:0005634^cellular_component^nucleus`GO:0035861^cellular_component^site of double-strand break`GO:0051015^molecular_function^actin filament binding`GO:0034314^biological_process^Arp2/3 complex-mediated actin nucleation	GO:0005885^cellular_component^Arp2/3 protein complex`GO:0005737^cellular_component^cytoplasm`GO:0036195^cellular_component^muscle cell projection membrane`GO:0005634^cellular_component^nucleus`GO:0035861^cellular_component^site of double-strand break`GO:0051015^molecular_function^actin filament binding`GO:0034314^biological_process^Arp2/3 complex-mediated actin nucleation	GO:0005885^cellular_component^Arp2/3 protein complex	GO:0005737^cellular_component^cytoplasm	GO:0036195;GO:0005634;GO:0035861;GO:0051015;GO:0034314;	Y	+	FALSE	7.95756	1.59151	6.6313	3.18302	4.50928	7.42706	2.91777	4.50928	8.48806	6.1008	1.59151	5.03979	2.91777	3.71353	3.97878	9.01857	6.36605	9.28382	3.44828	1.32626	100	9.81432	9.28382	OTHER
>TRINITY_DN28338_c0_g1_i1.p1 TRINITY_DN28338_c0_g1~~TRINITY_DN28338_c0_g1_i1.p1 ORF type:3prime_partial len:169 (-),score=28.12 TRINITY_DN28338_c0_g1_i1:2-505(-)	1.24	373.5	3	1	1	5.36	168	TRINITY_DN28338_c0_g1_i1.p1	TRINITY_DN28338_c0_g1_i1	no blast hit	no blast hit	TRINITY_DN28338_c0_g1_i1.p1	.	tr|A0A2B4SME4|A0A2B4SME4_STYPI^tr|A0A2B4SME4|A0A2B4SME4_STYPI^Q:1115-426,H:209-435^79.13%ID^E:5.42e-112^.^.	ExpAA=22.93^PredHel=1^Topology=o33-55i	.	.	.	.	.			Y	FALSE	+	9.52381	0	4.7619	7.7381	3.57143	5.35714	1.78571	7.14286	10.119	5.95238	2.38095	2.38095	5.95238	1.78571	3.57143	9.52381	4.7619	9.52381	0.595238	3.57143	100	12.5	7.7381
>TRINITY_DN292_c0_g1_i16.p1 TRINITY_DN292_c0_g1~~TRINITY_DN292_c0_g1_i16.p1 ORF type:3prime_partial len:158 (-),score=8.99 TRINITY_DN292_c0_g1_i16:2-472(-)	3.09	393.2	4	3	0	15.92	157	TRINITY_DN292_c0_g1_i16.p1	TRINITY_DN292_c0_g1_i16	no blast hit	no blast hit	TRINITY_DN292_c0_g1_i16.p1	.	.	ExpAA=19.32^PredHel=1^Topology=o15-34i	.	.	.	.	.			Y	FALSE	+	7.64331	0.636943	7.64331	4.4586	3.18471	8.28025	2.54777	3.82166	4.4586	10.1911	1.27389	5.73248	2.54777	1.91083	7.00637	9.55414	5.73248	8.28025	0.636943	4.4586	100	12.1019	8.28025
>TRINITY_DN2929_c0_g1_i2.p1 TRINITY_DN2929_c0_g1~~TRINITY_DN2929_c0_g1_i2.p1 ORF type:5prime_partial len:397 (+),score=80.86 TRINITY_DN2929_c0_g1_i2:3-1193(+)	2.28	392.3	2	2	1	9.6	396	TRINITY_DN2929_c0_g1_i2.p1	TRINITY_DN2929_c0_g1_i2	P2OX_TRIMT^P2OX_TRIMT^Q:36-1172,H:180-561^39.744%ID^E:6.17e-86^RecName: Full	Pyranose 2-oxidase	TRINITY_DN2929_c0_g1_i2.p1	P2OX_TRIMT^P2OX_TRIMT^Q:12-390,H:180-561^39.744%ID^E:2.6e-88^RecName: Full=Pyranose 2-oxidase;^Eukaryota; Fungi; Dikarya; Basidiomycota; Agaricomycotina; Agaricomycetes; Agaricomycetidae; Agaricales; Tricholomataceae; Tricholoma	.	.	.	.	GO:0050660^molecular_function^flavin adenine dinucleotide binding`GO:0050233^molecular_function^pyranose oxidase activity	GO:0050660^molecular_function^flavin adenine dinucleotide binding`GO:0050233^molecular_function^pyranose oxidase activity	GO:0050660^molecular_function^flavin adenine dinucleotide binding	GO:0050233^molecular_function^pyranose oxidase activity		Y	FALSE	FALSE	8.33333	2.77778	6.06061	5.80808	3.0303	5.80808	1.51515	6.06061	5.55556	8.83838	3.0303	2.52525	6.56566	5.30303	5.80808	6.06061	6.56566	6.31313	2.0202	2.0202	100	11.8687	7.07071
>TRINITY_DN31103_c0_g1_i2.p1 TRINITY_DN31103_c0_g1~~TRINITY_DN31103_c0_g1_i2.p1 ORF type:complete len:222 (-),score=32.14 TRINITY_DN31103_c0_g1_i2:168-833(-)	3.94	407	7	5	1	18.55	221	TRINITY_DN31103_c0_g1_i2.p1	TRINITY_DN31103_c0_g1_i2	PRDX6_CHICK^PRDX6_CHICK^Q:824-171,H:6-224^66.818%ID^E:3.86e-101^RecName: Full	Peroxiredoxin-6	TRINITY_DN31103_c0_g1_i2.p1	PRDX6_CHICK^PRDX6_CHICK^Q:4-221,H:6-224^66.818%ID^E:1.55e-102^RecName: Full=Peroxiredoxin-6;^Eukaryota; Metazoa; Chordata; Craniata; Vertebrata; Euteleostomi; Archelosauria; Archosauria; Dinosauria; Saurischia; Theropoda; Coelurosauria; Aves; Neognathae; Galloanserae; Galliformes; Phasianidae; Phasianinae; Gallus	.	.	COG0450^alkyl hydroperoxide reductase	KEGG:gga:429062`KO:K11188	GO:0005623^cellular_component^cell`GO:0005829^cellular_component^cytosol`GO:0005615^cellular_component^extracellular space`GO:0005764^cellular_component^lysosome`GO:0004601^molecular_function^peroxidase activity`GO:0051920^molecular_function^peroxiredoxin activity`GO:0004623^molecular_function^phospholipase A2 activity`GO:0102567^molecular_function^phospholipase A2 activity (consuming 1,2-dipalmi…	GO:0005623^cellular_component^cell`GO:0005829^cellular_component^cytosol`GO:0005615^cellular_component^extracellular space`GO:0005764^cellular_component^lysosome`GO:0004601^molecular_function^peroxidase activity`GO:0051920^molecular_function^peroxiredoxin activity`GO:0004623^molecular_function^phospholipase A2 activity`GO:0102567^molecular_function^phospholipase A2 activity (consuming 1,2-dipalmi…	GO:0005623^cellular_component^cell	GO:0005829^cellular_component^cytosol	GO:0005615;GO:0005764;GO:0004601;GO:0051920;GO:0004623;GO:0102567;GO:0102568;GO:0045454;GO:0016042;	Y	+	FALSE	5.42986	2.26244	7.69231	6.78733	4.52489	6.78733	1.80995	6.33484	9.50226	8.1448	2.71493	1.35747	7.23982	2.26244	3.61991	6.33484	5.88235	7.23982	1.80995	2.26244	100	14.4796	8.59729	OTHER
>TRINITY_DN312_c0_g1_i10.p1 TRINITY_DN312_c0_g1~~TRINITY_DN312_c0_g1_i10.p1 ORF type:complete len:500 (-),score=36.43 TRINITY_DN312_c0_g1_i10:221-1720(-)	2.76	409.9	2	2	0	3.61	499	TRINITY_DN312_c0_g1_i10.p1	TRINITY_DN312_c0_g1_i10	LBP_BOVIN^LBP_BOVIN^Q:1660-296,H:28-478^31.441%ID^E:4.63e-68^RecName: Full	Lipopolysaccharide-binding protein	TRINITY_DN312_c0_g1_i10.p1	LBP_BOVIN^LBP_BOVIN^Q:21-475,H:28-478^31.441%ID^E:1.43e-75^RecName: Full=Lipopolysaccharide-binding protein;^Eukaryota; Metazoa; Chordata; Craniata; Vertebrata; Euteleostomi; Mammalia; Eutheria; Laurasiatheria; Artiodactyla; Ruminantia; Pecora; Bovidae; Bovinae; Bos	.	.	ENOG410Z88E^BPI fold containing family B, member	KEGG:bta:512242`KO:K05399	GO:0005615^cellular_component^extracellular space`GO:0016020^cellular_component^membrane`GO:0001530^molecular_function^lipopolysaccharide binding`GO:0006953^biological_process^acute-phase response`GO:0071222^biological_process^cellular response to lipopolysaccharide`GO:0050829^biological_process^defense response to Gram-negative bacterium`GO:0050830^biological_process^defense response to Gram-pos…	GO:0005615^cellular_component^extracellular space`GO:0016020^cellular_component^membrane`GO:0001530^molecular_function^lipopolysaccharide binding`GO:0006953^biological_process^acute-phase response`GO:0071222^biological_process^cellular response to lipopolysaccharide`GO:0050829^biological_process^defense response to Gram-negative bacterium`GO:0050830^biological_process^defense response to Gram-pos…	GO:0005615^cellular_component^extracellular space	GO:0016020^cellular_component^membrane	GO:0001530;GO:0006953;GO:0071222;GO:0050829;GO:0050830;GO:0045087;GO:0006869;GO:0031663;GO:0002281;GO:0043032;GO:0042535;GO:0032760	Y	+	FALSE	7.41483	1.2024	8.01603	2.20441	3.80762	6.41283	2.60521	7.61523	6.21242	11.2224	1.40281	4.00802	5.21042	3.80762	1.2024	11.022	5.81162	7.21443	0.601202	3.00601	100	10.2204	7.41483	SP(Sec/SPI)
>TRINITY_DN31246_c0_g1_i4.p1 TRINITY_DN31246_c0_g1~~TRINITY_DN31246_c0_g1_i4.p1 ORF type:internal len:165 (+),score=17.15 TRINITY_DN31246_c0_g1_i4:1-492(+)	3.43	474.2	2	2	1	16.46	164	TRINITY_DN31246_c0_g1_i4.p1	TRINITY_DN31246_c0_g1_i4	CRP1_LIMPO^CRP1_LIMPO^Q:7-492,H:53-212^40.719%ID^E:2.83e-30^RecName: Full	C-reactive protein 1.1	TRINITY_DN31246_c0_g1_i4.p1	CRP1_LIMPO^CRP1_LIMPO^Q:3-164,H:53-212^40.719%ID^E:2.54e-30^RecName: Full=C-reactive protein 1.1;^Eukaryota; Metazoa; Ecdysozoa; Arthropoda; Chelicerata; Merostomata; Xiphosura; Limulidae; Limulus	.	.	.	.	GO:0005576^cellular_component^extracellular region`GO:0046872^molecular_function^metal ion binding	GO:0005576^cellular_component^extracellular region`GO:0046872^molecular_function^metal ion binding	GO:0005576^cellular_component^extracellular region	GO:0046872^molecular_function^metal ion binding		Y	FALSE	FALSE	7.31707	2.43902	4.87805	4.87805	3.65854	13.4146	2.43902	3.04878	4.26829	8.53659	3.04878	6.09756	1.82927	5.4878	3.04878	8.53659	5.4878	6.09756	2.43902	3.04878	100	9.7561	9.14634
>TRINITY_DN314_c0_g1_i12.p1 TRINITY_DN314_c0_g1~~TRINITY_DN314_c0_g1_i12.p1 ORF type:5prime_partial len:687 (-),score=114.48 TRINITY_DN314_c0_g1_i12:127-2187(-)	2.54	424.4	4	2	1	3.06	686	TRINITY_DN314_c0_g1_i12.p1	TRINITY_DN314_c0_g1_i12	FBP3_STRPU^FBP3_STRPU^Q:1428-730,H:178-402^39.496%ID^E:5.35e-40^RecName: Full	Fibropellin-3	TRINITY_DN314_c0_g1_i12.p1	FBP3_STRPU^FBP3_STRPU^Q:254-486,H:178-402^39.496%ID^E:1.12e-40^RecName: Full=Fibropellin-3;^Eukaryota; Metazoa; Echinodermata; Eleutherozoa; Echinozoa; Echinoidea; Euechinoidea; Echinacea; Echinoida; Strongylocentrotidae; Strongylocentrotus	.	.	.	KEGG:spu:373315	GO:0005615^cellular_component^extracellular space`GO:0009374^molecular_function^biotin binding`GO:0005509^molecular_function^calcium ion binding	GO:0005615^cellular_component^extracellular space`GO:0009374^molecular_function^biotin binding`GO:0005509^molecular_function^calcium ion binding	GO:0005615^cellular_component^extracellular space	GO:0009374^molecular_function^biotin binding	GO:0005509;	Y	FALSE	FALSE	5.68513	8.30904	5.39359	6.41399	4.22741	9.47522	2.76968	2.62391	9.0379	5.24781	1.31195	3.79009	4.8105	2.47813	5.10204	7.58017	5.10204	3.93586	1.02041	5.68513	100	11.8076	10.9329
>TRINITY_DN323_c0_g1_i5.p1 TRINITY_DN323_c0_g1~~TRINITY_DN323_c0_g1_i5.p1 ORF type:complete len:856 (-),score=90.15 TRINITY_DN323_c0_g1_i5:233-2800(-)	18.37	542.5	7	7	1	8.89	855	TRINITY_DN323_c0_g1_i5.p1	TRINITY_DN323_c0_g1_i5	FBLN2_MOUSE^FBLN2_MOUSE^Q:2746-248,H:422-1217^28.939%ID^E:1.22e-76^RecName: Full	Fibulin-2	TRINITY_DN323_c0_g1_i5.p1	FBLN2_MOUSE^FBLN2_MOUSE^Q:19-851,H:422-1217^29.05%ID^E:5.93e-79^RecName: Full=Fibulin-2;^Eukaryota; Metazoa; Chordata; Craniata; Vertebrata; Euteleostomi; Mammalia; Eutheria; Euarchontoglires; Glires; Rodentia; Myomorpha; Muroidea; Muridae; Murinae; Mus; Mus	.	.	ENOG410Y194^Fibulin 2	KEGG:mmu:14115`KO:K17307	GO:0062023^cellular_component^collagen-containing extracellular matrix`GO:0005615^cellular_component^extracellular space`GO:0005509^molecular_function^calcium ion binding`GO:0050840^molecular_function^extracellular matrix binding`GO:0030198^biological_process^extracellular matrix organization`GO:0010811^biological_process^positive regulation of cell-substrate adhesion	GO:0062023^cellular_component^collagen-containing extracellular matrix`GO:0005615^cellular_component^extracellular space`GO:0005509^molecular_function^calcium ion binding`GO:0050840^molecular_function^extracellular matrix binding`GO:0030198^biological_process^extracellular matrix organization`GO:0010811^biological_process^positive regulation of cell-substrate adhesion	GO:0062023^cellular_component^collagen-containing extracellular matrix	GO:0005615^cellular_component^extracellular space	GO:0005509;GO:0050840;GO:0030198;GO:0010811	Y	+	FALSE	5.96491	11.5789	5.38012	6.08187	2.10526	7.60234	1.63743	3.50877	3.50877	4.09357	0.701754	5.38012	3.85965	3.50877	8.18713	8.65497	7.25146	5.96491	0.233918	4.79532	100	11.462	7.1345	SP(Sec/SPI)
>TRINITY_DN32375_c1_g1_i10.p1 TRINITY_DN32375_c1_g1~~TRINITY_DN32375_c1_g1_i10.p1 ORF type:5prime_partial len:173 (+),score=21.42 TRINITY_DN32375_c1_g1_i10:1-519(+)	14.83	541.8	9	7	3	27.91	172	TRINITY_DN32375_c1_g1_i10.p1	TRINITY_DN32375_c1_g1_i10	FA8_CANLF^FA8_CANLF^Q:4-366,H:2219-2338^43.902%ID^E:3.81e-26^RecName: Full	Coagulation factor VIII	TRINITY_DN32375_c1_g1_i10.p1	FA8_CANLF^FA8_CANLF^Q:2-122,H:2219-2338^43.902%ID^E:2.52e-27^RecName: Full=Coagulation factor VIII;^Eukaryota; Metazoa; Chordata; Craniata; Vertebrata; Euteleostomi; Mammalia; Eutheria; Laurasiatheria; Carnivora; Caniformia; Canidae; Canis	.	.	ENOG4111F6G^coagulation factor	KEGG:cfa:403875`KO:K03899	GO:0005615^cellular_component^extracellular space`GO:0005507^molecular_function^copper ion binding`GO:0016491^molecular_function^oxidoreductase activity`GO:0006953^biological_process^acute-phase response`GO:0007597^biological_process^blood coagulation, intrinsic pathway`GO:0030168^biological_process^platelet activation	GO:0005615^cellular_component^extracellular space`GO:0005507^molecular_function^copper ion binding`GO:0016491^molecular_function^oxidoreductase activity`GO:0006953^biological_process^acute-phase response`GO:0007597^biological_process^blood coagulation, intrinsic pathway`GO:0030168^biological_process^platelet activation	GO:0005615^cellular_component^extracellular space	GO:0005507^molecular_function^copper ion binding	GO:0016491;GO:0006953;GO:0007597;GO:0030168	Y	FALSE	FALSE	9.30233	0.581395	4.65116	3.48837	2.90698	6.97674	3.48837	3.48837	4.65116	6.39535	1.74419	5.23256	5.23256	8.13953	7.55814	4.65116	9.88372	7.55814	2.32558	1.74419	100	8.13953	6.97674
>TRINITY_DN32608_c0_g1_i3.p1 TRINITY_DN32608_c0_g1~~TRINITY_DN32608_c0_g1_i3.p1 ORF type:5prime_partial len:206 (-),score=34.06 TRINITY_DN32608_c0_g1_i3:343-960(-)	1.21	305.4	4	4	2	16.59	205	TRINITY_DN32608_c0_g1_i3.p1	TRINITY_DN32608_c0_g1_i3	TPPP2_MOUSE^TPPP2_MOUSE^Q:849-364,H:8-167^50.909%ID^E:3.49e-41^RecName: Full	Tubulin polymerization-promoting protein family member 2 {ECO:0000303|PubMed:30680919}	TRINITY_DN32608_c0_g1_i3.p1	TPPP2_MOUSE^TPPP2_MOUSE^Q:38-199,H:8-167^50.909%ID^E:9.18e-43^RecName: Full=Tubulin polymerization-promoting protein family member 2 {ECO:0000303|PubMed:30680919};^Eukaryota; Metazoa; Chordata; Craniata; Vertebrata; Euteleostomi; Mammalia; Eutheria; Euarchontoglires; Glires; Rodentia; Myomorpha; Muroidea; Muridae; Murinae; Mus; Mus	.	.	ENOG4111H9J^tubulin polymerization-promoting protein family member	KEGG:mmu:219038	GO:0005829^cellular_component^cytosol`GO:0036126^cellular_component^sperm flagellum`GO:0015631^molecular_function^tubulin binding`GO:0030154^biological_process^cell differentiation`GO:0001578^biological_process^microtubule bundle formation`GO:0046785^biological_process^microtubule polymerization`GO:0032273^biological_process^positive regulation of protein polymerization`GO:1901317^biological_proc…	GO:0005829^cellular_component^cytosol`GO:0036126^cellular_component^sperm flagellum`GO:0015631^molecular_function^tubulin binding`GO:0030154^biological_process^cell differentiation`GO:0001578^biological_process^microtubule bundle formation`GO:0046785^biological_process^microtubule polymerization`GO:0032273^biological_process^positive regulation of protein polymerization`GO:1901317^biological_proc…	GO:0005829^cellular_component^cytosol	GO:0036126^cellular_component^sperm flagellum	GO:0015631;GO:0030154;GO:0001578;GO:0046785;GO:0032273;GO:1901317;GO:0007283;	Y	FALSE	FALSE	7.80488	2.43902	7.80488	4.87805	5.85366	10.2439	1.95122	4.39024	14.6341	6.82927	1.46341	0.97561	1.46341	1.95122	4.87805	6.82927	5.85366	5.85366	0	3.90244	100	12.6829	9.7561
>TRINITY_DN32740_c0_g1_i1.p1 TRINITY_DN32740_c0_g1~~TRINITY_DN32740_c0_g1_i1.p1 ORF type:internal len:358 (-),score=47.84 TRINITY_DN32740_c0_g1_i1:2-1072(-)	12.6	498.6	16	6	2	15.69	357	TRINITY_DN32740_c0_g1_i1.p1	TRINITY_DN32740_c0_g1_i1	ADAM9_HUMAN^ADAM9_HUMAN^Q:1039-2,H:33-360^29.023%ID^E:4.9e-34^RecName: Full	Disintegrin and metalloproteinase domain-containing protein 9	TRINITY_DN32740_c0_g1_i1.p1	ADAM9_HUMAN^ADAM9_HUMAN^Q:12-357,H:33-360^29.023%ID^E:4.41e-34^RecName: Full=Disintegrin and metalloproteinase domain-containing protein 9;^Eukaryota; Metazoa; Chordata; Craniata; Vertebrata; Euteleostomi; Mammalia; Eutheria; Euarchontoglires; Primates; Haplorrhini; Catarrhini; Hominidae; Homo	.	.	ENOG410XX2M^ADAM metallopeptidase domain	KEGG:hsa:8754`KO:K06834	GO:0016323^cellular_component^basolateral plasma membrane`GO:0009986^cellular_component^cell surface`GO:0070062^cellular_component^extracellular exosome`GO:0005615^cellular_component^extracellular space`GO:0005925^cellular_component^focal adhesion`GO:0016021^cellular_component^integral component of membrane`GO:0031233^cellular_component^intrinsic component of external side of plasma membrane`GO:0…	GO:0016323^cellular_component^basolateral plasma membrane`GO:0009986^cellular_component^cell surface`GO:0070062^cellular_component^extracellular exosome`GO:0005615^cellular_component^extracellular space`GO:0005925^cellular_component^focal adhesion`GO:0016021^cellular_component^integral component of membrane`GO:0031233^cellular_component^intrinsic component of external side of plasma membrane`GO:0…	GO:0016323^cellular_component^basolateral plasma membrane	GO:0009986^cellular_component^cell surface	GO:0070062;GO:0005615;GO:0005925;GO:0016021;GO:0031233;GO:0005518;GO:0005178;GO:0043236;GO:0046872;GO:0004222;GO:0008237;GO:0005080;GO:0017124;GO:0000186;GO:0007155;GO:0033627;GO:0016477;GO:0033631;GO:0007160;GO:0071222;GO:0007229;GO:0030216;GO:0006509;GO:0042117;GO:0051088;GO:0033630;GO:0051549;GO:0034241;GO:0051044;GO:0050714;GO:0097327;GO:0051592;GO:0051384;GO:0042542;GO:0034616;GO:0010042;GO:…	Y	FALSE	FALSE	7.0028	1.40056	9.2437	5.88235	5.32213	8.68347	4.20168	4.7619	4.7619	5.32213	1.12045	6.72269	3.64146	1.40056	6.72269	6.16246	4.7619	7.56303	1.12045	4.20168	100	15.1261	10.6443
>TRINITY_DN329_c0_g1_i19.p1 TRINITY_DN329_c0_g1~~TRINITY_DN329_c0_g1_i19.p1 ORF type:complete len:493 (-),score=86.40 TRINITY_DN329_c0_g1_i19:119-1597(-)	4.7	421.5	4	3	1	5.89	492	TRINITY_DN329_c0_g1_i19.p1	TRINITY_DN329_c0_g1_i19	FAT3_MOUSE^FAT3_MOUSE^Q:916-680,H:4022-4096^49.367%ID^E:1.22e-15^RecName: Full	Protocadherin Fat 3	TRINITY_DN329_c0_g1_i19.p1	FAT3_MOUSE^FAT3_MOUSE^Q:228-306,H:4022-4096^49.367%ID^E:6.85e-16^RecName: Full=Protocadherin Fat 3;^Eukaryota; Metazoa; Chordata; Craniata; Vertebrata; Euteleostomi; Mammalia; Eutheria; Euarchontoglires; Glires; Rodentia; Myomorpha; Muroidea; Muridae; Murinae; Mus; Mus	.	.	ENOG410XPEI^homophilic cell adhesion	.	GO:0030425^cellular_component^dendrite`GO:0016021^cellular_component^integral component of membrane`GO:0005886^cellular_component^plasma membrane`GO:0005509^molecular_function^calcium ion binding`GO:0000904^biological_process^cell morphogenesis involved in differentiation`GO:0098609^biological_process^cell-cell adhesion`GO:0007156^biological_process^homophilic cell adhesion via plasma membrane ad…	GO:0030425^cellular_component^dendrite`GO:0016021^cellular_component^integral component of membrane`GO:0005886^cellular_component^plasma membrane`GO:0005509^molecular_function^calcium ion binding`GO:0000904^biological_process^cell morphogenesis involved in differentiation`GO:0098609^biological_process^cell-cell adhesion`GO:0007156^biological_process^homophilic cell adhesion via plasma membrane ad…	GO:0030425^cellular_component^dendrite	GO:0016021^cellular_component^integral component of membrane	GO:0005886;GO:0005509;GO:0000904;GO:0098609;GO:0007156;GO:2000171;GO:0001764;GO:0010842	Y	+	FALSE	6.30081	6.70732	4.47154	5.69106	4.87805	10.1626	4.26829	2.43902	6.91057	5.69106	1.01626	6.50407	4.26829	2.64228	4.26829	6.91057	5.4878	3.65854	1.01626	6.70732	100	10.1626	12.6016	SP(Sec/SPI)
>TRINITY_DN33260_c0_g1_i1.p1 TRINITY_DN33260_c0_g1~~TRINITY_DN33260_c0_g1_i1.p1 ORF type:complete len:475 (-),score=78.29 TRINITY_DN33260_c0_g1_i1:384-1808(-)	2.13	366.1	2	2	0	4.85	474	TRINITY_DN33260_c0_g1_i1.p1	TRINITY_DN33260_c0_g1_i1	GSHB_XENLA^GSHB_XENLA^Q:1763-399,H:18-471^45.435%ID^E:2.71e-128^RecName: Full	Glutathione synthetase	TRINITY_DN33260_c0_g1_i1.p1	GSHB_XENLA^GSHB_XENLA^Q:16-473,H:18-474^45.356%ID^E:4.49e-136^RecName: Full=Glutathione synthetase;^Eukaryota; Metazoa; Chordata; Craniata; Vertebrata; Euteleostomi; Amphibia; Batrachia; Anura; Pipoidea; Pipidae; Xenopodinae; Xenopus; Xenopus	.	.	.	KEGG:xla:394329`KO:K21456	GO:0005524^molecular_function^ATP binding`GO:0043295^molecular_function^glutathione binding`GO:0004363^molecular_function^glutathione synthase activity`GO:0000287^molecular_function^magnesium ion binding`GO:0042803^molecular_function^protein homodimerization activity	GO:0005524^molecular_function^ATP binding`GO:0043295^molecular_function^glutathione binding`GO:0004363^molecular_function^glutathione synthase activity`GO:0000287^molecular_function^magnesium ion binding`GO:0042803^molecular_function^protein homodimerization activity	GO:0005524^molecular_function^ATP binding	GO:0043295^molecular_function^glutathione binding	GO:0004363;GO:0000287;GO:0042803;	Y	+	FALSE	7.59494	0.843882	5.06329	9.2827	4.21941	6.96203	1.89873	6.11814	5.48523	10.9705	2.74262	4.00844	3.79747	3.5865	6.11814	8.22785	3.5865	6.75105	0.421941	2.32068	100	14.346	6.96203	OTHER
>TRINITY_DN334_c0_g1_i9.p1 TRINITY_DN334_c0_g1~~TRINITY_DN334_c0_g1_i9.p1 ORF type:complete len:748 (-),score=111.17 TRINITY_DN334_c0_g1_i9:191-2434(-)	11.12	461.5	16	11	1	10.71	747	TRINITY_DN334_c0_g1_i9.p1	TRINITY_DN334_c0_g1_i9	LOX5_HUMAN^LOX5_HUMAN^Q:1432-200,H:269-672^27.553%ID^E:8.52e-45^RecName: Full	Arachidonate 5-lipoxygenase	TRINITY_DN334_c0_g1_i9.p1	LOX5_HUMAN^LOX5_HUMAN^Q:335-745,H:269-672^28.029%ID^E:2.22e-47^RecName: Full=Arachidonate 5-lipoxygenase;^Eukaryota; Metazoa; Chordata; Craniata; Vertebrata; Euteleostomi; Mammalia; Eutheria; Euarchontoglires; Primates; Haplorrhini; Catarrhini; Hominidae; Homo	.	.	ENOG410YN4N^Plant lipoxygenase may be involved in a number of diverse aspects of plant physiology including growth and development, pest resistance, and senescence or responses to wounding (By similarity)	KEGG:hsa:240`KO:K00461	GO:0005829^cellular_component^cytosol`GO:0005576^cellular_component^extracellular region`GO:0005615^cellular_component^extracellular space`GO:1904813^cellular_component^ficolin-1-rich granule lumen`GO:0005635^cellular_component^nuclear envelope`GO:0005641^cellular_component^nuclear envelope lumen`GO:0016363^cellular_component^nuclear matrix`GO:0031965^cellular_component^nuclear membrane`GO:000565…	GO:0005829^cellular_component^cytosol`GO:0005576^cellular_component^extracellular region`GO:0005615^cellular_component^extracellular space`GO:1904813^cellular_component^ficolin-1-rich granule lumen`GO:0005635^cellular_component^nuclear envelope`GO:0005641^cellular_component^nuclear envelope lumen`GO:0016363^cellular_component^nuclear matrix`GO:0031965^cellular_component^nuclear membrane`GO:000565…	GO:0005829^cellular_component^cytosol	GO:0005576^cellular_component^extracellular region	GO:0005615;GO:1904813;GO:0005635;GO:0005641;GO:0016363;GO:0031965;GO:0005654;GO:0034774;GO:0004051;GO:0005506;GO:0019221;GO:0035655;GO:0019370;GO:0006691;GO:0002540;GO:2001301;GO:0019372;GO:0042759;GO:0043312;	Y	+	FALSE	6.15797	2.00803	8.03213	5.48862	5.08701	5.89023	2.00803	5.08701	6.55957	7.76439	1.87416	3.74833	5.08701	5.35475	5.89023	5.22088	6.15797	5.75636	1.60643	5.22088	100	13.5207	11.9143	SP(Sec/SPI)
>TRINITY_DN33596_c0_g1_i4.p1 TRINITY_DN33596_c0_g1~~TRINITY_DN33596_c0_g1_i4.p1 ORF type:complete len:296 (+),score=44.00 TRINITY_DN33596_c0_g1_i4:261-1148(+)	1.28	339.6	2	2	0	4.07	295	TRINITY_DN33596_c0_g1_i4.p1	TRINITY_DN33596_c0_g1_i4	TPRGL_MOUSE^TPRGL_MOUSE^Q:456-1145,H:45-266^31.466%ID^E:1.35e-38^RecName: Full	Tumor protein p63-regulated gene 1-like protein {ECO:0000305}	TRINITY_DN33596_c0_g1_i4.p1	TPRGL_MOUSE^TPRGL_MOUSE^Q:66-295,H:45-266^31.466%ID^E:3.17e-41^RecName: Full=Tumor protein p63-regulated gene 1-like protein {ECO:0000305};^Eukaryota; Metazoa; Chordata; Craniata; Vertebrata; Euteleostomi; Mammalia; Eutheria; Euarchontoglires; Glires; Rodentia; Myomorpha; Muroidea; Muridae; Murinae; Mus; Mus	.	.	ENOG4110AQ3^Tumor protein p63 regulated	KEGG:mmu:67808	GO:0044305^cellular_component^calyx of Held`GO:0030054^cellular_component^cell junction`GO:0005737^cellular_component^cytoplasm`GO:0048786^cellular_component^presynaptic active zone`GO:0008021^cellular_component^synaptic vesicle`GO:0030672^cellular_component^synaptic vesicle membrane`GO:0042802^molecular_function^identical protein binding`GO:0051966^biological_process^regulation of synaptic trans…	GO:0044305^cellular_component^calyx of Held`GO:0030054^cellular_component^cell junction`GO:0005737^cellular_component^cytoplasm`GO:0048786^cellular_component^presynaptic active zone`GO:0008021^cellular_component^synaptic vesicle`GO:0030672^cellular_component^synaptic vesicle membrane`GO:0042802^molecular_function^identical protein binding`GO:0051966^biological_process^regulation of synaptic trans…	GO:0044305^cellular_component^calyx of Held	GO:0030054^cellular_component^cell junction	GO:0005737;GO:0048786;GO:0008021;GO:0030672;GO:0042802;GO:0051966	Y	+	FALSE	8.47458	1.35593	5.42373	7.45763	4.40678	4.40678	2.71186	6.10169	6.10169	7.79661	4.40678	4.74576	6.44068	3.38983	4.74576	8.47458	3.38983	6.10169	1.35593	2.71186	100	12.8814	8.47458	OTHER
>TRINITY_DN3421_c0_g1_i1.p1 TRINITY_DN3421_c0_g1~~TRINITY_DN3421_c0_g1_i1.p1 ORF type:complete len:149 (+),score=24.11 TRINITY_DN3421_c0_g1_i1:111-557(+)	2.97	407	4	2	0	12.84	148	TRINITY_DN3421_c0_g1_i1.p1	TRINITY_DN3421_c0_g1_i1	NXNL2_MOUSE^NXNL2_MOUSE^Q:111-548,H:1-146^36.054%ID^E:2.06e-25^RecName: Full	Nucleoredoxin-like protein 2	TRINITY_DN3421_c0_g1_i1.p1	NXNL2_MOUSE^NXNL2_MOUSE^Q:1-146,H:1-146^36.054%ID^E:8.17e-27^RecName: Full=Nucleoredoxin-like protein 2;^Eukaryota; Metazoa; Chordata; Craniata; Vertebrata; Euteleostomi; Mammalia; Eutheria; Euarchontoglires; Glires; Rodentia; Myomorpha; Muroidea; Muridae; Murinae; Mus; Mus	.	.	ENOG410ZIWC^nucleoredoxin-like	KEGG:mmu:75124`KO:K17609	GO:0045494^biological_process^photoreceptor cell maintenance`GO:0007608^biological_process^sensory perception of smell`GO:0007601^biological_process^visual perception	GO:0045494^biological_process^photoreceptor cell maintenance`GO:0007608^biological_process^sensory perception of smell`GO:0007601^biological_process^visual perception	GO:0045494^biological_process^photoreceptor cell maintenance	GO:0007608^biological_process^sensory perception of smell	GO:0007601;	Y	+	FALSE	12.8378	2.02703	7.43243	6.08108	4.05405	6.75676	3.37838	2.7027	9.45946	8.10811	1.35135	1.35135	4.72973	4.72973	1.35135	8.78378	2.02703	8.10811	2.02703	2.7027	100	13.5135	8.78378	OTHER
>TRINITY_DN34749_c0_g1_i1.p1 TRINITY_DN34749_c0_g1~~TRINITY_DN34749_c0_g1_i1.p1 ORF type:internal len:341 (-),score=67.18 TRINITY_DN34749_c0_g1_i1:3-1022(-)	4.69	496.6	3	3	2	7.06	340	TRINITY_DN34749_c0_g1_i1.p1	TRINITY_DN34749_c0_g1_i1	SVEP1_RAT^SVEP1_RAT^Q:938-12,H:1192-1496^44.839%ID^E:4.83e-79^RecName: Full	Sushi, von Willebrand factor type A, EGF and pentraxin domain-containing protein 1	TRINITY_DN34749_c0_g1_i1.p1	SVEP1_RAT^SVEP1_RAT^Q:29-337,H:1192-1496^44.839%ID^E:4.35e-79^RecName: Full=Sushi, von Willebrand factor type A, EGF and pentraxin domain-containing protein 1;^Eukaryota; Metazoa; Chordata; Craniata; Vertebrata; Euteleostomi; Mammalia; Eutheria; Euarchontoglires; Glires; Rodentia; Myomorpha; Muroidea; Muridae; Murinae; Rattus	.	.	ENOG410XPJ1^c-type lectin domain family	.	GO:0005737^cellular_component^cytoplasm`GO:0005576^cellular_component^extracellular region`GO:0016020^cellular_component^membrane`GO:0005509^molecular_function^calcium ion binding`GO:0003682^molecular_function^chromatin binding`GO:0007155^biological_process^cell adhesion	GO:0005737^cellular_component^cytoplasm`GO:0005576^cellular_component^extracellular region`GO:0016020^cellular_component^membrane`GO:0005509^molecular_function^calcium ion binding`GO:0003682^molecular_function^chromatin binding`GO:0007155^biological_process^cell adhesion	GO:0005737^cellular_component^cytoplasm	GO:0005576^cellular_component^extracellular region	GO:0016020;GO:0005509;GO:0003682;GO:0007155	Y	FALSE	FALSE	7.05882	11.4706	5.29412	5.29412	3.23529	11.4706	1.47059	1.76471	5.29412	3.23529	0.882353	8.23529	4.11765	2.94118	2.64706	10.2941	5.88235	5.58824	0.588235	3.23529	100	10.5882	7.05882
>TRINITY_DN3569_c0_g1_i1.p1 TRINITY_DN3569_c0_g1~~TRINITY_DN3569_c0_g1_i1.p1 ORF type:complete len:934 (+),score=223.01 TRINITY_DN3569_c0_g1_i1:50-2851(+)	8.95	486.9	10	9	3	9.32	933	TRINITY_DN3569_c0_g1_i1.p1	TRINITY_DN3569_c0_g1_i1	TYRDC_LACBR^TYRDC_LACBR^Q:101-1555,H:13-466^32.727%ID^E:1.89e-71^RecName: Full	L-tyrosine decarboxylase {ECO:0000303|PubMed:24211777}	TRINITY_DN3569_c0_g1_i1.p1	TYRDC_LACBR^TYRDC_LACBR^Q:18-502,H:13-466^32.727%ID^E:1.18e-72^RecName: Full=L-tyrosine decarboxylase {ECO:0000303|PubMed:24211777};^Bacteria; Firmicutes; Bacilli; Lactobacillales; Lactobacillaceae; Lactobacillus	.	.	COG0076^decarboxylase	.	GO:0036468^molecular_function^L-dopa decarboxylase activity`GO:0030170^molecular_function^pyridoxal phosphate binding`GO:0004837^molecular_function^tyrosine decarboxylase activity`GO:0019752^biological_process^carboxylic acid metabolic process	GO:0036468^molecular_function^L-dopa decarboxylase activity`GO:0030170^molecular_function^pyridoxal phosphate binding`GO:0004837^molecular_function^tyrosine decarboxylase activity`GO:0019752^biological_process^carboxylic acid metabolic process	GO:0036468^molecular_function^L-dopa decarboxylase activity	GO:0030170^molecular_function^pyridoxal phosphate binding	GO:0004837;GO:0019752	Y	+	FALSE	6.85959	1.7149	5.78778	5.57342	4.50161	7.07395	3.4298	5.57342	6.00214	7.71704	3.53698	4.82315	5.25188	3.10825	4.18006	4.82315	6.75241	8.46731	1.07181	3.75134	100	11.3612	9.32476	OTHER
>TRINITY_DN3569_c0_g1_i20.p1 TRINITY_DN3569_c0_g1~~TRINITY_DN3569_c0_g1_i20.p1 ORF type:3prime_partial len:874 (+),score=200.32 TRINITY_DN3569_c0_g1_i20:50-2668(+)	3.81	405.4	3	2	1	3.67	873	TRINITY_DN3569_c0_g1_i20.p1	TRINITY_DN3569_c0_g1_i20	TYRDC_LACBR^TYRDC_LACBR^Q:101-1555,H:13-466^33.131%ID^E:1.33e-74^RecName: Full	L-tyrosine decarboxylase {ECO:0000303|PubMed:24211777}	TRINITY_DN3569_c0_g1_i20.p1	TYRDC_LACBR^TYRDC_LACBR^Q:18-502,H:13-466^33.131%ID^E:1.04e-74^RecName: Full=L-tyrosine decarboxylase {ECO:0000303|PubMed:24211777};^Bacteria; Firmicutes; Bacilli; Lactobacillales; Lactobacillaceae; Lactobacillus	.	.	COG0076^decarboxylase	.	GO:0036468^molecular_function^L-dopa decarboxylase activity`GO:0030170^molecular_function^pyridoxal phosphate binding`GO:0004837^molecular_function^tyrosine decarboxylase activity`GO:0019752^biological_process^carboxylic acid metabolic process	GO:0036468^molecular_function^L-dopa decarboxylase activity`GO:0030170^molecular_function^pyridoxal phosphate binding`GO:0004837^molecular_function^tyrosine decarboxylase activity`GO:0019752^biological_process^carboxylic acid metabolic process	GO:0036468^molecular_function^L-dopa decarboxylase activity	GO:0030170^molecular_function^pyridoxal phosphate binding	GO:0004837;GO:0019752	Y	FALSE	+	7.90378	2.06186	6.87285	6.18557	4.00916	6.07102	3.20733	5.38373	5.84192	8.24742	3.43643	4.5819	5.26919	2.97824	4.12371	4.69645	6.9874	7.44559	0.91638	3.78007	100	13.0584	8.70561
>TRINITY_DN3642_c0_g1_i15.p1 TRINITY_DN3642_c0_g1~~TRINITY_DN3642_c0_g1_i15.p1 ORF type:complete len:159 (+),score=31.50 TRINITY_DN3642_c0_g1_i15:104-580(+)	4.76	543.4	5	3	1	17.72	158	TRINITY_DN3642_c0_g1_i15.p1	TRINITY_DN3642_c0_g1_i15	ARC3A_XENLA^ARC3A_XENLA^Q:104-571,H:1-158^66.667%ID^E:8.01e-68^RecName: Full	Actin-related protein 2/3 complex subunit 3-A	TRINITY_DN3642_c0_g1_i15.p1	ARC3A_XENLA^ARC3A_XENLA^Q:1-156,H:1-158^66.667%ID^E:4.65e-70^RecName: Full=Actin-related protein 2/3 complex subunit 3-A;^Eukaryota; Metazoa; Chordata; Craniata; Vertebrata; Euteleostomi; Amphibia; Batrachia; Anura; Pipoidea; Pipidae; Xenopodinae; Xenopus; Xenopus	.	.	.	KEGG:xla:100036831`KO:K05756	GO:0005885^cellular_component^Arp2/3 protein complex`GO:0042995^cellular_component^cell projection`GO:0005737^cellular_component^cytoplasm`GO:0005634^cellular_component^nucleus`GO:0035861^cellular_component^site of double-strand break`GO:0003779^molecular_function^actin binding`GO:0034314^biological_process^Arp2/3 complex-mediated actin nucleation	GO:0005885^cellular_component^Arp2/3 protein complex`GO:0042995^cellular_component^cell projection`GO:0005737^cellular_component^cytoplasm`GO:0005634^cellular_component^nucleus`GO:0035861^cellular_component^site of double-strand break`GO:0003779^molecular_function^actin binding`GO:0034314^biological_process^Arp2/3 complex-mediated actin nucleation	GO:0005885^cellular_component^Arp2/3 protein complex	GO:0042995^cellular_component^cell projection	GO:0005737;GO:0005634;GO:0035861;GO:0003779;GO:0034314;	Y	+	FALSE	8.22785	1.89873	4.43038	4.43038	5.06329	5.06329	0.632911	4.43038	8.22785	10.7595	3.79747	6.32911	8.22785	4.43038	3.79747	6.96203	4.43038	4.43038	0	4.43038	100	8.86076	9.49367	OTHER
>TRINITY_DN3644_c1_g1_i6.p1 TRINITY_DN3644_c1_g1~~TRINITY_DN3644_c1_g1_i6.p1 ORF type:complete len:962 (-),score=77.80 TRINITY_DN3644_c1_g1_i6:477-3362(-)	1.36	296.1	66	2	1	1.56	961	TRINITY_DN3644_c1_g1_i6.p1	TRINITY_DN3644_c1_g1_i6	EPHA4_MOUSE^EPHA4_MOUSE^Q:3185-495,H:79-979^37.946%ID^E:0^RecName: Full	Ephrin type-A receptor 4	TRINITY_DN3644_c1_g1_i6.p1	EPHA4_CHICK^EPHA4_CHICK^Q:32-956,H:45-979^37.877%ID^E:0^RecName: Full=Ephrin type-A receptor 4;^Eukaryota; Metazoa; Chordata; Craniata; Vertebrata; Euteleostomi; Archelosauria; Archosauria; Dinosauria; Saurischia; Theropoda; Coelurosauria; Aves; Neognathae; Galloanserae; Galliformes; Phasianidae; Phasianinae; Gallus	.	ExpAA=24.53^PredHel=1^Topology=o527-549i	COG0515^Serine Threonine protein kinase	KEGG:gga:395559`KO:K05105	GO:0005912^cellular_component^adherens junction`GO:0030424^cellular_component^axon`GO:0043679^cellular_component^axon terminus`GO:0044295^cellular_component^axonal growth cone`GO:0044297^cellular_component^cell body`GO:0042995^cellular_component^cell projection`GO:0009986^cellular_component^cell surface`GO:0005737^cellular_component^cytoplasm`GO:0030425^cellular_component^dendrite`GO:0043198^cell…	GO:0005912^cellular_component^adherens junction`GO:0030424^cellular_component^axon`GO:0005737^cellular_component^cytoplasm`GO:0043197^cellular_component^dendritic spine`GO:0031901^cellular_component^early endosome membrane`GO:0098978^cellular_component^glutamatergic synapse`GO:0005887^cellular_component^integral component of plasma membrane`GO:0099055^cellular_component^integral component of post…	GO:0005912^cellular_component^adherens junction	GO:0030424^cellular_component^axon	GO:0005737;GO:0043197;GO:0031901;GO:0098978;GO:0005887;GO:0099055;GO:0099056;GO:0043005;GO:0005886;GO:0043235;GO:0098685;GO:0005524;GO:0097161;GO:0005004;GO:0042802;GO:0042731;GO:0004672;GO:1990782;GO:0004714;GO:0005005;GO:0007628;GO:0007411;GO:0007155;GO:1904646;GO:0090102;GO:0021957;GO:0097156;GO:0097155;GO:0008045;GO:0048681;GO:1900272;GO:1903051;GO:0072178;GO:0018108;GO:1902004;GO:1902961;GO:…	Y	+	FALSE	7.18002	3.12175	4.57856	5.20291	3.43392	7.07596	2.39334	5.7232	5.61915	8.2206	2.18522	5.09886	4.57856	3.22581	6.34755	7.4922	7.70031	6.2435	1.87305	2.70552	100	9.78148	8.01249	SP(Sec/SPI)
>TRINITY_DN3673_c0_g1_i1.p1 TRINITY_DN3673_c0_g1~~TRINITY_DN3673_c0_g1_i1.p1 ORF type:complete len:270 (-),score=12.08 TRINITY_DN3673_c0_g1_i1:826-1635(-)	2.33	378.9	2	2	0	5.58	269	TRINITY_DN3673_c0_g1_i1.p1	TRINITY_DN3673_c0_g1_i1	MLECA_XENLA^MLECA_XENLA^Q:1599-850,H:11-269^50.385%ID^E:1.54e-73^RecName: Full	Malectin-A	TRINITY_DN3673_c0_g1_i1.p1	MLECA_XENLA^MLECA_XENLA^Q:13-269,H:11-276^52.434%ID^E:8.71e-90^RecName: Full=Malectin-A;^Eukaryota; Metazoa; Chordata; Craniata; Vertebrata; Euteleostomi; Amphibia; Batrachia; Anura; Pipoidea; Pipidae; Xenopodinae; Xenopus; Xenopus	.	ExpAA=33.45^PredHel=1^Topology=o248-267i	.	KEGG:xla:432306	GO:0005783^cellular_component^endoplasmic reticulum`GO:0005789^cellular_component^endoplasmic reticulum membrane`GO:0016021^cellular_component^integral component of membrane`GO:0016020^cellular_component^membrane`GO:0030246^molecular_function^carbohydrate binding`GO:0005975^biological_process^carbohydrate metabolic process`GO:0006487^biological_process^protein N-linked glycosylation	GO:0005783^cellular_component^endoplasmic reticulum`GO:0005789^cellular_component^endoplasmic reticulum membrane`GO:0016021^cellular_component^integral component of membrane`GO:0016020^cellular_component^membrane`GO:0030246^molecular_function^carbohydrate binding`GO:0005975^biological_process^carbohydrate metabolic process`GO:0006487^biological_process^protein N-linked glycosylation	GO:0005783^cellular_component^endoplasmic reticulum	GO:0005789^cellular_component^endoplasmic reticulum membrane	GO:0016021;GO:0016020;GO:0030246;GO:0005975;GO:0006487;	Y	+	FALSE	5.57621	1.48699	8.17844	6.3197	5.94796	7.43494	3.34572	6.3197	5.57621	8.55019	1.48699	3.34572	5.94796	1.85874	3.71747	5.20446	5.20446	9.66543	0	4.83271	100	14.4981	10.7807	SP(Sec/SPI)
>TRINITY_DN3719_c2_g1_i2.p1 TRINITY_DN3719_c2_g1~~TRINITY_DN3719_c2_g1_i2.p1 ORF type:5prime_partial len:744 (-),score=113.83 TRINITY_DN3719_c2_g1_i2:226-2457(-)	1.98	463.9	2	2	1	3.1	743	TRINITY_DN3719_c2_g1_i2.p1	TRINITY_DN3719_c2_g1_i2	FBN1_BOVIN^FBN1_BOVIN^Q:2436-592,H:925-1653^34.818%ID^E:9.6e-89^RecName: Full	Fibrillin-1 {ECO:0000250|UniProtKB:P35555}	TRINITY_DN3719_c2_g1_i2.p1	FBN1_BOVIN^FBN1_BOVIN^Q:8-622,H:925-1653^34.818%ID^E:1.16e-89^RecName: Full=Fibrillin-1 {ECO:0000250|UniProtKB:P35555};^Eukaryota; Metazoa; Chordata; Craniata; Vertebrata; Euteleostomi; Mammalia; Eutheria; Laurasiatheria; Artiodactyla; Ruminantia; Pecora; Bovidae; Bovinae; Bos	.	.	ENOG410XSTY^Latent transforming growth factor beta binding protein 2	KEGG:bta:281154`KO:K06825	GO:0031012^cellular_component^extracellular matrix`GO:0005576^cellular_component^extracellular region`GO:0005615^cellular_component^extracellular space`GO:0001527^cellular_component^microfibril`GO:0005509^molecular_function^calcium ion binding`GO:0005201^molecular_function^extracellular matrix structural constituent`GO:0008201^molecular_function^heparin binding`GO:0005179^molecular_function^hormo…	GO:0031012^cellular_component^extracellular matrix`GO:0005576^cellular_component^extracellular region`GO:0005615^cellular_component^extracellular space`GO:0001527^cellular_component^microfibril`GO:0005509^molecular_function^calcium ion binding`GO:0005201^molecular_function^extracellular matrix structural constituent`GO:0008201^molecular_function^heparin binding`GO:0005179^molecular_function^hormo…	GO:0031012^cellular_component^extracellular matrix	GO:0005576^cellular_component^extracellular region	GO:0005615;GO:0001527;GO:0005509;GO:0005201;GO:0008201;GO:0005179;GO:0034199;GO:0042593;GO:0006006;GO:0010737	Y	FALSE	FALSE	3.9031	13.3244	7.94078	6.99865	2.5572	9.69044	3.36474	3.49933	3.36474	3.49933	0.403769	6.99865	4.03769	4.17227	4.17227	6.32571	7.40242	4.44145	0.538358	3.36474	100	14.9394	6.4603
>TRINITY_DN382_c0_g1_i1.p1 TRINITY_DN382_c0_g1~~TRINITY_DN382_c0_g1_i1.p1 ORF type:complete len:876 (-),score=151.75 TRINITY_DN382_c0_g1_i1:7-2634(-)	26.09	507.8	19	14	7	14.29	875	TRINITY_DN382_c0_g1_i1.p1	TRINITY_DN382_c0_g1_i1	MUC2_HUMAN^MUC2_HUMAN^Q:2754-502,H:401-1121^27.378%ID^E:2.62e-60^RecName: Full	Mucin-2	TRINITY_DN382_c0_g1_i1.p1	MUC2_HUMAN^MUC2_HUMAN^Q:59-711,H:489-1121^28.424%ID^E:7.64e-59^RecName: Full=Mucin-2;^Eukaryota; Metazoa; Chordata; Craniata; Vertebrata; Euteleostomi; Mammalia; Eutheria; Euarchontoglires; Primates; Haplorrhini; Catarrhini; Hominidae; Homo	tr|A0A3M6UYL5|A0A3M6UYL5_9CNID^tr|A0A3M6UYL5|A0A3M6UYL5_9CNID^Q:58-549,H:1-141^71.341%ID^E:4.13e-77^.^.	.	ENOG410YA0C^C8 domain	.	GO:0062023^cellular_component^collagen-containing extracellular matrix`GO:0005796^cellular_component^Golgi lumen`GO:0070702^cellular_component^inner mucus layer`GO:0070703^cellular_component^outer mucus layer`GO:0005886^cellular_component^plasma membrane`GO:0030277^biological_process^maintenance of gastrointestinal epithelium`GO:0016266^biological_process^O-glycan processing`GO:0002223^biological…	GO:0062023^cellular_component^collagen-containing extracellular matrix`GO:0005796^cellular_component^Golgi lumen`GO:0070702^cellular_component^inner mucus layer`GO:0070703^cellular_component^outer mucus layer`GO:0005886^cellular_component^plasma membrane`GO:0030277^biological_process^maintenance of gastrointestinal epithelium`GO:0016266^biological_process^O-glycan processing`GO:0002223^biological…	GO:0062023^cellular_component^collagen-containing extracellular matrix	GO:0005796^cellular_component^Golgi lumen	GO:0070702;GO:0070703;GO:0005886;GO:0030277;GO:0016266;GO:0002223	Y	+	FALSE	6.51429	7.88571	7.31429	6.17143	4	6.85714	1.6	3.54286	6.85714	5.25714	1.48571	4.45714	5.14286	4	4.68571	9.6	4.22857	5.82857	1.02857	3.54286	100	13.4857	8.57143	OTHER
[truncated: 180 more rows]
[truncated: 15 more columns]

## Sheet: Stichopathes Cleaned Once
	Proteomics								Annotation													Fraction	Completeness		Amino Acid Composition																							Signal Peptide
[truncated: 136 more rows]
[truncated: 9 more columns]

## Sheet: Stichopathes Cleaned Twice
	Proteomics								Annotation													Fraction	Completeness		Amino Acid Composition																							Signal Peptide
[truncated: 167 more rows]
[truncated: 10 more columns]
