# Supplementary material for: Proteomic Profiling of Black Coral (Antipatharia) Skeleton Reveals Hundreds of Skeleton-Associated Proteins Across Two Taxa
Source: Frontiers journal article supplement (doi:10.3389/fmars.2022.904835), 2022-06-30
Supplement: Table_3.XLSX [file Table_3.XLSX]

## Sheet: StichovAnti_in_AntivSticho
Query	Subject	% Identity	length	mismatch	gapopen	qstart	qend	sstart	send	e-value	bitscore	Fraction
DN10018_c0_g1_DN10018_c0_g1_i2_g40557	TRINITY_DN8071_c0_g1_i4.p1	90.87	230	20	1	137	365	1	230	2.6899999999999998E-152	431	Sticho1xClean
DN1036_c0_g2_DN1036_c0_g2_i1_g104529	TRINITY_DN502_c0_g1_i3.p1	100	191	0	0	1	191	1	191	2.2300000000000002E-137	381	Sticho1xClean
DN16795_c0_g1_DN16795_c0_g1_i3_g119604	TRINITY_DN656_c0_g1_i8.p1	94	200	12	0	1	200	1	200	1.5700000000000001E-141	393	Sticho1xClean
DN168_c0_g1_DN168_c0_g1_i12_g76555	TRINITY_DN5031_c0_g1_i2.p1	97.114000000000004	589	17	0	32	620	1	589	0	1186	Sticho1xClean
DN1772_c0_g1_DN1772_c0_g1_i9_g72338	TRINITY_DN1513_c0_g1_i5.p1	93.32	973	63	1	268	1240	1	971	0	1764	Sticho1xClean
DN1853_c0_g1_DN1853_c0_g1_i7_g102319	TRINITY_DN4164_c0_g2_i1.p1	99.605000000000004	506	2	0	1	506	25	530	0	1001	Sticho1xClean
DN2216_c0_g1_DN2216_c0_g1_i2_g113162	TRINITY_DN36455_c0_g1_i3.p1	96.429000000000002	420	14	1	1	420	24	442	0	771	Sticho1xClean
DN228_c1_g1_DN228_c1_g1_i2_g30839	TRINITY_DN49660_c1_g1_i4.p1	96.248999999999995	1253	47	0	1	1253	1	1253	0	2512	Sticho1xClean
DN2345_c0_g1_DN2345_c0_g1_i10_g61734	TRINITY_DN10301_c0_g1_i3.p1	89.332999999999998	525	27	3	6	528	1	498	0	856	Sticho1xClean
DN26_c0_g1_DN26_c0_g1_i3_g3085	TRINITY_DN507_c0_g1_i20.p1	76.338999999999999	672	151	3	1	667	244	912	0	941	Sticho1xClean
DN277_c0_g1_DN277_c0_g1_i5_g32030	TRINITY_DN6292_c0_g1_i1.p1	98.194000000000003	609	11	0	326	934	1	609	0	1238	Sticho1xClean
DN357_c0_g2_DN357_c0_g2_i11_g106115	TRINITY_DN598_c0_g1_i2.p1	82.906000000000006	351	41	1	2	333	5	355	0	583	Sticho1xClean
DN360_c0_g1_DN360_c0_g1_i8_g104967	TRINITY_DN5790_c0_g1_i14.p1	92.683000000000007	164	12	0	7	170	4	167	2.6199999999999999E-102	299	Sticho1xClean
DN37267_c0_g1_DN37267_c0_g1_i4_g62755	TRINITY_DN14331_c0_g1_i1.p1	86.4	250	34	0	1	250	1	250	2.0899999999999999E-153	427	Sticho1xClean
DN3812_c0_g1_DN3812_c0_g1_i2_g4515	TRINITY_DN7289_c0_g1_i7.p1	98.744	2149	27	0	1	2149	1	2149	0	4213	Sticho1xClean
DN3834_c0_g1_DN3834_c0_g1_i2_g4618	TRINITY_DN11770_c0_g2_i6.p1	98.238	227	4	0	5	231	2	228	5.3600000000000004E-165	454	Sticho1xClean
DN43959_c0_g1_DN43959_c0_g1_i1_g68198	TRINITY_DN42621_c0_g1_i1.p1	88.838999999999999	224	25	0	66	289	1	224	2.9700000000000001E-133	391	Sticho1xClean
DN4565_c0_g1_DN4565_c0_g1_i1_g24674	TRINITY_DN4697_c1_g1_i4.p1	95.81	358	14	1	105	461	1	358	0	674	Sticho1xClean
DN4625_c0_g1_DN4625_c0_g1_i1_g99150	TRINITY_DN2941_c0_g1_i1.p1	97.195999999999998	214	6	0	33	246	1	214	1.46E-152	423	Sticho1xClean
DN4640_c0_g1_DN4640_c0_g1_i1_g99431	TRINITY_DN11187_c0_g2_i3.p1	86.307000000000002	241	27	1	1	235	43	283	7.3000000000000003E-155	431	Sticho1xClean
DN5014_c0_g1_DN5014_c0_g1_i1_g109029	TRINITY_DN10484_c0_g1_i1.p1	97.11	173	5	0	1	173	37	209	6.5400000000000007E-126	352	Sticho1xClean
DN5232_c0_g1_DN5232_c0_g1_i1_g42288	TRINITY_DN26948_c0_g1_i2.p1	96.707999999999998	243	8	0	33	275	1	243	1.37E-158	441	Sticho1xClean
DN6324_c0_g1_DN6324_c0_g1_i1_g67217	TRINITY_DN35252_c0_g1_i1.p1	96.375	331	12	0	3	333	38	368	0	669	Sticho1xClean
DN7752_c0_g1_DN7752_c0_g1_i16_g56138	TRINITY_DN1399_c0_g1_i7.p1	88.525000000000006	244	28	0	1	244	1	244	5.0399999999999999E-153	425	Sticho1xClean
DN863_c0_g1_DN863_c0_g1_i21_g15550	TRINITY_DN1491_c0_g1_i1.p1	81.954999999999998	399	72	0	284	682	12	410	0	662	Sticho1xClean
DN1027_c0_g1_DN1027_c0_g1_i4_g103494	TRINITY_DN7696_c0_g1_i3.p1	96.802000000000007	344	11	0	536	879	29	372	0	699	StichoBoth
DN111_c0_g1_DN111_c0_g1_i4_g76705	TRINITY_DN261_c0_g1_i6.p1	88.272000000000006	648	76	0	382	1029	1	648	0	1177	StichoBoth
DN11341_c0_g1_DN11341_c0_g1_i1_g98710	TRINITY_DN56331_c0_g1_i2.p1	76.561999999999998	192	45	0	1	192	1	192	8.2199999999999998E-113	319	StichoBoth
DN1206_c10_g1_DN1206_c10_g1_i1_g86263	TRINITY_DN44558_c0_g4_i1.p1	100	146	0	0	1	146	7	152	4.7600000000000003E-108	303	StichoBoth
DN1228_c0_g1_DN1228_c0_g1_i3_g85341	TRINITY_DN10934_c1_g2_i2.p1	93.271000000000001	431	29	0	1542	1972	2	432	0	805	StichoBoth
DN1467_c2_g1_DN1467_c2_g1_i3_g63655	TRINITY_DN134_c0_g2_i1.p1	99.402000000000001	1505	9	0	1	1505	289	1793	0	3034	StichoBoth
DN16324_c0_g1_DN16324_c0_g1_i1_g13613	TRINITY_DN43166_c0_g2_i4.p1	97.516999999999996	604	15	0	1	604	1	604	0	1234	StichoBoth
DN16795_c0_g1_DN16795_c0_g1_i1_g119606	TRINITY_DN10319_c0_g1_i1.p1	95.858000000000004	169	7	0	18	186	6	174	2.9999999999999999E-121	340	StichoBoth
DN1746_c0_g1_DN1746_c0_g1_i1_g71458	TRINITY_DN6629_c0_g1_i2.p1	97.912999999999997	623	13	0	1	623	1	623	0	1257	StichoBoth
DN17483_c0_g1_DN17483_c0_g1_i2_g117071	TRINITY_DN273_c0_g1_i1.p1	30.803999999999998	659	350	29	23	635	149	747	7.5399999999999996E-59	216	StichoBoth
DN1932_c0_g1_DN1932_c0_g1_i7_g54941	TRINITY_DN2984_c0_g1_i4.p1	98.918999999999997	2959	32	0	1	2959	1	2959	0	5934	StichoBoth
DN20341_c0_g1_DN20341_c0_g1_i3_g97666	TRINITY_DN8091_c0_g1_i2.p1	96.822000000000003	472	15	0	16	487	1	472	0	950	StichoBoth
DN2042_c0_g1_DN2042_c0_g1_i2_g8370	TRINITY_DN21208_c0_g1_i1.p1	92.171999999999997	792	56	2	350	1141	1	786	0	1457	StichoBoth
DN2096_c0_g1_DN2096_c0_g1_i6_g8413	TRINITY_DN11012_c0_g1_i1.p1	97.445999999999998	1057	27	0	857	1913	1	1057	0	2162	StichoBoth
DN209_c0_g1_DN209_c0_g1_i2_g31743	TRINITY_DN6024_c0_g1_i2.p1	92.981999999999999	1083	75	1	422	1503	1	1083	0	1537	StichoBoth
DN209_c0_g2_DN209_c0_g2_i2_g31770	TRINITY_DN6024_c1_g1_i9.p1	91.259	1453	124	2	1	1450	1	1453	0	2118	StichoBoth
DN21807_c0_g1_DN21807_c0_g1_i3_g34345	TRINITY_DN168_c1_g1_i4.p1	98.373999999999995	369	6	0	30	398	1	369	0	752	StichoBoth
DN21_c0_g4_DN21_c0_g4_i1_g3027	TRINITY_DN878_c0_g2_i3.p1	88	350	40	2	29	377	1	349	0	622	StichoBoth
DN2366_c0_g1_DN2366_c0_g1_i2_g62183	TRINITY_DN3769_c0_g1_i7.p1	98.149000000000001	2809	48	1	1	2805	1	2809	0	5424	StichoBoth
DN2512_c0_g1_DN2512_c0_g1_i4_g45459	TRINITY_DN980_c1_g1_i3.p1	89.495999999999995	1647	165	4	100	1742	1	1643	0	2132	StichoBoth
DN268_c5_g1_DN268_c5_g1_i1_g30863	TRINITY_DN1157_c0_g1_i1.p1	86.052000000000007	423	45	1	1	409	3	425	0	737	StichoBoth
DN272_c16_g1_DN272_c16_g1_i2_g32023	TRINITY_DN13319_c0_g1_i2.p1	92.991	214	13	2	2	214	3	215	7.9300000000000004E-143	397	StichoBoth
DN28715_c0_g1_DN28715_c0_g1_i6_g937	TRINITY_DN15419_c0_g1_i10.p1	62.765999999999998	282	104	1	113	393	1	282	9.8300000000000008E-118	345	StichoBoth
DN29130_c0_g1_DN29130_c0_g1_i1_g19681	TRINITY_DN10182_c0_g1_i1.p1	68.272999999999996	249	45	3	1	249	25	239	8.0799999999999991E-118	336	StichoBoth
DN295_c0_g1_DN295_c0_g1_i5_g31922	TRINITY_DN3033_c0_g1_i4.p1	92.480999999999995	133	10	0	1	133	1	133	5.6500000000000001E-83	239	StichoBoth
DN3118_c0_g1_DN3118_c0_g1_i3_g38001	TRINITY_DN8297_c0_g1_i1.p1	95.275999999999996	889	42	0	78	966	1	889	0	1752	StichoBoth
DN3307_c0_g1_DN3307_c0_g1_i2_g91834	TRINITY_DN3751_c0_g1_i1.p1	95.283000000000001	1378	65	0	1	1378	1	1378	0	1780	StichoBoth
DN348_c0_g1_DN348_c0_g1_i20_g105236	TRINITY_DN329_c0_g1_i19.p1	91.885999999999996	493	40	0	1	493	1	493	0	949	StichoBoth
DN35676_c0_g1_DN35676_c0_g1_i1_g67356	TRINITY_DN10207_c0_g1_i1.p1	97.8	409	7	2	1	408	1	408	0	800	StichoBoth
DN3883_c0_g1_DN3883_c0_g1_i2_g4966	TRINITY_DN530_c2_g1_i19.p1	93.899000000000001	1344	79	3	1	1343	1	1342	0	2519	StichoBoth
DN3898_c0_g1_DN3898_c0_g1_i5_g4793	TRINITY_DN56015_c0_g1_i6.p2	93.007000000000005	143	10	0	143	285	1	143	2.0899999999999999E-92	270	StichoBoth
DN39562_c0_g1_DN39562_c0_g1_i5_g73233	TRINITY_DN934_c0_g1_i4.p1	90.951999999999998	210	19	0	1	210	1	210	6.8600000000000003E-144	399	StichoBoth
DN3976_c0_g2_DN3976_c0_g2_i2_g33881	TRINITY_DN21906_c0_g2_i4.p1	76.301000000000002	173	35	2	99	266	1	172	1.12E-82	246	StichoBoth
DN4023_c0_g1_DN4023_c0_g1_i1_g35045	TRINITY_DN5412_c0_g1_i4.p1	98.186999999999998	662	12	0	1	662	42	703	0	1348	StichoBoth
DN4091_c0_g1_DN4091_c0_g1_i4_g34642	TRINITY_DN2887_c0_g1_i7.p1	97.206999999999994	1611	45	0	1	1611	1	1611	0	2899	StichoBoth
DN41992_c0_g1_DN41992_c0_g1_i2_g90602	TRINITY_DN49056_c0_g1_i1.p2	91.2	125	11	0	1	125	45	169	9.9100000000000006E-79	230	StichoBoth
DN4322_c0_g1_DN4322_c0_g1_i2_g43308	TRINITY_DN3231_c0_g1_i1.p1	96.808999999999997	752	24	0	1665	2416	1	752	0	1492	StichoBoth
DN44765_c0_g1_DN44765_c0_g1_i4_g66584	TRINITY_DN334_c0_g1_i2.p1	91.31	748	65	0	1	748	1	748	0	1417	StichoBoth
DN460_c0_g1_DN460_c0_g1_i11_g9906	TRINITY_DN2314_c1_g1_i7.p1	96.396000000000001	555	17	2	1	553	1	554	0	1048	StichoBoth
DN4703_c0_g1_DN4703_c0_g1_i5_g1283	TRINITY_DN570_c0_g2_i2.p1	93.320999999999998	1063	71	0	530	1592	1	1063	0	1487	StichoBoth
DN52404_c0_g2_DN52404_c0_g2_i3_g55310	TRINITY_DN16272_c0_g1_i2.p1	91.667000000000002	252	19	1	12	263	1	250	1.7199999999999999E-110	318	StichoBoth
DN588_c1_g1_DN588_c1_g1_i4_g82432	TRINITY_DN8482_c0_g1_i1.p1	97.947000000000003	487	10	0	1	487	1	487	0	994	StichoBoth
DN60605_c0_g1_DN60605_c0_g1_i1_g55574	TRINITY_DN1469_c0_g1_i1.p1	98.230999999999995	2035	31	1	253	2287	1	2030	0	4030	StichoBoth
DN60890_c0_g1_DN60890_c0_g1_i1_g87043	TRINITY_DN10314_c0_g1_i4.p1	90.78	141	13	0	25	165	1	141	1.01E-93	268	StichoBoth
DN63286_c0_g1_DN63286_c0_g1_i7_g34449	TRINITY_DN10028_c0_g1_i1.p1	99.67	303	1	0	52	354	5	307	0	617	StichoBoth
DN648_c1_g1_DN648_c1_g1_i10_g36676	TRINITY_DN6046_c0_g1_i1.p1	80.843000000000004	261	43	3	26	283	42	298	6.2300000000000001E-151	424	StichoBoth
DN6570_c0_g1_DN6570_c0_g1_i2_g49053	TRINITY_DN2876_c0_g1_i7.p1	98.388999999999996	993	16	0	1	993	1	993	0	2026	StichoBoth
DN7147_c0_g1_DN7147_c0_g1_i4_g116117	TRINITY_DN1535_c0_g1_i8.p1	93.314999999999998	359	24	0	1	359	25	383	0	711	StichoBoth
DN7187_c0_g1_DN7187_c0_g1_i4_g116238	TRINITY_DN60847_c0_g1_i7.p1	93.128	1397	93	1	1	1394	1	1397	0	1903	StichoBoth
DN8038_c0_g1_DN8038_c0_g1_i6_g40108	TRINITY_DN4056_c0_g1_i3.p1	94.76	1126	56	2	1	1123	1	1126	0	2138	StichoBoth
DN10863_c0_g1_DN10863_c0_g1_i1_g7231	TRINITY_DN39672_c0_g1_i2.p1	49.734999999999999	378	185	3	719	1096	3	375	2.09E-107	352	Sticho2xClean
DN1341_c1_g1_DN1341_c1_g1_i8_g114604	TRINITY_DN46568_c0_g1_i1.p1	90.244	205	19	1	1	205	39	242	4.0199999999999999E-86	255	Sticho2xClean
DN1446_c3_g1_DN1446_c3_g1_i2_g63416	TRINITY_DN827_c0_g1_i17.p1	83.751000000000005	997	124	4	16	976	14	1008	0	1711	Sticho2xClean
DN1523_c0_g1_DN1523_c0_g1_i4_g94058	TRINITY_DN8307_c0_g2_i1.p1	89.247	186	20	0	309	494	1	186	5.2800000000000003E-107	333	Sticho2xClean
DN1603_c0_g1_DN1603_c0_g1_i7_g121738	TRINITY_DN1203_c0_g1_i1.p1	96.667000000000002	1890	62	1	1796	3685	1	1889	0	3816	Sticho2xClean
DN1700_c0_g1_DN1700_c0_g1_i11_g71464	TRINITY_DN2428_c0_g2_i1.p1	86.905000000000001	420	54	1	1	419	8	427	0	696	Sticho2xClean
DN261_c0_g1_DN261_c0_g1_i25_g30933	TRINITY_DN31246_c0_g1_i4.p1	94.872	156	8	0	1	156	9	164	5.3600000000000005E-110	311	Sticho2xClean
DN2797_c0_g1_DN2797_c0_g1_i12_g26224	TRINITY_DN3569_c0_g1_i8.p1	75.825000000000003	939	214	5	22	955	2	932	0	1469	Sticho2xClean
DN37649_c0_g1_DN37649_c0_g1_i1_g49485	TRINITY_DN11579_c0_g1_i3.p1	83.768000000000001	345	54	2	1	344	1	344	0	561	Sticho2xClean
DN3953_c0_g1_DN3953_c0_g1_i19_g34087	TRINITY_DN9243_c0_g1_i2.p1	99.296000000000006	284	2	0	1	284	1	284	0	573	Sticho2xClean
DN49405_c0_g1_DN49405_c0_g1_i4_g71100	TRINITY_DN54326_c0_g1_i2.p1	92.447000000000003	662	50	0	997	1658	1	662	0	1176	Sticho2xClean
DN5258_c0_g1_DN5258_c0_g1_i1_g42145	TRINITY_DN10537_c0_g1_i2.p1	93.947000000000003	826	47	1	52	874	1	826	0	1606	Sticho2xClean
DN53897_c0_g1_DN53897_c0_g1_i5_g21877	TRINITY_DN25259_c0_g1_i8.p1	97.11	173	5	0	1	173	1	173	4.0300000000000002E-123	344	Sticho2xClean
DN5654_c0_g1_DN5654_c0_g1_i1_g322	TRINITY_DN28792_c0_g1_i1.p1	94.736999999999995	171	9	0	587	757	1	171	5.37E-108	329	Sticho2xClean
DN66169_c0_g2_DN66169_c0_g2_i1_g14672	TRINITY_DN11251_c0_g1_i1.p1	93.832999999999998	227	14	0	1	227	143	369	1.04E-150	428	Sticho2xClean
DN6761_c0_g1_DN6761_c0_g1_i18_g29882	TRINITY_DN4009_c0_g1_i14.p2	97.715999999999994	394	9	0	1	394	57	450	0	808	Sticho2xClean
DN691_c1_g1_DN691_c1_g1_i1_g36824	TRINITY_DN68189_c0_g1_i2.p1	98.784999999999997	247	3	0	1	247	1	247	1.8599999999999999E-179	492	Sticho2xClean
DN7_c0_g1_DN7_c0_g1_i2_g2452	TRINITY_DN4279_c0_g1_i1.p1	98.382999999999996	1299	20	1	310	1608	1	1298	0	2637	Sticho2xClean
DN822_c0_g1_DN822_c0_g1_i19_g15957	TRINITY_DN14383_c0_g1_i12.p1	89.843999999999994	256	26	0	14	269	14	269	4.8899999999999998E-168	486	Sticho2xClean
DN870_c0_g1_DN870_c0_g1_i1_g15228	TRINITY_DN2716_c0_g1_i20.p1	98.478999999999999	526	8	0	1	526	48	573	0	1050	Sticho2xClean
DN892_c0_g1_DN892_c0_g1_i1_g15992	TRINITY_DN314_c0_g1_i12.p1	94.117999999999995	663	39	0	1	663	25	687	0	1278	Sticho2xClean
DN94892_c0_g1_DN94892_c0_g1_i1_g100498	TRINITY_DN8899_c0_g1_i2.p2	87.441999999999993	215	26	1	1	215	1	214	6.0000000000000004E-140	390	Sticho2xClean
DN988_c1_g1_DN988_c1_g1_i2_g88251	TRINITY_DN40_c0_g1_i6.p1	94.73	816	43	0	169	984	1	816	0	1610	Sticho2xClean

## Sheet: AntivSticho_in_StichvAnti
QseqID	SseqID	pident	length	mismatch	gapopen	qstart	qend	sstart	send	evalue	bitscore	Fraction	Fraction
TRINITY_DN10301_c0_g1_i3.p1	DN2345_c0_g1_DN2345_c0_g1_i10_g61734	89.524000000000001	525	26	3	1	498	6	528	0	889	Anti1xClean	Sticho1xClean
TRINITY_DN10484_c0_g1_i1.p1	DN5014_c0_g1_DN5014_c0_g1_i1_g109029	97.11	173	5	0	37	209	1	173	6.3499999999999995E-126	352	Anti1xClean	Sticho1xClean
TRINITY_DN11187_c0_g2_i3.p1	DN4640_c0_g1_DN4640_c0_g1_i1_g99431	86.307000000000002	241	27	1	43	283	1	235	3.78E-147	411	Anti1xClean	Sticho1xClean
TRINITY_DN1469_c0_g1_i1.p1	DN60605_c0_g1_DN60605_c0_g1_i1_g55574	98.230999999999995	2035	31	1	1	2030	253	2287	0	4030	Anti1xClean	StichoInboth
TRINITY_DN1491_c0_g1_i1.p1	DN863_c0_g1_DN863_c0_g1_i21_g15550	81.954999999999998	399	72	0	12	410	284	682	0	659	Anti1xClean	Sticho1xClean
TRINITY_DN1513_c0_g1_i5.p1	DN1772_c0_g1_DN1772_c0_g1_i9_g72338	93.32	973	63	1	1	971	268	1240	0	1790	Anti1xClean	Sticho1xClean
TRINITY_DN21906_c0_g2_i4.p1	DN3976_c0_g2_DN3976_c0_g2_i2_g33881	75.722999999999999	173	36	2	1	172	99	266	5.5799999999999999E-83	246	Anti1xClean	StichoInboth
TRINITY_DN26948_c0_g1_i2.p1	DN5232_c0_g1_DN5232_c0_g1_i1_g42288	96.707999999999998	243	8	0	1	243	33	275	9.8199999999999999E-159	441	Anti1xClean	Sticho1xClean
TRINITY_DN2941_c0_g1_i1.p1	DN4625_c0_g1_DN4625_c0_g1_i1_g99150	97.195999999999998	214	6	0	1	214	33	246	1.02E-152	423	Anti1xClean	Sticho1xClean
TRINITY_DN4164_c0_g2_i1.p1	DN1853_c0_g1_DN1853_c0_g1_i7_g102319	99.605000000000004	506	2	0	25	530	1	506	0	1001	Anti1xClean	Sticho1xClean
TRINITY_DN42621_c0_g1_i1.p1	DN43959_c0_g1_DN43959_c0_g1_i1_g68198	88.838999999999999	224	25	0	1	224	66	289	7.7899999999999996E-134	391	Anti1xClean	Sticho1xClean
TRINITY_DN43166_c0_g2_i4.p1	DN16324_c0_g1_DN16324_c0_g1_i1_g13613	97.516999999999996	604	15	0	1	604	1	604	0	1234	Anti1xClean	StichoInboth
TRINITY_DN46568_c0_g1_i1.p1	DN1341_c1_g1_DN1341_c1_g1_i8_g114604	85.366	205	29	1	39	242	1	205	1.0999999999999999E-90	267	Anti1xClean	Sticho2xClean
TRINITY_DN530_c2_g1_i19.p1	DN3883_c0_g1_DN3883_c0_g1_i2_g4966	93.899000000000001	1344	79	3	1	1342	1	1343	0	2516	Anti1xClean	StichoInboth
TRINITY_DN5715_c0_g1_i10.p1	DN503_c0_g1_DN503_c0_g1_i11_g82128	85.07	710	98	2	1	702	1	710	0	1231	Anti1xClean	StichoInboth
TRINITY_DN598_c0_g1_i2.p1	DN357_c0_g2_DN357_c0_g2_i11_g106115	82.906000000000006	351	41	1	5	355	2	333	0	584	Anti1xClean	Sticho1xClean
TRINITY_DN8307_c0_g2_i1.p1	DN1523_c0_g1_DN1523_c0_g1_i4_g94058	89.247	186	20	0	1	186	309	494	6.9399999999999996E-108	333	Anti1xClean	Sticho2xClean
TRINITY_DN846_c0_g1_i1.p1	DN6419_c0_g1_DN6419_c0_g1_i3_g97180	85.713999999999999	245	32	1	5	246	2	246	3.7200000000000003E-154	432	Anti1xClean	StichoInboth
TRINITY_DN10028_c0_g1_i1.p1	DN63286_c0_g1_DN63286_c0_g1_i7_g34449	99.67	303	1	0	5	307	52	354	0	617	AntiInboth	StichoInboth
TRINITY_DN10182_c0_g1_i1.p1	DN29130_c0_g1_DN29130_c0_g1_i1_g19681	68.272999999999996	249	45	3	25	239	1	249	6.2700000000000002E-118	336	AntiInboth	StichoInboth
TRINITY_DN10207_c0_g1_i1.p1	DN35676_c0_g1_DN35676_c0_g1_i1_g67356	97.8	409	7	2	1	408	1	408	0	800	AntiInboth	StichoInboth
TRINITY_DN10537_c0_g1_i2.p1	DN5258_c0_g1_DN5258_c0_g1_i1_g42145	93.947000000000003	826	47	1	1	826	52	874	0	1606	AntiInboth	Sticho2xClean
TRINITY_DN11012_c0_g1_i1.p1	DN2096_c0_g1_DN2096_c0_g1_i6_g8413	97.445999999999998	1057	27	0	1	1057	857	1913	0	2162	AntiInboth	StichoInboth
TRINITY_DN11251_c0_g1_i1.p1	DN66169_c0_g2_DN66169_c0_g2_i1_g14672	93.832999999999998	227	14	0	143	369	1	227	1.3799999999999999E-150	429	AntiInboth	Sticho2xClean
TRINITY_DN134_c0_g2_i1.p1	DN1467_c2_g1_DN1467_c2_g1_i3_g63655	99.402000000000001	1505	9	0	289	1793	1	1505	0	3034	AntiInboth	StichoInboth
TRINITY_DN14331_c0_g1_i1.p1	DN37267_c0_g1_DN37267_c0_g1_i4_g62755	86.4	250	34	0	1	250	1	250	1.49E-147	412	AntiInboth	Sticho1xClean
TRINITY_DN16272_c0_g1_i2.p1	DN52404_c0_g2_DN52404_c0_g2_i3_g55310	91.667000000000002	252	19	1	1	250	12	263	5.5400000000000002E-105	304	AntiInboth	StichoInboth
TRINITY_DN2428_c0_g2_i1.p1	DN1700_c0_g1_DN1700_c0_g1_i11_g71464	86.905000000000001	420	54	1	8	427	1	419	0	716	AntiInboth	Sticho2xClean
TRINITY_DN2668_c0_g2_i1.p1	DN70_c0_g1_DN70_c0_g1_i6_g3374	76.908000000000001	498	110	3	50	542	31	528	0	738	AntiInboth	Sticho2xClean
TRINITY_DN2876_c0_g1_i7.p1	DN6570_c0_g1_DN6570_c0_g1_i2_g49053	98.388999999999996	993	16	0	1	993	1	993	0	2026	AntiInboth	StichoInboth
TRINITY_DN28792_c0_g1_i1.p1	DN5654_c0_g1_DN5654_c0_g1_i1_g322	94.736999999999995	171	9	0	1	171	587	757	9.2600000000000007E-109	329	AntiInboth	Sticho2xClean
TRINITY_DN2887_c0_g1_i7.p1	DN4091_c0_g1_DN4091_c0_g1_i4_g34642	97.206999999999994	1611	45	0	1	1611	1	1611	0	2899	AntiInboth	StichoInboth
TRINITY_DN2984_c0_g1_i4.p1	DN1932_c0_g1_DN1932_c0_g1_i7_g54941	98.918999999999997	2959	32	0	1	2959	1	2959	0	5934	AntiInboth	StichoInboth
TRINITY_DN3033_c0_g1_i4.p1	DN295_c0_g1_DN295_c0_g1_i5_g31922	92.480999999999995	133	10	0	1	133	1	133	4.5700000000000001E-83	239	AntiInboth	StichoInboth
TRINITY_DN35252_c0_g1_i1.p1	DN6324_c0_g1_DN6324_c0_g1_i1_g67217	96.375	331	12	0	38	368	3	333	0	669	AntiInboth	Sticho1xClean
TRINITY_DN36455_c0_g1_i3.p1	DN2216_c0_g1_DN2216_c0_g1_i2_g113162	96.429000000000002	420	14	1	24	442	1	420	0	771	AntiInboth	Sticho1xClean
TRINITY_DN3751_c0_g1_i1.p1	DN3307_c0_g1_DN3307_c0_g1_i2_g91834	95.283000000000001	1378	65	0	1	1378	1	1378	0	1814	AntiInboth	StichoInboth
TRINITY_DN3769_c0_g1_i7.p1	DN2366_c0_g1_DN2366_c0_g1_i2_g62183	98.149000000000001	2809	48	1	1	2809	1	2805	0	5424	AntiInboth	StichoInboth
TRINITY_DN39201_c0_g1_i2.p1	DN5262_c0_g1_DN5262_c0_g1_i1_g42328	91.903000000000006	247	20	0	1	247	163	409	7.0599999999999998E-169	488	AntiInboth	Sticho2xClean
TRINITY_DN4056_c0_g1_i3.p1	DN8038_c0_g1_DN8038_c0_g1_i6_g40108	94.286000000000001	1120	61	2	1	1120	1	1117	0	2108	AntiInboth	StichoInboth
TRINITY_DN4189_c0_g1_i2.p1	DN3964_c0_g1_DN3964_c0_g1_i38_g34174	95.099000000000004	2571	95	1	1	2540	657	3227	0	4781	AntiInboth	Sticho1xClean
TRINITY_DN4279_c0_g1_i1.p1	DN7_c0_g1_DN7_c0_g1_i2_g2452	98.382999999999996	1299	20	1	1	1298	310	1608	0	2637	AntiInboth	Sticho2xClean
TRINITY_DN49056_c0_g1_i1.p2	DN41992_c0_g1_DN41992_c0_g1_i2_g90602	91.2	125	11	0	45	169	1	125	9.6100000000000002E-79	230	AntiInboth	StichoInboth
TRINITY_DN502_c0_g1_i3.p1	DN1036_c0_g2_DN1036_c0_g2_i1_g104529	100	191	0	0	1	191	1	191	1.8E-137	381	AntiInboth	Sticho1xClean
TRINITY_DN5031_c0_g1_i2.p1	DN168_c0_g1_DN168_c0_g1_i12_g76555	97.114000000000004	589	17	0	1	589	32	620	0	1186	AntiInboth	Sticho1xClean
TRINITY_DN507_c0_g1_i17.p1	DN26_c0_g1_DN26_c0_g1_i3_g3085	72.337000000000003	676	136	3	244	877	1	667	0	882	AntiInboth	Sticho1xClean
TRINITY_DN5412_c0_g1_i4.p1	DN4023_c0_g1_DN4023_c0_g1_i1_g35045	98.186999999999998	662	12	0	42	703	1	662	0	1348	AntiInboth	StichoInboth
TRINITY_DN54326_c0_g1_i2.p1	DN49405_c0_g1_DN49405_c0_g1_i4_g71100	92.447000000000003	662	50	0	1	662	997	1658	0	1171	AntiInboth	Sticho2xClean
TRINITY_DN5487_c0_g1_i3.p1	DN1302_c0_g1_DN1302_c0_g1_i1_g114314	97.183000000000007	284	8	0	1018	1301	35	318	0	597	AntiInboth	Sticho2xClean
TRINITY_DN5790_c0_g1_i14.p1	DN360_c0_g1_DN360_c0_g1_i8_g104967	92.120999999999995	165	13	0	4	168	7	171	6.8499999999999997E-97	285	AntiInboth	Sticho1xClean
TRINITY_DN5867_c0_g3_i1.p1	DN1204_c0_g1_DN1204_c0_g1_i4_g86269	95.673000000000002	208	9	0	1	208	1	208	1.7199999999999999E-140	399	AntiInboth	Sticho1xClean
TRINITY_DN6024_c0_g1_i2.p1	DN209_c0_g1_DN209_c0_g1_i2_g31743	92.981999999999999	1083	75	1	1	1083	422	1503	0	1570	AntiInboth	StichoInboth
TRINITY_DN7696_c0_g1_i3.p1	DN1027_c0_g1_DN1027_c0_g1_i3_g103497	96.236999999999995	372	14	0	1	372	1	372	0	756	AntiInboth	StichoInboth
TRINITY_DN8297_c0_g1_i1.p1	DN3118_c0_g1_DN3118_c0_g1_i3_g38001	95.275999999999996	889	42	0	1	889	78	966	0	1752	AntiInboth	StichoInboth
TRINITY_DN878_c0_g2_i3.p1	DN21_c0_g4_DN21_c0_g4_i1_g3027	88	350	40	2	1	349	29	377	0	622	AntiInboth	StichoInboth
TRINITY_DN934_c0_g1_i4.p1	DN39562_c0_g1_DN39562_c0_g1_i5_g73233	90.951999999999998	210	19	0	1	210	1	210	3.6900000000000002E-135	377	AntiInboth	StichoInboth
TRINITY_DN980_c1_g1_i3.p1	DN2512_c0_g1_DN2512_c0_g1_i4_g45459	89.495999999999995	1647	165	4	1	1643	100	1742	0	2116	AntiInboth	StichoInboth
TRINITY_DN99_c0_g1_i2.p1	DN1521_c0_g1_DN1521_c0_g1_i7_g93803	92.581999999999994	1065	79	0	1	1065	96	1160	0	2030	AntiInboth	StichoInboth
TRINITY_DN10314_c0_g1_i4.p1	DN60890_c0_g1_DN60890_c0_g1_i1_g87043	90.78	141	13	0	1	141	25	165	6.9900000000000003E-94	268	Anti2xClean	StichoInboth
TRINITY_DN10319_c0_g1_i1.p1	DN16795_c0_g1_DN16795_c0_g1_i1_g119606	95.858000000000004	169	7	0	6	174	18	186	3.6300000000000002E-121	339	Anti2xClean	StichoInboth
TRINITY_DN1157_c0_g1_i1.p1	DN268_c5_g1_DN268_c5_g1_i1_g30863	86.052000000000007	423	45	1	3	425	1	409	0	737	Anti2xClean	StichoInboth
TRINITY_DN11770_c0_g2_i6.p1	DN3834_c0_g1_DN3834_c0_g1_i2_g4618	98.238	227	4	0	2	228	5	231	4.28E-165	454	Anti2xClean	Sticho1xClean
TRINITY_DN1203_c0_g1_i1.p1	DN1603_c0_g1_DN1603_c0_g1_i7_g121738	96.667000000000002	1890	62	1	1	1889	1796	3685	0	3816	Anti2xClean	Sticho2xClean
TRINITY_DN13319_c0_g1_i2.p1	DN272_c16_g1_DN272_c16_g1_i2_g32023	92.991	214	13	2	3	215	2	214	6.4399999999999998E-143	397	Anti2xClean	StichoInboth
TRINITY_DN1399_c0_g1_i13.p1	DN7752_c0_g1_DN7752_c0_g1_i15_g56139	92.409000000000006	303	22	1	31	332	1	303	0	548	Anti2xClean	Sticho2xClean
TRINITY_DN14383_c0_g1_i12.p1	DN822_c0_g1_DN822_c0_g1_i19_g15957	89.843999999999994	256	26	0	14	269	14	269	4.21E-168	486	Anti2xClean	Sticho2xClean
TRINITY_DN21208_c0_g1_i1.p1	DN2042_c0_g1_DN2042_c0_g1_i2_g8370	91.918999999999997	792	58	1	1	786	350	1141	0	1445	Anti2xClean	StichoInboth
TRINITY_DN314_c0_g1_i12.p1	DN892_c0_g1_DN892_c0_g1_i1_g15992	94.117999999999995	663	39	0	25	687	1	663	0	1296	Anti2xClean	Sticho2xClean
TRINITY_DN329_c0_g1_i19.p1	DN348_c0_g1_DN348_c0_g1_i20_g105236	91.885999999999996	493	40	0	1	493	1	493	0	949	Anti2xClean	StichoInboth
TRINITY_DN3569_c0_g1_i1.p1	DN2797_c0_g1_DN2797_c0_g1_i12_g26224	56.29	938	390	11	2	926	22	952	0	1093	Anti2xClean	StichoInboth
TRINITY_DN3569_c0_g1_i20.p1	DN2797_c0_g1_DN2797_c0_g1_i5_g26231	76.491	872	200	4	2	873	22	888	0	1411	Anti2xClean	Sticho2xClean
